# Supplementary material for: Unveiling the influence of tumor and immune signatures on immune checkpoint therapy in advanced lung cancer
Source: eLife. 2024 Nov 8;13:RP98366. doi: 10.7554/eLife.98366 (PMC11548875; doi:10.7554/eLife.98366)
Supplement: Supplementary file 2. [file elife-98366-supp2.xlsx]

## Sheet: Total cells
Table S2. List of genes specific to the cell clusters in total cells and each cell lineage.
gene	avg_logFC	p_val	p_val_adj	pct.1	pct.2	cluster
IL7R	1.64592	0	0	0.672	0.111	0
TCF7	1.1705	0	0	0.531	0.133	0
LTB	1.04871	0	0	0.744	0.24	0
CD3E	0.981106	0	0	0.774	0.216	0
TNFAIP3	0.957443	0	0	0.647	0.388	0
DNAJB1	0.940006	0	0	0.704	0.555	0
ZFP36L2	0.904125	0	0	0.837	0.642	0
SARAF	0.898832	0	0	0.867	0.72	0
LEF1	0.894235	0	0	0.404	0.06	0
KLF2	0.885805	0	0	0.513	0.338	0
FYB1	0.885744	0	0	0.703	0.31	0
TRAC	0.883748	0	0	0.589	0.196	0
CD3D	0.874417	0	0	0.773	0.208	0
CCR7	0.850451	0	0	0.461	0.088	0
TSC22D3	0.835172	0	0	0.764	0.522	0
SLC2A3	0.822771	0	0	0.571	0.293	0
LEPROTL1	0.813756	0	0	0.659	0.38	0
GIMAP7	0.811544	0	0	0.541	0.159	0
JUNB	0.790977	0	0	0.859	0.785	0
RGCC	0.789597	0	0	0.571	0.318	0
SPOCK2	0.788973	0	0	0.578	0.184	0
TRBC2	0.77006	0	0	0.634	0.244	0
CD6	0.750584	0	0	0.48	0.12	0
SELL	0.747053	0	0	0.424	0.152	0
BTG1	0.745308	0	0	0.94	0.818	0
PIK3IP1	0.742089	0	0	0.504	0.205	0
FXYD5	0.737038	0	0	0.792	0.571	0
CD2	0.736718	0	0	0.661	0.208	0
CD69	0.722614	0	0	0.668	0.295	0
ACAP1	0.710325	0	0	0.62	0.26	0
PTPRC	0.706719	0	0	0.777	0.395	0
CD3G	0.697358	0	0	0.578	0.153	0
JUN	0.695064	0	0	0.771	0.74	0
BCL11B	0.690614	0	0	0.487	0.188	0
LCK	0.68056	0	0	0.627	0.213	0
TRBC1	0.679031	0	0	0.442	0.165	0
IKZF1	0.675662	0	0	0.54	0.23	0
CXCR4	0.6706	0	0	0.782	0.466	0
LAT	0.668431	0	0	0.53	0.178	0
LIME1	0.668392	0	0	0.57	0.245	0
CAMK4	0.665058	0	0	0.4	0.118	0
ETS1	0.663891	0	0	0.508	0.225	0
PCED1B-AS1	0.655517	0	0	0.596	0.274	0
PTGER4	0.653491	0	0	0.423	0.194	0
FLT3LG	0.642201	0	0	0.401	0.122	0
GIMAP5	0.638661	0	0	0.401	0.11	0
IL32	0.633527	0	0	0.832	0.368	0
CD48	0.629098	0	0	0.658	0.319	0
CD5	0.621999	0	0	0.38	0.079	0
EVL	0.620882	0	0	0.717	0.466	0
AL138963.4	0.610601	0	0	0.38	0.245	0
RPS12	0.599983	0	0	0.961	0.972	0
ITK	0.599075	0	0	0.368	0.095	0
FOS	0.597973	0	0	0.709	0.701	0
NOSIP	0.59794	0	0	0.472	0.359	0
ARHGAP15	0.59424	0	0	0.454	0.176	0
ZAP70	0.588761	0	0	0.454	0.14	0
CD52	0.587894	0	0	0.822	0.421	0
RPL30	0.585438	0	0	0.954	0.966	0
TRAF3IP3	0.585332	0	0	0.477	0.189	0
GIMAP4	0.584775	0	0	0.458	0.172	0
RPS27	0.584108	0	0	0.971	0.977	0
RPL34	0.583994	0	0	0.951	0.965	0
SEPTIN1	0.581064	0	0	0.53	0.264	0
ARHGDIB	0.580339	0	0	0.847	0.573	0
ARHGEF1	0.578566	0	0	0.549	0.363	0
YPEL5	0.575436	0	0	0.575	0.502	0
PRKCQ-AS1	0.574514	0	0	0.309	0.074	0
DUSP1	0.56938	0	0	0.728	0.673	0
LIMD2	0.557046	0	0	0.69	0.454	0
SF1	0.55664	0	0	0.693	0.621	0
STK4	0.554945	0	0	0.609	0.419	0
PBXIP1	0.5542	0	0	0.441	0.24	0
PDE3B	0.553015	0	0	0.302	0.093	0
IFITM1	0.546655	0	0	0.622	0.336	0
TMC8	0.545036	0	0	0.39	0.175	0
TRAT1	0.544428	0	0	0.317	0.057	0
INPP4B	0.542603	0	0	0.334	0.11	0
RPL32	0.538137	0	0	0.958	0.972	0
DGKA	0.536101	0	0	0.335	0.118	0
FOXP1	0.535014	0	0	0.525	0.386	0
AAK1	0.532097	0	0	0.425	0.265	0
JUND	0.532058	0	0	0.659	0.675	0
EEF1A1	0.529547	0	0	0.977	0.986	0
CD7	0.523719	0	0	0.603	0.219	0
RPS25	0.520632	0	0	0.947	0.955	0
RAPGEF6	0.52011	0	0	0.358	0.198	0
NOP53	0.518424	0	0	0.797	0.707	0
PABPC1	0.518307	0	0	0.874	0.841	0
GMFG	0.514807	0	0	0.672	0.366	0
MBNL1	0.511484	0	0	0.569	0.457	0
RPS15A	0.510853	0	0	0.958	0.969	0
TBC1D10C	0.503363	0	0	0.513	0.231	0
BTG2	0.502607	0	0	0.602	0.539	0
RPS29	0.499966	0	0	0.92	0.919	0
STK17B	0.499528	0	0	0.58	0.368	0
RIPOR2	0.498734	0	0	0.407	0.191	0
MYADM	0.497107	0	0	0.442	0.337	0
MAL	0.496816	0	0	0.316	0.048	0
GPSM3	0.49655	0	0	0.643	0.384	0
RPS27A	0.494429	0	0	0.957	0.973	0
KLF6	0.494373	0	0	0.761	0.689	0
CYTIP	0.494097	0	0	0.583	0.321	0
ARHGAP45	0.493161	0	0	0.443	0.237	0
ZFP36	0.492957	0	0	0.756	0.695	0
CLEC2D	0.492485	0	0	0.436	0.2	0
TC2N	0.492072	0	0	0.359	0.17	0
DDIT4	0.490725	0	0	0.504	0.391	0
TSPYL2	0.490079	0	0	0.358	0.24	0
STK17A	0.487792	0	0	0.583	0.383	0
IL2RG	0.485785	0	0	0.648	0.33	0
RPS28	0.483274	0	0	0.946	0.959	0
ABLIM1	0.48159	0	0	0.326	0.158	0
GSTK1	0.48054	0	0	0.65	0.538	0
ZC3HAV1	0.47811	0	0	0.457	0.325	0
OXNAD1	0.477921	0	0	0.312	0.112	0
RHOH	0.477696	0	0	0.483	0.218	0
ATM	0.477681	0	0	0.396	0.268	0
GIMAP1	0.477332	0	0	0.343	0.104	0
FCMR	0.477103	0	0	0.428	0.175	0
CD96	0.468126	0	0	0.387	0.136	0
ITM2A	0.468031	0	0	0.416	0.171	0
S1PR1	0.467002	0	0	0.279	0.068	0
EEF1B2	0.46567	0	0	0.86	0.849	0
ANKRD12	0.465334	0	0	0.574	0.49	0
CORO1A	0.465245	0	0	0.79	0.494	0
MALAT1	0.464224	0	0	0.989	0.926	0
RPS3	0.463651	0	0	0.955	0.966	0
FYN	0.461467	0	0	0.527	0.33	0
ELF1	0.461304	0	0	0.548	0.407	0
ICOS	0.455385	0	0	0.278	0.074	0
PNRC1	0.454402	0	0	0.783	0.732	0
RORA	0.453877	0	0	0.363	0.211	0
GPR183	0.452273	0	0	0.438	0.188	0
SATB1	0.450176	0	0	0.307	0.141	0
ARL4C	0.449186	0	0	0.577	0.395	0
TAGAP	0.4485	0	0	0.424	0.221	0
RPS14	0.44715	0	0	0.955	0.971	0
EML4	0.446844	0	0	0.508	0.424	0
RPS13	0.445704	0	0	0.935	0.955	0
PPP1R2	0.444846	0	0	0.526	0.44	0
GYPC	0.444222	0	0	0.518	0.285	0
JAK3	0.4434	0	0	0.307	0.119	0
RPL13	0.443029	0	0	0.969	0.982	0
TPT1	0.441672	0	0	0.954	0.969	0
RCAN3	0.441496	0	0	0.362	0.209	0
RESF1	0.440646	0	0	0.427	0.295	0
SKAP1	0.44033	0	0	0.407	0.182	0
PPP2R5C	0.438166	0	0	0.467	0.37	0
LINC00861	0.43378	0	0	0.254	0.062	0
SEPTIN6	0.431008	0	0	0.489	0.334	0
HLA-E	0.429669	0	0	0.903	0.755	0
RBL2	0.429396	0	0	0.398	0.268	0
RPL28	0.429038	0	0	0.963	0.976	0
ICAM3	0.428687	0	0	0.504	0.283	0
RPL14	0.4286	0	0	0.937	0.939	0
RPS3A	0.427817	0	0	0.948	0.962	0
PLK3	0.42689	0	0	0.361	0.248	0
RPS4Y1	0.42663	0	0	0.685	0.593	0
RAC2	0.424209	0	0	0.699	0.426	0
CD28	0.423486	0	0	0.255	0.048	0
CCNH	0.423352	0	0	0.4	0.31	0
MGAT4A	0.422075	0	0	0.356	0.203	0
SRSF7	0.419176	0	0	0.733	0.684	0
CD44	0.417401	0	0	0.672	0.496	0
DDX24	0.415925	0	0	0.619	0.556	0
PDE7A	0.415547	0	0	0.36	0.247	0
SUN2	0.415413	0	0	0.486	0.341	0
ARID5A	0.414436	0	0	0.388	0.243	0
SEPTIN9	0.413807	0	0	0.583	0.501	0
CNN2	0.413502	0	0	0.523	0.39	0
EEF1D	0.411693	0	0	0.897	0.872	0
CD27	0.411413	0	0	0.418	0.152	0
RPLP2	0.411194	0	0	0.95	0.959	0
TXNIP	0.409242	0	0	0.616	0.491	0
IL16	0.40885	0	0	0.378	0.17	0
RPL10	0.407384	0	0	0.975	0.987	0
SOCS1	0.399222	0	0	0.343	0.242	0
RPL21	0.39654	0	0	0.946	0.955	0
DENND2D	0.395507	0	0	0.36	0.215	0
RASGRP2	0.395417	0	0	0.323	0.128	0
SMCHD1	0.394707	0	0	0.486	0.404	0
RPL39	0.394661	0	0	0.945	0.965	0
MCUB	0.393241	0	0	0.413	0.278	0
RPL11	0.392996	0	0	0.954	0.972	0
ANKRD44	0.392229	0	0	0.384	0.24	0
PDCD4	0.387149	0	0	0.444	0.344	0
PAG1	0.386873	0	0	0.318	0.171	0
GATA3	0.386721	0	0	0.279	0.11	0
RPSA	0.385987	0	0	0.914	0.91	0
RPS8	0.385342	0	0	0.95	0.968	0
CYLD	0.384304	0	0	0.368	0.243	0
HSPA8	0.384254	0	0	0.837	0.822	0
PRKCH	0.382923	0	0	0.389	0.212	0
RASAL3	0.380755	0	0	0.358	0.172	0
CDC42SE2	0.380313	0	0	0.407	0.305	0
NCK2	0.38	0	0	0.325	0.196	0
RPS21	0.378408	0	0	0.914	0.922	0
STAT4	0.377106	0	0	0.269	0.108	0
TNFAIP8	0.375475	0	0	0.428	0.281	0
LDHB	0.375389	0	0	0.756	0.647	0
FKBP5	0.374781	0	0	0.3	0.182	0
LCP2	0.372722	0	0	0.444	0.224	0
RPS6	0.371994	0	0	0.951	0.963	0
ARHGAP4	0.371379	0	0	0.383	0.265	0
DUSP2	0.369738	0	0	0.565	0.367	0
WIPF1	0.366425	0	0	0.489	0.325	0
SEMA4D	0.366049	0	0	0.331	0.192	0
RPS23	0.365668	0	0	0.946	0.965	0
C16orf54	0.365591	0	0	0.254	0.088	0
NSMCE3	0.364029	0	0	0.349	0.253	0
RNF125	0.363803	0	0	0.266	0.108	0
DEF6	0.360266	0	0	0.352	0.205	0
CCND3	0.359453	0	0	0.5	0.371	0
RPL3	0.355868	0	0	0.947	0.959	0
TMEM123	0.354311	0	0	0.519	0.432	0
CYTH1	0.35394	0	0	0.379	0.279	0
SORL1	0.353304	0	0	0.322	0.227	0
FAU	0.353177	0	0	0.941	0.95	0
PIM2	0.353089	0	0	0.352	0.2	0
TUBA4A	0.351813	0	0	0.451	0.324	0
HLA-B	0.34913	0	0	0.957	0.858	0
RPL5	0.346731	0	0	0.917	0.924	0
BIN2	0.345661	0	0	0.394	0.192	0
FOXO1	0.345161	0	0	0.3	0.163	0
RPL41	0.341352	0	0	0.973	0.988	0
RGS10	0.336326	0	0	0.515	0.372	0
MAML2	0.335892	0	0	0.252	0.156	0
SMAP2	0.334948	0	0	0.429	0.314	0
DDX5	0.334745	0	0	0.896	0.858	0
AKNA	0.334581	0	0	0.378	0.242	0
ICAM2	0.332723	0	0	0.298	0.136	0
IL10RA	0.331159	0	0	0.34	0.206	0
GZMM	0.330771	0	0	0.396	0.163	0
TTC39C	0.330515	0	0	0.3	0.199	0
RPL9	0.328472	0	0	0.933	0.946	0
RPL18	0.324341	0	0	0.94	0.954	0
RPS15	0.32414	0	0	0.954	0.969	0
SLFN5	0.323867	0	0	0.318	0.195	0
RPL19	0.323254	0	0	0.954	0.971	0
SIT1	0.321931	0	0	0.28	0.111	0
HCLS1	0.319973	0	0	0.53	0.357	0
HCST	0.317863	0	0	0.663	0.36	0
EMB	0.317346	0	0	0.361	0.24	0
LBH	0.316793	0	0	0.441	0.293	0
PITPNC1	0.316048	0	0	0.298	0.179	0
IL27RA	0.314296	0	0	0.266	0.149	0
RPL18A	0.313274	0	0	0.951	0.966	0
TLE5	0.312631	0	0	0.654	0.601	0
RPL35A	0.312286	0	0	0.938	0.956	0
FGD3	0.312249	0	0	0.261	0.121	0
BIRC3	0.312204	0	0	0.389	0.26	0
RPL36	0.31135	0	0	0.93	0.946	0
B2M	0.310922	0	0	0.982	0.975	0
RPL22	0.310427	0	0	0.888	0.913	0
RASGRP1	0.309588	0	0	0.256	0.13	0
S1PR4	0.307162	0	0	0.269	0.127	0
TOMM7	0.304805	0	0	0.821	0.807	0
APBB1IP	0.302778	0	0	0.399	0.236	0
SRSF5	0.301226	0	0	0.738	0.715	0
PARP8	0.29858	0	0	0.291	0.185	0
CD4	0.296584	0	0	0.251	0.11	0
ARHGAP9	0.290367	0	0	0.362	0.205	0
CYFIP2	0.290126	0	0	0.34	0.23	0
CD247	0.286582	0	0	0.447	0.174	0
TGFB1	0.286217	0	0	0.485	0.354	0
RPL4	0.286211	0	0	0.89	0.886	0
RPL23A	0.285334	0	0	0.941	0.954	0
RPL31	0.285032	0	0	0.898	0.9	0
RPL37	0.278896	0	0	0.935	0.954	0
RPS4X	0.276941	0	0	0.945	0.961	0
SELPLG	0.276123	0	0	0.331	0.174	0
WAS	0.275484	0	0	0.381	0.227	0
ARHGAP30	0.274603	0	0	0.345	0.212	0
RPL29	0.274149	0	0	0.934	0.951	0
RPL26	0.2728	0	0	0.947	0.966	0
STK10	0.271408	0	0	0.312	0.199	0
EEF2	0.271064	0	0	0.858	0.861	0
RASSF5	0.26957	0	0	0.357	0.234	0
RPLP1	0.265167	0	0	0.973	0.987	0
RPL6	0.259373	0	0	0.936	0.946	0
RPL10A	0.25615	0	0	0.927	0.936	0
SRGN	0.255099	0	0	0.751	0.48	0
RPL36AL	0.252904	0	0	0.837	0.837	0
TGFBR2	0.317944	4.88494e-297	1.64691e-292	0.313	0.212	0
FAM102A	0.319056	6.57872e-296	2.21795e-291	0.301	0.207	0
FNBP1	0.326451	3.81272e-295	1.28542e-290	0.435	0.336	0
CSRNP1	0.443175	6.98381e-291	2.35452e-286	0.444	0.373	0
C12orf57	0.293613	6.43144e-288	2.1683e-283	0.633	0.598	0
PTPN7	0.268389	1.61029e-286	5.42893e-282	0.294	0.182	0
CELF2	0.333258	1.09575e-283	3.69422e-279	0.429	0.333	0
SIGIRR	0.323419	2.01543e-279	6.79482e-275	0.412	0.329	0
ITGA4	0.323822	2.8633e-279	9.65334e-275	0.308	0.201	0
IQGAP2	0.267653	3.99554e-278	1.34706e-273	0.272	0.173	0
HLA-F	0.273476	2.17496e-273	7.33264e-269	0.52	0.42	0
RPS26	0.526239	1.80014e-268	6.069e-264	0.853	0.885	0
SH3KBP1	0.273881	6.25124e-262	2.10754e-257	0.369	0.268	0
DOCK10	0.277353	1.45451e-258	4.90372e-254	0.262	0.169	0
RGS14	0.258819	4.04947e-255	1.36524e-250	0.253	0.167	0
EPB41	0.336099	3.16913e-249	1.06844e-244	0.372	0.287	0
PIK3R1	0.300275	1.94498e-247	6.55732e-243	0.343	0.25	0
JAK1	0.280116	8.53551e-246	2.87766e-241	0.555	0.504	0
VAMP2	0.267631	2.81593e-245	9.49362e-241	0.598	0.545	0
TENT5C	0.27509	1.50671e-243	5.07973e-239	0.304	0.203	0
MYH9	0.326517	4.23266e-236	1.427e-231	0.534	0.494	0
DOCK8	0.262777	5.78909e-228	1.95173e-223	0.327	0.23	0
NDFIP1	0.353865	1.05551e-224	3.55856e-220	0.485	0.458	0
TMEM173	0.27944	4.36012e-224	1.46997e-219	0.288	0.207	0
PPP1R15A	0.344881	8.30216e-217	2.79899e-212	0.613	0.612	0
LINC-PINT	0.448936	5.12064e-216	1.72637e-211	0.332	0.25	0
IDS	0.348428	3.39094e-210	1.14322e-205	0.537	0.5	0
TMEM243	0.289468	1.65858e-207	5.59173e-203	0.36	0.291	0
ADD3	0.282134	2.79101e-207	9.40961e-203	0.377	0.308	0
TMC6	0.281811	1.5071e-204	5.08104e-200	0.355	0.278	0
SLC38A1	0.298322	2.62811e-203	8.8604e-199	0.42	0.351	0
TNFRSF14	0.258516	1.27921e-202	4.31272e-198	0.389	0.315	0
TSPYL1	0.333516	8.089e-200	2.72712e-195	0.357	0.301	0
ABRACL	0.256025	4.45088e-198	1.50057e-193	0.5	0.452	0
PER1	0.317713	3.72311e-196	1.25521e-191	0.259	0.185	0
RNF213	0.312991	1.71853e-194	5.79385e-190	0.514	0.447	0
SAMSN1	0.255866	3.16502e-187	1.06706e-182	0.309	0.218	0
BCL2	0.260714	2.85224e-185	9.61604e-181	0.262	0.187	0
EPC1	0.311482	5.98177e-179	2.01669e-174	0.486	0.451	0
ADGRE5	0.274824	1.5488e-178	5.22163e-174	0.37	0.283	0
GRK6	0.250598	5.89799e-178	1.98845e-173	0.311	0.242	0
SMAD7	0.285914	5.26023e-176	1.77343e-171	0.288	0.214	0
SOCS3	0.286634	2.5359e-175	8.54953e-171	0.395	0.329	0
CNOT6L	0.343689	4.99377e-172	1.6836e-167	0.294	0.227	0
GCC2	0.318742	6.68449e-168	2.25361e-163	0.413	0.367	0
PHF1	0.276594	2.33824e-167	7.88316e-163	0.32	0.257	0
CCDC88C	0.273585	5.23738e-163	1.76573e-158	0.306	0.24	0
RNF166	0.250905	2.28891e-162	7.71682e-158	0.292	0.222	0
CDK17	0.279064	1.5078e-161	5.0834e-157	0.289	0.223	0
MT-ND4L	0.365933	2.00627e-160	6.76394e-156	0.625	0.616	0
CLK1	0.32093	2.89691e-157	9.76664e-153	0.44	0.401	0
LINC01578	0.332474	9.76304e-146	3.29151e-141	0.534	0.532	0
RSRP1	0.304649	1.47197e-130	4.9626e-126	0.495	0.47	0
NR3C1	0.333692	6.03984e-130	2.03627e-125	0.398	0.357	0
PIM1	0.286106	2.26737e-126	7.64421e-122	0.377	0.331	0
USP15	0.296511	5.9427e-126	2.00352e-121	0.387	0.346	0
IL6ST	0.319651	2.48355e-125	8.37303e-121	0.296	0.253	0
CREM	0.569861	1.33602e-123	4.50425e-119	0.391	0.35	0
ZNF331	0.287212	1.45938e-123	4.92016e-119	0.369	0.312	0
USP3	0.258819	2.67304e-113	9.0119e-109	0.276	0.232	0
C9orf78	0.252376	2.44673e-110	8.2489e-106	0.424	0.408	0
CDKN1B	0.257699	3.02943e-102	1.02134e-97	0.386	0.353	0
RNF149	0.252205	1.85286e-100	6.24672e-96	0.384	0.351	0
ARID4B	0.258134	1.55226e-89	5.23329e-85	0.501	0.499	0
MPHOSPH8	0.276115	2.9922e-88	1.00879e-83	0.449	0.445	0
CITED2	0.271012	2.92435e-83	9.85915e-79	0.402	0.375	0
G3BP2	0.269954	1.18663e-79	4.0006e-75	0.416	0.409	0
PRPF38B	0.272121	1.56123e-79	5.26353e-75	0.47	0.469	0
PCSK7	0.315379	1.69892e-76	5.72774e-72	0.313	0.284	0
TOB1	0.270946	1.82727e-72	6.16047e-68	0.368	0.352	0
HSPA1B	0.531663	2.19762e-70	7.40906e-66	0.396	0.379	0
NKTR	0.313727	8.78751e-68	2.96262e-63	0.384	0.374	0
PRMT2	0.251636	1.15194e-64	3.88364e-60	0.393	0.39	0
N4BP2L2	0.272125	3.34617e-64	1.12813e-59	0.49	0.507	0
STT3B	0.250729	2.9767e-63	1.00356e-58	0.311	0.294	0
DDX3X	0.270447	4.07585e-61	1.37413e-56	0.479	0.502	0
CHD2	0.257896	1.08193e-56	3.64761e-52	0.415	0.415	0
TMEM259	0.259215	1.96676e-53	6.63074e-49	0.38	0.379	0
FNBP4	0.261128	1.08597e-49	3.66124e-45	0.361	0.358	0
GNLY	3.05864	0	0	0.518	0.04	1
NKG7	2.81872	0	0	0.884	0.11	1
CCL5	2.31368	0	0	0.915	0.17	1
CCL4	2.29679	0	0	0.745	0.139	1
GZMB	2.22807	0	0	0.675	0.048	1
GZMH	1.97736	0	0	0.662	0.044	1
CST7	1.96379	0	0	0.848	0.138	1
CCL4L2	1.94841	0	0	0.478	0.1	1
PRF1	1.92851	0	0	0.676	0.062	1
GZMA	1.88428	0	0	0.831	0.104	1
FGFBP2	1.8179	0	0	0.337	0.009	1
CTSW	1.79022	0	0	0.737	0.109	1
KLRD1	1.58152	0	0	0.496	0.021	1
IFNG	1.57343	0	0	0.411	0.027	1
CD8A	1.53406	0	0	0.492	0.069	1
XCL2	1.30465	0	0	0.284	0.012	1
HCST	1.27481	0	0	0.878	0.345	1
GZMK	1.22246	0	0	0.391	0.076	1
CD7	1.1974	0	0	0.722	0.228	1
CMC1	1.15991	0	0	0.461	0.267	1
CD247	1.14591	0	0	0.623	0.164	1
KLRK1	1.14227	0	0	0.545	0.055	1
DUSP2	1.1019	0	0	0.727	0.353	1
LAG3	1.09573	0	0	0.384	0.06	1
APOBEC3G	1.06358	0	0	0.569	0.164	1
GZMM	1.06073	0	0	0.605	0.144	1
CD8B	1.04717	0	0	0.387	0.066	1
IFITM1	1.03925	0	0	0.694	0.347	1
IFITM2	1.03441	0	0	0.822	0.468	1
KLRB1	1.03361	0	0	0.354	0.081	1
SPON2	1.03044	0	0	0.259	0.062	1
IL32	0.989311	0	0	0.848	0.403	1
IL2RB	0.980609	0	0	0.489	0.091	1
ITGB2	0.969996	0	0	0.739	0.35	1
TRBC1	0.958169	0	0	0.566	0.165	1
CLIC3	0.957741	0	0	0.381	0.079	1
CD3E	0.922289	0	0	0.709	0.273	1
IL2RG	0.913182	0	0	0.762	0.335	1
PTPRC	0.903051	0	0	0.852	0.412	1
CD2	0.885955	0	0	0.686	0.24	1
CD3D	0.881708	0	0	0.627	0.281	1
RAC2	0.872655	0	0	0.798	0.43	1
HLA-C	0.854297	0	0	0.989	0.862	1
EFHD2	0.832379	0	0	0.532	0.357	1
GNG2	0.819806	0	0	0.519	0.169	1
TGFB1	0.819118	0	0	0.593	0.345	1
MATK	0.81903	0	0	0.373	0.056	1
FCGR3A	0.809173	0	0	0.287	0.086	1
ID2	0.808272	0	0	0.639	0.37	1
LSP1	0.805752	0	0	0.788	0.409	1
CORO1A	0.803512	0	0	0.876	0.503	1
LCK	0.800704	0	0	0.673	0.238	1
RUNX3	0.796359	0	0	0.495	0.16	1
TRBC2	0.796255	0	0	0.677	0.267	1
PLAAT4	0.796056	0	0	0.77	0.391	1
CHST12	0.790914	0	0	0.476	0.203	1
TNFAIP3	0.781997	0	0	0.69	0.402	1
DUSP4	0.781716	0	0	0.346	0.175	1
EVL	0.780175	0	0	0.782	0.475	1
HLA-A	0.773559	0	0	0.99	0.88	1
LCP1	0.770354	0	0	0.682	0.348	1
SH2D2A	0.769674	0	0	0.44	0.124	1
HOPX	0.769057	0	0	0.485	0.15	1
HLA-B	0.76844	0	0	0.99	0.86	1
CLEC2B	0.76844	0	0	0.572	0.285	1
HLA-E	0.76548	0	0	0.958	0.757	1
RGS1	0.764336	0	0	0.521	0.262	1
SPN	0.764001	0	0	0.458	0.14	1
ARL4C	0.755826	0	0	0.65	0.397	1
B2M	0.752132	0	0	0.998	0.973	1
ADGRE5	0.751051	0	0	0.551	0.257	1
SRGN	0.750687	0	0	0.923	0.47	1
CXCR4	0.739192	0	0	0.785	0.491	1
ABHD17A	0.738693	0	0	0.508	0.325	1
MYO1F	0.737044	0	0	0.433	0.139	1
METRNL	0.735624	0	0	0.368	0.18	1
CD3G	0.729481	0	0	0.498	0.202	1
BHLHE40	0.729026	0	0	0.47	0.284	1
AKNA	0.72882	0	0	0.529	0.226	1
NR4A2	0.722733	0	0	0.621	0.444	1
PRKCH	0.7217	0	0	0.512	0.204	1
TUBA4A	0.716326	0	0	0.527	0.32	1
ZAP70	0.707203	0	0	0.501	0.157	1
TIGIT	0.704948	0	0	0.359	0.074	1
ITM2A	0.704381	0	0	0.481	0.179	1
C12orf75	0.703247	0	0	0.48	0.208	1
ARHGAP9	0.703188	0	0	0.489	0.195	1
ADGRG1	0.703183	0	0	0.279	0.12	1
SH3BGRL3	0.70174	0	0	0.944	0.831	1
FYN	0.700463	0	0	0.631	0.327	1
SLC9A3R1	0.695077	0	0	0.526	0.325	1
CD99	0.691143	0	0	0.772	0.554	1
BIN2	0.679786	0	0	0.482	0.192	1
PYHIN1	0.67924	0	0	0.349	0.064	1
CD96	0.677116	0	0	0.467	0.142	1
TBX21	0.676299	0	0	0.282	0.027	1
SAMD3	0.670999	0	0	0.341	0.048	1
CCL3	0.668929	0	0	0.357	0.119	1
SLA	0.665795	0	0	0.401	0.141	1
TBC1D10C	0.664797	0	0	0.582	0.241	1
SYTL3	0.664688	0	0	0.39	0.118	1
FLNA	0.663174	0	0	0.567	0.366	1
WIPF1	0.661052	0	0	0.611	0.316	1
SUN2	0.656892	0	0	0.554	0.34	1
ZFP36L2	0.656504	0	0	0.836	0.658	1
PTPN7	0.651498	0	0	0.456	0.161	1
PCED1B-AS1	0.648756	0	0	0.636	0.293	1
ABI3	0.647584	0	0	0.377	0.107	1
GBP5	0.647032	0	0	0.413	0.124	1
PFN1	0.64415	0	0	0.962	0.878	1
LITAF	0.643957	0	0	0.649	0.517	1
CREM	0.643807	0	0	0.479	0.337	1
AOAH	0.642298	0	0	0.294	0.051	1
CD69	0.638593	0	0	0.706	0.319	1
LIME1	0.635715	0	0	0.543	0.276	1
ZEB2	0.635523	0	0	0.413	0.191	1
IKZF3	0.634242	0	0	0.411	0.134	1
MSN	0.633267	0	0	0.614	0.415	1
KLRG1	0.628842	0	0	0.251	0.051	1
PTPN22	0.623357	0	0	0.37	0.105	1
SELPLG	0.621694	0	0	0.428	0.169	1
SKAP1	0.612148	0	0	0.484	0.186	1
DOK2	0.610211	0	0	0.447	0.165	1
GIMAP7	0.608166	0	0	0.506	0.196	1
OASL	0.608063	0	0	0.316	0.1	1
PPP2R5C	0.607841	0	0	0.545	0.364	1
ITGB7	0.606846	0	0	0.392	0.133	1
CD52	0.606805	0	0	0.798	0.458	1
PSMB9	0.605962	0	0	0.751	0.53	1
PIK3R1	0.602778	0	0	0.445	0.239	1
RNF213	0.600687	0	0	0.635	0.43	1
MYL12A	0.599797	0	0	0.882	0.749	1
RASAL3	0.597958	0	0	0.463	0.168	1
HLA-F	0.597738	0	0	0.628	0.408	1
ITGAL	0.596609	0	0	0.381	0.119	1
ARHGDIB	0.593149	0	0	0.891	0.588	1
TRAC	0.592957	0	0	0.51	0.243	1
LCP2	0.589733	0	0	0.514	0.229	1
TNFRSF1B	0.586057	0	0	0.439	0.176	1
SYNE1	0.585613	0	0	0.38	0.147	1
ALOX5AP	0.581735	0	0	0.539	0.256	1
CXCR3	0.581377	0	0	0.329	0.091	1
APMAP	0.572582	0	0	0.443	0.299	1
MYO1G	0.569858	0	0	0.403	0.159	1
SLA2	0.569712	0	0	0.3	0.05	1
CD53	0.568831	0	0	0.65	0.351	1
LAT	0.567241	0	0	0.515	0.21	1
GIMAP4	0.564935	0	0	0.463	0.195	1
ETS1	0.564653	0	0	0.529	0.245	1
NFATC2	0.560433	0	0	0.376	0.151	1
LYAR	0.560212	0	0	0.367	0.216	1
JAK1	0.559641	0	0	0.637	0.494	1
SH2D1A	0.557538	0	0	0.318	0.077	1
PPP1R18	0.557479	0	0	0.511	0.313	1
ITGA4	0.556938	0	0	0.436	0.187	1
STK17A	0.554539	0	0	0.63	0.391	1
PARP8	0.552778	0	0	0.397	0.174	1
CCND2	0.549533	0	0	0.389	0.204	1
CLEC2D	0.549144	0	0	0.455	0.216	1
TPST2	0.54679	0	0	0.364	0.192	1
STK17B	0.546483	0	0	0.615	0.379	1
BTN3A2	0.545659	0	0	0.428	0.245	1
ISG20	0.54491	0	0	0.575	0.4	1
ACAP1	0.544769	0	0	0.606	0.292	1
ARHGAP30	0.53991	0	0	0.44	0.205	1
ANXA6	0.537932	0	0	0.538	0.325	1
CYBA	0.537571	0	0	0.923	0.748	1
IRF1	0.537258	0	0	0.644	0.485	1
STK10	0.53669	0	0	0.41	0.19	1
SEPTIN1	0.534028	0	0	0.538	0.284	1
ARHGEF1	0.532907	0	0	0.575	0.374	1
LIMD2	0.532699	0	0	0.71	0.469	1
APOBEC3C	0.531414	0	0	0.347	0.177	1
RAB27A	0.531387	0	0	0.346	0.157	1
SRSF7	0.528656	0	0	0.766	0.681	1
TSC22D3	0.527882	0	0	0.753	0.544	1
GPR65	0.527146	0	0	0.328	0.124	1
CD48	0.527056	0	0	0.665	0.345	1
CBLB	0.521252	0	0	0.368	0.187	1
S100A4	0.520047	0	0	0.846	0.53	1
IL10RA	0.518333	0	0	0.434	0.2	1
BTG1	0.517364	0	0	0.952	0.825	1
TRG-AS1	0.513967	0	0	0.251	0.056	1
PSTPIP1	0.51329	0	0	0.368	0.13	1
RNF125	0.513034	0	0	0.329	0.109	1
ZFP36	0.512723	0	0	0.781	0.695	1
CYTOR	0.511949	0	0	0.436	0.241	1
CCND3	0.511925	0	0	0.519	0.378	1
ICAM3	0.510752	0	0	0.544	0.294	1
PIP4K2A	0.510272	0	0	0.428	0.233	1
RASSF1	0.507454	0	0	0.355	0.199	1
TXNIP	0.506387	0	0	0.608	0.502	1
LYST	0.505934	0	0	0.34	0.239	1
PSME1	0.504854	0	0	0.798	0.692	1
SMAD7	0.504561	0	0	0.378	0.203	1
C5orf56	0.503548	0	0	0.336	0.164	1
STAT4	0.500436	0	0	0.336	0.109	1
RAP1B	0.498963	0	0	0.629	0.541	1
DENND2D	0.498419	0	0	0.378	0.224	1
AHNAK	0.497708	0	0	0.531	0.386	1
PTGER4	0.497638	0	0	0.425	0.212	1
FMNL1	0.497224	0	0	0.477	0.275	1
SAMSN1	0.493636	0	0	0.4	0.209	1
ARPC2	0.491511	0	0	0.871	0.772	1
FYB1	0.491178	0	0	0.654	0.352	1
MYH9	0.489073	0	0	0.59	0.487	1
PLEK	0.489039	0	0	0.319	0.129	1
TENT5C	0.488732	0	0	0.389	0.196	1
ARAP2	0.48763	0	0	0.343	0.144	1
PAXX	0.485266	0	0	0.595	0.452	1
STK4	0.481118	0	0	0.624	0.432	1
GMFG	0.480453	0	0	0.685	0.389	1
PSMB10	0.480242	0	0	0.568	0.415	1
RESF1	0.480006	0	0	0.461	0.299	1
PTPN4	0.476051	0	0	0.321	0.156	1
RNF166	0.473106	0	0	0.379	0.212	1
APBB1IP	0.472317	0	0	0.467	0.237	1
TSEN54	0.472008	0	0	0.356	0.203	1
DDIT4	0.471955	0	0	0.54	0.394	1
SASH3	0.471005	0	0	0.366	0.152	1
EMP3	0.468877	0	0	0.69	0.437	1
HCLS1	0.466622	0	0	0.584	0.361	1
VAMP2	0.466407	0	0	0.672	0.536	1
PREX1	0.46633	0	0	0.373	0.184	1
ELF1	0.466303	0	0	0.568	0.415	1
DGKZ	0.464076	0	0	0.398	0.272	1
SLC7A5	0.463499	0	0	0.367	0.241	1
SLFN5	0.461682	0	0	0.371	0.196	1
RHOF	0.461193	0	0	0.442	0.237	1
JMJD6	0.458916	0	0	0.335	0.232	1
CTSC	0.458149	0	0	0.586	0.339	1
TOX	0.458121	0	0	0.26	0.101	1
SH3KBP1	0.457227	0	0	0.444	0.262	1
AC004687.1	0.456766	0	0	0.275	0.103	1
TAP1	0.454041	0	0	0.506	0.366	1
TLN1	0.453003	0	0	0.487	0.376	1
RASSF5	0.452743	0	0	0.417	0.233	1
MBNL1	0.450976	0	0	0.601	0.46	1
CELF2	0.450335	0	0	0.495	0.329	1
ADAM8	0.450011	0	0	0.298	0.124	1
SEPTIN7	0.446696	0	0	0.717	0.598	1
THEMIS	0.44574	0	0	0.261	0.079	1
TRIM22	0.443259	0	0	0.415	0.245	1
PLEKHF1	0.443201	0	0	0.253	0.098	1
MAPRE2	0.443042	0	0	0.372	0.248	1
ARL6IP5	0.4415	0	0	0.657	0.529	1
CYTIP	0.439501	0	0	0.572	0.344	1
LEPROTL1	0.435744	0	0	0.573	0.418	1
OSTF1	0.434841	0	0	0.459	0.34	1
SP100	0.433887	0	0	0.518	0.368	1
WAS	0.430617	0	0	0.443	0.228	1
UTRN	0.428755	0	0	0.373	0.244	1
CNOT6L	0.428646	0	0	0.356	0.221	1
LBH	0.425721	0	0	0.465	0.301	1
PDE4D	0.42324	0	0	0.303	0.146	1
AKAP13	0.422452	0	0	0.54	0.413	1
TRAF3IP3	0.422086	0	0	0.445	0.219	1
PRDM1	0.421378	0	0	0.282	0.128	1
DHRS7	0.421299	0	0	0.482	0.396	1
CSK	0.421177	0	0	0.47	0.339	1
GYPC	0.419021	0	0	0.525	0.302	1
CALM1	0.416971	0	0	0.889	0.802	1
CD6	0.416619	0	0	0.382	0.167	1
SHFL	0.416348	0	0	0.386	0.265	1
IKZF1	0.415995	0	0	0.497	0.263	1
IQGAP2	0.415975	0	0	0.329	0.17	1
EMB	0.413473	0	0	0.408	0.241	1
RNF19A	0.41279	0	0	0.395	0.289	1
GATA3	0.411883	0	0	0.306	0.119	1
CYFIP2	0.409683	0	0	0.388	0.23	1
PPP1CA	0.405806	0	0	0.64	0.568	1
XAF1	0.405013	0	0	0.328	0.196	1
SH3BP1	0.404506	0	0	0.332	0.19	1
DRAP1	0.402324	0	0	0.618	0.543	1
ARHGEF3	0.402224	0	0	0.289	0.142	1
ARF6	0.401979	0	0	0.609	0.545	1
HERPUD2	0.401436	0	0	0.359	0.244	1
RORA	0.400637	0	0	0.355	0.225	1
TAPBP	0.400029	0	0	0.582	0.486	1
PTPRCAP	0.399692	0	0	0.282	0.097	1
PITPNC1	0.399356	0	0	0.334	0.182	1
GLIPR2	0.397692	0	0	0.326	0.165	1
TAGAP	0.395186	0	0	0.424	0.237	1
CDC42SE2	0.395098	0	0	0.426	0.31	1
CEMIP2	0.394676	0	0	0.255	0.146	1
GPSM3	0.393063	0	0	0.633	0.407	1
PNRC1	0.391316	0	0	0.81	0.732	1
FNBP1	0.389547	0	0	0.48	0.336	1
SIGIRR	0.387509	0	0	0.436	0.331	1
DEF6	0.387229	0	0	0.382	0.211	1
DOCK8	0.384117	0	0	0.394	0.225	1
RASGRP1	0.383868	0	0	0.3	0.133	1
CFL1	0.379393	0	0	0.943	0.893	1
SRSF2	0.378838	0	0	0.69	0.655	1
GNAI2	0.375671	0	0	0.573	0.513	1
CRIP1	0.375629	0	0	0.873	0.656	1
SEMA4D	0.374049	0	0	0.344	0.201	1
SLC38A1	0.373964	0	0	0.454	0.35	1
RBM38	0.372188	0	0	0.424	0.312	1
RAB29	0.370243	0	0	0.265	0.144	1
ARPC4	0.369632	0	0	0.528	0.456	1
CARD16	0.36802	0	0	0.384	0.233	1
GIMAP5	0.367008	0	0	0.324	0.148	1
ACTB	0.366345	0	0	0.989	0.971	1
CAP1	0.36606	0	0	0.604	0.54	1
KMT2E	0.365684	0	0	0.604	0.537	1
PPP3CC	0.363513	0	0	0.322	0.191	1
BIN1	0.362717	0	0	0.386	0.254	1
TMSB4X	0.361392	0	0	0.994	0.963	1
CLIC1	0.359478	0	0	0.821	0.731	1
IFI16	0.359403	0	0	0.439	0.322	1
ARHGAP45	0.356566	0	0	0.418	0.259	1
FERMT3	0.355455	0	0	0.361	0.193	1
DDX5	0.354025	0	0	0.92	0.857	1
ITK	0.348485	0	0	0.319	0.126	1
ANKRD44	0.34824	0	0	0.401	0.249	1
KLF6	0.345109	0	0	0.771	0.693	1
PSMB8	0.343762	0	0	0.597	0.526	1
IL16	0.34324	0	0	0.358	0.191	1
RAB8B	0.342421	0	0	0.286	0.169	1
GIMAP1	0.34124	0	0	0.284	0.135	1
SYNE2	0.339122	0	0	0.517	0.392	1
HSPA8	0.338732	0	0	0.858	0.82	1
INPP5D	0.336333	0	0	0.319	0.174	1
RHOH	0.334881	0	0	0.441	0.247	1
CHST11	0.334857	0	0	0.309	0.195	1
ARID5A	0.334619	0	0	0.38	0.256	1
SIT1	0.33362	0	0	0.261	0.128	1
TMC8	0.332169	0	0	0.361	0.198	1
SPOCK2	0.329866	0	0	0.421	0.245	1
UBC	0.329261	0	0	0.926	0.896	1
MBP	0.321833	0	0	0.451	0.291	1
GBP2	0.321091	0	0	0.342	0.215	1
S1PR4	0.320223	0	0	0.274	0.138	1
SRSF5	0.315812	0	0	0.755	0.714	1
PSME2	0.309753	0	0	0.675	0.585	1
ARHGAP25	0.309688	0	0	0.26	0.129	1
ATP8A1	0.309345	0	0	0.268	0.153	1
BST2	0.306137	0	0	0.498	0.348	1
DAZAP2	0.304121	0	0	0.656	0.625	1
UBB	0.301412	0	0	0.914	0.857	1
LPXN	0.299882	0	0	0.321	0.191	1
PRKCB	0.29916	0	0	0.316	0.183	1
CAPZB	0.29834	0	0	0.646	0.609	1
PIK3CD	0.292212	0	0	0.251	0.126	1
BCL11B	0.290778	0	0	0.368	0.234	1
FGD3	0.290284	0	0	0.264	0.132	1
SARAF	0.282131	0	0	0.824	0.74	1
RFTN1	0.274896	0	0	0.251	0.13	1
MAP4K1	0.273871	0	0	0.263	0.148	1
RCSD1	0.273401	0	0	0.337	0.198	1
RPL36AL	0.273395	0	0	0.872	0.83	1
TPM3	0.272494	0	0	0.712	0.665	1
PARVG	0.269043	0	0	0.275	0.154	1
ATP2A3	0.268512	0	0	0.277	0.154	1
BATF	0.264639	0	0	0.267	0.14	1
YWHAZ	0.261614	0	0	0.775	0.742	1
ARHGAP15	0.252407	0	0	0.359	0.216	1
CDC42SE1	0.4229	7.50494e-308	2.53021e-303	0.461	0.38	1
RSRP1	0.368693	2.59253e-296	8.74045e-292	0.537	0.464	1
VPS37B	0.430954	8.64277e-296	2.91382e-291	0.361	0.258	1
ARPC5L	0.388807	8.05191e-292	2.71462e-287	0.474	0.401	1
DIP2A	0.381802	9.86342e-292	3.32535e-287	0.276	0.174	1
DNAJB1	0.456974	5.7077e-291	1.92429e-286	0.648	0.578	1
CD81	0.374929	6.64405e-290	2.23997e-285	0.549	0.496	1
UBE2L6	0.357983	1.57607e-286	5.31355e-282	0.462	0.371	1
KCNAB2	0.300939	5.02302e-282	1.69346e-277	0.276	0.17	1
FAM49B	0.362027	2.30298e-281	7.76428e-277	0.497	0.422	1
CDK17	0.360729	8.78306e-281	2.96112e-276	0.325	0.222	1
SHISA5	0.386553	9.62052e-280	3.24346e-275	0.451	0.381	1
CMTM3	0.31683	1.98966e-279	6.70795e-275	0.315	0.208	1
CD27	0.476575	2.43156e-276	8.19775e-272	0.307	0.194	1
PTK2B	0.277444	3.05805e-276	1.03099e-271	0.256	0.152	1
CCDC88C	0.344211	5.03137e-275	1.69628e-270	0.342	0.239	1
DDX24	0.313674	5.93508e-274	2.00095e-269	0.607	0.564	1
GRK2	0.352814	7.17994e-274	2.42065e-269	0.398	0.302	1
SERPINB9	0.275555	3.97746e-272	1.34096e-267	0.27	0.16	1
IQGAP1	0.375104	2.82038e-271	9.50864e-267	0.516	0.463	1
RBM39	0.253204	1.64289e-270	5.53886e-266	0.728	0.699	1
ZBTB1	0.376189	5.38874e-270	1.81676e-265	0.328	0.229	1
PTP4A2	0.332475	3.60836e-269	1.21652e-264	0.582	0.548	1
CKLF	0.401971	5.15369e-268	1.73752e-263	0.503	0.433	1
NR3C1	0.350707	8.55689e-268	2.88487e-263	0.443	0.352	1
TMEM50A	0.317073	3.56781e-267	1.20285e-262	0.569	0.514	1
PPP1R12A	0.371828	1.35352e-265	4.56325e-261	0.442	0.37	1
EPC1	0.343374	2.40335e-265	8.10264e-261	0.514	0.449	1
SON	0.256526	6.31897e-265	2.13038e-260	0.689	0.665	1
TAP2	0.35941	2.54336e-264	8.57467e-260	0.357	0.261	1
OPTN	0.330061	1.4519e-263	4.89493e-259	0.373	0.276	1
TMC6	0.322942	1.09003e-262	3.67494e-258	0.38	0.28	1
MCL1	0.316538	1.7144e-260	5.77994e-256	0.668	0.634	1
APOL6	0.338203	3.23133e-259	1.08941e-254	0.299	0.201	1
IDS	0.291443	1.01294e-255	3.41502e-251	0.569	0.497	1
ZYX	0.334121	1.68059e-254	5.66595e-250	0.425	0.331	1
IER2	0.296582	6.82532e-254	2.30109e-249	0.723	0.678	1
YPEL5	0.326521	2.63714e-251	8.89086e-247	0.571	0.509	1
GABARAPL1	0.369631	1.15137e-249	3.88173e-245	0.332	0.236	1
NFATC3	0.310968	2.18623e-247	7.37066e-243	0.272	0.178	1
PTPN6	0.360474	2.85607e-243	9.62897e-239	0.378	0.281	1
SIPA1	0.319146	5.63485e-243	1.89973e-238	0.313	0.22	1
RBL2	0.33712	3.20813e-242	1.08159e-237	0.374	0.283	1
TLE5	0.259113	1.27157e-240	4.28698e-236	0.657	0.605	1
SEPTIN9	0.305446	1.40586e-237	4.7397e-233	0.561	0.511	1
TRAPPC10	0.299213	8.8577e-237	2.98628e-232	0.261	0.171	1
RGS2	0.331234	1.29209e-235	4.35616e-231	0.368	0.26	1
GYG1	0.35788	1.06786e-233	3.60017e-229	0.284	0.197	1
ACTR3	0.30141	3.65126e-233	1.23099e-228	0.579	0.547	1
DUSP1	0.408148	2.87986e-231	9.70914e-227	0.716	0.679	1
PRKACB	0.317707	1.4483e-230	4.88281e-226	0.284	0.192	1
LNPEP	0.347423	2.05843e-230	6.93981e-226	0.348	0.263	1
IRF9	0.344312	6.00751e-221	2.02537e-216	0.429	0.349	1
STOM	0.308106	2.59647e-217	8.75373e-213	0.354	0.269	1
RNPEPL1	0.32207	7.98974e-216	2.69366e-211	0.356	0.276	1
CD44	0.259739	9.3554e-214	3.15408e-209	0.602	0.523	1
FOSL2	0.425548	1.2134e-213	4.09085e-209	0.326	0.244	1
WDR1	0.318823	9.42062e-212	3.17607e-207	0.498	0.454	1
FKBP11	0.27258	4.9128e-211	1.6563e-206	0.284	0.19	1
AAK1	0.318182	2.69933e-210	9.10051e-206	0.372	0.288	1
CNN2	0.311779	1.01538e-209	3.42327e-205	0.484	0.408	1
PDIA3	0.258543	2.08728e-207	7.03707e-203	0.624	0.595	1
BRD2	0.32643	1.03459e-204	3.488e-200	0.573	0.546	1
PARP10	0.29222	1.34984e-204	4.55086e-200	0.271	0.186	1
PRMT2	0.381054	7.10372e-204	2.39495e-199	0.436	0.383	1
PDCD4	0.330135	8.4232e-204	2.8398e-199	0.429	0.355	1
JUND	0.342921	7.66408e-203	2.58387e-198	0.676	0.671	1
ZC3HAV1	0.298878	1.4986e-201	5.05238e-197	0.422	0.342	1
CCNH	0.365878	2.29469e-198	7.7363e-194	0.393	0.319	1
TERF2IP	0.309543	1.14213e-196	3.85059e-192	0.515	0.47	1
RGCC	0.377605	1.42671e-195	4.81002e-191	0.46	0.359	1
DIAPH1	0.345512	2.29327e-195	7.73152e-191	0.358	0.29	1
DDX6	0.335022	6.28643e-193	2.11941e-188	0.467	0.418	1
ORAI1	0.336005	1.79804e-191	6.06191e-187	0.333	0.259	1
NCOR1	0.320547	2.26914e-189	7.65016e-185	0.495	0.458	1
TSC22D4	0.272714	3.91788e-189	1.32087e-184	0.381	0.31	1
ZBTB38	0.335178	4.80583e-189	1.62024e-184	0.313	0.237	1
BZW1	0.288619	7.80142e-188	2.63017e-183	0.521	0.488	1
SMCHD1	0.251414	4.63167e-185	1.56152e-180	0.48	0.412	1
CASP1	0.251221	1.63557e-184	5.51416e-180	0.256	0.171	1
HSPA5	0.292778	4.92508e-184	1.66044e-179	0.612	0.587	1
ARID4B	0.286088	2.74587e-180	9.25741e-176	0.53	0.494	1
RNF149	0.292871	8.85262e-180	2.98457e-175	0.414	0.348	1
GNPTAB	0.387457	1.40254e-179	4.72853e-175	0.28	0.21	1
ARHGAP4	0.252436	1.27866e-178	4.31086e-174	0.364	0.278	1
ARHGDIA	0.27138	1.52603e-176	5.14485e-172	0.556	0.543	1
SYTL1	0.320347	6.68063e-175	2.25231e-170	0.353	0.282	1
MAT2B	0.307304	5.28696e-174	1.78245e-169	0.362	0.298	1
CCDC85B	0.291051	4.19825e-172	1.4154e-167	0.491	0.45	1
RHOC	0.26949	4.96295e-172	1.67321e-167	0.416	0.343	1
MXD4	0.348998	2.03022e-170	6.8447e-166	0.308	0.241	1
TRAPPC1	0.275328	9.11862e-169	3.07425e-164	0.536	0.512	1
SYNRG	0.299081	2.49344e-165	8.40638e-161	0.341	0.275	1
TCIRG1	0.284227	8.8343e-165	2.9784e-160	0.334	0.263	1
SP110	0.255713	3.72255e-164	1.25502e-159	0.392	0.312	1
PRPF38B	0.320725	5.17202e-164	1.74369e-159	0.495	0.465	1
ANKRD12	0.262084	2.0987e-162	7.07554e-158	0.539	0.503	1
CTDSP1	0.299459	3.79771e-158	1.28036e-153	0.296	0.229	1
RABGAP1L	0.279008	4.18661e-158	1.41147e-153	0.359	0.294	1
MACF1	0.321116	6.04165e-157	2.03688e-152	0.407	0.354	1
PPP6R1	0.284594	3.37547e-156	1.13801e-151	0.311	0.246	1
CFLAR	0.255394	5.33753e-156	1.7995e-151	0.443	0.388	1
UCP2	0.277264	1.18879e-154	4.00788e-150	0.495	0.442	1
ATP2B4	0.269762	9.86271e-149	3.32511e-144	0.302	0.231	1
LINC-PINT	0.379187	1.38077e-147	4.65512e-143	0.33	0.257	1
CASP8	0.277363	3.59397e-147	1.21167e-142	0.254	0.183	1
TNFRSF14	0.263429	1.75094e-145	5.90312e-141	0.385	0.322	1
IGF2R	0.361636	2.14917e-145	7.2457e-141	0.288	0.23	1
ROCK1	0.302835	1.29488e-144	4.36557e-140	0.431	0.393	1
EIF3G	0.254785	2.11558e-143	7.13245e-139	0.627	0.633	1
PCSK7	0.327525	6.25112e-143	2.1075e-138	0.342	0.281	1
DUSP5	0.329333	1.93999e-142	6.5405e-138	0.288	0.219	1
SMARCA2	0.262929	3.13473e-141	1.05684e-136	0.336	0.27	1
B3GNT2	0.313952	7.74942e-141	2.61264e-136	0.262	0.199	1
RNF167	0.322684	1.18609e-140	3.99877e-136	0.388	0.349	1
TCF25	0.285711	1.67607e-138	5.6507e-134	0.534	0.531	1
CLK1	0.289526	2.93284e-136	9.88778e-132	0.443	0.404	1
MYADM	0.338635	2.11565e-135	7.13271e-131	0.415	0.35	1
REST	0.258644	2.03145e-134	6.84884e-130	0.304	0.241	1
ZBTB7A	0.308735	2.74937e-132	9.26924e-128	0.354	0.308	1
KMT2A	0.292611	6.73684e-130	2.27126e-125	0.439	0.401	1
CASP4	0.276577	7.79763e-129	2.62889e-124	0.355	0.3	1
MAPK1	0.322627	9.07124e-129	3.05828e-124	0.313	0.264	1
CYTH1	0.265538	2.67142e-128	9.00643e-124	0.352	0.292	1
REL	0.270451	1.06444e-127	3.58867e-123	0.415	0.358	1
LASP1	0.290634	2.52179e-126	8.50196e-122	0.315	0.263	1
COTL1	0.312704	1.69215e-122	5.70492e-118	0.556	0.529	1
CHIC2	0.257504	4.04994e-121	1.3654e-116	0.296	0.239	1
TC2N	0.259207	2.60795e-118	8.79244e-114	0.267	0.203	1
CCDC12	0.302393	3.58988e-118	1.21029e-113	0.409	0.381	1
G3BP2	0.279531	1.02348e-115	3.45055e-111	0.435	0.406	1
ZNF331	0.333552	1.96025e-113	6.60878e-109	0.374	0.316	1
CD164	0.259278	8.7459e-113	2.94859e-108	0.488	0.478	1
N4BP1	0.267912	6.27905e-112	2.11692e-107	0.254	0.199	1
JUN	0.336109	8.66718e-110	2.92205e-105	0.743	0.748	1
CCNDBP1	0.281066	1.01991e-109	3.43851e-105	0.344	0.3	1
DNAJB6	0.294825	1.18582e-109	3.99788e-105	0.526	0.528	1
DNAJC1	0.275091	5.00812e-109	1.68844e-104	0.345	0.303	1
C9orf78	0.284325	7.9478e-108	2.67952e-103	0.429	0.409	1
TSPYL2	0.288772	2.29554e-107	7.73917e-103	0.315	0.257	1
CITED2	0.331208	3.115e-106	1.05019e-101	0.416	0.374	1
PKN1	0.260409	7.63855e-104	2.57526e-99	0.345	0.306	1
CDK13	0.270394	7.0134e-102	2.3645e-97	0.319	0.274	1
CSRNP1	0.307841	1.75688e-100	5.92315e-96	0.421	0.383	1
CDK2AP2	0.289416	1.02563e-99	3.4578e-95	0.398	0.374	1
RALGAPA1	0.281763	2.67259e-99	9.01037e-95	0.291	0.243	1
IRF2	0.256983	1.79585e-97	6.05454e-93	0.294	0.248	1
SSBP4	0.252866	4.01041e-95	1.35207e-90	0.367	0.33	1
BAX	0.290137	1.30974e-94	4.41565e-90	0.479	0.476	1
SOCS1	0.257677	1.37093e-93	4.62195e-89	0.309	0.256	1
ZNF800	0.259854	1.87323e-93	6.31542e-89	0.307	0.266	1
ITM2C	0.487224	7.92432e-87	2.67161e-82	0.279	0.241	1
TMX4	0.262519	7.42421e-84	2.503e-79	0.34	0.303	1
POLR3GL	0.270075	1.57632e-80	5.31441e-76	0.34	0.314	1
AC020916.1	0.291589	6.87196e-68	2.31681e-63	0.333	0.296	1
IGFLR1	0.250636	5.93338e-60	2.00038e-55	0.287	0.251	1
UBE2F	0.308866	6.72437e-57	2.26705e-52	0.279	0.261	1
MRPL10	0.267383	1.03454e-56	3.48785e-52	0.253	0.228	1
PHLDA1	0.267748	1.63447e-46	5.51045e-42	0.256	0.221	1
PMAIP1	0.406192	7.75144e-46	2.61332e-41	0.353	0.341	1
STAT1	0.25279	9.62307e-43	3.24432e-38	0.372	0.361	1
IFRD1	0.266924	1.50461e-31	5.07263e-27	0.36	0.367	1
PLAC8	0.265824	3.47883e-19	1.17285e-14	0.28	0.276	1
MX1	0.253189	3.13375e-17	1.05651e-12	0.255	0.243	1
NEU1	0.270138	3.73976e-09	0.000126082	0.292	0.311	1
LGALS7B	2.2443	0	0	0.384	0.051	2
AVP	1.87436	0	0	0.362	0.023	2
CHGA	1.82081	0	0	0.551	0.031	2
IGF2	1.81874	0	0	0.445	0.039	2
MAP1B	1.81616	0	0	0.633	0.091	2
LGALS7	1.74056	0	0	0.335	0.018	2
STMN1	1.73601	0	0	0.843	0.304	2
RBP1	1.72769	0	0	0.614	0.1	2
INSM1	1.58995	0	0	0.541	0.038	2
CKB	1.58904	0	0	0.917	0.184	2
SEC11C	1.4887	0	0	0.807	0.345	2
APLP1	1.43948	0	0	0.459	0.042	2
BEX1	1.38107	0	0	0.633	0.052	2
TUBA1A	1.37291	0	0	0.857	0.496	2
MEG3	1.34649	0	0	0.372	0.048	2
HMGN2	1.33376	0	0	0.955	0.679	2
HES6	1.2931	0	0	0.729	0.101	2
SPINT2	1.26294	0	0	0.918	0.348	2
CALB2	1.24897	0	0	0.4	0.023	2
SCG5	1.23564	0	0	0.518	0.04	2
MARCKSL1	1.20254	0	0	0.848	0.373	2
TUBB2B	1.20203	0	0	0.61	0.055	2
EEF1A2	1.19698	0	0	0.495	0.049	2
TUBB	1.19439	0	0	0.919	0.557	2
TUBB3	1.19345	0	0	0.637	0.107	2
UCHL1	1.18423	0	0	0.606	0.069	2
MDK	1.17396	0	0	0.893	0.215	2
CPE	1.16328	0	0	0.668	0.093	2
PEG10	1.15789	0	0	0.573	0.071	2
BEX3	1.14098	0	0	0.865	0.275	2
ID4	1.12083	0	0	0.63	0.108	2
CRABP1	1.09588	0	0	0.393	0.032	2
BASP1	1.08878	0	0	0.587	0.188	2
PCP4	1.07434	0	0	0.251	0.027	2
SOX9	1.06023	0	0	0.685	0.079	2
SOX4	1.05913	0	0	0.835	0.23	2
CDKN1C	1.05422	0	0	0.551	0.104	2
GRP	1.05275	0	0	0.275	0.021	2
CDKN2A	1.04812	0	0	0.739	0.152	2
NFIB	1.04098	0	0	0.65	0.127	2
H3F3A	1.03162	0	0	0.995	0.879	2
H1FX	0.999721	0	0	0.802	0.433	2
TBCB	0.986425	0	0	0.794	0.435	2
CDKN2C	0.985872	0	0	0.689	0.102	2
ARC	0.97873	0	0	0.399	0.035	2
GNG8	0.973899	0	0	0.331	0.021	2
PTMS	0.956084	0	0	0.928	0.335	2
ATF5	0.953	0	0	0.459	0.162	2
PAFAH1B3	0.950268	0	0	0.78	0.221	2
ASCL1	0.940352	0	0	0.297	0.024	2
NRARP	0.939589	0	0	0.436	0.092	2
CLDN4	0.937087	0	0	0.894	0.175	2
ZNF428	0.925617	0	0	0.825	0.341	2
CLDN3	0.916379	0	0	0.606	0.115	2
NASP	0.914199	0	0	0.75	0.349	2
EPCAM	0.9138	0	0	0.875	0.165	2
MEST	0.898117	0	0	0.702	0.119	2
PAM	0.896033	0	0	0.504	0.135	2
SCG3	0.890626	0	0	0.574	0.038	2
FNBP1L	0.882721	0	0	0.635	0.106	2
DEK	0.874086	0	0	0.833	0.49	2
TCF4	0.872746	0	0	0.753	0.173	2
TUBA1B	0.86203	0	0	0.96	0.649	2
KIF1A	0.853732	0	0	0.577	0.045	2
GPRC5B	0.853157	0	0	0.507	0.045	2
PSIP1	0.85088	0	0	0.743	0.363	2
BEX2	0.849377	0	0	0.713	0.17	2
HSPA2	0.847446	0	0	0.424	0.089	2
CNN3	0.846111	0	0	0.608	0.135	2
NRXN1	0.844947	0	0	0.542	0.037	2
KIF5C	0.830519	0	0	0.642	0.065	2
TUBB4B	0.818334	0	0	0.866	0.496	2
NPDC1	0.816519	0	0	0.751	0.138	2
RASD1	0.816436	0	0	0.515	0.07	2
CRMP1	0.810894	0	0	0.541	0.036	2
WFDC2	0.810115	0	0	0.802	0.136	2
CFAP298	0.807514	0	0	0.712	0.247	2
SRP9	0.805702	0	0	0.879	0.494	2
CLIP3	0.805226	0	0	0.349	0.036	2
APP	0.802409	0	0	0.804	0.254	2
TAGLN3	0.801457	0	0	0.35	0.028	2
DEGS1	0.798983	0	0	0.529	0.265	2
CRIP2	0.790797	0	0	0.733	0.164	2
TMSB15A	0.790171	0	0	0.492	0.036	2
CENPV	0.782505	0	0	0.636	0.115	2
RTN1	0.782243	0	0	0.485	0.047	2
KCNQ1OT1	0.776077	0	0	0.605	0.16	2
MCM7	0.77452	0	0	0.605	0.165	2
ELAVL3	0.773176	0	0	0.476	0.036	2
ANKRD65	0.771085	0	0	0.544	0.072	2
GTF2I	0.766927	0	0	0.823	0.339	2
RBBP4	0.76599	0	0	0.742	0.357	2
PCSK1N	0.763909	0	0	0.591	0.095	2
CLSTN2	0.762625	0	0	0.423	0.024	2
NUCKS1	0.762485	0	0	0.883	0.506	2
TCEAL9	0.75597	0	0	0.644	0.161	2
RTL8A	0.750209	0	0	0.737	0.188	2
PRDX2	0.749129	0	0	0.941	0.462	2
SOX2	0.746319	0	0	0.436	0.072	2
ENAH	0.738577	0	0	0.691	0.128	2
CBX1	0.738309	0	0	0.695	0.204	2
AC055839.2	0.735387	0	0	0.372	0.037	2
PFN2	0.73378	0	0	0.661	0.129	2
TP73	0.730885	0	0	0.389	0.035	2
GNG4	0.730456	0	0	0.536	0.052	2
TSC22D1	0.727459	0	0	0.728	0.205	2
EYA2	0.725106	0	0	0.453	0.046	2
IGFBP2	0.723858	0	0	0.606	0.138	2
TYMS	0.722914	0	0	0.49	0.091	2
HMGB3	0.72058	0	0	0.686	0.159	2
ZBTB20	0.715752	0	0	0.662	0.259	2
OLFM1	0.715042	0	0	0.438	0.041	2
AL354766.2	0.706383	0	0	0.329	0.017	2
RASSF6	0.70493	0	0	0.441	0.064	2
USP1	0.701588	0	0	0.652	0.222	2
PRDX1	0.700406	0	0	0.893	0.594	2
POLR2I	0.699527	0	0	0.811	0.343	2
CXADR	0.697339	0	0	0.661	0.111	2
BTBD17	0.689578	0	0	0.4	0.013	2
CAMK2N1	0.689547	0	0	0.422	0.094	2
E2F1	0.688954	0	0	0.417	0.051	2
CD24	0.688508	0	0	0.765	0.192	2
TTC3	0.688073	0	0	0.812	0.372	2
PCNA	0.687828	0	0	0.612	0.208	2
RAB26	0.685486	0	0	0.34	0.02	2
PARP1	0.685067	0	0	0.804	0.37	2
NONO	0.680928	0	0	0.891	0.435	2
CNTNAP2	0.672688	0	0	0.514	0.043	2
SNRPE	0.664722	0	0	0.944	0.434	2
SEZ6L2	0.662842	0	0	0.551	0.076	2
OTULINL	0.659888	0	0	0.541	0.133	2
HTATSF1	0.659261	0	0	0.678	0.242	2
CADM1	0.658859	0	0	0.544	0.085	2
YWHAE	0.656853	0	0	0.905	0.447	2
CHGB	0.655607	0	0	0.432	0.023	2
TCEAL2	0.653803	0	0	0.428	0.038	2
CLSTN1	0.653757	0	0	0.629	0.215	2
CDK2AP1	0.653087	0	0	0.698	0.206	2
HNRNPR	0.650824	0	0	0.795	0.414	2
DCX	0.650007	0	0	0.336	0.02	2
GNAS	0.649818	0	0	0.906	0.679	2
NEUROD1	0.648155	0	0	0.292	0.014	2
CTXN1	0.646977	0	0	0.521	0.061	2
PSMD8	0.644305	0	0	0.857	0.494	2
ENO2	0.643066	0	0	0.556	0.138	2
KDM1A	0.641732	0	0	0.569	0.16	2
FAM110A	0.639843	0	0	0.447	0.14	2
PGF	0.638854	0	0	0.469	0.045	2
RTN3	0.638402	0	0	0.765	0.289	2
WDR34	0.633125	0	0	0.59	0.142	2
ECI1	0.632072	0	0	0.655	0.205	2
PPP1R1B	0.631759	0	0	0.371	0.047	2
RFC4	0.631419	0	0	0.531	0.106	2
CACNA2D1	0.630266	0	0	0.475	0.04	2
BMP7	0.62918	0	0	0.34	0.032	2
LSM4	0.628476	0	0	0.863	0.381	2
NDUFB4	0.626148	0	0	0.944	0.535	2
VWA1	0.624851	0	0	0.486	0.088	2
PAQR4	0.623598	0	0	0.467	0.064	2
CENPX	0.623516	0	0	0.759	0.294	2
LPGAT1	0.622986	0	0	0.646	0.192	2
KRT15	0.62269	0	0	0.279	0.084	2
MT-ATP6	0.620098	0	0	0.99	0.924	2
ZIC2	0.618928	0	0	0.464	0.035	2
ASS1	0.616758	0	0	0.387	0.075	2
NHLH1	0.614129	0	0	0.313	0.014	2
PEBP1	0.613922	0	0	0.951	0.566	2
FXYD6	0.613567	0	0	0.516	0.063	2
LMNB1	0.6095	0	0	0.497	0.148	2
CCT5	0.606584	0	0	0.828	0.371	2
NXPH4	0.604233	0	0	0.388	0.042	2
NDUFS6	0.602369	0	0	0.916	0.449	2
PLPP2	0.601288	0	0	0.687	0.122	2
MCM2	0.598792	0	0	0.455	0.067	2
ATP2C1	0.597769	0	0	0.561	0.164	2
MT3	0.597316	0	0	0.376	0.041	2
BNIP3	0.595775	0	0	0.668	0.228	2
CHRNA3	0.593745	0	0	0.318	0.014	2
CSNK1E	0.593561	0	0	0.668	0.203	2
EDIL3	0.593113	0	0	0.329	0.03	2
H1F0	0.592936	0	0	0.582	0.173	2
NKX2-1	0.592127	0	0	0.541	0.081	2
H2AFZ	0.59101	0	0	0.947	0.637	2
MAP3K13	0.590642	0	0	0.708	0.23	2
SET	0.588684	0	0	0.935	0.596	2
SELENOW	0.586931	0	0	0.815	0.507	2
RABL6	0.584667	0	0	0.672	0.262	2
ATP1B1	0.584015	0	0	0.736	0.199	2
MAGEF1	0.583874	0	0	0.669	0.17	2
BEX4	0.583869	0	0	0.595	0.189	2
CACNA1A	0.583643	0	0	0.408	0.031	2
SLC25A5	0.582998	0	0	0.954	0.638	2
UBE2T	0.578306	0	0	0.478	0.102	2
FAM210B	0.574743	0	0	0.58	0.156	2
PPP1R14B	0.572197	0	0	0.805	0.32	2
PIK3R3	0.571613	0	0	0.517	0.084	2
GADD45G	0.56942	0	0	0.442	0.141	2
PODXL2	0.567805	0	0	0.605	0.09	2
TTLL7	0.567288	0	0	0.485	0.056	2
ACYP1	0.566666	0	0	0.551	0.128	2
KCNMA1	0.56612	0	0	0.402	0.054	2
BTG3	0.565006	0	0	0.633	0.259	2
GDI1	0.564955	0	0	0.654	0.302	2
CLSPN	0.564716	0	0	0.416	0.065	2
SNHG7	0.56391	0	0	0.839	0.403	2
RNF187	0.563557	0	0	0.746	0.332	2
ENC1	0.562878	0	0	0.444	0.1	2
CRLF1	0.562719	0	0	0.305	0.032	2
MAZ	0.562248	0	0	0.68	0.33	2
ASRGL1	0.562133	0	0	0.506	0.087	2
NPW	0.55876	0	0	0.391	0.042	2
DSP	0.55816	0	0	0.524	0.129	2
SLC25A6	0.557626	0	0	0.954	0.789	2
CYB5A	0.556544	0	0	0.784	0.297	2
LAGE3	0.555152	0	0	0.728	0.295	2
PTPRF	0.554763	0	0	0.616	0.126	2
SOX11	0.554739	0	0	0.367	0.032	2
VGF	0.5509	0	0	0.319	0.019	2
KLHL24	0.550318	0	0	0.606	0.212	2
CBFA2T2	0.549932	0	0	0.528	0.125	2
ATP6V0B	0.549916	0	0	0.895	0.478	2
KRT18	0.54967	0	0	0.764	0.244	2
UNCX	0.549513	0	0	0.265	0.01	2
LY6H	0.547056	0	0	0.346	0.018	2
RCN2	0.546283	0	0	0.809	0.317	2
LMO2	0.546034	0	0	0.39	0.071	2
PDCD5	0.545806	0	0	0.856	0.373	2
PDCD6	0.545213	0	0	0.892	0.45	2
SIVA1	0.544132	0	0	0.822	0.426	2
CBX4	0.543972	0	0	0.457	0.221	2
MAD2L2	0.543676	0	0	0.612	0.222	2
DPYSL3	0.542342	0	0	0.483	0.063	2
NUSAP1	0.541273	0	0	0.457	0.088	2
CCP110	0.540228	0	0	0.498	0.095	2
NAV1	0.539067	0	0	0.451	0.072	2
HNRNPL	0.539064	0	0	0.598	0.402	2
DBN1	0.539003	0	0	0.535	0.098	2
HES1	0.53795	0	0	0.486	0.159	2
NDUFB10	0.5377	0	0	0.905	0.49	2
TMEM97	0.536901	0	0	0.546	0.105	2
PGRMC1	0.535763	0	0	0.681	0.215	2
PTN	0.532671	0	0	0.307	0.043	2
TUSC1	0.532352	0	0	0.465	0.06	2
ATRX	0.531825	0	0	0.771	0.43	2
DUT	0.528709	0	0	0.788	0.415	2
SMC1A	0.528399	0	0	0.588	0.222	2
UQCRH	0.527869	0	0	0.98	0.681	2
ECH1	0.52567	0	0	0.672	0.44	2
NREP	0.52436	0	0	0.475	0.074	2
MCM3	0.524232	0	0	0.528	0.162	2
SLC35F3	0.52373	0	0	0.325	0.022	2
MYL6B	0.523185	0	0	0.707	0.185	2
RPAIN	0.522938	0	0	0.737	0.276	2
UBE2S	0.52286	0	0	0.731	0.406	2
ENSA	0.5226	0	0	0.888	0.476	2
HSBP1	0.522459	0	0	0.908	0.394	2
KIT	0.521484	0	0	0.501	0.045	2
KLK11	0.521473	0	0	0.355	0.03	2
DACH1	0.521022	0	0	0.432	0.028	2
ELF3	0.520251	0	0	0.46	0.162	2
MYT1L	0.519395	0	0	0.307	0.014	2
USP22	0.518949	0	0	0.725	0.274	2
MT-ND1	0.518721	0	0	0.979	0.893	2
HDGFL3	0.518086	0	0	0.554	0.105	2
BRD3	0.516756	0	0	0.597	0.167	2
TFDP2	0.51673	0	0	0.63	0.2	2
HCFC1R1	0.516536	0	0	0.614	0.257	2
HLTF	0.515684	0	0	0.542	0.13	2
ACTL6A	0.515233	0	0	0.62	0.179	2
NME2	0.514359	0	0	0.933	0.705	2
MT-CO3	0.513967	0	0	0.988	0.933	2
TMEM59L	0.513345	0	0	0.325	0.021	2
VBP1	0.512743	0	0	0.705	0.26	2
TCTEX1D2	0.512521	0	0	0.569	0.144	2
PRXL2A	0.511897	0	0	0.65	0.155	2
SUMO2	0.510363	0	0	0.986	0.77	2
PSMC4	0.510252	0	0	0.661	0.324	2
COL9A3	0.509123	0	0	0.306	0.037	2
CAMTA1	0.508951	0	0	0.773	0.327	2
CENPF	0.508818	0	0	0.378	0.086	2
HDGF	0.508802	0	0	0.718	0.298	2
PSMD2	0.50814	0	0	0.723	0.333	2
SMC3	0.507385	0	0	0.68	0.277	2
ACTL6B	0.507237	0	0	0.373	0.017	2
PHPT1	0.50719	0	0	0.78	0.41	2
MYBL2	0.507052	0	0	0.393	0.058	2
RGS16	0.506299	0	0	0.429	0.126	2
MRPS26	0.505543	0	0	0.755	0.27	2
SRSF10	0.504374	0	0	0.793	0.422	2
MLF1	0.503835	0	0	0.522	0.13	2
TSPAN7	0.503686	0	0	0.34	0.028	2
UBE2E3	0.503549	0	0	0.714	0.275	2
SYNC	0.503037	0	0	0.531	0.157	2
LAPTM4B	0.502031	0	0	0.532	0.138	2
LSR	0.501259	0	0	0.61	0.207	2
TLE2	0.501037	0	0	0.419	0.071	2
MSI2	0.500746	0	0	0.719	0.208	2
RBM42	0.499929	0	0	0.564	0.274	2
CARHSP1	0.499275	0	0	0.652	0.283	2
ERRFI1	0.49884	0	0	0.499	0.131	2
TOMM40	0.498815	0	0	0.687	0.239	2
ELOB	0.498549	0	0	0.968	0.691	2
TOP2A	0.498385	0	0	0.346	0.075	2
UBA2	0.496378	0	0	0.7	0.313	2
GINS2	0.495787	0	0	0.455	0.062	2
SINHCAF	0.494398	0	0	0.658	0.221	2
ZNF326	0.494342	0	0	0.631	0.185	2
CEP170	0.493499	0	0	0.542	0.156	2
ZNF503	0.493484	0	0	0.433	0.084	2
NGRN	0.492249	0	0	0.802	0.329	2
MSH6	0.49194	0	0	0.501	0.12	2
CNIH2	0.49104	0	0	0.373	0.031	2
POLR2H	0.488892	0	0	0.733	0.263	2
ILF2	0.488558	0	0	0.775	0.415	2
CYP51A1	0.488498	0	0	0.586	0.172	2
NDUFAB1	0.487932	0	0	0.877	0.422	2
SNRPB	0.487081	0	0	0.888	0.559	2
TSPAN3	0.486831	0	0	0.722	0.237	2
HNRNPU	0.486786	0	0	0.913	0.629	2
ATP5MC1	0.486556	0	0	0.858	0.394	2
FBL	0.486324	0	0	0.792	0.427	2
NNT-AS1	0.486311	0	0	0.531	0.12	2
EGR1	0.485699	0	0	0.637	0.325	2
UBAC1	0.484768	0	0	0.628	0.187	2
PRKDC	0.482976	0	0	0.66	0.283	2
TCEAL4	0.482863	0	0	0.71	0.218	2
RPRM	0.481058	0	0	0.364	0.023	2
SERBP1	0.479907	0	0	0.951	0.589	2
FGFR3	0.479599	0	0	0.373	0.048	2
VKORC1	0.479564	0	0	0.762	0.33	2
HACD3	0.479292	0	0	0.672	0.202	2
NFIC	0.478777	0	0	0.647	0.236	2
SEPTIN11	0.477997	0	0	0.553	0.193	2
SEMA6A	0.477382	0	0	0.366	0.051	2
IRF2BPL	0.476153	0	0	0.498	0.2	2
HELLS	0.474321	0	0	0.478	0.095	2
SEZ6L	0.474281	0	0	0.348	0.019	2
CUTA	0.472914	0	0	0.937	0.572	2
PGM2L1	0.47267	0	0	0.347	0.133	2
NDUFB11	0.47253	0	0	0.915	0.612	2
SYNE2	0.472048	0	0	0.757	0.369	2
HNRNPAB	0.47187	0	0	0.752	0.357	2
NDUFC2	0.471378	0	0	0.909	0.497	2
APEX1	0.471284	0	0	0.847	0.374	2
MCM4	0.471221	0	0	0.471	0.09	2
RTL8C	0.471221	0	0	0.639	0.217	2
RTN2	0.470022	0	0	0.384	0.05	2
SNRPD1	0.468454	0	0	0.876	0.425	2
NDUFS5	0.468427	0	0	0.973	0.663	2
ELAVL4	0.467999	0	0	0.287	0.021	2
SLC25A36	0.467517	0	0	0.677	0.248	2
GGCT	0.467245	0	0	0.686	0.231	2
LHX2	0.466922	0	0	0.354	0.024	2
PTMA	0.466872	0	0	0.998	0.968	2
ZMYND19	0.466592	0	0	0.435	0.096	2
NPTX2	0.466243	0	0	0.358	0.025	2
DDAH2	0.465886	0	0	0.552	0.232	2
ELN	0.464874	0	0	0.368	0.032	2
CAMK2B	0.464134	0	0	0.424	0.026	2
PXMP2	0.463675	0	0	0.544	0.118	2
SRP14	0.462851	0	0	0.986	0.814	2
GLRX5	0.462324	0	0	0.731	0.271	2
SRSF11	0.460513	0	0	0.848	0.516	2
YIF1B	0.460355	0	0	0.473	0.204	2
RHEB	0.460236	0	0	0.828	0.402	2
AUTS2	0.459888	0	0	0.517	0.147	2
TUSC3	0.459745	0	0	0.485	0.088	2
RAB3IP	0.459646	0	0	0.6	0.138	2
SSNA1	0.459376	0	0	0.782	0.384	2
GAA	0.458482	0	0	0.488	0.164	2
XRCC5	0.457724	0	0	0.818	0.465	2
SPTBN4	0.457312	0	0	0.327	0.019	2
PCSK1	0.456837	0	0	0.373	0.022	2
ATP1A3	0.456812	0	0	0.324	0.034	2
PTTG1	0.456801	0	0	0.504	0.178	2
TCEAL3	0.456624	0	0	0.536	0.141	2
PSMB2	0.45549	0	0	0.812	0.4	2
SYP	0.455309	0	0	0.417	0.034	2
LUC7L3	0.455166	0	0	0.82	0.369	2
TMPO	0.453937	0	0	0.632	0.279	2
CHD7	0.453584	0	0	0.553	0.166	2
SYT5	0.452466	0	0	0.313	0.024	2
HNRNPA2B1	0.451586	0	0	0.947	0.788	2
SNRPD2	0.451155	0	0	0.931	0.724	2
SIX1	0.451129	0	0	0.412	0.059	2
MARCH6	0.449838	0	0	0.707	0.27	2
PPP1R37	0.449429	0	0	0.455	0.11	2
LMO4	0.449376	0	0	0.485	0.205	2
CDK4	0.449293	0	0	0.753	0.25	2
HIST1H4C	0.449267	0	0	0.714	0.419	2
NSMF	0.449137	0	0	0.419	0.108	2
AGPAT2	0.44798	0	0	0.592	0.215	2
ADCYAP1	0.447676	0	0	0.334	0.019	2
MGLL	0.447475	0	0	0.443	0.127	2
DCTPP1	0.447462	0	0	0.645	0.203	2
C3orf14	0.446637	0	0	0.502	0.116	2
COX6A1	0.445428	0	0	0.979	0.72	2
FAF1	0.443765	0	0	0.582	0.197	2
DKC1	0.443656	0	0	0.637	0.196	2
ERI3	0.443415	0	0	0.61	0.194	2
NUDT14	0.442979	0	0	0.676	0.188	2
SVBP	0.44274	0	0	0.618	0.215	2
NFIA	0.442683	0	0	0.577	0.142	2
SFPQ	0.44073	0	0	0.849	0.58	2
CHCHD2	0.440687	0	0	0.989	0.792	2
ANAPC11	0.440469	0	0	0.915	0.482	2
TXN	0.440066	0	0	0.978	0.572	2
YPEL3	0.439921	0	0	0.63	0.394	2
ID3	0.439574	0	0	0.479	0.208	2
PHC2	0.439082	0	0	0.546	0.174	2
RAB3B	0.439023	0	0	0.344	0.023	2
UNG	0.437631	0	0	0.465	0.107	2
PDLIM1	0.437361	0	0	0.707	0.24	2
SERTAD4	0.436866	0	0	0.391	0.044	2
GMNN	0.436672	0	0	0.504	0.116	2
NME1	0.435763	0	0	0.796	0.296	2
STMN3	0.435663	0	0	0.486	0.126	2
KCNQ2	0.435645	0	0	0.321	0.014	2
ALYREF	0.43517	0	0	0.512	0.275	2
NUDC	0.434606	0	0	0.824	0.397	2
H2AFV	0.433953	0	0	0.791	0.502	2
MTCH1	0.433246	0	0	0.826	0.409	2
ZFAS1	0.43308	0	0	0.922	0.705	2
TMEFF1	0.432711	0	0	0.388	0.033	2
L1CAM	0.431965	0	0	0.343	0.026	2
FAM83G	0.431734	0	0	0.296	0.05	2
NRCAM	0.430284	0	0	0.365	0.03	2
RSRC1	0.429912	0	0	0.618	0.216	2
ARPC1A	0.429566	0	0	0.79	0.289	2
PCLO	0.428765	0	0	0.422	0.049	2
TMEM9	0.428611	0	0	0.568	0.166	2
RERE	0.428568	0	0	0.607	0.228	2
RAB25	0.428494	0	0	0.694	0.144	2
NT5DC2	0.428398	0	0	0.449	0.092	2
RPL39L	0.428077	0	0	0.489	0.131	2
MAP2	0.427445	0	0	0.364	0.037	2
KHDRBS1	0.426819	0	0	0.869	0.507	2
UHRF1	0.426651	0	0	0.362	0.051	2
HMGB2	0.426257	0	0	0.717	0.427	2
EFNB1	0.426051	0	0	0.377	0.061	2
MORF4L2	0.425451	0	0	0.769	0.324	2
H2AFY	0.424287	0	0	0.792	0.417	2
PPP5C	0.423081	0	0	0.488	0.16	2
SMC2	0.422511	0	0	0.465	0.121	2
HNRNPD	0.422339	0	0	0.812	0.466	2
C19orf48	0.422202	0	0	0.642	0.174	2
GSK3A	0.422195	0	0	0.493	0.195	2
GPI	0.421385	0	0	0.676	0.385	2
SLC22A17	0.420313	0	0	0.37	0.051	2
DDR1	0.4199	0	0	0.56	0.127	2
PARK7	0.419669	0	0	0.953	0.602	2
CELSR2	0.41966	0	0	0.371	0.05	2
DNMT1	0.419322	0	0	0.622	0.288	2
SCHIP1	0.418794	0	0	0.316	0.024	2
ATF3	0.418504	0	0	0.691	0.272	2
ISYNA1	0.418275	0	0	0.515	0.114	2
PNN	0.4181	0	0	0.801	0.399	2
BSCL2	0.417757	0	0	0.554	0.202	2
SUPT16H	0.417733	0	0	0.617	0.25	2
CCDC34	0.417575	0	0	0.46	0.108	2
ARHGAP33	0.417512	0	0	0.317	0.043	2
SAMD1	0.41706	0	0	0.458	0.135	2
DESI2	0.416972	0	0	0.58	0.197	2
SNAP25	0.416845	0	0	0.39	0.024	2
GCLC	0.416525	0	0	0.42	0.137	2
MANEAL	0.416093	0	0	0.393	0.042	2
SMARCA1	0.415921	0	0	0.433	0.071	2
PRRT2	0.415906	0	0	0.293	0.024	2
MAGED1	0.415765	0	0	0.513	0.148	2
HPRT1	0.415675	0	0	0.611	0.239	2
PAF1	0.415423	0	0	0.488	0.221	2
HMGN3	0.414963	0	0	0.847	0.437	2
FEN1	0.41496	0	0	0.436	0.095	2
MEX3A	0.414781	0	0	0.381	0.048	2
NENF	0.41464	0	0	0.783	0.36	2
DYNLT1	0.414478	0	0	0.763	0.347	2
TRAPPC3	0.41393	0	0	0.725	0.306	2
SSBP3	0.413224	0	0	0.544	0.16	2
ZNF462	0.412954	0	0	0.41	0.053	2
GSK3B	0.412857	0	0	0.568	0.232	2
CTNNA1	0.412484	0	0	0.612	0.236	2
HNRNPUL1	0.412443	0	0	0.703	0.414	2
CASTOR2	0.412208	0	0	0.39	0.098	2
PLCG2	0.411704	0	0	0.303	0.14	2
SEM1	0.411504	0	0	0.924	0.543	2
PHGDH	0.411398	0	0	0.437	0.1	2
COX6B1	0.411079	0	0	0.958	0.721	2
PMEPA1	0.409563	0	0	0.48	0.198	2
BAZ1B	0.408598	0	0	0.644	0.269	2
PALM	0.407857	0	0	0.356	0.039	2
RCN1	0.407663	0	0	0.491	0.162	2
ICA1	0.406308	0	0	0.461	0.107	2
CBX5	0.405508	0	0	0.591	0.208	2
CLPTM1L	0.405425	0	0	0.599	0.232	2
KLHDC3	0.405221	0	0	0.587	0.205	2
EPHB2	0.405005	0	0	0.33	0.05	2
CLTA	0.403302	0	0	0.906	0.476	2
EID2	0.402957	0	0	0.395	0.105	2
SFTA3	0.402432	0	0	0.406	0.074	2
CSRP1	0.402392	0	0	0.542	0.229	2
GADD45A	0.402351	0	0	0.596	0.221	2
PAGR1	0.402275	0	0	0.583	0.215	2
ATP5PF	0.402091	0	0	0.947	0.566	2
TMEM54	0.402051	0	0	0.488	0.113	2
SBK1	0.402038	0	0	0.412	0.059	2
RETREG1	0.40179	0	0	0.495	0.125	2
HIST1H1C	0.401341	0	0	0.537	0.264	2
FGGY	0.401034	0	0	0.323	0.087	2
RPL7A	0.400907	0	0	0.997	0.942	2
ZNF737	0.400844	0	0	0.376	0.07	2
RAB3C	0.400814	0	0	0.296	0.026	2
TMEM145	0.400197	0	0	0.336	0.02	2
RIMKLA	0.399676	0	0	0.405	0.035	2
GMPS	0.39954	0	0	0.555	0.201	2
HP1BP3	0.399487	0	0	0.739	0.437	2
MAP1LC3A	0.399223	0	0	0.585	0.172	2
NOTCH1	0.399163	0	0	0.353	0.105	2
TOX3	0.398691	0	0	0.375	0.041	2
PAIP1	0.398461	0	0	0.675	0.26	2
MAN1A2	0.398362	0	0	0.57	0.22	2
CBX3	0.39826	0	0	0.819	0.446	2
CSNK2B	0.397838	0	0	0.814	0.521	2
SPOCK1	0.397702	0	0	0.305	0.027	2
PSMB5	0.397119	0	0	0.811	0.303	2
DIPK2A	0.396961	0	0	0.422	0.107	2
ZNF750	0.396431	0	0	0.289	0.037	2
PKMYT1	0.396406	0	0	0.3	0.04	2
DLL3	0.396302	0	0	0.294	0.024	2
SGCB	0.396298	0	0	0.483	0.081	2
PHF14	0.396211	0	0	0.721	0.287	2
MARCKS	0.39615	0	0	0.421	0.234	2
KLHL23	0.395814	0	0	0.429	0.061	2
TMEM147	0.395182	0	0	0.779	0.373	2
YIPF6	0.394931	0	0	0.557	0.173	2
RNPS1	0.394679	0	0	0.809	0.468	2
ENTPD2	0.394665	0	0	0.325	0.023	2
POLD2	0.394222	0	0	0.646	0.211	2
POP7	0.393048	0	0	0.652	0.208	2
MTURN	0.392857	0	0	0.419	0.089	2
PTOV1	0.392108	0	0	0.679	0.283	2
ERH	0.391598	0	0	0.877	0.527	2
SSX2IP	0.391316	0	0	0.424	0.064	2
AURKAIP1	0.390712	0	0	0.891	0.48	2
TCAF1	0.389947	0	0	0.457	0.106	2
UBE2I	0.389858	0	0	0.87	0.506	2
FAM111B	0.389779	0	0	0.333	0.037	2
HAUS5	0.388815	0	0	0.355	0.079	2
NTHL1	0.387919	0	0	0.522	0.122	2
PIGX	0.387788	0	0	0.506	0.142	2
AP1S1	0.387683	0	0	0.685	0.217	2
NSG2	0.387332	0	0	0.261	0.008	2
PHLDA3	0.387273	0	0	0.418	0.124	2
GNG10	0.387212	0	0	0.788	0.321	2
TUBB2A	0.386927	0	0	0.461	0.161	2
FARP1	0.386571	0	0	0.422	0.1	2
UPF3B	0.386552	0	0	0.563	0.179	2
HYI	0.386162	0	0	0.482	0.134	2
EMP2	0.386149	0	0	0.571	0.141	2
CEP250	0.385884	0	0	0.406	0.114	2
DNAJC19	0.385545	0	0	0.739	0.31	2
RAB40C	0.38498	0	0	0.411	0.088	2
TUFM	0.38498	0	0	0.852	0.459	2
NDUFA7	0.384858	0	0	0.817	0.368	2
HRAS	0.384282	0	0	0.573	0.166	2
ACTG1	0.383707	0	0	0.994	0.894	2
ZFHX3	0.383614	0	0	0.388	0.124	2
GNAO1	0.382982	0	0	0.388	0.038	2
ETV5	0.382904	0	0	0.377	0.074	2
SRSF4	0.38254	0	0	0.7	0.356	2
LINC00665	0.382407	0	0	0.406	0.079	2
AKR7A2	0.382349	0	0	0.619	0.252	2
BTF3L4	0.38223	0	0	0.71	0.304	2
CXXC5	0.381743	0	0	0.538	0.178	2
RBBP7	0.381283	0	0	0.629	0.284	2
GAS2	0.381105	0	0	0.322	0.028	2
FSCN1	0.381036	0	0	0.436	0.117	2
TMEM106C	0.380461	0	0	0.524	0.174	2
RPP21	0.380417	0	0	0.722	0.324	2
KIF22	0.379279	0	0	0.548	0.197	2
TSTD1	0.378919	0	0	0.828	0.392	2
KDELR1	0.378862	0	0	0.772	0.377	2
MAGED2	0.378681	0	0	0.594	0.274	2
RNPEP	0.378428	0	0	0.542	0.213	2
KCNK1	0.37841	0	0	0.354	0.069	2
SERINC2	0.378325	0	0	0.55	0.132	2
TOPBP1	0.378024	0	0	0.481	0.133	2
C1orf122	0.377687	0	0	0.692	0.27	2
GAPDH	0.377559	0	0	0.986	0.915	2
EDF1	0.377519	0	0	0.976	0.726	2
SSRP1	0.377041	0	0	0.667	0.266	2
HDAC2	0.376954	0	0	0.7	0.269	2
FADS2	0.376774	0	0	0.326	0.041	2
ICE1	0.376749	0	0	0.554	0.186	2
TOP1	0.376431	0	0	0.741	0.373	2
HPCA	0.376427	0	0	0.315	0.016	2
USP11	0.375898	0	0	0.533	0.211	2
GKAP1	0.375879	0	0	0.455	0.108	2
TFDP1	0.375795	0	0	0.577	0.203	2
SMS	0.375714	0	0	0.697	0.301	2
CCT6A	0.375187	0	0	0.835	0.4	2
TLE1	0.374947	0	0	0.498	0.122	2
YTHDF2	0.374865	0	0	0.729	0.344	2
TXNL4A	0.374684	0	0	0.784	0.375	2
CCT3	0.374616	0	0	0.878	0.438	2
DPYSL5	0.374243	0	0	0.332	0.022	2
FKBP4	0.374157	0	0	0.69	0.233	2
COCH	0.373357	0	0	0.393	0.038	2
NCAM1	0.37239	0	0	0.356	0.049	2
HMGA1	0.372183	0	0	0.76	0.4	2
SMC4	0.371901	0	0	0.545	0.203	2
CMBL	0.371886	0	0	0.479	0.087	2
MACO1	0.371774	0	0	0.499	0.162	2
SCCPDH	0.371236	0	0	0.547	0.169	2
PFDN2	0.370945	0	0	0.836	0.392	2
SHMT2	0.370882	0	0	0.618	0.216	2
CERS6	0.370794	0	0	0.535	0.146	2
MIF	0.370713	0	0	0.989	0.832	2
XRCC1	0.37056	0	0	0.412	0.129	2
YBX1	0.369507	0	0	0.989	0.813	2
HMGN1	0.369374	0	0	0.954	0.666	2
RPN1	0.368807	0	0	0.622	0.366	2
GNB1	0.368279	0	0	0.751	0.414	2
SLC25A25	0.368271	0	0	0.447	0.129	2
NELFB	0.367187	0	0	0.516	0.164	2
AP2M1	0.366784	0	0	0.841	0.472	2
C1QL1	0.366628	0	0	0.263	0.018	2
STAG2	0.366551	0	0	0.636	0.265	2
IDH2	0.365864	0	0	0.7	0.371	2
KIF21A	0.365859	0	0	0.497	0.144	2
FOXA1	0.365628	0	0	0.424	0.084	2
CAMSAP1	0.365371	0	0	0.43	0.096	2
PSAT1	0.364815	0	0	0.384	0.079	2
INO80E	0.363859	0	0	0.57	0.245	2
GLO1	0.363814	0	0	0.667	0.267	2
C1orf43	0.363535	0	0	0.857	0.424	2
PPIA	0.362612	0	0	0.987	0.853	2
METRN	0.362468	0	0	0.337	0.134	2
INA	0.362435	0	0	0.336	0.023	2
BRIX1	0.362089	0	0	0.616	0.207	2
TIMM50	0.362084	0	0	0.551	0.193	2
DDX39B	0.362038	0	0	0.783	0.427	2
SNRNP25	0.362019	0	0	0.622	0.195	2
SLC29A4	0.361984	0	0	0.308	0.024	2
KIF19	0.36196	0	0	0.324	0.025	2
ACBD6	0.361056	0	0	0.595	0.209	2
DNAJB11	0.359811	0	0	0.661	0.278	2
IRF2BP2	0.359684	0	0	0.748	0.365	2
RANBP1	0.358261	0	0	0.851	0.427	2
PAK4	0.358104	0	0	0.441	0.111	2
TMEM98	0.357892	0	0	0.449	0.097	2
DCTN2	0.357655	0	0	0.713	0.298	2
SNN	0.357225	0	0	0.434	0.115	2
TNNT1	0.357173	0	0	0.299	0.046	2
TSPAN13	0.357009	0	0	0.571	0.169	2
PSMB7	0.356432	0	0	0.829	0.382	2
EPN2	0.356167	0	0	0.451	0.1	2
CCDC28B	0.355955	0	0	0.452	0.07	2
SYT11	0.355603	0	0	0.413	0.106	2
SGCE	0.35522	0	0	0.41	0.07	2
MT-ND4	0.355187	0	0	0.986	0.905	2
BNIP3L	0.355032	0	0	0.638	0.319	2
AHCY	0.354255	0	0	0.649	0.218	2
LRRC26	0.353927	0	0	0.337	0.036	2
AK1	0.353452	0	0	0.57	0.133	2
HES4	0.353424	0	0	0.339	0.118	2
DLX5	0.352824	0	0	0.308	0.025	2
DHX9	0.352423	0	0	0.637	0.266	2
SMARCA4	0.352091	0	0	0.664	0.251	2
YWHAQ	0.351775	0	0	0.893	0.528	2
PPP2CB	0.351615	0	0	0.458	0.153	2
MRPL36	0.351236	0	0	0.693	0.247	2
KLF13	0.350869	0	0	0.568	0.308	2
VEGFA	0.35086	0	0	0.372	0.139	2
TMEM141	0.350735	0	0	0.68	0.265	2
DIPK1B	0.350649	0	0	0.348	0.03	2
SUB1	0.350552	0	0	0.966	0.737	2
COX7B	0.350268	0	0	0.945	0.571	2
MLF2	0.349982	0	0	0.8	0.386	2
EZH2	0.349919	0	0	0.449	0.113	2
LSM2	0.349559	0	0	0.751	0.351	2
HS3ST1	0.349452	0	0	0.344	0.064	2
CDCA7	0.348398	0	0	0.395	0.062	2
CAMK1D	0.347954	0	0	0.364	0.152	2
MAP3K20	0.347883	0	0	0.418	0.103	2
ALDH3A2	0.347648	0	0	0.568	0.161	2
CCDC14	0.347534	0	0	0.478	0.139	2
RBBP8	0.347502	0	0	0.45	0.117	2
ILF3	0.347084	0	0	0.776	0.41	2
VEZF1	0.347061	0	0	0.574	0.2	2
TMEM203	0.346932	0	0	0.522	0.163	2
GPRC5C	0.346826	0	0	0.375	0.065	2
GSE1	0.345935	0	0	0.502	0.135	2
ADAMTS2	0.34583	0	0	0.293	0.023	2
RELN	0.345271	0	0	0.281	0.016	2
TIMM13	0.345173	0	0	0.733	0.321	2
SOGA1	0.344877	0	0	0.379	0.068	2
FYTTD1	0.344735	0	0	0.571	0.237	2
TBC1D24	0.344161	0	0	0.372	0.045	2
TUBG1	0.343965	0	0	0.444	0.115	2
NAXE	0.343928	0	0	0.734	0.298	2
EXOSC5	0.34309	0	0	0.525	0.153	2
DTD1	0.342379	0	0	0.595	0.191	2
ARL3	0.342235	0	0	0.576	0.175	2
ZNF146	0.341514	0	0	0.513	0.183	2
TSEN34	0.341508	0	0	0.646	0.216	2
KALRN	0.341487	0	0	0.337	0.033	2
RAD1	0.341478	0	0	0.507	0.144	2
RPA1	0.341002	0	0	0.468	0.163	2
WNT4	0.34095	0	0	0.255	0.023	2
NOL4	0.340908	0	0	0.256	0.015	2
IPO9	0.340486	0	0	0.494	0.149	2
H2AFY2	0.339726	0	0	0.44	0.061	2
UBE3A	0.339701	0	0	0.658	0.32	2
DNAJC21	0.338676	0	0	0.616	0.27	2
TPX2	0.338321	0	0	0.319	0.07	2
ZSCAN18	0.338031	0	0	0.465	0.111	2
SPATS2	0.337981	0	0	0.508	0.133	2
NIPBL	0.337959	0	0	0.665	0.333	2
KIFAP3	0.337491	0	0	0.455	0.131	2
SRSF9	0.337176	0	0	0.894	0.509	2
XRN2	0.337134	0	0	0.749	0.364	2
RCC2	0.33712	0	0	0.545	0.179	2
AC011603.2	0.336904	0	0	0.321	0.094	2
MKI67	0.336593	0	0	0.308	0.069	2
U2SURP	0.33645	0	0	0.747	0.375	2
SCPEP1	0.336323	0	0	0.571	0.214	2
AC068587.4	0.33631	0	0	0.381	0.092	2
RBFOX2	0.335345	0	0	0.476	0.104	2
BSG	0.334674	0	0	0.852	0.504	2
URI1	0.334291	0	0	0.613	0.316	2
CNTLN	0.334237	0	0	0.389	0.069	2
SMARCE1	0.334225	0	0	0.739	0.326	2
GNB2	0.333837	0	0	0.805	0.513	2
F11R	0.333537	0	0	0.582	0.184	2
FADS1	0.333532	0	0	0.389	0.071	2
TRA2B	0.333186	0	0	0.823	0.507	2
PSENEN	0.332962	0	0	0.621	0.311	2
RPL24	0.332568	0	0	0.996	0.927	2
TFAP2C	0.332566	0	0	0.34	0.046	2
BOD1	0.332437	0	0	0.543	0.156	2
COPRS	0.332333	0	0	0.562	0.167	2
TEAD1	0.332157	0	0	0.418	0.086	2
GSTP1	0.332039	0	0	0.957	0.651	2
NDUFS2	0.331943	0	0	0.678	0.303	2
PRPF8	0.331279	0	0	0.577	0.331	2
C15orf61	0.331228	0	0	0.561	0.186	2
NIPSNAP2	0.330595	0	0	0.582	0.205	2
PJA1	0.330526	0	0	0.417	0.093	2
CIB2	0.330501	0	0	0.383	0.054	2
NSD2	0.330072	0	0	0.47	0.136	2
CITED1	0.329259	0	0	0.27	0.013	2
SCD5	0.328952	0	0	0.375	0.061	2
KTN1	0.328518	0	0	0.87	0.469	2
HOOK1	0.328142	0	0	0.435	0.085	2
HOXB5	0.328075	0	0	0.265	0.036	2
MRPS34	0.327999	0	0	0.797	0.369	2
CLIC4	0.327977	0	0	0.454	0.15	2
FXR1	0.327572	0	0	0.722	0.33	2
MARK1	0.327405	0	0	0.35	0.04	2
KNOP1	0.327201	0	0	0.506	0.138	2
CAMK2N2	0.32692	0	0	0.277	0.019	2
NXN	0.326684	0	0	0.378	0.068	2
ZNF664	0.326376	0	0	0.539	0.17	2
SRM	0.326109	0	0	0.642	0.296	2
TCF19	0.32588	0	0	0.316	0.054	2
ARPP19	0.325777	0	0	0.693	0.297	2
SDHAF1	0.325744	0	0	0.47	0.139	2
PSMB6	0.325556	0	0	0.795	0.468	2
EHMT1	0.325473	0	0	0.547	0.223	2
SUN1	0.325121	0	0	0.557	0.167	2
PHB	0.324947	0	0	0.813	0.369	2
SHD	0.324942	0	0	0.285	0.021	2
ZNF793	0.32447	0	0	0.29	0.034	2
MRPL3	0.323831	0	0	0.673	0.267	2
NDUFS8	0.323654	0	0	0.818	0.431	2
PUM1	0.323357	0	0	0.624	0.268	2
FKBP3	0.322916	0	0	0.659	0.261	2
CTNNAL1	0.322845	0	0	0.406	0.091	2
SNRPF	0.322826	0	0	0.854	0.445	2
MTHFD1	0.322391	0	0	0.436	0.123	2
EPRS	0.322308	0	0	0.641	0.265	2
MEIS2	0.321621	0	0	0.36	0.059	2
MEAF6	0.321363	0	0	0.748	0.372	2
CDH2	0.321274	0	0	0.278	0.024	2
HNRNPA3	0.321273	0	0	0.912	0.606	2
TBCA	0.320943	0	0	0.906	0.558	2
PAM16	0.320116	0	0	0.639	0.209	2
ASF1B	0.319992	0	0	0.283	0.056	2
SHF	0.319561	0	0	0.284	0.031	2
DUSP23	0.319307	0	0	0.639	0.259	2
LRRC42	0.319272	0	0	0.429	0.099	2
RAB11A	0.319126	0	0	0.835	0.401	2
CDT1	0.318789	0	0	0.369	0.06	2
TPGS2	0.318309	0	0	0.6	0.205	2
LRRC58	0.318214	0	0	0.512	0.163	2
TPR	0.317866	0	0	0.754	0.422	2
FAAP20	0.317495	0	0	0.765	0.366	2
RMI2	0.317179	0	0	0.347	0.052	2
BSPRY	0.317068	0	0	0.406	0.063	2
CALR	0.316709	0	0	0.941	0.642	2
CNPY2	0.316542	0	0	0.761	0.36	2
SRSF3	0.316483	0	0	0.918	0.618	2
STOML2	0.315194	0	0	0.758	0.31	2
PHF6	0.315047	0	0	0.51	0.134	2
CDC42BPA	0.315021	0	0	0.425	0.085	2
IFT22	0.314909	0	0	0.505	0.124	2
LINC00511	0.314398	0	0	0.421	0.078	2
FXYD3	0.314372	0	0	0.551	0.167	2
TLCD3B	0.314272	0	0	0.301	0.014	2
ACTN4	0.314104	0	0	0.661	0.38	2
RIPPLY3	0.313626	0	0	0.271	0.022	2
ZNF131	0.313492	0	0	0.58	0.215	2
SKP2	0.313155	0	0	0.384	0.081	2
IER5L	0.312972	0	0	0.411	0.172	2
FMC1	0.312959	0	0	0.571	0.191	2
IGSF9	0.312843	0	0	0.344	0.043	2
MPC2	0.312657	0	0	0.775	0.379	2
SLIRP	0.312613	0	0	0.816	0.367	2
XPR1	0.312522	0	0	0.412	0.109	2
PDAP1	0.312237	0	0	0.76	0.358	2
ZNF260	0.311986	0	0	0.36	0.074	2
UBALD1	0.311884	0	0	0.45	0.137	2
KDM5B	0.311377	0	0	0.587	0.218	2
RAC3	0.311305	0	0	0.394	0.06	2
RHOU	0.311107	0	0	0.328	0.082	2
RFC2	0.310885	0	0	0.461	0.126	2
MRPS2	0.310685	0	0	0.559	0.178	2
DMWD	0.310325	0	0	0.384	0.111	2
AC004540.2	0.309986	0	0	0.285	0.015	2
NUP155	0.309756	0	0	0.408	0.099	2
LSM7	0.309681	0	0	0.887	0.506	2
JPX	0.309597	0	0	0.592	0.235	2
MYEF2	0.309323	0	0	0.423	0.076	2
C16orf91	0.309201	0	0	0.512	0.141	2
CCT8	0.309099	0	0	0.828	0.414	2
SRSF1	0.308934	0	0	0.678	0.299	2
SRRM2	0.308822	0	0	0.882	0.604	2
DHPS	0.308609	0	0	0.659	0.279	2
RHOBTB3	0.308472	0	0	0.488	0.132	2
MRPL12	0.30847	0	0	0.631	0.258	2
SLC25A4	0.308359	0	0	0.578	0.156	2
SAC3D1	0.308298	0	0	0.458	0.11	2
HSD17B10	0.308285	0	0	0.677	0.302	2
ELP5	0.30813	0	0	0.463	0.194	2
MEA1	0.308063	0	0	0.658	0.319	2
NMNAT3	0.307994	0	0	0.316	0.039	2
RNASEH2A	0.307468	0	0	0.335	0.073	2
ZNF302	0.307323	0	0	0.418	0.124	2
ZFP30	0.306752	0	0	0.268	0.033	2
NDUFS3	0.30668	0	0	0.727	0.304	2
RIMS2	0.306632	0	0	0.33	0.025	2
DBNDD2	0.306347	0	0	0.601	0.199	2
SSBP4	0.306203	0	0	0.622	0.301	2
GLUL	0.306088	0	0	0.881	0.36	2
TMEM14B	0.305835	0	0	0.794	0.433	2
GOLGB1	0.305288	0	0	0.623	0.288	2
MRPL51	0.305024	0	0	0.865	0.435	2
STXBP5L	0.304849	0	0	0.315	0.017	2
PLD3	0.304082	0	0	0.685	0.317	2
RAN	0.304038	0	0	0.952	0.677	2
ST6GALNAC2	0.303446	0	0	0.274	0.035	2
EIF3I	0.303404	0	0	0.86	0.461	2
PSD3	0.302856	0	0	0.35	0.075	2
CALML3	0.302706	0	0	0.269	0.048	2
AKR1A1	0.3024	0	0	0.737	0.345	2
PRR36	0.30215	0	0	0.324	0.033	2
NAT14	0.301974	0	0	0.392	0.07	2
PLOD2	0.30195	0	0	0.311	0.069	2
CCT2	0.301894	0	0	0.823	0.388	2
TPM1	0.301762	0	0	0.592	0.187	2
RUVBL1	0.301757	0	0	0.545	0.178	2
ST18	0.300772	0	0	0.262	0.028	2
PDXP	0.300737	0	0	0.361	0.073	2
NBPF1	0.300651	0	0	0.345	0.074	2
SOGA3	0.300544	0	0	0.307	0.031	2
MSH2	0.300066	0	0	0.418	0.101	2
ZWINT	0.300031	0	0	0.366	0.078	2
CAPRIN1	0.299901	0	0	0.687	0.302	2
PIN1	0.29989	0	0	0.718	0.352	2
ZNF738	0.299605	0	0	0.352	0.057	2
IP6K2	0.299555	0	0	0.63	0.239	2
TRIO	0.299549	0	0	0.419	0.112	2
MT-CO2	0.299526	0	0	0.994	0.947	2
MESP1	0.299318	0	0	0.388	0.057	2
ZNF43	0.299257	0	0	0.353	0.065	2
MAFB	0.299113	0	0	0.298	0.12	2
TFG	0.298927	0	0	0.684	0.274	2
MRPL14	0.298608	0	0	0.755	0.332	2
ZFAND5	0.298414	0	0	0.851	0.446	2
PAXX	0.298153	0	0	0.698	0.446	2
TIMELESS	0.298031	0	0	0.364	0.068	2
TRMT9B	0.29797	0	0	0.275	0.019	2
COX17	0.297885	0	0	0.833	0.414	2
NME4	0.297533	0	0	0.513	0.221	2
SLC6A8	0.297435	0	0	0.372	0.073	2
SNRPA	0.297345	0	0	0.574	0.252	2
DSTN	0.297306	0	0	0.861	0.431	2
WRAP73	0.297172	0	0	0.437	0.133	2
MRPL41	0.297022	0	0	0.788	0.432	2
HOXB6	0.296834	0	0	0.257	0.038	2
PPDPF	0.296815	0	0	0.96	0.727	2
MT-ATP8	0.296768	0	0	0.567	0.321	2
MRPL37	0.296238	0	0	0.614	0.233	2
EFNB2	0.295887	0	0	0.297	0.063	2
EPHX1	0.295021	0	0	0.45	0.133	2
ATPAF1	0.294815	0	0	0.504	0.174	2
FBXO45	0.29452	0	0	0.393	0.097	2
RPL7L1	0.294397	0	0	0.68	0.283	2
FAM50A	0.294183	0	0	0.634	0.314	2
AHCYL1	0.294083	0	0	0.547	0.213	2
MAPK8IP1	0.29393	0	0	0.343	0.045	2
NUDT1	0.293929	0	0	0.553	0.22	2
FOXD3-AS1	0.293891	0	0	0.304	0.022	2
CCSAP	0.293247	0	0	0.315	0.066	2
DTL	0.293209	0	0	0.274	0.035	2
CTSF	0.293206	0	0	0.459	0.107	2
MDH2	0.293109	0	0	0.845	0.478	2
NDUFA8	0.293069	0	0	0.67	0.254	2
MANBAL	0.292858	0	0	0.488	0.13	2
MRPL20	0.292615	0	0	0.835	0.436	2
SIPA1L3	0.2924	0	0	0.339	0.099	2
RAB3A	0.292399	0	0	0.307	0.036	2
NUAK1	0.292198	0	0	0.297	0.041	2
AHI1	0.292063	0	0	0.505	0.163	2
GTF2A2	0.291703	0	0	0.768	0.396	2
CTNNBIP1	0.291445	0	0	0.53	0.178	2
TMEM63B	0.291217	0	0	0.356	0.094	2
CADM4	0.290909	0	0	0.32	0.04	2
CUX1	0.290607	0	0	0.534	0.205	2
RBMX	0.290552	0	0	0.864	0.485	2
AGPAT5	0.290465	0	0	0.39	0.115	2
RNF24	0.290031	0	0	0.448	0.116	2
MCM6	0.289888	0	0	0.4	0.095	2
DLG3	0.28896	0	0	0.405	0.085	2
ROGDI	0.288771	0	0	0.447	0.126	2
GABRB3	0.288746	0	0	0.284	0.016	2
TTF1	0.288647	0	0	0.449	0.145	2
PKN2	0.288632	0	0	0.599	0.217	2
RNF168	0.288542	0	0	0.525	0.216	2
MT-CYB	0.288459	0	0	0.986	0.919	2
LAMTOR5	0.287901	0	0	0.871	0.473	2
GCSH	0.28782	0	0	0.568	0.171	2
DTYMK	0.287605	0	0	0.491	0.165	2
SNHG32	0.287462	0	0	0.702	0.436	2
SLC36A4	0.287359	0	0	0.416	0.102	2
PRC1	0.287187	0	0	0.343	0.073	2
APOO	0.287086	0	0	0.436	0.109	2
PRDX4	0.286807	0	0	0.651	0.256	2
ATP2B4	0.286765	0	0	0.474	0.213	2
TIMM17B	0.286256	0	0	0.642	0.284	2
GET1	0.285785	0	0	0.479	0.13	2
KPNB1	0.285772	0	0	0.78	0.409	2
ARL16	0.285603	0	0	0.632	0.221	2
TXNRD1	0.285487	0	0	0.589	0.195	2
CRNDE	0.28533	0	0	0.409	0.109	2
UCKL1	0.285134	0	0	0.461	0.15	2
SLC25A39	0.285062	0	0	0.746	0.34	2
CDKN1A	0.284677	0	0	0.619	0.334	2
EEF1E1	0.284673	0	0	0.567	0.209	2
CTBP2	0.284652	0	0	0.507	0.142	2
TNFRSF12A	0.284361	0	0	0.481	0.152	2
DNAJC9	0.284263	0	0	0.52	0.195	2
NANOS1	0.284134	0	0	0.267	0.027	2
MGST3	0.283701	0	0	0.767	0.407	2
ZKSCAN1	0.283256	0	0	0.565	0.202	2
AKT3	0.283228	0	0	0.397	0.121	2
WEE1	0.283127	0	0	0.475	0.125	2
SLC47A1	0.282873	0	0	0.258	0.019	2
TCEA3	0.282713	0	0	0.347	0.093	2
NRM	0.28271	0	0	0.354	0.074	2
HNRNPA0	0.282656	0	0	0.831	0.607	2
SDHA	0.282546	0	0	0.615	0.317	2
LZTS3	0.282543	0	0	0.323	0.05	2
STX1A	0.28239	0	0	0.321	0.042	2
RRM1	0.282252	0	0	0.443	0.14	2
CDCA4	0.282215	0	0	0.401	0.11	2
HGS	0.282092	0	0	0.506	0.22	2
CHML	0.281871	0	0	0.324	0.068	2
NEO1	0.281512	0	0	0.351	0.062	2
TARS	0.281371	0	0	0.532	0.193	2
PER3	0.281129	0	0	0.311	0.057	2
GGH	0.280995	0	0	0.359	0.083	2
NSG1	0.28053	0	0	0.315	0.069	2
KIF1B	0.280398	0	0	0.441	0.126	2
PTPRK	0.279902	0	0	0.361	0.09	2
EIF4G1	0.279741	0	0	0.658	0.309	2
CDKAL1	0.27959	0	0	0.379	0.092	2
TXLNA	0.279438	0	0	0.44	0.131	2
SFN	0.279263	0	0	0.476	0.134	2
COPS6	0.279001	0	0	0.725	0.368	2
TLE5	0.278907	0	0	0.841	0.585	2
COPS3	0.278805	0	0	0.568	0.234	2
DEXI	0.278371	0	0	0.452	0.128	2
ARMCX3	0.278295	0	0	0.528	0.214	2
PNKD	0.278218	0	0	0.664	0.292	2
NORAD	0.277688	0	0	0.661	0.314	2
NFASC	0.277471	0	0	0.307	0.029	2
ZNF585A	0.277437	0	0	0.403	0.153	2
DHX40	0.277393	0	0	0.428	0.121	2
ATCAY	0.27724	0	0	0.273	0.014	2
ANP32B	0.277239	0	0	0.901	0.573	2
KRT8	0.277229	0	0	0.763	0.234	2
NDUFB9	0.277128	0	0	0.857	0.522	2
INSR	0.277094	0	0	0.381	0.081	2
NDUFA13	0.277033	0	0	0.951	0.673	2
VDAC2	0.276915	0	0	0.893	0.508	2
ITGB3BP	0.276849	0	0	0.459	0.115	2
GDAP1	0.276627	0	0	0.331	0.052	2
MSANTD3	0.276602	0	0	0.409	0.098	2
CCNF	0.276093	0	0	0.304	0.04	2
METTL26	0.27607	0	0	0.76	0.387	2
TSPAN5	0.275649	0	0	0.362	0.119	2
STON2	0.275631	0	0	0.297	0.037	2
COL9A2	0.275447	0	0	0.288	0.057	2
ATP1A1	0.275304	0	0	0.708	0.421	2
BCL2L1	0.274938	0	0	0.534	0.195	2
TRIM28	0.274891	0	0	0.65	0.328	2
MCUR1	0.274777	0	0	0.533	0.197	2
HMGB1	0.274686	0	0	0.96	0.804	2
ZNF367	0.274548	0	0	0.279	0.039	2
NCAPG2	0.274357	0	0	0.34	0.056	2
CECR2	0.27434	0	0	0.287	0.027	2
PPA1	0.274288	0	0	0.833	0.414	2
NHP2	0.273683	0	0	0.77	0.392	2
CLPTM1	0.273587	0	0	0.497	0.235	2
DHX36	0.273304	0	0	0.713	0.377	2
BMERB1	0.273267	0	0	0.327	0.055	2
COX5A	0.273089	0	0	0.907	0.546	2
TPD52	0.272963	0	0	0.567	0.222	2
VPS72	0.272925	0	0	0.516	0.189	2
MRFAP1	0.272897	0	0	0.836	0.426	2
KIAA1211L	0.272789	0	0	0.284	0.043	2
SLC25A29	0.272786	0	0	0.399	0.086	2
ARL6IP6	0.272629	0	0	0.522	0.212	2
UBXN7	0.272175	0	0	0.448	0.148	2
CEP41	0.272099	0	0	0.347	0.071	2
NELFE	0.272075	0	0	0.634	0.279	2
GSTA4	0.271986	0	0	0.371	0.069	2
RDX	0.27197	0	0	0.528	0.21	2
THOC6	0.271782	0	0	0.431	0.148	2
AFDN	0.271758	0	0	0.479	0.146	2
TCEAL8	0.271736	0	0	0.579	0.213	2
DPY30	0.271678	0	0	0.71	0.319	2
GADD45GIP1	0.271602	0	0	0.828	0.435	2
ZNF644	0.271551	0	0	0.587	0.255	2
PLEKHG4B	0.271478	0	0	0.308	0.033	2
AHDC1	0.27137	0	0	0.353	0.08	2
EGFR	0.271306	0	0	0.282	0.073	2
RAB6B	0.271187	0	0	0.286	0.028	2
MRPS24	0.271031	0	0	0.821	0.405	2
LDOC1	0.271026	0	0	0.361	0.077	2
SARS2	0.270909	0	0	0.354	0.087	2
CTPS1	0.270594	0	0	0.415	0.108	2
OLA1	0.270536	0	0	0.718	0.317	2
NFIX	0.270458	0	0	0.368	0.085	2
GRM8	0.270013	0	0	0.256	0.013	2
ID1	0.269943	0	0	0.393	0.175	2
PERP	0.269937	0	0	0.675	0.231	2
MTCL1	0.269889	0	0	0.304	0.03	2
ZFR	0.269731	0	0	0.574	0.252	2
FDPS	0.269712	0	0	0.679	0.304	2
BAALC	0.269381	0	0	0.252	0.032	2
SNRPC	0.269138	0	0	0.768	0.39	2
JPT2	0.269057	0	0	0.47	0.133	2
UQCRFS1	0.269053	0	0	0.834	0.466	2
EFHC1	0.268669	0	0	0.424	0.101	2
UBN1	0.268669	0	0	0.538	0.226	2
POGK	0.268527	0	0	0.432	0.138	2
DSN1	0.268295	0	0	0.355	0.072	2
TRAF4	0.268249	0	0	0.614	0.207	2
TSPYL5	0.268184	0	0	0.291	0.041	2
PRDX3	0.268133	0	0	0.692	0.319	2
GAMT	0.267616	0	0	0.479	0.131	2
NDUFA11	0.267217	0	0	0.92	0.601	2
PIN4	0.267179	0	0	0.592	0.232	2
TMEM108	0.267092	0	0	0.27	0.02	2
GDE1	0.267054	0	0	0.521	0.179	2
THOC2	0.266751	0	0	0.605	0.286	2
CNOT7	0.266594	0	0	0.677	0.313	2
SF3B4	0.266558	0	0	0.569	0.296	2
EI24	0.266312	0	0	0.614	0.229	2
ABI2	0.266179	0	0	0.494	0.147	2
HIRIP3	0.266159	0	0	0.414	0.108	2
NCBP2	0.266105	0	0	0.607	0.253	2
ATP5PO	0.266091	0	0	0.91	0.606	2
CENPU	0.266054	0	0	0.339	0.075	2
CORO1C	0.265938	0	0	0.516	0.161	2
PMPCA	0.265659	0	0	0.477	0.158	2
CNBP	0.265626	0	0	0.929	0.683	2
ZNF576	0.265431	0	0	0.4	0.094	2
MRPL11	0.265334	0	0	0.715	0.297	2
NAA38	0.265321	0	0	0.726	0.372	2
OCIAD2	0.264932	0	0	0.83	0.416	2
DVL3	0.264891	0	0	0.462	0.151	2
MYT1	0.264676	0	0	0.277	0.014	2
QSER1	0.264575	0	0	0.393	0.096	2
WDR5	0.264563	0	0	0.419	0.117	2
IMMP1L	0.264429	0	0	0.39	0.121	2
SUZ12	0.264275	0	0	0.579	0.263	2
IRF2BP1	0.264145	0	0	0.338	0.09	2
MAGOH	0.264047	0	0	0.722	0.402	2
CASTOR3	0.263943	0	0	0.315	0.052	2
PHIP	0.263926	0	0	0.667	0.337	2
REV3L	0.263886	0	0	0.5	0.196	2
DLG1	0.263617	0	0	0.54	0.196	2
NPTXR	0.263535	0	0	0.28	0.026	2
KLF7	0.263427	0	0	0.357	0.085	2
IGFBPL1	0.263371	0	0	0.262	0.024	2
HIGD1A	0.263179	0	0	0.52	0.162	2
ANKRD6	0.263063	0	0	0.295	0.034	2
GSTM3	0.262968	0	0	0.512	0.126	2
CSRP2	0.262901	0	0	0.299	0.06	2
[truncated: 20,097 more rows]

## Sheet: CD4+ T cells
Table S2. List of genes specific to the cell clusters in total cells and each cell lineage.
gene	avg_logFC	p_val	p_val_adj	pct.1	pct.2	cluster
RPS6	0.407911	0	0	1	0.972	0
RPS3A	0.381335	0	0	1	0.971	0
RPL34	0.373366	0	0	1	0.974	0
RPS13	0.370142	0	0	0.998	0.962	0
RPL32	0.36431	0	0	1	0.978	0
RPS14	0.360051	0	0	1	0.976	0
RPS12	0.341115	0	0	1	0.979	0
RPL13	0.326444	0	0	1	0.985	0
RPS23	0.322022	0	0	0.999	0.97	0
RPS27A	0.318057	0	0	1	0.978	0
RPL11	0.307915	0	0	1	0.976	0
RPL19	0.301869	0	0	1	0.975	0
RPL10	0.280303	7.0922e-299	2.39106e-294	1	0.989	0
RPL35A	0.320755	8.11233e-299	2.73499e-294	0.998	0.962	0
RPL18A	0.30603	1.14723e-292	3.86776e-288	1	0.974	0
RPS5	0.350938	4.41921e-288	1.48989e-283	0.997	0.948	0
RPS25	0.305938	6.9182e-286	2.3324e-281	1	0.969	0
RPS15A	0.271399	3.0398e-277	1.02484e-272	1	0.977	0
RPL9	0.359467	5.22867e-267	1.76279e-262	0.999	0.96	0
RPL3	0.354278	7.13775e-262	2.40642e-257	1	0.971	0
RPL22	0.355622	3.71268e-260	1.25169e-255	0.986	0.921	0
RPS8	0.328984	5.52264e-260	1.8619e-255	1	0.973	0
RPS27	0.318984	5.74585e-253	1.93715e-248	1	0.985	0
RPL18	0.279594	2.77582e-251	9.3584e-247	0.998	0.965	0
EEF1G	0.429836	1.45596e-244	4.90862e-240	0.992	0.922	0
RPS18	0.327211	1.25762e-242	4.23996e-238	1	0.979	0
RPL10A	0.34695	4.42225e-242	1.49092e-237	0.997	0.952	0
RPS3	0.263513	7.33888e-242	2.47423e-237	1	0.975	0
RPLP2	0.376475	1.67937e-232	5.66184e-228	0.999	0.971	0
RPL39	0.291204	7.74365e-229	2.6107e-224	1	0.968	0
RPS4X	0.283527	5.03597e-228	1.69783e-223	1	0.97	0
RPL21	0.429015	4.28378e-222	1.44423e-217	1	0.966	0
RPL5	0.306227	1.23819e-219	4.17445e-215	0.993	0.946	0
RPL37	0.30782	2.02902e-219	6.84063e-215	0.995	0.958	0
EEF1B2	0.368808	8.46021e-217	2.85228e-212	0.978	0.888	0
RPL14	0.266921	1.20052e-209	4.04743e-205	0.998	0.964	0
RPL29	0.279629	8.59093e-209	2.89635e-204	0.997	0.961	0
EEF1A1	0.254313	2.37145e-208	7.99511e-204	1	0.99	0
RPS9	0.299332	5.6838e-208	1.91624e-203	0.998	0.959	0
RPS2	0.306171	2.40924e-197	8.12252e-193	1	0.975	0
RPL38	0.375608	1.36303e-194	4.59533e-190	0.985	0.905	0
RPL30	0.266844	1.7893e-188	6.03245e-184	1	0.975	0
RPS28	0.258995	2.02712e-183	6.83423e-179	0.997	0.969	0
RPL36	0.264439	2.76291e-182	9.31486e-178	0.998	0.956	0
RPL4	0.318619	2.27333e-176	7.6643e-172	0.987	0.922	0
RPL36A	0.322685	3.48541e-171	1.17507e-166	0.991	0.928	0
RPL37A	0.31453	1.10411e-168	3.72239e-164	0.99	0.924	0
RPSA	0.279992	1.78798e-168	6.028e-164	0.993	0.942	0
RPL17	0.308476	1.17631e-167	3.96581e-163	1	0.963	0
RPS16	0.290547	1.91835e-163	6.46751e-159	0.998	0.96	0
GAS5	0.398276	1.67278e-161	5.6396e-157	0.909	0.752	0
RPL27	0.329559	2.28101e-160	7.6902e-156	0.994	0.926	0
RPL31	0.43171	5.2021e-156	1.75383e-151	0.991	0.922	0
RPL7	0.416099	1.13241e-154	3.8178e-150	0.992	0.922	0
UBA52	0.260299	7.67442e-154	2.58736e-149	0.99	0.938	0
RPS21	0.271704	4.06319e-143	1.36986e-138	0.985	0.939	0
SNHG29	0.341087	5.9985e-142	2.02233e-137	0.926	0.788	0
NOP53	0.32974	2.77725e-135	9.36321e-131	0.937	0.809	0
RPL23A	0.310407	4.11394e-134	1.38698e-129	1	0.963	0
CCR7	0.377775	1.25882e-130	4.24398e-126	0.667	0.428	0
EIF3E	0.344417	1.05817e-128	3.56751e-124	0.883	0.732	0
RPS29	0.375522	3.78292e-128	1.27537e-123	0.994	0.945	0
LDHB	0.296901	1.18572e-123	3.99753e-119	0.923	0.79	0
RPL13A	0.389829	2.90525e-123	9.79476e-119	0.995	0.947	0
PLAC8	0.34924	7.98128e-114	2.69081e-109	0.474	0.262	0
RPS20	0.427963	4.03335e-113	1.3598e-108	0.955	0.86	0
SELL	0.401987	2.63884e-110	8.89659e-106	0.642	0.429	0
RPS11	0.303415	1.6018e-103	5.4003e-99	0.98	0.907	0
TCF7	0.362395	1.67002e-98	5.63029e-94	0.687	0.486	0
ACTN1	0.277527	5.52949e-95	1.86421e-90	0.346	0.178	0
RPL23	0.333843	1.42999e-92	4.82108e-88	0.943	0.84	0
LEF1	0.356139	5.50126e-91	1.8547e-86	0.575	0.391	0
RPL27A	0.369901	1.05664e-87	3.56236e-83	0.97	0.904	0
PRKCQ-AS1	0.331347	5.96717e-87	2.01177e-82	0.469	0.291	0
NOSIP	0.325781	9.33737e-87	3.148e-82	0.644	0.468	0
TSHZ2	0.270646	1.25767e-85	4.24009e-81	0.382	0.211	0
RPS10	0.37895	1.28576e-84	4.33481e-80	0.838	0.671	0
RPS17	0.402926	1.45436e-83	4.90323e-79	0.943	0.846	0
RPS4Y1	0.265277	2.04993e-73	6.91115e-69	0.824	0.689	0
MAL	0.257309	2.51522e-66	8.47981e-62	0.478	0.313	0
SNHG32	0.305879	6.03895e-64	2.03597e-59	0.571	0.41	0
SNHG5	0.320749	3.51626e-62	1.18547e-57	0.772	0.632	0
RPS26	0.341315	2.06255e-32	6.95369e-28	0.926	0.892	0
ANXA1	0.391934	1.24654e-136	4.20258e-132	0.827	0.561	1
VIM	0.354939	1.91143e-107	6.44419e-103	0.94	0.828	1
IL7R	0.38805	1.44543e-105	4.87311e-101	0.841	0.676	1
S100A4	0.323427	1.14438e-103	3.85815e-99	0.927	0.749	1
AHNAK	0.340645	3.7125e-86	1.25163e-81	0.614	0.414	1
S100A11	0.289544	2.30011e-82	7.75458e-78	0.785	0.595	1
CAPG	0.262408	9.34892e-72	3.15189e-67	0.301	0.155	1
S100A10	0.264514	6.21134e-71	2.09409e-66	0.812	0.658	1
CRIP1	0.294041	1.36147e-66	4.59007e-62	0.89	0.754	1
BHLHE40	0.276342	1.05302e-62	3.55017e-58	0.366	0.215	1
KLRB1	0.440582	9.67608e-59	3.26219e-54	0.382	0.23	1
LMNA	0.272168	5.06178e-40	1.70653e-35	0.456	0.32	1
TNFRSF4	1.89473	0	0	0.666	0.162	2
FOXP3	1.86343	0	0	0.669	0.03	2
TNFRSF18	1.52646	0	0	0.577	0.085	2
TIGIT	1.41562	0	0	0.752	0.126	2
CTLA4	1.40468	0	0	0.685	0.148	2
IL2RA	1.38359	0	0	0.512	0.05	2
BATF	1.34606	0	0	0.728	0.25	2
DUSP4	1.25628	0	0	0.642	0.155	2
IL32	1.21109	0	0	0.992	0.856	2
TNFRSF1B	1.20983	0	0	0.708	0.239	2
CTSC	1.18554	0	0	0.714	0.295	2
LINC01943	1.15527	0	0	0.495	0.052	2
CARD16	1.12882	0	0	0.722	0.242	2
CD74	1.06809	0	0	0.934	0.712	2
HLA-DRB1	1.03106	0	0	0.598	0.2	2
LAIR2	1.03055	0	0	0.392	0.034	2
PHLDA1	1.00664	0	0	0.533	0.161	2
SAT1	0.998615	0	0	0.88	0.618	2
PMAIP1	0.99195	0	0	0.606	0.207	2
RGS1	0.956633	0	0	0.832	0.41	2
GBP5	0.914411	0	0	0.6	0.209	2
TYMP	0.888728	0	0	0.517	0.189	2
TNFRSF9	0.888467	0	0	0.294	0.012	2
CYTOR	0.884121	0	0	0.646	0.204	2
IL2RB	0.872398	0	0	0.578	0.198	2
CD27	0.839765	0	0	0.773	0.412	2
MAGEH1	0.838677	0	0	0.379	0.111	2
IKZF2	0.825288	0	0	0.422	0.031	2
ICOS	0.823124	0	0	0.651	0.315	2
ARID5B	0.819532	0	0	0.731	0.37	2
TBC1D4	0.800083	0	0	0.505	0.131	2
GBP2	0.798277	0	0	0.642	0.275	2
DNPH1	0.793633	0	0	0.613	0.255	2
ACP5	0.775503	0	0	0.411	0.119	2
HLA-A	0.76457	0	0	0.997	0.964	2
MIR4435-2HG	0.759562	0	0	0.444	0.065	2
CXCR6	0.744594	0	0	0.348	0.056	2
STAM	0.737185	0	0	0.479	0.104	2
RTKN2	0.730133	0	0	0.325	0.03	2
HLA-DPA1	0.726208	0	0	0.638	0.261	2
GAPDH	0.713192	0	0	0.987	0.907	2
HLA-DQA1	0.70515	0	0	0.296	0.049	2
LAYN	0.699931	0	0	0.287	0.007	2
HLA-DRB5	0.689918	0	0	0.384	0.1	2
CCR8	0.673729	0	0	0.275	0.012	2
ENTPD1	0.64854	0	0	0.275	0.022	2
ICA1	0.618774	0	0	0.283	0.042	2
EPSTI1	0.60355	0	0	0.491	0.167	2
SPATS2L	0.588487	0	0	0.373	0.082	2
HLA-DMA	0.572704	0	0	0.405	0.106	2
PFN1	0.533644	0	0	0.984	0.919	2
NCF4	0.524059	0	0	0.383	0.081	2
PTTG1	0.507025	0	0	0.391	0.104	2
CCNG2	0.503251	0	0	0.28	0.057	2
GK	0.488209	0	0	0.269	0.041	2
TOX2	0.427437	0	0	0.282	0.051	2
B2M	0.418017	0	0	1	0.99	2
S100A4	0.712203	2.76866e-303	9.33425e-299	0.951	0.746	2
SH2D2A	0.743098	4.14271e-292	1.39667e-287	0.543	0.229	2
ARPC1B	0.618135	1.97441e-286	6.65653e-282	0.864	0.642	2
HLA-DQB1	0.619509	2.09838e-286	7.07448e-282	0.435	0.141	2
GADD45A	0.790364	1.03261e-283	3.48133e-279	0.458	0.17	2
HLA-C	0.465088	1.01212e-279	3.41227e-275	0.995	0.956	2
PIM2	0.81251	2.17358e-278	7.32802e-274	0.669	0.375	2
IL2RG	0.621806	4.67775e-278	1.57706e-273	0.872	0.669	2
ACTB	0.527761	1.06575e-274	3.59307e-270	0.999	0.974	2
GLRX	0.744635	6.16005e-274	2.0768e-269	0.516	0.217	2
MYL6	0.543894	7.29229e-263	2.45852e-258	0.96	0.874	2
UBC	0.596627	5.47944e-262	1.84734e-257	0.971	0.903	2
SIRPG	0.597092	1.80311e-259	6.07899e-255	0.512	0.218	2
OAZ1	0.506542	2.97928e-256	1.00443e-251	0.957	0.849	2
GLCCI1	0.625507	3.93727e-256	1.32741e-251	0.474	0.193	2
PHTF2	0.53782	1.53543e-249	5.17655e-245	0.458	0.177	2
FAS	0.492102	5.41659e-246	1.82615e-241	0.417	0.147	2
CORO1B	0.723355	6.65437e-246	2.24346e-241	0.682	0.397	2
PRDM1	0.60398	6.69697e-244	2.25782e-239	0.445	0.167	2
CALM3	0.585756	1.23953e-240	4.17897e-236	0.746	0.478	2
RAB11FIP1	0.504803	3.05383e-238	1.02957e-233	0.408	0.147	2
HLA-B	0.428587	2.82896e-235	9.53754e-231	0.997	0.964	2
DUSP10	0.495836	4.06214e-232	1.36951e-227	0.349	0.112	2
PTPRJ	0.442391	1.09714e-231	3.69891e-227	0.353	0.115	2
SRGN	0.519266	2.60714e-230	8.78969e-226	0.945	0.769	2
PKM	0.79922	1.01906e-229	3.43564e-225	0.773	0.552	2
RHOC	0.527865	1.14953e-227	3.87552e-223	0.466	0.189	2
CD79B	0.389457	1.36633e-224	4.60643e-220	0.312	0.091	2
CLIC1	0.521431	3.23841e-224	1.0918e-219	0.861	0.637	2
NIBAN1	0.41935	3.95076e-224	1.33196e-219	0.415	0.147	2
CD7	0.758631	1.66005e-220	5.5967e-216	0.803	0.588	2
TSPAN5	0.39889	2.8058e-218	9.45948e-214	0.328	0.102	2
ZNRF1	0.432359	2.30969e-213	7.7869e-209	0.349	0.117	2
IGFLR1	0.57072	1.33397e-211	4.49733e-207	0.534	0.257	2
CST7	0.517571	3.74426e-211	1.26234e-206	0.561	0.252	2
PHACTR2	0.515132	5.58304e-210	1.88227e-205	0.454	0.193	2
TTN	0.498473	6.69669e-210	2.25772e-205	0.314	0.099	2
NAMPT	0.601663	4.17381e-207	1.40716e-202	0.487	0.227	2
CHST11	0.479638	4.34638e-207	1.46534e-202	0.462	0.197	2
ENO1	0.656368	2.36887e-206	7.9864e-202	0.791	0.583	2
OAS1	0.465661	9.78529e-206	3.29901e-201	0.285	0.083	2
CD58	0.382377	2.23958e-205	7.55051e-201	0.356	0.12	2
PPM1G	0.50262	1.2838e-202	4.32821e-198	0.59	0.32	2
ACTN4	0.450299	1.34995e-199	4.55121e-195	0.492	0.217	2
STX11	0.369303	2.20597e-198	7.43721e-194	0.29	0.086	2
LSP1	0.478397	2.82149e-198	9.51237e-194	0.85	0.643	2
MAF	0.44396	9.5895e-196	3.233e-191	0.419	0.165	2
PELI1	0.559844	5.9309e-195	1.99955e-190	0.431	0.186	2
ZNRF2	0.413033	7.12947e-195	2.40363e-190	0.349	0.127	2
NEDD9	0.448866	8.10474e-195	2.73243e-190	0.334	0.115	2
CASP1	0.439071	7.84758e-194	2.64573e-189	0.41	0.162	2
HTATIP2	0.45531	2.15118e-193	7.25249e-189	0.352	0.129	2
DUSP16	0.456694	7.99921e-191	2.69685e-186	0.391	0.154	2
SUMO2	0.418634	1.07459e-190	3.62289e-186	0.89	0.743	2
RHBDD2	0.518088	1.25291e-189	4.22405e-185	0.51	0.249	2
NDFIP2	0.360966	3.53096e-188	1.19043e-183	0.262	0.076	2
BACH1	0.380119	3.44711e-187	1.16216e-182	0.295	0.096	2
SPOCK2	0.539809	3.02716e-185	1.02058e-180	0.8	0.602	2
SEC14L1	0.394286	1.23826e-184	4.17468e-180	0.299	0.099	2
UCP2	0.618618	2.73794e-181	9.23068e-177	0.679	0.447	2
CD2	0.482811	7.39615e-180	2.49354e-175	0.87	0.694	2
FAM53B	0.348914	2.34288e-179	7.89877e-175	0.278	0.088	2
HLA-DPB1	0.47031	5.16516e-179	1.74138e-174	0.583	0.301	2
RAP1A	0.485736	8.49147e-179	2.86281e-174	0.681	0.429	2
BCL2L1	0.39313	1.43633e-177	4.84245e-173	0.259	0.079	2
RHOG	0.502116	1.52055e-177	5.12637e-173	0.677	0.431	2
TRAF1	0.429067	1.17939e-174	3.97618e-170	0.362	0.141	2
COX5A	0.561568	2.63489e-173	8.88328e-169	0.649	0.41	2
IL10RA	0.492994	1.29137e-171	4.35374e-167	0.596	0.34	2
FRMD4B	0.405506	7.16944e-171	2.4171e-166	0.262	0.081	2
ARL6IP5	0.458423	1.62299e-169	5.47176e-165	0.805	0.608	2
PGAM1	0.565677	8.04771e-169	2.71321e-164	0.613	0.382	2
ZBTB38	0.407507	2.30063e-168	7.75634e-164	0.426	0.187	2
ISG20	0.56936	2.42158e-168	8.16411e-164	0.742	0.536	2
RAC2	0.448365	9.43022e-168	3.1793e-163	0.874	0.726	2
YWHAB	0.435035	1.21739e-167	4.1043e-163	0.853	0.694	2
SYNGR2	0.669896	1.36437e-165	4.59984e-161	0.524	0.298	2
CD82	0.483043	2.42217e-165	8.16609e-161	0.514	0.258	2
CFLAR	0.52544	8.3659e-165	2.82048e-160	0.602	0.361	2
TNIP1	0.458838	1.9726e-164	6.65043e-160	0.516	0.272	2
BTG3	0.440959	1.03285e-163	3.48213e-159	0.388	0.165	2
ZC3H12D	0.328033	1.59989e-163	5.39388e-159	0.288	0.098	2
PBXIP1	0.50472	2.41645e-163	8.14683e-159	0.691	0.466	2
MAST4	0.375228	1.42439e-162	4.8022e-158	0.282	0.097	2
LFNG	0.42861	2.04506e-162	6.89472e-158	0.32	0.121	2
CREM	0.500073	2.4987e-160	8.42413e-156	0.665	0.397	2
HNRNPLL	0.401521	6.8721e-159	2.31686e-154	0.437	0.2	2
BIRC3	0.615508	7.02586e-159	2.3687e-154	0.667	0.419	2
IFI6	0.707694	1.50858e-158	5.08604e-154	0.514	0.271	2
FAM110A	0.339301	1.92643e-157	6.49478e-153	0.267	0.089	2
AKIRIN2	0.476151	2.32301e-157	7.83179e-153	0.453	0.224	2
SNX9	0.520411	5.96156e-157	2.00988e-152	0.487	0.253	2
ISG15	0.711647	4.12766e-156	1.3916e-151	0.584	0.326	2
SQSTM1	0.518879	2.70055e-155	9.10463e-151	0.668	0.449	2
LGALS3	0.529544	6.95086e-154	2.34341e-149	0.426	0.195	2
GALM	0.357996	4.33002e-153	1.45982e-148	0.373	0.155	2
EFHD2	0.495769	2.08145e-151	7.0174e-147	0.495	0.265	2
PSMB8	0.445552	2.79698e-151	9.42975e-147	0.694	0.474	2
SGMS1	0.311894	4.26734e-151	1.43869e-146	0.261	0.088	2
IL21R	0.483627	3.12488e-149	1.05352e-144	0.347	0.148	2
SERPINB9	0.473019	4.72736e-149	1.59378e-144	0.389	0.176	2
CKLF	0.472366	7.7032e-149	2.59706e-144	0.637	0.39	2
SOD1	0.445926	2.55645e-147	8.61883e-143	0.854	0.712	2
PARK7	0.461889	7.7017e-147	2.59655e-142	0.721	0.513	2
HLA-DRA	0.509595	3.95718e-145	1.33412e-140	0.418	0.191	2
TPP1	0.380267	7.67755e-145	2.58841e-140	0.369	0.162	2
RFTN1	0.367959	4.61351e-144	1.5554e-139	0.358	0.155	2
UGP2	0.465878	9.25397e-144	3.11988e-139	0.507	0.274	2
TAP1	0.442307	1.67311e-143	5.64072e-139	0.594	0.362	2
LTA	0.48437	2.98051e-142	1.00485e-137	0.275	0.102	2
GTF3C6	0.402317	1.12276e-140	3.78526e-136	0.46	0.234	2
FKBP1A	0.461319	1.49708e-140	5.04725e-136	0.631	0.413	2
CSK	0.441868	4.38553e-140	1.47854e-135	0.615	0.401	2
PPP1CA	0.398135	5.13026e-140	1.72962e-135	0.713	0.5	2
MIIP	0.31717	8.9642e-140	3.02219e-135	0.289	0.109	2
RPS27L	0.517482	2.028e-139	6.8372e-135	0.676	0.455	2
SDF4	0.4251	3.09307e-139	1.0428e-134	0.501	0.282	2
POU2F2	0.356026	4.56774e-139	1.53997e-134	0.317	0.127	2
SEC11C	0.355372	4.20785e-138	1.41864e-133	0.497	0.262	2
SLAMF1	0.348708	1.14768e-137	3.8693e-133	0.344	0.145	2
TRAF3	0.317276	1.32018e-137	4.45086e-133	0.278	0.103	2
SKAP1	0.438237	1.43557e-137	4.83989e-133	0.638	0.419	2
ARHGDIB	0.338943	3.31344e-137	1.11709e-132	0.959	0.877	2
SMS	0.408383	2.2269e-135	7.50777e-131	0.352	0.155	2
PSMB3	0.414632	3.72487e-135	1.2558e-130	0.636	0.408	2
COX8A	0.397261	4.70259e-134	1.58543e-129	0.743	0.555	2
ARPC2	0.358507	7.03053e-134	2.37027e-129	0.885	0.774	2
CTSA	0.40274	1.76886e-133	5.96352e-129	0.46	0.239	2
LTB	0.541402	4.48378e-133	1.51166e-128	0.918	0.796	2
OTUD5	0.41083	8.16786e-133	2.75371e-128	0.375	0.176	2
TFRC	0.351226	2.59206e-132	8.73888e-128	0.279	0.106	2
LYST	0.337973	5.24972e-132	1.76989e-127	0.319	0.131	2
TMSB10	0.318645	7.16083e-132	2.4142e-127	0.997	0.975	2
TPI1	0.454422	1.18202e-131	3.98508e-127	0.75	0.558	2
CASK	0.350074	2.09975e-130	7.0791e-126	0.359	0.164	2
JAZF1	0.290162	6.7962e-130	2.29127e-125	0.271	0.101	2
PPP1R18	0.394756	1.66302e-129	5.60671e-125	0.603	0.372	2
PSMB9	0.39654	6.98872e-129	2.35618e-124	0.758	0.56	2
SAMSN1	0.398404	3.30198e-128	1.11323e-123	0.572	0.328	2
BST2	0.460104	1.8678e-126	6.2971e-122	0.55	0.331	2
STK17B	0.440491	2.89784e-126	9.76976e-122	0.764	0.591	2
C4orf48	0.403809	5.88071e-126	1.98262e-121	0.44	0.229	2
JAK1	0.397121	2.31273e-125	7.79715e-121	0.739	0.565	2
REL	0.562911	2.57086e-125	8.66739e-121	0.522	0.313	2
PTPN7	0.377216	3.65095e-125	1.23088e-120	0.534	0.303	2
HERPUD1	0.436275	9.29899e-125	3.13506e-120	0.611	0.389	2
SFT2D1	0.370948	2.2039e-124	7.43023e-120	0.401	0.196	2
TENT5C	0.432384	1.21193e-123	4.08591e-119	0.541	0.316	2
MXD4	0.366779	2.17418e-123	7.33002e-119	0.378	0.182	2
COMMD7	0.337377	5.94226e-123	2.00337e-118	0.423	0.213	2
CTSZ	0.313598	1.31878e-122	4.44613e-118	0.29	0.119	2
NDUFA13	0.356073	2.40278e-122	8.10073e-118	0.778	0.605	2
CD3D	0.334138	4.21661e-122	1.42159e-117	0.93	0.806	2
IFNAR2	0.31668	5.04379e-122	1.70046e-117	0.394	0.19	2
DOK2	0.400451	5.27485e-121	1.77836e-116	0.529	0.308	2
EZR	0.387626	1.45992e-120	4.92196e-116	0.728	0.522	2
RAC1	0.368759	1.67674e-120	5.65297e-116	0.665	0.459	2
RHOH	0.429147	1.86662e-120	6.29314e-116	0.71	0.5	2
DYNLL1	0.353776	3.9907e-120	1.34543e-115	0.707	0.481	2
USP15	0.380489	8.54181e-119	2.87979e-114	0.607	0.392	2
SLA	0.384833	1.16665e-118	3.93325e-114	0.458	0.244	2
NDUFV2	0.395769	8.11042e-118	2.73435e-113	0.616	0.414	2
ATOX1	0.349846	1.10304e-117	3.7188e-113	0.327	0.148	2
PAK2	0.404786	2.69302e-117	9.07926e-113	0.593	0.39	2
CD59	0.361606	3.40868e-115	1.1492e-110	0.342	0.159	2
TXNDC17	0.336323	4.39091e-115	1.48035e-110	0.363	0.171	2
GBP4	0.325389	5.99711e-115	2.02187e-110	0.336	0.153	2
CFL1	0.268225	1.0425e-114	3.51468e-110	0.966	0.905	2
MAN1A2	0.313847	3.98082e-114	1.34209e-109	0.326	0.148	2
PIM3	0.541837	6.91313e-114	2.33069e-109	0.537	0.339	2
HAPLN3	0.326012	9.92915e-114	3.34751e-109	0.257	0.102	2
ARPC3	0.310984	1.18494e-113	3.99491e-109	0.858	0.727	2
TANK	0.363611	1.52276e-113	5.13383e-109	0.449	0.238	2
MRPS6	0.394616	2.56645e-113	8.65252e-109	0.457	0.252	2
LCK	0.351012	6.14021e-113	2.07011e-108	0.806	0.649	2
ARPC4	0.342189	3.24191e-112	1.09298e-107	0.625	0.415	2
USP12	0.263609	3.61015e-111	1.21713e-106	0.255	0.101	2
SH3BGRL	0.350184	3.82885e-111	1.29086e-106	0.635	0.429	2
CXCR3	0.368344	1.61293e-110	5.43784e-106	0.377	0.179	2
ACTG1	0.343094	1.93889e-110	6.53677e-106	0.95	0.895	2
PRDX1	0.353612	5.34099e-110	1.80066e-105	0.659	0.462	2
PTPN22	0.285287	3.16461e-109	1.06692e-104	0.355	0.166	2
MAPKAPK3	0.300313	3.39566e-109	1.14481e-104	0.301	0.133	2
RHOA	0.334041	6.9726e-109	2.35074e-104	0.798	0.66	2
APOBEC3C	0.317139	1.13635e-108	3.83108e-104	0.326	0.147	2
GNG5	0.375799	2.85384e-108	9.62143e-104	0.592	0.399	2
SURF4	0.328515	3.5026e-108	1.18087e-103	0.436	0.239	2
TXN	0.361267	8.2142e-108	2.76934e-103	0.624	0.4	2
COX17	0.381557	2.41703e-107	8.14876e-103	0.472	0.271	2
HOXB2	0.311595	2.71041e-107	9.13787e-103	0.274	0.114	2
FOXO1	0.417865	5.51809e-106	1.86037e-101	0.5	0.313	2
P2RY10	0.330143	5.96497e-106	2.01103e-101	0.458	0.25	2
H3F3A	0.251628	7.83339e-106	2.64095e-101	0.937	0.855	2
MX1	0.464573	2.91964e-105	9.84329e-101	0.396	0.208	2
SUB1	0.334933	3.41018e-104	1.14971e-99	0.851	0.721	2
LY6E	0.458944	5.44359e-104	1.83525e-99	0.734	0.575	2
AHR	0.313483	8.22619e-104	2.77338e-99	0.33	0.156	2
ATP5F1E	0.283377	9.13578e-104	3.08004e-99	0.945	0.883	2
CYBA	0.286137	2.87427e-103	9.69032e-99	0.904	0.794	2
HPRT1	0.32	3.49752e-103	1.17915e-98	0.34	0.165	2
NUDT5	0.312781	4.5184e-103	1.52333e-98	0.36	0.178	2
CORO1A	0.320224	7.66337e-103	2.58363e-98	0.924	0.816	2
UBE2D2	0.317748	1.16061e-102	3.91288e-98	0.766	0.593	2
AC008105.3	0.350721	1.42704e-102	4.81111e-98	0.347	0.171	2
GRSF1	0.380526	2.45687e-102	8.2831e-98	0.441	0.256	2
HLA-E	0.250499	2.66377e-102	8.98064e-98	0.97	0.917	2
PSMD8	0.341415	2.74588e-102	9.25745e-98	0.58	0.38	2
CCND2	0.435867	7.33936e-102	2.47439e-97	0.481	0.295	2
CMTM3	0.334431	4.53729e-101	1.5297e-96	0.457	0.258	2
YWHAH	0.305329	1.32464e-100	4.46588e-96	0.385	0.197	2
ID3	0.582398	1.72277e-100	5.80814e-96	0.311	0.146	2
PSMB6	0.339597	1.06189e-99	3.58006e-95	0.534	0.337	2
CMTM6	0.380038	1.0978e-99	3.70111e-95	0.461	0.265	2
VOPP1	0.317447	1.18734e-99	4.00299e-95	0.435	0.242	2
LIMA1	0.265974	1.68336e-99	5.67528e-95	0.254	0.106	2
HCLS1	0.333034	3.45197e-99	1.1638e-94	0.716	0.547	2
MAP2K3	0.361446	3.56324e-99	1.20131e-94	0.354	0.18	2
IQGAP1	0.359999	5.63846e-99	1.90095e-94	0.559	0.371	2
BCL3	0.405165	1.02663e-98	3.46119e-94	0.389	0.211	2
GATA3	0.470781	3.39745e-98	1.14542e-93	0.488	0.295	2
FMNL1	0.339118	1.02467e-97	3.45456e-93	0.582	0.39	2
C17orf49	0.360472	1.07097e-97	3.61068e-93	0.529	0.328	2
ZC3H7A	0.290122	1.17017e-97	3.94511e-93	0.322	0.155	2
JPT1	0.312706	1.20921e-97	4.07673e-93	0.533	0.327	2
LDLRAD4	0.269469	1.06416e-96	3.5877e-92	0.366	0.186	2
GNG2	0.329022	1.30558e-96	4.40163e-92	0.525	0.32	2
TERF2IP	0.335631	1.56803e-96	5.28646e-92	0.639	0.44	2
CDV3	0.386997	1.61198e-96	5.43465e-92	0.554	0.377	2
NOP10	0.342822	1.87441e-96	6.3194e-92	0.585	0.394	2
PRR13	0.325746	1.67184e-95	5.63646e-91	0.722	0.548	2
RAB10	0.294157	2.23801e-95	7.54521e-91	0.386	0.207	2
TLK1	0.334172	5.90593e-95	1.99112e-90	0.476	0.284	2
TAB2	0.341549	7.87032e-95	2.6534e-90	0.404	0.224	2
PSAP	0.352533	1.71821e-94	5.79277e-90	0.613	0.441	2
NDUFB8	0.308715	3.47044e-94	1.17002e-89	0.687	0.508	2
TMEM173	0.346495	3.04946e-93	1.02809e-88	0.515	0.326	2
ANKRD10	0.353554	5.00305e-93	1.68673e-88	0.379	0.207	2
TMEM50A	0.301111	1.14879e-92	3.87303e-88	0.635	0.44	2
LGALS1	0.681253	2.61222e-92	8.80683e-88	0.451	0.268	2
SHMT2	0.326082	3.91807e-92	1.32094e-87	0.29	0.139	2
HLA-F	0.315681	5.00497e-92	1.68737e-87	0.702	0.522	2
IFI27L2	0.283801	5.10239e-92	1.72022e-87	0.377	0.199	2
WDR1	0.344498	7.65044e-92	2.57927e-87	0.602	0.424	2
CD83	0.513616	9.96565e-92	3.35982e-87	0.264	0.12	2
GNAI2	0.358392	1.42387e-91	4.80044e-87	0.653	0.495	2
MAT2B	0.344742	2.36102e-91	7.95995e-87	0.507	0.324	2
COX5B	0.301055	1.08168e-90	3.64679e-86	0.764	0.616	2
SIT1	0.333231	1.59826e-90	5.38838e-86	0.493	0.3	2
C9orf16	0.35979	3.22948e-90	1.08879e-85	0.685	0.516	2
SH3KBP1	0.316756	4.21112e-90	1.41974e-85	0.584	0.393	2
VAMP5	0.313666	4.80623e-90	1.62037e-85	0.444	0.255	2
TPM3	0.304087	4.88986e-90	1.64857e-85	0.778	0.629	2
PDIA6	0.348972	8.56609e-90	2.88797e-85	0.483	0.296	2
ELOVL5	0.305843	1.59099e-89	5.36386e-85	0.47	0.281	2
PSMB1	0.312081	1.64084e-89	5.53194e-85	0.669	0.492	2
CD4	0.342906	2.88319e-89	9.7204e-85	0.505	0.321	2
SQOR	0.265768	3.89631e-89	1.3136e-84	0.324	0.159	2
VCP	0.327509	4.10565e-89	1.38418e-84	0.598	0.42	2
IFI35	0.278402	5.27732e-89	1.7792e-84	0.303	0.144	2
TPM4	0.32329	7.51773e-89	2.53453e-84	0.502	0.31	2
ATP5MF	0.30875	1.14327e-88	3.85443e-84	0.626	0.449	2
CACYBP	0.402864	1.51e-88	5.09081e-84	0.615	0.446	2
NINJ1	0.40733	4.78082e-88	1.61181e-83	0.329	0.171	2
TNIP2	0.31157	5.20582e-88	1.75509e-83	0.336	0.173	2
ARF1	0.2808	8.06119e-87	2.71775e-82	0.734	0.566	2
ARPP19	0.291675	1.81368e-86	6.11463e-82	0.363	0.195	2
PSME2	0.334497	1.99383e-86	6.72201e-82	0.702	0.54	2
GRINA	0.308733	3.34116e-86	1.12644e-81	0.313	0.159	2
TMBIM6	0.297069	3.51109e-86	1.18373e-81	0.773	0.639	2
TRAC	0.52137	5.02516e-86	1.69418e-81	0.809	0.62	2
MTHFD2	0.280252	8.5833e-86	2.89377e-81	0.332	0.17	2
BUB3	0.287681	1.00729e-85	3.39598e-81	0.552	0.359	2
SNX5	0.278171	1.94709e-85	6.5644e-81	0.365	0.199	2
PHPT1	0.345489	2.43083e-85	8.19531e-81	0.415	0.238	2
HNRNPK	0.281459	3.97514e-85	1.34018e-80	0.82	0.686	2
COPE	0.307878	4.6632e-85	1.57215e-80	0.63	0.457	2
COMMD3	0.263531	8.48567e-85	2.86086e-80	0.302	0.147	2
AFTPH	0.259442	8.91882e-85	3.00689e-80	0.289	0.139	2
TCIRG1	0.265197	1.38365e-84	4.66482e-80	0.402	0.226	2
STAT1	0.449674	2.15714e-84	7.27259e-80	0.514	0.333	2
CLTB	0.284818	4.23011e-84	1.42614e-79	0.46	0.277	2
PSMA7	0.291139	5.46804e-84	1.8435e-79	0.759	0.606	2
ANXA7	0.299862	9.27861e-84	3.12819e-79	0.478	0.296	2
PSMA6	0.312598	1.63952e-83	5.52747e-79	0.546	0.365	2
UBE2B	0.352688	3.15242e-83	1.06281e-78	0.625	0.455	2
FCMR	0.407709	7.3269e-83	2.47019e-78	0.606	0.436	2
ARL6IP1	0.268991	7.84237e-83	2.64398e-78	0.629	0.454	2
LASP1	0.27081	1.01817e-82	3.43266e-78	0.353	0.19	2
PSMA5	0.305202	1.0702e-82	3.60808e-78	0.501	0.321	2
LPXN	0.311047	1.6521e-82	5.5699e-78	0.454	0.276	2
TBCB	0.304116	1.95524e-82	6.59189e-78	0.538	0.353	2
TAGLN2	0.30837	4.15082e-82	1.39941e-77	0.785	0.632	2
ASXL1	0.315383	4.26441e-82	1.4377e-77	0.473	0.299	2
CD28	0.293566	4.83737e-82	1.63087e-77	0.461	0.282	2
SP100	0.322653	5.33637e-82	1.79911e-77	0.617	0.443	2
RBX1	0.305898	6.96907e-82	2.34955e-77	0.529	0.341	2
HDAC7	0.313306	1.5015e-81	5.06215e-77	0.347	0.19	2
SAMHD1	0.363853	2.65352e-81	8.94609e-77	0.543	0.368	2
TRAPPC1	0.293619	1.06036e-80	3.57489e-76	0.617	0.434	2
CCDC167	0.268779	1.09308e-80	3.6852e-76	0.285	0.137	2
GABARAP	0.269096	2.6884e-80	9.06366e-76	0.799	0.669	2
ARF6	0.320295	5.01731e-80	1.69154e-75	0.673	0.514	2
RNF213	0.339337	5.88008e-80	1.98241e-75	0.675	0.515	2
CYTIP	0.351402	3.0309e-79	1.02184e-74	0.75	0.612	2
RALGDS	0.26499	3.09951e-79	1.04497e-74	0.371	0.206	2
UXS1	0.261066	4.20059e-79	1.41619e-74	0.325	0.169	2
FAM49B	0.2914	6.01782e-79	2.02885e-74	0.538	0.358	2
NCOA3	0.291751	7.57163e-79	2.5527e-74	0.309	0.161	2
G3BP2	0.341547	7.90117e-79	2.6638e-74	0.594	0.421	2
LAP3	0.25032	1.08948e-78	3.67307e-74	0.298	0.15	2
FYN	0.32231	1.25318e-78	4.22497e-74	0.679	0.527	2
STARD7	0.306648	1.29515e-78	4.36647e-74	0.369	0.211	2
BRK1	0.305533	1.95395e-78	6.58754e-74	0.663	0.499	2
RNASEK	0.292244	6.35094e-78	2.14116e-73	0.786	0.652	2
IRF9	0.268237	6.56607e-78	2.21369e-73	0.512	0.325	2
DBI	0.292286	8.19771e-78	2.76378e-73	0.579	0.4	2
OPTN	0.278807	1.46047e-77	4.92383e-73	0.489	0.309	2
N4BP1	0.257669	1.88407e-77	6.35197e-73	0.332	0.176	2
PFKFB3	0.337608	2.46485e-77	8.30999e-73	0.315	0.165	2
GPI	0.324864	3.20416e-77	1.08025e-72	0.49	0.325	2
TMED9	0.276132	3.76136e-77	1.26811e-72	0.488	0.311	2
LIMS1	0.271887	5.71797e-77	1.92776e-72	0.419	0.243	2
GABARAPL1	0.268609	6.40411e-77	2.15908e-72	0.304	0.156	2
RBM38	0.378074	7.50792e-77	2.53122e-72	0.535	0.368	2
AP2M1	0.267832	8.82201e-77	2.97425e-72	0.534	0.355	2
TNIK	0.260868	9.49977e-77	3.20275e-72	0.395	0.229	2
ATP6V0E1	0.278368	1.07538e-76	3.62552e-72	0.768	0.617	2
TMBIM4	0.2791	1.29355e-76	4.36109e-72	0.57	0.391	2
ALDOA	0.372454	2.22162e-76	7.48998e-72	0.544	0.386	2
UBE2N	0.276833	5.75462e-76	1.94011e-71	0.521	0.342	2
SH2D1A	0.281747	5.79918e-76	1.95514e-71	0.356	0.195	2
UBE2L6	0.308983	1.70884e-75	5.7612e-71	0.502	0.328	2
COX6A1	0.252451	2.0609e-75	6.94811e-71	0.795	0.66	2
ADRM1	0.279518	2.17253e-75	7.32447e-71	0.467	0.295	2
ECH1	0.271087	3.4464e-75	1.16192e-70	0.522	0.343	2
PSMB10	0.28084	4.36869e-75	1.47286e-70	0.589	0.409	2
ZNF292	0.291393	8.26369e-75	2.78602e-70	0.462	0.293	2
IFI16	0.271853	9.168e-75	3.0909e-70	0.503	0.317	2
LCP2	0.337566	1.70021e-74	5.73209e-70	0.614	0.457	2
WDR83OS	0.288168	2.26354e-74	7.63129e-70	0.608	0.445	2
MT2A	0.258257	2.60577e-74	8.78508e-70	0.527	0.351	2
ICAM3	0.28954	3.15616e-74	1.06407e-69	0.687	0.527	2
POMP	0.297465	4.62597e-74	1.5596e-69	0.568	0.395	2
CHMP2A	0.258765	5.68778e-74	1.91758e-69	0.439	0.266	2
CCM2	0.276679	1.1796e-73	3.9769e-69	0.405	0.242	2
PSMA2	0.329862	1.3336e-73	4.4961e-69	0.567	0.4	2
LRP10	0.277868	2.27215e-73	7.66033e-69	0.465	0.295	2
ATP5IF1	0.289807	2.86878e-73	9.67179e-69	0.659	0.499	2
HNRNPA3	0.273255	7.76198e-73	2.61687e-68	0.692	0.542	2
MBD2	0.26796	9.5485e-73	3.21918e-68	0.356	0.205	2
B3GNT2	0.262953	1.82461e-72	6.15148e-68	0.293	0.152	2
PPP4C	0.267089	2.29833e-72	7.74858e-68	0.488	0.319	2
WSB1	0.293801	1.59657e-71	5.38269e-67	0.559	0.396	2
ARHGAP9	0.292731	3.42713e-71	1.15542e-66	0.531	0.362	2
CDKN1B	0.341333	1.01495e-70	3.42179e-66	0.567	0.401	2
APBB1IP	0.293181	1.75171e-70	5.90573e-66	0.582	0.415	2
RASGRP1	0.277901	2.37144e-70	7.99507e-66	0.422	0.261	2
LMAN1	0.250512	3.89435e-70	1.31294e-65	0.39	0.229	2
MAP1LC3B	0.281253	5.96196e-70	2.01001e-65	0.589	0.419	2
MGAT1	0.250771	8.42716e-70	2.84113e-65	0.352	0.198	2
HSPA1A	0.287989	9.77723e-70	3.2963e-65	0.524	0.322	2
TRBC2	0.381565	1.59223e-69	5.36804e-65	0.801	0.656	2
BCL2	0.296148	1.91189e-69	6.44573e-65	0.436	0.272	2
SASH3	0.259988	3.10522e-69	1.04689e-64	0.4	0.242	2
NDUFA4	0.259936	3.66804e-69	1.23664e-64	0.824	0.697	2
GADD45G	0.35498	4.0017e-69	1.34913e-64	0.251	0.122	2
PSMD4	0.256545	7.15732e-69	2.41302e-64	0.453	0.286	2
BAX	0.378809	8.47245e-69	2.8564e-64	0.554	0.395	2
ROMO1	0.288433	1.00757e-68	3.39693e-64	0.477	0.318	2
PCBP1	0.281184	6.62891e-68	2.23487e-63	0.772	0.652	2
ACTR3	0.284456	7.01553e-68	2.36521e-63	0.683	0.533	2
LAPTM4A	0.283559	1.2445e-67	4.19571e-63	0.455	0.293	2
TAX1BP1	0.263049	4.13337e-67	1.39352e-62	0.563	0.399	2
CAST	0.263549	5.01562e-67	1.69097e-62	0.541	0.369	2
CAP1	0.27981	5.31744e-67	1.79272e-62	0.655	0.505	2
RBPJ	0.280489	5.62508e-67	1.89644e-62	0.377	0.221	2
CCNDBP1	0.274986	1.02382e-66	3.45171e-62	0.428	0.267	2
MYO1G	0.268256	1.35439e-66	4.56618e-62	0.389	0.233	2
SELPLG	0.331834	1.36465e-66	4.60079e-62	0.493	0.338	2
NSD3	0.280073	1.71356e-66	5.77709e-62	0.625	0.466	2
RNF181	0.25275	1.91298e-66	6.44942e-62	0.399	0.241	2
CISD2	0.278414	1.98955e-66	6.70758e-62	0.308	0.168	2
NOP58	0.322851	3.69122e-66	1.24446e-61	0.507	0.354	2
PRDM2	0.266253	3.77616e-66	1.2731e-61	0.348	0.201	2
PPP2CA	0.268337	5.4472e-66	1.83647e-61	0.53	0.368	2
ATP5F1C	0.262252	6.15422e-66	2.07483e-61	0.543	0.383	2
CMTM7	0.296757	1.21566e-65	4.09848e-61	0.418	0.263	2
SMAP2	0.305361	3.88474e-65	1.3097e-60	0.601	0.443	2
CD53	0.254915	7.25538e-65	2.44608e-60	0.701	0.546	2
RNF187	0.25312	7.7116e-65	2.59989e-60	0.386	0.238	2
LAT	0.275814	1.03418e-64	3.48664e-60	0.7	0.553	2
VAMP8	0.290296	1.26127e-64	4.25225e-60	0.62	0.473	2
CLDND1	0.25436	1.32436e-64	4.46494e-60	0.44	0.277	2
NDUFA6	0.263816	1.38787e-64	4.67906e-60	0.476	0.315	2
GNB2	0.25998	1.57007e-64	5.29333e-60	0.576	0.421	2
ARF5	0.256608	1.97686e-64	6.6648e-60	0.519	0.36	2
SYNE2	0.300865	4.1148e-64	1.38726e-59	0.581	0.424	2
SLC25A3	0.269221	4.84237e-64	1.63256e-59	0.743	0.62	2
TTC39C	0.282529	1.79725e-63	6.05924e-59	0.47	0.315	2
PRNP	0.313161	9.61884e-63	3.2429e-58	0.448	0.298	2
TMEM59	0.255726	1.52427e-62	5.13892e-58	0.673	0.532	2
EID1	0.273893	1.73073e-62	5.83499e-58	0.658	0.517	2
SCAND1	0.292975	1.25812e-61	4.24162e-57	0.585	0.437	2
ANXA11	0.259539	7.16875e-60	2.41687e-55	0.607	0.467	2
GRB2	0.253401	7.72834e-60	2.60553e-55	0.499	0.349	2
LBH	0.325649	1.22164e-59	4.11863e-55	0.598	0.452	2
ATP5F1B	0.256054	2.40207e-59	8.09834e-55	0.679	0.543	2
CTNNB1	0.257655	3.31039e-59	1.11607e-54	0.344	0.207	2
CD247	0.263656	4.32632e-59	1.45858e-54	0.628	0.472	2
WNK1	0.254485	4.53036e-59	1.52737e-54	0.491	0.338	2
SERBP1	0.254439	6.31756e-58	2.1299e-53	0.677	0.54	2
ANP32A	0.250191	2.46279e-57	8.30305e-53	0.455	0.309	2
VDAC1	0.261929	2.10404e-56	7.09358e-52	0.445	0.298	2
ITM2A	0.302078	1.56326e-55	5.27039e-51	0.59	0.439	2
ZC3H12A	0.268674	1.96539e-54	6.62613e-50	0.316	0.187	2
PRDX5	0.260365	2.09803e-54	7.0733e-50	0.527	0.383	2
GLUD1	0.279082	7.50841e-54	2.53139e-49	0.396	0.258	2
PAIP2	0.272596	2.61849e-53	8.82796e-49	0.599	0.461	2
NFE2L2	0.259232	5.60867e-53	1.89091e-48	0.404	0.263	2
PGK1	0.304137	6.0757e-53	2.04836e-48	0.716	0.598	2
RANBP1	0.274035	1.68748e-52	5.68917e-48	0.453	0.313	2
CALR	0.356729	2.52495e-52	8.5126e-48	0.682	0.567	2
CNIH1	0.268878	4.92936e-52	1.66188e-47	0.422	0.286	2
DUSP2	0.313097	1.08964e-51	3.67362e-47	0.709	0.555	2
ZFP36L1	0.329599	5.04847e-51	1.70204e-46	0.71	0.588	2
GSTO1	0.250166	3.71432e-50	1.25225e-45	0.353	0.221	2
TRIM22	0.25188	1.04434e-49	3.52088e-45	0.475	0.331	2
MALT1	0.270162	5.63162e-48	1.89864e-43	0.373	0.245	2
YPEL3	0.252748	2.15305e-46	7.25879e-42	0.544	0.414	2
SLC3A2	0.25574	5.54325e-45	1.86885e-40	0.518	0.384	2
ETS1	0.267252	7.07784e-45	2.38622e-40	0.643	0.517	2
NFKB2	0.251079	1.6527e-43	5.57193e-39	0.368	0.247	2
TRBC1	0.397128	1.75457e-29	5.91534e-25	0.554	0.453	2
TUBB4B	0.50286	1.67398e-140	5.64365e-136	0.621	0.39	3
HMGB2	0.339587	8.94185e-93	3.01465e-88	0.605	0.401	3
JUNB	0.372497	9.3058e-90	3.13736e-85	0.939	0.887	3
TACC3	0.274845	8.13946e-70	2.74414e-65	0.354	0.202	3
DNAJB1	0.392246	5.4656e-54	1.84267e-49	0.797	0.715	3
CKS2	0.320793	1.31285e-53	4.42613e-49	0.288	0.166	3
FOS	0.323896	4.14349e-52	1.39694e-47	0.795	0.707	3
FOSB	0.359555	2.42803e-51	8.18587e-47	0.632	0.516	3
TCF7	0.253465	2.58524e-46	8.71589e-42	0.628	0.495	3
KLF2	0.434094	7.74582e-46	2.61143e-41	0.601	0.492	3
BTG2	0.343673	5.24866e-45	1.76953e-40	0.696	0.61	3
AREG	0.395625	1.40723e-44	4.74435e-40	0.339	0.215	3
YPEL5	0.326764	1.66882e-44	5.62628e-40	0.667	0.572	3
DUSP1	0.276639	2.18963e-44	7.38213e-40	0.817	0.745	3
JUN	0.357042	1.61291e-43	5.43775e-39	0.825	0.783	3
PPP1R15A	0.274217	7.43178e-42	2.50555e-37	0.723	0.635	3
ZFP36	0.301789	2.22365e-40	7.49683e-36	0.827	0.765	3
NR4A1	0.354148	1.27594e-29	4.3017e-25	0.341	0.244	3
JUND	0.276418	5.18971e-24	1.74966e-19	0.693	0.657	3
RGCC	0.277525	3.56061e-22	1.20042e-17	0.662	0.585	3
AL138963.4	0.273083	6.91602e-21	2.33167e-16	0.469	0.39	3
ANXA1	0.262256	2.54249e-13	8.57175e-09	0.652	0.584	3
RPS27A	0.277789	5.37169e-193	1.81101e-188	0.993	0.979	4
RPL32	0.293837	3.24732e-186	1.0948e-181	0.995	0.979	4
RPL34	0.332781	1.67159e-185	5.6356e-181	0.992	0.975	4
RPL11	0.267128	3.43297e-174	1.15739e-169	0.993	0.977	4
RPL13	0.256485	6.13023e-164	2.06675e-159	0.996	0.985	4
RPS14	0.268293	5.5399e-153	1.86772e-148	0.997	0.977	4
RPS27	0.295021	4.94889e-151	1.66847e-146	0.997	0.985	4
RPS25	0.262788	2.82297e-147	9.51736e-143	0.989	0.971	4
RPS13	0.287252	8.60488e-143	2.90105e-138	0.985	0.965	4
RPLP2	0.365185	9.84058e-143	3.31765e-138	0.989	0.973	4
RPS3A	0.275707	9.64486e-134	3.25167e-129	0.991	0.972	4
RPS6	0.32102	2.60893e-133	8.79576e-129	0.987	0.974	4
RPL21	0.404411	1.20841e-130	4.07405e-126	0.984	0.969	4
RPL9	0.298873	1.53553e-126	5.17689e-122	0.979	0.964	4
RPL35A	0.25001	4.34396e-122	1.46452e-117	0.981	0.965	4
RPL3	0.255849	2.92844e-106	9.87294e-102	0.988	0.973	4
RPL10A	0.26906	1.633e-105	5.50549e-101	0.968	0.956	4
EEF1G	0.328829	1.206e-102	4.06591e-98	0.94	0.929	4
RPL22	0.275207	5.03332e-101	1.69693e-96	0.933	0.928	4
RPS5	0.250819	1.06684e-99	3.59675e-95	0.974	0.952	4
RPL31	0.415872	4.16156e-95	1.40303e-90	0.947	0.928	4
RPL7	0.410824	1.41614e-94	4.77437e-90	0.947	0.929	4
RPL23A	0.295144	1.28737e-86	4.34025e-82	0.983	0.966	4
RPS29	0.390719	8.06479e-86	2.71896e-81	0.958	0.95	4
RPL38	0.320514	3.28779e-82	1.10845e-77	0.923	0.913	4
RPL13A	0.372505	2.13768e-78	7.20698e-74	0.965	0.952	4
RPL36A	0.269921	5.50202e-76	1.85495e-71	0.947	0.935	4
RPS20	0.409507	1.80126e-71	6.07277e-67	0.895	0.868	4
RPL27	0.254067	1.34192e-61	4.52414e-57	0.946	0.933	4
RPS17	0.393761	3.09531e-59	1.04355e-54	0.882	0.855	4
RPL27A	0.367135	3.48499e-59	1.17493e-54	0.926	0.91	4
RPS11	0.262893	2.73956e-53	9.23616e-49	0.922	0.915	4
SNHG29	0.264778	1.00233e-52	3.37924e-48	0.819	0.803	4
GAS5	0.28686	3.26178e-52	1.09968e-47	0.795	0.768	4
RPS10	0.396299	5.01433e-51	1.69053e-46	0.771	0.683	4
RPL23	0.283324	6.30353e-45	2.12517e-40	0.865	0.851	4
NOP53	0.267186	3.63087e-44	1.22411e-39	0.825	0.824	4
EIF3E	0.271414	2.54886e-32	8.59322e-28	0.755	0.749	4
SNHG5	0.265264	3.81428e-15	1.28595e-10	0.66	0.647	4
FTL	0.304953	7.81851e-15	2.63593e-10	0.948	0.954	4
ZFP36	0.794629	3.21386e-245	1.08352e-240	0.957	0.755	5
TNFAIP3	0.754727	2.32743e-207	7.84671e-203	0.887	0.638	5
FOS	0.771647	4.07988e-206	1.37549e-201	0.922	0.698	5
PPP1R15A	0.598686	2.18711e-198	7.37363e-194	0.892	0.622	5
MYADM	0.691308	2.98572e-195	1.00661e-190	0.722	0.397	5
KLF6	0.659028	3.31938e-181	1.1191e-176	0.944	0.772	5
DUSP1	0.683869	6.66327e-177	2.24645e-172	0.932	0.736	5
CDKN1A	0.73671	1.64237e-172	5.53707e-168	0.497	0.22	5
ZFP36L2	0.558627	3.51706e-169	1.18574e-164	0.963	0.831	5
DNAJA1	0.660423	3.75358e-165	1.26548e-160	0.863	0.598	5
CSRNP1	0.565259	9.67873e-164	3.26309e-159	0.736	0.444	5
FOSB	0.717529	2.0497e-159	6.91035e-155	0.779	0.506	5
ANXA1	0.665415	3.91704e-153	1.32059e-148	0.837	0.569	5
DNAJB1	0.723504	8.32159e-151	2.80554e-146	0.921	0.706	5
CD69	0.604498	6.88025e-149	2.31961e-144	0.894	0.666	5
JUNB	0.520849	1.65764e-148	5.58855e-144	0.989	0.883	5
HSPA8	0.527347	1.15889e-147	3.90706e-143	0.964	0.868	5
NR4A2	0.577488	2.51549e-146	8.48074e-142	0.757	0.48	5
JUN	0.700162	4.87427e-143	1.64331e-138	0.932	0.774	5
JUND	0.628127	1.54577e-140	5.21142e-136	0.861	0.642	5
VIM	0.499872	1.23655e-137	4.16891e-133	0.965	0.829	5
TUBB4B	0.47132	4.54426e-137	1.53205e-132	0.678	0.391	5
YPEL5	0.499306	1.9936e-133	6.72124e-129	0.819	0.561	5
LMNA	0.65878	3.41187e-132	1.15028e-127	0.59	0.312	5
UBE2S	0.491752	4.5184e-131	1.52333e-126	0.624	0.356	5
PTGER4	0.479445	9.32577e-131	3.14409e-126	0.677	0.398	5
SLC2A3	0.528746	1.84897e-129	6.23362e-125	0.806	0.572	5
UBC	0.385605	1.47467e-128	4.9717e-124	0.983	0.905	5
HSP90AA1	0.630754	6.24357e-127	2.10496e-122	0.952	0.854	5
AHNAK	0.503948	8.78572e-127	2.96202e-122	0.68	0.415	5
TSC22D3	0.485731	2.25563e-126	7.60463e-122	0.937	0.771	5
RGCC	0.632643	2.56606e-121	8.65122e-117	0.799	0.575	5
SERTAD1	0.467946	2.17458e-119	7.33138e-115	0.539	0.281	5
NFKBIA	0.493908	5.03155e-114	1.69634e-109	0.885	0.707	5
IER5	0.440975	1.61972e-111	5.46073e-107	0.546	0.301	5
NEU1	0.604328	2.52118e-107	8.49989e-103	0.481	0.256	5
IL7R	0.437049	3.30919e-104	1.11566e-99	0.878	0.678	5
HSP90AB1	0.484425	7.72857e-104	2.60561e-99	0.93	0.798	5
HSPA5	0.400642	8.80921e-104	2.96994e-99	0.761	0.535	5
IDS	0.37563	9.11611e-102	3.07341e-97	0.768	0.536	5
YWHAZ	0.350577	1.47442e-100	4.97086e-96	0.893	0.725	5
PNRC1	0.34052	3.52013e-98	1.18678e-93	0.935	0.803	5
DUSP2	0.451438	1.85475e-96	6.25311e-92	0.787	0.553	5
SRSF7	0.403411	8.28669e-96	2.79378e-91	0.883	0.734	5
KLF10	0.358263	1.18798e-94	4.00517e-90	0.386	0.187	5
H3F3B	0.32218	4.97222e-94	1.67634e-89	0.992	0.953	5
PER1	0.357822	3.29703e-93	1.11156e-88	0.463	0.246	5
BHLHE40	0.398407	2.76723e-92	9.32946e-88	0.425	0.214	5
PNP	0.366377	9.2317e-92	3.11238e-87	0.428	0.222	5
CITED2	0.484894	5.97306e-91	2.01376e-86	0.62	0.399	5
SMAD7	0.380832	9.50398e-90	3.20417e-85	0.499	0.28	5
BTG2	0.447093	1.3003e-89	4.38383e-85	0.809	0.602	5
HSPA1B	0.91513	4.26973e-89	1.4395e-84	0.614	0.398	5
NR4A1	0.547695	3.96673e-88	1.33734e-83	0.44	0.238	5
TENT5C	0.365316	5.94243e-88	2.00343e-83	0.559	0.322	5
MCL1	0.400554	9.1594e-88	3.088e-83	0.789	0.599	5
ADGRE5	0.386395	2.96643e-87	1.0001e-82	0.569	0.345	5
NR4A3	0.351057	2.02661e-86	6.83251e-82	0.314	0.14	5
TUBA1A	0.376007	3.71549e-86	1.25264e-81	0.746	0.533	5
TGFB1	0.352527	2.12951e-85	7.17943e-81	0.7	0.478	5
AL133415.1	0.316255	1.34122e-84	4.52179e-80	0.355	0.169	5
TAGLN2	0.358019	1.35649e-81	4.57326e-77	0.821	0.634	5
TNF	0.502416	3.29337e-81	1.11033e-76	0.301	0.133	5
DUSP5	0.29462	4.97869e-80	1.67851e-75	0.378	0.189	5
GADD45B	0.42017	1.36185e-78	4.59133e-74	0.644	0.422	5
EIF4A3	0.403936	4.28266e-78	1.44386e-73	0.534	0.324	5
CXCR4	0.414297	7.21492e-78	2.43244e-73	0.915	0.776	5
BTG1	0.27387	2.92974e-77	9.87731e-73	0.995	0.954	5
TSC22D2	0.321243	3.43167e-75	1.15695e-70	0.388	0.205	5
ZFP36L1	0.422419	4.22557e-75	1.42461e-70	0.773	0.586	5
IER2	0.397547	9.74989e-75	3.28708e-70	0.832	0.642	5
MIDN	0.320135	1.94868e-73	6.56978e-69	0.526	0.321	5
EZR	0.394436	1.03829e-72	3.5005e-68	0.722	0.529	5
DDX3X	0.299435	1.45913e-72	4.91931e-68	0.688	0.475	5
HSPH1	0.489114	1.8531e-71	6.24754e-67	0.564	0.368	5
NASP	0.257556	1.94594e-71	6.56053e-67	0.491	0.284	5
IFITM1	0.312389	2.05759e-71	6.93697e-67	0.828	0.627	5
IVNS1ABP	0.288743	6.4523e-71	2.17533e-66	0.512	0.31	5
ARL4C	0.369025	2.23437e-70	7.53297e-66	0.767	0.579	5
PLK3	0.28789	9.30905e-70	3.13845e-65	0.578	0.364	5
TAGAP	0.345802	9.83849e-70	3.31695e-65	0.647	0.424	5
KDM6B	0.284605	1.24859e-69	4.2095e-65	0.436	0.247	5
ARL4A	0.312475	6.86292e-68	2.31376e-63	0.502	0.306	5
AC020916.1	0.338671	2.32394e-67	7.83493e-63	0.455	0.263	5
ERN1	0.26829	2.48039e-64	8.36239e-60	0.359	0.19	5
ZC3H12A	0.29469	2.7925e-63	9.41462e-59	0.354	0.188	5
TIPARP	0.300501	9.53166e-62	3.2135e-57	0.369	0.204	5
ODC1	0.316798	3.28656e-61	1.10803e-56	0.559	0.376	5
AL138963.4	0.307239	4.1135e-61	1.38683e-56	0.59	0.381	5
GLIPR1	0.264075	1.17069e-59	3.94687e-55	0.504	0.31	5
BRD2	0.311276	1.31575e-59	4.43592e-55	0.669	0.474	5
UBB	0.341192	3.98951e-59	1.34502e-54	0.944	0.849	5
STOM	0.2582	7.91798e-59	2.66947e-54	0.345	0.184	5
FTH1	0.294054	1.34068e-58	4.51996e-54	0.995	0.976	5
AREG	0.411418	7.09517e-58	2.39207e-53	0.379	0.215	5
CRIP1	0.352849	5.04121e-57	1.69959e-52	0.895	0.758	5
SOCS1	0.285979	9.59434e-57	3.23464e-52	0.546	0.354	5
CCNH	0.254762	2.32612e-56	7.84227e-52	0.586	0.395	5
EIF5	0.261997	3.85355e-56	1.29919e-51	0.743	0.557	5
STK17A	0.258001	1.90489e-55	6.42214e-51	0.759	0.58	5
HSPA1A	0.97318	1.95857e-55	6.60313e-51	0.489	0.331	5
SBDS	0.266776	2.57035e-52	8.66569e-48	0.628	0.447	5
DDX3Y	0.266967	3.99336e-52	1.34632e-47	0.441	0.278	5
TUBA4A	0.319602	4.49702e-51	1.51613e-46	0.604	0.43	5
ELF1	0.253919	2.05493e-50	6.928e-46	0.739	0.561	5
DDIT4	0.33214	3.01415e-48	1.01619e-43	0.7	0.524	5
GPR183	0.268022	6.28874e-46	2.12018e-41	0.648	0.462	5
DNAAF2	0.263904	2.15932e-45	7.27994e-41	0.355	0.212	5
RGS2	0.30474	2.43794e-45	8.21927e-41	0.4	0.245	5
BAG3	0.311394	1.03865e-44	3.50171e-40	0.298	0.167	5
KLF2	0.299207	1.26723e-43	4.27233e-39	0.656	0.49	5
TOB1	0.259302	2.83647e-43	9.56288e-39	0.53	0.362	5
EGR1	0.607027	2.03366e-41	6.85627e-37	0.35	0.217	5
NFKBIZ	0.256787	1.11006e-40	3.74246e-36	0.547	0.385	5
ZNF331	0.289422	3.77091e-38	1.27132e-33	0.508	0.36	5
CYCS	0.270379	4.68197e-38	1.57848e-33	0.68	0.531	5
HSPD1	0.307236	2.2249e-34	7.50103e-30	0.639	0.489	5
RHOB	0.293964	2.43112e-18	8.19629e-14	0.267	0.188	5
KLF2	0.924307	1.39668e-244	4.70878e-240	0.845	0.48	6
PABPC1	0.465574	3.34025e-208	1.12613e-203	0.991	0.896	6
RPL30	0.332448	9.86021e-202	3.32427e-197	0.999	0.976	6
CD55	0.563533	4.57468e-197	1.54231e-192	0.709	0.324	6
AREG	0.667678	2.97204e-193	1.00199e-188	0.549	0.206	6
TCF7	0.564611	7.93447e-189	2.67503e-184	0.853	0.486	6
EEF1A1	0.294909	2.39564e-182	8.07667e-178	1	0.99	6
LEF1	0.537342	5.78411e-182	1.95006e-177	0.765	0.389	6
RPS12	0.321765	4.52723e-179	1.52631e-174	1	0.98	6
RPS13	0.326999	5.65781e-176	1.90747e-171	0.999	0.964	6
BACH2	0.38127	7.62742e-176	2.57151e-171	0.442	0.147	6
ACTN1	0.398667	2.16495e-175	7.2989e-171	0.495	0.177	6
RPS8	0.329153	4.07177e-175	1.37276e-170	1	0.974	6
FOSB	0.599031	1.13401e-172	3.8232e-168	0.836	0.507	6
JUNB	0.571099	5.44976e-168	1.83733e-163	0.991	0.885	6
FOS	0.602381	2.70241e-163	9.11089e-159	0.939	0.701	6
NR4A1	0.667097	6.178e-158	2.08285e-153	0.546	0.234	6
LYPD3	0.303562	9.69696e-157	3.26923e-152	0.287	0.075	6
JUN	0.625142	1.37328e-152	4.62988e-148	0.944	0.776	6
EEF1B2	0.365214	5.07429e-145	1.71075e-140	0.994	0.892	6
BTG2	0.595169	6.38509e-145	2.15267e-140	0.872	0.602	6
RPS3A	0.296809	3.07188e-144	1.03565e-139	1	0.972	6
JUND	0.589663	1.82788e-138	6.16253e-134	0.864	0.646	6
RPL32	0.262463	3.65594e-138	1.23256e-133	0.999	0.979	6
ABLIM1	0.421427	1.4057e-137	4.73917e-133	0.62	0.296	6
YPEL5	0.56688	5.25707e-135	1.77237e-130	0.833	0.565	6
CSRNP1	0.473042	1.53495e-132	5.17494e-128	0.776	0.447	6
SLC2A3	0.576285	1.18621e-128	3.99919e-124	0.853	0.573	6
RPL37	0.287263	4.57784e-127	1.54337e-122	0.997	0.96	6
RPS21	0.300217	2.2336e-125	7.53037e-121	0.995	0.941	6
RPS5	0.258138	3.13009e-122	1.05528e-117	0.999	0.951	6
RPS28	0.257706	3.16041e-122	1.0655e-117	0.999	0.971	6
AL138963.4	0.577164	2.44133e-121	8.23072e-117	0.69	0.378	6
SOCS3	0.533324	3.96793e-121	1.33775e-116	0.713	0.406	6
PNRC1	0.409029	9.00787e-120	3.03691e-115	0.949	0.804	6
TPT1	0.27684	2.40175e-119	8.09726e-115	1	0.976	6
SELL	0.417023	1.34257e-116	4.52634e-112	0.766	0.433	6
DUSP1	0.426937	9.58829e-116	3.2326e-111	0.94	0.74	6
TUBA1A	0.481048	1.01839e-115	3.43342e-111	0.803	0.534	6
ZBTB10	0.262339	2.2353e-108	7.53609e-104	0.352	0.132	6
ITGA6	0.28504	3.32018e-107	1.11937e-102	0.375	0.146	6
PPP1R15A	0.423309	7.82654e-107	2.63864e-102	0.874	0.629	6
MAML2	0.290201	9.79628e-106	3.30272e-101	0.508	0.234	6
ZFP36	0.449912	1.52967e-105	5.15714e-101	0.945	0.76	6
SATB1	0.346238	2.85256e-105	9.61713e-101	0.561	0.279	6
CD69	0.442653	5.19031e-105	1.74986e-100	0.904	0.67	6
CCR7	0.348502	8.61538e-103	2.90459e-98	0.767	0.435	6
COL18A1	0.253056	4.3975e-102	1.48257e-97	0.284	0.097	6
DNAJB1	0.455822	4.19262e-101	1.4135e-96	0.918	0.71	6
TRABD2A	0.257357	3.95182e-98	1.33232e-93	0.449	0.195	6
ZNF10	0.25043	6.9931e-97	2.35765e-92	0.322	0.121	6
NR4A2	0.448137	1.90322e-96	6.41653e-92	0.758	0.485	6
NELL2	0.300387	3.54796e-95	1.19616e-90	0.389	0.162	6
IL6ST	0.285568	1.02791e-93	3.46549e-89	0.585	0.304	6
SGK1	0.311863	6.95142e-93	2.3436e-88	0.37	0.154	6
CAMK4	0.285224	1.88957e-92	6.37048e-88	0.678	0.378	6
EGR1	0.498793	6.02865e-92	2.0325e-87	0.449	0.213	6
HIST1H4C	0.337489	3.58311e-91	1.20801e-86	0.709	0.433	6
MARCKSL1	0.266343	4.28137e-89	1.44342e-84	0.525	0.262	6
NFKBIA	0.417164	6.18983e-89	2.08684e-84	0.884	0.71	6
MAL	0.296813	1.11335e-88	3.75354e-84	0.6	0.314	6
RASGRP2	0.264655	9.55076e-88	3.21994e-83	0.581	0.298	6
TSC22D3	0.358524	9.64989e-88	3.25336e-83	0.951	0.773	6
AL135905.2	0.292047	7.24121e-87	2.4413e-82	0.408	0.187	6
TSPYL1	0.322936	1.36305e-86	4.5954e-82	0.614	0.348	6
ARRDC2	0.308375	9.25138e-86	3.11901e-81	0.504	0.255	6
NSMCE3	0.334758	1.14309e-85	3.85382e-81	0.611	0.345	6
EEF2	0.272148	2.06989e-85	6.97844e-81	0.979	0.89	6
IER2	0.458803	9.85672e-85	3.32309e-80	0.864	0.644	6
SERTAD1	0.320441	1.139e-83	3.84003e-79	0.544	0.286	6
MYADM	0.329357	1.16408e-83	3.92459e-79	0.7	0.405	6
GADD45B	0.350477	5.59062e-83	1.88482e-78	0.704	0.422	6
HOOK2	0.282305	1.22057e-82	4.11502e-78	0.403	0.187	6
NFKB1	0.286259	1.37984e-80	4.65201e-76	0.574	0.317	6
SBDS	0.317809	1.60638e-80	5.41574e-76	0.707	0.445	6
NOSIP	0.328979	8.84655e-80	2.98253e-75	0.739	0.471	6
S1PR1	0.284978	3.09476e-79	1.04337e-74	0.515	0.26	6
SARAF	0.266882	2.39971e-78	8.09039e-74	0.985	0.886	6
DDX3Y	0.250655	1.20049e-77	4.04734e-73	0.525	0.276	6
SNHG1	0.272599	1.49667e-77	5.04588e-73	0.538	0.293	6
PTGER4	0.348999	8.51572e-77	2.87099e-72	0.67	0.404	6
HSP90AB1	0.301919	1.64136e-76	5.53369e-72	0.945	0.799	6
UBALD2	0.309259	7.4477e-76	2.51092e-71	0.702	0.433	6
ARMH1	0.268204	1.91207e-71	6.44635e-67	0.334	0.147	6
MIDN	0.282516	8.91881e-67	3.00689e-62	0.561	0.322	6
LINC01578	0.311121	2.10839e-66	7.10821e-62	0.774	0.538	6
RHOB	0.335547	2.54814e-65	8.59081e-61	0.37	0.182	6
SMAP2	0.257845	3.63921e-65	1.22692e-60	0.707	0.443	6
ZNF331	0.298222	2.91928e-64	9.84205e-60	0.599	0.356	6
NFKBIZ	0.267358	2.5779e-61	8.69113e-57	0.62	0.383	6
ALG13	0.259014	4.35254e-59	1.46741e-54	0.447	0.242	6
RGCC	0.314652	5.07644e-57	1.71147e-52	0.8	0.579	6
H1FX	0.295807	1.184e-56	3.99174e-52	0.678	0.442	6
MYC	0.270734	5.4426e-53	1.83492e-48	0.35	0.178	6
TNFAIP3	0.267947	2.34569e-49	7.90825e-45	0.835	0.646	6
DDIT4	0.291979	3.43587e-33	1.15837e-28	0.71	0.527	6
MT-CO1	1.15637	0	0	0.988	0.985	7
MT-CO2	1.09662	0	0	0.973	0.981	7
MALAT1	1.10713	4.45624e-307	1.50238e-302	0.992	0.991	7
MT-CYB	1.07366	2.83884e-299	9.57086e-295	0.949	0.966	7
MT-ATP6	1.07324	5.31679e-296	1.7925e-291	0.946	0.967	7
MT-CO3	1.06016	9.61426e-294	3.24135e-289	0.958	0.971	7
MT-ND3	1.11236	1.09938e-239	3.70644e-235	0.879	0.927	7
MT-ND4	1.03073	1.48363e-216	5.00191e-212	0.919	0.944	7
MT-ND1	0.991917	9.66837e-213	3.25959e-208	0.907	0.934	7
MT-ND2	1.05735	1.4019e-190	4.72638e-186	0.925	0.937	7
MT-ND5	1.03614	2.29711e-119	7.74449e-115	0.755	0.817	7
NEAT1	1.17349	1.10227e-55	3.71618e-51	0.595	0.613	7
MT-ND4L	1.15172	1.43244e-51	4.82932e-47	0.603	0.626	7
MTRNR2L12	1.34359	4.26597e-51	1.43823e-46	0.58	0.592	7
HSPD1	0.361057	7.86048e-27	2.65008e-22	0.249	0.517	7
SYTL1	0.251134	2.3188e-25	7.8176e-21	0.153	0.347	7
TMC6	0.257716	1.06513e-24	3.59097e-20	0.177	0.386	7
DDX46	0.268554	3.58797e-24	1.20965e-19	0.162	0.357	7
SQSTM1	0.355624	5.04736e-24	1.70167e-19	0.236	0.488	7
DNAJB6	0.308653	1.43918e-23	4.85204e-19	0.217	0.45	7
MBP	0.254818	3.47165e-23	1.17043e-18	0.186	0.394	7
KPNB1	0.255392	4.01328e-23	1.35304e-18	0.172	0.371	7
TECR	0.290814	1.58688e-22	5.35002e-18	0.237	0.488	7
TRA2B	0.272567	5.39594e-22	1.81919e-17	0.251	0.506	7
HSPA9	0.31387	1.43098e-21	4.82439e-17	0.204	0.42	7
ATP1A1	0.326806	2.33896e-21	7.88555e-17	0.216	0.445	7
PHF1	0.267266	2.80787e-21	9.46645e-17	0.155	0.333	7
GGNBP2	0.260707	3.44758e-21	1.16232e-16	0.16	0.339	7
PPP1R2	0.259674	3.45928e-21	1.16626e-16	0.286	0.565	7
NSD3	0.285301	4.93109e-21	1.66247e-16	0.249	0.498	7
NR3C1	0.251865	3.34842e-20	1.12889e-15	0.233	0.45	7
PTGER4	0.255196	6.87779e-20	2.31878e-15	0.228	0.433	7
KTN1	0.258505	8.99366e-20	3.03212e-15	0.206	0.413	7
NOP58	0.259485	9.97047e-20	3.36145e-15	0.19	0.382	7
FUS	0.787202	1.06089e-19	3.57668e-15	0.542	0.706	7
PRMT2	0.321468	2.37585e-19	8.00995e-15	0.202	0.407	7
ADAR	0.257779	2.87299e-19	9.68599e-15	0.215	0.429	7
CCDC12	0.340724	3.35609e-19	1.13147e-14	0.17	0.349	7
SNHG1	0.279916	3.86082e-19	1.30164e-14	0.153	0.319	7
HLA-F	0.268279	4.02115e-19	1.35569e-14	0.289	0.557	7
PRKCQ-AS1	0.25829	6.89741e-19	2.32539e-14	0.157	0.322	7
SIGIRR	0.326403	8.66452e-19	2.92116e-14	0.22	0.437	7
SHFL	0.283575	1.30549e-18	4.40134e-14	0.148	0.306	7
SKAP1	0.286157	1.42066e-18	4.7896e-14	0.233	0.457	7
LRRFIP1	0.359213	1.83788e-18	6.19624e-14	0.278	0.537	7
FMNL1	0.313316	2.04056e-18	6.87956e-14	0.215	0.423	7
TAF1D	0.330014	2.74802e-18	9.26468e-14	0.228	0.451	7
SLC38A1	0.3379	3.78932e-18	1.27753e-13	0.224	0.441	7
SRSF4	0.275467	4.11247e-18	1.38648e-13	0.156	0.32	7
PBXIP1	0.318567	4.56989e-18	1.54069e-13	0.263	0.506	7
DGKZ	0.304578	4.84106e-18	1.63211e-13	0.161	0.329	7
ARHGAP45	0.291051	8.79635e-18	2.9656e-13	0.239	0.465	7
CNOT6L	0.32997	9.18155e-18	3.09547e-13	0.151	0.306	7
PACS1	0.25593	1.00671e-17	3.39402e-13	0.136	0.284	7
SAMHD1	0.315257	1.05179e-17	3.54602e-13	0.204	0.399	7
RASGRP1	0.262886	1.39844e-17	4.71469e-13	0.14	0.288	7
PPP1R12A	0.287472	2.59904e-17	8.7624e-13	0.183	0.362	7
ATF6B	0.273599	2.79454e-17	9.42152e-13	0.133	0.278	7
BAZ1A	0.315181	3.00701e-17	1.01378e-12	0.195	0.382	7
TRABD	0.325583	3.4073e-17	1.14874e-12	0.179	0.356	7
ANAPC5	0.295107	3.90303e-17	1.31587e-12	0.17	0.341	7
TACC1	0.259923	4.42242e-17	1.49097e-12	0.126	0.263	7
ARID5B	0.271656	4.65627e-17	1.56982e-12	0.228	0.422	7
MALT1	0.27202	5.98594e-17	2.0181e-12	0.128	0.267	7
IVNS1ABP	0.293233	6.34867e-17	2.14039e-12	0.17	0.336	7
CLDND1	0.261569	7.40921e-17	2.49794e-12	0.152	0.304	7
ZNF207	0.328704	7.41717e-17	2.50063e-12	0.184	0.362	7
PIK3IP1	0.259568	7.69411e-17	2.59399e-12	0.289	0.546	7
UBE3A	0.250112	8.18929e-17	2.76094e-12	0.138	0.282	7
EIF5B	0.348905	8.85878e-17	2.98665e-12	0.145	0.294	7
NUMA1	0.257322	1.09383e-16	3.68775e-12	0.126	0.263	7
PER1	0.291986	1.09547e-16	3.69327e-12	0.133	0.272	7
CD96	0.285363	1.15189e-16	3.88347e-12	0.21	0.403	7
DDX21	0.320661	1.22443e-16	4.12804e-12	0.199	0.385	7
ARHGAP9	0.276268	1.49952e-16	5.05549e-12	0.203	0.392	7
DEF6	0.292754	1.78199e-16	6.00779e-12	0.202	0.391	7
GPBP1	0.381768	1.82406e-16	6.14964e-12	0.237	0.454	7
SLTM	0.272334	2.60487e-16	8.78207e-12	0.178	0.348	7
DDX39A	0.305711	2.97789e-16	1.00396e-11	0.178	0.348	7
YME1L1	0.407395	5.45318e-16	1.83848e-11	0.184	0.358	7
NR4A2	0.255103	7.93989e-16	2.67685e-11	0.296	0.516	7
ADGRE5	0.38655	8.96186e-16	3.0214e-11	0.197	0.374	7
CYTH1	0.332977	1.42248e-15	4.79575e-11	0.215	0.408	7
NAMPT	0.261899	1.65769e-15	5.58873e-11	0.132	0.263	7
ANKHD1	0.336006	1.71635e-15	5.78651e-11	0.174	0.339	7
SUPT5H	0.333929	1.73711e-15	5.8565e-11	0.139	0.279	7
FGD3	0.297761	1.77364e-15	5.97964e-11	0.139	0.279	7
MCL1	0.260786	2.04841e-15	6.90601e-11	0.354	0.632	7
EIF3B	0.361758	2.49368e-15	8.40719e-11	0.122	0.251	7
PIAS1	0.260872	3.89115e-15	1.31186e-10	0.139	0.276	7
CFLAR	0.319548	4.89264e-15	1.6495e-10	0.213	0.399	7
RSF1	0.344167	5.04846e-15	1.70204e-10	0.176	0.339	7
NFKB2	0.260355	7.41857e-15	2.5011e-10	0.136	0.268	7
CHD3	0.334	1.02423e-14	3.4531e-10	0.162	0.312	7
CSNK1D	0.290244	1.68142e-14	5.66873e-10	0.128	0.255	7
BBX	0.316299	1.81455e-14	6.11756e-10	0.16	0.308	7
PPM1K	0.274391	1.82159e-14	6.14129e-10	0.132	0.261	7
KDM6B	0.370213	2.28504e-14	7.70379e-10	0.14	0.271	7
WNK1	0.333328	2.33082e-14	7.85811e-10	0.193	0.365	7
RASAL3	0.31657	2.61597e-14	8.81949e-10	0.206	0.385	7
ILF3	0.402409	3.63065e-14	1.22404e-09	0.214	0.403	7
LMBRD1	0.299679	3.91075e-14	1.31847e-09	0.137	0.268	7
LUC7L2	0.310832	4.22862e-14	1.42564e-09	0.174	0.328	7
IQGAP2	0.266317	5.66411e-14	1.9096e-09	0.154	0.293	7
MYLIP	0.29452	5.67878e-14	1.91454e-09	0.187	0.35	7
DPP7	0.39038	6.8431e-14	2.30708e-09	0.264	0.498	7
UBXN4	0.299841	6.96264e-14	2.34738e-09	0.251	0.464	7
POLR2A	0.370022	1.14713e-13	3.86744e-09	0.152	0.292	7
SPSB3	0.346163	1.43596e-13	4.84121e-09	0.186	0.348	7
ZNF331	0.256036	1.45828e-13	4.91645e-09	0.217	0.382	7
BPTF	0.374596	2.68775e-13	9.06148e-09	0.202	0.374	7
SMARCA2	0.332599	3.13882e-13	1.05822e-08	0.174	0.325	7
NIPBL	0.328465	4.37372e-13	1.47456e-08	0.169	0.315	7
SAFB2	0.3362	4.40642e-13	1.48558e-08	0.151	0.284	7
PRKCH	0.299514	4.51582e-13	1.52246e-08	0.227	0.414	7
IQGAP1	0.332949	4.77228e-13	1.60893e-08	0.222	0.403	7
WSB1	0.458945	5.5994e-13	1.88778e-08	0.232	0.426	7
RBMS1	0.379096	6.44721e-13	2.17361e-08	0.187	0.345	7
ITSN2	0.343446	6.57765e-13	2.21759e-08	0.177	0.329	7
ANKRD13D	0.311038	8.10756e-13	2.73338e-08	0.133	0.256	7
MTCH1	0.347669	8.14394e-13	2.74565e-08	0.178	0.329	7
ACIN1	0.28072	8.90939e-13	3.00371e-08	0.14	0.266	7
NCOR1	0.369416	1.18119e-12	3.98228e-08	0.249	0.454	7
SRSF10	0.381157	1.33094e-12	4.48713e-08	0.216	0.395	7
PPP4R3B	0.286471	1.45742e-12	4.91354e-08	0.138	0.262	7
PLK3	0.374379	1.74497e-12	5.88298e-08	0.218	0.392	7
TBRG1	0.339342	2.00483e-12	6.75908e-08	0.156	0.291	7
TRAF3IP3	0.338153	2.14811e-12	7.24215e-08	0.289	0.523	7
DDX3X	0.363391	2.24096e-12	7.55518e-08	0.281	0.506	7
IL10RA	0.330552	2.29786e-12	7.747e-08	0.212	0.378	7
BCLAF1	0.324823	2.45903e-12	8.29036e-08	0.268	0.483	7
RSBN1L	0.364041	2.78166e-12	9.37808e-08	0.163	0.301	7
FAM133B	0.389633	3.52271e-12	1.18765e-07	0.173	0.315	7
PRPF8	0.313318	4.14356e-12	1.39696e-07	0.192	0.349	7
CD6	0.300886	4.26374e-12	1.43748e-07	0.292	0.519	7
STK10	0.348768	4.37706e-12	1.47568e-07	0.182	0.332	7
PRPF38B	0.416587	6.09346e-12	2.05435e-07	0.28	0.502	7
ACAP2	0.309169	6.67695e-12	2.25107e-07	0.163	0.297	7
NFATC2	0.27292	8.97058e-12	3.02434e-07	0.152	0.278	7
PPP3CC	0.286906	1.17878e-11	3.97412e-07	0.145	0.267	7
IRF1	0.317446	1.31185e-11	4.42276e-07	0.333	0.575	7
LNPEP	0.32488	1.49111e-11	5.02712e-07	0.168	0.306	7
REL	0.380647	1.75481e-11	5.91616e-07	0.196	0.345	7
EIF5	0.301313	1.87888e-11	6.33447e-07	0.335	0.588	7
ESYT2	0.299502	2.15813e-11	7.27591e-07	0.155	0.282	7
ACADVL	0.300216	2.3207e-11	7.82401e-07	0.156	0.284	7
PAFAH1B1	0.302379	2.40333e-11	8.10258e-07	0.186	0.333	7
PRRC2B	0.336475	2.41905e-11	8.15558e-07	0.158	0.288	7
GLG1	0.384381	2.7412e-11	9.2417e-07	0.204	0.365	7
TPR	0.330851	2.98027e-11	1.00477e-06	0.244	0.431	7
STT3B	0.341959	3.87328e-11	1.30584e-06	0.186	0.334	7
PDS5A	0.310122	4.22358e-11	1.42394e-06	0.148	0.269	7
IRF9	0.436825	4.31498e-11	1.45475e-06	0.2	0.355	7
ATP2B1	0.333684	5.18214e-11	1.74711e-06	0.138	0.251	7
SENP6	0.300623	5.94159e-11	2.00315e-06	0.14	0.255	7
WASHC1	0.359801	6.16516e-11	2.07852e-06	0.177	0.317	7
CNOT2	0.303176	6.75816e-11	2.27845e-06	0.145	0.263	7
RBM39	0.674571	6.95058e-11	2.34332e-06	0.519	0.704	7
IFRD1	0.404755	7.17344e-11	2.41845e-06	0.196	0.346	7
CD46	0.324386	8.2166e-11	2.77015e-06	0.159	0.286	7
DHX36	0.448346	8.36062e-11	2.8187e-06	0.189	0.335	7
KDM5A	0.307242	8.64281e-11	2.91384e-06	0.144	0.26	7
USP3	0.339071	8.87102e-11	2.99078e-06	0.164	0.294	7
NEU1	0.394117	1.84677e-10	6.22619e-06	0.163	0.282	7
SEPTIN2	0.324733	2.05684e-10	6.93442e-06	0.167	0.296	7
RNMT	0.384753	3.57124e-10	1.20401e-05	0.174	0.306	7
PTPRC	0.538129	4.2867e-10	1.44522e-05	0.604	0.808	7
RHOT2	0.371009	4.43338e-10	1.49467e-05	0.145	0.26	7
BDP1	0.357158	5.12838e-10	1.72898e-05	0.154	0.272	7
SNRNP200	0.389106	5.61725e-10	1.8938e-05	0.177	0.31	7
MT-ND6	0.900899	5.84389e-10	1.97021e-05	0.373	0.411	7
TNFRSF25	0.383742	7.3853e-10	2.48988e-05	0.173	0.3	7
GPATCH8	0.319809	7.4164e-10	2.50037e-05	0.144	0.255	7
PTPN7	0.402885	9.26594e-10	3.12392e-05	0.196	0.337	7
EPB41	0.417211	1.00849e-09	3.40002e-05	0.224	0.39	7
RABGAP1L	0.32138	1.20579e-09	4.06518e-05	0.174	0.301	7
KAT6A	0.349225	1.36994e-09	4.6186e-05	0.148	0.259	7
IDS	0.377874	1.45523e-09	4.90615e-05	0.331	0.57	7
PNN	0.440892	1.51499e-09	5.10763e-05	0.216	0.376	7
ASXL1	0.386103	2.08256e-09	7.02115e-05	0.189	0.326	7
CLEC2D	0.457163	2.15893e-09	7.27863e-05	0.276	0.471	7
RNF19A	0.357726	2.48981e-09	8.39414e-05	0.161	0.275	7
USP16	0.404878	2.94857e-09	9.9408e-05	0.172	0.297	7
CD44	0.281227	3.16149e-09	0.000106586	0.409	0.716	7
SPTAN1	0.364588	3.38992e-09	0.000114288	0.221	0.377	7
PAG1	0.403803	3.39779e-09	0.000114553	0.195	0.336	7
SEMA4D	0.369609	3.51276e-09	0.000118429	0.197	0.34	7
JAK3	0.357862	3.54936e-09	0.000119663	0.194	0.334	7
NKTR	0.873096	4.27104e-09	0.000143994	0.353	0.39	7
DDX24	0.342604	5.7981e-09	0.000195477	0.373	0.656	7
SCAF11	0.434967	6.03885e-09	0.000203594	0.237	0.405	7
ATF7IP	0.345073	6.63073e-09	0.000223549	0.17	0.292	7
SNX9	0.350935	7.45926e-09	0.000251481	0.169	0.286	7
TGOLN2	0.377857	7.63298e-09	0.000257338	0.201	0.344	7
DOCK8	0.403911	7.87307e-09	0.000265433	0.208	0.354	7
SFXN1	0.374187	1.04759e-08	0.000353184	0.146	0.252	7
ZC3HAV1	0.43085	1.25936e-08	0.00042458	0.285	0.487	7
PHF3	0.344767	1.62339e-08	0.00054731	0.218	0.368	7
CEP350	0.352212	1.68819e-08	0.000569156	0.149	0.255	7
CHD1	0.523243	2.48634e-08	0.000838245	0.209	0.356	7
INTS6	0.403386	2.69505e-08	0.000908608	0.149	0.253	7
MAPRE2	0.452032	3.68304e-08	0.0012417	0.177	0.298	7
CDK5RAP3	0.413098	3.88078e-08	0.00130837	0.181	0.306	7
FNBP1	0.409637	3.9722e-08	0.00133919	0.278	0.473	7
LINC00861	0.3719	4.17456e-08	0.00140741	0.16	0.268	7
CDK13	0.396988	4.39447e-08	0.00148155	0.176	0.295	7
TTC19	0.383479	6.44319e-08	0.00217226	0.165	0.277	7
PARP8	0.391819	8.71135e-08	0.00293695	0.171	0.285	7
TCIRG1	0.360624	8.85106e-08	0.00298405	0.15	0.252	7
PPP2R5C	0.457128	1.14228e-07	0.0038511	0.29	0.487	7
KDM2A	0.449714	1.16299e-07	0.00392091	0.188	0.315	7
DDX6	0.423753	1.37745e-07	0.00464392	0.257	0.433	7
TNIK	0.364618	1.45182e-07	0.00489466	0.152	0.253	7
CCDC88C	0.425425	1.48418e-07	0.00500376	0.197	0.33	7
EPC1	0.38031	1.65093e-07	0.00556594	0.306	0.522	7
CHKB	0.402699	2.24688e-07	0.00757513	0.154	0.256	7
ZRANB2	0.390848	2.5543e-07	0.00861158	0.159	0.263	7
RIPOR2	0.426428	2.60918e-07	0.00879659	0.255	0.423	7
KLRB1	0.82018	1.88514e-136	6.35555e-132	0.547	0.23	8
S100A4	0.502901	1.49278e-128	5.03278e-124	0.979	0.757	8
CTSH	0.360948	1.43341e-119	4.83261e-115	0.272	0.075	8
HOPX	0.441178	9.11185e-91	3.07197e-86	0.311	0.109	8
VIM	0.472863	2.80065e-87	9.4421e-83	0.962	0.834	8
IL7R	0.532076	1.49009e-86	5.02369e-82	0.876	0.685	8
CCR6	0.394867	8.45399e-80	2.85018e-75	0.306	0.115	8
S100A11	0.420098	7.95718e-79	2.68268e-74	0.832	0.604	8
CRIP1	0.432598	6.0386e-77	2.03585e-72	0.939	0.76	8
S100A10	0.375691	3.08325e-74	1.03949e-69	0.865	0.665	8
S100A6	0.356666	6.10844e-73	2.0594e-68	0.939	0.817	8
RPLP0	0.261894	1.98526e-71	6.6931e-67	0.995	0.957	8
ANXA1	0.413366	2.95719e-65	9.96988e-61	0.822	0.578	8
CAPG	0.385159	8.18123e-65	2.75822e-60	0.352	0.162	8
ANXA2	0.315925	2.86136e-56	9.64679e-52	0.533	0.308	8
SH3BGRL3	0.268716	3.08765e-56	1.04097e-51	0.973	0.879	8
AQP3	0.38111	1.38984e-51	4.68571e-47	0.561	0.369	8
LTB	0.328667	6.72603e-49	2.26761e-44	0.928	0.803	8
LGALS3	0.315997	8.05418e-46	2.71539e-41	0.393	0.211	8
PLP2	0.340484	1.598e-45	5.3875e-41	0.676	0.492	8
LYAR	0.407689	1.01346e-44	3.41676e-40	0.359	0.196	8
EMP3	0.304375	3.58025e-44	1.20705e-39	0.792	0.625	8
PERP	0.304926	2.6753e-42	9.0195e-38	0.252	0.118	8
RORA	0.288121	2.45385e-39	8.27292e-35	0.578	0.403	8
ALOX5AP	0.271912	2.96131e-39	9.98377e-35	0.613	0.42	8
BHLHE40	0.316752	7.04228e-38	2.37424e-33	0.385	0.223	8
GPR65	0.268471	3.53502e-36	1.1918e-31	0.318	0.175	8
AHNAK	0.286643	4.05904e-33	1.36846e-28	0.593	0.428	8
TAGLN2	0.285614	3.10582e-32	1.0471e-27	0.779	0.642	8
ERN1	0.26051	1.90917e-30	6.43658e-26	0.326	0.197	8
GPR183	0.281105	9.86326e-30	3.3253e-25	0.626	0.469	8
FLT3LG	0.258769	7.86856e-29	2.6528e-24	0.556	0.417	8
CCL4	1.89043	0	0	0.472	0.07	9
GZMK	1.65944	0	0	0.599	0.123	9
CCL5	1.64314	0	0	0.817	0.252	9
GZMA	1.58753	0	0	0.798	0.186	9
GZMH	1.40918	0	0	0.438	0.043	9
CST7	1.19041	2.15002e-269	7.24859e-265	0.734	0.267	9
NKG7	1.28773	2.05196e-255	6.91796e-251	0.451	0.096	9
HLA-DRB1	1.01816	1.23522e-179	4.16442e-175	0.605	0.228	9
CD74	0.916736	2.53226e-174	8.53727e-170	0.913	0.729	9
HLA-DPA1	0.869483	6.82424e-153	2.30072e-148	0.636	0.289	9
HLA-DPB1	0.880668	1.74676e-149	5.88903e-145	0.66	0.318	9
IFNG	0.994713	1.33811e-148	4.51132e-144	0.261	0.052	9
HLA-DRA	0.898732	6.54606e-144	2.20694e-139	0.532	0.202	9
APOBEC3G	0.876863	8.84639e-144	2.98247e-139	0.505	0.192	9
DUSP4	0.803357	1.48076e-140	4.99223e-136	0.535	0.195	9
SH3BGRL3	0.577914	1.63361e-131	5.50757e-127	0.963	0.88	9
CYTOR	0.650555	2.49124e-117	8.39895e-113	0.555	0.24	9
B2M	0.363941	2.56228e-117	8.63845e-113	0.999	0.991	9
HLA-C	0.403632	5.39664e-92	1.81942e-87	0.986	0.959	9
PFN1	0.391826	5.62049e-91	1.89489e-86	0.973	0.924	9
CXCR3	0.615175	2.02947e-90	6.84215e-86	0.446	0.19	9
HLA-DRB5	0.743988	2.15057e-88	7.25043e-84	0.337	0.123	9
COTL1	0.628923	1.97752e-84	6.66701e-80	0.781	0.61	9
C12orf75	0.608255	6.15281e-80	2.07436e-75	0.384	0.161	9
TMSB4X	0.399043	8.86781e-80	2.98969e-75	0.999	0.985	9
HLA-DQB1	0.63927	3.36716e-79	1.13521e-74	0.386	0.165	9
CRIP1	0.556671	9.86793e-79	3.32687e-74	0.898	0.764	9
CD99	0.537573	3.08431e-77	1.03984e-72	0.771	0.628	9
HLA-A	0.2889	1.12013e-75	3.77639e-71	0.991	0.967	9
CYBA	0.457646	3.2759e-74	1.10444e-69	0.888	0.803	9
RGS1	0.692324	2.10253e-69	7.08848e-65	0.691	0.446	9
PLAAT4	0.592829	1.0331e-67	3.48299e-63	0.738	0.603	9
IL32	0.282285	3.57377e-65	1.20486e-60	0.967	0.867	9
CXCR4	0.578232	8.67798e-65	2.92569e-60	0.888	0.783	9
SRGN	0.456362	2.59818e-64	8.75951e-60	0.915	0.783	9
CD2	0.467818	3.45366e-59	1.16437e-54	0.824	0.708	9
HCST	0.510269	5.86942e-58	1.97882e-53	0.779	0.668	9
CLIC1	0.43936	7.32051e-54	2.46804e-49	0.777	0.657	9
ALOX5AP	0.606599	3.12867e-52	1.0548e-47	0.596	0.423	9
HLA-B	0.253515	4.24806e-51	1.43219e-46	0.992	0.967	9
MYL12B	0.383465	1.10641e-50	3.73014e-46	0.806	0.753	9
MYL6	0.313361	3.95401e-48	1.33306e-43	0.92	0.882	9
CD52	0.462004	4.23231e-48	1.42688e-43	0.912	0.856	9
CD3D	0.355752	2.22147e-46	7.48946e-42	0.882	0.817	9
HLA-DMA	0.438444	2.93336e-44	9.88952e-40	0.286	0.133	9
LSP1	0.409003	4.93013e-43	1.66214e-38	0.746	0.662	9
PSMB9	0.459541	5.88486e-43	1.98402e-38	0.689	0.577	9
ANXA2	0.458118	1.52947e-42	5.15644e-38	0.495	0.312	9
MYO1F	0.402158	2.97068e-42	1.00153e-37	0.36	0.187	9
CFL1	0.278854	7.51415e-42	2.53332e-37	0.94	0.911	9
CKLF	0.459399	3.42485e-41	1.15465e-36	0.577	0.41	9
LGALS1	0.565744	2.52657e-40	8.51806e-36	0.458	0.281	9
ANXA5	0.507095	5.46477e-40	1.84239e-35	0.435	0.274	9
OAZ1	0.328571	8.99649e-40	3.03308e-35	0.893	0.859	9
PRF1	0.402638	5.59448e-37	1.88612e-32	0.261	0.124	9
CORO1A	0.302696	1.01576e-36	3.42453e-32	0.872	0.826	9
DUSP2	0.526736	3.0065e-35	1.01361e-30	0.69	0.567	9
CMC1	0.632926	8.41325e-35	2.83644e-30	0.266	0.138	9
ARPC2	0.30056	1.07435e-33	3.62206e-29	0.821	0.784	9
S100A6	0.302038	2.77469e-32	9.35458e-28	0.853	0.822	9
ITGB2	0.399715	1.21505e-30	4.09642e-26	0.665	0.59	9
SUB1	0.328879	2.14491e-30	7.23135e-26	0.781	0.733	9
APOBEC3C	0.429672	3.26704e-30	1.10145e-25	0.29	0.161	9
TENT5C	0.453195	5.91175e-30	1.99309e-25	0.473	0.335	9
PSME1	0.301373	6.74111e-30	2.2727e-25	0.765	0.725	9
CTSC	0.333998	2.41403e-29	8.13867e-25	0.478	0.335	9
REEP5	0.410853	9.82819e-29	3.31348e-24	0.443	0.315	9
GZMM	0.438373	1.18868e-28	4.00752e-24	0.492	0.37	9
ARPC3	0.271085	1.51858e-27	5.11973e-23	0.764	0.741	9
HMGB2	0.3643	2.67133e-27	9.00611e-23	0.539	0.418	9
S100A11	0.334124	4.7665e-27	1.60698e-22	0.705	0.613	9
SAMSN1	0.401417	5.72155e-27	1.92896e-22	0.488	0.35	9
GUK1	0.342432	1.63288e-26	5.5051e-22	0.649	0.584	9
GLIPR2	0.318386	2.79008e-25	9.40648e-21	0.269	0.152	9
LDHA	0.367702	7.00845e-25	2.36283e-20	0.739	0.701	9
S100A10	0.299001	2.02867e-24	6.83947e-20	0.736	0.673	9
LGALS3	0.411751	6.50909e-24	2.19448e-19	0.341	0.216	9
RUNX3	0.407046	7.27353e-24	2.4522e-19	0.355	0.235	9
LYAR	0.4241	5.49573e-23	1.85283e-18	0.321	0.2	9
DRAP1	0.346399	1.56842e-22	5.28776e-18	0.568	0.485	9
LCP1	0.362236	1.46868e-21	4.9515e-17	0.607	0.557	9
RABAC1	0.346853	3.19043e-21	1.07562e-16	0.522	0.43	9
S100A4	0.288348	7.34632e-21	2.47674e-16	0.835	0.766	9
PAXX	0.364826	7.60671e-21	2.56453e-16	0.508	0.426	9
LIME1	0.354275	1.07355e-20	3.61935e-16	0.632	0.574	9
ANXA1	0.279179	2.81181e-20	9.47973e-16	0.696	0.586	9
CLEC2B	0.486306	3.06378e-20	1.03292e-15	0.45	0.354	9
PSME2	0.308077	1.86164e-19	6.27632e-15	0.617	0.555	9
CD6	0.337428	3.9778e-19	1.34108e-14	0.573	0.502	9
PPP1CA	0.325539	4.97794e-19	1.67826e-14	0.582	0.521	9
PPP2R5C	0.307692	1.18551e-18	3.99684e-14	0.548	0.472	9
AHNAK	0.322137	1.19782e-18	4.03832e-14	0.538	0.432	9
PPP1R18	0.322885	1.71217e-18	5.77239e-14	0.483	0.394	9
CTSW	0.407652	9.17462e-18	3.09313e-13	0.269	0.172	9
TMEM50A	0.333246	1.11408e-17	3.75601e-13	0.525	0.459	9
VIM	0.258208	1.58072e-17	5.32923e-13	0.887	0.838	9
RNF213	0.287675	2.3002e-17	7.7549e-13	0.589	0.53	9
LY6E	0.297583	3.0773e-17	1.03748e-12	0.644	0.591	9
TUBA4A	0.482222	3.33169e-17	1.12325e-12	0.512	0.441	9
ACTN4	0.319297	4.38208e-17	1.47737e-12	0.342	0.243	9
ATP1B3	0.380725	4.91744e-17	1.65787e-12	0.334	0.232	9
PYHIN1	0.315247	6.03363e-17	2.03418e-12	0.267	0.173	9
CD81	0.470697	6.31088e-17	2.12765e-12	0.443	0.383	9
STOM	0.316983	9.99306e-17	3.36906e-12	0.289	0.194	9
RNF19A	0.335471	2.11153e-16	7.1188e-12	0.362	0.265	9
PDE4B	0.330747	4.39243e-16	1.48086e-11	0.381	0.287	9
PPIB	0.263236	5.99819e-16	2.02223e-11	0.671	0.645	9
BLOC1S1	0.342896	1.03527e-15	3.49032e-11	0.474	0.401	9
SEPTIN7	0.270131	1.79861e-15	6.06383e-11	0.619	0.582	9
WIPF1	0.294287	3.26295e-15	1.10007e-10	0.556	0.506	9
PSMA7	0.269165	3.80199e-15	1.2818e-10	0.646	0.622	9
IDH2	0.333964	5.06647e-15	1.70811e-10	0.352	0.266	9
CREM	0.437045	6.78233e-15	2.2866e-10	0.509	0.424	9
ITM2A	0.310856	1.31421e-14	4.43073e-10	0.525	0.453	9
GNG2	0.275878	2.36874e-14	7.98597e-10	0.421	0.339	9
JPT1	0.301459	3.25834e-14	1.09852e-09	0.43	0.347	9
STK17A	0.267295	4.15884e-14	1.40211e-09	0.632	0.593	9
EMB	0.292002	5.49165e-14	1.85146e-09	0.454	0.377	9
GBP5	0.263732	9.44713e-14	3.185e-09	0.341	0.248	9
CD3G	0.264121	1.22019e-13	4.11374e-09	0.636	0.609	9
CNN2	0.296206	1.73538e-13	5.85067e-09	0.585	0.538	9
SYNE1	0.282055	2.84477e-13	9.59086e-09	0.312	0.23	9
NIBAN1	0.261513	2.92123e-13	9.84862e-09	0.26	0.173	9
CLDND1	0.377664	5.50833e-13	1.85708e-08	0.364	0.292	9
MCL1	0.258351	1.37388e-12	4.63192e-08	0.665	0.613	9
CTSD	0.329025	3.38467e-12	1.14111e-07	0.421	0.362	9
CD63	0.306913	3.95458e-12	1.33325e-07	0.357	0.279	9
SLC9A3R1	0.307134	1.14378e-11	3.85615e-07	0.454	0.413	9
NFATC2	0.329519	1.22414e-11	4.12705e-07	0.336	0.268	9
UBL5	0.262521	2.04295e-11	6.88762e-07	0.651	0.648	9
ITGB1	0.314334	2.32819e-11	7.84926e-07	0.444	0.376	9
DNAJB6	0.287756	3.64131e-11	1.22763e-06	0.487	0.434	9
DYNLL1	0.282791	4.34914e-11	1.46627e-06	0.549	0.504	9
HSPB11	0.257826	6.5495e-11	2.2081e-06	0.257	0.187	9
PIP4K2A	0.297934	7.73726e-11	2.60854e-06	0.371	0.308	9
SH2D1A	0.310778	8.54431e-11	2.88063e-06	0.281	0.21	9
COPE	0.270489	3.15888e-10	1.06498e-05	0.508	0.475	9
CMC2	0.273502	4.38834e-10	1.47949e-05	0.311	0.243	9
SELENOK	0.296373	6.69077e-10	2.25573e-05	0.541	0.509	9
RASAL3	0.258161	9.82729e-10	3.31317e-05	0.42	0.373	9
MXD4	0.272085	1.21063e-09	4.08151e-05	0.265	0.202	9
LITAF	0.327478	1.261e-09	4.25133e-05	0.485	0.457	9
BHLHE40	0.274595	1.37596e-09	4.63891e-05	0.302	0.229	9
SLC7A5	0.31799	1.72342e-09	5.81035e-05	0.286	0.224	9
JMJD6	0.284691	2.17031e-09	7.31699e-05	0.253	0.191	9
ADGRE5	0.264801	2.76547e-09	9.32352e-05	0.415	0.361	9
HERPUD1	0.263323	2.96563e-09	9.99834e-05	0.462	0.412	9
FLNA	0.266034	6.0157e-09	0.000202813	0.445	0.397	9
ISG15	0.255843	8.70124e-09	0.000293354	0.415	0.352	9
IFI27L2	0.279913	1.02921e-08	0.000346988	0.276	0.216	9
CD5	0.313494	1.25803e-08	0.000424133	0.455	0.423	9
BRD2	0.287922	2.15991e-08	0.000728193	0.511	0.49	9
ARPC5L	0.279451	2.18432e-08	0.000736422	0.345	0.294	9
ZBTB38	0.27357	4.65494e-08	0.00156937	0.271	0.211	9
PRDM1	0.258737	8.46892e-08	0.00285521	0.259	0.195	9
LINC-PINT	0.27083	1.66883e-07	0.00562631	0.398	0.343	9
CXCL13	2.82312	0	0	0.478	0.011	10
PDCD1	1.13559	0	0	0.548	0.074	10
TOX2	0.925182	0	0	0.472	0.061	10
CD200	0.745298	0	0	0.299	0.018	10
TOX	0.785423	1.9977e-292	6.73505e-288	0.467	0.086	10
AC004585.1	0.584689	5.31784e-264	1.79286e-259	0.304	0.039	10
TIGIT	0.911674	1.14872e-259	3.87281e-255	0.657	0.177	10
NMB	0.909136	7.77421e-227	2.621e-222	0.279	0.039	10
AC090152.1	0.427533	1.57807e-202	5.32029e-198	0.258	0.036	10
DUSP4	1.1178	9.43706e-191	3.18161e-186	0.597	0.194	10
TNFRSF18	0.697002	5.5529e-182	1.8721e-177	0.483	0.126	10
SRGN	0.811304	1.61665e-178	5.45038e-174	0.978	0.781	10
ITM2A	0.999717	2.50615e-174	8.44924e-170	0.814	0.442	10
COTL1	0.761351	5.24836e-158	1.76943e-153	0.902	0.606	10
NR3C1	0.885464	9.31711e-153	3.14117e-148	0.776	0.424	10
FABP5	0.721646	2.11722e-145	7.13799e-141	0.415	0.118	10
GAPDH	0.608226	2.53101e-145	8.53304e-141	0.992	0.913	10
ICA1	0.648037	1.43799e-136	4.84805e-132	0.28	0.06	10
CCDC50	0.403724	7.81949e-133	2.63626e-128	0.29	0.064	10
IFNG	0.789234	1.02231e-131	3.4466e-127	0.259	0.053	10
LINC00892	0.569585	2.14163e-131	7.22028e-127	0.318	0.078	10
ZEB2	0.48037	4.85613e-131	1.6372e-126	0.265	0.056	10
TNFRSF4	0.485788	1.16392e-119	3.92403e-115	0.546	0.205	10
CD82	0.701464	4.68942e-118	1.58099e-113	0.606	0.274	10
CTLA4	0.567951	2.19726e-117	7.40785e-113	0.524	0.195	10
BTLA	0.421352	1.04893e-116	3.53635e-112	0.257	0.058	10
RNF19A	0.669151	1.10188e-116	3.71489e-112	0.574	0.256	10
NAB1	0.434479	1.72639e-111	5.82036e-107	0.288	0.074	10
HLA-A	0.455351	3.09557e-111	1.04364e-106	0.998	0.967	10
LAG3	0.815654	4.43519e-108	1.49528e-103	0.268	0.067	10
RBPJ	0.71344	8.8437e-106	2.98157e-101	0.531	0.227	10
MAF	0.54281	1.49062e-105	5.02547e-101	0.48	0.182	10
LIMS1	0.590971	3.87555e-105	1.3066e-100	0.562	0.251	10
PFN1	0.484867	6.44428e-105	2.17263e-100	0.993	0.924	10
IGFLR1	0.623183	1.88324e-104	6.34915e-100	0.589	0.275	10
CD2	0.589424	1.83183e-102	6.17583e-98	0.918	0.705	10
AHI1	0.41742	8.36617e-98	2.82057e-93	0.28	0.076	10
SLA	0.575955	1.27916e-97	4.31255e-93	0.566	0.256	10
RAB27A	0.468548	4.38475e-95	1.47827e-90	0.394	0.139	10
LYST	0.534081	1.26478e-94	4.26409e-90	0.394	0.142	10
NDFIP2	0.369852	3.10848e-91	1.04799e-86	0.299	0.089	10
ALOX5AP	0.75483	6.22244e-91	2.09783e-86	0.715	0.419	10
PTPN7	0.544835	4.74896e-89	1.60107e-84	0.616	0.317	10
CD3D	0.466407	2.42034e-85	8.15992e-81	0.965	0.814	10
SH2D1A	0.586144	8.77077e-85	2.95698e-80	0.47	0.203	10
NPDC1	0.382411	1.15536e-84	3.89517e-80	0.316	0.103	10
PKM	0.651345	4.16168e-84	1.40307e-79	0.785	0.568	10
SIRPG	0.48376	5.12069e-83	1.72639e-78	0.517	0.24	10
SYT11	0.327371	8.81732e-81	2.97267e-76	0.268	0.078	10
ZNRF1	0.438135	1.15866e-79	3.90632e-75	0.362	0.134	10
C9orf16	0.584562	8.22261e-79	2.77217e-74	0.754	0.526	10
SERF2	0.364249	1.43145e-78	4.82598e-74	0.973	0.903	10
PGAM1	0.53277	8.84083e-78	2.9806e-73	0.663	0.397	10
CORO1B	0.633581	3.20314e-75	1.07991e-70	0.686	0.418	10
FKBP5	0.61281	4.12561e-73	1.39091e-68	0.556	0.305	10
MYL6	0.393169	7.50326e-72	2.52965e-67	0.97	0.88	10
GADD45G	0.453007	4.4933e-71	1.51487e-66	0.344	0.128	10
ARPC2	0.41213	6.27404e-70	2.11523e-65	0.925	0.78	10
EPSTI1	0.428581	4.34705e-69	1.46557e-64	0.441	0.193	10
ACTB	0.386852	1.27201e-67	4.28845e-63	0.999	0.976	10
RGS2	0.567192	1.47789e-67	4.98257e-63	0.502	0.248	10
SH3BGRL3	0.428973	2.30554e-65	7.7729e-61	0.967	0.88	10
OAZ1	0.369676	4.06143e-65	1.36927e-60	0.961	0.857	10
HLA-DMA	0.369541	7.13048e-64	2.40397e-59	0.337	0.132	10
PPP1CC	0.542622	8.19288e-64	2.76215e-59	0.636	0.414	10
ARPC1B	0.440316	2.23345e-62	7.52984e-58	0.834	0.66	10
PHACTR2	0.413805	7.1964e-62	2.42619e-57	0.445	0.213	10
TPI1	0.498444	1.05487e-61	3.5564e-57	0.784	0.571	10
CD84	0.37177	2.54046e-61	8.56489e-57	0.362	0.149	10
CTSB	0.428686	1.90514e-60	6.423e-56	0.521	0.278	10
LINC01943	0.346714	3.91873e-60	1.32116e-55	0.273	0.094	10
HLA-C	0.316002	9.38606e-60	3.16442e-55	0.995	0.959	10
SNX9	0.537356	9.46637e-59	3.19149e-54	0.493	0.27	10
RHOC	0.361738	1.08644e-58	3.66284e-54	0.449	0.21	10
PARK7	0.439491	1.26889e-58	4.27792e-54	0.738	0.528	10
PHLDA1	0.466548	4.00283e-58	1.34951e-53	0.423	0.193	10
HNRNPLL	0.367383	5.54016e-58	1.86781e-53	0.452	0.217	10
STX11	0.307407	1.1081e-57	3.73583e-53	0.28	0.102	10
LAT	0.476119	2.40451e-57	8.10657e-53	0.76	0.561	10
TRPS1	0.27365	2.57285e-57	8.6741e-53	0.27	0.098	10
FKBP1A	0.440212	6.94959e-57	2.34299e-52	0.673	0.428	10
CARHSP1	0.357214	6.16521e-56	2.07854e-51	0.381	0.17	10
ARAP2	0.327033	1.30398e-55	4.39622e-51	0.402	0.183	10
VOPP1	0.384564	3.86959e-55	1.30459e-50	0.484	0.255	10
BST2	0.437137	2.30144e-54	7.75908e-50	0.587	0.346	10
HLA-DPA1	0.394759	1.58234e-53	5.33469e-49	0.542	0.294	10
CD74	0.444077	2.64503e-53	8.91746e-49	0.882	0.73	10
LSP1	0.447645	7.10856e-53	2.39658e-48	0.818	0.659	10
TRIM8	0.376147	1.02664e-52	3.46121e-48	0.358	0.161	10
CDK6	0.33242	1.03341e-52	3.48403e-48	0.304	0.124	10
ACP5	0.261489	2.30054e-52	7.75605e-48	0.339	0.144	10
PLIN2	0.557593	2.3893e-52	8.05529e-48	0.468	0.242	10
TSPAN5	0.257258	2.92536e-52	9.86255e-48	0.302	0.12	10
CTSD	0.471801	5.73485e-52	1.93345e-47	0.584	0.356	10
ITGAE	0.358024	6.70432e-52	2.2603e-47	0.311	0.129	10
CYTOR	0.33204	2.79632e-51	9.4275e-47	0.489	0.244	10
JARID2	0.308417	4.8507e-51	1.63537e-46	0.315	0.133	10
CLIC1	0.344583	9.39879e-51	3.16871e-46	0.844	0.655	10
TYMP	0.412145	2.57957e-50	8.69678e-46	0.435	0.217	10
LINC00963	0.309811	2.87065e-50	9.67812e-46	0.304	0.125	10
PTPN11	0.35643	3.12682e-50	1.05417e-45	0.304	0.131	10
RAC2	0.371225	3.7745e-50	1.27254e-45	0.883	0.737	10
AGFG1	0.359731	3.51169e-49	1.18393e-44	0.321	0.144	10
BHLHE40	0.545666	4.47653e-49	1.50922e-44	0.431	0.224	10
IL2RB	0.342436	6.09241e-49	2.05399e-44	0.456	0.231	10
MAP3K8	0.322989	7.16174e-49	2.41451e-44	0.256	0.098	10
PTTG1	0.254709	8.81521e-49	2.97196e-44	0.31	0.129	10
UCP2	0.500962	1.77079e-48	5.97005e-44	0.654	0.466	10
RGS1	0.510815	1.82016e-48	6.1365e-44	0.686	0.448	10
BATF	0.356305	3.97046e-48	1.3386e-43	0.531	0.294	10
APOBEC3C	0.311357	1.79484e-47	6.05112e-43	0.35	0.159	10
CBLB	0.399768	7.89373e-47	2.66129e-42	0.422	0.22	10
IL2RG	0.363357	8.46324e-47	2.8533e-42	0.855	0.685	10
CKLF	0.461804	8.95348e-47	3.01857e-42	0.636	0.409	10
WDR83OS	0.362775	1.52768e-46	5.15041e-42	0.666	0.455	10
ATXN1	0.252149	1.69487e-46	5.71408e-42	0.306	0.129	10
IKZF3	0.43094	1.69551e-46	5.71623e-42	0.435	0.232	10
PPM1M	0.275105	4.33424e-46	1.46125e-41	0.317	0.14	10
CD27	0.476207	4.43129e-46	1.49397e-41	0.641	0.445	10
DUSP5	0.561643	4.74526e-46	1.59982e-41	0.385	0.197	10
DYNLL1	0.362714	2.19487e-45	7.39978e-41	0.718	0.498	10
KLRB1	0.479567	2.52785e-45	8.5224e-41	0.46	0.238	10
RHOA	0.3387	2.93535e-45	9.89622e-41	0.807	0.67	10
TSHZ2	0.364634	1.59797e-44	5.38741e-40	0.432	0.223	10
SH2D2A	0.392548	1.8667e-44	6.29338e-40	0.461	0.256	10
AHR	0.277728	4.38161e-44	1.47722e-39	0.355	0.168	10
ATP1B3	0.344983	4.99783e-44	1.68497e-39	0.438	0.228	10
VDAC1	0.350427	5.21188e-44	1.75713e-39	0.514	0.306	10
BRK1	0.34965	1.01782e-43	3.43149e-39	0.71	0.509	10
GALM	0.304978	1.68805e-43	5.69108e-39	0.358	0.172	10
PTPRC	0.336419	2.63009e-43	8.86709e-39	0.91	0.792	10
PSMB9	0.349915	4.50725e-43	1.51957e-38	0.776	0.574	10
APOBEC3G	0.380373	7.5741e-43	2.55353e-38	0.39	0.198	10
ATP5MC3	0.331926	1.06574e-42	3.59304e-38	0.71	0.521	10
GNG5	0.358781	1.08248e-42	3.64949e-38	0.624	0.412	10
IFI16	0.330966	1.23597e-42	4.16694e-38	0.552	0.329	10
ICOS	0.385925	1.36606e-42	4.60553e-38	0.563	0.344	10
CFL1	0.278515	2.0843e-42	7.02702e-38	0.973	0.909	10
C17orf49	0.359132	4.22215e-42	1.42346e-37	0.557	0.342	10
NFATC1	0.365501	1.20845e-41	4.07418e-37	0.351	0.174	10
PSTPIP1	0.321367	1.40005e-41	4.72011e-37	0.462	0.256	10
MXD4	0.327173	1.53677e-41	5.18108e-37	0.382	0.197	10
SPOCK2	0.404526	1.644e-41	5.54258e-37	0.774	0.618	10
CAPZB	0.32051	3.93551e-41	1.32682e-36	0.773	0.61	10
ARID5B	0.372855	4.94333e-41	1.66659e-36	0.62	0.402	10
YWHAQ	0.329108	1.25573e-40	4.23357e-36	0.656	0.45	10
PDIA6	0.330736	3.8202e-40	1.28794e-35	0.515	0.309	10
MTHFD2	0.301512	5.8465e-40	1.97109e-35	0.359	0.181	10
HLA-DRB1	0.366221	8.19491e-40	2.76283e-35	0.439	0.236	10
MIS18BP1	0.270613	1.1238e-39	3.78879e-35	0.314	0.145	10
RILPL2	0.386034	2.02722e-39	6.83458e-35	0.449	0.255	10
ANXA5	0.351608	3.14171e-39	1.05919e-34	0.472	0.273	10
COX8A	0.307988	3.21394e-39	1.08355e-34	0.754	0.569	10
SIAH2	0.354006	5.27851e-39	1.7796e-34	0.449	0.253	10
ACTG1	0.355271	9.83998e-39	3.31745e-34	0.955	0.899	10
ELOB	0.287725	2.69654e-38	9.09111e-34	0.796	0.632	10
SH3KBP1	0.336464	3.49446e-38	1.17812e-33	0.595	0.407	10
FYN	0.316694	4.57483e-38	1.54236e-33	0.719	0.536	10
DNPH1	0.35006	5.85523e-38	1.97403e-33	0.481	0.287	10
TBC1D4	0.256327	6.08073e-38	2.05006e-33	0.339	0.166	10
C4orf48	0.298244	8.06333e-38	2.71847e-33	0.435	0.245	10
LIMA1	0.279031	8.11565e-38	2.73611e-33	0.263	0.117	10
RNASEK	0.309479	9.8128e-38	3.30829e-33	0.82	0.661	10
SFXN1	0.345462	1.57073e-37	5.29554e-33	0.423	0.239	10
SEM1	0.326079	1.64431e-37	5.54364e-33	0.618	0.427	10
NDUFA13	0.280388	1.76819e-37	5.96128e-33	0.784	0.618	10
TPM3	0.319901	2.35748e-37	7.94802e-33	0.791	0.639	10
SUMO2	0.26409	3.94663e-37	1.33057e-32	0.89	0.754	10
DBI	0.353727	4.61756e-37	1.55677e-32	0.612	0.412	10
ELMO1	0.279476	4.93036e-37	1.66222e-32	0.41	0.225	10
ARPC4	0.305017	6.02105e-37	2.02994e-32	0.627	0.43	10
TMSB4X	0.29748	6.1715e-37	2.08066e-32	0.999	0.986	10
AKAP13	0.328442	8.2987e-37	2.79782e-32	0.65	0.455	10
POMP	0.297191	8.99889e-37	3.03389e-32	0.613	0.406	10
CFLAR	0.341562	1.07031e-36	3.60844e-32	0.579	0.38	10
MAPKAPK3	0.250456	1.20481e-36	4.06188e-32	0.305	0.145	10
PPP1CA	0.307566	1.50671e-36	5.07973e-32	0.701	0.516	10
PPM1G	0.307799	1.64855e-36	5.55792e-32	0.539	0.342	10
RAP1A	0.33292	5.21448e-36	1.75801e-31	0.641	0.45	10
ACTN4	0.304165	8.17588e-36	2.75642e-31	0.428	0.24	10
COPZ1	0.259993	1.49061e-35	5.02544e-31	0.419	0.232	10
MSN	0.332073	1.78538e-35	6.01923e-31	0.66	0.48	10
TMEM167A	0.265019	1.92257e-35	6.48175e-31	0.358	0.186	10
RABGAP1L	0.287579	3.89165e-35	1.31203e-30	0.481	0.286	10
PSME2	0.3315	4.29679e-35	1.44862e-30	0.715	0.552	10
ECHS1	0.263242	4.94185e-35	1.6661e-30	0.355	0.184	10
SOD1	0.379061	5.78533e-35	1.95047e-30	0.84	0.723	10
GLCCI1	0.302221	9.4696e-35	3.19258e-30	0.391	0.217	10
YWHAB	0.274949	1.55049e-34	5.22731e-30	0.848	0.707	10
SEC11A	0.295806	2.03082e-34	6.84672e-30	0.56	0.357	10
PSMB3	0.278614	2.10852e-34	7.10865e-30	0.621	0.426	10
PSMD8	0.274794	4.6544e-34	1.56918e-29	0.589	0.394	10
RAB11FIP1	0.29065	8.0614e-34	2.71782e-29	0.331	0.169	10
TRBC2	0.475055	1.24503e-33	4.19749e-29	0.83	0.665	10
ITGAL	0.283635	1.69292e-33	5.7075e-29	0.422	0.244	10
BLOC1S1	0.277634	2.11142e-33	7.11842e-29	0.595	0.396	10
ARF5	0.295466	2.69789e-33	9.09567e-29	0.556	0.371	10
TMBIM4	0.265749	5.83364e-33	1.96675e-28	0.612	0.403	10
NDUFV2	0.301495	6.34218e-33	2.1382e-28	0.609	0.43	10
LCK	0.303186	9.58678e-33	3.23209e-28	0.799	0.662	10
ARPC3	0.269352	2.18445e-32	7.36466e-28	0.858	0.737	10
NFATC2	0.314516	2.3801e-32	8.02426e-28	0.438	0.264	10
PTPN22	0.270222	2.69838e-32	9.09731e-28	0.343	0.181	10
UQCR11	0.255068	3.54873e-32	1.19642e-27	0.815	0.675	10
ITGB2	0.313256	4.29683e-32	1.44863e-27	0.749	0.586	10
CNIH1	0.322812	7.04957e-32	2.37669e-27	0.466	0.295	10
TRAPPC1	0.285322	7.91472e-32	2.66837e-27	0.636	0.447	10
SPCS1	0.298449	1.34168e-31	4.52335e-27	0.737	0.571	10
PRDX1	0.308215	1.35439e-31	4.5662e-27	0.651	0.477	10
CALM3	0.319499	2.25261e-31	7.59444e-27	0.661	0.502	10
UBC	0.267164	2.38427e-31	8.03834e-27	0.96	0.909	10
SEPTIN7	0.284617	3.40195e-31	1.14693e-26	0.743	0.577	10
HMGN1	0.277533	5.30276e-31	1.78777e-26	0.815	0.66	10
WDR1	0.302308	2.68088e-30	9.03832e-26	0.606	0.437	10
MRPS6	0.288024	2.89304e-30	9.7536e-26	0.443	0.268	10
TRAC	0.490599	3.60904e-30	1.21675e-25	0.815	0.634	10
WNK1	0.301597	4.03634e-30	1.36081e-25	0.52	0.348	10
PSMB8	0.267597	4.27113e-30	1.43997e-25	0.655	0.492	10
SAMSN1	0.326154	5.01159e-30	1.68961e-25	0.543	0.348	10
IQGAP1	0.320677	5.22753e-30	1.76241e-25	0.555	0.386	10
CDK2AP2	0.286205	6.95608e-30	2.34517e-25	0.438	0.264	10
PDE4D	0.303221	1.03429e-29	3.48702e-25	0.37	0.21	10
HNRNPA3	0.279503	1.7112e-29	5.76915e-25	0.692	0.553	10
TNFRSF1B	0.254525	2.3601e-29	7.95683e-25	0.466	0.284	10
TSPO	0.290685	3.59435e-29	1.2118e-24	0.665	0.481	10
PRKCH	0.279722	5.38424e-29	1.81524e-24	0.565	0.397	10
CD247	0.305077	6.69156e-29	2.25599e-24	0.648	0.483	10
TNFSF8	0.325662	9.553e-29	3.2207e-24	0.281	0.146	10
PSMA5	0.256768	1.4847e-28	5.00551e-24	0.505	0.334	10
ERH	0.268221	2.53266e-28	8.53861e-24	0.606	0.434	10
UBE2I	0.264591	2.76706e-28	9.32885e-24	0.614	0.439	10
KPNA2	0.278303	3.62688e-28	1.22276e-23	0.294	0.154	10
HLA-DRA	0.295071	3.71599e-28	1.25281e-23	0.376	0.21	10
NDUFC2	0.274831	4.28558e-28	1.44484e-23	0.556	0.381	10
WIPF1	0.278871	6.8549e-28	2.31106e-23	0.656	0.502	10
PPP4R2	0.254873	1.06849e-27	3.6023e-23	0.421	0.26	10
TLK1	0.271055	1.56932e-27	5.2908e-23	0.466	0.299	10
TAP1	0.277548	2.31664e-27	7.81032e-23	0.555	0.381	10
UBE2L6	0.274191	2.49262e-27	8.40362e-23	0.514	0.34	10
HLA-DPB1	0.269953	3.24528e-27	1.09411e-22	0.511	0.325	10
EID1	0.251809	3.46079e-27	1.16677e-22	0.692	0.526	10
PFKFB3	0.256648	4.27233e-27	1.44037e-22	0.323	0.176	10
CSK	0.257237	1.10532e-26	3.72647e-22	0.583	0.419	10
H2AFZ	0.339768	1.53732e-26	5.18291e-22	0.732	0.598	10
CD4	0.282409	4.80064e-26	1.61849e-21	0.501	0.335	10
ISCU	0.291355	7.74878e-26	2.61242e-21	0.667	0.509	10
HLA-DRB5	0.291094	1.02719e-25	3.46308e-21	0.253	0.127	10
ACTR3	0.278252	1.56721e-25	5.2837e-21	0.685	0.544	10
CD6	0.272934	2.54239e-25	8.57142e-21	0.657	0.499	10
ID2	0.397693	3.09907e-25	1.04482e-20	0.534	0.381	10
SELENOT	0.281027	3.59674e-25	1.21261e-20	0.559	0.392	10
TANK	0.268796	7.67456e-25	2.5874e-20	0.414	0.255	10
ZFP36L1	0.417254	8.16742e-25	2.75356e-20	0.717	0.597	10
ISG15	0.307011	9.36732e-25	3.1581e-20	0.527	0.348	10
ATP5F1C	0.252064	1.9338e-24	6.51961e-20	0.549	0.394	10
ATP5IF1	0.25415	2.20948e-24	7.44904e-20	0.672	0.51	10
ZNF331	0.327288	3.28035e-24	1.10594e-19	0.524	0.366	10
CD7	0.486032	9.4712e-24	3.19312e-19	0.697	0.608	10
NDUFB2	0.292273	1.44218e-23	4.86217e-19	0.634	0.485	10
TGIF1	0.276556	2.54045e-23	8.56487e-19	0.309	0.175	10
ARID5A	0.25735	3.04744e-23	1.02741e-18	0.568	0.399	10
LBH	0.35694	3.25362e-23	1.09693e-18	0.602	0.463	10
VCP	0.251335	4.4722e-23	1.50776e-18	0.585	0.434	10
CALR	0.314066	7.85804e-23	2.64926e-18	0.696	0.575	10
DUSP2	0.335762	1.14213e-22	3.85058e-18	0.708	0.567	10
PMAIP1	0.327118	1.15801e-22	3.90413e-18	0.394	0.245	10
GNAI2	0.294037	1.49578e-22	5.04288e-18	0.627	0.508	10
UQCRC2	0.266636	1.76283e-22	5.94321e-18	0.464	0.314	10
SPTAN1	0.252259	3.46349e-22	1.16768e-17	0.51	0.362	10
SPCS2	0.280943	6.30666e-22	2.12623e-17	0.566	0.408	10
GYPC	0.265542	1.27385e-21	4.29466e-17	0.684	0.529	10
HIF1A	0.294976	1.37584e-21	4.63849e-17	0.445	0.304	10
CD40LG	0.336983	1.42686e-21	4.81053e-17	0.367	0.23	10
FAM118A	0.270803	5.00355e-21	1.6869e-16	0.331	0.2	10
PDCL3	0.251148	6.10646e-21	2.05873e-16	0.35	0.214	10
ENO1	0.269673	6.14923e-21	2.07315e-16	0.729	0.601	10
CD81	0.286008	6.19849e-21	2.08976e-16	0.511	0.38	10
LCP2	0.294826	1.81006e-20	6.10245e-16	0.601	0.469	10
CST7	0.310377	2.4945e-20	8.40995e-16	0.434	0.281	10
REL	0.276803	2.62567e-20	8.85219e-16	0.473	0.331	10
ALDOA	0.256205	7.8013e-20	2.63013e-15	0.534	0.399	10
CREM	0.311919	1.38824e-19	4.68032e-15	0.568	0.422	10
SLC7A5	0.258479	7.3437e-19	2.47585e-14	0.347	0.222	10
SESN3	0.31904	1.53525e-18	5.17593e-14	0.334	0.216	10
LY6E	0.327334	1.67924e-18	5.66138e-14	0.708	0.588	10
FAM107B	0.26974	5.59445e-17	1.88611e-12	0.583	0.461	10
FYB1	0.259113	6.18973e-17	2.08681e-12	0.829	0.73	10
PRDM1	0.277316	9.99206e-14	3.36872e-09	0.292	0.194	10
TRBC1	0.53637	4.30872e-13	1.45264e-08	0.571	0.46	10
IFI6	0.2657	5.27166e-12	1.77729e-07	0.398	0.294	10
PASK	0.291116	8.95509e-11	3.01912e-06	0.263	0.18	10
NKG7	2.83774	0	0	0.85	0.089	11
GNLY	2.79205	0	0	0.642	0.034	11
GZMH	2.20926	0	0	0.719	0.041	11
CCL4	1.95181	0	0	0.629	0.071	11
FGFBP2	1.93793	0	0	0.514	0.004	11
CCL5	1.81039	0	0	0.978	0.255	11
GZMB	1.59545	0	0	0.524	0.031	11
GZMA	1.33584	0	0	0.834	0.193	11
PLEK	0.916817	0	0	0.339	0.032	11
PRF1	1.40247	1.68553e-297	5.6826e-293	0.587	0.116	11
ZEB2	0.91088	3.37975e-250	1.13945e-245	0.388	0.054	11
CST7	1.29317	1.08186e-244	3.6474e-240	0.802	0.272	11
HOPX	1.05208	2.75949e-241	9.30336e-237	0.539	0.108	11
KLRG1	0.808493	3.42214e-174	1.15374e-169	0.408	0.083	11
MATK	0.654417	5.0523e-159	1.70333e-154	0.323	0.057	11
C12orf75	0.886648	2.81935e-144	9.50516e-140	0.527	0.16	11
CTSW	1.02515	2.62819e-143	8.86067e-139	0.526	0.166	11
TBX21	0.582275	1.87896e-126	6.33474e-122	0.291	0.057	11
SPON2	0.72324	2.79912e-126	9.43695e-122	0.256	0.045	11
B2M	0.395173	1.6601e-104	5.59685e-100	1	0.991	11
SH3BGRL3	0.642297	1.77227e-104	5.97503e-100	0.973	0.881	11
IFNG	0.632767	2.71536e-101	9.15457e-97	0.266	0.055	11
MYO1F	0.695928	1.16473e-100	3.92677e-96	0.507	0.185	11
S100A4	0.592045	1.04356e-91	3.51827e-87	0.957	0.764	11
LYAR	0.698267	2.84656e-86	9.5969e-82	0.501	0.196	11
SAMD3	0.551953	2.28867e-79	7.71603e-75	0.349	0.11	11
TGFBR3	0.547167	5.49383e-76	1.85219e-71	0.256	0.067	11
CD52	0.600313	1.3746e-75	4.63432e-71	0.95	0.855	11
LGALS1	0.706417	3.38776e-70	1.14215e-65	0.584	0.28	11
HLA-C	0.388334	1.12879e-63	3.80559e-59	0.993	0.959	11
HLA-DPB1	0.562892	1.19221e-59	4.01943e-55	0.606	0.325	11
HCST	0.572702	5.26821e-59	1.77612e-54	0.83	0.668	11
ID2	0.691614	4.06578e-57	1.37074e-52	0.636	0.38	11
CYBA	0.45339	2.01628e-53	6.79769e-49	0.894	0.804	11
S100A6	0.396177	6.18897e-51	2.08655e-46	0.913	0.821	11
HLA-DRB1	0.586646	4.45109e-48	1.50064e-43	0.483	0.237	11
GZMM	0.580558	1.0284e-47	3.46716e-43	0.582	0.369	11
APOBEC3G	0.562042	3.27267e-47	1.10335e-42	0.416	0.199	11
CHST12	0.472606	3.47522e-45	1.17164e-40	0.346	0.15	11
CD99	0.49246	1.03205e-44	3.47945e-40	0.759	0.63	11
PFN1	0.328297	1.83987e-42	6.20293e-38	0.977	0.925	11
LITAF	0.57438	2.59256e-42	8.74056e-38	0.624	0.453	11
S100A10	0.474527	1.53919e-41	5.18923e-37	0.805	0.672	11
RAP1B	0.563254	4.05343e-41	1.36657e-36	0.654	0.519	11
TMSB4X	0.287883	1.13942e-40	3.84144e-36	0.998	0.986	11
EFHD2	0.697369	1.35486e-40	4.56777e-36	0.466	0.285	11
HLA-DPA1	0.520788	2.13151e-40	7.18616e-36	0.521	0.297	11
CRIP1	0.396896	6.35643e-38	2.14301e-33	0.895	0.766	11
ABI3	0.419858	1.49225e-37	5.03097e-33	0.253	0.1	11
BHLHE40	0.597729	1.04485e-36	3.52261e-32	0.421	0.226	11
ITGB1	0.536794	1.10988e-33	3.74186e-29	0.549	0.373	11
MYL12A	0.367792	7.0783e-33	2.38638e-28	0.894	0.845	11
ARPC2	0.357604	1.11868e-32	3.77151e-28	0.862	0.784	11
IFITM2	0.442758	2.40222e-29	8.09883e-25	0.794	0.704	11
FTL	0.265752	5.95436e-28	2.00745e-23	0.975	0.953	11
CFL1	0.276975	6.49466e-28	2.18961e-23	0.947	0.911	11
EMP3	0.371146	2.11713e-27	7.13769e-23	0.75	0.631	11
ITGB2	0.472451	7.54639e-27	2.54419e-22	0.671	0.591	11
CLIC1	0.352902	1.46617e-26	4.94304e-22	0.764	0.659	11
CTSC	0.375273	4.26097e-26	1.43654e-21	0.499	0.337	11
YWHAQ	0.406793	5.79952e-25	1.95525e-20	0.577	0.454	11
PYHIN1	0.388913	2.66592e-24	8.98788e-20	0.316	0.173	11
FLNA	0.580846	2.82981e-24	9.54041e-20	0.521	0.395	11
KLRB1	0.663182	2.91713e-24	9.83482e-20	0.403	0.242	11
PLAAT4	0.374569	4.83185e-24	1.62901e-19	0.707	0.606	11
ANXA2	0.35381	1.30047e-23	4.38442e-19	0.484	0.315	11
GZMK	0.350478	2.89977e-23	9.77627e-19	0.288	0.139	11
RUNX3	0.441865	2.21202e-22	7.4576e-18	0.386	0.236	11
GPR65	0.388436	4.85609e-22	1.63718e-17	0.318	0.178	11
PSMB9	0.329366	5.50117e-21	1.85466e-16	0.681	0.579	11
GSTP1	0.34183	3.79659e-20	1.27998e-15	0.531	0.399	11
RASSF1	0.334226	5.40394e-20	1.82189e-15	0.29	0.165	11
CD63	0.4021	6.24225e-20	2.10451e-15	0.418	0.278	11
APMAP	0.349472	2.03007e-19	6.84419e-15	0.301	0.176	11
DSTN	0.371321	1.53841e-18	5.18659e-14	0.398	0.274	11
GLIPR2	0.328366	2.22406e-18	7.4982e-14	0.275	0.154	11
TNF	0.630086	2.35106e-18	7.92635e-14	0.263	0.144	11
SPN	0.432967	3.07037e-18	1.03514e-13	0.413	0.293	11
TPST2	0.335535	7.9028e-18	2.66435e-13	0.263	0.147	11
RORA	0.3097	2.87621e-17	9.69684e-13	0.539	0.409	11
MYO1G	0.387402	3.84586e-17	1.29659e-12	0.366	0.247	11
RAB29	0.3229	2.2226e-16	7.49329e-12	0.256	0.148	11
CXCR4	0.286429	2.29846e-16	7.74904e-12	0.857	0.785	11
PCED1B-AS1	0.297713	3.95303e-16	1.33272e-11	0.71	0.624	11
PAXX	0.345608	4.09483e-16	1.38053e-11	0.519	0.427	11
BIN2	0.325446	7.12964e-16	2.40369e-11	0.504	0.406	11
LSP1	0.273496	8.90758e-16	3.0031e-11	0.72	0.664	11
DUSP2	0.301813	1.69184e-15	5.70388e-11	0.679	0.569	11
ADAM8	0.308591	2.30386e-15	7.76724e-11	0.255	0.149	11
AHNAK	0.406238	6.50277e-15	2.19234e-10	0.537	0.434	11
PTPN4	0.296685	9.15127e-15	3.08526e-10	0.304	0.194	11
SEPTIN7	0.291921	1.4744e-14	4.97078e-10	0.644	0.582	11
CDC42EP3	0.312818	5.58499e-14	1.88292e-09	0.331	0.223	11
RABAC1	0.303456	7.42217e-14	2.50231e-09	0.522	0.431	11
CD53	0.256148	1.20799e-13	4.07262e-09	0.636	0.561	11
HLA-DRA	0.33973	1.72251e-13	5.80726e-09	0.329	0.213	11
DNAJC1	0.274678	2.45323e-13	8.27082e-09	0.319	0.214	11
MYL12B	0.276253	3.39726e-13	1.14535e-08	0.765	0.755	11
DHRS7	0.271315	4.58812e-13	1.54684e-08	0.453	0.363	11
VAMP2	0.262945	6.84834e-13	2.30885e-08	0.677	0.619	11
PPP2R5C	0.313099	7.06595e-13	2.38222e-08	0.562	0.473	11
ARPC5L	0.343934	1.01321e-12	3.41595e-08	0.391	0.294	11
GNG2	0.32243	1.02083e-12	3.44164e-08	0.439	0.34	11
PPP1CA	0.287956	1.73038e-12	5.8338e-08	0.591	0.522	11
RPL27A	0.262546	3.54304e-12	1.1945e-07	0.938	0.911	11
MSN	0.298712	8.13991e-11	2.74429e-06	0.539	0.486	11
KLF3	0.306758	1.30475e-10	4.39885e-06	0.366	0.279	11
ACTN4	0.26021	2.89683e-10	9.76638e-06	0.339	0.245	11
DBI	0.275678	4.24352e-10	1.43066e-05	0.484	0.418	11
SLC9A3R1	0.37945	5.63623e-10	1.9002e-05	0.459	0.414	11
FKBP11	0.275251	6.33906e-10	2.13715e-05	0.316	0.229	11
SPCS2	0.265772	6.7717e-10	2.28301e-05	0.484	0.412	11
TGFB1	0.368481	1.00194e-09	3.37794e-05	0.534	0.496	11
UPP1	0.254045	1.03326e-09	3.48354e-05	0.281	0.196	11
ITGB7	0.282929	2.72992e-09	9.20365e-05	0.328	0.249	11
SYNE1	0.329074	2.98054e-09	0.000100486	0.308	0.232	11
CLEC2B	0.276069	4.57436e-09	0.00015422	0.439	0.356	11
CSTB	0.254595	1.08539e-08	0.000365927	0.537	0.483	11
ARL5A	0.272077	1.96433e-08	0.000662256	0.326	0.255	11
JMJD6	0.314775	5.23414e-08	0.00176464	0.263	0.191	11
SUPT4H1	0.258389	7.70282e-08	0.00259693	0.348	0.279	11
S1PR4	0.261392	7.81639e-08	0.00263522	0.359	0.29	11
DNAJB6	0.293304	2.43698e-07	0.00821603	0.486	0.435	11
LCP1	0.273232	2.55469e-07	0.00861288	0.574	0.558	11
CD8B	1.58301	0	0	0.803	0.026	12
CD8A	1.40221	0	0	0.744	0.03	12
KLRK1	1.1371	0	0	0.613	0.019	12
LINC02446	1.02068	0	0	0.367	0.004	12
RPL13	0.270378	4.2583e-62	1.43564e-57	1	0.986	12
RPS18	0.27655	5.99265e-59	2.02036e-54	1	0.981	12
RPS2	0.267011	4.24686e-58	1.43179e-53	1	0.978	12
RPL26	0.252133	7.39497e-56	2.49314e-51	1	0.973	12
RPS6	0.341578	3.04787e-55	1.02756e-50	0.998	0.975	12
RPL3	0.298798	1.0709e-54	3.61044e-50	1	0.973	12
RPL23A	0.381344	4.60262e-53	1.55173e-48	0.998	0.966	12
RPL10A	0.301429	3.74584e-52	1.26287e-47	0.997	0.956	12
RPLP2	0.358643	4.72813e-52	1.59404e-47	1	0.974	12
CTSW	0.415135	3.69451e-50	1.24557e-45	0.404	0.17	12
RPSA	0.291282	3.09691e-48	1.04409e-43	0.998	0.947	12
RPS12	0.25769	1.37869e-47	4.64812e-43	1	0.981	12
RPL17	0.284241	2.67394e-45	9.01491e-41	1	0.967	12
RPL21	0.394347	3.67666e-44	1.23955e-39	1	0.969	12
RPL34	0.287972	9.03739e-44	3.04686e-39	0.998	0.976	12
RPS5	0.250289	1.60374e-43	5.40683e-39	0.997	0.953	12
RPL13A	0.412742	7.91708e-42	2.66916e-37	0.99	0.952	12
PTGER2	0.34239	1.01936e-41	3.43667e-37	0.287	0.107	12
RPL36A	0.319857	5.07453e-39	1.71083e-34	0.988	0.934	12
RPS20	0.461149	9.31082e-38	3.13905e-33	0.971	0.868	12
RPS16	0.26328	5.1802e-37	1.74645e-32	0.998	0.964	12
RPL9	0.26084	9.80266e-35	3.30487e-30	0.997	0.964	12
RPS29	0.388032	1.07034e-33	3.60855e-29	0.995	0.949	12
RPL27	0.270937	2.14581e-32	7.23437e-28	0.993	0.933	12
RPS17	0.436503	2.43583e-32	8.21215e-28	0.958	0.855	12
GAS5	0.266904	7.77521e-32	2.62133e-27	0.922	0.766	12
RPL31	0.407512	8.7603e-32	2.95345e-27	0.99	0.928	12
RPL7	0.354349	9.36227e-31	3.1564e-26	0.992	0.929	12
EEF1G	0.293587	1.0133e-30	3.41623e-26	0.995	0.928	12
RPL27A	0.415788	1.90244e-27	6.41388e-23	0.969	0.91	12
RPS10	0.414188	1.29524e-26	4.36678e-22	0.854	0.686	12
RPL38	0.25186	2.39017e-24	8.05823e-20	0.981	0.912	12
NOSIP	0.350794	2.59518e-24	8.74938e-20	0.659	0.484	12
SNHG32	0.347153	5.92722e-23	1.9983e-18	0.61	0.424	12
NOP53	0.267859	1.89014e-22	6.37243e-18	0.932	0.821	12
SELL	0.263786	2.39494e-21	8.07429e-17	0.652	0.449	12
EIF3E	0.256103	8.17222e-18	2.75518e-13	0.876	0.746	12
SNHG5	0.340178	1.39567e-17	4.70537e-13	0.769	0.645	12
ZFP36L2	0.261341	7.22069e-11	2.43438e-06	0.92	0.84	12
IFIT3	1.50253	0	0	0.607	0.042	13
IFIT1	1.40433	0	0	0.604	0.029	13
IFI44L	1.33463	0	0	0.761	0.13	13
RSAD2	1.1588	0	0	0.535	0.03	13
CMPK2	0.871063	0	0	0.493	0.041	13
OAS1	1.16394	1.99276e-285	6.71838e-281	0.632	0.095	13
MX1	1.64545	5.02942e-268	1.69562e-263	0.848	0.217	13
USP18	0.73935	1.21358e-238	4.09148e-234	0.391	0.041	13
OAS3	0.862628	3.36344e-207	1.13395e-202	0.475	0.071	13
IFIT2	0.914425	1.95248e-202	6.58258e-198	0.301	0.029	13
IFI6	1.61492	2.76376e-201	9.31775e-197	0.846	0.287	13
ISG15	1.84712	4.93616e-201	1.66418e-196	0.903	0.344	13
IFI44	0.868423	1.12791e-169	3.80264e-165	0.55	0.111	13
XAF1	1.05285	3.50954e-158	1.1832e-153	0.701	0.21	13
PLSCR1	0.905722	7.70052e-158	2.59615e-153	0.498	0.099	13
SAMD9L	0.915575	1.59385e-150	5.3735e-146	0.547	0.124	13
EPSTI1	1.04704	4.13746e-145	1.3949e-140	0.672	0.194	13
HERC5	0.879068	1.99603e-140	6.72942e-136	0.48	0.103	13
EIF2AK2	0.954504	6.55e-137	2.20827e-132	0.632	0.182	13
MX2	0.943099	3.24714e-136	1.09474e-131	0.607	0.172	13
LY6E	1.08954	1.35746e-130	4.57653e-126	0.923	0.587	13
STAT1	1.04196	2.05791e-122	6.93803e-118	0.808	0.344	13
IRF7	0.943558	1.8781e-116	6.33184e-112	0.654	0.23	13
OASL	0.917452	2.15744e-112	7.27358e-108	0.445	0.103	13
OAS2	0.751066	6.98864e-109	2.35615e-104	0.473	0.123	13
HELZ2	0.594932	4.1011e-105	1.38265e-100	0.368	0.077	13
DDX60	0.591484	6.55749e-92	2.21079e-87	0.361	0.081	13
IFI35	0.788906	1.04226e-91	3.51388e-87	0.502	0.156	13
PARP9	0.64282	1.79843e-90	6.06324e-86	0.47	0.134	13
ISG20	1.0637	1.38272e-88	4.66169e-84	0.871	0.553	13
LGALS9	0.683375	1.17837e-85	3.97277e-81	0.47	0.142	13
BST2	0.859898	1.1125e-83	3.7507e-79	0.721	0.348	13
GBP1	0.811653	5.65936e-81	1.908e-76	0.512	0.174	13
IFIT5	0.480749	1.71604e-79	5.78545e-75	0.294	0.062	13
MT2A	0.905461	1.04743e-70	3.53131e-66	0.709	0.365	13
SAMD9	0.629722	1.22537e-70	4.1312e-66	0.49	0.168	13
TRIM22	0.839259	1.08819e-68	3.66871e-64	0.664	0.341	13
HSH2D	0.491479	2.88985e-67	9.74283e-63	0.356	0.099	13
IFI16	0.75809	1.25636e-66	4.23571e-62	0.669	0.332	13
ZBP1	0.554234	1.30591e-59	4.40273e-55	0.323	0.09	13
IFIH1	0.418911	7.55966e-59	2.54866e-54	0.281	0.071	13
UBE2L6	0.720914	2.22512e-58	7.50178e-54	0.649	0.341	13
DDX60L	0.459599	2.33673e-57	7.87806e-53	0.328	0.095	13
SP100	0.645174	5.34453e-56	1.80185e-51	0.746	0.457	13
SP110	0.62086	4.88818e-55	1.648e-50	0.684	0.377	13
SHFL	0.634629	1.15084e-54	3.87995e-50	0.597	0.291	13
HERC6	0.370089	2.27787e-53	7.67961e-49	0.269	0.07	13
TNFSF10	0.706502	6.23306e-53	2.10141e-48	0.46	0.186	13
IFITM1	0.901525	4.94788e-49	1.66813e-44	0.861	0.64	13
PARP14	0.452727	4.40588e-47	1.4854e-42	0.393	0.144	13
DTX3L	0.39547	2.05023e-46	6.91216e-42	0.308	0.098	13
ADAR	0.581371	2.91567e-45	9.82988e-41	0.684	0.411	13
PARP10	0.576209	1.04435e-44	3.52091e-40	0.473	0.214	13
DDX58	0.434216	6.41885e-44	2.16405e-39	0.286	0.09	13
DRAP1	0.628052	1.24613e-43	4.2012e-39	0.741	0.483	13
PNPT1	0.408319	7.85099e-43	2.64688e-38	0.276	0.086	13
PPM1K	0.533608	4.23769e-41	1.4287e-36	0.512	0.249	13
PSMB9	0.557705	8.63163e-41	2.91007e-36	0.833	0.577	13
PHF11	0.501922	1.31905e-39	4.44704e-35	0.512	0.254	13
RNF213	0.488709	1.09241e-37	3.68295e-33	0.779	0.528	13
STAT2	0.416662	4.58424e-37	1.54553e-32	0.308	0.114	13
LAP3	0.491621	8.7465e-37	2.94879e-32	0.383	0.162	13
IRF9	0.464906	3.3696e-36	1.13603e-31	0.614	0.341	13
NT5C3A	0.546581	8.31281e-35	2.80258e-30	0.438	0.212	13
CHMP5	0.418543	2.46612e-34	8.31427e-30	0.453	0.217	13
GIMAP7	0.531015	2.59497e-34	8.74868e-30	0.784	0.545	13
MYL12A	0.41772	3.07587e-34	1.037e-29	0.945	0.845	13
NMI	0.477176	6.31634e-34	2.12949e-29	0.351	0.147	13
GIMAP4	0.475483	1.56906e-33	5.28993e-29	0.714	0.463	13
SPATS2L	0.423472	2.33934e-33	7.88686e-29	0.299	0.11	13
GBP4	0.488394	4.29233e-33	1.44712e-28	0.383	0.17	13
CHST12	0.469522	8.81085e-32	2.97049e-27	0.356	0.151	13
IFITM2	0.438813	2.46389e-31	8.30674e-27	0.878	0.704	13
TRANK1	0.35008	1.90533e-30	6.42362e-26	0.323	0.134	13
PSME1	0.335968	1.35265e-27	4.56032e-23	0.891	0.724	13
HLA-C	0.269741	5.6177e-27	1.89395e-22	0.99	0.959	13
APOL6	0.390438	8.75078e-27	2.95024e-22	0.4	0.199	13
TYMP	0.435949	3.97194e-26	1.3391e-21	0.435	0.221	13
TAP1	0.438826	6.65349e-26	2.24316e-21	0.597	0.383	13
GIMAP5	0.409601	5.92809e-25	1.9986e-20	0.619	0.402	13
PSME2	0.371416	1.9052e-24	6.42319e-20	0.754	0.554	13
NUB1	0.406483	1.70426e-23	5.74573e-19	0.396	0.207	13
PARP12	0.318702	4.55888e-23	1.53698e-18	0.284	0.125	13
PLAAT4	0.377502	6.06906e-23	2.04612e-18	0.796	0.605	13
GIMAP1	0.339214	1.22403e-22	4.12669e-18	0.55	0.339	13
CD48	0.360871	3.10355e-21	1.04633e-16	0.826	0.682	13
PSMB10	0.358148	1.1145e-20	3.75742e-16	0.617	0.425	13
TMEM123	0.338139	4.22316e-19	1.4238e-14	0.706	0.552	13
ZNFX1	0.321193	3.61057e-18	1.21727e-13	0.336	0.182	13
SMCHD1	0.328332	1.07913e-17	3.63819e-13	0.667	0.5	13
CD164	0.325263	1.25736e-17	4.23906e-13	0.607	0.434	13
PSMB8	0.360638	1.56102e-17	5.26281e-13	0.652	0.496	13
CCR7	0.430691	2.903e-17	9.78717e-13	0.634	0.453	13
IFITM3	0.456365	4.55876e-16	1.53694e-11	0.498	0.349	13
PML	0.307238	7.90952e-16	2.66662e-11	0.291	0.157	13
TAP2	0.353625	1.2436e-15	4.19268e-11	0.42	0.269	13
CASP1	0.349512	1.8031e-14	6.07896e-10	0.331	0.187	13
DYNLT1	0.343134	2.1626e-14	7.29097e-10	0.331	0.188	13
PLAC8	0.398262	4.58211e-14	1.54481e-09	0.435	0.285	13
ALOX5AP	0.373825	5.74603e-14	1.93722e-09	0.595	0.427	13
SLFN5	0.317459	6.85812e-14	2.31215e-09	0.485	0.334	13
LYSMD2	0.257494	4.31135e-13	1.45353e-08	0.356	0.213	13
SAT1	0.322565	6.03271e-13	2.03387e-08	0.776	0.644	13
RBCK1	0.301233	1.33754e-12	4.5094e-08	0.45	0.31	13
C5orf56	0.266123	3.39833e-12	1.14571e-07	0.313	0.185	13
TRADD	0.258472	1.00712e-11	3.39541e-07	0.43	0.287	13
GBP2	0.268289	2.82276e-11	9.51665e-07	0.46	0.313	13
LGALS3BP	0.255407	3.36773e-11	1.1354e-06	0.266	0.152	13
CASP4	0.279949	2.785e-10	9.38936e-06	0.42	0.295	13
SHISA5	0.260297	5.04653e-10	1.70139e-05	0.493	0.373	13
GBP5	0.355453	1.43627e-09	4.84223e-05	0.376	0.25	13
SELL	0.35339	1.69086e-09	5.70058e-05	0.557	0.452	13
N4BP1	0.263407	4.98221e-09	0.00016797	0.294	0.192	13
IRF1	0.253535	9.23136e-08	0.00311226	0.677	0.558	13
KRT18	1.92245	0	0	0.963	0.068	14
WFDC2	1.73911	0	0	0.927	0.029	14
LYZ	1.69179	0	0	0.751	0.034	14
IGFBP2	1.3055	0	0	0.867	0.017	14
MIR205HG	1.29219	0	0	0.788	0.013	14
KRT8	1.26761	0	0	0.921	0.04	14
PDLIM1	1.26558	0	0	0.912	0.023	14
FGGY	1.19373	0	0	0.847	0.029	14
GCLC	1.1223	0	0	0.884	0.051	14
MT3	1.11639	0	0	0.681	0.009	14
CREG1	1.11093	0	0	0.887	0.069	14
YBX3	1.10563	0	0	0.907	0.064	14
CD24	1.09275	0	0	0.836	0.024	14
NUPR1	1.08798	0	0	0.743	0.026	14
RAB3C	1.0485	0	0	0.805	0.007	14
CXCL8	1.02682	0	0	0.483	0.02	14
DUSP23	0.981294	0	0	0.791	0.111	14
PTMS	0.974694	0	0	0.901	0.077	14
ADIRF	0.921201	0	0	0.76	0.015	14
TMEM176B	0.915568	0	0	0.774	0.012	14
MDK	0.902169	0	0	0.746	0.031	14
PDK4	0.887771	0	0	0.74	0.006	14
MRPL12	0.883287	0	0	0.867	0.129	14
KLF4	0.856089	0	0	0.794	0.05	14
FXYD3	0.824319	0	0	0.723	0.02	14
CLDN4	0.819458	0	0	0.74	0.022	14
TMEM176A	0.755257	0	0	0.684	0.01	14
KIT	0.739933	0	0	0.706	0.008	14
CYB5A	0.738368	0	0	0.862	0.131	14
C19orf48	0.731971	0	0	0.794	0.088	14
C15orf48	0.703857	0	0	0.441	0.017	14
DYRK4	0.690662	0	0	0.76	0.066	14
NFIA	0.678443	0	0	0.743	0.045	14
SOX4	0.665558	0	0	0.593	0.05	14
CKB	0.664121	0	0	0.715	0.027	14
DUSP6	0.660741	0	0	0.633	0.053	14
PCBD1	0.655879	0	0	0.811	0.096	14
RAB13	0.636236	0	0	0.732	0.016	14
CST3	0.630983	0	0	0.774	0.065	14
GFI1B	0.626219	0	0	0.647	0.004	14
SPRR2A	0.625744	0	0	0.367	0.005	14
CRYM	0.612309	0	0	0.573	0.005	14
RAB25	0.589104	0	0	0.684	0.015	14
CD9	0.585281	0	0	0.692	0.039	14
CHPT1	0.553957	0	0	0.692	0.08	14
SERPINF1	0.543358	0	0	0.61	0.012	14
PLAU	0.540344	0	0	0.489	0.007	14
CFD	0.540116	0	0	0.599	0.024	14
METTL7A	0.539827	0	0	0.582	0.022	14
TRIP6	0.521267	0	0	0.616	0.025	14
PRXL2A	0.514202	0	0	0.65	0.031	14
MGST1	0.509783	0	0	0.605	0.017	14
DST	0.492425	0	0	0.489	0.015	14
RAMP2	0.48924	0	0	0.579	0.006	14
EPCAM	0.488214	0	0	0.61	0.02	14
RASSF6	0.480544	0	0	0.514	0.01	14
PRSS21	0.480059	0	0	0.556	0.014	14
PLA1A	0.477017	0	0	0.511	0.004	14
TACSTD2	0.473132	0	0	0.52	0.016	14
HES1	0.468246	0	0	0.452	0.017	14
KRT19	0.463694	0	0	0.534	0.045	14
TCF4	0.454036	0	0	0.556	0.015	14
LINC01564	0.452695	0	0	0.52	0.004	14
NPM3	0.452162	0	0	0.627	0.054	14
RAB32	0.441424	0	0	0.446	0.006	14
S100A13	0.437139	0	0	0.556	0.016	14
LINC01326	0.431139	0	0	0.537	0.003	14
TRIB1	0.429316	0	0	0.559	0.054	14
CALML3	0.425447	0	0	0.5	0.007	14
PPP1R16A	0.42221	0	0	0.548	0.032	14
TNFAIP2	0.421554	0	0	0.458	0.007	14
CAMP	0.415933	0	0	0.362	0.004	14
PLPP2	0.41589	0	0	0.486	0.015	14
PAX1	0.407319	0	0	0.424	0.003	14
SMIM22	0.405461	0	0	0.525	0.009	14
SPHK1	0.404136	0	0	0.483	0.008	14
HOXB6	0.402382	0	0	0.407	0.007	14
CCND1	0.4023	0	0	0.508	0.023	14
HAP1	0.393802	0	0	0.455	0.005	14
HOXB5	0.389258	0	0	0.444	0.007	14
SMCO4	0.388069	0	0	0.528	0.047	14
PAWR	0.385404	0	0	0.483	0.009	14
CEBPA	0.383019	0	0	0.483	0.023	14
CD27-AS1	0.381013	0	0	0.534	0.027	14
SOX9	0.380583	0	0	0.427	0.008	14
RNASE6	0.379635	0	0	0.404	0.013	14
IGFBP6	0.379294	0	0	0.325	0.008	14
LINC00958	0.374929	0	0	0.458	0.004	14
SIX1	0.369954	0	0	0.472	0.007	14
MSRB1	0.364885	0	0	0.52	0.039	14
KRTCAP3	0.364838	0	0	0.458	0.012	14
HOXB9	0.361034	0	0	0.435	0.006	14
TPM2	0.355885	0	0	0.418	0.021	14
ESPN	0.355365	0	0	0.466	0.02	14
GSTO2	0.353399	0	0	0.444	0.011	14
HES6	0.34473	0	0	0.438	0.017	14
FAM3B	0.344424	0	0	0.418	0.005	14
NEURL1	0.341077	0	0	0.458	0.016	14
CAMK2B	0.340972	0	0	0.384	0.004	14
CSF3	0.335609	0	0	0.288	0.002	14
LTBR	0.333952	0	0	0.404	0.007	14
ELFN1-AS1	0.324939	0	0	0.429	0.003	14
PLAT	0.320988	0	0	0.305	0.01	14
CXXC5	0.320602	0	0	0.418	0.015	14
MGST2	0.32057	0	0	0.472	0.031	14
ADM	0.319178	0	0	0.294	0.008	14
PLAGL1	0.319014	0	0	0.449	0.025	14
BCAT1	0.316242	0	0	0.429	0.009	14
SDSL	0.311705	0	0	0.393	0.004	14
NCKAP5	0.310282	0	0	0.398	0.004	14
MACROD1	0.308288	0	0	0.449	0.027	14
MAB21L2	0.308197	0	0	0.356	0.002	14
PODXL2	0.303099	0	0	0.412	0.018	14
LYN	0.301186	0	0	0.418	0.011	14
GCSH	0.300826	0	0	0.497	0.04	14
HOXB8	0.298957	0	0	0.37	0.006	14
METTL27	0.297329	0	0	0.395	0.01	14
CREB5	0.294281	0	0	0.353	0.004	14
TPD52L1	0.290864	0	0	0.401	0.005	14
KCNN3	0.283961	0	0	0.39	0.002	14
LINC01551	0.283816	0	0	0.336	0.003	14
SLPI	0.280609	0	0	0.359	0.021	14
MARCKS	0.277463	0	0	0.359	0.017	14
SIX2	0.275404	0	0	0.336	0.002	14
ZNF750	0.274823	0	0	0.328	0.002	14
CDH1	0.270574	0	0	0.373	0.008	14
HCK	0.270477	0	0	0.336	0.004	14
PGF	0.269036	0	0	0.294	0.005	14
CDC42EP1	0.26861	0	0	0.362	0.005	14
HNMT	0.264787	0	0	0.347	0.005	14
ASCL2	0.261081	0	0	0.364	0.013	14
MIR200CHG	0.251686	0	0	0.35	0.003	14
PAK1	0.331979	6.15675e-306	2.07569e-301	0.508	0.046	14
GM2A	0.358662	4.30442e-303	1.45119e-298	0.441	0.035	14
AHCY	0.561503	1.27022e-301	4.28241e-297	0.726	0.096	14
PHLDA2	0.496892	2.2663e-285	7.6406e-281	0.548	0.057	14
H1F0	0.330272	1.78065e-283	6.00328e-279	0.398	0.031	14
MYL6B	0.364399	3.20653e-281	1.08105e-276	0.579	0.063	14
SLC25A4	0.304602	1.1392e-276	3.84071e-272	0.494	0.047	14
ZNF581	0.66081	4.76296e-264	1.60578e-259	0.777	0.126	14
MPST	0.328739	6.02201e-260	2.03026e-255	0.559	0.063	14
MCRIP2	0.417436	1.70066e-256	5.7336e-252	0.633	0.082	14
PERP	0.509638	3.10122e-254	1.04555e-249	0.76	0.115	14
NT5C3B	0.341873	1.25223e-252	4.22178e-248	0.596	0.073	14
NBEAL1	0.452466	2.18173e-250	7.3555e-246	0.701	0.1	14
NME1	0.601773	4.94501e-247	1.66716e-242	0.805	0.138	14
EPB41L4A-AS1	1.0332	2.10726e-244	7.10443e-240	0.946	0.249	14
EIF4EBP3	0.283497	1.36157e-243	4.59039e-239	0.503	0.055	14
TIMM13	0.770771	8.86807e-243	2.98978e-238	0.867	0.176	14
MRPL45	0.485224	5.77139e-240	1.94577e-235	0.689	0.104	14
NUDT14	0.325587	1.05576e-236	3.5594e-232	0.599	0.077	14
FCGRT	0.47222	4.80382e-234	1.61956e-229	0.695	0.106	14
FKBP4	0.53637	1.10733e-224	3.73327e-220	0.78	0.138	14
NME2	1.91683	2.00297e-223	6.75282e-219	0.994	0.602	14
CDK4	0.507659	1.81537e-221	6.12033e-217	0.746	0.129	14
BLVRA	0.422251	1.32847e-217	4.47881e-213	0.616	0.089	14
GSTP1	1.28671	3.80659e-216	1.28335e-211	0.975	0.393	14
SPHK2	0.269967	4.40646e-214	1.48559e-209	0.455	0.051	14
HMGA1	1.04898	7.83602e-214	2.64184e-209	0.944	0.306	14
[truncated: 2,429 more rows]

## Sheet: CD8+ T cells
Table S2. List of genes specific to the cell clusters in total cells and each cell lineage.
gene	avg_logFC	p_val	p_val_adj	pct.1	pct.2	cluster
TMSB4X	0.513312	0	0	0.996	0.97	0
RPL13A	0.786388	2.94498e-266	9.92872e-262	0.932	0.909	0
RPL27A	0.766606	3.07165e-261	1.03558e-256	0.904	0.878	0
B2M	0.307589	9.16679e-242	3.09049e-237	0.998	0.985	0
RPL23A	0.471258	2.11728e-223	7.13819e-219	0.967	0.94	0
RPS29	0.585495	8.5825e-215	2.89351e-210	0.938	0.913	0
GZMK	0.707491	2.16953e-204	7.31434e-200	0.737	0.46	0
RPL31	0.552173	4.64074e-182	1.56458e-177	0.892	0.875	0
RPLP2	0.398538	5.39446e-181	1.81869e-176	0.974	0.942	0
RPS17	0.682805	3.48082e-174	1.17352e-169	0.8	0.745	0
RPL7	0.562506	1.3709e-170	4.62186e-166	0.869	0.855	0
RPS20	0.649187	1.81603e-168	6.12258e-164	0.822	0.791	0
IGKC	0.826293	1.8461e-160	6.22396e-156	0.387	0.153	0
TRAC	0.715953	2.43332e-155	8.20368e-151	0.712	0.583	0
RPL17	0.375481	2.08428e-150	7.02693e-146	0.957	0.932	0
MALAT1	0.290916	1.35775e-148	4.57751e-144	0.986	0.997	0
RPS10	0.667372	1.76024e-145	5.93449e-141	0.67	0.504	0
RPL21	0.378681	5.005e-131	1.68738e-126	0.96	0.942	0
RPS27	0.262813	5.93481e-122	2.00086e-117	0.994	0.968	0
RPL15	0.316968	4.35169e-119	1.46713e-114	0.953	0.932	0
RPS2	0.314621	2.367e-115	7.98012e-111	0.978	0.953	0
IGLC2	0.790178	8.83818e-114	2.9797e-109	0.265	0.097	0
RPS18	0.250523	2.02264e-108	6.81911e-104	0.988	0.956	0
RPS11	0.42292	1.40951e-105	4.75202e-101	0.852	0.868	0
GZMA	0.375899	3.82943e-94	1.29105e-89	0.855	0.726	0
RPS16	0.285145	1.98311e-92	6.68586e-88	0.946	0.931	0
RPL23	0.456081	3.27132e-89	1.10289e-84	0.762	0.78	0
RPL3	0.25141	6.85136e-84	2.30987e-79	0.966	0.941	0
CCL5	0.265602	7.70426e-82	2.59741e-77	0.981	0.855	0
RPL27	0.290325	3.27126e-80	1.10287e-75	0.896	0.895	0
OAZ1	0.309876	2.53954e-68	8.56181e-64	0.848	0.867	0
RPL38	0.291843	7.05747e-56	2.37936e-51	0.833	0.855	0
HLA-DPB1	0.403289	6.1861e-52	2.08558e-47	0.692	0.675	0
RPL36AL	0.262376	4.79979e-41	1.6182e-36	0.789	0.845	0
UQCRB	0.331467	5.54899e-38	1.87079e-33	0.686	0.745	0
TRBC2	0.408303	8.26464e-36	2.78634e-31	0.661	0.676	0
HLA-DRA	0.420805	2.33418e-33	7.86945e-29	0.537	0.464	0
CMC1	0.51158	3.03897e-33	1.02456e-28	0.426	0.359	0
HLA-DRB1	0.310381	5.39539e-30	1.819e-25	0.653	0.613	0
LYAR	0.440772	6.8299e-24	2.30263e-19	0.4	0.361	0
HLA-DPA1	0.288772	6.20087e-23	2.09056e-18	0.629	0.625	0
COTL1	0.258275	3.82667e-21	1.29012e-16	0.658	0.657	0
GZMM	0.304972	1.53441e-17	5.17311e-13	0.551	0.593	0
LINC-PINT	0.342933	1.91956e-17	6.47161e-13	0.368	0.326	0
TRBC1	0.532019	3.42965e-16	1.15627e-11	0.484	0.502	0
LIME1	0.289831	1.78944e-13	6.03293e-09	0.543	0.595	0
HLA-DQB1	0.30707	5.32884e-10	1.79656e-05	0.383	0.369	0
GMFG	0.260871	1.89209e-08	0.000637899	0.563	0.669	0
CXCL13	1.68989	0	0	0.485	0.059	1
TRBV9	1.68929	0	0	0.398	0.068	1
CCL3	1.30791	0	0	0.669	0.187	1
LAG3	1.2359	0	0	0.87	0.377	1
FXYD2	1.17246	0	0	0.389	0.077	1
HAVCR2	1.14071	0	0	0.684	0.095	1
TNFRSF9	1.12151	0	0	0.516	0.05	1
CTLA4	1.06334	0	0	0.65	0.11	1
IFNG	1.00106	0	0	0.743	0.285	1
CD27	1.0003	0	0	0.759	0.37	1
DUSP4	0.974161	0	0	0.849	0.31	1
RGS1	0.970528	0	0	0.892	0.474	1
CD82	0.952151	0	0	0.699	0.194	1
TIGIT	0.936215	0	0	0.745	0.264	1
PHLDA1	0.933205	0	0	0.614	0.177	1
PDCD1	0.897897	0	0	0.614	0.124	1
GAPDH	0.881729	0	0	0.996	0.895	1
CXCR6	0.875838	0	0	0.578	0.138	1
PTMS	0.860519	0	0	0.768	0.266	1
VCAM1	0.836804	0	0	0.465	0.069	1
CSF1	0.815485	0	0	0.459	0.064	1
ACP5	0.799821	0	0	0.567	0.135	1
TRAV14DV4	0.773994	0	0	0.339	0.046	1
TOX	0.769016	0	0	0.607	0.169	1
SIRPG	0.758297	0	0	0.636	0.191	1
IGFLR1	0.745103	0	0	0.611	0.203	1
ENTPD1	0.737802	0	0	0.399	0.033	1
SNX9	0.701356	0	0	0.513	0.143	1
LYST	0.700347	0	0	0.719	0.276	1
ADGRG1	0.683573	0	0	0.477	0.124	1
TTN	0.660873	0	0	0.495	0.134	1
LINC01943	0.649287	0	0	0.323	0.052	1
SNAP47	0.62905	0	0	0.477	0.108	1
TNIP3	0.607216	0	0	0.441	0.09	1
NDFIP2	0.584765	0	0	0.374	0.068	1
MIR155HG	0.580266	0	0	0.351	0.059	1
LAYN	0.571212	0	0	0.26	0.015	1
TOX2	0.500806	0	0	0.299	0.037	1
AC243829.4	0.491591	0	0	0.334	0.053	1
TSHZ2	0.472794	0	0	0.285	0.035	1
AKAP5	0.459367	1.43347e-304	4.83279e-300	0.284	0.04	1
CD38	0.511747	5.9462e-297	2.0047e-292	0.451	0.112	1
CD8A	0.733682	7.17192e-288	2.41794e-283	0.922	0.684	1
SARDH	0.414622	6.83382e-286	2.30395e-281	0.252	0.034	1
CCND2	0.681384	3.77749e-279	1.27354e-274	0.699	0.31	1
PRDM1	0.655181	1.79918e-273	6.06574e-269	0.544	0.185	1
DGKH	0.403808	2.92435e-273	9.85915e-269	0.293	0.051	1
NBL1	0.624444	2.56309e-269	8.6412e-265	0.391	0.097	1
SIT1	0.625617	7.60855e-269	2.56515e-264	0.643	0.263	1
APOBEC3C	0.588915	3.0003e-264	1.01152e-259	0.641	0.253	1
BATF	0.688259	4.91509e-262	1.65707e-257	0.534	0.186	1
APOBEC3G	0.624124	1.83013e-260	6.17009e-256	0.846	0.464	1
TRAF5	0.61786	1.73758e-255	5.85806e-251	0.528	0.19	1
HLA-A	0.376971	1.37699e-254	4.64238e-250	0.999	0.972	1
GALNT1	0.503478	2.97008e-250	1.00133e-245	0.441	0.13	1
GALNT2	0.527846	1.00197e-249	3.37804e-245	0.388	0.1	1
RBPJ	0.696216	5.01135e-249	1.68953e-244	0.593	0.234	1
TRGV10	0.761352	5.34875e-249	1.80328e-244	0.36	0.09	1
TNFRSF1B	0.674606	1.37849e-248	4.64742e-244	0.708	0.337	1
PMAIP1	1.02804	1.99915e-246	6.73995e-242	0.616	0.281	1
BST2	0.586363	1.22583e-243	4.13275e-239	0.763	0.386	1
SYNGR2	0.649084	8.95149e-243	3.01791e-238	0.605	0.265	1
FUT8	0.452354	3.57346e-242	1.20476e-237	0.405	0.114	1
ITM2A	0.686004	3.20564e-241	1.08075e-236	0.796	0.448	1
ANXA5	0.583147	3.45127e-240	1.16356e-235	0.729	0.347	1
ASB2	0.383399	2.03434e-239	6.85859e-235	0.267	0.048	1
TBC1D4	0.422726	3.13814e-239	1.05799e-234	0.278	0.053	1
FAM3C	0.568018	6.13847e-237	2.06952e-232	0.371	0.097	1
GZMB	0.895313	9.3688e-237	3.1586e-232	0.825	0.431	1
RAB27A	0.558747	9.6946e-236	3.26844e-231	0.634	0.268	1
CCDC141	0.402334	2.75797e-234	9.29821e-230	0.3	0.063	1
FKBP1A	0.543438	2.3319e-231	7.86175e-227	0.727	0.361	1
HLA-DRB5	0.574773	1.9685e-230	6.6366e-226	0.686	0.292	1
CD200R1	0.411711	4.85646e-229	1.63731e-224	0.273	0.053	1
FASLG	0.457848	4.73852e-228	1.59755e-223	0.431	0.128	1
CTSD	0.558052	6.08497e-225	2.05149e-220	0.81	0.47	1
RHOB	0.923265	9.90619e-225	3.33977e-220	0.565	0.238	1
CD63	0.612945	3.31739e-220	1.11843e-215	0.821	0.463	1
CD3D	0.49444	3.47548e-220	1.17172e-215	0.973	0.778	1
NAB1	0.404512	7.58562e-219	2.55742e-214	0.337	0.083	1
ID3	0.621146	1.54429e-217	5.20643e-213	0.33	0.083	1
PRF1	0.566652	1.13286e-216	3.81932e-212	0.85	0.478	1
SPATS2L	0.396754	3.18522e-216	1.07386e-211	0.388	0.108	1
HLA-DQA1	0.588346	8.13682e-216	2.74325e-211	0.587	0.231	1
ITGAE	0.601413	7.51932e-211	2.53506e-206	0.531	0.208	1
DUSP16	0.457002	2.20279e-209	7.4265e-205	0.379	0.111	1
DUSP5	0.632925	3.67295e-207	1.2383e-202	0.532	0.213	1
CRIM1	0.368035	1.57994e-204	5.32662e-200	0.278	0.061	1
UBE2F	0.511889	1.96352e-201	6.61981e-197	0.453	0.162	1
COTL1	0.514095	3.27481e-201	1.10407e-196	0.922	0.611	1
GALM	0.437522	2.67795e-200	9.02846e-196	0.461	0.158	1
IL2RB	0.524188	5.44355e-200	1.83524e-195	0.714	0.359	1
UBC	0.461319	7.00568e-199	2.36189e-194	0.984	0.898	1
PLPP1	0.416186	2.11032e-197	7.11474e-193	0.268	0.06	1
HLA-DPA1	0.503339	1.94415e-196	6.5545e-192	0.901	0.578	1
PTPN6	0.629925	3.3287e-195	1.12224e-190	0.621	0.308	1
IKZF3	0.50511	3.61762e-193	1.21964e-188	0.711	0.362	1
SH2D2A	0.537696	8.18006e-191	2.75782e-186	0.674	0.337	1
TRPS1	0.382283	1.25865e-189	4.2434e-185	0.35	0.101	1
GFOD1	0.355411	4.9557e-188	1.67076e-183	0.258	0.056	1
HLA-DRB1	0.519766	1.1589e-187	3.90712e-183	0.91	0.57	1
IFI6	0.511899	1.41138e-187	4.75832e-183	0.671	0.325	1
CCL5	0.446505	6.74541e-186	2.27415e-181	0.992	0.858	1
HLA-DMA	0.456823	3.90883e-184	1.31782e-179	0.598	0.26	1
CD2	0.467431	7.76097e-184	2.61653e-179	0.928	0.681	1
PARK7	0.489255	2.41091e-180	8.12815e-176	0.801	0.489	1
RGS2	0.63714	1.97243e-178	6.64984e-174	0.624	0.305	1
FABP5	0.511737	4.72649e-176	1.59349e-171	0.573	0.247	1
PKM	0.568638	1.42964e-174	4.8199e-170	0.771	0.47	1
EPSTI1	0.446008	3.88564e-173	1.31e-168	0.471	0.18	1
TYMP	0.446769	1.87506e-172	6.32156e-168	0.577	0.248	1
MCM5	0.357128	2.72849e-170	9.19883e-166	0.294	0.081	1
SCAMP2	0.413097	2.86042e-167	9.64362e-163	0.584	0.273	1
CD7	0.563832	7.27344e-166	2.45217e-161	0.898	0.66	1
OASL	0.405777	7.36146e-165	2.48184e-160	0.586	0.262	1
CCR5	0.341743	1.04008e-162	3.50652e-158	0.329	0.099	1
METRNL	0.462266	6.60675e-162	2.2274e-157	0.594	0.268	1
LCP2	0.484596	1.38534e-160	4.67052e-156	0.754	0.465	1
STX11	0.397138	4.23682e-160	1.4284e-155	0.379	0.129	1
ZNRF1	0.36576	1.09827e-158	3.7027e-154	0.34	0.108	1
CARD16	0.444275	8.10911e-158	2.7339e-153	0.581	0.274	1
CD2BP2	0.38616	1.70654e-156	5.75344e-152	0.433	0.169	1
CHST12	0.405409	5.6067e-155	1.89024e-150	0.673	0.354	1
PAG1	0.427353	1.12256e-154	3.7846e-150	0.572	0.274	1
PGAM1	0.453632	2.96732e-154	1.0004e-149	0.685	0.387	1
HNRNPLL	0.348763	1.30262e-149	4.39164e-145	0.48	0.198	1
HLA-DQB1	0.445605	1.18024e-147	3.97905e-143	0.647	0.324	1
PSMB8	0.409478	1.89045e-147	6.37346e-143	0.807	0.508	1
PTPRJ	0.364347	2.67973e-146	9.03444e-142	0.421	0.167	1
YWHAH	0.403701	1.79855e-145	6.06364e-141	0.477	0.207	1
PSMB9	0.381361	2.37264e-144	7.99912e-140	0.913	0.661	1
STAT3	0.466834	5.15601e-143	1.7383e-138	0.739	0.459	1
LIMS1	0.342715	8.70913e-143	2.93619e-138	0.373	0.135	1
HSPB1	0.465156	1.47221e-142	4.96341e-138	0.611	0.322	1
TAP1	0.384634	1.64837e-142	5.55731e-138	0.738	0.432	1
WHRN	0.294619	8.75647e-142	2.95216e-137	0.292	0.089	1
CD74	0.53499	4.01966e-140	1.35519e-135	0.96	0.836	1
RHOA	0.387209	4.28677e-140	1.44524e-135	0.886	0.65	1
NEDD9	0.361294	4.54231e-140	1.53139e-135	0.406	0.16	1
PCED1B	0.343902	5.77545e-140	1.94713e-135	0.374	0.14	1
CBLB	0.394569	1.20614e-139	4.06639e-135	0.631	0.334	1
CHST11	0.358843	7.73264e-139	2.60698e-134	0.529	0.246	1
CD8B	0.461596	5.53528e-138	1.86616e-133	0.849	0.584	1
SLF1	0.337814	5.67707e-138	1.91397e-133	0.41	0.16	1
HLA-DRA	0.492949	1.0622e-137	3.58109e-133	0.749	0.43	1
CARS	0.413436	1.48463e-137	5.00527e-133	0.372	0.144	1
NKG7	0.345672	1.99235e-137	6.71701e-133	0.981	0.797	1
IFI27L2	0.342045	2.71485e-137	9.15285e-133	0.562	0.264	1
CTSC	0.407867	4.17262e-137	1.40676e-132	0.772	0.457	1
MX1	0.425136	7.73994e-137	2.60944e-132	0.5	0.228	1
LINC00963	0.321836	1.18762e-135	4.00393e-131	0.294	0.093	1
AGFG1	0.340169	5.53087e-135	1.86468e-130	0.36	0.136	1
ADORA2A	0.289885	8.55191e-135	2.88319e-130	0.293	0.093	1
MBD2	0.357101	2.47994e-134	8.36086e-130	0.468	0.211	1
CD3G	0.388817	1.03695e-133	3.49598e-129	0.855	0.594	1
IGF2R	0.413082	1.37363e-133	4.63106e-129	0.463	0.211	1
CD81	0.488644	4.05879e-133	1.36838e-128	0.752	0.487	1
LSP1	0.396477	2.56105e-132	8.63434e-128	0.913	0.711	1
CTSB	0.328593	2.58255e-132	8.7068e-128	0.356	0.132	1
TNFSF10	0.333143	1.43585e-131	4.84084e-127	0.373	0.142	1
PDE4DIP	0.353496	1.75258e-131	5.90864e-127	0.403	0.164	1
KLRC2	0.376095	1.84404e-131	6.21699e-127	0.346	0.122	1
RABAC1	0.388453	1.90176e-129	6.41158e-125	0.793	0.516	1
S100PBP	0.284521	2.55504e-129	8.61405e-125	0.315	0.108	1
PRDX5	0.371477	8.02616e-129	2.70594e-124	0.701	0.402	1
CALM3	0.367831	2.88842e-128	9.73801e-124	0.733	0.438	1
RHOC	0.37355	8.94568e-128	3.01595e-123	0.559	0.275	1
IER5L	0.421324	3.87244e-127	1.30555e-122	0.415	0.176	1
RALA	0.367174	3.04382e-126	1.02619e-121	0.42	0.181	1
PRR5L	0.318364	3.16834e-126	1.06817e-121	0.274	0.087	1
ICOS	0.366829	3.55306e-126	1.19788e-121	0.417	0.174	1
PSTPIP1	0.338702	4.56166e-126	1.53792e-121	0.602	0.316	1
GBP5	0.393529	1.78772e-125	6.02711e-121	0.627	0.335	1
CDK2AP2	0.394012	3.02674e-125	1.02044e-120	0.6	0.319	1
RIN3	0.353684	1.15893e-124	3.90721e-120	0.382	0.156	1
UTS2	0.296238	4.03686e-124	1.36099e-119	0.364	0.138	1
CLIC1	0.337179	4.88741e-124	1.64774e-119	0.938	0.708	1
SYT11	0.328917	1.10309e-123	3.71895e-119	0.34	0.128	1
GGA2	0.289453	2.21444e-123	7.46576e-119	0.452	0.197	1
HSPA1A	0.420505	6.72239e-123	2.26639e-118	0.544	0.274	1
PTTG1	0.296982	7.93211e-123	2.67423e-118	0.367	0.141	1
PTPN7	0.32908	3.60496e-122	1.21537e-117	0.676	0.379	1
PPM1G	0.33337	8.36767e-122	2.82108e-117	0.572	0.294	1
RGS3	0.296343	1.56212e-121	5.26654e-117	0.294	0.101	1
TPI1	0.409346	2.12553e-121	7.16601e-117	0.833	0.568	1
PLSCR1	0.327905	2.46903e-121	8.32407e-117	0.411	0.171	1
AHR	0.329358	4.208e-121	1.41868e-116	0.314	0.114	1
IFI16	0.359629	4.99648e-121	1.68451e-116	0.639	0.345	1
DNPH1	0.346184	9.24986e-120	3.1185e-115	0.39	0.163	1
ASXL2	0.32964	1.98885e-119	6.70521e-115	0.389	0.163	1
CLSTN3	0.279574	9.58629e-119	3.23192e-114	0.327	0.121	1
IFI35	0.299622	1.97986e-118	6.67491e-114	0.463	0.208	1
DRAP1	0.354252	3.13547e-118	1.05709e-113	0.814	0.547	1
PAM	0.25074	5.31203e-118	1.7909e-113	0.269	0.087	1
LBH	0.494118	6.9304e-118	2.33652e-113	0.688	0.437	1
CTSA	0.359678	1.50127e-117	5.06138e-113	0.509	0.255	1
BUB3	0.327886	2.39649e-117	8.07953e-113	0.673	0.387	1
SEM1	0.331769	2.63705e-117	8.89055e-113	0.689	0.4	1
GNG5	0.34259	4.48953e-117	1.5136e-112	0.691	0.402	1
WSB2	0.258539	1.47953e-116	4.98809e-112	0.269	0.089	1
GFI1	0.254869	2.47074e-116	8.32984e-112	0.27	0.088	1
CKLF	0.398814	2.86634e-116	9.66359e-112	0.735	0.442	1
CTSZ	0.266984	4.24003e-116	1.42948e-111	0.313	0.115	1
IL2RG	0.364459	5.46243e-115	1.8416e-110	0.904	0.692	1
CLEC2D	0.379202	7.10001e-115	2.3937e-110	0.742	0.466	1
TRIM8	0.316411	8.15586e-115	2.74967e-110	0.367	0.152	1
RNF19A	0.351313	1.85687e-114	6.26025e-110	0.617	0.343	1
CSK	0.362776	5.58609e-114	1.8833e-109	0.664	0.396	1
TLN1	0.365926	5.66926e-114	1.91134e-109	0.677	0.402	1
RAB1B	0.349097	8.20139e-114	2.76502e-109	0.53	0.28	1
HLA-DPB1	0.312486	2.05487e-112	6.92779e-108	0.899	0.64	1
PFKP	0.286841	4.44634e-112	1.49904e-107	0.379	0.159	1
UBE2L6	0.327853	5.17021e-112	1.74309e-107	0.671	0.384	1
KLRC4	0.362202	1.05776e-111	3.56612e-107	0.351	0.143	1
CYTOR	0.31483	3.49656e-111	1.17883e-106	0.668	0.371	1
PMF1	0.275428	3.74641e-111	1.26307e-106	0.431	0.191	1
ACTN4	0.283183	8.52987e-111	2.87576e-106	0.631	0.338	1
GTPBP8	0.301499	1.85032e-110	6.23816e-106	0.251	0.083	1
CD3E	0.335737	2.13235e-110	7.189e-106	0.941	0.786	1
GPR137B	0.265103	1.28408e-109	4.32914e-105	0.287	0.102	1
B3GNT2	0.391295	1.58945e-109	5.35869e-105	0.477	0.241	1
CARHSP1	0.278269	1.9304e-108	6.50813e-104	0.419	0.187	1
ISG15	0.300545	2.78826e-108	9.40035e-104	0.719	0.416	1
ARID5B	0.372255	3.36776e-108	1.13541e-103	0.502	0.248	1
PDIA6	0.336056	3.4915e-108	1.17713e-103	0.586	0.316	1
LGALS3	0.332971	1.36782e-106	4.61148e-102	0.541	0.27	1
PSME2	0.331045	3.24696e-106	1.09468e-101	0.858	0.601	1
PSMB3	0.298623	3.67791e-106	1.23997e-101	0.693	0.406	1
CCL4L2	0.275065	1.00448e-105	3.38649e-101	0.679	0.381	1
DGKZ	0.355527	1.54114e-105	5.19581e-101	0.589	0.338	1
SOD1	0.391229	3.45862e-105	1.16604e-100	0.838	0.61	1
PPP1R16B	0.258029	2.928e-104	9.87145e-100	0.459	0.219	1
SURF4	0.314141	4.13169e-104	1.39296e-99	0.548	0.291	1
PLAAT3	0.263654	1.17538e-103	3.96266e-99	0.479	0.227	1
NAP1L4	0.317151	1.19417e-103	4.02604e-99	0.615	0.351	1
GATA3	0.358552	3.20333e-102	1.07997e-97	0.501	0.259	1
SPTAN1	0.333778	1.64319e-101	5.53984e-97	0.582	0.33	1
PHPT1	0.277318	2.57235e-101	8.67243e-97	0.494	0.242	1
SAMSN1	0.406937	3.71053e-101	1.25097e-96	0.618	0.358	1
MAP2K2	0.311683	4.85906e-101	1.63818e-96	0.596	0.343	1
SLA2	0.2642	7.89299e-101	2.66104e-96	0.499	0.247	1
BHLHE40	0.342442	7.98888e-100	2.69337e-95	0.626	0.347	1
COPZ1	0.26894	2.2017e-99	7.4228e-95	0.445	0.214	1
ZFP36L1	0.412591	2.32445e-99	7.83665e-95	0.793	0.554	1
STAT1	0.340203	3.39906e-99	1.14596e-94	0.59	0.328	1
ABCG1	0.272407	7.65432e-99	2.58058e-94	0.328	0.135	1
TMEM179B	0.276138	3.91549e-98	1.32007e-93	0.447	0.215	1
LY6E	0.329603	6.30754e-98	2.12652e-93	0.868	0.637	1
PSMA5	0.292629	9.2055e-98	3.10354e-93	0.588	0.328	1
EOMES	0.365433	1.83346e-97	6.18132e-93	0.398	0.186	1
CXCR3	0.338634	2.86206e-97	9.64916e-93	0.592	0.331	1
CSNK2B	0.30921	3.36684e-97	1.1351e-92	0.655	0.4	1
COX8A	0.29378	4.26314e-97	1.43727e-92	0.799	0.543	1
GNAI2	0.329721	4.78844e-97	1.61437e-92	0.765	0.508	1
XAF1	0.319914	1.62282e-96	5.47118e-92	0.525	0.276	1
RAB3GAP1	0.271606	3.30786e-96	1.11521e-91	0.285	0.111	1
CST7	0.412717	7.5429e-96	2.54301e-91	0.929	0.728	1
GNAS	0.327612	7.56563e-96	2.55068e-91	0.845	0.627	1
TWF2	0.304044	1.29123e-95	4.35325e-91	0.527	0.288	1
OAS1	0.259487	1.50314e-95	5.06768e-91	0.263	0.094	1
PRKCH	0.308166	1.78509e-95	6.01825e-91	0.699	0.446	1
PARVG	0.26324	1.22188e-94	4.11943e-90	0.502	0.262	1
CYBC1	0.273464	1.86981e-94	6.30388e-90	0.469	0.239	1
ORMDL3	0.289215	3.00713e-94	1.01382e-89	0.419	0.205	1
SH3BGRL3	0.296283	5.5096e-94	1.85751e-89	0.989	0.888	1
SRI	0.290992	1.37334e-93	4.63008e-89	0.575	0.322	1
NAMPT	0.359478	1.9409e-93	6.54355e-89	0.413	0.202	1
COMMD7	0.278235	5.45891e-93	1.84042e-88	0.474	0.243	1
HNRNPA3	0.301503	5.58569e-93	1.88316e-88	0.779	0.525	1
PSMB2	0.262517	6.34318e-93	2.13854e-88	0.509	0.265	1
SH3KBP1	0.282718	7.65323e-93	2.58021e-88	0.644	0.382	1
H1FX	0.36812	1.21413e-92	4.09331e-88	0.627	0.379	1
PRDX3	0.270697	1.24042e-91	4.18194e-87	0.341	0.149	1
RANBP1	0.294581	2.34479e-91	7.90521e-87	0.494	0.262	1
ABI3	0.305845	2.75174e-91	9.27723e-87	0.528	0.283	1
SEPTIN7	0.279288	4.41491e-91	1.48844e-86	0.864	0.625	1
SUMO2	0.269613	1.90447e-90	6.42072e-86	0.9	0.69	1
ARL6IP5	0.304958	2.03514e-90	6.86126e-86	0.829	0.591	1
TMBIM6	0.28841	3.27468e-90	1.10402e-85	0.84	0.608	1
COX5A	0.293131	6.80271e-90	2.29347e-85	0.673	0.413	1
MAN1A1	0.271792	8.17933e-90	2.75758e-85	0.291	0.119	1
EHBP1L1	0.278213	3.79696e-89	1.28011e-84	0.345	0.157	1
GBP2	0.327279	5.74721e-89	1.93761e-84	0.515	0.282	1
ARPC1B	0.300496	8.90285e-89	3.00151e-84	0.861	0.632	1
ITGB7	0.284596	1.81344e-88	6.11382e-84	0.569	0.325	1
RAC2	0.301568	3.22526e-88	1.08737e-83	0.91	0.721	1
CCL3L1	0.314532	5.18513e-88	1.74811e-83	0.433	0.207	1
CLTA	0.253221	7.27669e-88	2.45326e-83	0.518	0.278	1
BLOC1S1	0.292369	1.54858e-87	5.22087e-83	0.666	0.408	1
ARHGAP9	0.288048	2.04231e-87	6.88544e-83	0.674	0.431	1
DYNLL1	0.262962	2.55965e-87	8.62961e-83	0.749	0.487	1
BTG3	0.25757	2.56985e-87	8.664e-83	0.405	0.192	1
SNX10	0.2727	2.63991e-87	8.90019e-83	0.27	0.107	1
SLA	0.358788	2.86009e-87	9.64249e-83	0.568	0.33	1
CALR	0.381177	3.2134e-87	1.08337e-82	0.822	0.603	1
ARPC5L	0.288793	8.2679e-87	2.78744e-82	0.622	0.365	1
RNASEK	0.286842	1.53845e-86	5.18672e-82	0.863	0.631	1
PYCARD	0.282	1.73213e-86	5.8397e-82	0.459	0.237	1
WDR1	0.29713	3.01816e-85	1.01754e-80	0.671	0.421	1
GBP4	0.253293	1.53846e-84	5.18677e-80	0.382	0.18	1
SELENOH	0.293197	4.57065e-84	1.54095e-79	0.65	0.406	1
HDAC7	0.28223	5.05378e-84	1.70383e-79	0.31	0.138	1
IRF2	0.280459	3.25989e-83	1.09904e-78	0.463	0.247	1
N4BP1	0.252119	7.3422e-83	2.47535e-78	0.452	0.236	1
STK17B	0.298457	8.71314e-83	2.93755e-78	0.827	0.591	1
MTHFD2	0.278197	3.6933e-82	1.24516e-77	0.324	0.145	1
ITGB1	0.252205	2.3161e-81	7.80852e-77	0.583	0.325	1
ARPC4	0.258884	4.94726e-81	1.66792e-76	0.671	0.425	1
PTPN22	0.264104	1.39007e-80	4.68648e-76	0.557	0.317	1
AIP	0.253664	2.07329e-80	6.9899e-76	0.553	0.318	1
PSMB10	0.254119	7.17403e-80	2.41865e-75	0.724	0.465	1
SRSF9	0.256617	1.23436e-79	4.16153e-75	0.67	0.426	1
EZR	0.258773	5.51204e-79	1.85833e-74	0.811	0.574	1
EID1	0.277298	5.915e-79	1.99418e-74	0.718	0.472	1
RASGRP1	0.252779	1.74153e-78	5.8714e-74	0.506	0.283	1
UBALD2	0.277627	6.8142e-77	2.29734e-72	0.626	0.387	1
DOK2	0.260911	8.72262e-77	2.94074e-72	0.576	0.333	1
CLEC2B	0.411552	1.85839e-76	6.26539e-72	0.739	0.512	1
ZBTB38	0.285958	1.88048e-76	6.33985e-72	0.481	0.27	1
TSPO	0.264449	2.55329e-76	8.60816e-72	0.665	0.424	1
SDF2L1	0.278076	4.09138e-76	1.37937e-71	0.442	0.234	1
GZMA	0.338925	5.48756e-76	1.85008e-71	0.934	0.717	1
FAM89B	0.262542	7.55309e-76	2.54645e-71	0.334	0.159	1
CD164	0.257375	2.29885e-75	7.75034e-71	0.637	0.396	1
PSMA2	0.250628	3.64706e-75	1.22957e-70	0.62	0.381	1
CYCS	0.313237	2.25274e-74	7.59489e-70	0.717	0.497	1
C17orf49	0.258721	2.67106e-74	9.00521e-70	0.52	0.298	1
SRP14	0.250105	3.13671e-74	1.05751e-69	0.927	0.765	1
CTSW	0.339103	3.25646e-74	1.09788e-69	0.847	0.662	1
SH3BP1	0.253012	7.26301e-74	2.44865e-69	0.491	0.281	1
G3BP2	0.272346	1.35827e-73	4.57929e-69	0.656	0.42	1
ATF3	0.410294	3.19453e-73	1.077e-68	0.286	0.128	1
ADGRE5	0.262371	3.28385e-73	1.10712e-68	0.728	0.492	1
ETS1	0.281458	3.9241e-72	1.32297e-67	0.729	0.49	1
ATP5IF1	0.254824	6.78665e-70	2.28805e-65	0.71	0.472	1
ITGA4	0.281455	7.1836e-70	2.42188e-65	0.626	0.403	1
DENND2D	0.36985	6.52657e-69	2.20037e-64	0.517	0.327	1
MSN	0.265533	4.91073e-67	1.6556e-62	0.759	0.524	1
CORO1B	0.292451	1.20273e-66	4.05487e-62	0.433	0.243	1
HSP90AB1	0.274081	1.56415e-66	5.27339e-62	0.909	0.723	1
UCP2	0.280442	2.08922e-66	7.04358e-62	0.612	0.396	1
CLIC3	0.250793	1.85598e-65	6.25724e-61	0.422	0.227	1
CD96	0.256519	9.14991e-65	3.0848e-60	0.683	0.457	1
MIF	0.27003	1.71047e-64	5.76669e-60	0.917	0.756	1
SPN	0.262114	2.086e-64	7.03274e-60	0.566	0.357	1
PDIA3	0.252441	3.32101e-62	1.11964e-57	0.762	0.543	1
C9orf16	0.274959	5.16989e-62	1.74298e-57	0.7	0.484	1
PTPRCAP	0.263306	2.16498e-60	7.299e-56	0.428	0.249	1
RESF1	0.253369	2.40155e-60	8.09657e-56	0.656	0.442	1
PIM3	0.259241	2.10384e-58	7.0929e-54	0.474	0.278	1
ENO1	0.253253	2.01362e-53	6.78873e-49	0.762	0.558	1
CRTAM	0.371557	9.98904e-53	3.36771e-48	0.343	0.191	1
IFITM1	0.335192	5.82042e-51	1.9623e-46	0.792	0.638	1
HSP90AA1	0.327025	3.6952e-50	1.2458e-45	0.939	0.814	1
LINC01871	0.270822	4.36537e-41	1.47174e-36	0.341	0.204	1
ALOX5AP	0.367661	6.95356e-33	2.34432e-28	0.584	0.465	1
CAPG	0.250945	1.87363e-24	6.31677e-20	0.27	0.175	1
TNFSF9	0.945002	6.46353e-219	2.17911e-214	0.535	0.19	2
GZMK	0.56575	1.4461e-188	4.87538e-184	0.871	0.464	2
DUSP2	0.626526	1.81459e-174	6.11772e-170	0.932	0.713	2
UBE2S	0.56935	9.77212e-163	3.29457e-158	0.737	0.402	2
CD74	0.530319	1.57445e-147	5.3081e-143	0.973	0.839	2
CD81	0.487235	2.03865e-137	6.87311e-133	0.79	0.492	2
CXCR4	0.489622	2.11356e-137	7.12567e-133	0.961	0.81	2
TUBA4A	0.620015	1.07824e-133	3.63518e-129	0.811	0.535	2
HLA-DRB5	0.578549	5.48159e-133	1.84806e-128	0.627	0.315	2
ITM2C	0.64366	3.57275e-124	1.20452e-119	0.601	0.321	2
TENT5C	0.479824	4.31808e-123	1.4558e-118	0.656	0.353	2
COTL1	0.463462	5.63471e-120	1.89969e-115	0.873	0.629	2
NR4A2	0.5012	1.89173e-117	6.37778e-113	0.862	0.585	2
HSPA8	0.398174	8.63224e-112	2.91027e-107	0.977	0.811	2
ENC1	0.345772	1.18251e-105	3.9867e-101	0.262	0.081	2
SERTAD1	0.461045	2.92883e-103	9.87425e-99	0.599	0.322	2
DNAJB1	0.515998	2.10503e-102	7.09691e-98	0.895	0.65	2
DUSP4	0.538023	4.70521e-102	1.58631e-97	0.643	0.357	2
JUND	0.465594	1.43901e-101	4.85147e-97	0.892	0.673	2
YPEL5	0.401626	8.378e-100	2.82456e-95	0.836	0.558	2
SRSF7	0.397102	3.66838e-98	1.23676e-93	0.934	0.765	2
TNFAIP3	0.363275	6.92895e-96	2.33603e-91	0.91	0.688	2
TNF	0.662212	2.63079e-95	8.86944e-91	0.355	0.145	2
RGCC	0.49059	6.60365e-95	2.22636e-90	0.768	0.503	2
UBC	0.293645	2.23794e-94	7.545e-90	0.995	0.9	2
TUBB4B	0.427921	4.85496e-93	1.6368e-88	0.656	0.392	2
NR4A3	0.470953	2.91172e-92	9.81658e-88	0.438	0.207	2
DUSP1	0.42964	1.03844e-91	3.50098e-87	0.915	0.681	2
LDHA	0.410297	3.06618e-88	1.03373e-83	0.877	0.677	2
MYADM	0.408122	9.76016e-87	3.29054e-82	0.686	0.417	2
AOAH	0.311921	8.2123e-86	2.7687e-81	0.433	0.203	2
NFATC2	0.352526	2.64096e-85	8.90372e-81	0.556	0.312	2
HNRNPLL	0.353488	2.84666e-85	9.59723e-81	0.439	0.214	2
ZNF331	0.473261	3.16429e-82	1.06681e-77	0.626	0.38	2
ZFP36	0.398302	6.50527e-82	2.19319e-77	0.944	0.742	2
CCL4L2	1.1048	2.03065e-81	6.84614e-77	0.647	0.396	2
CCL4	0.764802	3.39136e-80	1.14336e-75	0.834	0.607	2
AHNAK	0.346176	6.11973e-78	2.0632e-73	0.731	0.479	2
TAGAP	0.44295	1.45185e-76	4.89475e-72	0.61	0.377	2
PMEPA1	0.370508	1.94081e-76	6.54325e-72	0.353	0.163	2
IFNG	0.498918	2.43729e-76	8.21709e-72	0.573	0.324	2
CD8A	0.310795	2.59148e-76	8.73691e-72	0.88	0.698	2
BRD2	0.339206	1.03605e-74	3.49292e-70	0.76	0.529	2
DNAJA1	0.406633	2.12248e-74	7.15574e-70	0.818	0.583	2
PDE4B	0.353068	2.05524e-73	6.92905e-69	0.512	0.287	2
TGFB1	0.347525	3.662e-73	1.23461e-68	0.759	0.526	2
FOSB	0.36664	7.99807e-73	2.69647e-68	0.706	0.446	2
SRGN	0.271726	5.67028e-71	1.91168e-66	0.979	0.848	2
RNF19A	0.299647	1.08748e-69	3.66634e-65	0.601	0.355	2
RBM38	0.371548	1.15318e-69	3.88783e-65	0.603	0.382	2
CITED2	0.426108	3.16536e-69	1.06717e-64	0.613	0.39	2
ALDOA	0.361926	3.41318e-69	1.15072e-64	0.568	0.353	2
SH2D1A	0.313421	1.15614e-68	3.89779e-64	0.525	0.3	2
CD5	0.346921	1.66143e-68	5.60134e-64	0.451	0.25	2
FOS	0.354686	1.23575e-67	4.1662e-63	0.836	0.578	2
JMJD6	0.319337	9.87536e-66	3.32938e-61	0.527	0.305	2
CST7	0.261072	1.29142e-65	4.35391e-61	0.953	0.732	2
NEU1	0.423541	1.43032e-65	4.82218e-61	0.455	0.254	2
EZR	0.319359	2.85557e-65	9.62728e-61	0.806	0.583	2
PNRC1	0.296658	4.58301e-65	1.54512e-60	0.933	0.764	2
HLA-DPA1	0.290898	1.2843e-64	4.3299e-60	0.851	0.597	2
H2AFX	0.341882	1.31283e-64	4.42607e-60	0.428	0.235	2
CD44	0.2837	2.87593e-64	9.69591e-60	0.834	0.629	2
CSRNP1	0.349592	4.69983e-64	1.5845e-59	0.618	0.388	2
METRNL	0.382775	1.7836e-63	6.01322e-59	0.505	0.291	2
PPP1R15A	0.298125	1.98081e-62	6.67809e-58	0.797	0.542	2
MIDN	0.324398	2.24878e-62	7.58155e-58	0.565	0.35	2
IER2	0.340685	2.70831e-62	9.13081e-58	0.849	0.637	2
CRTAM	0.344255	6.72872e-61	2.26852e-56	0.375	0.192	2
YWHAZ	0.268153	7.81587e-61	2.63504e-56	0.898	0.726	2
SMAD7	0.29699	7.46029e-60	2.51516e-55	0.538	0.325	2
LCP1	0.281172	1.25914e-59	4.24506e-55	0.827	0.626	2
STK17B	0.269186	2.03367e-59	6.85633e-55	0.819	0.6	2
SLC1A5	0.279765	2.5279e-59	8.52255e-55	0.304	0.144	2
JUNB	0.297096	2.54772e-59	8.5894e-55	0.952	0.793	2
VIM	0.308543	2.85621e-59	9.62942e-55	0.947	0.818	2
MYH9	0.297363	3.52448e-59	1.18824e-54	0.778	0.567	2
GLCCI1	0.261645	9.12915e-58	3.0778e-53	0.408	0.224	2
SOCS1	0.331199	4.73099e-57	1.59501e-52	0.494	0.297	2
CXCR3	0.270597	6.38645e-56	2.15313e-51	0.566	0.345	2
IFRD1	0.316161	7.75981e-56	2.61614e-51	0.538	0.338	2
ZYX	0.300451	1.58586e-55	5.34656e-51	0.617	0.407	2
HLA-DRB1	0.276761	7.35229e-54	2.47875e-49	0.84	0.592	2
PPP1R14B	0.464173	7.85269e-54	2.64745e-49	0.371	0.206	2
HSPA5	0.27469	1.30618e-53	4.40364e-49	0.782	0.566	2
CNN2	0.289523	3.50575e-53	1.18193e-48	0.705	0.495	2
GNG2	0.259365	6.18519e-52	2.08527e-47	0.642	0.424	2
GNAI2	0.261946	7.06128e-51	2.38064e-46	0.729	0.522	2
JUN	0.381734	7.66485e-51	2.58413e-46	0.916	0.737	2
PIK3R1	0.308824	1.01507e-49	3.42221e-45	0.611	0.416	2
KLF6	0.28983	3.17889e-49	1.07173e-44	0.893	0.748	2
HSP90AB1	0.287684	5.83849e-49	1.96839e-44	0.919	0.728	2
FABP5	0.308974	8.35675e-49	2.81739e-44	0.464	0.273	2
CD6	0.256048	9.62343e-49	3.24444e-44	0.594	0.405	2
CALR	0.25648	1.65725e-48	5.58725e-44	0.816	0.612	2
SELPLG	0.26312	2.62638e-48	8.85458e-44	0.56	0.369	2
THEMIS	0.254716	6.24017e-48	2.10381e-43	0.513	0.327	2
PTPRCAP	0.250002	3.51202e-46	1.18404e-41	0.425	0.257	2
CD69	0.290492	2.48514e-45	8.37841e-41	0.856	0.671	2
EIF4A3	0.261538	1.32573e-43	4.46956e-39	0.474	0.302	2
GTF2B	0.254538	3.27842e-43	1.10529e-38	0.425	0.259	2
KPNA2	0.258037	5.44291e-43	1.83502e-38	0.357	0.202	2
RESF1	0.250894	9.79804e-43	3.30331e-38	0.638	0.452	2
RILPL2	0.253405	3.30548e-42	1.11441e-37	0.316	0.171	2
GLIPR2	0.258855	2.33883e-41	7.88515e-37	0.41	0.252	2
TUBA1C	0.25138	3.34404e-41	1.12741e-36	0.335	0.191	2
VPS37B	0.255753	7.86146e-41	2.65041e-36	0.482	0.309	2
ZFP36L1	0.284898	7.78204e-40	2.62364e-35	0.762	0.566	2
CKS2	0.252452	1.30434e-38	4.39745e-34	0.327	0.188	2
MARCKSL1	0.279618	4.26116e-38	1.43661e-33	0.342	0.202	2
ATF3	0.298644	1.07721e-37	3.6317e-33	0.262	0.137	2
DDIT4	0.277593	6.76179e-37	2.27967e-32	0.645	0.467	2
HSP90AA1	0.257995	1.74495e-34	5.88293e-30	0.938	0.819	2
DNAAF2	0.252689	2.15942e-33	7.28026e-29	0.308	0.183	2
EGR1	0.288507	1.26532e-27	4.26589e-23	0.312	0.191	2
HSPA1B	0.460895	2.05518e-23	6.92883e-19	0.47	0.341	2
XCL2	0.271611	7.08854e-17	2.38983e-12	0.275	0.181	2
TYROBP	2.1013	0	0	0.709	0.061	3
TRDC	1.52522	0	0	0.5	0.038	3
FCGR3A	1.31727	0	0	0.463	0.059	3
KLRD1	1.1608	0	0	0.814	0.264	3
KLRC3	0.999011	0	0	0.403	0.063	3
KLRF1	0.96257	0	0	0.319	0.022	3
KIR2DL3	0.822184	0	0	0.276	0.011	3
GNLY	1.46013	5.36421e-308	1.80849e-303	0.68	0.243	3
NKG7	0.82496	2.91797e-276	9.83764e-272	0.986	0.807	3
FCER1G	0.954984	8.29017e-228	2.79495e-223	0.254	0.038	3
HOPX	0.850861	2.83018e-214	9.54166e-210	0.665	0.282	3
KLRC2	1.01569	1.39637e-205	4.70772e-201	0.425	0.126	3
KLRB1	0.882663	1.09786e-190	3.70134e-186	0.469	0.144	3
FGFBP2	1.06163	4.9173e-183	1.65782e-178	0.39	0.109	3
FCRL6	0.678178	3.55826e-182	1.19963e-177	0.422	0.128	3
S1PR5	0.609247	3.11653e-163	1.05071e-158	0.294	0.069	3
CMC1	1.03537	2.67211e-160	9.00875e-156	0.644	0.342	3
IFITM2	0.622105	2.19851e-145	7.41205e-141	0.885	0.714	3
FGR	0.494896	7.35365e-141	2.47921e-136	0.271	0.067	3
SYNGR1	0.576426	3.13851e-126	1.05812e-121	0.261	0.069	3
MATK	0.581247	4.3134e-108	1.45422e-103	0.528	0.27	3
CTSW	0.508888	1.06716e-104	3.59782e-100	0.853	0.672	3
XCL2	0.749281	1.74869e-103	5.89554e-99	0.406	0.169	3
TTC38	0.500288	1.24711e-95	4.20452e-91	0.263	0.086	3
CD63	0.493201	2.26555e-88	7.63806e-84	0.723	0.494	3
PRF1	0.609148	1.00376e-87	3.38409e-83	0.719	0.513	3
CST7	0.415374	1.03684e-82	3.4956e-78	0.924	0.74	3
GZMH	0.528851	3.43635e-81	1.15853e-76	0.754	0.521	3
TMSB4X	0.264399	2.65964e-80	8.96672e-76	1	0.972	3
PLAC8	0.56845	5.64266e-79	1.90237e-74	0.332	0.143	3
GZMB	0.461541	4.67294e-77	1.57543e-72	0.715	0.465	3
RPL21	0.314007	9.84041e-70	3.3176e-65	0.992	0.94	3
HCST	0.345629	3.87455e-69	1.30627e-64	0.918	0.826	3
CYBA	0.309598	3.62517e-60	1.22219e-55	0.938	0.865	3
AOAH	0.38526	4.45859e-60	1.50317e-55	0.399	0.211	3
RPL27A	0.441785	9.0899e-58	3.06457e-53	0.949	0.876	3
RPS17	0.498719	1.20381e-57	4.05851e-53	0.848	0.745	3
XCL1	0.602186	3.82525e-56	1.28965e-51	0.265	0.116	3
CCL5	0.28662	9.65366e-56	3.25464e-51	0.991	0.866	3
PLEK	0.495055	1.04013e-54	3.50669e-50	0.349	0.185	3
ZEB2	0.42419	1.27699e-52	4.30525e-48	0.473	0.294	3
RPS11	0.40081	9.2904e-51	3.13217e-46	0.927	0.858	3
CLIC3	0.560338	1.53967e-49	5.19084e-45	0.401	0.24	3
RPL31	0.317934	1.33808e-43	4.51121e-39	0.936	0.872	3
LGALS1	0.461905	2.98287e-42	1.00564e-37	0.617	0.453	3
ID2	0.37378	3.30056e-42	1.11275e-37	0.693	0.55	3
GSTP1	0.355771	3.61281e-42	1.21802e-37	0.683	0.564	3
TBX21	0.361561	6.42062e-42	2.16465e-37	0.322	0.178	3
RPS29	0.31366	3.15586e-41	1.06397e-36	0.965	0.913	3
LITAF	0.359022	4.34607e-41	1.46523e-36	0.687	0.58	3
TXNIP	0.43691	2.69259e-40	9.0778e-36	0.663	0.545	3
MYO1F	0.343989	6.06972e-40	2.04634e-35	0.483	0.325	3
ITGB2	0.328084	2.60626e-39	8.78675e-35	0.746	0.653	3
CD247	0.468052	2.14064e-37	7.21694e-33	0.584	0.495	3
RPL7	0.294834	5.83116e-37	1.96592e-32	0.914	0.852	3
RPS20	0.403955	1.8643e-36	6.28529e-32	0.837	0.792	3
GZMM	0.307405	3.21068e-35	1.08245e-30	0.682	0.575	3
RPS10	0.353765	7.41019e-33	2.49827e-28	0.649	0.521	3
C12orf75	0.311684	1.01514e-32	3.42244e-28	0.527	0.384	3
EFHD2	0.484143	1.54504e-32	5.20895e-28	0.504	0.411	3
RPL23	0.336205	1.56304e-32	5.26963e-28	0.836	0.77	3
IL2RB	0.338432	4.82828e-28	1.62781e-23	0.517	0.4	3
APMAP	0.314813	1.182e-26	3.985e-22	0.464	0.353	3
RHOC	0.291385	4.34664e-26	1.46543e-21	0.429	0.305	3
ADAM8	0.272537	1.60865e-25	5.42339e-21	0.323	0.213	3
PYHIN1	0.266481	2.28221e-25	7.69423e-21	0.378	0.254	3
AC004687.1	0.257108	5.09881e-25	1.71901e-20	0.321	0.206	3
TRG-AS1	0.33562	2.91941e-24	9.84249e-20	0.324	0.217	3
BIN2	0.321537	3.06125e-24	1.03207e-19	0.492	0.402	3
ADGRG1	0.256118	3.41405e-24	1.15101e-19	0.275	0.166	3
RPL13A	0.331915	4.23374e-24	1.42736e-19	0.939	0.91	3
NEAT1	0.256874	1.83258e-23	6.17837e-19	0.696	0.607	3
LINC01871	0.304738	2.27363e-23	7.66532e-19	0.324	0.214	3
MBP	0.274968	3.61522e-23	1.21883e-18	0.473	0.366	3
CDKN2D	0.260157	1.88929e-20	6.36955e-16	0.275	0.182	3
NDUFB7	0.297052	3.10321e-20	1.04622e-15	0.443	0.357	3
ARPC5L	0.261887	1.87457e-18	6.31991e-14	0.484	0.394	3
DSTN	0.291432	3.17378e-18	1.07001e-13	0.329	0.239	3
PRELID1	0.26356	2.6751e-17	9.01882e-13	0.502	0.428	3
IFITM3	0.325768	4.40969e-17	1.48668e-12	0.433	0.361	3
PRDX5	0.256329	6.24456e-17	2.10529e-12	0.51	0.439	3
HMGB2	0.253188	1.19808e-13	4.03921e-09	0.512	0.444	3
CCL3	0.394949	1.76064e-11	5.93582e-07	0.336	0.25	3
TRGC2	0.271708	4.75025e-11	1.6015e-06	0.274	0.2	3
KLF2	1.35989	0	0	0.873	0.327	4
LEF1	1.214	0	0	0.752	0.072	4
SELL	1.19868	0	0	0.741	0.111	4
IL7R	1.17832	0	0	0.921	0.249	4
TCF7	1.15113	0	0	0.86	0.203	4
CCR7	1.07275	0	0	0.772	0.096	4
PABPC1	0.830877	0	0	0.987	0.79	4
LTB	0.813975	0	0	0.891	0.346	4
CD55	0.797529	0	0	0.75	0.23	4
EEF1B2	0.794407	0	0	0.977	0.798	4
ACTN1	0.785519	0	0	0.496	0.03	4
RPS8	0.776076	0	0	0.997	0.945	4
RPS13	0.755788	0	0	0.997	0.925	4
RPS5	0.714316	0	0	0.991	0.904	4
RPLP0	0.713308	0	0	0.997	0.902	4
RPS12	0.694054	0	0	0.997	0.961	4
EEF1A1	0.692548	0	0	0.999	0.973	4
RPL32	0.69116	0	0	0.998	0.953	4
NELL2	0.690419	0	0	0.698	0.178	4
PASK	0.63332	0	0	0.425	0.051	4
RPS28	0.629682	0	0	0.996	0.939	4
RPS3A	0.626633	0	0	0.996	0.942	4
RPS21	0.625621	0	0	0.989	0.898	4
MAL	0.616435	0	0	0.446	0.026	4
TPT1	0.616079	0	0	0.997	0.951	4
RPL29	0.601011	0	0	0.996	0.928	4
RPL30	0.599784	0	0	0.999	0.952	4
RPS23	0.591347	0	0	0.997	0.943	4
BACH2	0.582946	0	0	0.471	0.053	4
RPL39	0.579458	0	0	0.997	0.939	4
RPL11	0.57535	0	0	0.998	0.95	4
MYC	0.570396	0	0	0.388	0.056	4
RPL34	0.569345	0	0	0.997	0.947	4
ARMH1	0.540062	0	0	0.398	0.045	4
TRABD2A	0.535879	0	0	0.422	0.033	4
RPL19	0.530029	0	0	0.997	0.95	4
IRS2	0.512276	0	0	0.402	0.044	4
CD248	0.470594	0	0	0.292	0.015	4
SCML1	0.323432	0	0	0.253	0.018	4
RPL18	0.536445	1.33149e-305	4.48899e-301	0.997	0.933	4
RASGRP2	0.536636	1.32019e-301	4.45089e-297	0.589	0.136	4
FOS	1.06685	2.14022e-301	7.21555e-297	0.964	0.574	4
RPL37	0.613023	3.62892e-297	1.22345e-292	0.993	0.926	4
RPL5	0.646217	1.71896e-295	5.79532e-291	0.993	0.899	4
RPL13	0.496303	3.30115e-293	1.11295e-288	0.998	0.968	4
LDLRAP1	0.487354	2.29296e-285	7.73049e-281	0.473	0.094	4
SATB1	0.52261	1.40223e-283	4.72748e-279	0.576	0.135	4
FAM117B	0.348787	2.81292e-283	9.48349e-279	0.316	0.041	4
TMEM123	0.655903	5.0178e-283	1.6917e-278	0.74	0.237	4
RPL18A	0.502391	1.98068e-281	6.67767e-277	0.997	0.948	4
LDHB	0.771205	3.19578e-280	1.07743e-275	0.926	0.578	4
RPL22	0.660055	1.8799e-275	6.33789e-271	0.979	0.844	4
JUNB	0.955851	1.22385e-273	4.1261e-269	0.987	0.795	4
RPL14	0.512833	7.19728e-273	2.42649e-268	0.995	0.93	4
ZBTB10	0.373988	8.50805e-271	2.86841e-266	0.303	0.039	4
NOSIP	0.766429	1.92806e-270	6.50027e-266	0.745	0.272	4
ABLIM1	0.619367	2.20186e-269	7.42334e-265	0.603	0.165	4
RPL35A	0.49118	5.84201e-262	1.96957e-257	0.997	0.934	4
ITGA6	0.360178	3.00819e-257	1.01418e-252	0.328	0.049	4
EEF2	0.665594	6.74165e-256	2.27288e-251	0.976	0.788	4
RPS14	0.453564	9.22326e-249	3.10953e-244	0.997	0.952	4
RPL8	0.466725	1.81849e-240	6.13086e-236	0.996	0.935	4
S1PR1	0.47442	3.03036e-239	1.02166e-234	0.499	0.118	4
RPS4X	0.47367	3.93762e-238	1.32753e-233	0.998	0.939	4
AIF1	0.431589	1.78298e-237	6.01114e-233	0.428	0.089	4
LSR	0.38165	3.66479e-236	1.23555e-231	0.384	0.074	4
RPL41	0.360205	4.6504e-232	1.56784e-227	0.997	0.971	4
AL138963.4	0.952552	1.03883e-231	3.50233e-227	0.68	0.256	4
RPL36	0.469526	1.03938e-231	3.50415e-227	0.995	0.92	4
RPL7A	0.445317	6.74887e-231	2.27531e-226	0.997	0.932	4
FOSB	0.756816	3.64236e-229	1.22798e-224	0.89	0.437	4
RPL12	0.444435	9.36087e-228	3.15592e-223	0.997	0.938	4
RPS27A	0.395716	9.51366e-228	3.20744e-223	0.997	0.955	4
RPL4	0.596839	1.44267e-227	4.86383e-223	0.979	0.833	4
RPL10	0.40255	3.83756e-227	1.2938e-222	0.998	0.973	4
SERINC5	0.344343	1.12019e-224	3.7766e-220	0.375	0.072	4
AC119396.1	0.325745	1.64629e-224	5.55032e-220	0.321	0.054	4
BEX2	0.327176	4.70211e-223	1.58527e-218	0.343	0.061	4
C1orf162	0.341807	1.52625e-219	5.14561e-215	0.345	0.062	4
CITED4	0.316487	3.58031e-218	1.20706e-213	0.253	0.034	4
RPLP1	0.390876	8.49266e-218	2.86321e-213	0.999	0.972	4
CAMK4	0.49785	7.52705e-217	2.53767e-212	0.676	0.222	4
RACK1	0.471595	3.51157e-215	1.18389e-210	0.991	0.901	4
RPS15	0.368122	3.10164e-207	1.04569e-202	0.998	0.956	4
MAML2	0.417065	1.25945e-206	4.2461e-202	0.472	0.122	4
SPINT2	0.297392	2.2089e-206	7.4471e-202	0.344	0.065	4
RPS3	0.374082	1.05638e-203	3.56146e-199	0.999	0.954	4
RPS6	0.486083	1.8745e-203	6.31968e-199	0.997	0.945	4
RPS18	0.439434	4.23627e-203	1.42822e-198	0.997	0.958	4
RPSA	0.495542	2.71083e-202	9.13928e-198	0.988	0.893	4
TXK	0.320465	2.4286e-199	8.18777e-195	0.355	0.072	4
RPS25	0.373232	3.59839e-199	1.21316e-194	0.997	0.944	4
AREG	0.574076	5.72465e-196	1.93001e-191	0.471	0.127	4
NACA	0.484061	9.7395e-196	3.28357e-191	0.984	0.886	4
LINC02446	0.724581	3.27282e-194	1.1034e-189	0.597	0.206	4
FCMR	0.519354	2.44162e-191	8.23167e-187	0.704	0.265	4
FLT3LG	0.482384	2.73021e-191	9.20464e-187	0.634	0.218	4
RPL28	0.329184	1.5289e-187	5.15453e-183	0.999	0.964	4
NCK2	0.41476	2.89134e-184	9.74787e-180	0.584	0.191	4
PRKCQ-AS1	0.397377	1.14197e-181	3.85003e-177	0.515	0.152	4
RPS15A	0.329548	6.78125e-180	2.28623e-175	1	0.959	4
SOCS3	0.553816	4.07728e-178	1.37461e-173	0.564	0.191	4
THEM4	0.289193	2.47408e-174	8.3411e-170	0.357	0.081	4
FOXP1	0.44646	4.44227e-174	1.49767e-169	0.721	0.29	4
RIPOR2	0.456286	5.78405e-172	1.95003e-167	0.688	0.264	4
NR4A1	0.690265	3.61487e-171	1.21872e-166	0.56	0.195	4
NDFIP1	0.537288	5.11066e-170	1.72301e-165	0.759	0.347	4
PIK3IP1	0.455418	1.05268e-169	3.54899e-165	0.714	0.288	4
RPL3	0.413639	1.35619e-168	4.57224e-164	0.997	0.94	4
RCAN3	0.372874	7.03312e-168	2.37115e-163	0.588	0.197	4
HOOK2	0.359272	2.3623e-164	7.96426e-160	0.375	0.095	4
YBX3	0.49499	6.98991e-164	2.35658e-159	0.602	0.217	4
AQP3	0.359876	1.8862e-163	6.35913e-159	0.436	0.121	4
EEF1G	0.478664	6.13783e-163	2.06931e-158	0.972	0.82	4
DGKA	0.353166	1.08203e-160	3.64797e-156	0.524	0.171	4
NFKBIA	0.640274	1.17893e-160	3.97466e-156	0.901	0.567	4
SH3YL1	0.294233	1.38811e-159	4.67986e-155	0.279	0.056	4
TUBA1A	0.711264	7.01103e-159	2.3637e-154	0.839	0.494	4
SMAP2	0.466646	3.70849e-158	1.25028e-153	0.747	0.332	4
RPS9	0.391731	5.79064e-158	1.95226e-153	0.996	0.925	4
RETREG1	0.305974	1.00675e-157	3.39416e-153	0.355	0.087	4
KLF3	0.369947	4.73832e-157	1.59748e-152	0.488	0.148	4
SLC2A3	0.657652	3.43378e-155	1.15766e-150	0.824	0.453	4
ICAM2	0.310048	4.9733e-155	1.6767e-150	0.442	0.126	4
PPP1R15A	0.61017	5.77319e-155	1.94637e-150	0.888	0.541	4
RPL9	0.372904	6.16794e-155	2.07946e-150	0.995	0.924	4
CSRNP1	0.535115	1.69149e-154	5.7027e-150	0.791	0.379	4
RPL10A	0.39423	6.02756e-154	2.03213e-149	0.986	0.916	4
DUSP1	0.548619	1.84664e-151	6.22577e-147	0.958	0.684	4
JUN	0.69315	1.53846e-148	5.18678e-144	0.943	0.74	4
RPL6	0.35257	3.8705e-147	1.3049e-142	0.998	0.929	4
SORL1	0.318176	5.60248e-145	1.88882e-140	0.525	0.176	4
FXYD5	0.504562	6.76958e-145	2.2823e-140	0.939	0.657	4
EIF3L	0.474197	2.12694e-143	7.17078e-139	0.799	0.402	4
TOB1	0.517054	1.23431e-142	4.16137e-138	0.69	0.306	4
DNAJB1	0.691395	4.6386e-141	1.56386e-136	0.943	0.653	4
RPS7	0.31772	9.55755e-141	3.22223e-136	0.995	0.941	4
NPM1	0.442039	3.06591e-139	1.03364e-134	0.97	0.8	4
NFKB1	0.397845	1.71045e-137	5.76662e-133	0.642	0.265	4
ZNF10	0.258419	2.58383e-137	8.71113e-133	0.32	0.081	4
TSC22D3	0.534576	5.17794e-135	1.74569e-130	0.962	0.725	4
HIST1H4C	0.455244	1.35799e-133	4.57834e-129	0.753	0.363	4
IL6ST	0.286137	1.08866e-132	3.6703e-128	0.407	0.124	4
MCUB	0.320806	1.28007e-132	4.31563e-128	0.608	0.229	4
PDE3B	0.310878	3.73886e-131	1.26052e-126	0.614	0.242	4
GAS5	0.457944	8.74328e-131	2.94771e-126	0.897	0.601	4
RPS4Y1	0.511445	2.00029e-130	6.74378e-126	0.874	0.65	4
JUND	0.56857	6.12363e-130	2.06452e-125	0.922	0.677	4
FKBP5	0.32317	1.90982e-129	6.43876e-125	0.497	0.173	4
EIF2S3	0.361213	8.2818e-129	2.79213e-124	0.638	0.263	4
RASA3	0.312167	1.20188e-128	4.05201e-124	0.462	0.155	4
SNHG29	0.449049	5.11206e-126	1.72348e-121	0.921	0.641	4
BTG2	0.558396	5.31849e-126	1.79308e-121	0.856	0.526	4
ESYT2	0.306659	1.04117e-125	3.5102e-121	0.465	0.16	4
IMPDH2	0.310791	8.61981e-125	2.90608e-120	0.414	0.133	4
APEX1	0.319839	2.57977e-123	8.69743e-119	0.532	0.199	4
RGS10	0.447344	1.20326e-122	4.05667e-118	0.76	0.388	4
TESPA1	0.294432	1.89445e-120	6.38694e-116	0.377	0.116	4
RSL1D1	0.384016	3.94625e-120	1.33044e-115	0.725	0.347	4
RPS2	0.3282	3.21239e-119	1.08303e-114	0.996	0.954	4
RPL36A	0.353763	3.26005e-118	1.09909e-113	0.986	0.88	4
ARRDC2	0.31901	9.51415e-118	3.2076e-113	0.433	0.148	4
SARAF	0.380084	5.45201e-117	1.83809e-112	0.981	0.824	4
PIM2	0.378937	9.37342e-117	3.16015e-112	0.51	0.196	4
SGK1	0.300058	9.87242e-117	3.32839e-112	0.318	0.09	4
RPL26	0.271711	2.59167e-116	8.73756e-112	0.997	0.948	4
EGR1	0.609953	4.67583e-116	1.57641e-111	0.467	0.18	4
FAU	0.266069	4.77177e-115	1.60876e-110	0.995	0.939	4
RNF138	0.295604	3.42656e-111	1.15523e-106	0.482	0.179	4
ZFP36	0.505661	4.69093e-111	1.5815e-106	0.97	0.746	4
ATM	0.328838	5.21495e-110	1.75817e-105	0.649	0.292	4
EIF4B	0.40996	5.43203e-108	1.83135e-103	0.794	0.448	4
ALKBH7	0.297753	1.4092e-107	4.75097e-103	0.554	0.225	4
TMEM243	0.297424	1.13261e-106	3.81847e-102	0.572	0.24	4
TSPYL1	0.326816	1.9492e-106	6.57154e-102	0.574	0.243	4
RPS24	0.273018	8.74934e-106	2.94975e-101	0.997	0.937	4
PABPC4	0.271498	1.99612e-105	6.7297e-101	0.452	0.166	4
RPL24	0.277267	3.82806e-105	1.29059e-100	0.996	0.91	4
MGAT4A	0.290455	4.68168e-104	1.57838e-99	0.616	0.264	4
EIF3E	0.375232	2.02161e-101	6.81565e-97	0.846	0.529	4
CCND3	0.371696	5.48109e-100	1.8479e-95	0.798	0.429	4
SMDT1	0.341715	8.47024e-99	2.85566e-94	0.767	0.409	4
ITPKB	0.262333	6.20783e-97	2.09291e-92	0.407	0.149	4
OXNAD1	0.263057	6.35267e-97	2.14174e-92	0.542	0.224	4
HSP90AB1	0.426303	8.04009e-97	2.71063e-92	0.957	0.731	4
RPS16	0.286454	3.74149e-95	1.26141e-90	0.995	0.928	4
SNHG1	0.276451	4.18708e-95	1.41163e-90	0.535	0.228	4
NSMCE3	0.346406	3.75659e-94	1.2665e-89	0.636	0.304	4
PER1	0.26974	3.22021e-93	1.08566e-88	0.486	0.197	4
SNHG8	0.346646	9.78532e-93	3.29902e-88	0.747	0.398	4
SF1	0.356069	9.392e-92	3.16642e-87	0.885	0.616	4
PNRC1	0.359951	2.3595e-90	7.95483e-86	0.957	0.767	4
TUBB2A	0.281982	6.43421e-90	2.16923e-85	0.329	0.111	4
FBL	0.285784	1.88159e-89	6.34358e-85	0.634	0.297	4
ST13	0.307349	7.7425e-89	2.61031e-84	0.713	0.366	4
ARL4A	0.283547	1.24012e-88	4.18093e-84	0.515	0.219	4
MYADM	0.320087	2.84843e-84	9.60319e-80	0.772	0.418	4
CDC25B	0.25177	5.68092e-84	1.91526e-79	0.482	0.202	4
NSA2	0.298954	1.27455e-81	4.29701e-77	0.653	0.331	4
HSPD1	0.292472	1.49492e-81	5.03997e-77	0.705	0.373	4
IRF2BP2	0.267992	6.28083e-81	2.11752e-76	0.508	0.225	4
TLE5	0.343671	1.07305e-80	3.61769e-76	0.872	0.595	4
PTGER4	0.357713	1.81671e-80	6.12484e-76	0.707	0.38	4
UXT	0.296152	2.05959e-80	6.94369e-76	0.81	0.465	4
NFKBIZ	0.255262	8.07506e-80	2.72243e-75	0.59	0.287	4
MT-ND4L	0.293188	1.19227e-79	4.01963e-75	0.883	0.633	4
BTF3	0.275966	3.61631e-78	1.2192e-73	0.975	0.833	4
GADD45B	0.365005	4.63129e-78	1.56139e-73	0.764	0.431	4
PCBP2	0.30819	2.06077e-76	6.94767e-72	0.828	0.513	4
RGCC	0.373756	4.52918e-76	1.52697e-71	0.833	0.505	4
ANP32B	0.287386	4.91643e-74	1.65753e-69	0.78	0.441	4
EIF3H	0.315059	1.49493e-73	5.04e-69	0.829	0.543	4
FAM107B	0.252359	2.52601e-73	8.51617e-69	0.694	0.36	4
SBDS	0.287328	1.55895e-71	5.25585e-67	0.692	0.372	4
C12orf57	0.334931	2.34121e-71	7.89314e-67	0.86	0.572	4
LINC01578	0.319944	4.16809e-71	1.40523e-66	0.809	0.501	4
IER5	0.289641	1.19055e-70	4.01384e-66	0.583	0.291	4
SOCS1	0.256449	2.21123e-68	7.45495e-64	0.593	0.294	4
YPEL5	0.358007	2.7361e-65	9.22449e-61	0.838	0.566	4
HSPA8	0.323103	1.19463e-64	4.02757e-60	0.978	0.816	4
EIF3F	0.263175	2.90588e-62	9.79687e-58	0.875	0.592	4
HNRNPA0	0.256142	1.13262e-59	3.81852e-55	0.856	0.556	4
SNHG6	0.257348	1.0771e-58	3.63134e-54	0.824	0.522	4
CD69	0.298552	4.34568e-55	1.4651e-50	0.899	0.673	4
ZFP36L2	0.274647	4.22981e-49	1.42604e-44	0.98	0.821	4
IER2	0.304435	4.51571e-45	1.52243e-40	0.887	0.64	4
RPS14	0.494126	8.78509e-195	2.9618e-190	0.996	0.953	5
RPL13	0.478978	6.93614e-194	2.33845e-189	0.998	0.968	5
RPL34	0.582534	4.26987e-190	1.43954e-185	0.999	0.948	5
RPS18	0.523389	4.45413e-186	1.50166e-181	0.996	0.959	5
RPS6	0.595217	1.83838e-184	6.19793e-180	0.988	0.947	5
IL7R	0.897225	4.94977e-183	1.66877e-178	0.707	0.276	5
RPLP2	0.617315	8.63752e-182	2.91205e-177	0.991	0.944	5
RPL32	0.535606	1.01029e-181	3.40609e-177	0.996	0.954	5
RPS27A	0.418434	1.41818e-174	4.78127e-170	0.999	0.955	5
RPL11	0.473867	6.46562e-172	2.17982e-167	0.991	0.951	5
RPL9	0.570757	5.85062e-165	1.97248e-160	0.982	0.926	5
RPL10	0.40498	7.60444e-164	2.56376e-159	1	0.974	5
RPL3	0.521388	6.04484e-155	2.03796e-150	0.981	0.943	5
RPL10A	0.53286	1.84678e-154	6.22623e-150	0.984	0.918	5
RPL21	0.619474	8.79499e-154	2.96514e-149	0.986	0.942	5
RPS25	0.437133	2.62073e-153	8.83553e-149	0.993	0.946	5
RPS3	0.404676	3.07471e-152	1.03661e-147	0.996	0.955	5
RPL19	0.421714	1.1453e-149	3.86128e-145	0.995	0.951	5
RPS3A	0.481948	1.17587e-148	3.96434e-144	0.991	0.943	5
EEF1G	0.673703	6.95977e-145	2.34642e-140	0.922	0.826	5
RPS2	0.468864	1.77908e-143	5.99798e-139	0.992	0.955	5
RPS5	0.525811	1.02782e-141	3.46518e-137	0.978	0.907	5
RPL14	0.441872	1.80314e-139	6.07909e-135	0.979	0.932	5
RPS23	0.438335	3.41071e-137	1.14989e-132	0.994	0.944	5
RPS4X	0.446102	4.62459e-137	1.55914e-132	0.991	0.94	5
RPL17	0.502895	1.88419e-134	6.35235e-130	0.986	0.933	5
RPL35A	0.432778	2.09881e-134	7.07592e-130	0.993	0.936	5
RPS16	0.475547	1.35e-132	4.55138e-128	0.976	0.931	5
RPL7	0.714966	2.01023e-132	6.77729e-128	0.944	0.851	5
CCR7	0.774498	2.94424e-132	9.92621e-128	0.419	0.134	5
RPS12	0.436121	1.65539e-129	5.581e-125	1	0.961	5
RPL5	0.510214	2.01605e-127	6.7969e-123	0.962	0.902	5
RPL31	0.663083	3.62821e-125	1.22321e-120	0.956	0.872	5
RPL23A	0.524497	1.3061e-123	4.4034e-119	0.986	0.942	5
RPL18A	0.389794	7.82127e-120	2.63686e-115	0.992	0.949	5
RPS13	0.482098	2.24065e-119	7.55413e-115	0.982	0.928	5
RPS9	0.422959	2.16506e-116	7.29927e-112	0.982	0.927	5
LTB	0.744114	3.38315e-112	1.14059e-107	0.683	0.371	5
RPL36A	0.493621	1.90874e-111	6.43512e-107	0.955	0.884	5
EEF1A1	0.380007	8.35534e-110	2.81692e-105	0.999	0.973	5
RPS27	0.352955	2.18998e-109	7.38329e-105	0.997	0.971	5
RPL13A	0.663822	3.00191e-108	1.01206e-103	0.96	0.91	5
RPS8	0.453175	9.48643e-106	3.19825e-101	0.994	0.946	5
RPL41	0.284822	1.21244e-103	4.08763e-99	1	0.971	5
RPS15	0.313034	1.79996e-101	6.0684e-97	0.987	0.957	5
RPL26	0.323535	2.13027e-100	7.18201e-96	0.992	0.949	5
RPL8	0.372044	1.57262e-97	5.30193e-93	0.982	0.937	5
RPL39	0.395691	2.26458e-96	7.63482e-92	0.991	0.941	5
RPSA	0.412702	7.41986e-95	2.50153e-90	0.955	0.897	5
RPL22	0.494027	1.0956e-94	3.69369e-90	0.927	0.85	5
RPL18	0.354932	1.11975e-94	3.77511e-90	0.98	0.935	5
RPL36	0.366755	5.54332e-93	1.86887e-88	0.977	0.922	5
RPS10	0.678766	1.12753e-92	3.80134e-88	0.779	0.515	5
TPT1	0.373773	1.65299e-92	5.57289e-88	0.995	0.952	5
RPL4	0.474943	1.68241e-92	5.67208e-88	0.914	0.841	5
RPL15	0.372753	1.58054e-91	5.32864e-87	0.981	0.932	5
RPS29	0.595217	1.2515e-89	4.2193e-85	0.974	0.914	5
RPS20	0.674714	2.30427e-89	7.76862e-85	0.896	0.789	5
RPS17	0.664358	2.62967e-89	8.86566e-85	0.888	0.745	5
RPL27	0.421583	1.64745e-84	5.55421e-80	0.948	0.891	5
LEF1	0.593913	3.42159e-83	1.15356e-78	0.325	0.116	5
NOP53	0.500271	1.83079e-79	6.17233e-75	0.841	0.703	5
RPL6	0.326308	3.60204e-79	1.21439e-74	0.98	0.931	5
RPS28	0.370842	3.73243e-79	1.25835e-74	0.988	0.94	5
RPL38	0.476343	2.43283e-78	8.20204e-74	0.901	0.847	5
RPS15A	0.264565	1.32006e-77	4.45044e-73	0.998	0.96	5
RACK1	0.345383	8.01228e-76	2.70126e-71	0.971	0.904	5
EEF1B2	0.474004	7.15735e-75	2.41303e-70	0.895	0.807	5
RPL12	0.320581	8.34723e-75	2.81418e-70	0.986	0.94	5
TCF7	0.593225	1.04455e-73	3.52161e-69	0.486	0.243	5
RPL35	0.333952	9.90181e-72	3.3383e-67	0.971	0.921	5
RPL30	0.316217	6.7354e-69	2.27077e-64	0.997	0.953	5
SELL	0.570444	1.72542e-68	5.81707e-64	0.36	0.15	5
RPL27A	0.610388	2.58978e-65	8.73119e-61	0.925	0.88	5
RPLP0	0.355797	3.02496e-65	1.01984e-60	0.974	0.906	5
UBA52	0.319042	3.22379e-65	1.08687e-60	0.974	0.905	5
RPL29	0.332907	4.28964e-65	1.44621e-60	0.975	0.93	5
RPL37	0.362567	1.70776e-64	5.75756e-60	0.978	0.928	5
RPL24	0.274723	1.05313e-62	3.55053e-58	0.959	0.915	5
SNHG29	0.476956	1.34537e-62	4.5358e-58	0.782	0.656	5
MT-ND2	0.46943	2.06e-59	6.94509e-55	0.95	0.932	5
GAS5	0.491913	3.92372e-59	1.32284e-54	0.75	0.617	5
EIF3E	0.489848	1.60224e-56	5.40179e-52	0.696	0.545	5
LDHB	0.497446	2.86263e-56	9.65106e-52	0.716	0.599	5
MT-ND4	0.299496	3.60401e-52	1.21505e-47	0.95	0.939	5
RPL23	0.437893	7.03589e-52	2.37208e-47	0.856	0.771	5
RPL37A	0.318197	8.96082e-52	3.02105e-47	0.945	0.888	5
RPS11	0.342071	2.31249e-50	7.79633e-46	0.928	0.86	5
RPS4Y1	0.426914	4.00769e-47	1.35115e-42	0.753	0.663	5
PIK3IP1	0.47131	1.95048e-44	6.57586e-40	0.484	0.312	5
TMEM123	0.437286	2.21613e-43	7.47147e-39	0.446	0.268	5
SNHG32	0.479076	6.55693e-43	2.2106e-38	0.47	0.293	5
RPS21	0.299901	1.16879e-42	3.94045e-38	0.95	0.902	5
NACA	0.275019	5.36669e-41	1.80933e-36	0.932	0.891	5
PABPC1	0.286552	5.12079e-32	1.72642e-27	0.876	0.801	5
TOMM7	0.284374	4.61274e-31	1.55514e-26	0.824	0.764	5
NPM1	0.261002	1.89895e-28	6.40211e-24	0.872	0.81	5
FOXP1	0.333097	4.01487e-27	1.35357e-22	0.455	0.317	5
HINT1	0.270383	3.46679e-26	1.16879e-21	0.806	0.748	5
NOSIP	0.454123	7.3158e-26	2.46645e-21	0.419	0.304	5
IGKC	0.497976	9.2039e-26	3.103e-21	0.334	0.185	5
PRKCQ-AS1	0.361727	2.29556e-25	7.73924e-21	0.293	0.175	5
NELL2	0.33237	1.45293e-22	4.8984e-18	0.336	0.214	5
TRAC	0.301121	2.82666e-22	9.52981e-18	0.695	0.599	5
SATB1	0.266809	2.8408e-22	9.57748e-18	0.281	0.165	5
NAP1L1	0.342395	4.17618e-22	1.40796e-17	0.597	0.501	5
LINC02446	0.410397	1.01381e-21	3.41797e-17	0.357	0.231	5
SNHG6	0.327796	1.62413e-21	5.47559e-17	0.622	0.542	5
FXYD5	0.252904	2.19668e-18	7.40587e-14	0.744	0.677	5
RGS10	0.295659	2.26186e-16	7.62563e-12	0.493	0.414	5
SNHG5	0.382487	2.77192e-16	9.34526e-12	0.56	0.491	5
SMDT1	0.287047	9.7623e-16	3.29126e-11	0.513	0.434	5
TXNIP	0.257527	3.54082e-14	1.19375e-09	0.618	0.552	5
LYAR	0.313375	1.24669e-09	4.2031e-05	0.421	0.364	5
GPR183	0.279305	4.83946e-08	0.00163157	0.272	0.209	5
MALAT1	1.30931	0	0	0.998	0.995	6
MT-CO1	1.2261	0	0	0.983	0.992	6
MT-CO2	1.20845	0	0	0.984	0.987	6
MT-CYB	1.18189	4.74841e-297	1.60088e-292	0.968	0.963	6
MT-ATP6	1.16576	4.37517e-293	1.47504e-288	0.975	0.97	6
MT-CO3	1.21132	1.31064e-292	4.4187e-288	0.974	0.969	6
MT-ND4	1.18381	5.32913e-229	1.79666e-224	0.935	0.94	6
MT-ND1	1.12303	2.19902e-225	7.41378e-221	0.932	0.934	6
MT-ND2	1.24321	7.35124e-219	2.4784e-214	0.941	0.933	6
MT-ND3	1.1575	7.66357e-211	2.5837e-206	0.897	0.92	6
MT-ND5	1.17857	3.80477e-145	1.28274e-140	0.802	0.814	6
MT-ND4L	1.1763	2.23182e-44	7.52436e-40	0.615	0.657	6
NEAT1	1.12944	1.1003e-39	3.70955e-35	0.585	0.618	6
MTRNR2L12	1.37974	2.76916e-37	9.33595e-33	0.59	0.639	6
FUS	0.862163	1.16171e-25	3.91659e-21	0.561	0.694	6
PIK3IP1	0.264032	2.3913e-24	8.06203e-20	0.132	0.339	6
TMC6	0.278619	1.53501e-23	5.17512e-19	0.162	0.39	6
VCP	0.263152	3.28782e-23	1.10846e-18	0.201	0.462	6
HSPD1	0.341049	1.68388e-22	5.67704e-18	0.183	0.418	6
TBC1D10C	0.251435	1.73799e-22	5.85946e-18	0.266	0.588	6
KPNB1	0.274349	1.09731e-21	3.69947e-17	0.146	0.351	6
LRRFIP1	0.266162	2.26015e-21	7.61986e-17	0.256	0.553	6
WAC	0.260681	2.37642e-21	8.01187e-17	0.132	0.325	6
DEF6	0.261741	3.81084e-21	1.28479e-16	0.168	0.388	6
RASAL3	0.264225	4.83784e-21	1.63103e-16	0.216	0.477	6
EWSR1	0.287786	9.4161e-21	3.17454e-16	0.21	0.464	6
MYO1G	0.259053	9.70896e-21	3.27328e-16	0.159	0.369	6
TRA2B	0.294558	1.41228e-20	4.76136e-16	0.22	0.48	6
ATXN2L	0.259334	9.3548e-20	3.15388e-15	0.134	0.32	6
MYLIP	0.283954	1.47285e-19	4.96555e-15	0.143	0.333	6
FLNA	0.283796	4.6334e-19	1.56211e-14	0.258	0.535	6
SMARCA5	0.260359	5.86929e-19	1.97877e-14	0.157	0.355	6
RSRC2	0.263614	6.45362e-19	2.17577e-14	0.201	0.435	6
PHF3	0.285827	6.64293e-19	2.2396e-14	0.148	0.34	6
ATP1B3	0.348818	7.60687e-19	2.56458e-14	0.152	0.338	6
RASGRP1	0.285094	1.13764e-18	3.83544e-14	0.143	0.329	6
MED15	0.252985	1.38674e-18	4.67527e-14	0.108	0.267	6
FGD3	0.26717	2.58631e-18	8.71949e-14	0.104	0.26	6
BRD4	0.343078	2.81749e-18	9.49889e-14	0.178	0.392	6
ROCK1	0.284312	3.67481e-18	1.23892e-13	0.2	0.427	6
PARP8	0.301621	3.86319e-18	1.30244e-13	0.189	0.409	6
SPOCK2	0.266192	3.93969e-18	1.32823e-13	0.235	0.488	6
ATP1A1	0.338791	6.50735e-18	2.19389e-13	0.17	0.374	6
PAFAH1B1	0.251318	8.082e-18	2.72476e-13	0.17	0.371	6
MAP4K1	0.2985	1.21939e-17	4.11105e-13	0.119	0.282	6
EIF5B	0.334731	1.34471e-17	4.53357e-13	0.125	0.29	6
IDI1	0.258092	1.64027e-17	5.53001e-13	0.148	0.329	6
RNF149	0.328729	1.65244e-17	5.57104e-13	0.194	0.415	6
SPTAN1	0.301106	1.81333e-17	6.11345e-13	0.176	0.382	6
FNBP1	0.348184	1.84457e-17	6.21878e-13	0.237	0.494	6
WNK1	0.352013	4.5578e-17	1.53662e-12	0.19	0.404	6
PREX1	0.34457	4.89585e-17	1.65059e-12	0.17	0.367	6
RSBN1L	0.345191	4.96037e-17	1.67234e-12	0.155	0.341	6
PHF1	0.250287	5.09535e-17	1.71785e-12	0.132	0.301	6
PPP1R12A	0.286715	6.25293e-17	2.10811e-12	0.203	0.428	6
WASHC1	0.37056	6.5295e-17	2.20135e-12	0.139	0.313	6
DNM2	0.253645	6.61037e-17	2.22862e-12	0.141	0.315	6
SQSTM1	0.360905	8.10688e-17	2.73315e-12	0.251	0.513	6
RIPOR2	0.296976	9.75124e-17	3.28753e-12	0.141	0.312	6
YTHDC1	0.277966	1.30507e-16	4.39992e-12	0.156	0.34	6
CD44	0.306797	1.35822e-16	4.57909e-12	0.335	0.676	6
SRRT	0.261633	2.28604e-16	7.70717e-12	0.148	0.322	6
CFLAR	0.353463	2.3112e-16	7.79198e-12	0.2	0.418	6
SMARCA2	0.269684	3.36258e-16	1.13366e-11	0.158	0.34	6
IDS	0.299289	3.49141e-16	1.17709e-11	0.291	0.588	6
SENP6	0.275063	3.96711e-16	1.33747e-11	0.115	0.266	6
SLTM	0.331348	5.40017e-16	1.82061e-11	0.178	0.376	6
TTC3	0.363683	5.64991e-16	1.90481e-11	0.134	0.298	6
DDX39A	0.362873	5.74341e-16	1.93633e-11	0.153	0.332	6
DDX21	0.308036	7.1954e-16	2.42586e-11	0.148	0.322	6
ANAPC5	0.306206	8.22931e-16	2.77443e-11	0.152	0.327	6
CORO7	0.312577	8.37525e-16	2.82363e-11	0.11	0.255	6
IKZF1	0.391657	8.61942e-16	2.90595e-11	0.244	0.499	6
RBBP6	0.328022	9.24244e-16	3.11599e-11	0.183	0.384	6
ARHGAP15	0.296114	1.13862e-15	3.83875e-11	0.182	0.381	6
PRKCH	0.312133	1.47743e-15	4.98099e-11	0.248	0.501	6
ZC3HAV1	0.389058	1.48718e-15	5.01387e-11	0.217	0.444	6
PPP4R3A	0.32299	2.53763e-15	8.55538e-11	0.152	0.325	6
XAF1	0.282712	2.83249e-15	9.54947e-11	0.154	0.325	6
NAP1L4	0.321115	2.91762e-15	9.83645e-11	0.197	0.404	6
ITGAE	0.305736	3.1026e-15	1.04601e-10	0.119	0.266	6
CNOT6L	0.323308	3.10931e-15	1.04827e-10	0.184	0.376	6
CYTH1	0.331664	3.23482e-15	1.09059e-10	0.159	0.338	6
SETX	0.284758	3.99635e-15	1.34733e-10	0.12	0.269	6
BRD2	0.307489	4.53123e-15	1.52766e-10	0.292	0.575	6
NSD3	0.412812	4.56575e-15	1.5393e-10	0.222	0.451	6
CSNK1D	0.323202	4.79987e-15	1.61823e-10	0.135	0.294	6
YME1L1	0.410425	5.40873e-15	1.8235e-10	0.148	0.317	6
CBX4	0.308822	5.63353e-15	1.89929e-10	0.111	0.252	6
EPB41	0.379182	8.21509e-15	2.76964e-10	0.143	0.308	6
ZNF207	0.368648	1.43801e-14	4.84812e-10	0.172	0.355	6
GLCCI1	0.260366	1.97552e-14	6.66026e-10	0.115	0.255	6
GLG1	0.353036	2.26132e-14	7.62381e-10	0.155	0.325	6
EIF5	0.293365	2.60892e-14	8.7957e-10	0.302	0.594	6
RABGAP1L	0.354633	2.73577e-14	9.22338e-10	0.17	0.351	6
BCLAF1	0.380951	4.78889e-14	1.61453e-09	0.249	0.497	6
SCAF11	0.400905	5.08424e-14	1.7141e-09	0.204	0.41	6
NEU1	0.402231	5.69276e-14	1.91926e-09	0.137	0.287	6
TBRG1	0.350171	7.27667e-14	2.45326e-09	0.137	0.29	6
CNOT2	0.356058	9.39361e-14	3.16696e-09	0.143	0.3	6
DPP7	0.434113	9.49917e-14	3.20255e-09	0.228	0.456	6
CEP350	0.321077	1.06499e-13	3.59051e-09	0.132	0.28	6
PDE4D	0.274767	1.1126e-13	3.75102e-09	0.156	0.318	6
DDX46	0.428711	1.31095e-13	4.41975e-09	0.185	0.373	6
BIRC3	0.283904	1.39751e-13	4.71155e-09	0.157	0.316	6
PIAS1	0.289157	1.48662e-13	5.01199e-09	0.122	0.262	6
STK10	0.372793	1.55126e-13	5.22991e-09	0.196	0.393	6
MT-ND6	1.05345	2.15591e-13	7.26844e-09	0.402	0.42	6
ITGA4	0.368157	2.20278e-13	7.42644e-09	0.23	0.451	6
RALGDS	0.364318	2.27739e-13	7.67798e-09	0.138	0.289	6
TGOLN2	0.327218	2.27874e-13	7.68256e-09	0.163	0.331	6
PDS5A	0.25991	2.32996e-13	7.85522e-09	0.116	0.251	6
NR3C1	0.385232	2.34211e-13	7.89618e-09	0.22	0.431	6
SEMA4D	0.367612	3.3095e-13	1.11576e-08	0.183	0.365	6
ATP2A3	0.387945	4.71822e-13	1.5907e-08	0.139	0.289	6
MTCH1	0.390541	5.67765e-13	1.91416e-08	0.147	0.304	6
NOP56	0.284303	6.65874e-13	2.24493e-08	0.124	0.259	6
SLC20A1	0.35989	7.06381e-13	2.38149e-08	0.127	0.267	6
LINC01578	0.332701	1.06565e-12	3.59272e-08	0.284	0.545	6
CAMK4	0.257754	1.17672e-12	3.9672e-08	0.13	0.27	6
RNF125	0.353704	1.26013e-12	4.24842e-08	0.159	0.319	6
RBM33	0.313129	1.40295e-12	4.72989e-08	0.12	0.254	6
CHKB	0.383185	1.63797e-12	5.52225e-08	0.129	0.269	6
NFKB1	0.446215	1.72941e-12	5.83054e-08	0.153	0.308	6
ACADVL	0.404772	1.7594e-12	5.93164e-08	0.154	0.31	6
DDX6	0.379361	1.78609e-12	6.02161e-08	0.242	0.47	6
IRF1	0.302939	1.91043e-12	6.44083e-08	0.332	0.62	6
CCDC12	0.465592	1.93992e-12	6.54024e-08	0.205	0.403	6
LYST	0.32968	1.96478e-12	6.62406e-08	0.181	0.353	6
TPR	0.328295	2.14368e-12	7.22721e-08	0.213	0.412	6
XRN1	0.323107	2.71326e-12	9.14749e-08	0.127	0.263	6
ANKHD1	0.422142	3.30177e-12	1.11316e-07	0.171	0.339	6
MPHOSPH8	0.394378	3.95818e-12	1.33446e-07	0.239	0.461	6
RSF1	0.387851	4.50012e-12	1.51717e-07	0.184	0.36	6
GPBP1	0.396477	4.65373e-12	1.56896e-07	0.226	0.435	6
HNRNPU	0.326017	5.17338e-12	1.74415e-07	0.316	0.613	6
SETD2	0.351126	5.75157e-12	1.93908e-07	0.138	0.279	6
AHNAK	0.336468	7.31808e-12	2.46722e-07	0.286	0.524	6
ITK	0.387903	1.01557e-11	3.42389e-07	0.18	0.349	6
CD55	0.386136	1.0976e-11	3.70045e-07	0.144	0.285	6
SNHG1	0.329394	1.27666e-11	4.30414e-07	0.13	0.264	6
NIPBL	0.39195	1.50294e-11	5.067e-07	0.166	0.324	6
PTPN22	0.403103	2.22791e-11	7.51116e-07	0.191	0.365	6
ARHGAP45	0.440575	3.12207e-11	1.05258e-06	0.227	0.434	6
ERICH1	0.392198	3.30718e-11	1.11498e-06	0.129	0.26	6
BAZ1A	0.385106	3.54677e-11	1.19576e-06	0.185	0.353	6
TMEM165	0.348597	3.5893e-11	1.2101e-06	0.133	0.265	6
GDI1	0.343522	3.98282e-11	1.34277e-06	0.132	0.264	6
NFATC2	0.410649	4.11782e-11	1.38828e-06	0.184	0.351	6
TGFBR2	0.383245	4.26345e-11	1.43738e-06	0.174	0.334	6
CDK13	0.412448	6.11703e-11	2.0623e-06	0.163	0.317	6
SF3B1	0.373919	6.27678e-11	2.11615e-06	0.276	0.524	6
ADAR	0.414888	6.36284e-11	2.14517e-06	0.248	0.47	6
SAFB2	0.399993	7.32722e-11	2.4703e-06	0.147	0.287	6
IVNS1ABP	0.364192	9.17548e-11	3.09342e-06	0.172	0.325	6
MYCBP2	0.438332	1.04e-10	3.50625e-06	0.205	0.388	6
NOP58	0.397267	1.15699e-10	3.90068e-06	0.196	0.368	6
KTN1	0.469244	2.11028e-10	7.11459e-06	0.206	0.389	6
BCL11B	0.470893	2.62542e-10	8.85135e-06	0.239	0.445	6
SLC38A1	0.43164	2.71633e-10	9.15783e-06	0.252	0.471	6
ATP2B4	0.358084	3.53905e-10	1.19315e-05	0.143	0.276	6
GPRIN3	0.385599	4.43622e-10	1.49563e-05	0.131	0.255	6
SPSB3	0.424878	5.02252e-10	1.69329e-05	0.176	0.331	6
ARHGAP9	0.420799	5.11739e-10	1.72528e-05	0.261	0.482	6
CLEC2D	0.359078	5.96013e-10	2.0094e-05	0.285	0.523	6
ITSN2	0.431393	8.29308e-10	2.79593e-05	0.195	0.362	6
ATF7IP	0.388091	1.26803e-09	4.27502e-05	0.167	0.311	6
CDK17	0.410232	1.32582e-09	4.46987e-05	0.17	0.315	6
ANKRD13D	0.427966	1.42336e-09	4.79871e-05	0.146	0.277	6
BPTF	0.475951	1.56741e-09	5.28438e-05	0.213	0.392	6
ACAP1	0.848753	1.57993e-09	5.32658e-05	0.481	0.637	6
STT3B	0.414108	1.59154e-09	5.36573e-05	0.151	0.283	6
TTC19	0.430193	1.62538e-09	5.4798e-05	0.146	0.276	6
CCNH	0.470405	1.70105e-09	5.73491e-05	0.22	0.401	6
IRF9	0.427726	2.11789e-09	7.14025e-05	0.23	0.421	6
INPP4B	0.387441	2.50397e-09	8.4419e-05	0.146	0.274	6
NCKAP1L	0.361024	3.79751e-09	0.000128029	0.133	0.252	6
ACIN1	0.423437	4.63835e-09	0.000156377	0.149	0.277	6
GON4L	0.405765	4.74868e-09	0.000160097	0.134	0.253	6
PRPF8	0.482065	6.31298e-09	0.000212836	0.189	0.346	6
RBM39	0.678545	6.51513e-09	0.000219651	0.517	0.723	6
BIRC6	0.393304	6.53546e-09	0.000220337	0.153	0.282	6
CDC37	0.443948	7.8725e-09	0.000265413	0.288	0.531	6
RBPJ	0.389207	8.39565e-09	0.000283051	0.165	0.296	6
CSNK1G2	0.476226	9.81314e-09	0.00033084	0.144	0.267	6
CHORDC1	0.412015	1.20835e-08	0.000407385	0.149	0.274	6
PAG1	0.407996	1.51998e-08	0.000512445	0.183	0.328	6
INTS6	0.356156	1.79688e-08	0.000605799	0.139	0.254	6
BDP1	0.42098	1.80797e-08	0.000609537	0.167	0.302	6
EPC1	0.46592	2.06797e-08	0.000697194	0.285	0.521	6
MLLT6	0.445931	3.04973e-08	0.00102819	0.148	0.27	6
OFD1	0.48963	3.16211e-08	0.00106607	0.143	0.261	6
PTK2B	0.436846	5.96466e-08	0.00201093	0.14	0.253	6
PRPF4B	0.49651	5.98424e-08	0.00201753	0.188	0.335	6
TAF1D	0.515209	7.1219e-08	0.00240108	0.234	0.418	6
RNF19A	0.442477	8.02939e-08	0.00270703	0.225	0.395	6
RNF213	0.884316	9.28814e-08	0.0031314	0.475	0.63	6
PTPN7	0.485328	1.08136e-07	0.00364568	0.247	0.435	6
JAK3	0.48242	1.21629e-07	0.00410061	0.158	0.281	6
NCOR1	0.456495	1.2296e-07	0.00414546	0.281	0.504	6
IGF2R	0.41134	1.50108e-07	0.00506075	0.144	0.256	6
ITGAL	0.507251	1.9004e-07	0.00640701	0.202	0.353	6
TCIRG1	0.534854	1.95656e-07	0.00659634	0.169	0.299	6
CCDC88C	0.456044	1.98388e-07	0.00668845	0.189	0.331	6
ADGRE5	0.513139	2.11761e-07	0.00713932	0.305	0.543	6
KAT6B	0.44167	2.32053e-07	0.00782343	0.143	0.254	6
ZNF683	0.968034	2.25672e-256	7.60832e-252	0.604	0.149	7
CAPG	0.85503	1.04703e-219	3.52997e-215	0.575	0.161	7
VIM	0.830486	4.62985e-181	1.56091e-176	0.981	0.822	7
LGALS3	0.648575	6.01946e-151	2.0294e-146	0.691	0.282	7
SPRY1	0.502316	1.34446e-133	4.53273e-129	0.256	0.05	7
ZFP36L2	0.724936	2.33743e-131	7.88042e-127	0.969	0.825	7
LDLRAD4	0.66504	3.23371e-129	1.09021e-124	0.532	0.198	7
KLRC1	0.596615	5.81221e-117	1.95953e-112	0.315	0.08	7
ITGA1	0.430799	1.06406e-110	3.58738e-106	0.382	0.115	7
HOPX	0.547451	1.61485e-106	5.4443e-102	0.651	0.295	7
TNFAIP3	0.667387	3.84969e-102	1.29789e-97	0.914	0.699	7
ANXA1	0.636509	1.32202e-100	4.45705e-96	0.901	0.596	7
ANKRD28	0.461869	1.92528e-96	6.49088e-92	0.314	0.092	7
GPR183	0.583686	1.28631e-93	4.33667e-89	0.48	0.194	7
CKLF	0.586388	2.25026e-93	7.58654e-89	0.756	0.466	7
S100A4	0.485127	3.16688e-91	1.06768e-86	0.975	0.767	7
NBL1	0.358213	9.30825e-90	3.13818e-85	0.368	0.123	7
LMNA	0.67497	1.71324e-87	5.77603e-83	0.526	0.237	7
ZFP36	0.610613	3.47188e-83	1.17051e-78	0.923	0.754	7
AL133415.1	0.534893	1.98311e-81	6.68586e-77	0.399	0.162	7
ALOX5AP	0.460331	1.88881e-79	6.36792e-75	0.783	0.461	7
CD7	0.485053	6.53791e-78	2.20419e-73	0.896	0.681	7
PERP	0.357281	3.49012e-77	1.17666e-72	0.323	0.11	7
PFKFB3	0.411343	2.54392e-75	8.57659e-71	0.389	0.153	7
MYADM	0.62938	1.84605e-72	6.22376e-68	0.694	0.43	7
TAGLN2	0.461191	3.1372e-71	1.05768e-66	0.837	0.586	7
AUTS2	0.48237	9.11952e-68	3.07456e-63	0.395	0.168	7
CSRNP1	0.538419	5.86736e-67	1.97812e-62	0.653	0.397	7
CD226	0.293236	9.84906e-67	3.32051e-62	0.26	0.084	7
SAMSN1	0.402825	1.71633e-65	5.78644e-61	0.675	0.377	7
JUND	0.541717	7.0886e-65	2.38985e-60	0.883	0.685	7
S100A10	0.40024	7.30423e-65	2.46255e-60	0.871	0.642	7
PTGER4	0.469254	1.04464e-64	3.5219e-60	0.655	0.39	7
PRNP	0.379985	3.30481e-63	1.11418e-58	0.499	0.25	7
PPP1R15A	0.486181	1.5612e-62	5.26343e-58	0.803	0.554	7
KLF6	0.501701	1.67388e-62	5.64332e-58	0.914	0.753	7
TGFB1	0.449858	7.45102e-62	2.51204e-57	0.773	0.537	7
XCL1	0.549502	2.27711e-60	7.67703e-56	0.307	0.117	7
ZYX	0.405657	2.57977e-59	8.69744e-55	0.664	0.414	7
PARP8	0.389402	1.42967e-58	4.81998e-54	0.627	0.377	7
PMEPA1	0.346716	6.98142e-58	2.35372e-53	0.383	0.17	7
ITGAE	0.404786	1.59279e-57	5.36995e-53	0.476	0.24	7
FOSL2	0.400146	5.76884e-57	1.94491e-52	0.486	0.25	7
AHNAK	0.428472	7.31318e-56	2.46557e-51	0.737	0.491	7
TMEM14C	0.310347	2.14505e-55	7.23183e-51	0.355	0.153	7
SH3BGRL3	0.347116	1.12469e-54	3.79179e-50	0.98	0.898	7
EML4	0.309899	4.85813e-54	1.63787e-49	0.707	0.462	7
PER1	0.348177	7.37905e-54	2.48777e-49	0.422	0.207	7
STK17B	0.355021	1.42899e-52	4.81771e-48	0.837	0.61	7
SLC7A5	0.37208	2.81704e-52	9.49737e-48	0.607	0.372	7
TIPARP	0.394481	9.02881e-52	3.04397e-47	0.457	0.243	7
SMAD7	0.407419	2.04554e-51	6.89633e-47	0.569	0.334	7
MXRA7	0.335757	2.91964e-51	9.84327e-47	0.348	0.156	7
RGCC	0.515524	3.30645e-51	1.11474e-46	0.744	0.518	7
CRIP1	0.392252	5.60751e-50	1.89052e-45	0.964	0.811	7
TIMP1	0.306552	6.84076e-50	2.30629e-45	0.279	0.112	7
GLIPR1	0.338586	1.71376e-49	5.77777e-45	0.535	0.3	7
CDKN1A	0.395685	5.11129e-49	1.72322e-44	0.301	0.127	7
PTPN22	0.319143	4.43613e-48	1.4956e-43	0.575	0.337	7
JAML	0.303712	4.76397e-48	1.60612e-43	0.437	0.221	7
TSC22D3	0.443954	5.52452e-48	1.86254e-43	0.911	0.734	7
TENT5C	0.384129	7.60329e-48	2.56337e-43	0.604	0.372	7
TPM4	0.325969	1.66452e-47	5.61176e-43	0.522	0.295	7
PDE4D	0.352962	1.2633e-46	4.25909e-42	0.512	0.292	7
NFKBIA	0.491997	8.00638e-46	2.69927e-41	0.773	0.583	7
IL7R	0.415132	9.08981e-46	3.06454e-41	0.536	0.29	7
PLK3	0.329454	1.75282e-45	5.90945e-41	0.457	0.249	7
SYTL2	0.329572	2.00392e-45	6.75603e-41	0.354	0.171	7
CYTIP	0.348031	8.61312e-45	2.90383e-40	0.762	0.546	7
PGK1	0.328884	8.71213e-45	2.93721e-40	0.786	0.588	7
FOSB	0.543595	1.11051e-44	3.74398e-40	0.678	0.461	7
BTG1	0.288688	1.29013e-44	4.34955e-40	0.979	0.937	7
IDS	0.331532	2.47662e-44	8.34966e-40	0.754	0.553	7
UBC	0.26476	2.78235e-44	9.38043e-40	0.987	0.905	7
GZMB	0.316044	8.56446e-44	2.88742e-39	0.735	0.471	7
RORA	0.287074	1.34906e-43	4.54823e-39	0.512	0.285	7
S100A6	0.303136	1.91112e-43	6.44315e-39	0.957	0.842	7
NR4A1	0.50633	3.54216e-43	1.19421e-38	0.404	0.214	7
CD52	0.318344	7.41676e-43	2.50049e-38	0.955	0.813	7
EMB	0.319131	8.81281e-42	2.97115e-37	0.607	0.392	7
YWHAZ	0.287473	1.15855e-41	3.90595e-37	0.899	0.735	7
STOM	0.267348	2.86298e-41	9.65223e-37	0.515	0.289	7
IVNS1ABP	0.324867	1.47172e-40	4.96176e-36	0.502	0.301	7
CD99	0.268629	2.13908e-40	7.21168e-36	0.891	0.708	7
MYH9	0.361069	2.58677e-39	8.72104e-35	0.772	0.578	7
CAMK4	0.261049	1.44048e-38	4.85644e-34	0.446	0.247	7
RASGEF1B	0.31605	6.19802e-38	2.0896e-33	0.312	0.15	7
PTGER2	0.296147	7.02589e-38	2.36871e-33	0.265	0.117	7
FKBP11	0.308931	3.60383e-37	1.215e-32	0.424	0.238	7
TSC22D2	0.312416	4.90199e-37	1.65266e-32	0.344	0.18	7
ARHGAP9	0.287827	6.61916e-37	2.23158e-32	0.659	0.453	7
CD96	0.27881	1.05205e-36	3.5469e-32	0.683	0.476	7
ARL4C	0.326436	1.71935e-36	5.79663e-32	0.793	0.599	7
GABARAPL1	0.278971	4.14864e-36	1.39867e-31	0.528	0.32	7
PHLDA1	0.338277	7.03183e-36	2.37071e-31	0.417	0.229	7
SMURF2	0.267099	7.04873e-36	2.37641e-31	0.323	0.165	7
PLEC	0.259937	2.6541e-35	8.94802e-31	0.43	0.245	7
MCL1	0.29979	3.02093e-35	1.01848e-30	0.838	0.65	7
CD2	0.259417	6.80439e-35	2.29403e-30	0.892	0.705	7
LEPROTL1	0.25161	1.99462e-34	6.72467e-30	0.806	0.609	7
SLK	0.268331	2.27106e-34	7.65664e-30	0.312	0.161	7
JUN	0.334575	2.4061e-34	8.11192e-30	0.932	0.744	7
FOS	0.393492	2.59655e-34	8.75402e-30	0.789	0.595	7
ACTB	0.253253	1.05875e-33	3.56946e-29	0.996	0.964	7
HSPA5	0.278623	2.85701e-33	9.63211e-29	0.771	0.578	7
ZC3H12A	0.301	1.09067e-32	3.67708e-28	0.356	0.195	7
CDK17	0.255771	1.16019e-32	3.91146e-28	0.475	0.293	7
OSTF1	0.257824	2.25925e-32	7.61684e-28	0.558	0.366	7
NR3C1	0.258985	3.4756e-32	1.17176e-27	0.598	0.404	7
HIF1A	0.254921	1.57325e-31	5.30406e-27	0.419	0.246	7
PDCL3	0.283895	2.25852e-31	7.61438e-27	0.374	0.211	7
JMJD6	0.257547	5.45147e-31	1.83791e-26	0.506	0.318	7
YPEL5	0.275046	1.0389e-30	3.50253e-26	0.778	0.576	7
ATF3	0.347031	1.1442e-30	3.85756e-26	0.283	0.142	7
NR4A3	0.332643	1.29922e-30	4.38018e-26	0.385	0.222	7
LGALS1	0.32768	7.76037e-30	2.61633e-25	0.661	0.455	7
UBALD2	0.283594	8.03607e-30	2.70928e-25	0.598	0.41	7
CD69	0.364162	2.37571e-29	8.00946e-25	0.852	0.681	7
THEMIS	0.253545	6.20036e-29	2.09039e-24	0.519	0.336	7
FTH1	0.290555	2.03666e-28	6.86638e-24	0.992	0.946	7
DUSP10	0.258749	2.20724e-28	7.44148e-24	0.325	0.178	7
PPP1R14B	0.302746	3.68003e-28	1.24069e-23	0.372	0.215	7
IFITM3	0.265828	6.80435e-28	2.29402e-23	0.528	0.356	7
EGR1	0.348352	1.03428e-27	3.48697e-23	0.345	0.195	7
CXCR3	0.250392	1.35515e-27	4.56875e-23	0.547	0.357	7
S100A11	0.279228	3.03505e-26	1.02324e-21	0.744	0.568	7
XCL2	0.272636	4.93254e-26	1.66296e-21	0.33	0.182	7
CLIC3	0.250291	3.48905e-23	1.1763e-18	0.395	0.246	7
NFKBIZ	0.326758	6.50904e-23	2.19446e-18	0.445	0.303	7
IER5L	0.281997	1.18018e-22	3.97887e-18	0.337	0.202	7
JUNB	0.256685	6.28199e-22	2.11791e-17	0.924	0.803	7
CITED2	0.269808	1.17428e-21	3.95898e-17	0.572	0.405	7
TOB1	0.29826	1.5551e-21	5.24287e-17	0.482	0.329	7
GNLY	0.308147	3.57482e-14	1.20522e-09	0.401	0.277	7
FGFBP2	1.84573	0	0	0.856	0.085	8
CX3CR1	1.02947	0	0	0.497	0.037	8
PRSS23	0.824205	0	0	0.392	0.034	8
S1PR5	0.749565	0	0	0.453	0.066	8
GZMH	1.00082	6.26973e-269	2.11378e-264	0.971	0.513	8
PLEK	0.985028	7.49911e-266	2.52825e-261	0.624	0.171	8
NKG7	0.867215	2.35039e-257	7.92412e-253	0.999	0.812	8
GNLY	0.903866	2.52459e-242	8.51142e-238	0.782	0.25	8
SPON2	0.855098	6.49417e-232	2.18945e-227	0.411	0.079	8
TGFBR3	0.731024	7.91631e-229	2.6689e-224	0.47	0.104	8
FCRL6	0.691796	6.42096e-205	2.16476e-200	0.515	0.131	8
FCGR3A	0.636311	2.30789e-201	7.78083e-197	0.395	0.077	8
C1orf21	0.574799	5.43501e-195	1.83236e-190	0.407	0.086	8
VCL	0.491587	1.52681e-189	5.14749e-185	0.276	0.042	8
KLRD1	0.710841	1.48236e-182	4.99762e-178	0.753	0.286	8
FGR	0.51878	2.15149e-157	7.25352e-153	0.331	0.07	8
EFHD2	0.858255	1.10151e-154	3.71364e-150	0.725	0.399	8
S100A4	0.645443	5.68751e-144	1.91749e-139	0.957	0.768	8
ADGRG1	0.614114	2.16763e-140	7.30795e-136	0.488	0.154	8
PXN	0.509553	9.21856e-135	3.10795e-130	0.378	0.105	8
KLF3	0.626246	2.21663e-131	7.47316e-127	0.47	0.157	8
S1PR1	0.585809	2.01086e-129	6.77943e-125	0.422	0.131	8
ADRB2	0.502807	1.02888e-127	3.46878e-123	0.364	0.097	8
PRF1	0.686634	2.46845e-126	8.32212e-122	0.84	0.511	8
KLRG1	0.576703	5.94264e-125	2.0035e-120	0.597	0.234	8
SSBP3	0.476105	1.30452e-124	4.39805e-120	0.303	0.074	8
TTC38	0.50816	3.71184e-120	1.25141e-115	0.329	0.087	8
FLNA	0.728976	4.51909e-119	1.52356e-114	0.761	0.498	8
GZMB	0.471332	1.22512e-115	4.13037e-111	0.877	0.461	8
ZEB2	0.55532	1.3335e-114	4.49578e-110	0.651	0.287	8
EMP3	0.532218	7.09848e-107	2.39318e-102	0.869	0.623	8
TBX21	0.525778	5.40151e-99	1.82107e-94	0.452	0.173	8
MYBL1	0.41848	3.07733e-96	1.03749e-91	0.307	0.089	8
KLF2	0.473518	1.65367e-91	5.57519e-87	0.7	0.351	8
ITGB2	0.509392	1.80336e-87	6.07985e-83	0.851	0.648	8
C12orf75	0.513041	1.63173e-84	5.50121e-80	0.682	0.377	8
TMSB10	0.307693	2.27774e-83	7.67917e-79	0.997	0.954	8
RAP1B	0.492937	5.52734e-81	1.86349e-76	0.782	0.542	8
ITGB1	0.562393	6.70816e-80	2.26159e-75	0.624	0.344	8
TLE5	0.494094	9.9266e-78	3.34665e-73	0.822	0.604	8
SH3BGRL3	0.361928	1.48486e-77	5.00607e-73	0.985	0.897	8
CEP78	0.421985	1.53266e-75	5.16722e-71	0.283	0.091	8
PLAC8	0.530454	1.72149e-75	5.80384e-71	0.374	0.146	8
LGALS1	0.506659	9.13857e-75	3.08098e-70	0.757	0.448	8
S100A10	0.463657	2.92955e-73	9.8767e-69	0.846	0.644	8
RIPOR2	0.427059	2.58855e-71	8.72704e-67	0.554	0.282	8
PFN1	0.358378	2.09357e-69	7.05826e-65	0.977	0.908	8
BIN2	0.465679	4.62447e-68	1.55909e-63	0.646	0.394	8
DSTN	0.441769	6.54436e-65	2.20637e-60	0.472	0.232	8
CD52	0.419001	3.4255e-64	1.15487e-59	0.943	0.814	8
PTGER2	0.35165	3.49277e-64	1.17755e-59	0.311	0.114	8
SH3BP5	0.367841	2.80749e-63	9.46517e-59	0.329	0.129	8
P2RY8	0.41464	7.66342e-63	2.58365e-58	0.453	0.22	8
MYO1G	0.429817	5.01995e-61	1.69243e-56	0.578	0.338	8
RASGRP2	0.369187	1.79872e-59	6.06419e-55	0.372	0.161	8
TNF	0.539043	5.53282e-59	1.86534e-54	0.364	0.156	8
RORA	0.321457	3.64419e-57	1.2286e-52	0.542	0.284	8
CST7	0.314068	4.37241e-56	1.47411e-51	0.957	0.744	8
TXNIP	0.519231	7.06688e-56	2.38253e-51	0.752	0.543	8
MYO1F	0.345729	1.8102e-54	6.10289e-50	0.579	0.323	8
AHNAK	0.459828	1.18823e-53	4.006e-49	0.696	0.495	8
LITAF	0.359226	3.08895e-53	1.04141e-48	0.793	0.576	8
STK38	0.345831	7.3079e-52	2.46379e-47	0.333	0.147	8
PATL2	0.35024	2.07289e-51	6.98853e-47	0.306	0.128	8
TPST2	0.409307	9.60842e-51	3.23938e-46	0.507	0.292	8
CDC25B	0.381854	9.62869e-50	3.24622e-45	0.414	0.213	8
S100A6	0.306705	6.87924e-49	2.31927e-44	0.943	0.844	8
UCP2	0.395009	2.216e-46	7.47101e-42	0.63	0.414	8
CD99	0.328984	4.42302e-46	1.49118e-41	0.869	0.71	8
SYNE1	0.400927	4.15899e-45	1.40216e-40	0.521	0.319	8
SAMD3	0.35879	4.65054e-45	1.56788e-40	0.5	0.285	8
GZMM	0.318992	5.73911e-45	1.93488e-40	0.779	0.571	8
TGFB1	0.397934	6.16234e-44	2.07757e-39	0.714	0.541	8
SYTL1	0.33778	1.12984e-42	3.80915e-38	0.489	0.288	8
PPIA	0.298131	1.5122e-41	5.09823e-37	0.911	0.808	8
PTP4A2	0.350171	1.94322e-41	6.55136e-37	0.714	0.541	8
RASA3	0.325347	1.09504e-40	3.69183e-36	0.341	0.17	8
BHLHE40	0.44279	5.75905e-40	1.94161e-35	0.575	0.375	8
SSBP4	0.337716	6.22235e-39	2.0978e-34	0.499	0.316	8
YWHAQ	0.348972	1.61024e-38	5.42876e-34	0.65	0.463	8
RAP2B	0.292123	1.98073e-38	6.67784e-34	0.303	0.145	8
MATK	0.293382	2.59169e-38	8.73762e-34	0.49	0.281	8
SELPLG	0.364819	1.35293e-37	4.56127e-33	0.563	0.379	8
ABHD17A	0.374671	1.93867e-37	6.53602e-33	0.614	0.453	8
CCND3	0.353723	2.31829e-37	7.81587e-33	0.623	0.45	8
IER2	0.330862	4.40274e-37	1.48434e-32	0.812	0.651	8
SPN	0.331964	1.51843e-36	5.11924e-32	0.572	0.375	8
SLC9A3R1	0.393163	2.81485e-36	9.48998e-32	0.611	0.466	8
LPCAT1	0.282632	7.59067e-36	2.55912e-31	0.316	0.158	8
ADD3	0.309397	7.71654e-36	2.60155e-31	0.427	0.248	8
RAB29	0.302434	1.55396e-34	5.23901e-30	0.378	0.212	8
MBP	0.292732	2.04696e-34	6.90111e-30	0.557	0.364	8
LINC00861	0.290724	9.03094e-33	3.04469e-28	0.341	0.182	8
SUN2	0.335461	2.34019e-32	7.88973e-28	0.655	0.513	8
ARL4C	0.359886	2.51203e-32	8.46905e-28	0.732	0.603	8
ACTB	0.28207	2.6414e-32	8.90522e-28	0.997	0.964	8
SRPK2	0.270386	5.26253e-32	1.77421e-27	0.412	0.242	8
CAPN2	0.285479	7.68191e-32	2.58988e-27	0.542	0.36	8
TSPAN32	0.269517	1.11752e-31	3.76759e-27	0.271	0.133	8
MYL12A	0.25575	2.54234e-31	8.57125e-27	0.914	0.824	8
S1PR4	0.316479	1.02984e-30	3.47201e-26	0.404	0.243	8
ANXA6	0.307268	1.95041e-30	6.57561e-26	0.64	0.483	8
GNG2	0.276443	3.82991e-30	1.29122e-25	0.614	0.437	8
CYTH1	0.283448	1.35746e-29	4.57652e-25	0.479	0.315	8
PTPN4	0.299189	2.02207e-29	6.81722e-25	0.418	0.257	8
RASSF1	0.259061	5.28391e-29	1.78142e-24	0.463	0.293	8
CDC42SE1	0.297219	2.65154e-28	8.9394e-24	0.543	0.382	8
PRKCB	0.271307	1.52093e-27	5.12767e-23	0.439	0.282	8
TMBIM1	0.274653	3.33722e-27	1.12511e-22	0.327	0.187	8
CDC42EP3	0.26041	5.539e-27	1.86742e-22	0.392	0.239	8
PPP1CA	0.25111	1.95687e-25	6.59739e-21	0.73	0.563	8
ITGAL	0.253644	1.97153e-25	6.64681e-21	0.489	0.333	8
IQGAP2	0.259233	1.7978e-24	6.06111e-20	0.428	0.278	8
PRMT2	0.268572	1.54237e-23	5.19994e-19	0.525	0.385	8
PYHIN1	0.256897	4.402e-23	1.48409e-18	0.404	0.257	8
GADD45B	0.264123	6.62184e-21	2.23249e-16	0.6	0.45	8
TRGC2	0.321264	1.59409e-19	5.3743e-15	0.325	0.199	8
GTF3C1	0.250245	5.24773e-19	1.76922e-14	0.276	0.166	8
XCL2	0.293062	6.15922e-18	2.07652e-13	0.311	0.183	8
KLRB1	2.29102	0	0	0.938	0.154	9
TRAV1-2	1.16092	0	0	0.408	0.027	9
CCR6	0.919486	0	0	0.372	0.011	9
SLC4A10	0.830017	0	0	0.405	0.002	9
ZBTB16	0.779341	0	0	0.367	0.018	9
IL4I1	0.757129	0	0	0.293	0.004	9
LTK	0.562081	0	0	0.274	0.003	9
NCR3	1.12364	3.20377e-247	1.08012e-242	0.552	0.072	9
TLE1	0.591168	2.0101e-207	6.77685e-203	0.285	0.02	9
CEBPD	1.40456	1.35327e-199	4.56241e-195	0.573	0.097	9
TMIGD2	0.824916	1.56682e-190	5.28237e-186	0.416	0.05	9
LST1	0.74049	3.07497e-188	1.03669e-183	0.345	0.034	9
IL7R	1.30901	2.41956e-139	8.1573e-135	0.845	0.292	9
AQP3	1.01404	6.57237e-134	2.21581e-129	0.565	0.137	9
LTB	1.48142	1.51612e-127	5.11144e-123	0.878	0.379	9
DPP4	0.492046	4.4467e-100	1.49916e-95	0.304	0.048	9
RORA	0.888112	2.54477e-88	8.57945e-84	0.723	0.289	9
NFKBIA	1.04323	4.06666e-66	1.37103e-61	0.861	0.588	9
CD83	0.801108	5.70391e-65	1.92302e-60	0.34	0.086	9
TNFRSF25	0.604237	2.14838e-64	7.24305e-60	0.367	0.101	9
SPOCK2	0.758034	4.5549e-62	1.53564e-57	0.788	0.462	9
IFNGR1	0.608469	1.24724e-61	4.20495e-57	0.465	0.154	9
RPLP1	0.36439	4.93392e-60	1.66342e-55	1	0.974	9
RPLP0	0.495805	7.91818e-60	2.66954e-55	0.995	0.908	9
TPT1	0.441499	5.46807e-58	1.84351e-53	0.997	0.954	9
NRIP1	0.468446	4.84897e-56	1.63478e-51	0.253	0.056	9
PHACTR2	0.522833	1.54286e-54	5.20159e-50	0.383	0.119	9
EEF1A1	0.373479	4.41743e-53	1.48929e-48	1	0.974	9
S100A4	0.537093	2.73522e-50	9.22152e-46	0.986	0.775	9
SLAMF1	0.378258	5.86459e-45	1.97719e-40	0.272	0.073	9
FURIN	0.384204	4.76394e-44	1.60611e-39	0.261	0.07	9
ERN1	0.639321	5.05866e-41	1.70548e-36	0.465	0.201	9
CERK	0.483602	1.86226e-40	6.27844e-36	0.391	0.152	9
RPS13	0.312225	7.11665e-39	2.39931e-34	0.997	0.93	9
RPL32	0.277475	2.15085e-38	7.25136e-34	0.997	0.956	9
KDM6B	0.59389	3.34235e-38	1.12684e-33	0.465	0.206	9
SATB1	0.49045	2.71618e-37	9.15732e-33	0.413	0.167	9
JAML	0.427036	2.69688e-34	9.09225e-30	0.495	0.228	9
FKBP11	0.446437	1.29129e-33	4.35347e-29	0.503	0.244	9
ZC3H12A	0.549631	3.08161e-33	1.03894e-28	0.438	0.199	9
RPL10	0.285473	2.23243e-32	7.52641e-28	1	0.975	9
MYBL1	0.346269	6.24481e-32	2.10538e-27	0.288	0.098	9
FLT3LG	0.488588	6.67764e-32	2.2513e-27	0.492	0.247	9
RPL13	0.293572	1.36854e-31	4.61391e-27	0.997	0.97	9
RPL8	0.308655	7.63014e-31	2.57242e-26	0.997	0.938	9
BTG1	0.416432	8.82848e-30	2.97643e-25	0.995	0.938	9
PFKFB3	0.456678	1.23157e-29	4.15212e-25	0.38	0.163	9
KLRG1	0.448729	1.25582e-29	4.23389e-25	0.508	0.251	9
RPL3	0.344294	2.66971e-29	9.00065e-25	1	0.944	9
GPR65	0.545874	2.86644e-29	9.66391e-25	0.511	0.27	9
RPS4X	0.327052	3.72652e-29	1.25636e-24	0.997	0.943	9
PER1	0.555359	5.22115e-29	1.76026e-24	0.435	0.216	9
RPL34	0.270573	8.62587e-29	2.90813e-24	0.995	0.95	9
PERP	0.332682	2.32529e-28	7.83949e-24	0.312	0.119	9
RPS3A	0.282966	1.39843e-26	4.71466e-22	0.997	0.945	9
AC020916.1	0.476612	1.55073e-26	5.22812e-22	0.541	0.297	9
CD69	0.670391	1.57952e-26	5.3252e-22	0.848	0.688	9
CDKN1A	0.530701	1.6276e-26	5.48729e-22	0.321	0.133	9
DUSP1	0.665752	2.76436e-26	9.31977e-22	0.872	0.703	9
RPL5	0.295181	3.8482e-26	1.29738e-21	0.986	0.904	9
PRNP	0.389355	4.41432e-25	1.48824e-20	0.484	0.26	9
PNP	0.548963	8.89741e-25	2.99967e-20	0.421	0.219	9
NINJ1	0.471712	1.42741e-24	4.81236e-20	0.353	0.163	9
FTH1	0.449604	2.19076e-24	7.38592e-20	0.992	0.947	9
PABPC1	0.400178	2.51419e-24	8.47634e-20	0.932	0.803	9
TC2N	0.406465	2.86427e-24	9.65659e-20	0.535	0.303	9
TNFAIP3	0.589429	5.14399e-24	1.73424e-19	0.875	0.709	9
RPS5	0.257403	2.06782e-23	6.97146e-19	0.984	0.91	9
ADRB2	0.343433	3.32481e-23	1.12093e-18	0.277	0.11	9
REL	0.48209	3.80036e-22	1.28125e-17	0.601	0.386	9
EEF1B2	0.298172	5.52201e-22	1.86169e-17	0.946	0.81	9
RPL6	0.268479	7.86832e-22	2.65273e-17	0.992	0.933	9
RPL4	0.332293	1.55276e-21	5.23496e-17	0.962	0.843	9
RUNX2	0.268161	4.32464e-21	1.45801e-16	0.261	0.106	9
CXCR4	0.372263	1.61083e-20	5.43076e-16	0.946	0.824	9
LMNA	0.545259	3.07508e-20	1.03673e-15	0.457	0.251	9
ARL4A	0.380398	3.38808e-20	1.14226e-15	0.435	0.239	9
PRR5	0.335866	4.4987e-20	1.51669e-15	0.342	0.167	9
RARA	0.338832	5.18217e-20	1.74712e-15	0.296	0.134	9
PBXIP1	0.389609	9.29341e-20	3.13318e-15	0.511	0.317	9
RPS6	0.291496	9.41364e-20	3.17372e-15	0.995	0.948	9
EEF1G	0.410862	1.29133e-19	4.3536e-15	0.951	0.83	9
IVNS1ABP	0.344119	2.04711e-19	6.90163e-15	0.511	0.309	9
BTG2	0.454204	2.65762e-19	8.95991e-15	0.739	0.549	9
FOSB	0.608189	1.67557e-18	5.649e-14	0.647	0.471	9
RPL17	0.320766	2.94065e-18	9.9141e-14	0.989	0.935	9
S100A6	0.258606	6.04777e-18	2.03894e-13	0.962	0.847	9
ZFP36	0.576617	6.10581e-18	2.05851e-13	0.875	0.762	9
ODF2L	0.34649	6.96593e-18	2.34849e-13	0.41	0.225	9
MYADM	0.682341	7.29657e-18	2.45997e-13	0.606	0.444	9
NFKB1	0.501935	1.11709e-17	3.76616e-13	0.47	0.292	9
PDCD4	0.328609	1.55411e-17	5.23953e-13	0.641	0.45	9
INTS6	0.418273	4.24734e-17	1.43195e-12	0.413	0.241	9
CCDC107	0.364857	4.59985e-17	1.55079e-12	0.486	0.306	9
EEF2	0.25918	6.33381e-17	2.13538e-12	0.921	0.801	9
PIM1	0.455545	6.78054e-17	2.28599e-12	0.47	0.284	9
NFE2L2	0.329893	1.0434e-16	3.51773e-12	0.438	0.254	9
IER5	0.413107	1.28545e-16	4.33378e-12	0.484	0.312	9
GTF3C1	0.314234	1.82195e-16	6.14253e-12	0.326	0.169	9
CAMK4	0.297775	2.3228e-16	7.83109e-12	0.443	0.256	9
NR1D2	0.269223	2.88063e-16	9.71175e-12	0.342	0.18	9
SNHG16	0.379347	3.34881e-16	1.12902e-11	0.454	0.283	9
MAFF	0.329214	4.57528e-16	1.54251e-11	0.293	0.144	9
OSTF1	0.315494	1.2635e-15	4.25977e-11	0.56	0.374	9
GYG1	0.304043	1.51723e-15	5.11517e-11	0.443	0.262	9
YWHAQ	0.323931	1.89909e-15	6.40258e-11	0.641	0.47	9
TTC39C	0.31778	2.12515e-15	7.16473e-11	0.467	0.288	9
NFKBIZ	0.490227	4.76942e-15	1.60796e-10	0.467	0.308	9
TNF	0.258144	5.39532e-15	1.81898e-10	0.326	0.165	9
STAT4	0.318823	5.59878e-15	1.88757e-10	0.497	0.312	9
NFKB2	0.343685	5.75472e-15	1.94015e-10	0.342	0.192	9
AL138963.4	0.394872	5.79601e-15	1.95407e-10	0.465	0.287	9
TAGLN2	0.365564	5.84567e-15	1.97081e-10	0.739	0.599	9
NXT1	0.310417	5.95698e-15	2.00834e-10	0.416	0.247	9
FOS	0.591022	1.22025e-14	4.11397e-10	0.723	0.605	9
SQSTM1	0.401841	1.42962e-14	4.81981e-10	0.639	0.491	9
BIRC3	0.45004	1.63371e-14	5.50789e-10	0.476	0.3	9
CCNH	0.328237	1.91019e-14	6.44e-10	0.557	0.383	9
ZFP36L2	0.274002	2.43584e-14	8.21219e-10	0.938	0.832	9
SERP1	0.279179	2.8203e-14	9.50835e-10	0.739	0.588	9
SPTY2D1	0.276991	7.52827e-14	2.53808e-09	0.296	0.155	9
TGFB1	0.355433	7.41384e-13	2.4995e-08	0.668	0.55	9
CD55	0.251214	8.38451e-13	2.82675e-08	0.44	0.27	9
PPP1R15A	0.54118	1.73387e-12	5.84557e-08	0.658	0.568	9
MTFP1	0.320944	1.98541e-12	6.69361e-08	0.299	0.166	9
ZFP36L1	0.36244	2.02243e-12	6.81844e-08	0.736	0.585	9
JUNB	0.294696	2.17302e-12	7.32613e-08	0.91	0.809	9
GPR171	0.299288	2.43605e-12	8.21291e-08	0.31	0.172	9
EML4	0.252581	5.62248e-12	1.89556e-07	0.625	0.475	9
RBMS1	0.256445	8.02207e-12	2.70456e-07	0.486	0.335	9
XBP1	0.330151	1.209e-11	4.07603e-07	0.495	0.349	9
CSRNP1	0.389962	1.38632e-11	4.67383e-07	0.549	0.41	9
MGAT4A	0.26644	2.94963e-11	9.94437e-07	0.438	0.291	9
CTSA	0.251866	3.38675e-11	1.14181e-06	0.435	0.288	9
ZFAND5	0.2875	4.3266e-11	1.45867e-06	0.497	0.342	9
PARP8	0.271353	1.08224e-10	3.64866e-06	0.522	0.391	9
PDE4D	0.295756	1.95987e-10	6.60752e-06	0.443	0.303	9
SLC2A3	0.280856	2.22759e-10	7.51011e-06	0.633	0.481	9
GPR183	0.257993	2.77009e-10	9.33909e-06	0.351	0.209	9
SMAD7	0.259898	3.84752e-10	1.29715e-05	0.492	0.346	9
EIF3E	0.272035	6.0493e-10	2.03946e-05	0.712	0.552	9
PPP1R15B	0.257769	1.62048e-09	5.46329e-05	0.285	0.173	9
DDIT4	0.311094	2.16565e-09	7.30127e-05	0.63	0.483	9
SLC7A5	0.319889	4.07701e-09	0.000137452	0.514	0.384	9
GADD45B	0.278391	4.4187e-09	0.000148972	0.609	0.455	9
AREG	0.271121	1.02468e-08	0.000345459	0.261	0.153	9
HSPA8	0.38607	1.74833e-08	0.000589433	0.916	0.828	9
TNFAIP8	0.25577	2.78928e-08	0.000940379	0.448	0.326	9
G3BP2	0.252714	2.99438e-08	0.00100953	0.571	0.451	9
DNAJA1	0.374186	5.75472e-08	0.00194015	0.715	0.607	9
PHLDA1	0.336517	8.47199e-08	0.00285625	0.351	0.239	9
PIM3	0.306765	2.48097e-07	0.00836433	0.41	0.304	9
IFIT1	1.49598	0	0	0.628	0.044	10
CMPK2	1.14684	0	0	0.608	0.062	10
RSAD2	1.34008	1.44614e-302	4.87551e-298	0.587	0.062	10
IFIT3	1.42543	1.312e-279	4.42327e-275	0.546	0.058	10
OAS1	1.2353	4.04382e-224	1.36333e-219	0.646	0.106	10
LAMP3	0.521412	1.97008e-209	6.64191e-205	0.26	0.015	10
USP18	0.960594	2.88532e-207	9.72758e-203	0.531	0.074	10
IFI44L	1.24966	1.49912e-203	5.05414e-199	0.758	0.157	10
MX1	1.69623	1.63632e-188	5.5167e-184	0.841	0.253	10
OAS3	1.04321	2.5936e-186	8.74407e-182	0.552	0.09	10
IFI6	1.74979	9.9922e-172	3.36877e-167	0.903	0.362	10
ISG15	1.81875	4.72691e-171	1.59363e-166	0.95	0.448	10
IFIT2	1.24625	4.70567e-165	1.58647e-160	0.395	0.05	10
MX2	1.09703	1.93936e-163	6.53836e-159	0.625	0.133	10
HERC5	1.16338	1.48302e-145	4.99985e-141	0.552	0.114	10
EIF2AK2	1.12793	3.54867e-134	1.1964e-129	0.732	0.227	10
EPSTI1	1.1292	1.41764e-133	4.77943e-129	0.717	0.21	10
IFI44	0.851671	5.69409e-132	1.91971e-127	0.566	0.124	10
ISG20	1.28504	7.66351e-129	2.58368e-124	0.938	0.556	10
IRF7	1.12329	2.16803e-128	7.30929e-124	0.761	0.268	10
XAF1	1.11105	4.41579e-120	1.48874e-115	0.785	0.301	10
LY6E	1.07484	1.81202e-117	6.10905e-113	0.965	0.664	10
IFI35	1.04381	5.93662e-117	2.00147e-112	0.714	0.233	10
PLSCR1	1.10583	9.62895e-117	3.24631e-112	0.649	0.195	10
SAMD9L	1.0208	3.32968e-110	1.12257e-105	0.67	0.212	10
CD38	1.03283	1.00624e-98	3.39244e-94	0.549	0.152	10
LGALS9	0.798963	4.05867e-95	1.36834e-90	0.478	0.118	10
OAS2	0.798375	2.11095e-93	7.11687e-89	0.531	0.149	10
SAMD9	0.877992	6.25819e-93	2.10989e-88	0.628	0.205	10
STAT1	1.10362	5.22805e-91	1.76259e-86	0.77	0.357	10
BST2	0.939467	1.80441e-89	6.08338e-85	0.832	0.431	10
OASL	1.07015	2.99867e-86	1.01097e-81	0.72	0.299	10
MT2A	0.959798	5.06851e-84	1.7088e-79	0.847	0.451	10
PALM2-AKAP2	0.615842	2.27407e-81	7.66681e-77	0.351	0.072	10
PARP9	0.780815	1.53255e-80	5.16685e-76	0.543	0.173	10
IFIT5	0.539707	1.36907e-79	4.61568e-75	0.33	0.066	10
TNFSF10	0.923927	4.07409e-75	1.37354e-70	0.522	0.167	10
STAT2	0.677488	9.55559e-75	3.22157e-70	0.422	0.112	10
HELZ2	0.66417	2.92903e-74	9.87492e-70	0.434	0.114	10
UBE2L6	0.881861	5.03153e-74	1.69633e-69	0.782	0.417	10
DDX60	0.631942	2.03552e-69	6.86255e-65	0.454	0.132	10
TRIM22	0.867393	2.30035e-69	7.7554e-65	0.752	0.389	10
DRAP1	0.741752	6.40767e-67	2.16028e-62	0.861	0.579	10
LAP3	0.725379	4.85217e-66	1.63586e-61	0.528	0.184	10
SP100	0.702451	3.95463e-62	1.33326e-57	0.811	0.487	10
IFI16	0.792952	4.67224e-62	1.5752e-57	0.732	0.379	10
GBP1	0.794665	3.92335e-58	1.32272e-53	0.549	0.219	10
IFIH1	0.609803	8.24145e-58	2.77852e-53	0.345	0.092	10
IFITM1	1.10151	1.38189e-56	4.65889e-52	0.867	0.655	10
NT5C3A	0.74718	4.94984e-56	1.66879e-51	0.501	0.188	10
SP110	0.737898	3.3965e-55	1.14509e-50	0.702	0.369	10
ZBP1	0.640284	6.01561e-55	2.0281e-50	0.472	0.164	10
LAG3	0.780994	1.37493e-50	4.63542e-46	0.776	0.442	10
PNPT1	0.49485	2.92146e-50	9.84941e-46	0.322	0.089	10
NMI	0.575187	1.13612e-48	3.83032e-44	0.448	0.162	10
RNF213	0.612104	2.76832e-48	9.33311e-44	0.861	0.613	10
PSMB9	0.590451	1.708e-47	5.75834e-43	0.894	0.693	10
SHFL	0.654305	1.61902e-46	5.45836e-42	0.661	0.354	10
SPATS2L	0.565748	1.67195e-46	5.63682e-42	0.413	0.143	10
PARP12	0.57411	6.56556e-46	2.21351e-41	0.401	0.139	10
PARP14	0.642322	1.16761e-45	3.93648e-41	0.484	0.194	10
DDX60L	0.543492	5.91866e-45	1.99542e-40	0.354	0.114	10
TYMP	0.624304	1.44719e-44	4.87905e-40	0.625	0.288	10
HSH2D	0.492777	3.30282e-44	1.11351e-39	0.401	0.14	10
ADAR	0.583739	1.17281e-43	3.95402e-39	0.743	0.447	10
TAP1	0.621134	1.10523e-42	3.72617e-38	0.746	0.47	10
PHF11	0.57233	3.79952e-42	1.28097e-37	0.546	0.253	10
DDX58	0.564866	4.45459e-41	1.50182e-36	0.342	0.115	10
HLA-A	0.347732	2.09071e-38	7.04862e-34	1	0.975	10
DTX3L	0.469937	1.76669e-37	5.95623e-33	0.351	0.125	10
TRIM25	0.350496	3.03018e-37	1.02159e-32	0.268	0.078	10
PPM1K	0.596784	5.6274e-37	1.89722e-32	0.531	0.257	10
PLAAT4	0.554851	2.91461e-36	9.82631e-32	0.888	0.714	10
IRF9	0.528314	5.23231e-36	1.76402e-31	0.696	0.4	10
TRAFD1	0.426702	5.89066e-36	1.98598e-31	0.339	0.119	10
GBP4	0.631289	1.73474e-35	5.8485e-31	0.451	0.203	10
PML	0.503804	3.35901e-35	1.13246e-30	0.392	0.158	10
SHISA5	0.542479	6.84824e-34	2.30881e-29	0.69	0.422	10
RBCK1	0.497719	2.20767e-33	7.44294e-29	0.625	0.35	10
NUB1	0.480651	2.24632e-33	7.57324e-29	0.475	0.223	10
PARP10	0.605507	9.97718e-33	3.36371e-28	0.504	0.256	10
C5orf56	0.553271	3.21465e-32	1.08379e-27	0.543	0.273	10
CARD16	0.545502	4.50758e-32	1.51968e-27	0.581	0.312	10
PSMB8	0.503724	1.11228e-31	3.74996e-27	0.788	0.546	10
TRIM21	0.335731	7.41761e-29	2.50077e-24	0.271	0.092	10
HLA-E	0.312149	8.32539e-29	2.80682e-24	0.988	0.932	10
HLA-DPA1	0.48731	6.67031e-28	2.24883e-23	0.832	0.621	10
CHST12	0.473447	8.36787e-28	2.82114e-23	0.649	0.395	10
N4BP1	0.48549	9.89476e-27	3.33592e-22	0.496	0.262	10
SAT1	0.624082	1.22493e-26	4.12974e-22	0.811	0.611	10
TMSB10	0.284918	3.91415e-26	1.31962e-21	0.994	0.956	10
ZCCHC2	0.384691	6.22192e-26	2.09766e-21	0.345	0.148	10
GZMK	0.526558	1.51317e-25	5.10149e-21	0.746	0.504	10
ECE1	0.334346	3.93295e-25	1.32596e-20	0.292	0.114	10
COX5A	0.533769	4.09967e-25	1.38216e-20	0.655	0.446	10
CCL5	0.348842	4.48369e-25	1.51163e-20	0.976	0.875	10
TRANK1	0.478076	8.60727e-25	2.90186e-20	0.354	0.158	10
COTL1	0.435761	8.65928e-25	2.91939e-20	0.867	0.652	10
PSME2	0.413355	2.54422e-24	8.57759e-20	0.817	0.634	10
XRN1	0.398828	2.74115e-24	9.24151e-20	0.472	0.248	10
ZNFX1	0.357993	9.55079e-24	3.21995e-19	0.407	0.195	10
CD74	0.503897	1.53459e-23	5.17372e-19	0.953	0.852	10
MYL12A	0.365074	1.81968e-23	6.13487e-19	0.947	0.827	10
PSMB10	0.391417	2.14555e-23	7.23352e-19	0.74	0.497	10
GNG5	0.40116	3.37677e-23	1.13845e-18	0.676	0.438	10
PSME1	0.341309	4.47351e-23	1.5082e-18	0.882	0.748	10
CLDND1	0.528046	2.60197e-22	8.77229e-18	0.566	0.337	10
TAP2	0.475132	5.4759e-22	1.84615e-17	0.546	0.339	10
ACP5	0.341069	5.55819e-22	1.87389e-17	0.407	0.193	10
FBXO6	0.290494	4.75615e-21	1.60349e-16	0.271	0.109	10
NAPA	0.41124	6.50788e-21	2.19407e-16	0.519	0.318	10
CHMP5	0.347128	9.00399e-21	3.03561e-16	0.425	0.217	10
GBP5	0.521087	2.49527e-20	8.41254e-16	0.572	0.373	10
CD2	0.32922	2.72226e-20	9.17783e-16	0.87	0.714	10
CXCL13	0.779054	4.88849e-20	1.6481e-15	0.28	0.118	10
CASP1	0.373407	5.93556e-20	2.00112e-15	0.431	0.229	10
HLA-DRA	0.426951	6.19646e-20	2.08907e-15	0.708	0.472	10
IFITM3	0.485743	7.02708e-20	2.36911e-15	0.563	0.363	10
TBC1D1	0.30739	8.86263e-20	2.98795e-15	0.372	0.183	10
CD164	0.419522	1.08287e-19	3.6508e-15	0.628	0.427	10
IRF2	0.364404	1.12821e-19	3.80363e-15	0.481	0.274	10
RGS1	0.430236	2.30712e-19	7.77823e-15	0.749	0.53	10
APOL6	0.401111	2.7619e-19	9.31148e-15	0.463	0.264	10
SP140	0.341159	3.39182e-19	1.14352e-14	0.41	0.215	10
SLA2	0.31336	3.54469e-19	1.19506e-14	0.499	0.279	10
DYNLT1	0.339054	4.08463e-19	1.37709e-14	0.381	0.191	10
CTSS	0.369278	4.51125e-19	1.52092e-14	0.493	0.289	10
PTMS	0.422431	4.59779e-19	1.5501e-14	0.558	0.334	10
SMCHD1	0.412302	6.19244e-19	2.08772e-14	0.684	0.493	10
HLA-DRB1	0.348543	8.83377e-19	2.97822e-14	0.826	0.615	10
GSDMD	0.337276	3.27642e-18	1.10461e-13	0.493	0.29	10
HAVCR2	0.426593	4.19428e-18	1.41406e-13	0.36	0.177	10
CD8A	0.385373	5.46627e-18	1.8429e-13	0.87	0.715	10
HLA-DQA1	0.410792	2.42258e-17	8.1675e-13	0.481	0.278	10
CALCOCO2	0.3555	3.18665e-17	1.07435e-12	0.448	0.261	10
SQOR	0.322703	4.66629e-17	1.57319e-12	0.345	0.175	10
EVL	0.257217	4.90504e-17	1.65369e-12	0.909	0.753	10
HEXD	0.251487	6.27257e-17	2.11473e-12	0.327	0.159	10
HLA-DPB1	0.349494	1.20066e-16	4.04791e-12	0.832	0.674	10
IFITM2	0.424396	1.29137e-16	4.35372e-12	0.841	0.728	10
TRIM38	0.317811	1.53703e-16	5.18195e-12	0.336	0.172	10
GIMAP7	0.355864	2.40719e-16	8.11559e-12	0.67	0.469	10
PMAIP1	0.621067	2.58942e-16	8.72998e-12	0.51	0.326	10
SUSD3	0.297832	2.83415e-16	9.55507e-12	0.304	0.146	10
APOBEC3G	0.336743	3.01942e-16	1.01797e-11	0.732	0.515	10
TANK	0.366464	7.63372e-16	2.57363e-11	0.44	0.26	10
HLA-DRB5	0.40104	1.48842e-15	5.01805e-11	0.543	0.345	10
PSMA2	0.320888	1.8571e-15	6.26102e-11	0.614	0.411	10
ELF1	0.310798	2.93911e-15	9.90893e-11	0.746	0.565	10
CLEC2B	0.371899	5.91948e-15	1.99569e-10	0.717	0.541	10
PSMA5	0.339896	6.54164e-15	2.20545e-10	0.546	0.362	10
EHD4	0.254606	7.86934e-15	2.65307e-10	0.28	0.134	10
CD27	0.390806	1.50291e-14	5.06692e-10	0.599	0.423	10
GIMAP4	0.412248	1.57863e-14	5.3222e-10	0.617	0.439	10
MYD88	0.279332	3.90327e-14	1.31595e-09	0.313	0.166	10
SUB1	0.31084	4.69305e-14	1.58222e-09	0.855	0.742	10
CD48	0.30102	5.37979e-14	1.81374e-09	0.791	0.644	10
GPBP1	0.317283	5.64415e-14	1.90287e-09	0.599	0.416	10
USP15	0.284321	5.86437e-14	1.97712e-09	0.566	0.389	10
LYSMD2	0.284492	6.22635e-14	2.09915e-09	0.389	0.222	10
SLFN5	0.32432	6.66578e-14	2.2473e-09	0.534	0.351	10
SEM1	0.290733	1.17426e-13	3.9589e-09	0.625	0.438	10
LYST	0.27808	1.21674e-13	4.10211e-09	0.525	0.336	10
GBP2	0.331891	4.13077e-13	1.39265e-08	0.484	0.312	10
SETX	0.27849	5.70713e-13	1.9241e-08	0.422	0.255	10
PPP1CC	0.302488	1.68124e-12	5.66814e-08	0.516	0.351	10
PRKD2	0.2657	1.72473e-12	5.81477e-08	0.351	0.202	10
OGFR	0.270691	2.4152e-12	8.14261e-08	0.41	0.258	10
CD81	0.356318	3.7245e-12	1.25568e-07	0.673	0.522	10
IDH2	0.257837	5.01527e-12	1.69085e-07	0.566	0.389	10
RESF1	0.309485	5.88969e-12	1.98565e-07	0.637	0.469	10
ODF2L	0.26199	6.26231e-12	2.11127e-07	0.381	0.226	10
CD8B	0.275129	6.41359e-12	2.16228e-07	0.808	0.618	10
PDCD1	0.299061	1.10212e-11	3.71568e-07	0.342	0.193	10
FASLG	0.273309	1.10741e-11	3.73352e-07	0.31	0.169	10
APOBEC3H	0.260069	1.29992e-11	4.38255e-07	0.271	0.142	10
RNF149	0.25914	6.19886e-11	2.08988e-06	0.552	0.395	10
SCAMP2	0.270538	1.01288e-10	3.41483e-06	0.466	0.315	10
ITM2C	0.308569	1.1363e-10	3.83091e-06	0.507	0.349	10
CAPN2	0.266439	1.87238e-10	6.31254e-06	0.522	0.368	10
SYNGR2	0.281024	3.65171e-10	1.23114e-05	0.454	0.312	10
EOMES	0.278778	3.72614e-10	1.25623e-05	0.351	0.214	10
VAMP5	0.256475	4.52106e-10	1.52423e-05	0.451	0.305	10
KPNB1	0.275329	1.19907e-09	4.04253e-05	0.478	0.334	10
AC008875.3	0.278775	1.63182e-09	5.50152e-05	0.351	0.222	10
CCDC85B	0.253362	2.54677e-09	8.58619e-05	0.596	0.461	10
CXCR6	0.278017	2.67355e-09	9.01361e-05	0.336	0.199	10
TIGIT	0.301822	3.79242e-09	0.000127858	0.484	0.331	10
IFNG	0.268492	3.34564e-08	0.00112795	0.493	0.349	10
RBPJ	0.25768	8.49749e-08	0.00286484	0.419	0.283	10
CCL3	0.274402	2.41457e-07	0.00814047	0.386	0.255	10
TRDV2	2.32179	0	0	0.839	0.005	11
TRGV9	1.72312	0	0	0.831	0.048	11
IL12RB2	0.559479	5.46734e-246	1.84326e-241	0.373	0.02	11
TRDC	1.07715	9.14299e-236	3.08247e-231	0.686	0.072	11
KLRC1	0.804663	3.50192e-132	1.18064e-127	0.576	0.087	11
ZBTB16	0.417544	4.85509e-118	1.63684e-113	0.275	0.024	11
KLRB1	0.798635	3.76755e-114	1.27019e-109	0.763	0.165	11
IL18RAP	0.466761	1.23011e-95	4.1472e-91	0.347	0.045	11
TRGC1	0.58272	2.49463e-93	8.41039e-89	0.398	0.059	11
PLCB1	0.394369	8.10319e-90	2.73191e-85	0.343	0.047	11
KLRG1	0.819033	1.91014e-88	6.43986e-84	0.826	0.247	11
CEBPD	0.768056	1.21896e-83	4.1096e-79	0.5	0.103	11
IL7R	0.949755	1.46141e-66	4.92698e-62	0.805	0.298	11
SATB1	0.649594	1.29122e-65	4.35321e-61	0.593	0.166	11
CYB561	0.322572	5.4737e-63	1.8454e-58	0.275	0.042	11
PHACTR2	0.532138	1.01527e-58	3.4229e-54	0.475	0.12	11
S1PR1	0.596515	4.88171e-58	1.64582e-53	0.525	0.144	11
TGFBR3	0.465557	1.29763e-57	4.37484e-53	0.487	0.122	11
DPP4	0.343748	2.2064e-51	7.43866e-47	0.28	0.051	11
KLRD1	0.572573	9.68272e-50	3.26443e-45	0.814	0.308	11
TNF	0.636573	8.27575e-49	2.79009e-44	0.534	0.163	11
BHLHE40	0.853716	1.05732e-48	3.56465e-44	0.775	0.382	11
RORA	0.563623	1.96086e-48	6.61085e-44	0.746	0.293	11
TGFB1	0.750831	1.49395e-47	5.03671e-43	0.894	0.547	11
NFKBIA	0.939813	3.97543e-46	1.34028e-41	0.898	0.59	11
EEF1A1	0.405154	4.58957e-46	1.54733e-41	1	0.975	11
AUTS2	0.430972	2.2611e-45	7.62308e-41	0.564	0.177	11
MYBL1	0.406569	3.36686e-43	1.1351e-38	0.381	0.098	11
CD300A	0.342322	8.99626e-43	3.033e-38	0.335	0.079	11
DUSP2	0.684707	2.76192e-42	9.31155e-38	0.97	0.734	11
GADD45B	0.761745	4.92788e-42	1.66138e-37	0.826	0.453	11
ZFP36	0.77509	1.13111e-41	3.81342e-37	0.97	0.762	11
EFHD2	0.564756	2.35437e-39	7.93752e-35	0.797	0.413	11
NSG1	0.366941	1.12415e-38	3.78994e-34	0.297	0.07	11
KLF3	0.504788	2.52908e-38	8.52653e-34	0.5	0.172	11
NCR3	0.346223	3.53501e-38	1.19179e-33	0.326	0.081	11
SPOCK2	0.541308	8.12665e-36	2.73982e-31	0.835	0.464	11
TBX21	0.372587	3.45017e-35	1.16319e-30	0.53	0.186	11
PLEK	0.363882	5.63255e-35	1.89896e-30	0.551	0.194	11
AL138963.4	0.543304	4.7095e-34	1.58776e-29	0.653	0.286	11
NPDC1	0.278748	3.63499e-33	1.2255e-28	0.284	0.072	11
IFNGR1	0.357056	6.8586e-33	2.31231e-28	0.47	0.157	11
ERN1	0.455073	9.85916e-33	3.32392e-28	0.521	0.203	11
P2RY8	0.373535	2.18023e-32	7.35042e-28	0.576	0.229	11
MAFF	0.438653	2.30283e-31	7.76376e-27	0.419	0.144	11
ZC3H12A	0.498922	2.97785e-31	1.00395e-26	0.504	0.2	11
FOS	0.799927	3.6124e-31	1.21788e-26	0.873	0.603	11
CSRNP1	0.537111	5.88572e-31	1.98431e-26	0.771	0.408	11
FOSL2	0.517348	8.16701e-31	2.75343e-26	0.593	0.26	11
TNFAIP3	0.648394	1.10614e-30	3.72925e-26	0.915	0.71	11
KLF10	0.462573	1.11068e-30	3.74453e-26	0.462	0.175	11
XCL1	0.353099	1.4199e-30	4.78704e-26	0.394	0.125	11
TPT1	0.353543	5.22785e-30	1.76252e-25	1	0.954	11
RPS21	0.351906	7.38708e-30	2.49048e-25	1	0.904	11
RPLP0	0.375437	2.28711e-29	7.71075e-25	1	0.909	11
MATK	0.361931	6.05713e-29	2.0421e-24	0.653	0.289	11
RPS12	0.287896	1.50174e-28	5.06297e-24	1	0.963	11
SMAD7	0.472635	1.55697e-28	5.24915e-24	0.682	0.344	11
ZFP36L2	0.498731	1.04101e-27	3.50965e-23	0.983	0.832	11
SLC7A5	0.51529	3.19835e-27	1.07829e-22	0.712	0.382	11
MAP3K8	0.319285	1.2694e-26	4.27964e-22	0.483	0.19	11
ETV3	0.303255	2.53145e-26	8.53453e-22	0.318	0.1	11
TSC22D2	0.360965	7.54141e-26	2.54251e-21	0.466	0.186	11
ADRB2	0.322465	1.2258e-25	4.13265e-21	0.339	0.111	11
RARA	0.300894	1.69542e-25	5.71594e-21	0.377	0.134	11
AL133415.1	0.405717	1.99259e-25	6.71783e-21	0.436	0.174	11
FLT3LG	0.360487	3.02069e-25	1.0184e-20	0.564	0.249	11
CERK	0.291674	3.17921e-25	1.07184e-20	0.411	0.154	11
NR4A3	0.420248	4.96612e-25	1.67428e-20	0.525	0.228	11
RPS8	0.27005	5.56774e-25	1.87711e-20	0.996	0.949	11
AHNAK	0.452121	1.24268e-24	4.18958e-20	0.839	0.502	11
SH3BP5	0.272119	1.24675e-24	4.2033e-20	0.386	0.138	11
ARL4C	0.500675	1.81188e-24	6.10856e-20	0.86	0.607	11
PTGER4	0.472015	5.70476e-24	1.9233e-19	0.729	0.402	11
MT-ND4L	0.355031	8.91378e-24	3.00519e-19	0.919	0.649	11
MIDN	0.40643	1.05595e-23	3.56002e-19	0.691	0.369	11
PBX4	0.250484	2.47645e-23	8.34911e-19	0.288	0.091	11
SNHG16	0.424096	2.57975e-23	8.69738e-19	0.585	0.282	11
IER2	0.454872	4.31937e-23	1.45623e-18	0.928	0.656	11
BTG2	0.53912	4.75388e-23	1.60272e-18	0.818	0.549	11
CD83	0.283219	4.98934e-23	1.68211e-18	0.284	0.09	11
CASK	0.285167	9.2904e-23	3.13217e-18	0.398	0.154	11
FLI1	0.310962	1.00408e-22	3.38516e-18	0.487	0.208	11
HLA-B	0.319598	1.31896e-22	4.44675e-18	1	0.977	11
XBP1	0.387427	2.89123e-22	9.7475e-18	0.669	0.347	11
RPS28	0.271721	5.20226e-22	1.75389e-17	1	0.943	11
NFE2L2	0.405654	5.23996e-22	1.7666e-17	0.534	0.254	11
JUNB	0.446159	6.15912e-22	2.07648e-17	0.979	0.808	11
RIPOR2	0.370308	7.47899e-22	2.52147e-17	0.602	0.295	11
SELL	0.394947	7.96656e-22	2.68585e-17	0.407	0.161	11
PIM1	0.350301	1.22229e-21	4.12083e-17	0.589	0.284	11
NR4A2	0.551572	1.81427e-21	6.11664e-17	0.877	0.612	11
EEF1B2	0.324448	4.25608e-21	1.4349e-16	0.962	0.811	11
B3GNT2	0.386828	1.53455e-20	5.17359e-16	0.547	0.271	11
KLF2	0.402082	2.43545e-20	8.21087e-16	0.695	0.368	11
FAM117A	0.283267	3.39734e-20	1.14538e-15	0.386	0.158	11
IER5	0.380639	1.63104e-19	5.4989e-15	0.589	0.311	11
FLNA	0.309792	5.64102e-19	1.90181e-14	0.805	0.511	11
CDK17	0.29303	8.94361e-19	3.01525e-14	0.585	0.3	11
LDHA	0.415051	1.57424e-18	5.30739e-14	0.886	0.696	11
TC2N	0.284946	3.21927e-18	1.08535e-13	0.597	0.304	11
PRNP	0.295984	3.27511e-18	1.10417e-13	0.53	0.262	11
AL135905.2	0.277337	3.9964e-18	1.34735e-13	0.394	0.169	11
PMEPA1	0.327892	4.18548e-18	1.41109e-13	0.411	0.181	11
CNN2	0.367833	6.02056e-18	2.02977e-13	0.792	0.515	11
SOCS3	0.368959	8.3856e-18	2.82712e-13	0.458	0.219	11
PDCD4	0.300881	8.82531e-18	2.97537e-13	0.767	0.45	11
NFKB1	0.349679	9.11022e-18	3.07142e-13	0.559	0.292	11
PABPC1	0.300107	9.20019e-18	3.10175e-13	0.941	0.804	11
ADD3	0.266153	1.52811e-17	5.15186e-13	0.517	0.256	11
CD247	0.350923	1.58464e-17	5.34245e-13	0.771	0.498	11
EEF2	0.293551	1.89088e-17	6.3749e-13	0.953	0.802	11
TENT5C	0.316531	2.75603e-17	9.29169e-13	0.691	0.383	11
PDE4B	0.269201	6.96852e-17	2.34937e-12	0.593	0.308	11
DUSP1	0.455187	7.02435e-17	2.36819e-12	0.941	0.703	11
AC007384.1	0.303893	8.18128e-17	2.75824e-12	0.28	0.106	11
PHF3	0.253089	1.02351e-16	3.45066e-12	0.61	0.322	11
KDM6B	0.363579	1.14137e-16	3.84803e-12	0.436	0.209	11
GLUL	0.2813	1.3639e-16	4.59824e-12	0.39	0.165	11
BIN2	0.267962	1.647e-16	5.55269e-12	0.72	0.406	11
CCND3	0.300293	1.68563e-16	5.68295e-12	0.763	0.456	11
VIM	0.427077	3.09017e-16	1.04182e-11	0.97	0.83	11
REL	0.324305	6.73232e-16	2.26973e-11	0.669	0.387	11
FOSB	0.443781	8.92232e-16	3.00807e-11	0.75	0.471	11
PIK3R1	0.263182	9.00777e-16	3.03688e-11	0.72	0.433	11
LCP1	0.341429	9.64602e-16	3.25206e-11	0.89	0.645	11
HOPX	0.275625	1.21765e-15	4.10519e-11	0.606	0.314	11
SQSTM1	0.331871	1.42081e-15	4.79011e-11	0.767	0.49	11
SIPA1	0.282013	2.05718e-15	6.93557e-11	0.534	0.283	11
DUSP8	0.262858	2.64016e-15	8.90104e-11	0.326	0.141	11
RPS26	0.596512	4.50456e-15	1.51867e-10	0.936	0.855	11
CDKN1A	0.317488	4.93798e-15	1.66479e-10	0.318	0.135	11
IFRD1	0.263636	5.332e-15	1.79763e-10	0.64	0.356	11
ZFP36L1	0.385161	1.21663e-14	4.10173e-10	0.835	0.584	11
ABHD17A	0.264092	1.33344e-14	4.49554e-10	0.742	0.459	11
TNFAIP8	0.26843	1.76563e-14	5.95265e-10	0.589	0.324	11
TAGLN2	0.324575	3.19895e-14	1.07849e-09	0.869	0.598	11
NR4A1	0.279181	4.1e-14	1.38227e-09	0.449	0.223	11
CXCR3	0.2705	4.5694e-14	1.54053e-09	0.64	0.365	11
SLC2A3	0.315507	8.88577e-14	2.99575e-09	0.737	0.48	11
TLE5	0.286379	1.66406e-13	5.61023e-09	0.847	0.614	11
RBM38	0.282795	1.25369e-12	4.22668e-08	0.644	0.403	11
TUBA4A	0.319874	1.48271e-12	4.99881e-08	0.784	0.563	11
HIST1H1E	0.33263	1.8089e-12	6.09854e-08	0.432	0.232	11
BZW1	0.274774	4.47103e-12	1.50736e-07	0.733	0.476	11
MYADM	0.2611	7.34277e-12	2.47554e-07	0.712	0.443	11
JUN	0.394476	1.33634e-11	4.50534e-07	0.911	0.754	11
DUSP5	0.25356	3.1097e-11	1.0484e-06	0.479	0.256	11
AREG	0.302757	1.14147e-10	3.84834e-06	0.318	0.154	11
EGR1	0.461575	2.33385e-10	7.86835e-06	0.381	0.202	11
JUND	0.316189	3.29484e-10	1.11082e-05	0.877	0.695	11
DDIT4	0.281164	1.41607e-09	4.77414e-05	0.72	0.483	11
RHOF	0.256105	1.82043e-09	6.13739e-05	0.61	0.407	11
NFKBIZ	0.3194	2.57711e-09	8.68849e-05	0.496	0.309	11
TXNIP	0.281416	3.81972e-09	0.000128778	0.737	0.553	11
CD69	0.331313	7.38955e-09	0.000249131	0.89	0.689	11
TRAV2	0.927382	0	0	0.462	0.014	12
TRAV12-1	0.830305	1.3215e-294	4.45529e-290	0.442	0.02	12
TRBV10-3	1.30383	1.08895e-281	3.67129e-277	0.327	0.011	12
TRBV18	0.481996	7.0348e-241	2.37171e-236	0.281	0.009	12
TRGV8	1.17012	2.7305e-234	9.20561e-230	0.497	0.035	12
CXCL13	1.52666	3.68086e-211	1.24097e-206	0.834	0.111	12
ETV1	0.554444	3.98367e-185	1.34306e-180	0.382	0.025	12
TRBV19	0.605046	3.49292e-174	1.1776e-169	0.352	0.022	12
TRAV12-3	1.44088	1.147e-153	3.867e-149	0.342	0.025	12
CTLA4	1.028	2.78218e-115	9.37985e-111	0.804	0.18	12
HAVCR2	0.890691	5.8588e-115	1.97524e-110	0.814	0.172	12
TRBV9	1.70558	1.79286e-110	6.04444e-106	0.603	0.109	12
TTN	0.851419	1.89546e-110	6.39037e-106	0.799	0.178	12
TSHZ2	0.658068	4.50711e-109	1.51953e-104	0.477	0.066	12
CCDC141	0.706482	6.89793e-109	2.32557e-104	0.558	0.091	12
LINC00158	0.406483	1.06288e-108	3.58339e-104	0.271	0.022	12
PDCD1	0.877588	2.30383e-108	7.76715e-104	0.824	0.187	12
LGALS3BP	0.564593	2.3193e-104	7.81928e-100	0.407	0.051	12
TOX2	0.680186	4.28582e-100	1.44492e-95	0.472	0.07	12
CD200R1	0.654442	1.12073e-99	3.77843e-95	0.503	0.079	12
RHOB	1.35761	2.39555e-98	8.07636e-94	0.869	0.277	12
SLF1	0.812659	2.06873e-92	6.97453e-88	0.764	0.188	12
PLPP1	0.594544	2.17341e-88	7.32743e-84	0.492	0.085	12
RGS2	1.35344	1.08856e-85	3.66998e-81	0.884	0.344	12
TOX	0.839415	2.23187e-80	7.52454e-76	0.789	0.226	12
DUSP4	1.21996	5.59557e-79	1.88649e-74	0.955	0.381	12
ADGRE2	0.404612	5.59695e-79	1.88695e-74	0.271	0.03	12
INPP5F	0.491891	8.41769e-77	2.83794e-72	0.377	0.057	12
NBL1	0.819326	2.35395e-76	7.93611e-72	0.588	0.133	12
RGS1	1.22406	3.21543e-75	1.08405e-70	0.98	0.529	12
CD8A	0.904987	4.1317e-75	1.39296e-70	0.995	0.715	12
HNRNPLL	0.717263	8.83346e-74	2.97811e-69	0.784	0.231	12
CRIM1	0.618717	1.68786e-73	5.69045e-69	0.462	0.088	12
SARDH	0.423231	3.04546e-69	1.02675e-64	0.377	0.061	12
CD82	0.746924	4.31515e-68	1.45481e-63	0.814	0.26	12
LYST	0.782052	2.39967e-67	8.09025e-63	0.894	0.333	12
KIAA0825	0.342306	6.1367e-64	2.06893e-59	0.256	0.032	12
SNX9	0.678035	2.84652e-63	9.59677e-59	0.668	0.19	12
HLA-DRB5	0.783672	4.82461e-63	1.62657e-58	0.899	0.342	12
IFNG	1.08918	1.52819e-62	5.15215e-58	0.884	0.344	12
PECAM1	0.608818	2.50759e-62	8.4541e-58	0.673	0.194	12
VCAM1	0.58422	4.28561e-62	1.44485e-57	0.533	0.121	12
LAG3	0.803062	4.60371e-61	1.5521e-56	0.96	0.442	12
ST8SIA1	0.394512	8.58022e-61	2.89273e-56	0.332	0.054	12
GFOD1	0.501631	4.5222e-60	1.52461e-55	0.412	0.081	12
FUT8	0.585704	8.61796e-60	2.90546e-55	0.573	0.151	12
KLRC4	0.604209	7.32845e-59	2.47071e-54	0.603	0.167	12
ADGRG1	0.690359	3.51215e-58	1.18409e-53	0.618	0.17	12
SIRPG	0.620261	2.05763e-57	6.93708e-53	0.749	0.249	12
FAM3C	0.572469	6.25267e-56	2.10803e-51	0.523	0.132	12
PAG1	0.650699	6.98766e-55	2.35582e-50	0.809	0.311	12
ITM2A	0.759425	1.40789e-54	4.74658e-50	0.95	0.493	12
TRAF5	0.577645	2.2e-53	7.41708e-49	0.704	0.232	12
DGKH	0.452228	4.4745e-53	1.50853e-48	0.392	0.082	12
PTPN6	0.72984	7.43702e-53	2.50732e-48	0.834	0.347	12
UBE2F	0.634221	9.64096e-53	3.25035e-48	0.633	0.198	12
PDE4DIP	0.575704	1.98954e-51	6.70754e-47	0.623	0.193	12
HLA-A	0.417194	3.01955e-49	1.01801e-44	1	0.976	12
CLECL1	0.417832	1.40516e-48	4.73734e-44	0.302	0.055	12
INPP4B	0.661737	1.60286e-48	5.4039e-44	0.704	0.258	12
IFITM1	0.734612	4.18118e-48	1.40964e-43	1	0.655	12
CD27	0.601774	6.34818e-48	2.14023e-43	0.935	0.42	12
GAS7	0.32702	8.68029e-48	2.92647e-43	0.281	0.049	12
HLA-DQA1	0.597513	1.44712e-47	4.87882e-43	0.764	0.276	12
SFMBT2	0.468664	4.30472e-47	1.45129e-42	0.548	0.161	12
STAT1	0.673752	5.7998e-46	1.95534e-41	0.839	0.36	12
RBPJ	0.560188	7.42366e-46	2.50281e-41	0.744	0.28	12
AC243829.4	0.421519	1.00815e-45	3.39888e-41	0.392	0.09	12
AFAP1L2	0.336753	1.63391e-45	5.50856e-41	0.271	0.048	12
TRIB1	0.365883	2.05256e-45	6.92001e-41	0.251	0.042	12
SYT11	0.462226	6.88821e-44	2.32229e-39	0.523	0.153	12
UBC	0.650213	1.35575e-42	4.57078e-38	1	0.91	12
TNFRSF9	0.442123	3.20836e-42	1.08167e-37	0.442	0.114	12
NAB1	0.432221	4.10219e-41	1.38301e-36	0.432	0.116	12
HLA-DQB1	0.678626	2.43887e-40	8.2224e-36	0.804	0.365	12
SNAP47	0.476023	2.67514e-40	9.01898e-36	0.518	0.157	12
HLA-DPA1	0.626021	4.96718e-40	1.67464e-35	0.975	0.621	12
SH2D2A	0.580971	1.24122e-39	4.18465e-35	0.844	0.379	12
DTHD1	0.422944	1.28411e-39	4.32925e-35	0.412	0.108	12
GALM	0.431607	1.7791e-39	5.99807e-35	0.593	0.197	12
MIR155HG	0.367179	2.09271e-39	7.05537e-35	0.392	0.098	12
SEMA7A	0.311819	8.93811e-39	3.01339e-34	0.251	0.047	12
METRNL	0.651274	1.21375e-38	4.09203e-34	0.749	0.309	12
CLSTN3	0.456717	3.56814e-38	1.20296e-33	0.477	0.146	12
UTS2	0.459309	4.503e-38	1.51814e-33	0.523	0.166	12
GALNT1	0.52349	6.39654e-38	2.15653e-33	0.518	0.171	12
ICOS	0.502637	7.72706e-38	2.6051e-33	0.588	0.204	12
SEMA4A	0.40912	2.27071e-37	7.65546e-33	0.291	0.064	12
SIT1	0.529013	3.52948e-37	1.18993e-32	0.749	0.313	12
HERPUD2	0.52711	5.34874e-37	1.80327e-32	0.779	0.353	12
PRDM1	0.610618	7.47672e-37	2.5207e-32	0.618	0.233	12
GBP5	0.580045	4.00369e-36	1.34981e-31	0.804	0.372	12
GNAS	0.535469	4.27598e-36	1.44161e-31	0.985	0.655	12
[truncated: 957 more rows]

## Sheet: NK cells
Table S2. List of genes specific to the cell clusters in total cells and each cell lineage.
gene	avg_logFC	p_val	p_val_adj	pct.1	pct.2	cluster
B2M	0.463382	3.32289e-230	1.12028e-225	1	0.996	0
MALAT1	0.741587	4.09109e-217	1.37927e-212	0.995	0.998	0
TMSB4X	0.57861	1.38679e-216	4.67543e-212	1	0.988	0
RPL27A	0.874921	2.02758e-192	6.83579e-188	0.967	0.9	0
RPL21	0.604133	9.45752e-174	3.18851e-169	0.992	0.972	0
RPL13A	0.754775	1.56992e-159	5.29282e-155	0.956	0.918	0
RPL7	0.731329	7.56082e-154	2.54905e-149	0.948	0.884	0
RPS17	0.813507	7.46172e-153	2.51564e-148	0.909	0.77	0
RPS20	0.806357	6.22923e-145	2.10012e-140	0.893	0.781	0
RPL31	0.668399	6.68732e-141	2.25456e-136	0.94	0.905	0
RPL23A	0.477821	6.99903e-124	2.35965e-119	0.989	0.967	0
RPS29	0.627612	1.95456e-120	6.58959e-116	0.955	0.914	0
RPS10	0.84452	6.03902e-119	2.03599e-114	0.772	0.474	0
MT-ND4	0.503018	3.35588e-117	1.1314e-112	0.985	0.953	0
MT-ND2	0.500555	1.28855e-114	4.34422e-110	0.968	0.911	0
RPLP2	0.439548	1.443e-108	4.86493e-104	0.991	0.974	0
RPS11	0.542869	4.59782e-96	1.55011e-91	0.915	0.904	0
FGFBP2	0.590842	5.20678e-95	1.75541e-90	0.905	0.631	0
GZMH	0.654643	1.27411e-93	4.29554e-89	0.878	0.679	0
RPL17	0.397047	2.42474e-90	8.17476e-86	0.979	0.967	0
RPL15	0.36865	4.48028e-87	1.51048e-82	0.985	0.964	0
RPS6	0.361167	4.72099e-86	1.59163e-81	0.99	0.972	0
RPL3	0.341507	7.68076e-84	2.58949e-79	0.991	0.977	0
NKG7	0.331209	1.75535e-77	5.91797e-73	0.998	0.951	0
GZMB	0.421104	1.63344e-69	5.50697e-65	0.969	0.826	0
RPS16	0.360821	3.01309e-62	1.01583e-57	0.958	0.951	0
RPL23	0.499852	1.4404e-60	4.85618e-56	0.808	0.792	0
RPL34	0.2765	4.2099e-60	1.41933e-55	0.985	0.976	0
RPL9	0.299462	1.21103e-51	4.08287e-47	0.962	0.956	0
RPS2	0.271477	5.106e-50	1.72144e-45	0.984	0.971	0
S100A6	0.446441	1.87821e-49	6.33219e-45	0.85	0.812	0
TMSB10	0.255877	5.35253e-49	1.80455e-44	0.997	0.977	0
EEF1G	0.347642	9.08692e-47	3.06357e-42	0.867	0.866	0
UBA52	0.316071	1.40688e-46	4.74315e-42	0.945	0.94	0
CMC1	0.642994	1.32385e-44	4.46322e-40	0.7	0.62	0
RPL27	0.312995	1.75696e-44	5.9234e-40	0.923	0.934	0
CCL5	0.282853	6.74283e-43	2.27328e-38	0.96	0.87	0
FTL	0.259892	1.75881e-42	5.92965e-38	0.97	0.968	0
CYBA	0.310694	3.02321e-40	1.01924e-35	0.946	0.938	0
RPL38	0.404867	5.75956e-40	1.94178e-35	0.835	0.854	0
HLA-DPB1	0.519803	5.69727e-35	1.92078e-30	0.63	0.562	0
FCGR3A	0.36958	8.86427e-33	2.9885e-28	0.811	0.664	0
S100A4	0.354673	1.43093e-30	4.82424e-26	0.883	0.827	0
ARPC2	0.283879	4.84363e-30	1.63298e-25	0.888	0.889	0
RPL36A	0.282084	3.69657e-29	1.24626e-24	0.878	0.899	0
LGALS1	0.423714	2.30398e-28	7.76763e-24	0.682	0.582	0
RPL36AL	0.312577	3.57163e-26	1.20414e-21	0.805	0.856	0
UQCRB	0.398001	8.19539e-25	2.76299e-20	0.676	0.722	0
NEAT1	0.419445	9.2512e-25	3.11895e-20	0.721	0.736	0
NOP53	0.385979	1.68393e-24	5.67721e-20	0.691	0.701	0
TRBC1	0.36424	1.93831e-23	6.53481e-19	0.71	0.649	0
MYO1F	0.442901	3.52855e-20	1.18962e-15	0.562	0.559	0
RPL37A	0.265258	3.78606e-20	1.27643e-15	0.902	0.929	0
KLRC3	0.516982	1.19668e-19	4.03449e-15	0.371	0.269	0
KLRF1	0.410145	2.32471e-18	7.83751e-14	0.631	0.638	0
SRP14	0.253285	1.32452e-16	4.4655e-12	0.752	0.84	0
C12orf75	0.409198	3.30614e-14	1.11463e-09	0.534	0.528	0
LINC-PINT	0.388217	3.55399e-14	1.19819e-09	0.356	0.266	0
SUB1	0.330026	3.8803e-13	1.30821e-08	0.659	0.75	0
TOMM7	0.25335	7.774e-12	2.62093e-07	0.698	0.778	0
PLAC8	0.302325	5.43016e-10	1.83072e-05	0.587	0.602	0
ATP5MPL	0.40237	1.25011e-09	4.21462e-05	0.434	0.441	0
PPP2R5C	0.391252	8.62016e-09	0.00029062	0.505	0.535	0
ATP6V0E1	0.310849	2.40952e-08	0.000812345	0.558	0.64	0
ISG20	0.411605	2.52771e-08	0.000852193	0.486	0.513	0
CD3E	0.952123	4.70031e-118	1.58466e-113	0.636	0.25	1
AHNAK	0.737713	1.28782e-110	4.34175e-106	0.784	0.399	1
EFHD2	0.627631	2.32836e-102	7.84984e-98	0.887	0.586	1
KLRC2	0.644706	7.33848e-93	2.47409e-88	0.692	0.302	1
KLF2	0.668223	2.29918e-87	7.75145e-83	0.814	0.451	1
FLNA	0.583177	2.51976e-85	8.49513e-81	0.852	0.555	1
KLRC4	0.44382	6.89421e-79	2.32431e-74	0.33	0.079	1
ARL4C	0.549745	1.1434e-76	3.85486e-72	0.869	0.613	1
TNF	0.814119	6.75376e-76	2.27696e-71	0.368	0.103	1
RAP2A	0.394109	4.78458e-72	1.61307e-67	0.318	0.079	1
SLC9A3R1	0.515291	8.70857e-72	2.93601e-67	0.779	0.463	1
MYH9	0.548335	9.20178e-70	3.10229e-65	0.753	0.441	1
ADGRG1	0.504897	4.35024e-69	1.46664e-64	0.72	0.364	1
CX3CR1	0.462633	1.68624e-68	5.68498e-64	0.678	0.307	1
IL32	0.466075	2.59049e-68	8.73357e-64	0.844	0.523	1
PLEK	0.502129	2.50783e-67	8.45489e-63	0.783	0.428	1
LAG3	0.341455	6.034e-67	2.0343e-62	0.317	0.079	1
GNAI2	0.481342	2.67434e-66	9.01627e-62	0.783	0.455	1
PRF1	0.397953	5.81612e-66	1.96085e-61	0.977	0.834	1
CD81	0.434371	8.46025e-63	2.85229e-58	0.768	0.42	1
TBX21	0.431023	2.34294e-60	7.89899e-56	0.683	0.339	1
GZMH	0.379776	8.58654e-60	2.89487e-55	0.967	0.67	1
ABHD17A	0.466023	1.09084e-59	3.67767e-55	0.779	0.481	1
TGFBR3	0.387807	7.05701e-59	2.3792e-54	0.527	0.224	1
PTPRC	0.36219	4.25806e-58	1.43556e-53	0.93	0.763	1
BHLHE40	0.490755	4.15062e-57	1.39934e-52	0.76	0.448	1
CAPN2	0.393059	5.30577e-56	1.78879e-51	0.599	0.285	1
DUSP5	0.478297	2.37506e-55	8.00729e-51	0.393	0.15	1
HLA-DRB5	0.46893	2.58598e-54	8.71837e-50	0.383	0.14	1
S100A4	0.382885	2.73879e-54	9.23356e-50	0.958	0.81	1
FGL2	0.295403	4.97633e-54	1.67772e-49	0.332	0.105	1
SH3BGRL3	0.310861	2.24935e-53	7.58346e-49	0.986	0.902	1
NFATC2	0.411964	3.41452e-53	1.15117e-48	0.596	0.291	1
CST7	0.298591	1.30858e-52	4.41174e-48	0.991	0.887	1
ITGB1	0.379183	2.46495e-52	8.31035e-48	0.719	0.395	1
TGFB1	0.418835	2.17371e-51	7.32845e-47	0.818	0.568	1
SSBP4	0.360919	1.75964e-50	5.93245e-46	0.591	0.292	1
IGF2R	0.386318	6.79537e-49	2.29099e-44	0.556	0.278	1
FCGR3A	0.343838	1.09108e-48	3.67848e-44	0.946	0.637	1
CDC25B	0.348285	2.11607e-48	7.13412e-44	0.389	0.152	1
CSK	0.374021	4.5983e-48	1.55027e-43	0.67	0.368	1
PTP4A2	0.397497	2.00909e-47	6.77344e-43	0.751	0.474	1
SYNE1	0.346506	4.74034e-47	1.59816e-42	0.669	0.371	1
ITGB2	0.332709	1.1438e-46	3.85621e-42	0.941	0.758	1
TOB1	0.329146	1.91761e-46	6.46503e-42	0.394	0.158	1
TMBIM1	0.311863	2.78188e-46	9.37883e-42	0.459	0.204	1
MT-ND4L	0.309532	7.60293e-46	2.56325e-41	0.817	0.518	1
SELPLG	0.351804	2.97083e-45	1.00158e-40	0.697	0.394	1
FCRL6	0.363701	3.3555e-45	1.13127e-40	0.599	0.305	1
ACTB	0.348994	3.52561e-45	1.18862e-40	1	0.983	1
FAM53B	0.266464	4.56002e-44	1.53737e-39	0.35	0.132	1
IFNG	0.549382	1.19805e-43	4.03912e-39	0.503	0.249	1
SSBP3	0.273341	1.62213e-43	5.46886e-39	0.41	0.17	1
PIK3R5	0.289063	1.69625e-43	5.71873e-39	0.351	0.137	1
IFITM1	0.352433	2.39457e-43	8.07307e-39	0.844	0.602	1
TAF10	0.356406	5.05732e-43	1.70502e-38	0.594	0.318	1
PRSS23	0.305068	5.19162e-43	1.7503e-38	0.62	0.309	1
PXN	0.314963	8.22303e-43	2.77231e-38	0.494	0.227	1
SYNE2	0.311772	1.98321e-42	6.68618e-38	0.732	0.42	1
RASA3	0.317507	3.71216e-42	1.25152e-37	0.485	0.229	1
ALDOA	0.340706	2.77532e-41	9.35671e-37	0.533	0.274	1
KLF3	0.324406	4.50082e-40	1.51741e-35	0.507	0.249	1
MED15	0.305789	4.55071e-40	1.53423e-35	0.41	0.186	1
SUN2	0.347956	7.55599e-40	2.54743e-35	0.783	0.535	1
MXRA7	0.316924	1.09598e-39	3.69499e-35	0.376	0.165	1
S1PR5	0.277294	1.91814e-39	6.46682e-35	0.706	0.39	1
CALM1	0.261674	2.00135e-39	6.74736e-35	0.964	0.868	1
LIME1	0.289181	4.0226e-39	1.35618e-34	0.604	0.316	1
ZEB2	0.316695	4.90553e-39	1.65385e-34	0.773	0.48	1
KLF13	0.329446	5.82042e-39	1.9623e-34	0.569	0.31	1
CAPNS1	0.335182	8.75829e-39	2.95277e-34	0.593	0.33	1
CD99	0.316996	8.96801e-39	3.02348e-34	0.907	0.679	1
CCDC88C	0.307144	1.25629e-38	4.23546e-34	0.547	0.294	1
LITAF	0.285429	2.32009e-38	7.82195e-34	0.918	0.695	1
PNRC1	0.307584	2.48831e-38	8.38908e-34	0.929	0.763	1
ZFP36L1	0.389266	3.60387e-38	1.21501e-33	0.759	0.488	1
ANXA6	0.324161	6.01883e-38	2.02919e-33	0.73	0.453	1
PTMS	0.252394	9.71905e-38	3.27668e-33	0.311	0.115	1
PTPRCAP	0.342539	1.18058e-37	3.98021e-33	0.403	0.187	1
DSTN	0.281912	1.75398e-37	5.91336e-33	0.624	0.343	1
CYFIP2	0.285913	2.0949e-37	7.06273e-33	0.596	0.321	1
HLA-DRB1	0.288535	2.80819e-37	9.46753e-33	0.668	0.371	1
KLRG1	0.386639	2.95217e-37	9.95296e-33	0.315	0.127	1
ADRB2	0.292231	3.23448e-37	1.09047e-32	0.459	0.217	1
ITGAL	0.298616	3.66683e-37	1.23624e-32	0.593	0.326	1
MT-ND6	0.296454	4.11107e-37	1.38601e-32	0.586	0.322	1
GTF3C1	0.276079	4.72166e-37	1.59186e-32	0.492	0.245	1
ZAP70	0.292994	1.61181e-36	5.43404e-32	0.762	0.491	1
TLE5	0.298097	1.70709e-36	5.75527e-32	0.852	0.613	1
S100A6	0.268748	2.0436e-36	6.88979e-32	0.969	0.782	1
ZYX	0.325593	2.06715e-36	6.9692e-32	0.52	0.277	1
APBB1IP	0.283033	7.5907e-36	2.55913e-31	0.611	0.347	1
ZBTB38	0.268664	1.10222e-35	3.71603e-31	0.435	0.205	1
HSPA8	0.279544	1.28395e-35	4.32871e-31	0.934	0.78	1
MT-ATP8	0.260322	1.59519e-35	5.37802e-31	0.497	0.257	1
RIPOR2	0.319764	1.78654e-35	6.02316e-31	0.573	0.312	1
HLA-DPA1	0.280228	2.2756e-35	7.67195e-31	0.733	0.445	1
PPP6R1	0.288723	2.56906e-35	8.66134e-31	0.446	0.225	1
LCP1	0.334888	3.68682e-35	1.24298e-30	0.841	0.6	1
ZBTB7A	0.303642	6.99772e-35	2.35921e-30	0.527	0.289	1
METRNL	0.382003	7.30848e-35	2.46398e-30	0.626	0.381	1
GNG2	0.282935	2.37484e-34	8.00654e-30	0.786	0.502	1
RAB29	0.261162	2.88438e-34	9.72441e-30	0.512	0.267	1
LINC01578	0.270955	1.211e-33	4.08277e-29	0.64	0.374	1
CYTH1	0.29267	3.43456e-33	1.15793e-28	0.575	0.325	1
FGFBP2	0.256805	5.82068e-33	1.96238e-28	0.964	0.636	1
PTGER4	0.308657	9.80823e-33	3.30675e-28	0.615	0.36	1
LBR	0.279699	1.18784e-32	4.00469e-28	0.464	0.244	1
STK10	0.276672	1.39465e-32	4.70194e-28	0.638	0.38	1
MBP	0.301479	1.56314e-32	5.26997e-28	0.733	0.476	1
TTC38	0.253468	1.60923e-32	5.42537e-28	0.625	0.349	1
ORAI1	0.292127	2.05939e-32	6.94303e-28	0.479	0.257	1
ITGB7	0.28122	3.36323e-32	1.13388e-27	0.593	0.342	1
SASH3	0.283362	4.11761e-32	1.38821e-27	0.594	0.342	1
RALGDS	0.258737	9.10244e-32	3.0688e-27	0.435	0.222	1
KIR2DL3	0.285022	1.1187e-31	3.77158e-27	0.357	0.16	1
TUBA4A	0.275123	3.50882e-31	1.18297e-26	0.583	0.342	1
MYO1G	0.269514	6.14835e-31	2.07286e-26	0.634	0.38	1
RHOA	0.280448	6.48457e-31	2.18621e-26	0.858	0.638	1
S1PR1	0.267318	1.6266e-30	5.48391e-26	0.366	0.175	1
HNRNPL	0.260821	2.09193e-30	7.05272e-26	0.594	0.343	1
LAPTM5	0.276957	2.25109e-30	7.58931e-26	0.858	0.66	1
PPP3CC	0.25119	2.29136e-30	7.72508e-26	0.509	0.28	1
DDX39A	0.267892	2.38786e-30	8.05044e-26	0.541	0.309	1
CNN2	0.306259	3.1284e-30	1.05471e-25	0.505	0.281	1
RNPEPL1	0.256467	3.44458e-30	1.16131e-25	0.526	0.293	1
YWHAB	0.2772	8.26186e-30	2.7854e-25	0.829	0.612	1
RASSF1	0.252012	8.48853e-30	2.86182e-25	0.624	0.375	1
IL2RG	0.268403	9.66593e-30	3.25877e-25	0.887	0.694	1
YWHAZ	0.27654	1.01239e-29	3.41316e-25	0.88	0.705	1
DGKZ	0.256148	1.71333e-29	5.77632e-25	0.589	0.345	1
ATP2B4	0.272695	2.38776e-29	8.0501e-25	0.459	0.247	1
HSPA5	0.309764	1.89431e-28	6.38646e-24	0.788	0.529	1
HCLS1	0.278698	2.90486e-28	9.79345e-24	0.721	0.476	1
GNPTAB	0.280225	6.62137e-28	2.23233e-23	0.59	0.363	1
YPEL3	0.276167	1.51447e-27	5.1059e-23	0.613	0.377	1
ACTG1	0.285613	2.79755e-27	9.43166e-23	0.967	0.877	1
DDOST	0.261396	3.03638e-27	1.02369e-22	0.57	0.345	1
CD52	0.256048	8.43361e-27	2.84331e-22	0.783	0.551	1
SMAD7	0.257881	1.72106e-26	5.80239e-22	0.544	0.325	1
DDIT3	0.259651	2.01539e-26	6.79467e-22	0.446	0.245	1
CD247	0.255869	2.88912e-26	9.74039e-22	0.923	0.751	1
NR4A2	0.304784	6.88957e-26	2.32275e-21	0.762	0.567	1
PDIA3	0.253141	1.886e-25	6.35847e-21	0.794	0.567	1
CALR	0.291474	2.46361e-25	8.3058e-21	0.815	0.595	1
ARRB2	0.252194	3.34159e-25	1.12658e-20	0.476	0.276	1
WDR1	0.250779	9.67637e-25	3.26229e-20	0.653	0.429	1
HSP90B1	0.268083	1.44545e-24	4.8732e-20	0.711	0.481	1
PCBP1	0.250744	1.6287e-24	5.491e-20	0.826	0.612	1
RPS26	0.287071	4.6952e-20	1.58294e-15	0.935	0.823	1
HSPA1B	0.395153	8.17959e-20	2.75767e-15	0.387	0.222	1
CCL4L2	0.60979	8.23773e-19	2.77727e-14	0.536	0.358	1
MT2A	0.285481	3.7534e-18	1.26542e-13	0.51	0.33	1
CCL4	0.304073	1.09671e-17	3.69744e-13	0.915	0.738	1
H1FX	0.299399	6.45204e-17	2.17524e-12	0.448	0.287	1
SPON2	0.862291	1.28755e-141	4.34085e-137	0.925	0.503	2
CX3CR1	0.759463	1.22125e-95	4.11733e-91	0.702	0.312	2
FCER1G	0.562089	4.24806e-87	1.43219e-82	0.925	0.565	2
SH2D1B	0.599044	1.79262e-79	6.04365e-75	0.688	0.334	2
C1orf162	0.546386	3.91409e-79	1.31959e-74	0.532	0.192	2
MYOM2	0.76441	2.67367e-75	9.01401e-71	0.549	0.22	2
PTGDS	1.11644	5.79605e-75	1.95408e-70	0.45	0.154	2
PRF1	0.47049	3.07295e-73	1.03601e-68	0.978	0.838	2
CEBPD	0.589333	2.14974e-70	7.24764e-66	0.62	0.276	2
EFHD2	0.541532	3.3934e-70	1.14405e-65	0.845	0.605	2
TXNIP	0.580706	3.50808e-69	1.18271e-64	0.878	0.64	2
LAIR2	0.594735	3.85848e-68	1.30085e-63	0.451	0.159	2
PLEK	0.544286	1.99182e-66	6.71521e-62	0.763	0.443	2
CHST2	0.478185	1.77579e-62	5.9869e-58	0.458	0.172	2
AKR1C3	0.449035	1.33005e-60	4.48414e-56	0.451	0.161	2
ABHD17A	0.516946	2.77168e-58	9.34445e-54	0.758	0.494	2
IGFBP7	0.450672	6.19729e-58	2.08936e-53	0.658	0.321	2
TBX21	0.522861	1.37864e-57	4.64793e-53	0.661	0.354	2
RAC2	0.425535	1.10231e-55	3.71634e-51	0.925	0.755	2
KLF2	0.598619	1.79316e-53	6.04547e-49	0.759	0.474	2
ITGB2	0.376279	4.08773e-52	1.37814e-47	0.94	0.763	2
ITGAM	0.400777	2.03928e-50	6.87523e-46	0.46	0.197	2
MTSS1	0.386892	2.16689e-50	7.30544e-46	0.371	0.135	2
CD160	0.457867	2.42853e-50	8.18755e-46	0.453	0.189	2
TBXAS1	0.371453	3.13044e-48	1.0554e-43	0.26	0.075	2
TTC38	0.414031	2.02471e-47	6.82611e-43	0.646	0.352	2
S1PR5	0.365185	5.15091e-47	1.73658e-42	0.72	0.396	2
RASSF4	0.381725	5.92517e-47	1.99761e-42	0.334	0.119	2
CXCR2	0.351997	9.85859e-47	3.32372e-42	0.278	0.088	2
IGF2R	0.441975	8.2248e-46	2.77291e-41	0.553	0.287	2
PXN	0.381506	9.81167e-46	3.30791e-41	0.498	0.234	2
LINC00299	0.333088	1.84255e-44	6.21199e-40	0.447	0.192	2
JAK1	0.412304	8.53786e-44	2.87845e-39	0.839	0.63	2
SELPLG	0.410413	1.80391e-43	6.0817e-39	0.681	0.406	2
MAPRE2	0.459925	1.95614e-43	6.59494e-39	0.622	0.368	2
ADGRG1	0.416433	3.88751e-43	1.31064e-38	0.678	0.385	2
LBH	0.414546	4.79917e-43	1.61799e-38	0.593	0.326	2
TLE5	0.369638	1.05801e-41	3.56696e-37	0.84	0.623	2
ARL4C	0.433034	1.67609e-41	5.65078e-37	0.831	0.629	2
JUN	0.584217	1.88788e-41	6.36481e-37	0.8	0.59	2
PLAC8	0.395867	1.98823e-41	6.70312e-37	0.811	0.545	2
PTPN12	0.377127	7.08401e-41	2.3883e-36	0.516	0.264	2
IFITM1	0.458976	1.43672e-40	4.84374e-36	0.824	0.614	2
ARHGEF3	0.370798	8.6593e-40	2.9194e-35	0.523	0.275	2
DENND2D	0.38517	9.54436e-40	3.21778e-35	0.603	0.338	2
CSK	0.37055	2.17302e-39	7.32612e-35	0.642	0.384	2
AGTRAP	0.359523	3.44679e-39	1.16205e-34	0.506	0.256	2
CD247	0.318574	2.27743e-38	7.67813e-34	0.928	0.755	2
CD38	0.362532	3.11925e-38	1.05162e-33	0.481	0.24	2
CCND3	0.373257	4.46139e-38	1.50411e-33	0.811	0.564	2
PRSS23	0.364462	7.53672e-38	2.54093e-33	0.607	0.321	2
DIP2A	0.339832	7.94086e-38	2.67718e-33	0.571	0.311	2
IL18RAP	0.32735	3.53316e-37	1.19117e-32	0.293	0.111	2
OSBPL5	0.297401	9.98282e-37	3.36561e-32	0.33	0.135	2
GZMM	0.318901	3.21078e-36	1.08248e-31	0.852	0.594	2
CLIC3	0.399246	6.95141e-36	2.3436e-31	0.778	0.535	2
MYBL1	0.332116	2.1192e-35	7.14466e-31	0.441	0.216	2
RAP1B	0.305997	3.02535e-35	1.01997e-30	0.873	0.656	2
SLC2A3	0.47066	2.25622e-34	7.60662e-30	0.644	0.417	2
GNG2	0.317323	8.79469e-34	2.96504e-29	0.774	0.513	2
FGR	0.349545	1.10239e-33	3.7166e-29	0.612	0.376	2
CTBP1	0.301011	1.75855e-33	5.92876e-29	0.499	0.272	2
CXXC5	0.293101	3.13587e-33	1.05723e-28	0.453	0.229	2
GNAI2	0.352398	4.60503e-33	1.55254e-28	0.715	0.481	2
SLC9A3R1	0.362316	5.49242e-33	1.85171e-28	0.715	0.488	2
TLE1	0.281301	5.6411e-33	1.90184e-28	0.326	0.138	2
ADRB2	0.28388	8.06393e-33	2.71867e-28	0.455	0.225	2
LINC00861	0.334753	1.1952e-32	4.02951e-28	0.488	0.257	2
MLC1	0.267009	2.29997e-32	7.75413e-28	0.27	0.106	2
ZAP70	0.333999	5.63241e-32	1.89891e-27	0.737	0.505	2
GIMAP7	0.332262	9.84346e-32	3.31862e-27	0.679	0.433	2
DUSP1	0.500983	1.19927e-31	4.04321e-27	0.845	0.657	2
STK10	0.30187	1.49035e-31	5.02457e-27	0.635	0.388	2
GSAP	0.289727	1.50683e-31	5.08012e-27	0.308	0.131	2
SYNE1	0.268002	2.17396e-31	7.32929e-27	0.64	0.386	2
CD300A	0.294624	3.29971e-31	1.11246e-26	0.627	0.37	2
ACTB	0.273081	4.65339e-31	1.56884e-26	0.997	0.984	2
CYTH1	0.287367	5.56409e-31	1.87588e-26	0.575	0.332	2
SH3BP5	0.308616	8.47366e-31	2.85681e-26	0.447	0.236	2
APMAP	0.3138	9.27337e-31	3.12642e-26	0.753	0.53	2
CST7	0.250834	1.11809e-30	3.76952e-26	0.982	0.893	2
MARCKSL1	0.306619	1.17671e-30	3.96715e-26	0.322	0.144	2
PLEKHG3	0.273411	1.18467e-30	3.99398e-26	0.328	0.146	2
PTPRCAP	0.353032	1.53793e-30	5.18497e-26	0.384	0.198	2
IQGAP1	0.314355	3.02136e-30	1.01862e-25	0.701	0.465	2
TGFBR3	0.28055	6.97086e-30	2.35016e-25	0.466	0.248	2
SYTL1	0.312195	9.05871e-30	3.05405e-25	0.615	0.386	2
AOAH	0.294154	1.55578e-29	5.24514e-25	0.623	0.394	2
TAGAP	0.383287	1.69171e-29	5.70342e-25	0.576	0.359	2
JUNB	0.381249	2.56445e-29	8.64579e-25	0.884	0.759	2
MSN	0.306399	3.20885e-29	1.08183e-24	0.791	0.58	2
RHOA	0.287127	3.23415e-29	1.09036e-24	0.857	0.644	2
MTPN	0.310379	9.09745e-29	3.06711e-24	0.554	0.329	2
ICAM2	0.301036	1.16555e-28	3.92953e-24	0.434	0.233	2
ITPRIP	0.319675	2.26364e-28	7.63163e-24	0.356	0.176	2
SASH3	0.319074	4.73895e-28	1.59769e-23	0.572	0.355	2
SLC44A2	0.25871	5.51951e-28	1.86085e-23	0.451	0.244	2
SAMHD1	0.319351	1.48691e-27	5.01297e-23	0.468	0.268	2
CCL4	0.296219	1.67618e-27	5.65109e-23	0.93	0.74	2
OSTF1	0.283001	1.68547e-27	5.68239e-23	0.717	0.478	2
PCBP1	0.297285	1.95352e-27	6.58611e-23	0.819	0.62	2
DNAJB1	0.554493	2.74362e-27	9.24983e-23	0.668	0.477	2
RPA2	0.298983	3.05393e-27	1.0296e-22	0.428	0.23	2
KLF3	0.252043	3.15074e-27	1.06224e-22	0.482	0.262	2
HIPK2	0.279433	3.28386e-27	1.10712e-22	0.462	0.256	2
ARRB2	0.251433	1.03948e-26	3.50451e-22	0.497	0.276	2
ZEB2	0.259519	1.18624e-26	3.9993e-22	0.746	0.495	2
RASA3	0.260745	1.6575e-26	5.58809e-22	0.45	0.245	2
ADD3	0.308752	2.01647e-26	6.79834e-22	0.559	0.347	2
UCP2	0.315151	2.15224e-26	7.25607e-22	0.722	0.497	2
RIPOR2	0.283609	4.42011e-26	1.4902e-21	0.547	0.326	2
FCRL6	0.273073	6.44467e-26	2.17276e-21	0.553	0.325	2
PTGDR	0.309473	6.6442e-26	2.24003e-21	0.468	0.268	2
FOS	0.413209	7.89608e-26	2.66209e-21	0.765	0.581	2
PSAP	0.282822	1.01684e-25	3.42816e-21	0.661	0.439	2
CTSC	0.259646	1.95689e-25	6.59747e-21	0.787	0.563	2
FLNA	0.276167	2.35423e-25	7.93704e-21	0.78	0.581	2
FCMR	0.319899	2.6308e-25	8.86947e-21	0.49	0.293	2
S1PR1	0.265584	2.67413e-25	9.01557e-21	0.363	0.182	2
RGS19	0.26738	3.19174e-25	1.07606e-20	0.462	0.263	2
RHOC	0.301486	4.9452e-25	1.66722e-20	0.704	0.48	2
PREX1	0.278565	9.00763e-25	3.03683e-20	0.536	0.329	2
HSP90AA1	0.312205	1.04918e-24	3.53722e-20	0.912	0.778	2
GADD45B	0.372657	2.03353e-24	6.85584e-20	0.731	0.506	2
DDX39A	0.292033	2.74488e-24	9.25409e-20	0.519	0.321	2
NFATC2	0.316357	3.43456e-24	1.15793e-19	0.514	0.32	2
PLEKHF1	0.255092	5.31521e-24	1.79197e-19	0.479	0.278	2
PKN1	0.275838	7.20308e-24	2.42844e-19	0.519	0.319	2
HNRNPL	0.273307	7.39026e-24	2.49155e-19	0.567	0.357	2
NFIL3	0.258272	1.0675e-23	3.59897e-19	0.28	0.131	2
IVNS1ABP	0.311998	1.48185e-23	4.99591e-19	0.523	0.323	2
PTPN6	0.285034	3.54075e-23	1.19373e-18	0.537	0.33	2
BTG2	0.294832	4.7119e-23	1.58857e-18	0.726	0.518	2
CD53	0.257982	4.76638e-23	1.60694e-18	0.813	0.63	2
PMAIP1	0.358784	5.12113e-23	1.72654e-18	0.434	0.253	2
IER2	0.288194	6.2813e-23	2.11768e-18	0.9	0.761	2
IER5	0.373772	7.09488e-23	2.39197e-18	0.455	0.277	2
PPP1R18	0.25053	1.98022e-22	6.67613e-18	0.702	0.487	2
SIPA1	0.273199	2.21831e-22	7.47881e-18	0.476	0.289	2
XBP1	0.295439	1.01129e-21	3.40947e-17	0.68	0.483	2
CCL3	0.313118	1.04133e-21	3.51075e-17	0.62	0.431	2
NEU1	0.331402	1.0953e-21	3.69268e-17	0.398	0.231	2
RHOB	0.38374	3.20684e-21	1.08115e-16	0.402	0.237	2
ZFP36	0.342983	3.37128e-21	1.13659e-16	0.886	0.761	2
TLN1	0.252843	5.42752e-21	1.82984e-16	0.658	0.459	2
DDIT3	0.365297	7.28105e-21	2.45473e-16	0.421	0.257	2
PDIA3	0.257805	8.44331e-21	2.84658e-16	0.77	0.58	2
NCR3	0.268704	7.12722e-20	2.40287e-15	0.434	0.259	2
CD8A	0.299289	1.11797e-19	3.76912e-15	0.257	0.126	2
PTGER4	0.258647	2.09731e-17	7.07087e-13	0.562	0.38	2
HSPA1A	0.553863	8.88009e-16	2.99383e-11	0.402	0.259	2
SERTAD1	0.275472	2.11825e-14	7.14148e-10	0.494	0.345	2
HSPA1B	0.477437	2.53815e-13	8.55711e-09	0.356	0.234	2
IFNG	0.296669	2.0692e-11	6.97611e-07	0.406	0.28	2
KRT81	1.05969	3.78533e-174	1.27618e-169	0.418	0.04	3
COTL1	1.13137	4.82391e-163	1.62633e-158	0.637	0.134	3
ADGRG3	0.661959	5.13992e-157	1.73287e-152	0.338	0.024	3
KRT86	1.15967	5.09721e-156	1.71847e-151	0.516	0.087	3
LDLRAD4	1.15273	3.07131e-154	1.03546e-149	0.471	0.07	3
GZMK	1.28193	3.62594e-148	1.22245e-143	0.522	0.091	3
DUSP4	1.09964	2.1401e-146	7.21515e-142	0.389	0.044	3
ITM2C	1.05048	8.57917e-144	2.89238e-139	0.405	0.05	3
LDB2	0.463219	1.14139e-135	3.84808e-131	0.272	0.016	3
RGCC	1.33295	2.37351e-131	8.00204e-127	0.647	0.184	3
ITGA1	0.568292	2.28118e-123	7.69076e-119	0.259	0.017	3
SPRY2	0.857694	2.40912e-118	8.12209e-114	0.42	0.073	3
PDE4B	0.720208	7.28201e-118	2.45506e-113	0.433	0.076	3
SPRY1	0.491416	3.19156e-101	1.076e-96	0.253	0.024	3
KIR2DL4	0.744188	1.0273e-95	3.46345e-91	0.391	0.076	3
RGS1	0.952705	2.38928e-95	8.05523e-91	0.686	0.272	3
RGS16	0.836736	1.35214e-91	4.5586e-87	0.285	0.04	3
CAPG	0.838708	6.91435e-89	2.33111e-84	0.38	0.079	3
TMIGD2	0.719133	5.21279e-85	1.75744e-80	0.529	0.161	3
ACP5	0.547375	3.42549e-80	1.15487e-75	0.325	0.062	3
IL2RB	0.815969	6.3527e-80	2.14175e-75	0.828	0.537	3
KLRC1	0.79534	1.98056e-78	6.67727e-74	0.595	0.207	3
ZNF331	0.900481	1.25119e-75	4.21827e-71	0.633	0.259	3
ITGAE	0.744673	3.06251e-75	1.03249e-70	0.423	0.118	3
CLDND1	0.724108	2.84007e-74	9.57502e-70	0.573	0.215	3
PMEPA1	0.534421	4.14689e-73	1.39808e-68	0.306	0.06	3
CD7	0.697542	3.66156e-66	1.23446e-61	0.928	0.803	3
SLC7A5	0.678545	1.33646e-63	4.50573e-59	0.56	0.229	3
TNFRSF18	0.798551	2.65246e-62	8.94252e-58	0.414	0.13	3
CXCR3	0.586198	2.33049e-61	7.85701e-57	0.352	0.094	3
PDCD4	0.578965	3.14389e-61	1.05993e-56	0.647	0.287	3
NR4A1	0.818679	6.51031e-61	2.19489e-56	0.512	0.194	3
PPP1R14B	0.584276	1.36141e-60	4.58986e-56	0.397	0.12	3
JUND	0.847105	1.62928e-60	5.49296e-56	0.828	0.571	3
ATP8B4	0.405838	1.14399e-59	3.85684e-55	0.321	0.08	3
PLP2	0.540022	3.48762e-59	1.17582e-54	0.533	0.204	3
PFKFB3	0.466768	1.09605e-58	3.69523e-54	0.257	0.053	3
TBCD	0.558353	5.04737e-58	1.70167e-53	0.384	0.116	3
XCL1	0.744238	8.39646e-57	2.83078e-52	0.571	0.241	3
TMEM14C	0.347931	4.15608e-56	1.40118e-51	0.272	0.058	3
NFKB1	0.675362	1.96892e-55	6.63801e-51	0.592	0.274	3
CD96	0.543701	1.98867e-53	6.70459e-49	0.641	0.306	3
FOSB	0.7005	3.45256e-53	1.164e-48	0.681	0.358	3
YPEL5	0.720749	6.42697e-53	2.16679e-48	0.758	0.462	3
CXCR4	0.713221	7.84532e-53	2.64497e-48	0.89	0.615	3
HSP90AB1	0.648809	1.02235e-50	3.44674e-46	0.864	0.638	3
KDM6B	0.607569	1.0299e-50	3.47222e-46	0.412	0.147	3
SLC16A3	0.523826	5.92271e-50	1.99678e-45	0.439	0.164	3
IFRD1	0.753406	6.64374e-50	2.23987e-45	0.609	0.301	3
TENT5C	0.513867	6.92963e-50	2.33626e-45	0.573	0.249	3
VIM	0.729043	1.95452e-49	6.58947e-45	0.836	0.629	3
ARHGAP9	0.579943	2.64631e-49	8.92178e-45	0.722	0.442	3
GRAMD1A	0.379621	4.40224e-49	1.48417e-44	0.314	0.089	3
LDHA	0.611288	5.60229e-49	1.88876e-44	0.883	0.619	3
CKLF	0.710747	6.81638e-49	2.29808e-44	0.629	0.334	3
AREG	0.595348	1.30006e-47	4.38301e-43	0.544	0.235	3
RBPJ	0.495111	1.44155e-47	4.86004e-43	0.376	0.128	3
PDE7A	0.568088	1.1432e-46	3.85419e-42	0.505	0.223	3
CD44	0.604192	6.08372e-46	2.05107e-41	0.681	0.368	3
SAMSN1	0.492161	1.56851e-44	5.28807e-40	0.526	0.224	3
OXNAD1	0.344325	5.60521e-44	1.88974e-39	0.268	0.072	3
RPLP1	0.270744	1.04711e-43	3.53022e-39	1	0.988	3
PABPC1	0.462724	1.37999e-43	4.65249e-39	0.921	0.782	3
RANBP2	0.427703	6.84795e-43	2.30872e-38	0.406	0.154	3
ALOX5AP	0.49446	9.80235e-43	3.30476e-38	0.798	0.475	3
FAM177A1	0.539434	2.71161e-42	9.14193e-38	0.671	0.362	3
CSRNP1	0.55041	4.47019e-41	1.50708e-36	0.641	0.357	3
B3GNT7	0.390675	1.21003e-40	4.07949e-36	0.391	0.141	3
STK17A	0.487841	7.217e-40	2.43314e-35	0.775	0.503	3
BCL3	0.427745	7.32487e-40	2.46951e-35	0.378	0.141	3
ARL4A	0.418618	1.59549e-38	5.37903e-34	0.422	0.172	3
TIPARP	0.467275	2.15525e-38	7.26622e-34	0.444	0.194	3
TTC39C	0.334799	9.35078e-37	3.15252e-32	0.336	0.121	3
RASGEF1B	0.384341	1.95364e-36	6.58649e-32	0.344	0.127	3
TNFAIP3	0.531265	2.48757e-36	8.38658e-32	0.805	0.577	3
PHYKPL	0.481116	4.32317e-36	1.45751e-31	0.448	0.201	3
GATA3	0.455668	6.41661e-36	2.1633e-31	0.467	0.211	3
PPP1R16B	0.395138	7.4896e-36	2.52504e-31	0.374	0.152	3
LEPROTL1	0.436693	8.30639e-36	2.80042e-31	0.669	0.383	3
MCL1	0.489739	9.60595e-36	3.23855e-31	0.807	0.56	3
EZR	0.507252	2.04203e-35	6.8845e-31	0.635	0.374	3
AGO2	0.304162	3.88576e-35	1.31005e-30	0.336	0.123	3
PTMA	0.264396	3.91516e-35	1.31996e-30	0.996	0.982	3
SOCS1	0.412749	4.37744e-35	1.47581e-30	0.452	0.203	3
XCL2	0.444689	6.59894e-35	2.22477e-30	0.669	0.366	3
LTBP3	0.270681	1.07758e-34	3.63295e-30	0.285	0.095	3
PIK3R1	0.487013	1.11553e-34	3.76089e-30	0.658	0.384	3
RELB	0.383592	2.21598e-34	7.47095e-30	0.386	0.158	3
CD83	0.636567	2.44468e-34	8.24198e-30	0.329	0.127	3
AL135905.2	0.410198	3.78705e-34	1.27676e-29	0.357	0.144	3
GNAS	0.408673	4.47175e-34	1.50761e-29	0.756	0.51	3
UBE2S	0.528891	1.64714e-33	5.55316e-29	0.586	0.321	3
SFPQ	0.398339	2.44034e-33	8.22736e-29	0.771	0.489	3
CEBPD	0.536823	2.99636e-33	1.01019e-28	0.573	0.308	3
ZFP36	0.604644	3.32315e-33	1.12037e-28	0.894	0.768	3
DNAJA1	0.471864	4.45441e-33	1.50176e-28	0.752	0.478	3
ERGIC1	0.329179	3.43711e-32	1.15879e-27	0.367	0.151	3
TRAC	0.488167	3.47085e-32	1.17016e-27	0.319	0.123	3
DUSP10	0.415211	5.74626e-32	1.9373e-27	0.367	0.154	3
MYADM	0.579511	9.0587e-32	3.05405e-27	0.554	0.312	3
BTG1	0.406269	9.83392e-32	3.31541e-27	0.996	0.935	3
REL	0.536387	2.66398e-31	8.98135e-27	0.66	0.405	3
PHLDA1	0.463857	4.62067e-31	1.55781e-26	0.352	0.146	3
NAMPT	0.351721	4.90307e-31	1.65302e-26	0.318	0.122	3
TOX	0.353004	5.09099e-31	1.71638e-26	0.42	0.189	3
EML4	0.37067	7.13252e-31	2.40466e-26	0.495	0.245	3
SKIL	0.356969	1.05476e-30	3.55603e-26	0.399	0.176	3
SLC35E1	0.260138	1.09298e-30	3.68489e-26	0.253	0.084	3
NFKBIZ	0.577702	1.25317e-30	4.22494e-26	0.456	0.23	3
GAPDH	0.487314	1.424e-30	4.80087e-26	0.975	0.902	3
PIM3	0.522096	1.51336e-30	5.10213e-26	0.391	0.179	3
OTULIN	0.346082	2.26435e-30	7.63402e-26	0.393	0.176	3
CD69	0.590119	3.52301e-30	1.18775e-25	0.819	0.614	3
TCIRG1	0.406655	4.53149e-30	1.52775e-25	0.565	0.329	3
LIMS1	0.314698	1.00606e-29	3.39182e-25	0.301	0.114	3
AC008105.3	0.320014	1.01055e-29	3.40695e-25	0.265	0.095	3
STK17B	0.443336	1.31804e-29	4.44364e-25	0.713	0.487	3
LAT2	0.377676	1.79853e-29	6.06357e-25	0.533	0.287	3
ZC3H12A	0.401068	2.65238e-29	8.94222e-25	0.403	0.186	3
CTDP1	0.29977	2.71385e-29	9.14947e-25	0.272	0.099	3
CD151	0.296559	3.79945e-29	1.28095e-24	0.333	0.135	3
TUBB4B	0.383017	5.10973e-29	1.72269e-24	0.603	0.346	3
SFMBT2	0.288641	6.22145e-29	2.0975e-24	0.27	0.098	3
ZFP36L2	0.46138	7.83378e-29	2.64108e-24	0.919	0.779	3
NR4A2	0.565433	9.81867e-29	3.31027e-24	0.802	0.58	3
PLEKHO1	0.286423	1.49046e-28	5.02493e-24	0.261	0.092	3
SARAF	0.375306	1.70357e-28	5.74342e-24	0.898	0.706	3
PDE4A	0.284604	2.82404e-28	9.52097e-24	0.306	0.121	3
MAFF	0.418242	3.17902e-28	1.07178e-23	0.507	0.269	3
FOS	0.594742	5.18596e-28	1.7484e-23	0.807	0.588	3
ITM2A	0.393999	8.3498e-28	2.81505e-23	0.503	0.266	3
TRAF5	0.264979	2.24525e-27	7.56964e-23	0.306	0.12	3
IER5L	0.445704	4.02838e-27	1.35813e-22	0.267	0.104	3
ICAM1	0.401796	4.74635e-27	1.60019e-22	0.274	0.104	3
KDM5B	0.299498	1.22991e-26	4.14653e-22	0.318	0.13	3
SLC25A39	0.267837	1.45766e-26	4.91435e-22	0.425	0.201	3
SURF4	0.317699	1.61555e-26	5.44667e-22	0.461	0.232	3
NINJ1	0.39356	2.41154e-26	8.13028e-22	0.302	0.125	3
CD81	0.486793	3.42597e-26	1.15503e-21	0.654	0.472	3
ZBTB16	0.260743	7.32088e-26	2.46816e-21	0.423	0.206	3
UBC	0.318688	9.94514e-26	3.3529e-21	0.972	0.867	3
TNFSF14	0.33887	1.09542e-25	3.69309e-21	0.289	0.118	3
H3F3B	0.283364	1.2552e-25	4.23179e-21	0.996	0.961	3
SIK3	0.256263	1.32938e-25	4.48188e-21	0.327	0.141	3
VEGFB	0.268312	2.42452e-25	8.17404e-21	0.297	0.121	3
TSPYL2	0.372584	3.69379e-25	1.24532e-20	0.408	0.202	3
KLF10	0.345324	4.73584e-25	1.59664e-20	0.372	0.178	3
NUDT4	0.265856	5.39418e-25	1.81859e-20	0.31	0.132	3
IKZF3	0.369896	7.21e-25	2.43078e-20	0.503	0.278	3
ELL2	0.263517	9.84426e-25	3.31889e-20	0.263	0.102	3
SRSF2	0.379294	1.09425e-24	3.68916e-20	0.834	0.643	3
SLA2	0.304827	1.23032e-24	4.1479e-20	0.457	0.239	3
CCND2	0.474977	1.3602e-24	4.58578e-20	0.584	0.358	3
H2AFX	0.369906	1.36447e-24	4.60019e-20	0.418	0.217	3
LSP1	0.331867	4.71569e-24	1.58985e-19	0.892	0.756	3
FCER1G	0.311107	6.47382e-24	2.18258e-19	0.858	0.601	3
N4BP1	0.256771	1.30345e-23	4.39444e-19	0.319	0.14	3
IRF8	0.298418	1.34412e-23	4.53155e-19	0.312	0.137	3
EIF4A3	0.295022	1.40968e-23	4.75261e-19	0.439	0.225	3
NR4A3	0.413703	2.01879e-23	6.80616e-19	0.399	0.204	3
LCP2	0.352474	2.0923e-23	7.05397e-19	0.622	0.393	3
MAP4	0.27702	2.7278e-23	9.1965e-19	0.389	0.193	3
MIF	0.345684	3.63725e-23	1.22626e-18	0.905	0.721	3
CTSA	0.35668	4.28917e-23	1.44605e-18	0.374	0.187	3
PGK1	0.376771	5.1955e-23	1.75161e-18	0.713	0.509	3
OCIAD2	0.267238	7.17279e-23	2.41823e-18	0.425	0.212	3
EGR1	0.431402	1.6942e-22	5.71182e-18	0.284	0.123	3
FOSL2	0.359136	2.28009e-22	7.68709e-18	0.631	0.411	3
UBALD2	0.367541	3.67308e-22	1.23834e-17	0.524	0.318	3
CXXC5	0.266041	3.81475e-22	1.28611e-17	0.459	0.244	3
ETF1	0.27755	3.92725e-22	1.32403e-17	0.393	0.194	3
ABCB1	0.255893	5.88074e-22	1.98263e-17	0.253	0.103	3
DOCK8	0.285007	6.69172e-22	2.25605e-17	0.539	0.31	3
PPP1R15A	0.432446	7.21164e-22	2.43133e-17	0.699	0.49	3
HSPD1	0.448554	7.5878e-22	2.55815e-17	0.491	0.281	3
DUSP2	0.533155	7.69984e-22	2.59592e-17	0.819	0.647	3
GABARAPL1	0.292491	1.40795e-21	4.74675e-17	0.501	0.278	3
LMNA	0.624181	1.4602e-21	4.92292e-17	0.338	0.164	3
CTNNB1	0.250867	1.8777e-21	6.33047e-17	0.446	0.24	3
NFKBIA	0.466622	2.3651e-21	7.97371e-17	0.824	0.676	3
TGFB1	0.36981	2.38576e-21	8.04335e-17	0.807	0.594	3
AC044849.1	0.307612	3.78764e-21	1.27696e-16	0.395	0.204	3
ABLIM1	0.256951	3.87129e-21	1.30517e-16	0.318	0.147	3
IRF2BP2	0.294739	4.29165e-21	1.44689e-16	0.397	0.204	3
PTPN22	0.266919	6.65848e-21	2.24484e-16	0.505	0.287	3
ELF1	0.293853	6.9552e-21	2.34488e-16	0.673	0.442	3
GADD45B	0.387827	7.1979e-21	2.4267e-16	0.724	0.523	3
SNHG8	0.313463	8.72409e-21	2.94124e-16	0.516	0.298	3
CEBPZ	0.252919	1.52512e-20	5.14179e-16	0.361	0.179	3
GSTP1	0.339823	1.67816e-20	5.65774e-16	0.854	0.713	3
METRNL	0.367497	2.07995e-20	7.01235e-16	0.629	0.405	3
RPS6KA3	0.26506	2.41763e-20	8.15079e-16	0.376	0.19	3
SRGN	0.330365	2.70037e-20	9.10403e-16	0.987	0.94	3
PABPC4	0.250415	3.157e-20	1.06435e-15	0.301	0.138	3
GRK2	0.287257	3.48679e-20	1.17554e-15	0.539	0.323	3
GPI	0.335521	4.04804e-20	1.36476e-15	0.423	0.237	3
IFITM1	0.414181	4.82924e-20	1.62813e-15	0.802	0.632	3
LINC01578	0.304572	4.98816e-20	1.68171e-15	0.624	0.402	3
APOBEC3G	0.389676	6.88964e-20	2.32277e-15	0.698	0.483	3
AC020916.1	0.300938	9.93215e-20	3.34853e-15	0.544	0.335	3
MPG	0.270018	1.47361e-19	4.96811e-15	0.391	0.208	3
CHCHD10	0.263826	2.15858e-19	7.27743e-15	0.293	0.136	3
RPL22L1	0.272572	3.53007e-19	1.19013e-14	0.578	0.358	3
HSPH1	0.37726	4.83199e-19	1.62906e-14	0.433	0.246	3
FAM43A	0.292313	4.8422e-19	1.6325e-14	0.251	0.11	3
SQSTM1	0.28176	5.14276e-19	1.73383e-14	0.716	0.509	3
ALYREF	0.264277	9.90393e-19	3.33901e-14	0.389	0.212	3
IGFLR1	0.279028	1.22111e-18	4.11685e-14	0.382	0.203	3
ZFAND5	0.258596	1.30462e-18	4.3984e-14	0.49	0.287	3
SERTAD1	0.292751	1.7836e-18	6.01323e-14	0.561	0.345	3
G3BP2	0.33752	1.95025e-18	6.57508e-14	0.514	0.323	3
SH3BP1	0.265732	2.25923e-18	7.61676e-14	0.476	0.278	3
KPNA2	0.294853	2.46387e-18	8.3067e-14	0.284	0.133	3
DUSP1	0.397911	2.82907e-18	9.53791e-14	0.854	0.669	3
EIF4G2	0.281273	3.31984e-18	1.11925e-13	0.709	0.503	3
RBM38	0.305268	8.04279e-18	2.71155e-13	0.605	0.396	3
JUN	0.43292	8.20289e-18	2.76552e-13	0.798	0.605	3
PKM	0.359409	9.55244e-18	3.22051e-13	0.558	0.366	3
HSPE1	0.362097	1.03023e-17	3.47333e-13	0.699	0.49	3
RAB11FIP1	0.256816	1.31742e-17	4.44155e-13	0.395	0.215	3
JMJD6	0.254005	4.17568e-17	1.40779e-12	0.474	0.279	3
CHST11	0.260864	4.70784e-17	1.5872e-12	0.423	0.245	3
MTRNR2L12	0.2969	1.20306e-16	4.05599e-12	0.688	0.51	3
MATK	0.270762	1.78371e-16	6.01361e-12	0.728	0.527	3
SRSF7	0.271893	4.54932e-16	1.53376e-11	0.82	0.64	3
NXT1	0.252769	5.57977e-16	1.88117e-11	0.444	0.265	3
CNN2	0.275487	1.10894e-15	3.73869e-11	0.493	0.305	3
LGALS3	0.309617	5.42025e-15	1.82738e-10	0.323	0.178	3
PPP1R2	0.258028	5.74537e-15	1.93699e-10	0.52	0.333	3
HSPA8	0.293072	7.48792e-15	2.52448e-10	0.928	0.796	3
ADGRE5	0.290184	1.32125e-14	4.45448e-10	0.715	0.539	3
HSPA5	0.274417	2.06931e-14	6.97649e-10	0.75	0.56	3
AL138963.4	0.291337	2.16538e-14	7.30038e-10	0.401	0.238	3
CD63	0.264043	2.54129e-14	8.56772e-10	0.858	0.688	3
ANXA5	0.260811	3.31109e-14	1.1163e-09	0.267	0.136	3
CEMIP2	0.288659	4.90866e-14	1.65491e-09	0.401	0.243	3
VPS37B	0.288902	6.2591e-14	2.11019e-09	0.569	0.387	3
H1FX	0.306708	7.72842e-14	2.60556e-09	0.476	0.298	3
HIST1H4C	0.280104	1.17295e-13	3.95448e-09	0.539	0.356	3
HSPA1A	0.565155	4.04216e-13	1.36277e-08	0.422	0.266	3
MT-ND4L	0.300915	4.29498e-13	1.44801e-08	0.716	0.563	3
CRIP1	0.320201	3.03403e-11	1.02289e-06	0.909	0.826	3
HIST1H1E	0.280224	9.62071e-11	3.24353e-06	0.374	0.241	3
CD160	0.262335	1.01129e-10	3.40945e-06	0.357	0.223	3
BIRC3	0.281026	4.16427e-10	1.40394e-05	0.287	0.167	3
DNAJB1	0.388657	1.07185e-09	3.61364e-05	0.665	0.491	3
TUBA4A	0.360664	1.65138e-09	5.56747e-05	0.52	0.375	3
HSP90AA1	0.332634	2.81608e-09	9.49412e-05	0.887	0.791	3
CREM	0.296978	6.12695e-09	0.000206564	0.618	0.466	3
JUNB	0.299453	8.21349e-09	0.000276909	0.892	0.767	3
KLF6	0.284252	8.36865e-09	0.000282141	0.803	0.671	3
ATP1B3	0.273181	3.21691e-08	0.00108455	0.446	0.32	3
GZMA	0.519097	1.21582e-07	0.00409902	0.902	0.855	3
IL7R	1.84916	2.42971e-284	8.19154e-280	0.498	0.02	4
GPR183	1.06319	3.21487e-174	1.08386e-169	0.409	0.032	4
SPTSSB	0.655641	1.04736e-137	3.53106e-133	0.256	0.011	4
LTB	1.74577	5.9484e-132	2.00544e-127	0.541	0.11	4
TCF7	1.05087	3.77422e-129	1.27244e-124	0.474	0.077	4
SELL	1.29047	2.83226e-109	9.54869e-105	0.593	0.164	4
GZMK	0.989486	2.18483e-104	7.36594e-100	0.51	0.106	4
CAPG	0.755019	1.22764e-97	4.13886e-93	0.438	0.082	4
RPL13	0.468314	1.33727e-82	4.50848e-78	0.993	0.988	4
XCL1	1.41733	2.09456e-82	7.06162e-78	0.634	0.244	4
RPLP1	0.454325	2.88707e-78	9.73348e-74	0.998	0.989	4
TPT1	0.565564	9.90769e-76	3.34028e-71	0.99	0.973	4
RPS24	0.479598	1.81233e-73	6.1101e-69	0.993	0.962	4
EEF1A1	0.416121	1.08704e-71	3.66486e-67	1	0.99	4
RPS23	0.447046	1.17385e-70	3.95751e-66	0.981	0.969	4
RPS5	0.526218	7.29513e-69	2.45948e-64	0.974	0.922	4
RPS18	0.530484	1.73881e-67	5.86222e-63	0.988	0.985	4
RPL32	0.38653	2.04994e-65	6.91117e-61	0.995	0.981	4
TMEM123	0.762634	4.53667e-65	1.52949e-60	0.493	0.163	4
RPL8	0.464687	7.75982e-65	2.61614e-60	0.983	0.951	4
RPL11	0.38929	8.56829e-61	2.88871e-56	0.99	0.978	4
RPL19	0.364281	1.50154e-60	5.06229e-56	0.993	0.98	4
COTL1	0.739598	5.8605e-59	1.97581e-54	0.498	0.167	4
AREG	1.08482	7.88536e-57	2.65847e-52	0.579	0.241	4
RPS14	0.396882	1.67987e-56	5.66353e-52	1	0.984	4
EEF1G	0.634463	5.35883e-55	1.80668e-50	0.957	0.855	4
RPL10A	0.521173	1.128e-52	3.80296e-48	0.967	0.936	4
RPL41	0.296161	1.14333e-52	3.85464e-48	1	0.99	4
RPL34	0.373791	7.95866e-52	2.68318e-47	0.99	0.977	4
RPL9	0.453858	1.98017e-51	6.67596e-47	0.981	0.955	4
RPLP0	0.532303	2.50165e-51	8.43408e-47	0.957	0.897	4
CD44	0.746569	4.5099e-51	1.52047e-46	0.682	0.378	4
TNFRSF18	0.719234	2.76098e-50	9.30838e-46	0.421	0.138	4
RPL18	0.380638	1.44128e-49	4.85914e-45	0.983	0.966	4
GAS5	0.7326	3.70214e-49	1.24814e-44	0.754	0.472	4
RPS15A	0.334402	6.0561e-49	2.04175e-44	0.998	0.981	4
RPS4X	0.417628	5.48884e-48	1.85051e-43	0.995	0.974	4
KLRC1	0.730161	6.48693e-46	2.187e-41	0.541	0.226	4
RPL29	0.36031	1.31717e-45	4.44071e-41	0.981	0.959	4
RPS12	0.332874	1.42444e-45	4.80237e-41	0.99	0.979	4
XCL2	0.840193	2.25928e-45	7.61693e-41	0.682	0.375	4
FXYD5	0.779396	9.33185e-45	3.14614e-40	0.833	0.678	4
RPL10	0.301789	7.20619e-44	2.42949e-39	0.998	0.992	4
RPS8	0.372612	9.63969e-44	3.24992e-39	0.986	0.969	4
RPS9	0.429318	2.95633e-43	9.96698e-39	0.978	0.954	4
RPL18A	0.350477	4.18839e-43	1.41207e-38	0.988	0.974	4
RPSA	0.426033	2.31001e-42	7.78796e-38	0.962	0.916	4
RPS27A	0.29543	3.56623e-42	1.20232e-37	0.995	0.984	4
RPL35A	0.329419	7.65079e-42	2.57939e-37	0.986	0.963	4
RPS13	0.363467	1.04231e-40	3.51406e-36	0.974	0.958	4
RPL28	0.283689	1.86627e-40	6.29194e-36	1	0.981	4
RPL5	0.396608	2.1416e-40	7.22018e-36	0.962	0.923	4
EEF1B2	0.444171	3.10689e-40	1.04746e-35	0.919	0.813	4
RPS2	0.457236	4.62458e-40	1.55913e-35	0.99	0.973	4
RPL39	0.328538	5.64766e-38	1.90405e-33	0.993	0.968	4
RPS3A	0.338702	1.16475e-36	3.92685e-32	0.983	0.977	4
RPS6	0.361553	7.27589e-36	2.45299e-31	0.981	0.976	4
RACK1	0.351422	1.53814e-35	5.18568e-31	0.95	0.93	4
IGKC	0.739768	2.54475e-34	8.57937e-30	0.328	0.109	4
RPL12	0.323046	4.50349e-34	1.51831e-29	0.993	0.965	4
RPL17	0.387002	6.49922e-34	2.19115e-29	0.995	0.968	4
GSN	0.49283	2.66266e-32	8.97688e-28	0.347	0.131	4
SNHG29	0.543305	1.20223e-31	4.05319e-27	0.799	0.611	4
RPS7	0.284187	2.20428e-31	7.43151e-27	0.988	0.96	4
RPS3	0.26459	2.3099e-31	7.78759e-27	0.998	0.982	4
RPS19	0.288782	3.08044e-31	1.03854e-26	0.988	0.987	4
RPL26	0.280433	3.34998e-31	1.12941e-26	0.986	0.978	4
RPL36	0.305043	3.73201e-28	1.25821e-23	0.969	0.932	4
CXCR3	0.406116	4.4873e-28	1.51285e-23	0.299	0.109	4
SNHG32	0.503834	6.36572e-27	2.14614e-22	0.435	0.209	4
RPL24	0.29071	7.33466e-27	2.47281e-22	0.95	0.923	4
RPS25	0.278652	9.066e-27	3.05651e-22	0.978	0.966	4
MAFF	0.615915	1.05304e-25	3.55022e-21	0.498	0.277	4
MCUB	0.39274	1.24281e-25	4.19001e-21	0.289	0.11	4
RPLP2	0.340195	1.80665e-25	6.09093e-21	0.998	0.976	4
RPL3	0.297081	2.40271e-25	8.1005e-21	0.993	0.98	4
RPL13A	0.527815	2.95656e-25	9.96774e-21	0.959	0.925	4
RPL36A	0.386387	8.00799e-25	2.69981e-20	0.931	0.889	4
RPS28	0.281396	1.35229e-24	4.55911e-20	0.971	0.961	4
RPL6	0.271471	3.15113e-24	1.06237e-19	0.976	0.961	4
CD2	0.61497	7.98255e-23	2.69124e-18	0.598	0.417	4
RPL15	0.320764	9.45326e-23	3.18707e-18	0.978	0.969	4
RPS16	0.286768	1.21719e-22	4.10362e-18	0.981	0.95	4
PLP2	0.481732	7.19732e-22	2.4265e-17	0.433	0.226	4
NFKBIA	0.640724	6.43755e-21	2.17036e-16	0.809	0.683	4
RPL23A	0.338795	2.38571e-20	8.04317e-16	0.99	0.971	4
HINT1	0.383531	2.87866e-20	9.70513e-16	0.789	0.655	4
PABPC1	0.326109	1.39653e-19	4.70826e-15	0.902	0.789	4
RPL22	0.271177	1.9466e-18	6.56276e-14	0.914	0.872	4
IFITM3	0.526333	4.66768e-18	1.57366e-13	0.646	0.497	4
FOS	0.635031	5.20376e-18	1.7544e-13	0.766	0.6	4
RPL7	0.429963	8.60031e-18	2.89951e-13	0.94	0.898	4
RPL4	0.281741	1.30615e-17	4.40354e-13	0.909	0.86	4
RPL31	0.388078	1.40335e-17	4.73124e-13	0.935	0.912	4
NOP53	0.360444	1.42647e-17	4.80919e-13	0.806	0.685	4
NSMCE1	0.372497	4.52479e-17	1.52549e-12	0.333	0.169	4
LMNA	0.767712	5.43054e-17	1.83085e-12	0.33	0.171	4
SATB1	0.394341	1.18241e-16	3.98637e-12	0.337	0.177	4
BTF3	0.262629	3.53992e-16	1.19345e-11	0.904	0.841	4
PIM3	0.471053	1.20786e-15	4.07218e-11	0.344	0.191	4
GATA3	0.437891	4.73791e-14	1.59734e-09	0.378	0.23	4
MPG	0.319028	5.1299e-14	1.72949e-09	0.371	0.216	4
MT-ND2	0.402035	8.44579e-14	2.84741e-09	0.938	0.926	4
RPS10	0.350086	1.1036e-13	3.72066e-09	0.706	0.541	4
RPL27	0.259245	1.18873e-13	4.00769e-09	0.95	0.928	4
TRAF5	0.27585	1.29908e-13	4.37972e-09	0.263	0.131	4
RPL23	0.380628	1.41945e-13	4.78554e-09	0.849	0.79	4
NME2	0.338258	1.4746e-13	4.97147e-09	0.694	0.569	4
MT-ND1	0.339051	1.51264e-13	5.09971e-09	0.928	0.925	4
SMDT1	0.307277	1.60922e-13	5.42532e-09	0.529	0.354	4
RPS11	0.300871	2.70189e-13	9.10914e-09	0.94	0.904	4
SNHG5	0.413329	6.06563e-13	2.04497e-08	0.581	0.427	4
EIF3E	0.380704	6.21199e-13	2.09431e-08	0.641	0.499	4
EEF2	0.283524	8.08112e-13	2.72447e-08	0.883	0.8	4
SEPTIN11	0.300098	1.07155e-12	3.61263e-08	0.263	0.137	4
FOSB	0.802293	1.17982e-12	3.97763e-08	0.51	0.389	4
ZFAS1	0.294199	1.68248e-12	5.67231e-08	0.67	0.52	4
RPS17	0.409853	7.09527e-12	2.3921e-07	0.859	0.803	4
ZFP36L2	0.381429	1.09037e-11	3.67607e-07	0.849	0.792	4
BTG1	0.278154	1.3518e-11	4.55746e-07	0.945	0.943	4
AC020916.1	0.567944	2.92612e-11	9.86511e-07	0.483	0.349	4
TMEM14B	0.267857	9.81386e-11	3.30864e-06	0.337	0.201	4
ARL4A	0.381037	1.23931e-10	4.17819e-06	0.316	0.192	4
C1orf162	0.260474	1.49908e-10	5.05398e-06	0.39	0.244	4
PDCD4	0.253412	1.54029e-10	5.19295e-06	0.467	0.32	4
NPM1	0.253936	1.64786e-10	5.5556e-06	0.816	0.762	4
NUCB2	0.328151	1.72979e-10	5.83183e-06	0.344	0.216	4
EML4	0.289277	2.25942e-10	7.6174e-06	0.397	0.265	4
SLC16A3	0.302371	2.93029e-10	9.87919e-06	0.316	0.187	4
STK17A	0.314821	3.41601e-10	1.15167e-05	0.634	0.528	4
SMAP2	0.366838	3.58397e-10	1.2083e-05	0.4	0.28	4
SLC25A39	0.269071	6.12137e-10	2.06376e-05	0.344	0.218	4
RPS29	0.306426	6.73531e-10	2.27074e-05	0.945	0.923	4
RGS1	0.378018	1.00933e-09	3.40284e-05	0.464	0.312	4
RGCC	0.408409	1.59921e-09	5.39157e-05	0.361	0.233	4
NFKB1	0.342453	2.56609e-09	8.65131e-05	0.421	0.304	4
RPL22L1	0.29671	2.74787e-09	9.26418e-05	0.498	0.375	4
CD55	0.314386	4.5654e-09	0.000153918	0.416	0.291	4
RPS20	0.310279	5.21597e-09	0.000175851	0.859	0.807	4
BST2	0.314196	5.93865e-09	0.000200216	0.593	0.484	4
SEC11A	0.26439	6.97367e-09	0.00023511	0.548	0.428	4
CMC1	0.331189	1.01898e-08	0.00034354	0.718	0.634	4
KLRB1	0.349934	1.03278e-08	0.000348191	0.789	0.683	4
TRAPPC6A	0.255337	2.03318e-08	0.000685467	0.266	0.159	4
RPS4Y1	0.268588	2.11426e-08	0.000712802	0.679	0.611	4
PPP1R15A	0.488529	2.54451e-08	0.000857858	0.593	0.51	4
CTSA	0.250813	2.78444e-08	0.000938745	0.313	0.2	4
TRDC	0.370256	3.17241e-08	0.00106955	0.663	0.601	4
TAGLN2	0.356458	5.15356e-08	0.00173747	0.682	0.616	4
LDHB	0.252632	5.95692e-08	0.00200832	0.567	0.454	4
SNHG8	0.261501	6.54058e-08	0.00220509	0.435	0.315	4
SF1	0.26807	7.14955e-08	0.0024104	0.651	0.55	4
REL	0.324508	1.0738e-07	0.00362022	0.538	0.428	4
TMIGD2	0.251178	1.10396e-07	0.00372189	0.311	0.2	4
DUSP1	0.302911	1.82175e-07	0.00614185	0.77	0.685	4
NR4A1	0.672711	2.28073e-07	0.00768927	0.325	0.227	4
MT-CO1	1.077	2.47428e-62	8.34178e-58	1	0.994	5
MT-CO2	0.95879	4.83329e-53	1.62949e-48	0.994	0.992	5
MT-ATP6	1.0007	5.47562e-53	1.84605e-48	0.988	0.974	5
MT-CYB	1.0054	4.02512e-43	1.35703e-38	0.976	0.967	5
MT-CO3	0.942952	8.4185e-42	2.83821e-37	0.994	0.977	5
MT-ND1	0.910892	2.66726e-35	8.99239e-31	0.952	0.925	5
MT-ND3	0.887887	6.04715e-31	2.03874e-26	0.934	0.915	5
MT-ND5	1.10482	8.07401e-26	2.72207e-21	0.856	0.788	5
MT-ND4	0.747128	1.5811e-25	5.33051e-21	0.97	0.962	5
MT-ND4L	1.22834	3.59704e-21	1.21271e-16	0.719	0.578	5
MT-ND2	0.807405	1.34057e-20	4.51961e-16	0.97	0.925	5
MTRNR2L12	1.6474	2.66777e-19	8.99411e-15	0.677	0.528	5
MALAT1	0.501187	6.04689e-16	2.03865e-11	0.994	0.998	5
NEAT1	0.784595	5.65124e-13	1.90526e-08	0.76	0.73	5
MT-ND6	1.02177	1.36311e-10	4.59557e-06	0.497	0.375	5
SRRM2	0.681766	5.89298e-08	0.00198676	0.587	0.554	5
RNF213	0.806824	1.27708e-07	0.00430556	0.593	0.595	5

## Sheet: B cells
Table S2. List of genes specific to the cell clusters in total cells and each cell lineage.
gene	avg_logFC	p_val	p_val_adj	pct.1	pct.2	cluster
RPS27	0.37099	2.08594e-153	7.03255e-149	0.963	0.979	0
RPL34	0.350172	5.46987e-134	1.84411e-129	0.952	0.972	0
RPL13	0.304614	5.16899e-131	1.74267e-126	0.963	0.984	0
RPL32	0.304007	3.55124e-127	1.19727e-122	0.951	0.975	0
RPL18A	0.325747	7.30408e-127	2.4625e-122	0.945	0.972	0
RPL21	0.444731	1.86009e-125	6.27109e-121	0.948	0.97	0
RPS27A	0.294484	2.34283e-118	7.89862e-114	0.958	0.973	0
RPLP2	0.394014	8.06856e-117	2.72023e-112	0.951	0.964	0
RPS19	0.346078	3.54768e-112	1.19606e-107	0.957	0.983	0
RPS6	0.330879	3.96429e-109	1.33652e-104	0.953	0.972	0
RPL11	0.280676	9.47017e-106	3.19277e-101	0.953	0.972	0
RPL26	0.294668	1.49239e-104	5.03143e-100	0.939	0.966	0
RPL23A	0.354719	6.33337e-92	2.13523e-87	0.933	0.963	0
RPL13A	0.45794	1.29505e-90	4.36614e-86	0.938	0.957	0
RPL35	0.306355	4.07945e-90	1.37535e-85	0.909	0.952	0
RPL15	0.305193	9.70553e-90	3.27212e-85	0.93	0.965	0
IGHM	0.361248	1.36425e-89	4.59943e-85	0.594	0.442	0
RPS29	0.427009	8.4318e-89	2.8427e-84	0.902	0.937	0
RPL10A	0.304213	3.73023e-88	1.25761e-83	0.916	0.948	0
RPL9	0.30992	1.12457e-87	3.79138e-83	0.919	0.953	0
RPS18	0.268901	1.63358e-86	5.50745e-82	0.957	0.98	0
RPS11	0.382467	8.95037e-85	3.01753e-80	0.892	0.931	0
RPL12	0.263308	8.38326e-84	2.82633e-79	0.932	0.963	0
RPL17	0.296921	9.31543e-83	3.1406e-78	0.931	0.965	0
RPL31	0.449909	7.33829e-82	2.47403e-77	0.879	0.914	0
RPS23	0.255234	1.62018e-80	5.46227e-76	0.941	0.964	0
RPS25	0.259394	9.95505e-80	3.35625e-75	0.938	0.96	0
RPS9	0.265835	1.0583e-78	3.56796e-74	0.923	0.96	0
MALAT1	0.445063	2.6204e-77	8.83443e-73	0.967	0.964	0
RPL7	0.419844	3.96256e-76	1.33594e-71	0.895	0.929	0
CD52	0.365404	1.06297e-75	3.58371e-71	0.85	0.769	0
IGHD	0.538982	4.35946e-75	1.46975e-70	0.353	0.195	0
EEF1G	0.322572	1.17681e-71	3.96751e-67	0.895	0.934	0
HLA-DPB1	0.304877	3.5327e-70	1.19102e-65	0.876	0.786	0
RPS16	0.258569	5.82794e-66	1.96483e-61	0.919	0.96	0
RPL39	0.256603	6.29729e-65	2.12307e-60	0.935	0.958	0
CD37	0.303336	1.93182e-63	6.51293e-59	0.877	0.783	0
RPL27	0.313559	2.83613e-63	9.56173e-59	0.872	0.925	0
TCL1A	0.580586	6.12275e-61	2.06423e-56	0.311	0.167	0
HLA-DRA	0.270813	1.84115e-58	6.20725e-54	0.932	0.831	0
RPL22	0.267566	2.71742e-57	9.1615e-53	0.874	0.918	0
RPL27A	0.402097	3.8484e-57	1.29745e-52	0.886	0.926	0
UBA52	0.251998	7.72434e-57	2.60418e-52	0.885	0.934	0
RPL36A	0.298682	1.3813e-56	4.65691e-52	0.871	0.926	0
RPS20	0.424334	6.16047e-56	2.07694e-51	0.835	0.875	0
RPS17	0.484422	1.25432e-55	4.22882e-51	0.815	0.86	0
RPL38	0.317321	1.25043e-54	4.2157e-50	0.839	0.887	0
RPSA	0.256177	2.53343e-54	8.54122e-50	0.894	0.928	0
MT-ND4	0.3098	3.06121e-50	1.03206e-45	0.913	0.938	0
NOP53	0.332007	9.80179e-46	3.30458e-41	0.759	0.811	0
RPL23	0.333532	1.15578e-42	3.8966e-38	0.798	0.854	0
BTG1	0.27754	1.1864e-42	3.99984e-38	0.892	0.881	0
MT-ND3	0.33089	1.30276e-42	4.39211e-38	0.87	0.908	0
LTB	0.253461	5.64525e-41	1.90324e-36	0.786	0.677	0
MT-CO3	0.266438	4.74402e-39	1.5994e-34	0.94	0.95	0
MT-ND2	0.297502	2.09666e-38	7.0687e-34	0.897	0.932	0
RPS26	0.323477	1.37644e-34	4.64054e-30	0.831	0.889	0
RPS10	0.427782	9.47133e-33	3.19317e-28	0.68	0.704	0
CXCR4	0.286948	1.31536e-32	4.43459e-28	0.8	0.784	0
LINC00926	0.393551	1.28154e-29	4.3206e-25	0.437	0.355	0
CD79B	0.364197	1.11163e-27	3.74776e-23	0.637	0.639	0
VPREB3	0.298078	2.52675e-18	8.51868e-14	0.556	0.517	0
HLA-DMB	0.297931	3.3712e-15	1.13657e-10	0.515	0.485	0
PLAC8	0.304761	5.6044e-14	1.88947e-09	0.377	0.335	0
HLA-DQA2	0.265173	3.30615e-13	1.11463e-08	0.46	0.403	0
FOXP1	0.32761	4.2627e-13	1.43713e-08	0.429	0.399	0
FCER2	0.312399	5.45749e-11	1.83994e-06	0.285	0.24	0
SELL	0.252049	8.13867e-11	2.74387e-06	0.515	0.499	0
EIF3E	0.257063	3.61533e-10	1.21887e-05	0.637	0.723	0
SNHG5	0.280911	4.5695e-09	0.000154056	0.557	0.597	0
BCL11A	0.345902	2.90575e-07	0.00979644	0.276	0.253	0
EEF1A1	0.350494	8.67757e-133	2.92555e-128	0.999	0.979	1
TNFRSF13B	0.469646	5.85855e-127	1.97515e-122	0.531	0.226	1
CD82	0.430239	1.34242e-121	4.52585e-117	0.639	0.309	1
RPS12	0.350253	2.53968e-115	8.56229e-111	0.999	0.957	1
BANK1	0.42491	2.16701e-108	7.30584e-104	0.837	0.509	1
RPL14	0.317725	6.26654e-106	2.1127e-101	0.997	0.926	1
RPL30	0.321782	1.37044e-102	4.6203e-98	0.999	0.948	1
RPS8	0.3088	1.26249e-100	4.25637e-96	0.998	0.955	1
RPS28	0.311456	9.90019e-99	3.33775e-94	0.997	0.945	1
RPS21	0.34162	1.33479e-96	4.50012e-92	0.99	0.89	1
RPS14	0.293244	2.19199e-94	7.39009e-90	0.998	0.964	1
CD74	0.343206	2.76287e-93	9.31474e-89	0.994	0.947	1
RPLP1	0.260722	1.17552e-89	3.96316e-85	0.999	0.982	1
SYNGR2	0.386975	1.83676e-88	6.19246e-84	0.785	0.529	1
LINC01781	0.494449	1.87978e-88	6.3375e-84	0.407	0.173	1
LTB	0.379811	2.14149e-87	7.21983e-83	0.951	0.664	1
RPL39	0.304436	7.71745e-87	2.60186e-82	0.996	0.943	1
EEF2	0.31544	3.20908e-86	1.08191e-81	0.968	0.872	1
AIM2	0.370288	3.66852e-86	1.23681e-81	0.368	0.152	1
RPL41	0.267778	2.20339e-85	7.42849e-81	0.999	0.98	1
EEF1B2	0.315562	4.33746e-84	1.46233e-79	0.976	0.865	1
RPS3	0.279623	7.74043e-84	2.60961e-79	0.998	0.955	1
HLA-B	0.311923	2.64629e-83	8.92171e-79	0.993	0.937	1
ARHGAP24	0.311593	6.04751e-83	2.03886e-78	0.547	0.275	1
RPS23	0.293611	1.1428e-82	3.85282e-78	0.997	0.95	1
RPS15A	0.272706	7.33698e-82	2.47359e-77	0.997	0.958	1
KLF6	0.541934	1.20896e-81	4.0759e-77	0.833	0.649	1
COTL1	0.267657	2.61304e-81	8.80962e-77	0.806	0.494	1
MARCKS	0.468056	6.0596e-79	2.04293e-74	0.566	0.333	1
RAC2	0.328583	8.47211e-79	2.85629e-74	0.873	0.631	1
MS4A1	0.273561	3.77326e-77	1.27212e-72	0.961	0.662	1
RPS25	0.264451	7.30988e-75	2.46445e-70	0.997	0.946	1
SCIMP	0.329973	7.84802e-75	2.64588e-70	0.382	0.167	1
BLK	0.31239	8.85845e-75	2.98654e-70	0.555	0.292	1
CRIP1	0.315834	8.3438e-74	2.81303e-69	0.813	0.57	1
NAPSA	0.313437	1.1123e-72	3.75002e-68	0.439	0.212	1
SMIM14	0.3558	3.55938e-72	1.20001e-67	0.677	0.424	1
PABPC1	0.284455	5.23484e-72	1.76487e-67	0.972	0.832	1
TOMM7	0.277907	1.80536e-70	6.08659e-66	0.932	0.755	1
LY86	0.253117	4.64132e-70	1.56478e-65	0.63	0.344	1
RPL36	0.256119	2.13489e-69	7.19758e-65	0.993	0.929	1
GPR183	0.362823	1.68993e-68	5.69742e-64	0.616	0.369	1
KLF2	0.52171	5.36334e-68	1.8082e-63	0.712	0.498	1
CYBB	0.30873	3.17409e-67	1.07011e-62	0.461	0.236	1
PNRC1	0.356058	6.18355e-66	2.08472e-61	0.858	0.691	1
VIM	0.331942	8.09868e-66	2.73039e-61	0.833	0.626	1
RGS19	0.29741	8.33495e-64	2.81005e-59	0.555	0.321	1
CNPY3	0.293035	1.45596e-63	4.90863e-59	0.619	0.387	1
CD24	0.2793	6.96839e-63	2.34932e-58	0.582	0.326	1
PTPN6	0.276792	1.01149e-62	3.41015e-58	0.661	0.406	1
CTSH	0.305384	1.51387e-62	5.10387e-58	0.671	0.446	1
RPL37	0.254583	2.9952e-62	1.0098e-57	0.992	0.923	1
ACP5	0.29373	1.02988e-61	3.47213e-57	0.436	0.23	1
TXNIP	0.31494	1.35913e-61	4.58218e-57	0.745	0.502	1
CD37	0.272801	1.78745e-61	6.02619e-57	0.98	0.779	1
AHNAK	0.478463	1.09468e-59	3.6906e-55	0.48	0.283	1
HLA-DRA	0.273883	6.67053e-59	2.2489e-54	0.991	0.836	1
TSC22D3	0.344727	9.29515e-59	3.13377e-54	0.885	0.72	1
NEK6	0.252234	5.23157e-58	1.76377e-53	0.288	0.124	1
ZFP36L1	0.362689	6.35403e-58	2.1422e-53	0.769	0.543	1
CCDC50	0.29498	6.62203e-58	2.23255e-53	0.532	0.322	1
CLECL1	0.260086	1.02692e-57	3.46215e-53	0.316	0.142	1
SYPL1	0.253509	6.91889e-57	2.33264e-52	0.637	0.389	1
HLA-DPA1	0.256502	3.73854e-56	1.26041e-51	0.978	0.804	1
PTGES3	0.284399	5.07062e-56	1.70951e-51	0.71	0.5	1
HLA-DRB5	0.251275	7.44863e-56	2.51123e-51	0.924	0.654	1
FNBP1	0.261745	3.03124e-55	1.02195e-50	0.621	0.404	1
HSPA8	0.255547	9.46891e-55	3.19235e-50	0.887	0.703	1
IDS	0.296791	4.90551e-54	1.65384e-49	0.658	0.453	1
CTSZ	0.295836	4.55472e-53	1.53558e-48	0.552	0.358	1
TAGLN2	0.328392	4.66009e-53	1.5711e-48	0.775	0.6	1
SMAP2	0.313158	1.43296e-52	4.83108e-48	0.648	0.436	1
CMTM6	0.264537	1.70025e-52	5.73222e-48	0.595	0.376	1
IER5	0.349206	4.33969e-52	1.46308e-47	0.514	0.313	1
HSP90AB1	0.334907	4.67048e-52	1.57461e-47	0.894	0.756	1
PPP1R15A	0.388081	7.12792e-52	2.40311e-47	0.725	0.563	1
SWAP70	0.25173	9.90434e-52	3.33915e-47	0.604	0.368	1
SF1	0.25583	3.36751e-51	1.13532e-46	0.781	0.58	1
RESF1	0.255448	1.07351e-50	3.61924e-46	0.49	0.287	1
PIP4K2A	0.259072	4.83623e-50	1.63049e-45	0.363	0.191	1
BASP1	0.299226	5.66926e-50	1.91133e-45	0.571	0.373	1
SMARCB1	0.261124	6.09506e-50	2.05489e-45	0.597	0.401	1
CD19	0.273097	1.01309e-49	3.41552e-45	0.653	0.433	1
GRK6	0.257593	4.85227e-49	1.63589e-44	0.469	0.283	1
SEPTIN6	0.252827	5.29381e-49	1.78475e-44	0.639	0.433	1
TGFB1	0.288654	7.39394e-49	2.49279e-44	0.589	0.387	1
CD81	0.260485	9.7344e-49	3.28186e-44	0.573	0.374	1
EIF4B	0.272863	2.71489e-48	9.15299e-44	0.667	0.481	1
SRRM2	0.284929	2.79032e-48	9.40728e-44	0.712	0.531	1
RALGPS2	0.264801	1.69641e-47	5.71928e-43	0.611	0.407	1
MKNK2	0.278968	2.03497e-47	6.86069e-43	0.534	0.344	1
CD83	0.296188	2.29925e-47	7.75169e-43	0.719	0.49	1
BOD1L1	0.251359	4.13782e-46	1.39502e-41	0.486	0.297	1
JUND	0.492856	5.97324e-46	2.01382e-41	0.703	0.571	1
YWHAZ	0.269966	7.06137e-45	2.38067e-40	0.807	0.64	1
DUSP8	0.256201	8.197e-45	2.76354e-40	0.254	0.117	1
UBC	0.278275	1.24328e-44	4.19159e-40	0.949	0.858	1
MYH9	0.259334	2.69965e-44	9.1016e-40	0.544	0.345	1
MIDN	0.31279	1.04015e-43	3.50677e-39	0.48	0.298	1
ODC1	0.293976	3.22489e-43	1.08724e-38	0.6	0.425	1
GNAI2	0.255843	4.06753e-43	1.37133e-38	0.582	0.396	1
MT-ND4L	0.293387	3.20123e-42	1.07926e-37	0.698	0.535	1
EZR	0.328449	4.37899e-42	1.47633e-37	0.764	0.605	1
SEMA7A	0.295781	7.84945e-42	2.64636e-37	0.322	0.172	1
ADGRE5	0.279184	9.68837e-42	3.26634e-37	0.429	0.261	1
GRASP	0.285275	1.30587e-41	4.40261e-37	0.404	0.226	1
RASGEF1B	0.265854	1.53666e-40	5.18069e-36	0.457	0.275	1
LINC01578	0.256508	1.32904e-38	4.48071e-34	0.567	0.389	1
AL138963.4	0.282872	2.95356e-35	9.95763e-31	0.421	0.265	1
NR4A2	0.282473	4.19121e-35	1.41303e-30	0.634	0.456	1
ZFP36	0.298673	8.34733e-33	2.81422e-28	0.765	0.643	1
DUSP1	0.251331	2.05548e-32	6.92984e-28	0.784	0.647	1
FOSB	0.258813	1.55321e-27	5.2365e-23	0.603	0.466	1
NR4A1	0.296292	6.84718e-26	2.30846e-21	0.564	0.422	1
NFKBIA	0.283042	3.69963e-25	1.24729e-20	0.731	0.621	1
JUN	0.277059	1.54616e-22	5.21272e-18	0.784	0.677	1
CDKN1A	0.250645	4.60982e-19	1.55415e-14	0.495	0.385	1
HSPA1A	0.345341	3.32275e-16	1.12023e-11	0.341	0.243	1
HSPA1B	0.288288	3.33392e-10	1.124e-05	0.338	0.263	1
TNFSF9	0.932523	2.9802e-136	1.00474e-131	0.366	0.116	2
TNF	0.78484	4.97645e-113	1.67776e-108	0.28	0.079	2
PPP1R15A	0.742757	9.88339e-112	3.33208e-107	0.766	0.557	2
NR4A2	0.818746	8.17998e-108	2.7578e-103	0.703	0.446	2
NR4A1	0.927333	4.37522e-103	1.47506e-98	0.653	0.408	2
CD83	0.634273	4.86415e-102	1.6399e-97	0.766	0.484	2
IER5	0.675665	4.36917e-101	1.47302e-96	0.566	0.306	2
EEF1A1	0.314916	6.27096e-100	2.11419e-95	0.996	0.979	2
HSPA8	0.565198	8.86574e-99	2.989e-94	0.877	0.706	2
UBC	0.519763	4.51261e-98	1.52138e-93	0.96	0.857	2
EGR1	1.18538	1.12076e-96	3.77852e-92	0.388	0.165	2
HSP90AB1	0.69317	2.86926e-94	9.67344e-90	0.902	0.756	2
KLF6	0.631309	6.51012e-90	2.19482e-85	0.832	0.651	2
ZFP36	0.753003	1.68766e-89	5.68976e-85	0.805	0.637	2
RPL30	0.312435	5.81641e-89	1.96095e-84	0.99	0.95	2
PNRC1	0.451426	1.68053e-88	5.66574e-84	0.868	0.691	2
CD82	0.411958	1.03006e-85	3.47275e-81	0.598	0.319	2
FOSB	0.861655	8.54932e-85	2.88232e-80	0.653	0.459	2
RPS28	0.302317	1.06568e-84	3.59282e-80	0.99	0.947	2
DUSP1	0.662938	1.35794e-84	4.57816e-80	0.826	0.641	2
RPS12	0.314895	2.38436e-84	8.03865e-80	0.988	0.959	2
CD69	0.612499	1.99652e-82	6.73105e-78	0.778	0.526	2
NFKBIA	0.629404	1.11324e-80	3.75317e-76	0.788	0.612	2
RILPL2	0.48508	1.40651e-80	4.7419e-76	0.436	0.208	2
DUSP2	0.793084	4.88635e-79	1.64738e-74	0.584	0.354	2
H3F3B	0.456341	5.44559e-79	1.83593e-74	0.962	0.877	2
EIF1	0.354383	5.99573e-78	2.0214e-73	0.985	0.949	2
TNFRSF13B	0.374704	1.75674e-76	5.92266e-72	0.478	0.238	2
JUND	0.733072	3.60297e-75	1.2147e-70	0.734	0.567	2
KLF2	0.687356	2.8166e-74	9.49588e-70	0.707	0.501	2
SRSF7	0.478565	2.2885e-73	7.71546e-69	0.79	0.613	2
TPT1	0.267515	2.24176e-72	7.55787e-68	0.99	0.951	2
JUNB	0.512907	8.28014e-72	2.79157e-67	0.871	0.741	2
RPS8	0.273023	1.34318e-71	4.52841e-67	0.99	0.957	2
RPL39	0.286254	9.31676e-71	3.14105e-66	0.989	0.945	2
DNAJA1	0.645822	9.00891e-69	3.03726e-64	0.672	0.495	2
HLA-B	0.301304	1.51093e-68	5.09396e-64	0.987	0.939	2
BCL2A1	0.513937	1.76363e-68	5.94592e-64	0.48	0.256	2
DNAJB1	0.985562	6.84195e-68	2.3067e-63	0.587	0.393	2
HSPA1B	1.03048	7.44793e-68	2.511e-63	0.445	0.246	2
ZFP36L1	0.433558	8.28458e-68	2.79306e-63	0.772	0.545	2
NFKBID	0.458963	2.17536e-67	7.33402e-63	0.54	0.312	2
CD74	0.3016	2.01861e-66	6.80555e-62	0.993	0.947	2
BANK1	0.317364	6.30196e-66	2.12464e-61	0.798	0.519	2
PABPC1	0.286786	1.08024e-65	3.64191e-61	0.952	0.836	2
RPS15A	0.254471	2.51594e-65	8.48225e-61	0.992	0.959	2
HSPA1A	1.10387	6.13863e-65	2.06958e-60	0.42	0.23	2
EEF1B2	0.282242	1.59123e-62	5.36467e-58	0.957	0.87	2
HSP90AA1	0.746299	1.59369e-62	5.37298e-58	0.841	0.72	2
CDKN1A	0.589461	3.90795e-61	1.31753e-56	0.562	0.375	2
CD24	0.326744	1.55906e-60	5.25623e-56	0.576	0.329	2
RPS21	0.280538	1.92396e-60	6.48646e-56	0.979	0.893	2
TSC22D3	0.397796	3.95076e-59	1.33196e-54	0.869	0.724	2
SYNGR2	0.383929	8.2437e-59	2.77928e-54	0.737	0.539	2
YWHAZ	0.368898	1.75121e-58	5.90401e-54	0.811	0.641	2
EEF2	0.263128	2.21119e-58	7.45482e-54	0.96	0.874	2
IER2	0.612935	4.24847e-58	1.43233e-53	0.753	0.599	2
NR4A3	0.662212	4.38072e-58	1.47691e-53	0.341	0.166	2
MCM5	0.310112	5.24985e-58	1.76994e-53	0.343	0.166	2
CSRNP1	0.475293	6.26215e-57	2.11122e-52	0.515	0.326	2
SLBP	0.354801	6.8416e-57	2.30658e-52	0.414	0.227	2
CRIP1	0.334691	1.63379e-56	5.50817e-52	0.785	0.578	2
RASGEF1B	0.421947	3.46355e-56	1.1677e-51	0.478	0.273	2
MARCKS	0.401552	3.33134e-55	1.12313e-50	0.54	0.339	2
KDM6B	0.390401	4.13981e-55	1.39569e-50	0.539	0.327	2
JUN	0.655095	4.20963e-54	1.41924e-49	0.811	0.673	2
SQSTM1	0.372538	2.92978e-52	9.87745e-48	0.659	0.482	2
RGS19	0.285968	3.04948e-51	1.0281e-46	0.532	0.327	2
CMTM6	0.351928	6.61089e-51	2.2288e-46	0.583	0.38	2
MTRNR2L12	0.375081	1.43703e-50	4.8448e-46	0.666	0.468	2
GPR183	0.406586	4.41329e-50	1.4879e-45	0.573	0.379	2
ODC1	0.416537	5.12525e-50	1.72793e-45	0.593	0.428	2
SLC2A3	0.381188	1.25084e-48	4.21709e-44	0.616	0.402	2
HSPH1	0.624093	2.18337e-48	7.36102e-44	0.454	0.283	2
NAPSA	0.29811	2.41761e-48	8.15075e-44	0.403	0.22	2
TOMM7	0.25761	2.66973e-48	9.00071e-44	0.896	0.763	2
HLA-DPA1	0.258588	5.10192e-48	1.72006e-43	0.957	0.809	2
REL	0.303644	2.45404e-47	8.27354e-43	0.668	0.452	2
DDX5	0.257736	1.50533e-46	5.07507e-42	0.933	0.835	2
LINC01781	0.325792	1.79007e-46	6.03505e-42	0.356	0.184	2
CXCR5	0.353127	4.45014e-46	1.50032e-41	0.452	0.261	2
HNRNPDL	0.273109	9.34046e-45	3.14904e-40	0.789	0.641	2
TUBA1A	0.263136	1.24013e-44	4.18097e-40	0.567	0.369	2
YPEL5	0.456572	1.1764e-43	3.9661e-39	0.684	0.542	2
HLA-DRA	0.258087	1.3411e-43	4.52139e-39	0.983	0.839	2
DDX3Y	0.351067	1.96681e-43	6.63092e-39	0.375	0.217	2
EZR	0.359936	6.99463e-43	2.35817e-38	0.763	0.607	2
MIDN	0.364455	1.01808e-42	3.43236e-38	0.471	0.301	2
EIF5	0.348842	1.15299e-42	3.8872e-38	0.664	0.53	2
KLF10	0.39834	1.30697e-42	4.40632e-38	0.364	0.211	2
IDS	0.334949	1.46364e-42	4.9345e-38	0.624	0.461	2
MT-ND4L	0.260111	8.37748e-42	2.82439e-37	0.719	0.533	2
LY9	0.415412	1.28287e-40	4.32507e-36	0.562	0.389	2
VIM	0.26476	7.39945e-40	2.49465e-35	0.809	0.632	2
NFKB2	0.26539	2.01038e-39	6.77781e-35	0.492	0.324	2
AHNAK	0.384557	2.49761e-39	8.42044e-35	0.453	0.29	2
ZC3H12A	0.302	2.55563e-39	8.61605e-35	0.289	0.151	2
GRASP	0.288536	3.00681e-39	1.01372e-34	0.404	0.228	2
DDX3X	0.317931	3.07892e-39	1.03803e-34	0.519	0.363	2
DNAAF2	0.40046	3.20229e-39	1.07962e-34	0.328	0.19	2
TGFB1	0.313291	3.41332e-39	1.15077e-34	0.569	0.393	2
ARL4A	0.307229	5.49437e-39	1.85237e-34	0.448	0.277	2
IRF8	0.259886	3.68398e-38	1.24202e-33	0.595	0.388	2
SFPQ	0.293572	3.91188e-38	1.31885e-33	0.644	0.49	2
SRRM2	0.264559	7.04397e-38	2.3748e-33	0.681	0.538	2
WSB1	0.30283	1.43694e-37	4.8445e-33	0.557	0.401	2
PMAIP1	0.314385	1.62504e-37	5.47867e-33	0.499	0.332	2
CD55	0.316116	1.88418e-37	6.35232e-33	0.632	0.473	2
PTGES3	0.267218	2.23307e-37	7.52858e-33	0.658	0.51	2
GADD45B	0.495777	1.83789e-36	6.19626e-32	0.5	0.35	2
SERTAD1	0.388494	2.11691e-36	7.13696e-32	0.312	0.18	2
TAGLN2	0.297447	2.54042e-35	8.56477e-31	0.747	0.606	2
BCL2	0.268145	2.64387e-35	8.91356e-31	0.423	0.264	2
UBB	0.286879	3.74912e-35	1.26398e-30	0.901	0.818	2
AL138963.4	0.357492	6.89255e-35	2.32375e-30	0.419	0.266	2
BHLHE40	0.283928	1.18671e-34	4.00086e-30	0.31	0.175	2
FOS	0.591709	2.51542e-34	8.48048e-30	0.695	0.578	2
SEMA7A	0.390009	5.93388e-33	2.00055e-28	0.305	0.176	2
HSPE1	0.497973	6.81903e-33	2.29897e-28	0.653	0.536	2
HSPD1	0.563461	9.83977e-33	3.31738e-28	0.558	0.437	2
ALDOA	0.258986	1.25349e-32	4.226e-28	0.398	0.258	2
SBDS	0.280804	2.13523e-32	7.1987e-28	0.47	0.331	2
CHORDC1	0.292042	9.84774e-32	3.32007e-27	0.342	0.207	2
TAGAP	0.293519	1.02315e-31	3.44946e-27	0.615	0.458	2
MKNK2	0.274809	1.26962e-30	4.28039e-26	0.5	0.352	2
SAT1	0.252925	1.59844e-30	5.38899e-26	0.782	0.653	2
CCDC50	0.261194	2.46005e-30	8.29381e-26	0.476	0.334	2
ADGRE5	0.276811	7.62291e-29	2.56999e-24	0.402	0.267	2
RGS2	0.331335	8.75096e-29	2.9503e-24	0.452	0.309	2
MYC	0.432796	1.3453e-28	4.53554e-24	0.28	0.162	2
TSC22D2	0.257896	3.11934e-28	1.05165e-23	0.281	0.163	2
SF3B1	0.26077	5.7071e-28	1.92409e-23	0.548	0.419	2
CCR7	0.264489	8.6639e-28	2.92095e-23	0.486	0.324	2
EIF4A3	0.377433	6.37943e-27	2.15076e-22	0.366	0.25	2
CYCS	0.281986	1.49927e-26	5.05464e-22	0.593	0.485	2
BRD2	0.292126	1.89765e-26	6.39774e-22	0.554	0.432	2
ITGB1	0.323445	2.32096e-26	7.8249e-22	0.372	0.253	2
STIP1	0.272367	2.50845e-26	8.457e-22	0.307	0.193	2
MCL1	0.26019	6.12933e-26	2.06644e-21	0.608	0.484	2
DDIT3	0.276216	8.16839e-24	2.75389e-19	0.361	0.243	2
AREG	0.270916	8.22843e-22	2.77413e-17	0.312	0.2	2
PIM3	0.296217	6.3907e-20	2.15456e-15	0.468	0.362	2
RHOB	0.373074	1.26136e-19	4.25255e-15	0.396	0.294	2
BTG2	0.250407	1.86064e-19	6.27298e-15	0.707	0.601	2
ICAM1	0.283848	2.25848e-19	7.61425e-15	0.267	0.175	2
ZNF331	0.285302	3.78573e-19	1.27632e-14	0.452	0.339	2
CHMP1B	0.278601	1.65497e-18	5.57956e-14	0.365	0.258	2
ANKRD37	0.320592	3.82413e-18	1.28927e-13	0.258	0.172	2
NEU1	0.350943	6.58485e-15	2.22002e-10	0.27	0.201	2
JCHAIN	2.63482	0	0	0.802	0.288	3
IGHG1	2.56072	0	0	0.825	0.313	3
IGLC1	2.39814	0	0	0.832	0.184	3
IGHG4	2.34727	0	0	0.839	0.293	3
IGHG3	2.31604	0	0	0.83	0.305	3
MZB1	2.15174	0	0	0.969	0.187	3
XBP1	1.85622	0	0	0.968	0.196	3
SSR4	1.83629	0	0	0.985	0.59	3
DERL3	1.76596	0	0	0.945	0.139	3
FKBP11	1.6123	0	0	0.951	0.138	3
IGHGP	1.42631	0	0	0.398	0.023	3
TXNDC5	1.3717	0	0	0.813	0.134	3
PRDX4	1.3354	0	0	0.911	0.134	3
HSP90B1	1.31983	0	0	0.972	0.467	3
SEC11C	1.29459	0	0	0.931	0.239	3
ITM2C	1.22504	0	0	0.887	0.17	3
CYTOR	1.06944	0	0	0.748	0.074	3
SDF2L1	1.02888	0	0	0.891	0.127	3
MYDGF	0.956879	0	0	0.888	0.22	3
SSR3	0.912138	0	0	0.894	0.255	3
TRIB1	0.875946	0	0	0.711	0.045	3
SPCS3	0.828635	0	0	0.859	0.218	3
IGLV3-1	0.816282	0	0	0.438	0.029	3
MANF	0.799967	0	0	0.854	0.145	3
ANKRD28	0.797595	0	0	0.675	0.068	3
JSRP1	0.785698	0	0	0.564	0.033	3
SELENOS	0.780114	0	0	0.884	0.183	3
PDIA4	0.777551	0	0	0.798	0.136	3
CD38	0.773293	0	0	0.787	0.082	3
LMAN1	0.740179	0	0	0.838	0.192	3
HM13	0.721749	0	0	0.824	0.18	3
DNAJB9	0.720022	0	0	0.839	0.167	3
PRDM1	0.71605	0	0	0.616	0.035	3
RRBP1	0.710307	0	0	0.741	0.066	3
ERLEC1	0.70275	0	0	0.834	0.15	3
SDC1	0.700962	0	0	0.671	0.027	3
TNFRSF17	0.698269	0	0	0.704	0.074	3
NUCB2	0.683763	0	0	0.771	0.077	3
GADD45A	0.667091	0	0	0.492	0.071	3
CRELD2	0.644134	0	0	0.796	0.123	3
KDELR2	0.638608	0	0	0.837	0.187	3
GAS6	0.592998	0	0	0.64	0.03	3
CHPF	0.591912	0	0	0.635	0.024	3
TXNDC11	0.58557	0	0	0.724	0.11	3
TXNDC15	0.552633	0	0	0.748	0.102	3
SPAG4	0.541216	0	0	0.63	0.04	3
SLAMF7	0.495489	0	0	0.658	0.053	3
FNDC3B	0.491181	0	0	0.535	0.027	3
LIME1	0.479712	0	0	0.766	0.157	3
SEL1L	0.47707	0	0	0.687	0.09	3
LINC02362	0.464351	0	0	0.461	0.015	3
DNAJC1	0.43901	0	0	0.731	0.126	3
AC012236.1	0.429634	0	0	0.557	0.036	3
SEC61A1	0.420139	0	0	0.686	0.128	3
SRPRB	0.416816	0	0	0.708	0.101	3
FCRL5	0.407876	0	0	0.681	0.104	3
SIL1	0.402534	0	0	0.631	0.059	3
CD59	0.398239	0	0	0.725	0.117	3
ZBP1	0.395497	0	0	0.609	0.111	3
GLRX	0.382376	0	0	0.731	0.153	3
AQP3	0.369953	0	0	0.451	0.031	3
ARSA	0.361856	0	0	0.633	0.103	3
TMEM208	0.357105	0	0	0.708	0.148	3
DNAJC3	0.341408	0	0	0.658	0.12	3
CADM1	0.337796	0	0	0.426	0.028	3
MEI1	0.332571	0	0	0.6	0.074	3
GMPPB	0.327962	0	0	0.587	0.076	3
BSCL2	0.310993	0	0	0.62	0.087	3
PDK1	0.306921	0	0	0.514	0.078	3
FKBP2	0.305031	0	0	0.509	0.054	3
SPATS2	0.299118	0	0	0.577	0.086	3
CREB3L2	0.29066	0	0	0.485	0.058	3
ALG5	0.287469	0	0	0.659	0.109	3
NANS	0.286791	0	0	0.667	0.123	3
PECAM1	0.28538	0	0	0.506	0.068	3
FAM92B	0.284402	0	0	0.307	0.008	3
CHID1	0.279703	0	0	0.624	0.094	3
CAV1	0.263687	0	0	0.388	0.012	3
PLD3	0.256129	0	0	0.64	0.114	3
CALU	0.253767	0	0	0.549	0.069	3
CKAP4	0.2687	2.26221e-307	7.62681e-303	0.509	0.077	3
HDLBP	0.382746	9.01065e-302	3.03785e-297	0.614	0.119	3
CD63	0.543513	1.47734e-293	4.98069e-289	0.861	0.256	3
DNAJB11	0.332146	1.51133e-285	5.0953e-281	0.708	0.156	3
IFNAR2	0.270164	4.25213e-285	1.43356e-280	0.665	0.136	3
ERN1	0.282626	3.77161e-278	1.27156e-273	0.363	0.042	3
TPST2	0.252069	5.6817e-278	1.91553e-273	0.563	0.104	3
RPN2	0.615995	2.40073e-272	8.09382e-268	0.851	0.276	3
MAN1A1	0.277877	1.0117e-256	3.41083e-252	0.397	0.057	3
P4HB	0.555758	2.52175e-255	8.50181e-251	0.857	0.27	3
IFI6	0.811968	7.76731e-255	2.61867e-250	0.701	0.185	3
CITED2	0.696084	1.73861e-252	5.86155e-248	0.652	0.165	3
SELENOM	0.466257	2.88819e-247	9.73723e-243	0.744	0.204	3
PDIA6	0.590448	9.51656e-247	3.20841e-242	0.877	0.306	3
TMED9	0.497291	1.27977e-244	4.31461e-240	0.869	0.281	3
OSTC	0.394959	5.42139e-243	1.82777e-238	0.781	0.217	3
LMAN2	0.51326	1.91527e-240	6.45713e-236	0.863	0.286	3
SPCS2	0.664571	3.61678e-240	1.21936e-235	0.918	0.436	3
CCPG1	0.269316	1.865e-232	6.28765e-228	0.569	0.122	3
CLPTM1L	0.315466	5.15635e-230	1.73841e-225	0.572	0.13	3
KDELR1	0.39873	1.08311e-229	3.65159e-225	0.778	0.228	3
PHPT1	0.282278	4.3975e-223	1.48257e-218	0.781	0.217	3
TIMP1	0.276044	1.95499e-217	6.59106e-213	0.447	0.085	3
RABAC1	0.568993	1.39594e-214	4.70626e-210	0.905	0.368	3
SEC61B	0.665918	4.67615e-207	1.57652e-202	0.928	0.478	3
SRM	0.34526	9.82987e-207	3.31404e-202	0.696	0.195	3
PPIB	0.940397	1.06741e-206	3.59865e-202	0.913	0.474	3
PLPP5	0.258211	3.58477e-204	1.20857e-199	0.806	0.238	3
TMED10	0.418525	1.06948e-193	3.60566e-189	0.836	0.303	3
RPN1	0.428195	4.05634e-189	1.36756e-184	0.687	0.212	3
SPCS1	0.621042	1.99111e-184	6.71284e-180	0.898	0.486	3
TMEM59	0.516886	7.57238e-183	2.55295e-178	0.904	0.434	3
ERGIC3	0.344764	5.00379e-180	1.68698e-175	0.822	0.288	3
SEC61G	0.452877	9.77027e-176	3.29395e-171	0.851	0.331	3
HERPUD1	0.757887	5.03015e-174	1.69586e-169	0.966	0.641	3
TMED2	0.329065	3.42575e-168	1.15496e-163	0.81	0.285	3
ACADVL	0.306211	5.98707e-166	2.01848e-161	0.714	0.225	3
IGKC	2.31922	1.26011e-163	4.24832e-159	0.861	0.681	3
IFI27	0.456492	7.87344e-163	2.65445e-158	0.363	0.075	3
TMEM258	0.501903	3.28816e-159	1.10857e-154	0.886	0.408	3
HSPA5	0.725807	7.41793e-154	2.50088e-149	0.888	0.41	3
TRAM1	0.33246	9.14211e-154	3.08217e-149	0.817	0.309	3
IGKV4-1	2.69405	2.22453e-151	7.49977e-147	0.304	0.057	3
UBE2J1	0.412456	2.32236e-151	7.82962e-147	0.807	0.31	3
PTP4A3	0.303055	8.87809e-149	2.99316e-144	0.32	0.064	3
CD27	0.445212	6.91422e-148	2.33106e-143	0.765	0.301	3
PSAP	0.482705	1.14191e-147	3.84985e-143	0.904	0.456	3
GSTP1	0.44557	5.78001e-143	1.94867e-138	0.902	0.442	3
LGALS1	0.318965	9.70019e-143	3.27032e-138	0.817	0.315	3
ARF4	0.306763	1.38465e-140	4.66821e-136	0.773	0.289	3
NEAT1	0.775813	1.35012e-138	4.55178e-134	0.879	0.414	3
KRTCAP2	0.438997	9.55551e-133	3.22155e-128	0.89	0.453	3
PIM2	0.52156	4.02094e-131	1.35562e-126	0.805	0.354	3
SELENOK	0.398009	2.7859e-128	9.3924e-124	0.903	0.453	3
DDOST	0.329044	1.15671e-122	3.89974e-118	0.744	0.286	3
IGHA1	2.76534	2.0146e-118	6.79202e-114	0.766	0.382	3
ATF3	0.274846	6.99413e-117	2.358e-112	0.328	0.081	3
IGHA2	1.91156	3.53319e-111	1.19118e-106	0.428	0.141	3
DAD1	0.300932	2.18798e-110	7.37655e-106	0.85	0.383	3
COPE	0.296968	3.70082e-109	1.24769e-104	0.877	0.403	3
DUSP5	0.609678	6.08627e-106	2.05193e-101	0.468	0.168	3
RGS1	0.394249	8.65149e-103	2.91676e-98	0.681	0.302	3
IGHG2	1.75609	1.08689e-98	3.66436e-94	0.502	0.193	3
IGLC3	2.51253	3.37559e-98	1.13805e-93	0.655	0.327	3
IGLC2	2.38685	4.23686e-88	1.42842e-83	0.735	0.439	3
SUB1	0.328963	4.0643e-47	1.37024e-42	0.918	0.609	3
IGHM	1.09079	7.95766e-24	2.68285e-19	0.395	0.496	3
TCL1A	1.05041	7.44408e-297	2.5097e-292	0.725	0.159	4
IGHD	0.848611	5.12528e-240	1.72794e-235	0.72	0.195	4
FCER2	0.954513	2.69885e-213	9.09889e-209	0.682	0.213	4
IL4R	0.954556	1.60931e-180	5.42563e-176	0.5	0.127	4
IGHM	0.42087	2.06238e-168	6.9531e-164	0.934	0.442	4
YBX3	0.836578	4.1251e-136	1.39074e-131	0.496	0.161	4
BTG1	0.67478	3.54342e-128	1.19463e-123	0.981	0.875	4
BACH2	0.816029	6.50478e-123	2.19302e-118	0.495	0.174	4
RPL18A	0.412159	1.86174e-110	6.27669e-106	0.984	0.962	4
FOXP1	0.622983	7.65842e-108	2.58196e-103	0.736	0.376	4
COL19A1	0.501558	8.28958e-97	2.79475e-92	0.341	0.097	4
CD72	0.602905	6.18679e-96	2.08581e-91	0.481	0.18	4
CD79A	0.466811	4.99662e-91	1.68456e-86	0.964	0.823	4
NIBAN3	0.676287	6.99247e-91	2.35744e-86	0.546	0.245	4
AFF3	0.616196	7.11974e-91	2.40035e-86	0.596	0.287	4
CD37	0.476557	5.65834e-89	1.90765e-84	0.974	0.794	4
LAPTM5	0.484611	1.04512e-84	3.52351e-80	0.952	0.757	4
FCRL1	0.558731	1.68687e-82	5.68713e-78	0.478	0.2	4
LINC00926	0.642048	6.29355e-82	2.12181e-77	0.649	0.353	4
S1PR1	0.527476	2.35501e-81	7.93968e-77	0.342	0.112	4
CLEC2D	0.513065	9.55055e-76	3.21987e-71	0.526	0.241	4
HVCN1	0.534576	2.28968e-72	7.71944e-68	0.646	0.36	4
TMSB10	0.378007	6.43666e-72	2.17006e-67	0.989	0.939	4
FCMR	0.528276	3.76463e-71	1.26921e-66	0.741	0.466	4
RPS19	0.342475	2.03007e-69	6.84418e-65	0.99	0.974	4
CXCR4	0.507155	2.99144e-69	1.00853e-64	0.942	0.774	4
CAMK2D	0.418967	7.82438e-69	2.63791e-64	0.319	0.109	4
ZNF318	0.392291	9.61746e-67	3.24243e-62	0.28	0.089	4
CD69	0.598636	1.60385e-65	5.40722e-61	0.794	0.54	4
BIRC3	0.560638	8.01258e-64	2.70136e-59	0.721	0.484	4
PIK3IP1	0.461413	1.99094e-63	6.71227e-59	0.47	0.217	4
RFTN1	0.427422	3.01595e-60	1.0168e-55	0.383	0.159	4
SNX29	0.44002	1.02499e-59	3.45564e-55	0.442	0.208	4
PLEKHA2	0.447928	3.18826e-59	1.07489e-54	0.411	0.185	4
C1orf162	0.383437	6.7649e-59	2.28072e-54	0.368	0.147	4
PLPP5	0.555207	3.0964e-58	1.04392e-53	0.507	0.283	4
APLP2	0.433017	1.14606e-57	3.86382e-53	0.359	0.148	4
CD74	0.347962	2.62705e-57	8.85685e-53	0.999	0.95	4
CD52	0.377353	1.10371e-56	3.72105e-52	0.96	0.776	4
CD22	0.459825	2.23608e-56	7.53873e-52	0.586	0.329	4
VAV3	0.368724	2.56332e-55	8.64198e-51	0.293	0.106	4
HLA-DQB1	0.381881	3.97188e-54	1.33908e-49	0.927	0.747	4
CCR7	0.515917	1.90092e-53	6.40877e-49	0.573	0.326	4
RCSD1	0.479318	2.95804e-53	9.97273e-49	0.624	0.389	4
RUBCNL	0.505353	1.398e-52	4.7132e-48	0.484	0.257	4
RHOH	0.486801	1.99905e-52	6.7396e-48	0.684	0.479	4
CD79B	0.521111	3.39524e-51	1.14467e-46	0.811	0.622	4
TSPAN13	0.45411	9.67688e-51	3.26246e-46	0.439	0.23	4
CD83	0.645821	3.88784e-50	1.31075e-45	0.726	0.506	4
CDCA7L	0.374387	1.40231e-49	4.72776e-45	0.341	0.147	4
SELL	0.409222	2.81805e-49	9.50077e-45	0.727	0.482	4
SARAF	0.395428	1.01681e-48	3.42807e-44	0.828	0.712	4
NCF1	0.426261	1.48519e-48	5.00716e-44	0.743	0.578	4
HLA-DRB1	0.448993	2.03168e-48	6.84959e-44	0.898	0.76	4
SNX2	0.426939	3.74569e-47	1.26282e-42	0.661	0.445	4
RPL29	0.256937	4.3379e-47	1.46248e-42	0.985	0.941	4
CALHM6	0.416475	1.99031e-46	6.71013e-42	0.393	0.188	4
FOXO1	0.404086	3.87788e-46	1.30739e-41	0.345	0.16	4
HLA-DMB	0.38848	3.86525e-45	1.30313e-40	0.703	0.474	4
MTSS1	0.366522	4.85502e-45	1.63682e-40	0.335	0.147	4
PHACTR1	0.440113	9.20153e-45	3.1022e-40	0.498	0.278	4
LIMD2	0.357111	2.20117e-44	7.42104e-40	0.837	0.657	4
RPL13	0.25113	2.31514e-44	7.80526e-40	0.994	0.976	4
PMEPA1	0.505748	4.84408e-44	1.63313e-39	0.397	0.209	4
TMEM123	0.460067	8.34012e-44	2.81179e-39	0.522	0.324	4
RBM38	0.551802	1.05102e-43	3.5434e-39	0.569	0.376	4
SLC2A3	0.507076	8.71026e-43	2.93658e-38	0.628	0.415	4
ZCCHC7	0.407573	1.6367e-42	5.51796e-38	0.447	0.247	4
NCK2	0.33767	1.81344e-42	6.11383e-38	0.308	0.137	4
RPL37	0.271813	3.69728e-42	1.2465e-37	0.978	0.93	4
SNX9	0.45735	4.82064e-42	1.62523e-37	0.447	0.247	4
GPR18	0.352109	6.0611e-42	2.04344e-37	0.28	0.114	4
STK17A	0.447469	2.5953e-41	8.74978e-37	0.731	0.539	4
MS4A1	0.319875	3.90022e-41	1.31492e-36	0.921	0.688	4
RASGRP2	0.3533	4.12417e-41	1.39042e-36	0.512	0.294	4
HLA-DMA	0.356468	6.67463e-41	2.25029e-36	0.828	0.678	4
PDE4B	0.498639	8.00393e-41	2.69844e-36	0.586	0.407	4
ARRDC2	0.467383	8.03803e-41	2.70994e-36	0.449	0.254	4
RPS5	0.250063	9.69238e-41	3.26769e-36	0.979	0.94	4
HLA-DRA	0.289635	1.23382e-40	4.1597e-36	0.989	0.848	4
HLA-DQA1	0.379302	2.0899e-39	7.04588e-35	0.811	0.631	4
RPS27	0.253028	8.26981e-39	2.78808e-34	0.996	0.973	4
ADK	0.406703	2.00635e-37	6.7642e-33	0.4	0.22	4
EEF1D	0.257658	4.59815e-36	1.55022e-31	0.963	0.897	4
ARL4C	0.451655	4.9026e-36	1.65286e-31	0.351	0.176	4
C16orf74	0.362745	5.82069e-36	1.96239e-31	0.269	0.12	4
HLA-DPB1	0.273791	1.45898e-35	4.91882e-31	0.976	0.796	4
LYN	0.417846	1.8422e-35	6.2108e-31	0.552	0.374	4
NSD3	0.379092	8.0824e-35	2.7249e-30	0.576	0.411	4
RPL37A	0.251769	1.71579e-34	5.78463e-30	0.964	0.914	4
ZNF331	0.542416	1.79774e-34	6.06091e-30	0.525	0.339	4
HLA-DPA1	0.254854	2.40083e-34	8.09415e-30	0.967	0.818	4
TSPAN33	0.403207	2.64513e-34	8.91781e-30	0.38	0.21	4
PLEKHG1	0.304544	2.83123e-34	9.54521e-30	0.33	0.162	4
EVL	0.314061	1.17814e-33	3.97198e-29	0.659	0.467	4
STX7	0.339216	1.18008e-33	3.97852e-29	0.478	0.289	4
RPS26	0.396868	1.19062e-33	4.01404e-29	0.934	0.867	4
GRASP	0.433981	2.35846e-33	7.95132e-29	0.421	0.238	4
REL	0.384445	1.96876e-32	6.63746e-28	0.648	0.468	4
AC119396.1	0.289112	2.67674e-32	9.02437e-28	0.284	0.134	4
TGFBR2	0.349409	4.69741e-32	1.58368e-27	0.385	0.212	4
NOP53	0.278055	8.60454e-32	2.90093e-27	0.913	0.785	4
MARCH3	0.286071	1.011e-31	3.4085e-27	0.253	0.114	4
RIPOR2	0.379333	6.20262e-31	2.09115e-26	0.55	0.374	4
TAGAP	0.473939	9.9879e-31	3.36732e-26	0.617	0.468	4
KLF3	0.33026	1.58464e-30	5.34247e-26	0.272	0.131	4
HLA-DOA	0.301696	2.36151e-30	7.96159e-26	0.365	0.199	4
SP100	0.331007	6.27376e-30	2.11513e-25	0.649	0.505	4
ZBTB10	0.272264	1.41593e-29	4.77367e-25	0.308	0.157	4
JUNB	0.378611	1.77339e-29	5.97881e-25	0.829	0.754	4
CYB561A3	0.305577	3.51944e-29	1.18654e-24	0.428	0.256	4
MEF2C	0.354737	3.91264e-29	1.31911e-24	0.66	0.515	4
DGKD	0.285208	3.91914e-29	1.3213e-24	0.29	0.146	4
HIF1A	0.428963	5.51076e-29	1.8579e-24	0.457	0.297	4
KDM4B	0.371715	7.89064e-29	2.66025e-24	0.376	0.223	4
SLC38A1	0.342704	1.9521e-28	6.5813e-24	0.463	0.298	4
TLE5	0.378555	2.0325e-28	6.85236e-24	0.562	0.412	4
CLEC2B	0.331009	6.49201e-28	2.18872e-23	0.309	0.166	4
CYTIP	0.385784	6.99689e-28	2.35893e-23	0.661	0.547	4
BCL11A	0.272735	7.44975e-28	2.51161e-23	0.417	0.245	4
PAX5	0.315464	1.46481e-27	4.93845e-23	0.4	0.237	4
VPS37B	0.368388	9.64268e-27	3.25093e-22	0.429	0.274	4
ITPR1	0.295913	1.19052e-26	4.01373e-22	0.37	0.212	4
CXCR5	0.339569	2.095e-26	7.06308e-22	0.444	0.275	4
AC007384.1	0.336477	2.22405e-26	7.49816e-22	0.309	0.171	4
SMAP2	0.42006	2.24772e-26	7.57797e-22	0.586	0.458	4
CD55	0.367142	2.31755e-26	7.8134e-22	0.63	0.483	4
TENT5C	0.392106	2.57013e-26	8.66495e-22	0.524	0.377	4
ISG20	0.289376	2.96603e-26	9.99966e-22	0.738	0.584	4
RALGPS2	0.353989	5.54801e-26	1.87046e-21	0.577	0.425	4
P2RX5	0.300213	7.37417e-26	2.48613e-21	0.407	0.249	4
ADAM28	0.331498	3.42718e-25	1.15544e-20	0.571	0.412	4
BANK1	0.272002	4.29976e-25	1.44962e-20	0.721	0.545	4
HLA-DRB5	0.251734	6.29743e-25	2.12312e-20	0.868	0.679	4
SMCHD1	0.315667	9.68179e-25	3.26412e-20	0.584	0.437	4
ZFP36L1	0.33152	2.1316e-24	7.18649e-20	0.72	0.564	4
CCND3	0.283478	3.25006e-24	1.09573e-19	0.454	0.292	4
IRF8	0.2655	3.34777e-24	1.12867e-19	0.586	0.402	4
CD19	0.289312	7.00545e-24	2.36182e-19	0.605	0.454	4
GNA13	0.326385	7.25471e-24	2.44585e-19	0.38	0.241	4
ETS1	0.283729	1.03096e-23	3.47576e-19	0.385	0.233	4
LY9	0.370261	1.53307e-23	5.1686e-19	0.551	0.401	4
POLD4	0.263761	1.5664e-23	5.28098e-19	0.7	0.585	4
SSH2	0.310413	2.40508e-23	8.10849e-19	0.418	0.274	4
PRKCB	0.306413	3.12907e-23	1.05494e-18	0.519	0.366	4
LINC02397	0.304135	3.5868e-23	1.20926e-18	0.314	0.174	4
NFKB1	0.412852	5.44721e-23	1.83647e-18	0.459	0.318	4
CIITA	0.273924	5.67133e-23	1.91203e-18	0.387	0.235	4
IRF4	0.381486	1.23962e-22	4.17926e-18	0.3	0.176	4
IQSEC1	0.278687	2.08938e-22	7.04415e-18	0.292	0.163	4
SMAD7	0.305658	6.45938e-22	2.17772e-17	0.344	0.206	4
BTK	0.294708	7.0917e-22	2.3909e-17	0.403	0.266	4
RNASE6	0.37078	1.03422e-21	3.48677e-17	0.336	0.21	4
PTPRC	0.253669	1.09129e-21	3.67916e-17	0.694	0.558	4
PACS1	0.266146	2.28161e-21	7.69223e-17	0.314	0.186	4
VPREB3	0.328891	2.46086e-21	8.29655e-17	0.679	0.514	4
LTA4H	0.305583	4.5916e-21	1.54801e-16	0.356	0.23	4
UCP2	0.270374	4.72921e-21	1.59441e-16	0.619	0.484	4
MBNL1	0.321616	5.4986e-21	1.8538e-16	0.535	0.405	4
SWAP70	0.28294	1.19258e-20	4.02065e-16	0.547	0.391	4
NSMCE3	0.341845	1.41888e-20	4.78361e-16	0.366	0.238	4
CHI3L2	0.297848	1.73395e-20	5.84585e-16	0.259	0.14	4
STRBP	0.298536	2.62509e-20	8.85022e-16	0.377	0.251	4
PLAC8	0.29444	3.24404e-20	1.09369e-15	0.478	0.334	4
TAF1D	0.274455	3.97634e-20	1.34058e-15	0.571	0.453	4
IL16	0.259162	6.11931e-20	2.06307e-15	0.485	0.349	4
SH3BP5	0.27473	1.33712e-19	4.50798e-15	0.422	0.29	4
CHMP1B	0.339171	1.68519e-19	5.68143e-15	0.398	0.262	4
CD40	0.273826	1.71834e-19	5.79323e-15	0.506	0.372	4
SNHG7	0.2768	2.28307e-19	7.69715e-15	0.574	0.439	4
EBLN3P	0.283135	2.67197e-19	9.00829e-15	0.401	0.275	4
NFKBID	0.322079	3.72128e-19	1.25459e-14	0.475	0.333	4
SELENOH	0.272984	5.1321e-19	1.73024e-14	0.654	0.557	4
BTG2	0.292374	9.44924e-19	3.18572e-14	0.702	0.608	4
BLOC1S2	0.254185	1.84471e-18	6.21925e-14	0.355	0.23	4
LBH	0.258773	2.0098e-18	6.77586e-14	0.449	0.306	4
CHPT1	0.274964	2.39326e-18	8.06862e-14	0.372	0.249	4
IRF1	0.329141	4.31083e-18	1.45335e-13	0.592	0.479	4
MYADM	0.363458	6.53443e-18	2.20302e-13	0.354	0.227	4
PALM2-AKAP2	0.354073	1.63445e-17	5.51038e-13	0.434	0.325	4
MTPN	0.274513	2.12886e-17	7.17723e-13	0.493	0.379	4
ZFP36L2	0.29214	4.58913e-17	1.54718e-12	0.727	0.638	4
SEC62	0.259331	2.42983e-16	8.19191e-12	0.613	0.515	4
HIST1H1E	0.361339	6.37546e-16	2.14942e-11	0.368	0.252	4
MAP3K8	0.28421	7.06399e-16	2.38155e-11	0.418	0.303	4
ANKRD44	0.258664	9.03463e-16	3.04593e-11	0.483	0.36	4
PRR7	0.257692	9.73994e-16	3.28372e-11	0.262	0.16	4
LRRFIP1	0.257311	1.79774e-15	6.0609e-11	0.55	0.439	4
KIAA0040	0.270866	2.93329e-15	9.8893e-11	0.283	0.182	4
FOS	0.407866	2.99646e-15	1.01023e-10	0.679	0.587	4
BLNK	0.273371	7.13964e-15	2.40706e-10	0.457	0.349	4
KDM6B	0.264471	9.86187e-15	3.32483e-10	0.467	0.348	4
LINC01578	0.261362	1.9066e-13	6.42792e-09	0.507	0.408	4
LSM7	0.286845	3.10437e-13	1.04661e-08	0.587	0.512	4
EIF2AK3	0.292225	1.82537e-12	6.15406e-08	0.254	0.171	4
MT-ND4L	0.262033	1.82723e-12	6.16033e-08	0.63	0.553	4
ATF7IP	0.250792	2.58697e-12	8.72171e-08	0.381	0.281	4
TSTD1	0.256763	5.74114e-12	1.93557e-07	0.431	0.342	4
JUND	0.295348	9.8136e-12	3.30856e-07	0.646	0.586	4
IRF2BP2	0.285478	1.19392e-11	4.02517e-07	0.372	0.286	4
PIM3	0.318928	2.86997e-11	9.67582e-07	0.448	0.37	4
UBALD2	0.311428	5.60131e-11	1.88842e-06	0.478	0.406	4
RGS16	0.279228	1.80033e-09	6.06963e-05	0.275	0.194	4
GADD45B	0.275482	1.72539e-08	0.000581698	0.439	0.366	4
CCL5	3.25919	0	0	0.777	0.098	5
NKG7	2.63272	0	0	0.613	0.033	5
IL32	2.60549	0	0	0.824	0.07	5
GZMA	2.59211	0	0	0.692	0.021	5
GZMK	2.38435	0	0	0.526	0.014	5
CD3D	2.12296	0	0	0.739	0.038	5
CST7	2.10847	0	0	0.606	0.017	5
ANXA1	1.9786	0	0	0.615	0.063	5
GZMH	1.96589	0	0	0.46	0.009	5
TRBC1	1.93766	0	0	0.509	0.032	5
CD2	1.74983	0	0	0.615	0.02	5
CTSW	1.72452	0	0	0.474	0.027	5
CD3E	1.72307	0	0	0.592	0.022	5
CD7	1.62807	0	0	0.486	0.022	5
CD8A	1.5082	0	0	0.357	0.01	5
FYB1	1.36015	0	0	0.5	0.035	5
GZMM	1.30859	0	0	0.413	0.013	5
CD3G	1.25031	0	0	0.394	0.01	5
BCL11B	1.23476	0	0	0.394	0.017	5
CD8B	1.14152	0	0	0.291	0.006	5
GIMAP7	0.867644	0	0	0.286	0.01	5
LAT	1.04854	2.8658e-281	9.66174e-277	0.34	0.02	5
ID2	1.64395	1.91128e-264	6.4437e-260	0.493	0.055	5
CD247	0.919772	9.25577e-243	3.12049e-238	0.329	0.022	5
HCST	1.57658	1.29324e-180	4.36004e-176	0.681	0.185	5
SRGN	2.19727	8.82497e-180	2.97525e-175	0.878	0.415	5
LEPROTL1	1.51131	8.97012e-177	3.02419e-172	0.662	0.179	5
GZMB	1.64617	3.1292e-167	1.05498e-162	0.289	0.028	5
ITM2A	1.5363	1.09413e-146	3.68875e-142	0.498	0.11	5
RGCC	1.74558	7.38186e-143	2.48872e-138	0.629	0.189	5
B2M	0.923912	6.66637e-134	2.2475e-129	1	0.993	5
CD6	0.86578	5.83146e-133	1.96602e-128	0.3	0.039	5
FYN	1.17307	2.01241e-128	6.78465e-124	0.467	0.104	5
TRAC	1.67054	2.9182e-125	9.83843e-121	0.596	0.183	5
CCL4	1.85198	8.62611e-121	2.90821e-116	0.347	0.06	5
LCK	1.01849	1.04427e-114	3.52064e-110	0.472	0.115	5
CD96	0.852082	1.50734e-111	5.08184e-107	0.258	0.034	5
AAK1	0.77237	3.30383e-111	1.11385e-106	0.256	0.034	5
KLRK1	0.91782	4.35468e-108	1.46814e-103	0.277	0.041	5
CREM	2.0755	6.19301e-105	2.08791e-100	0.646	0.275	5
DUSP4	1.30677	1.01701e-104	3.42874e-100	0.404	0.092	5
S100A4	1.43378	7.6247e-95	2.57059e-90	0.716	0.368	5
HLA-A	0.803349	7.86294e-95	2.65091e-90	0.991	0.945	5
SLA	0.973719	2.34004e-85	7.8892e-81	0.324	0.07	5
LDHA	1.28972	8.18122e-76	2.75822e-71	0.695	0.419	5
TNFAIP3	1.24985	3.25487e-70	1.09735e-65	0.57	0.264	5
TMSB4X	0.731572	7.46387e-70	2.51637e-65	0.991	0.971	5
CRIP1	0.996831	9.68386e-68	3.26482e-63	0.843	0.597	5
HLA-C	0.602991	3.9243e-64	1.32304e-59	0.986	0.942	5
SH3BGRL3	0.883209	4.80958e-61	1.6215e-56	0.833	0.742	5
RORA	0.737558	5.54846e-58	1.87061e-53	0.268	0.066	5
DUSP2	0.970232	1.11019e-57	3.74291e-53	0.66	0.374	5
LYAR	0.837956	2.02327e-54	6.82126e-50	0.275	0.074	5
TUBA4A	1.21497	5.17288e-53	1.74398e-48	0.585	0.332	5
ATP1B3	1.24834	1.6967e-51	5.72027e-47	0.446	0.198	5
SARAF	0.836201	5.26185e-51	1.77398e-46	0.84	0.716	5
GAPDH	0.623904	1.90029e-50	6.40664e-46	0.878	0.826	5
TRBC2	1.27734	3.2521e-50	1.09641e-45	0.599	0.352	5
ZFP36L2	0.842499	3.64425e-49	1.22862e-44	0.81	0.638	5
PLAAT4	0.822293	2.49089e-48	8.39779e-44	0.453	0.203	5
HLA-B	0.476314	2.89505e-47	9.76039e-43	0.993	0.943	5
CNOT6L	0.963215	1.29045e-46	4.35063e-42	0.387	0.158	5
TNFRSF1B	0.830326	3.49184e-46	1.17724e-41	0.329	0.116	5
CXCR3	0.79888	2.14646e-45	7.23658e-41	0.27	0.082	5
CXCR4	0.737216	7.01975e-45	2.36664e-40	0.906	0.783	5
NEAT1	0.925488	1.53348e-44	5.16996e-40	0.674	0.457	5
LIME1	1.00038	9.03445e-44	3.04587e-39	0.446	0.215	5
SRSF2	0.923513	1.19849e-43	4.04058e-39	0.697	0.543	5
S100A6	0.687628	3.11355e-42	1.0497e-37	0.721	0.549	5
AC016831.5	0.89147	3.36061e-41	1.133e-36	0.284	0.097	5
RUNX3	0.87665	2.73265e-40	9.21285e-36	0.408	0.186	5
RGS1	0.855602	1.43251e-38	4.82957e-34	0.57	0.334	5
C12orf75	0.783572	1.42081e-37	4.79013e-33	0.336	0.135	5
PPP2R5C	0.864928	2.93089e-36	9.8812e-32	0.453	0.24	5
ARL4C	0.66667	2.03816e-35	6.87144e-31	0.399	0.181	5
SPOCK2	0.876961	2.25307e-34	7.59599e-30	0.352	0.155	5
LINC-PINT	0.881423	4.14758e-34	1.39832e-29	0.538	0.338	5
APMAP	0.711566	1.33373e-33	4.49652e-29	0.261	0.094	5
MCL1	0.781957	1.60188e-33	5.40059e-29	0.66	0.495	5
APOBEC3G	0.937714	4.33955e-33	1.46304e-28	0.406	0.21	5
MYL6	0.631108	8.73542e-33	2.94506e-28	0.805	0.802	5
CYTOR	0.691707	4.11026e-32	1.38573e-27	0.326	0.142	5
JMJD6	0.791443	4.20214e-32	1.41671e-27	0.31	0.132	5
SAMSN1	0.825311	4.85448e-32	1.63664e-27	0.46	0.258	5
MALAT1	0.353167	7.22575e-32	2.43609e-27	0.993	0.963	5
ALOX5AP	0.97884	1.74216e-31	5.87353e-27	0.486	0.285	5
PTPRC	0.735219	5.63305e-31	1.89913e-26	0.714	0.562	5
LMNA	1.01699	5.29159e-30	1.78401e-25	0.448	0.253	5
CALM1	0.650818	6.26915e-30	2.11358e-25	0.735	0.677	5
PFN1	0.470789	1.28611e-29	4.33598e-25	0.862	0.846	5
CLEC2B	0.777183	5.02641e-29	1.69461e-24	0.352	0.17	5
CD99	0.817738	1.6671e-28	5.62046e-24	0.589	0.445	5
S100A10	0.702923	3.31202e-28	1.11661e-23	0.556	0.381	5
FAM177A1	0.915598	3.92845e-28	1.32444e-23	0.453	0.28	5
DDIT4	0.857149	4.62794e-28	1.56026e-23	0.474	0.284	5
CD44	0.684852	5.66607e-28	1.91026e-23	0.662	0.521	5
ITGB2	0.740885	6.70003e-28	2.25885e-23	0.472	0.286	5
H3F3B	0.400721	1.89927e-27	6.40321e-23	0.918	0.888	5
ITM2B	0.658621	1.0511e-26	3.54368e-22	0.678	0.597	5
COTL1	0.654176	1.55842e-26	5.25407e-22	0.676	0.536	5
TMSB10	0.303858	4.00422e-26	1.34998e-21	0.953	0.943	5
EIF1	0.333814	6.26108e-26	2.11086e-21	0.953	0.955	5
CFL1	0.43155	2.04396e-25	6.89102e-21	0.845	0.831	5
MT-ND2	0.464068	3.7884e-24	1.27722e-19	0.941	0.921	5
MYADM	0.6006	4.5884e-24	1.54693e-19	0.413	0.23	5
EIF4A1	0.58875	1.34391e-23	4.53085e-19	0.728	0.644	5
DNAJB6	0.732898	1.07103e-22	3.61089e-18	0.5	0.353	5
ARHGDIB	0.489595	1.93381e-22	6.51964e-18	0.803	0.766	5
CHST12	0.799319	5.84839e-22	1.97173e-17	0.289	0.144	5
HLA-E	0.376513	2.92739e-21	9.8694e-17	0.915	0.889	5
SLC7A5	0.817347	2.15061e-20	7.25056e-16	0.324	0.181	5
H2AFZ	0.71765	4.57622e-20	1.54283e-15	0.585	0.475	5
VIM	0.552002	9.41053e-20	3.17267e-15	0.728	0.654	5
SUB1	0.519666	1.13311e-19	3.82016e-15	0.692	0.641	5
BTG1	0.299844	1.1474e-19	3.86836e-15	0.944	0.881	5
CLEC2D	0.651821	2.03083e-18	6.84673e-14	0.415	0.259	5
YPEL5	0.4548	8.06248e-18	2.71818e-13	0.667	0.557	5
CALM2	0.529327	8.93199e-18	3.01133e-13	0.716	0.7	5
PIK3R1	0.609063	9.12145e-18	3.0752e-13	0.275	0.142	5
CTSC	0.697139	2.99532e-17	1.00984e-12	0.291	0.162	5
KPNA2	0.659267	2.30845e-16	7.7827e-12	0.256	0.134	5
UBB	0.408402	3.6145e-16	1.21859e-11	0.819	0.83	5
FTH1	0.474228	3.91904e-16	1.32127e-11	0.965	0.968	5
SYNE2	0.531378	4.31479e-16	1.45469e-11	0.284	0.154	5
CTSD	0.622801	6.16319e-16	2.07786e-11	0.352	0.222	5
GUK1	0.593196	6.61211e-16	2.22921e-11	0.566	0.501	5
UBC	0.258797	2.07129e-15	6.98314e-11	0.913	0.87	5
EVL	0.494237	3.67084e-15	1.23759e-10	0.573	0.479	5
CORO1B	0.581088	7.79646e-15	2.6285e-10	0.312	0.19	5
LITAF	0.67688	8.74649e-15	2.94879e-10	0.472	0.362	5
IL2RG	0.604971	2.37272e-14	7.99937e-10	0.58	0.525	5
SELENOK	0.692934	5.01388e-14	1.69038e-09	0.556	0.501	5
PCED1B-AS1	0.559985	5.98962e-14	2.01934e-09	0.488	0.394	5
DNAJB1	0.317764	7.50373e-14	2.52981e-09	0.556	0.415	5
TMEM50A	0.688624	1.75952e-13	5.93204e-09	0.423	0.327	5
DYNLL1	0.560278	2.00819e-13	6.77041e-09	0.535	0.46	5
CD63	0.673109	2.43919e-13	8.22348e-09	0.434	0.319	5
JPT1	0.509346	1.09549e-12	3.69333e-08	0.366	0.25	5
PLK3	0.533454	1.25246e-12	4.22254e-08	0.27	0.159	5
HSPA8	0.311186	1.61052e-12	5.42971e-08	0.763	0.729	5
AKNA	0.617025	2.58061e-12	8.70027e-08	0.385	0.271	5
FABP5	0.619285	3.22897e-12	1.08861e-07	0.254	0.149	5
SIGIRR	0.431236	7.94754e-12	2.67943e-07	0.272	0.161	5
RGS10	0.468242	1.08994e-11	3.67463e-07	0.284	0.176	5
HMGB2	0.412411	2.98184e-11	1.0053e-06	0.378	0.265	5
ZNF331	0.30863	1.16473e-10	3.92679e-06	0.481	0.349	5
ACAP1	0.472181	1.39942e-10	4.71799e-06	0.545	0.472	5
ELF1	0.474806	1.54186e-10	5.19821e-06	0.523	0.454	5
GMFG	0.441818	3.06213e-10	1.03237e-05	0.521	0.464	5
DDX24	0.584641	3.21515e-10	1.08396e-05	0.523	0.474	5
S100A11	0.452718	5.32259e-10	1.79446e-05	0.406	0.318	5
GNG2	0.523115	7.03721e-10	2.37253e-05	0.31	0.208	5
SERTAD1	0.589858	9.57782e-10	3.22906e-05	0.286	0.195	5
ARID5A	0.501422	1.19304e-09	4.02221e-05	0.338	0.242	5
CDC42SE2	0.50559	1.55005e-09	5.22583e-05	0.38	0.294	5
LCP1	0.402557	1.96312e-09	6.61846e-05	0.493	0.417	5
PBXIP1	0.483424	2.40428e-09	8.1058e-05	0.296	0.202	5
ABRACL	0.441182	2.46661e-09	8.31594e-05	0.319	0.223	5
MYL12B	0.402628	2.98198e-09	0.000100534	0.613	0.611	5
SDCBP	0.626729	3.04247e-09	0.000102574	0.352	0.268	5
PTPN7	0.529927	3.74713e-09	0.000126331	0.322	0.23	5
RALGAPA1	0.513681	4.52076e-09	0.000152413	0.272	0.182	5
NDUFS5	0.50386	1.06622e-08	0.000359465	0.484	0.435	5
LGALS1	0.692281	3.80178e-08	0.00128173	0.432	0.369	5
ARPC2	0.290208	4.13638e-08	0.00139454	0.704	0.734	5
ANXA2	0.506307	4.65929e-08	0.00157083	0.35	0.272	5
RNF19A	0.549694	7.19392e-08	0.00242536	0.31	0.227	5
PRPF38B	0.601813	1.041e-07	0.00350962	0.437	0.379	5
DNAJA1	0.327107	1.21243e-07	0.0040876	0.573	0.518	5
EML4	0.517996	1.35925e-07	0.00458259	0.43	0.366	5
DHX36	0.521826	1.78206e-07	0.00600803	0.364	0.295	5
ARID4B	0.495536	1.88807e-07	0.00636545	0.462	0.408	5
IFIT3	1.08149	5.80396e-130	1.95675e-125	0.409	0.065	6
IFIT1	0.935902	5.42427e-104	1.82874e-99	0.313	0.048	6
MX1	0.990338	2.17238e-95	7.32397e-91	0.711	0.27	6
OAS1	0.801283	6.09441e-94	2.05467e-89	0.542	0.154	6
IFI44L	0.852792	4.10321e-88	1.38336e-83	0.567	0.164	6
ISG15	1.42239	1.17913e-84	3.97531e-80	0.711	0.296	6
DUSP4	0.84852	2.90428e-81	9.79149e-77	0.403	0.094	6
MX2	0.609011	6.45427e-65	2.17599e-60	0.422	0.121	6
STAT1	0.750046	8.50892e-64	2.8687e-59	0.586	0.23	6
LY6E	0.818849	1.39984e-58	4.71944e-54	0.809	0.466	6
UBE2L6	0.633788	5.31992e-58	1.79356e-53	0.64	0.292	6
EPSTI1	0.78712	3.23812e-57	1.0917e-52	0.537	0.212	6
SAMD9L	0.676919	4.50383e-56	1.51842e-51	0.46	0.16	6
ACTB	0.641374	8.34093e-54	2.81206e-49	1	0.948	6
ZBTB32	0.321606	1.11834e-52	3.77037e-48	0.253	0.056	6
PSMB9	0.603998	2.58315e-52	8.70882e-48	0.877	0.572	6
PARP9	0.44593	3.63866e-52	1.22674e-47	0.381	0.117	6
ARPC1B	0.6459	6.917e-52	2.332e-47	0.842	0.576	6
PFN1	0.580354	3.3275e-50	1.12183e-45	0.959	0.842	6
IFITM1	1.02996	2.43717e-49	8.21668e-45	0.673	0.354	6
EIF2AK2	0.589638	4.88354e-48	1.64644e-43	0.512	0.211	6
IFI6	0.84989	3.34506e-47	1.12776e-42	0.529	0.232	6
MS4A1	0.570562	4.25433e-47	1.4343e-42	0.97	0.697	6
RAC2	0.544575	1.23237e-46	4.15483e-42	0.907	0.659	6
HLA-DPA1	0.500376	6.6364e-46	2.2374e-41	0.978	0.825	6
PLEK	0.549397	8.42556e-46	2.84059e-41	0.463	0.183	6
IFI30	0.884191	4.01228e-45	1.3527e-40	0.706	0.433	6
PLSCR1	0.573145	7.88709e-45	2.65905e-40	0.401	0.142	6
XAF1	0.645616	1.13629e-43	3.83088e-39	0.526	0.229	6
IFITM2	0.617152	1.26346e-43	4.25965e-39	0.807	0.482	6
IFI44	0.462653	2.9274e-43	9.86945e-39	0.259	0.068	6
ACTG1	0.680092	4.05913e-42	1.36849e-37	0.924	0.806	6
RAB31	0.388775	5.03583e-42	1.69778e-37	0.362	0.12	6
DRAP1	0.508709	1.06537e-40	3.59178e-36	0.692	0.387	6
MYL12A	0.569488	1.9665e-40	6.62985e-36	0.926	0.703	6
TMSB4X	0.505352	5.39862e-40	1.82009e-35	1	0.971	6
RABGAP1L	0.476273	7.55173e-40	2.54599e-35	0.523	0.235	6
COTL1	0.537955	1.03277e-39	3.48187e-35	0.787	0.532	6
ANXA4	0.322604	1.65493e-39	5.57943e-35	0.305	0.092	6
IRF7	0.643784	2.65299e-39	8.94427e-35	0.602	0.313	6
ACP5	0.572829	3.4117e-39	1.15022e-34	0.531	0.25	6
ARPC2	0.501794	4.66151e-39	1.57158e-34	0.896	0.726	6
COX5A	0.475371	2.32108e-38	7.82528e-34	0.703	0.394	6
TTN	0.484541	6.03672e-38	2.03522e-33	0.343	0.116	6
TWF2	0.346186	7.70304e-38	2.597e-33	0.436	0.172	6
SP110	0.500675	1.24542e-36	4.19881e-32	0.782	0.488	6
CAPG	0.552616	1.32293e-36	4.46012e-32	0.586	0.303	6
HLA-DPB1	0.452617	8.79954e-36	2.96668e-31	0.984	0.805	6
CLIC1	0.457967	5.05993e-35	1.70591e-30	0.886	0.691	6
HLA-DQB1	0.448092	2.64825e-34	8.92832e-30	0.959	0.755	6
ARPC4	0.40364	2.74584e-34	9.25731e-30	0.662	0.364	6
TAP1	0.433787	2.84733e-34	9.59949e-30	0.58	0.301	6
ARPC3	0.377439	3.7754e-34	1.27284e-29	0.932	0.79	6
BST2	0.472027	4.60348e-34	1.55202e-29	0.684	0.397	6
ARPC5	0.460024	7.06416e-34	2.38161e-29	0.659	0.376	6
PSME2	0.510355	8.0356e-34	2.70912e-29	0.736	0.473	6
RFTN1	0.342601	1.93898e-33	6.53706e-29	0.417	0.169	6
HLA-DRA	0.370647	3.81912e-33	1.28758e-28	0.995	0.854	6
TPM3	0.41792	9.82195e-33	3.31137e-28	0.798	0.548	6
OAS2	0.368692	1.2987e-32	4.37843e-28	0.281	0.095	6
LAP3	0.417384	2.00748e-32	6.76802e-28	0.395	0.169	6
CTSH	0.493302	2.52244e-32	8.50416e-28	0.714	0.471	6
NMI	0.368479	3.65691e-32	1.23289e-27	0.311	0.109	6
CORO1A	0.429625	1.26994e-31	4.28146e-27	0.91	0.731	6
TNFRSF13B	0.451476	3.67461e-31	1.23886e-26	0.523	0.263	6
CFL1	0.384163	1.0901e-30	3.67517e-26	0.954	0.827	6
PKM	0.492419	1.11756e-30	3.76775e-26	0.689	0.442	6
HLA-DRB1	0.493216	1.14334e-30	3.85465e-26	0.946	0.765	6
PTPN6	0.443354	1.53431e-30	5.17276e-26	0.706	0.435	6
IFI35	0.459904	1.54116e-30	5.19586e-26	0.42	0.193	6
HLA-DRB5	0.516888	1.82092e-30	6.13906e-26	0.894	0.688	6
PIKFYVE	0.357032	1.92094e-30	6.47627e-26	0.422	0.181	6
GAPDH	0.407707	2.04548e-30	6.89613e-26	0.921	0.825	6
HSH2D	0.489362	5.28037e-30	1.78022e-25	0.561	0.316	6
IGFLR1	0.383228	8.40014e-30	2.83202e-25	0.537	0.284	6
PSMB8	0.40424	8.7003e-30	2.93322e-25	0.706	0.441	6
CCDC50	0.429941	1.02583e-29	3.4585e-25	0.61	0.344	6
HLA-A	0.305666	2.53499e-29	8.54648e-25	0.989	0.945	6
GBP4	0.430324	3.55177e-29	1.19744e-24	0.264	0.09	6
CAPZB	0.418511	6.88744e-29	2.32203e-24	0.684	0.442	6
HLA-DQA1	0.5792	1.03754e-28	3.49798e-24	0.883	0.637	6
TRIM22	0.500684	1.12751e-28	3.8013e-24	0.608	0.335	6
TYMP	0.474931	1.19184e-28	4.01817e-24	0.572	0.316	6
SPIB	0.457969	1.84083e-28	6.20618e-24	0.599	0.323	6
PTPN1	0.496394	3.10557e-28	1.04701e-23	0.537	0.302	6
PARP14	0.357317	5.23495e-28	1.76491e-23	0.55	0.285	6
PKIG	0.330487	9.8703e-28	3.32767e-23	0.55	0.275	6
SEPTIN7	0.406587	1.30474e-27	4.3988e-23	0.793	0.552	6
CD53	0.455792	1.31673e-27	4.43924e-23	0.831	0.607	6
PSME1	0.360587	1.55626e-27	5.24679e-23	0.85	0.656	6
PLEKHO1	0.434489	1.74759e-27	5.89184e-23	0.523	0.278	6
SH3BGRL3	0.372208	3.91102e-27	1.31856e-22	0.883	0.741	6
CD74	0.366514	4.15412e-27	1.40052e-22	0.995	0.952	6
TPI1	0.415249	4.52894e-27	1.52689e-22	0.728	0.504	6
LGALS9	0.341013	5.60034e-27	1.8881e-22	0.371	0.156	6
PSMA5	0.337126	7.88555e-27	2.65854e-22	0.482	0.241	6
BCL2A1	0.460957	1.00476e-26	3.38745e-22	0.531	0.279	6
CD86	0.332693	1.03469e-26	3.48836e-22	0.297	0.113	6
HOPX	0.509735	1.17801e-26	3.97155e-22	0.313	0.123	6
SUB1	0.440393	1.49471e-26	5.03927e-22	0.866	0.635	6
RNF213	0.487001	1.66776e-26	5.62268e-22	0.553	0.31	6
DOCK10	0.268922	3.37069e-26	1.13639e-21	0.357	0.15	6
CSK	0.381589	3.72212e-26	1.25487e-21	0.649	0.391	6
LCP1	0.378662	4.58116e-26	1.54449e-21	0.67	0.41	6
VAMP5	0.305097	4.65383e-26	1.56899e-21	0.341	0.144	6
MT2A	0.377106	8.17425e-26	2.75587e-21	0.322	0.134	6
S100A11	0.254037	1.1451e-25	3.8606e-21	0.561	0.313	6
ATP6V0E1	0.351907	2.17479e-25	7.33208e-21	0.801	0.595	6
HIGD2A	0.370933	2.97404e-25	1.00267e-20	0.744	0.517	6
CD164	0.375626	3.90741e-25	1.31734e-20	0.635	0.393	6
LSP1	0.433163	4.55686e-25	1.5363e-20	0.798	0.623	6
CD48	0.364298	6.38526e-25	2.15273e-20	0.828	0.574	6
IFI16	0.412785	6.82416e-25	2.3007e-20	0.638	0.375	6
MRPL44	0.320226	6.94941e-25	2.34292e-20	0.311	0.124	6
ZEB2	0.408871	8.51936e-25	2.87222e-20	0.354	0.155	6
TAP2	0.35883	1.16833e-24	3.9389e-20	0.477	0.254	6
LIMD2	0.338993	1.23786e-24	4.17332e-20	0.875	0.665	6
PML	0.302405	1.24044e-24	4.18201e-20	0.324	0.136	6
MOB1A	0.357835	2.00173e-24	6.74863e-20	0.649	0.404	6
TMSB10	0.313212	2.01071e-24	6.77891e-20	0.986	0.942	6
ILK	0.279059	2.4161e-24	8.14564e-20	0.308	0.127	6
PIK3AP1	0.272306	2.76736e-24	9.32987e-20	0.409	0.187	6
PPIA	0.351354	4.8008e-24	1.61854e-19	0.913	0.781	6
HLA-E	0.29999	7.76111e-24	2.61658e-19	0.973	0.887	6
CD19	0.47927	8.51801e-24	2.87176e-19	0.689	0.458	6
IRF9	0.363812	9.76622e-24	3.29258e-19	0.594	0.354	6
SCIMP	0.309	1.26474e-23	4.26395e-19	0.417	0.191	6
MIR155HG	0.428312	1.29058e-23	4.35105e-19	0.251	0.096	6
PYCARD	0.361263	1.74328e-23	5.87729e-19	0.455	0.239	6
CTSC	0.254423	1.84423e-23	6.21763e-19	0.354	0.161	6
CAPNS1	0.297559	2.46408e-23	8.30741e-19	0.45	0.232	6
HLA-DMA	0.319145	2.82044e-23	9.50883e-19	0.883	0.683	6
TRAPPC1	0.338966	3.99982e-23	1.3485e-18	0.635	0.409	6
HCST	0.256163	6.17099e-23	2.08049e-18	0.417	0.199	6
ATP5MC2	0.326944	6.41966e-23	2.16432e-18	0.921	0.761	6
SERBP1	0.346114	8.32791e-23	2.80767e-18	0.708	0.481	6
EIF6	0.265368	9.44813e-23	3.18534e-18	0.463	0.238	6
TLN1	0.400863	9.94779e-23	3.3538e-18	0.515	0.297	6
GDI2	0.439471	1.2982e-22	4.37674e-18	0.673	0.473	6
PRR13	0.35602	1.33093e-22	4.48709e-18	0.752	0.518	6
LRMP	0.302267	1.55789e-22	5.25227e-18	0.428	0.212	6
CLECL1	0.275779	1.8096e-22	6.10088e-18	0.362	0.161	6
GRN	0.430484	1.89512e-22	6.38921e-18	0.531	0.331	6
IFITM3	0.368987	3.45834e-22	1.16594e-17	0.422	0.214	6
SELENOH	0.330964	3.95844e-22	1.33455e-17	0.76	0.557	6
BRK1	0.320107	5.03303e-22	1.69683e-17	0.711	0.485	6
PSMB10	0.306644	5.73575e-22	1.93375e-17	0.64	0.401	6
PARP12	0.294991	6.14619e-22	2.07213e-17	0.281	0.115	6
NAPSA	0.420424	8.08321e-22	2.72517e-17	0.45	0.238	6
WARS	0.311179	8.65311e-22	2.91731e-17	0.253	0.102	6
PSMA2	0.367693	1.14162e-21	3.84887e-17	0.627	0.384	6
PPP4C	0.255938	1.74568e-21	5.88539e-17	0.531	0.299	6
ADAR	0.31614	2.25764e-21	7.61141e-17	0.594	0.369	6
POU2F2	0.383862	2.45864e-21	8.28907e-17	0.692	0.456	6
ID3	0.497083	2.55435e-21	8.61175e-17	0.417	0.214	6
CD82	0.394308	3.44581e-21	1.16172e-16	0.586	0.351	6
C1QBP	0.347332	4.52125e-21	1.5243e-16	0.575	0.35	6
RBCK1	0.341383	4.91223e-21	1.65611e-16	0.463	0.254	6
ISG20	0.61444	5.58069e-21	1.88148e-16	0.768	0.591	6
GSTK1	0.310607	5.63987e-21	1.90143e-16	0.676	0.46	6
LAT2	0.324499	5.76246e-21	1.94276e-16	0.561	0.324	6
CYB561A3	0.255529	5.91861e-21	1.9954e-16	0.499	0.261	6
ACTR3	0.382872	7.86472e-21	2.65151e-16	0.695	0.494	6
FCRL5	0.587691	8.01616e-21	2.70257e-16	0.33	0.163	6
MEF2C	0.341044	8.46665e-21	2.85445e-16	0.752	0.518	6
RNASET2	0.318273	8.99355e-21	3.03208e-16	0.823	0.596	6
SAMD9	0.25276	1.14694e-20	3.86678e-16	0.316	0.139	6
SRI	0.280538	1.21373e-20	4.09197e-16	0.488	0.267	6
UBE2N	0.278809	1.35985e-20	4.58461e-16	0.594	0.357	6
ITGB2	0.318211	1.38505e-20	4.66954e-16	0.507	0.286	6
CALM2	0.269962	1.44629e-20	4.87601e-16	0.877	0.694	6
PSMA7	0.316782	2.81746e-20	9.49878e-16	0.73	0.52	6
VOPP1	0.372315	3.2744e-20	1.10393e-15	0.545	0.344	6
DYNLT1	0.282547	3.4794e-20	1.17304e-15	0.332	0.155	6
CHI3L2	0.492692	3.93698e-20	1.32731e-15	0.316	0.144	6
ATP5F1E	0.254948	5.50242e-20	1.85508e-15	0.929	0.831	6
AC004687.1	0.28114	6.18455e-20	2.08506e-15	0.428	0.218	6
VDAC1	0.27085	8.3446e-20	2.8133e-15	0.474	0.268	6
HCLS1	0.311873	1.5465e-19	5.21389e-15	0.692	0.477	6
ENTPD1	0.262072	1.95525e-19	6.59192e-15	0.327	0.154	6
PARP15	0.254781	2.16434e-19	7.29686e-15	0.428	0.214	6
DBI	0.343873	2.50302e-19	8.43869e-15	0.627	0.413	6
ENO1	0.366455	2.56044e-19	8.63228e-15	0.668	0.467	6
GNAI2	0.36163	2.58958e-19	8.73051e-15	0.613	0.417	6
CIB1	0.399195	3.85518e-19	1.29974e-14	0.67	0.46	6
YBX1	0.374868	4.50715e-19	1.51954e-14	0.905	0.783	6
LITAF	0.30715	4.91864e-19	1.65827e-14	0.58	0.358	6
ARF5	0.264417	5.7149e-19	1.92672e-14	0.48	0.268	6
GNG5	0.307396	6.35695e-19	2.14318e-14	0.616	0.406	6
WDR1	0.261674	6.70729e-19	2.2613e-14	0.501	0.286	6
ARPC5L	0.331383	7.30963e-19	2.46437e-14	0.501	0.303	6
MYL6	0.296682	7.76286e-19	2.61717e-14	0.907	0.798	6
VASP	0.250045	7.83471e-19	2.64139e-14	0.569	0.335	6
SYNGR2	0.412103	8.11205e-19	2.7349e-14	0.728	0.562	6
ATP5MF	0.292757	8.66927e-19	2.92276e-14	0.619	0.407	6
PSMB3	0.262629	8.82907e-19	2.97663e-14	0.608	0.39	6
SP100	0.300273	1.02481e-18	3.45504e-14	0.73	0.509	6
HLA-C	0.261485	1.13579e-18	3.82919e-14	0.989	0.943	6
SMARCC1	0.278058	1.39282e-18	4.69574e-14	0.433	0.234	6
PLD4	0.346235	1.60686e-18	5.41736e-14	0.351	0.17	6
PARP10	0.264544	1.61928e-18	5.45925e-14	0.305	0.143	6
SERPINB1	0.276528	1.75549e-18	5.91846e-14	0.447	0.249	6
CCDC85B	0.318506	1.78613e-18	6.02177e-14	0.553	0.348	6
ARHGAP25	0.291447	2.02866e-18	6.83942e-14	0.425	0.231	6
NOP10	0.287199	2.08236e-18	7.02048e-14	0.586	0.371	6
LPXN	0.260896	2.16003e-18	7.28232e-14	0.417	0.222	6
SEPTIN6	0.34089	2.38938e-18	8.05555e-14	0.665	0.456	6
ARHGDIB	0.275314	2.47496e-18	8.34407e-14	0.937	0.761	6
CD70	0.332684	2.55606e-18	8.61749e-14	0.253	0.108	6
ATP5MC3	0.285119	2.68768e-18	9.06125e-14	0.657	0.453	6
RTCB	0.262955	3.10487e-18	1.04677e-13	0.349	0.172	6
ARL6IP5	0.251447	4.26444e-18	1.43771e-13	0.67	0.451	6
PGAM1	0.297825	5.3758e-18	1.8124e-13	0.485	0.288	6
SS18L2	0.264949	5.5509e-18	1.87143e-13	0.48	0.275	6
MYL12B	0.261847	8.06565e-18	2.71925e-13	0.815	0.603	6
FGD2	0.265606	8.28088e-18	2.79182e-13	0.368	0.186	6
EAF2	0.26774	8.66595e-18	2.92164e-13	0.537	0.322	6
RAN	0.313832	1.2428e-17	4.18998e-13	0.774	0.597	6
ATP5F1B	0.278057	1.54109e-17	5.19563e-13	0.695	0.508	6
BASP1	0.383677	2.04849e-17	6.90626e-13	0.591	0.396	6
IL2RG	0.323614	2.21107e-17	7.4544e-13	0.703	0.521	6
NUTF2	0.271641	2.22772e-17	7.51053e-13	0.387	0.21	6
FLNA	0.394588	2.9372e-17	9.90247e-13	0.422	0.238	6
ITGB7	0.28962	3.32729e-17	1.12176e-12	0.376	0.203	6
WAS	0.271285	4.55e-17	1.53399e-12	0.526	0.321	6
PPP1R16B	0.252495	5.58931e-17	1.88438e-12	0.368	0.184	6
FAM107B	0.373863	5.68973e-17	1.91823e-12	0.561	0.367	6
BANK1	0.284841	8.70811e-17	2.93585e-12	0.804	0.55	6
CASP1	0.285537	1.14193e-16	3.8499e-12	0.253	0.113	6
SYTL1	0.355495	1.2589e-16	4.24427e-12	0.499	0.314	6
CXXC1	0.291562	1.66769e-16	5.62244e-12	0.286	0.14	6
CD52	0.314896	1.84617e-16	6.22418e-12	0.937	0.786	6
LYN	0.262627	1.87793e-16	6.33124e-12	0.61	0.381	6
TNFAIP8	0.31032	1.88567e-16	6.35733e-12	0.599	0.373	6
PRDX1	0.309593	2.06855e-16	6.97392e-12	0.681	0.501	6
SMC6	0.251197	3.4673e-16	1.16897e-11	0.332	0.167	6
NT5C3A	0.446871	3.56259e-16	1.20109e-11	0.433	0.258	6
GRB2	0.306145	4.00765e-16	1.35114e-11	0.659	0.477	6
CHMP4A	0.250114	4.85526e-16	1.6369e-11	0.488	0.291	6
ATP5F1C	0.250533	5.7883e-16	1.95147e-11	0.515	0.326	6
DBNL	0.252674	6.75454e-16	2.27723e-11	0.553	0.345	6
CD99	0.293908	8.67097e-16	2.92333e-11	0.629	0.444	6
UNC93B1	0.250366	1.08191e-15	3.64756e-11	0.403	0.227	6
PPM1K	0.312234	1.16362e-15	3.92304e-11	0.569	0.365	6
NDUFB2	0.278753	1.37639e-15	4.64036e-11	0.624	0.443	6
CAP1	0.253891	2.05413e-15	6.92531e-11	0.649	0.46	6
CDC42	0.253655	2.30357e-15	7.76626e-11	0.744	0.547	6
ALDOA	0.265773	4.6388e-15	1.56393e-10	0.452	0.271	6
COX6C	0.251624	7.32314e-15	2.46892e-10	0.757	0.582	6
TCIRG1	0.276723	7.48198e-15	2.52248e-10	0.411	0.247	6
CRIP1	0.415736	8.09616e-15	2.72954e-10	0.736	0.603	6
LAPTM5	0.298956	9.54622e-15	3.21841e-10	0.946	0.767	6
SP140	0.312167	1.23534e-14	4.16483e-10	0.499	0.322	6
FDFT1	0.253787	1.25315e-14	4.22488e-10	0.384	0.217	6
RANBP1	0.28526	1.28832e-14	4.34344e-10	0.455	0.282	6
CPNE5	0.297097	1.51732e-14	5.11549e-10	0.371	0.213	6
LBH	0.262643	2.26574e-14	7.63871e-10	0.512	0.311	6
CHCHD10	0.302215	2.37677e-14	8.01305e-10	0.698	0.531	6
YWHAB	0.251873	2.43651e-14	8.21445e-10	0.76	0.578	6
TOMM6	0.277758	2.50582e-14	8.44812e-10	0.692	0.507	6
NME2	0.286081	3.72626e-14	1.25627e-09	0.815	0.672	6
LDLRAD4	0.300682	4.69132e-14	1.58163e-09	0.351	0.191	6
RHOA	0.275936	4.80853e-14	1.62115e-09	0.787	0.643	6
CTSZ	0.319001	4.9904e-14	1.68246e-09	0.545	0.381	6
CMTM6	0.266098	5.3621e-14	1.80778e-09	0.605	0.402	6
UQCR11	0.256508	6.30457e-14	2.12552e-09	0.719	0.553	6
FCRLA	0.298694	6.5782e-14	2.21778e-09	0.575	0.393	6
RAB11FIP1	0.297294	6.77108e-14	2.2828e-09	0.447	0.274	6
AIM2	0.250937	7.26618e-14	2.44972e-09	0.332	0.179	6
SND1	0.25636	9.47243e-14	3.19353e-09	0.425	0.259	6
SHFL	0.267995	1.52441e-13	5.13938e-09	0.425	0.255	6
VIM	0.366902	2.31454e-13	7.80324e-09	0.777	0.653	6
HLA-DQA2	0.446989	2.80679e-13	9.46282e-09	0.578	0.413	6
SHISA5	0.251754	3.60269e-13	1.21461e-08	0.436	0.269	6
POMP	0.264809	4.85058e-13	1.63533e-08	0.594	0.429	6
FCMR	0.2713	5.00751e-13	1.68823e-08	0.689	0.481	6
PHF11	0.262979	9.66507e-13	3.25848e-08	0.332	0.184	6
RESF1	0.300539	1.13483e-12	3.82595e-08	0.482	0.311	6
EVI2A	0.262554	1.23079e-12	4.14947e-08	0.278	0.145	6
EIF5A	0.306495	1.38555e-12	4.67123e-08	0.624	0.457	6
PLAC8	0.671787	2.94301e-12	9.92205e-08	0.49	0.341	6
SYK	0.261214	3.42672e-12	1.15528e-07	0.433	0.273	6
PLCG2	0.354284	5.77485e-12	1.94693e-07	0.501	0.333	6
EIF5B	0.255599	5.98003e-12	2.01611e-07	0.447	0.286	6
DUSP2	0.352979	1.19592e-11	4.03193e-07	0.548	0.381	6
SNRPB	0.25477	1.60564e-11	5.41326e-07	0.649	0.475	6
BAX	0.262508	1.75695e-11	5.92339e-07	0.526	0.364	6
DUSP5	0.311699	2.07105e-11	6.98233e-07	0.33	0.197	6
MAP3K8	0.250335	5.07721e-11	1.71173e-06	0.458	0.307	6
CD40	0.256462	5.76392e-11	1.94325e-06	0.548	0.377	6
ITGB1	0.343699	7.47068e-11	2.51867e-06	0.406	0.264	6
SMIM14	0.251092	4.17787e-10	1.40853e-05	0.61	0.457	6
RGCC	0.363714	7.39194e-10	2.49212e-05	0.324	0.204	6
SELL	0.254789	1.13939e-09	3.84135e-05	0.67	0.497	6
MCL1	0.257656	1.67414e-08	0.00056442	0.619	0.498	6
NME1	0.28254	1.31399e-07	0.00442998	0.286	0.188	6
RGS1	0.433445	1.93927e-07	0.00653806	0.466	0.34	6
MZB1	1.29756	1.44356e-178	4.86682e-174	0.874	0.252	7
FKBP11	1.2261	6.26155e-176	2.11102e-171	0.807	0.207	7
SSR4	1.49447	4.93741e-158	1.6646e-153	0.969	0.621	7
PRDX4	1.14564	2.53836e-139	8.55782e-135	0.712	0.202	7
IGHG1	2.00424	1.09961e-133	3.70723e-129	0.83	0.353	7
XBP1	1.15159	9.57071e-133	3.22667e-128	0.799	0.263	7
DERL3	1.15395	4.66453e-132	1.5726e-127	0.723	0.21	7
IGHG4	2.17442	1.33006e-128	4.48416e-124	0.846	0.335	7
IGHG3	1.98796	6.1289e-109	2.0663e-104	0.802	0.347	7
ITM2C	0.788103	1.49462e-68	5.03896e-64	0.615	0.237	7
SEC11C	0.832878	3.23965e-63	1.09222e-58	0.668	0.304	7
JCHAIN	1.44134	1.01002e-60	3.40517e-56	0.673	0.333	7
SPAG4	0.67193	1.33897e-57	4.5142e-53	0.346	0.097	7
JSRP1	0.708556	2.71498e-56	9.1533e-52	0.321	0.084	7
SDC1	0.624095	4.65356e-52	1.5689e-47	0.324	0.091	7
NUCB2	0.63733	7.51077e-51	2.53218e-46	0.419	0.145	7
IGKC	2.10773	2.35982e-48	7.95589e-44	0.793	0.698	7
SDF2L1	0.51492	3.40017e-31	1.14633e-26	0.447	0.204	7
IGLC1	2.1973	3.38959e-30	1.14277e-25	0.5	0.247	7
SSR3	0.558579	3.10869e-29	1.04806e-24	0.556	0.318	7
CD63	0.556516	2.65898e-28	8.96449e-24	0.559	0.315	7
GAS6	0.372297	2.31451e-24	7.80313e-20	0.251	0.093	7
SPCS3	0.535125	5.66777e-24	1.91083e-19	0.494	0.283	7
MANF	0.512783	3.48022e-21	1.17332e-16	0.411	0.218	7
MYDGF	0.502246	4.58996e-21	1.54746e-16	0.489	0.288	7
TMEM59	0.529469	2.61973e-20	8.83217e-16	0.645	0.481	7
IGLC2	2.13387	6.68262e-20	2.25298e-15	0.645	0.466	7
HSP90B1	0.369113	1.33352e-19	4.49583e-15	0.687	0.518	7
TXNDC15	0.411749	4.84255e-18	1.63262e-13	0.33	0.169	7
CD59	0.374148	7.99643e-18	2.69592e-13	0.346	0.18	7
SELENOM	0.437572	6.08831e-17	2.05261e-12	0.439	0.259	7
IGLC3	1.75145	7.83338e-17	2.64095e-12	0.536	0.357	7
IGHG2	2.27761	1.69739e-16	5.72258e-12	0.372	0.222	7
CD38	0.369662	5.19892e-16	1.75276e-11	0.31	0.156	7
SPCS2	0.431906	6.54597e-16	2.20691e-11	0.645	0.484	7
TNFRSF17	0.318678	7.61728e-16	2.56809e-11	0.288	0.14	7
PSAP	0.456787	9.00698e-16	3.03661e-11	0.64	0.501	7
ERLEC1	0.462525	2.45099e-15	8.26328e-11	0.38	0.222	7
SELENOS	0.407844	4.01273e-15	1.35285e-10	0.425	0.256	7
TXNDC5	0.435342	1.93402e-14	6.52035e-10	0.352	0.205	7
IFI6	0.589593	1.06806e-13	3.60087e-09	0.388	0.238	7
CRELD2	0.297936	1.09422e-09	3.68907e-05	0.313	0.195	7
DNAJB9	0.349308	4.65541e-09	0.000156952	0.36	0.239	7
RPN2	0.312499	5.44225e-09	0.00018348	0.453	0.337	7
PDIA6	0.283334	1.56987e-07	0.00529265	0.475	0.366	7
FXYD3	1.15447	6.96081e-192	2.34677e-187	0.27	0.015	8
WFDC2	1.35387	5.09032e-128	1.71615e-123	0.251	0.021	8
CST3	1.57849	6.03599e-85	2.03497e-80	0.434	0.1	8
LYZ	1.75649	5.74899e-78	1.93821e-73	0.257	0.038	8
KRT8	0.95304	5.36027e-77	1.80716e-72	0.296	0.051	8
ANXA1	1.09145	6.76421e-70	2.28049e-65	0.36	0.079	8
KRT18	1.0316	3.52722e-67	1.18917e-62	0.315	0.066	8
LGALS3BP	0.631795	5.08297e-66	1.71367e-61	0.254	0.043	8
PTMS	0.67192	6.40755e-62	2.16024e-57	0.299	0.061	8
TYROBP	1.27378	1.113e-49	3.75236e-45	0.264	0.06	8
S100A6	1.43625	7.96259e-45	2.68451e-40	0.743	0.551	8
KRT19	1.27103	1.4202e-44	4.78806e-40	0.267	0.066	8
CD9	0.769319	8.58112e-41	2.89304e-36	0.264	0.067	8
TXN	1.20999	8.18788e-34	2.76046e-29	0.543	0.303	8
GAPDH	0.969222	1.51914e-33	5.12162e-29	0.871	0.827	8
RHOC	0.530389	1.52212e-32	5.13169e-28	0.257	0.074	8
HSPB1	1.05249	9.12203e-29	3.0754e-24	0.521	0.299	8
GSTP1	1.01106	2.449e-26	8.25654e-22	0.637	0.489	8
KLF4	0.549109	1.67098e-25	5.63353e-21	0.264	0.09	8
S100A11	1.60135	2.31088e-25	7.7909e-21	0.502	0.316	8
RPS24	0.380251	2.60385e-25	8.77862e-21	0.916	0.946	8
NME2	0.909957	1.65667e-17	5.58529e-13	0.672	0.678	8
LGALS3	0.830421	2.71863e-16	9.16557e-12	0.293	0.147	8
FTH1	0.735526	1.08409e-14	3.65488e-10	0.958	0.968	8
VAMP8	0.71064	1.71195e-14	5.77168e-10	0.521	0.385	8
IFITM3	0.916362	6.60962e-14	2.22837e-09	0.367	0.217	8
TIMP1	0.904384	1.34092e-13	4.52078e-09	0.254	0.121	8
CYB5A	0.597332	8.68945e-13	2.92956e-08	0.315	0.175	8
RPL27	0.401754	1.1584e-12	3.90543e-08	0.836	0.913	8
PPA1	0.685069	3.60696e-12	1.21605e-07	0.399	0.264	8
MT-ND2	0.576726	3.92705e-12	1.32396e-07	0.842	0.925	8
RPS16	0.299052	4.63482e-12	1.56258e-07	0.91	0.949	8
MT-ND4	0.511771	4.73455e-12	1.5962e-07	0.855	0.934	8
ATP5F1E	0.439649	1.38078e-11	4.65517e-07	0.82	0.835	8
RPL36A	0.288404	6.01227e-11	2.02698e-06	0.855	0.912	8
RPL37A	0.412042	8.37367e-11	2.8231e-06	0.865	0.92	8
TMSB10	0.497833	8.80487e-11	2.96848e-06	0.926	0.944	8
MRPL12	0.374456	1.45383e-10	4.90145e-06	0.26	0.143	8
CD63	0.57716	1.83458e-10	6.18509e-06	0.45	0.32	8
RPS17	0.442205	1.84801e-10	6.23039e-06	0.823	0.848	8
TPI1	0.618626	2.02241e-10	6.81835e-06	0.569	0.511	8
MT-ND1	0.550845	2.83305e-10	9.55135e-06	0.839	0.915	8
RPLP0	0.384199	3.72124e-10	1.25458e-05	0.881	0.947	8
GAS5	0.719746	1.63977e-09	5.52833e-05	0.701	0.719	8
RPL6	0.352695	1.64161e-09	5.53454e-05	0.878	0.945	8
LDHB	0.78669	2.36047e-09	7.9581e-05	0.537	0.496	8
ANXA2	0.650575	3.17381e-09	0.000107002	0.392	0.271	8
YBX3	0.368715	3.93776e-09	0.000132758	0.315	0.185	8
RPL35	0.265107	4.9297e-09	0.0001662	0.897	0.942	8
SNHG29	0.791434	4.9833e-09	0.000168007	0.714	0.734	8
RPL7	0.38206	5.49642e-09	0.000185306	0.849	0.922	8
ZFAS1	0.515989	5.97059e-09	0.000201292	0.695	0.701	8
RPS7	0.279876	6.03906e-09	0.000203601	0.9	0.954	8
FTL	1.30633	7.48642e-09	0.000252397	0.961	0.968	8
UQCRH	0.466248	1.07524e-08	0.000362505	0.659	0.669	8
RPS2	0.414199	1.63613e-08	0.000551604	0.939	0.974	8
NACA	0.355547	1.63991e-08	0.000552878	0.814	0.913	8
RPL27A	0.381504	2.36327e-08	0.000796752	0.852	0.916	8
RPL12	0.273511	3.15036e-08	0.00106211	0.932	0.955	8
MT-CO3	0.413986	3.26037e-08	0.0010992	0.859	0.951	8
CD59	0.354146	4.70855e-08	0.00158744	0.293	0.182	8
RPL23	0.531159	5.72126e-08	0.00192886	0.772	0.84	8
TIMM13	0.368248	6.14312e-08	0.00207109	0.293	0.182	8
ATP5MPL	0.400146	6.62079e-08	0.00223213	0.498	0.409	8
RPS18	0.42488	1.06852e-07	0.00360242	0.965	0.974	8
CLTA	0.522764	1.1311e-07	0.00381338	0.383	0.29	8
NDUFA4	0.4241	1.94743e-07	0.00656556	0.617	0.624	8
NPC2	0.71536	1.95781e-07	0.00660055	0.524	0.427	8
RBP1	2.36075	0	0	0.406	0.007	9
ASPM	2.06851	0	0	0.384	0.012	9
CKB	1.76976	0	0	0.513	0.026	9
MAP1B	1.72357	0	0	0.46	0.009	9
NFIB	1.69564	0	0	0.491	0.005	9
TPX2	1.58887	0	0	0.388	0.013	9
BEX1	1.50012	0	0	0.442	0.005	9
ECT2	1.49645	0	0	0.371	0.011	9
AVP	1.4784	0	0	0.321	0.002	9
PCP4	1.47476	0	0	0.357	0.002	9
ID4	1.3352	0	0	0.424	0.004	9
ENAH	1.30999	0	0	0.464	0.013	9
CPE	1.3082	0	0	0.464	0.005	9
SOX2	1.16541	0	0	0.321	0.004	9
TUBB2B	1.13978	0	0	0.429	0.006	9
TUBB3	1.12745	0	0	0.429	0.015	9
NEK2	1.09251	0	0	0.348	0.006	9
INSM1	1.08241	0	0	0.402	0.003	9
DEPDC1	1.08169	0	0	0.335	0.006	9
GTSE1	1.01214	0	0	0.348	0.008	9
ELAVL3	0.963916	0	0	0.397	0.002	9
UCHL1	0.951602	0	0	0.415	0.013	9
SMARCA1	0.950556	0	0	0.348	0.004	9
NRXN1	0.944009	0	0	0.375	0.002	9
RTN1	0.902529	0	0	0.397	0.002	9
KIF1A	0.894911	0	0	0.388	0.003	9
PTN	0.888716	0	0	0.312	0.005	9
SOX11	0.868632	0	0	0.353	0.002	9
KIF4A	0.863431	0	0	0.326	0.006	9
GNG4	0.853734	0	0	0.384	0.003	9
NMU	0.825007	0	0	0.299	0.004	9
KIF14	0.809931	0	0	0.312	0.006	9
DLGAP5	0.768012	0	0	0.317	0.007	9
FARP1	0.755009	0	0	0.366	0.01	9
ASCL1	0.74973	0	0	0.272	0.002	9
SOX9	0.747673	0	0	0.29	0.005	9
TAGLN3	0.738513	0	0	0.268	0.001	9
EEF1A2	0.738444	0	0	0.29	0.006	9
ZIC2	0.728849	0	0	0.353	0.002	9
MEX3A	0.717612	0	0	0.362	0.004	9
CDC42BPA	0.698274	0	0	0.353	0.003	9
NKX2-1	0.682801	0	0	0.353	0.006	9
IGSF9	0.682118	0	0	0.33	0.003	9
TMSB15A	0.665607	0	0	0.326	0.002	9
CXADR	0.649826	0	0	0.357	0.006	9
TEAD1	0.647885	0	0	0.357	0.003	9
TCEAL2	0.630313	0	0	0.299	0.002	9
DCX	0.626107	0	0	0.295	0.001	9
CRMP1	0.624772	0	0	0.326	0.002	9
KALRN	0.623723	0	0	0.277	0.002	9
CTXN1	0.616458	0	0	0.344	0.003	9
SAPCD2	0.614531	0	0	0.304	0.006	9
SFTA3	0.602762	0	0	0.304	0.006	9
SCG3	0.596891	0	0	0.33	0.001	9
HOXB5	0.58773	0	0	0.263	0.003	9
TLE2	0.585389	0	0	0.317	0.004	9
SEZ6L2	0.55687	0	0	0.29	0.003	9
CCNA1	0.54939	0	0	0.259	0.002	9
NUAK1	0.536434	0	0	0.263	0.002	9
GAS2L3	0.533404	0	0	0.286	0.003	9
HDGFL3	0.530066	0	0	0.321	0.006	9
BARX1	0.528908	0	0	0.272	0.002	9
PLEKHA5	0.519664	0	0	0.29	0.005	9
FXYD6	0.495967	0	0	0.326	0.002	9
NRCAM	0.489773	0	0	0.281	0.003	9
PBX1	0.487096	0	0	0.281	0.004	9
LHX2	0.483244	0	0	0.272	0.001	9
CDH2	0.473704	0	0	0.259	0.001	9
HOXB8	0.446543	0	0	0.259	0.003	9
ATCAY	0.436528	0	0	0.254	0.001	9
CMBL	0.555531	1.63962e-303	5.5278e-299	0.29	0.006	9
CRNDE	0.844826	4.06944e-301	1.37197e-296	0.375	0.013	9
CIT	0.485102	1.29188e-297	4.35543e-293	0.295	0.007	9
CKAP2L	0.566104	1.36781e-297	4.61144e-293	0.281	0.006	9
FBLN1	0.601131	3.61614e-295	1.21915e-290	0.344	0.01	9
MKI67	1.60771	2.15486e-293	7.26489e-289	0.384	0.014	9
FNBP1L	0.970647	1.29942e-291	4.38085e-287	0.438	0.02	9
MEST	0.98165	3.12329e-289	1.05299e-284	0.411	0.017	9
DSP	0.891617	5.20622e-289	1.75522e-284	0.397	0.016	9
TOP2A	2.27642	5.14354e-287	1.73409e-282	0.393	0.016	9
CENPF	3.20269	7.0604e-287	2.38034e-282	0.433	0.02	9
BUB1B	0.66717	9.92688e-287	3.34675e-282	0.295	0.007	9
C21orf58	0.605493	4.06239e-283	1.36959e-278	0.317	0.009	9
PBK	0.492246	4.55368e-283	1.53523e-278	0.277	0.006	9
CENPA	0.766235	4.39427e-282	1.48148e-277	0.312	0.009	9
CCNB2	1.54574	5.7735e-282	1.94648e-277	0.353	0.012	9
NUF2	1.28424	1.16261e-281	3.91963e-277	0.353	0.012	9
AKAP12	0.560237	1.77526e-279	5.98512e-275	0.254	0.005	9
PIK3R3	0.695546	3.4727e-279	1.17079e-274	0.344	0.012	9
CLDN3	1.28066	2.6285e-271	8.86174e-267	0.384	0.016	9
HES6	1.4122	1.02817e-269	3.46639e-265	0.442	0.023	9
KIF2C	0.648398	2.15996e-262	7.28209e-258	0.29	0.008	9
CDCA8	0.743895	3.79628e-262	1.27988e-257	0.326	0.011	9
CDKN1C	0.996567	2.5604e-259	8.63212e-255	0.371	0.016	9
KIF23	0.649406	3.87035e-258	1.30485e-253	0.29	0.008	9
PLK1	0.615243	1.09181e-254	3.68094e-250	0.286	0.008	9
CENPE	0.985022	2.91342e-249	9.8223e-245	0.335	0.013	9
MAP2	0.527816	1.18679e-248	4.00115e-244	0.281	0.008	9
BIRC5	1.16956	2.73254e-245	9.2125e-241	0.344	0.014	9
EPCAM	1.1545	1.53678e-244	5.1811e-240	0.415	0.023	9
NPDC1	0.54994	2.22712e-244	7.5085e-240	0.286	0.009	9
CEP55	0.737543	9.05293e-244	3.0521e-239	0.277	0.008	9
PTPRF	0.526962	2.06852e-243	6.9738e-239	0.268	0.007	9
TTLL7	0.570528	1.18128e-239	3.98256e-235	0.254	0.007	9
CDC20	1.04763	2.47844e-239	8.35581e-235	0.33	0.013	9
PRC1	1.67609	2.6075e-237	8.79093e-233	0.42	0.025	9
PCSK1N	0.511783	9.39293e-235	3.16673e-230	0.268	0.008	9
KIF5C	0.711826	6.93661e-232	2.33861e-227	0.344	0.015	9
NFIX	0.428918	6.27727e-231	2.11632e-226	0.277	0.009	9
PLPP2	0.627025	1.05149e-229	3.54499e-225	0.326	0.014	9
NREP	0.484183	2.70088e-227	9.10574e-223	0.304	0.011	9
BEX3	1.75775	3.37239e-224	1.13697e-219	0.451	0.031	9
KIFC1	0.645583	1.08761e-223	3.66675e-219	0.286	0.01	9
GOLM1	0.479023	4.10288e-222	1.38325e-217	0.263	0.008	9
NCAPG	0.543671	5.3391e-222	1.80002e-217	0.268	0.009	9
UBE2C	1.79643	1.63965e-221	5.5279e-217	0.362	0.019	9
CLDN4	0.974885	6.23709e-221	2.10277e-216	0.388	0.022	9
ARHGAP11A	0.667449	1.40385e-216	4.73295e-212	0.317	0.014	9
PSD3	0.446979	6.88955e-216	2.32274e-211	0.263	0.009	9
ASRGL1	0.628577	8.521e-216	2.87277e-211	0.321	0.014	9
CDK1	0.978764	3.51635e-215	1.1855e-210	0.308	0.013	9
DBN1	0.475262	4.26086e-215	1.43651e-210	0.286	0.011	9
NUSAP1	2.08806	7.40833e-213	2.49764e-208	0.433	0.03	9
GPSM2	0.81688	2.02104e-212	6.81372e-208	0.362	0.019	9
KNSTRN	0.781765	1.97812e-211	6.66904e-207	0.339	0.017	9
CCDC34	0.916274	1.99099e-211	6.71242e-207	0.366	0.02	9
NDC80	0.623127	5.31892e-211	1.79322e-206	0.308	0.013	9
CEP70	1.07241	9.38239e-209	3.16318e-204	0.371	0.021	9
KIF11	0.771785	1.53917e-208	5.18917e-204	0.299	0.013	9
GNAQ	0.404305	1.75869e-208	5.92924e-204	0.263	0.009	9
PEG10	1.11235	3.25185e-206	1.09633e-201	0.353	0.019	9
SELENOP	0.677391	5.46791e-200	1.84345e-195	0.312	0.015	9
KNL1	0.734475	1.50266e-197	5.06606e-193	0.353	0.02	9
NAV1	0.5557	1.13513e-195	3.82699e-191	0.29	0.013	9
CCNA2	0.566017	3.07905e-192	1.03807e-187	0.259	0.01	9
TROAP	0.499443	1.2184e-191	4.10771e-187	0.259	0.01	9
SOX4	1.52654	3.90398e-191	1.31619e-186	0.482	0.043	9
ADD2	0.52293	1.33685e-188	4.50707e-184	0.312	0.016	9
TCEAL9	0.762658	2.79319e-187	9.41695e-183	0.348	0.021	9
RACGAP1	0.56168	2.08299e-182	7.02258e-178	0.312	0.017	9
SGO2	0.771287	7.04505e-178	2.37517e-173	0.339	0.021	9
CDKN3	1.01439	4.24213e-175	1.43019e-170	0.326	0.02	9
ZWINT	0.438471	2.78808e-173	9.39972e-169	0.281	0.014	9
PFN2	0.455106	2.44393e-171	8.23946e-167	0.295	0.016	9
HMMR	0.580051	1.77934e-170	5.99887e-166	0.268	0.013	9
DLG3	0.39261	5.68983e-168	1.91827e-163	0.259	0.012	9
CDKN2C	1.23941	1.55694e-167	5.24905e-163	0.433	0.041	9
HMGB3	1.74095	6.07e-164	2.04644e-159	0.406	0.036	9
CCNB1	1.15315	4.12637e-161	1.39116e-156	0.357	0.027	9
AURKA	0.593082	6.92746e-151	2.33552e-146	0.254	0.013	9
PTMS	2.18706	2.7757e-146	9.35799e-142	0.478	0.059	9
UBE2T	0.787071	3.51499e-146	1.18504e-141	0.353	0.029	9
MAD2L1	1.046	9.12544e-144	3.07655e-139	0.339	0.028	9
GADD45G	0.626685	1.31239e-137	4.42459e-133	0.29	0.02	9
CENPU	0.450086	8.17609e-136	2.75649e-131	0.272	0.018	9
KIF18A	0.478542	1.00127e-130	3.37569e-126	0.272	0.019	9
CNTNAP2	0.636856	1.19509e-130	4.02912e-126	0.362	0.034	9
ZFHX3	0.671362	1.43727e-129	4.84562e-125	0.357	0.034	9
CEP41	0.513269	9.77887e-129	3.29685e-124	0.281	0.02	9
CASTOR2	0.472048	2.76861e-126	9.33408e-122	0.335	0.03	9
CNN3	0.643361	2.35361e-125	7.93495e-121	0.366	0.036	9
KCNQ1OT1	1.74151	3.90621e-124	1.31694e-119	0.478	0.067	9
CDKN2A	1.35661	3.30075e-123	1.11281e-118	0.455	0.064	9
SH3PXD2A	0.505821	6.13387e-119	2.06797e-114	0.308	0.027	9
ZNF358	0.383551	1.37092e-118	4.62191e-114	0.272	0.021	9
USP13	0.488248	1.51713e-118	5.11485e-114	0.299	0.025	9
RETREG1	0.616144	1.1753e-116	3.96242e-112	0.339	0.034	9
GLUL	1.0049	3.5812e-116	1.20737e-111	0.482	0.071	9
SMC2	1.09179	1.02956e-112	3.47105e-108	0.415	0.055	9
TSC22D1	0.805738	2.53109e-112	8.53333e-108	0.353	0.039	9
ELF3	0.933122	8.59532e-112	2.89782e-107	0.263	0.021	9
MTURN	0.456486	1.68622e-111	5.68494e-107	0.272	0.022	9
CIP2A	0.485473	1.26e-108	4.24797e-104	0.295	0.027	9
ZNF43	0.596129	5.86036e-106	1.97576e-101	0.362	0.042	9
CENPW	0.562599	1.43041e-105	4.82249e-101	0.281	0.026	9
SGCE	0.369993	5.05096e-105	1.70288e-100	0.259	0.021	9
MYEF2	0.750485	7.40121e-103	2.49524e-98	0.379	0.049	9
MAP3K20	0.466322	1.66179e-101	5.60256e-97	0.299	0.03	9
CKAP5	0.839465	2.30728e-101	7.77876e-97	0.397	0.056	9
PPP2CB	0.562939	7.52639e-101	2.53745e-96	0.344	0.041	9
AK1	0.335701	1.28984e-100	4.34856e-96	0.263	0.023	9
STMN1	2.9617	1.09709e-99	3.69874e-95	0.567	0.129	9
TFDP2	1.02358	3.20522e-98	1.08061e-93	0.469	0.082	9
ATP1B1	0.52806	5.6231e-96	1.89577e-91	0.339	0.041	9
QSER1	0.510923	1.01174e-94	3.41098e-90	0.339	0.042	9
WFDC2	0.446959	2.77378e-94	9.35151e-90	0.259	0.023	9
SMC4	1.60952	6.11451e-93	2.06144e-88	0.491	0.097	9
ZNF738	0.444979	8.88357e-92	2.99501e-87	0.277	0.028	9
INCENP	0.397944	4.72935e-91	1.59445e-86	0.254	0.024	9
CDK2AP1	0.559487	9.96171e-91	3.35849e-86	0.33	0.042	9
CAMSAP1	0.534436	1.5297e-89	5.15722e-85	0.281	0.03	9
ATP2C1	0.720484	4.9878e-88	1.68159e-83	0.402	0.065	9
MLF1	0.50228	6.23182e-88	2.101e-83	0.295	0.033	9
BRD3	0.648191	1.63035e-87	5.49656e-83	0.42	0.069	9
HDGF	1.24855	2.6044e-87	8.78049e-83	0.54	0.126	9
TMPO	1.15644	1.45039e-85	4.88984e-81	0.683	0.206	9
CBX1	1.07554	1.63837e-84	5.52361e-80	0.491	0.105	9
HACD3	0.691023	3.78912e-84	1.27746e-79	0.415	0.072	9
EFCAB2	0.411644	5.58333e-84	1.88236e-79	0.321	0.041	9
SSBP3	0.543489	8.74654e-84	2.94881e-79	0.366	0.055	9
SEPTIN11	0.639444	1.16168e-82	3.91648e-78	0.357	0.054	9
PGAP1	0.474435	4.00659e-82	1.35078e-77	0.254	0.026	9
LMO7	0.539843	1.88948e-81	6.37018e-77	0.286	0.034	9
LBR	0.848333	2.82925e-81	9.53853e-77	0.589	0.149	9
SYNE2	1.31011	1.9608e-80	6.61063e-76	0.58	0.15	9
NUPR1	0.733861	3.07666e-80	1.03727e-75	0.295	0.037	9
CERS6	0.434186	6.16193e-80	2.07743e-75	0.321	0.044	9
CCDC14	0.509601	2.54921e-78	8.59439e-74	0.393	0.065	9
SOGA1	0.489708	1.17869e-77	3.97384e-73	0.312	0.042	9
SGO1	0.379076	1.95944e-77	6.60606e-73	0.254	0.028	9
CRIP2	0.584445	1.22104e-76	4.11663e-72	0.321	0.045	9
PTTG1	1.41049	4.20177e-76	1.41659e-71	0.402	0.077	9
CADM1	0.712386	1.70923e-75	5.76251e-71	0.375	0.066	9
LMO2	0.598133	2.85761e-74	9.63414e-70	0.344	0.053	9
DZIP3	0.416983	4.81576e-74	1.62359e-69	0.326	0.048	9
RTL8A	0.481093	1.56395e-73	5.27269e-69	0.33	0.05	9
GTF2I	1.23693	1.32468e-72	4.46604e-68	0.674	0.243	9
HLTF	0.592116	1.80337e-72	6.07989e-68	0.366	0.063	9
ZNF254	0.420346	1.86558e-72	6.28962e-68	0.268	0.033	9
RPL39L	0.636089	1.26015e-71	4.24848e-67	0.357	0.062	9
LMNB1	0.678274	1.54061e-71	5.19401e-67	0.397	0.073	9
DESI2	0.73925	6.2276e-71	2.09957e-66	0.46	0.102	9
SEPHS1	0.585476	9.73433e-71	3.28183e-66	0.353	0.06	9
NFIC	0.622735	1.09749e-70	3.70008e-66	0.393	0.074	9
APP	0.815289	1.58947e-69	5.35875e-65	0.549	0.143	9
CENPV	0.485008	2.16556e-68	7.30098e-64	0.33	0.053	9
NSD2	0.58846	3.78642e-68	1.27655e-63	0.366	0.066	9
[truncated: 2,664 more rows]

## Sheet: Myeloid cells
Table S2. List of genes specific to the cell clusters in total cells and each cell lineage.
[truncated: 10,669 more rows]
