# Supplementary material for: Unveiling the influence of tumor and immune signatures on immune checkpoint therapy in advanced lung cancer
Source: eLife. 2024 Nov 8;13:RP98366. doi: 10.7554/eLife.98366 (PMC11548875; doi:10.7554/eLife.98366)
Supplement: Supplementary file 3. [file elife-98366-supp3.xlsx]

## Sheet: Responder vs. Non-responder
Table S3. List of DEGs in comparison between ICI response groups.
gene	avg_logFC	p_val	p_val_adj	pct.1	pct.2	celltype	group
LYZ	1.90992	0	0	0.548	0.073	Malignant cells	Responder vs. Non-responder
SNHG29	1.37906	0	0	0.877	0.742	Malignant cells	Responder vs. Non-responder
RPS4Y1	1.27217	0	0	0.787	0.254	Malignant cells	Responder vs. Non-responder
GAS5	1.22628	0	0	0.85	0.701	Malignant cells	Responder vs. Non-responder
RPL13A	1.21676	0	0	0.963	0.889	Malignant cells	Responder vs. Non-responder
SLC25A6	1.20416	0	0	0.853	0.738	Malignant cells	Responder vs. Non-responder
RPS17	1.15665	0	0	0.907	0.839	Malignant cells	Responder vs. Non-responder
RPL17	1.11703	0	0	0.945	0.9	Malignant cells	Responder vs. Non-responder
RPL27A	1.09379	0	0	0.932	0.855	Malignant cells	Responder vs. Non-responder
MT3	1.06294	0	0	0.461	0.01	Malignant cells	Responder vs. Non-responder
SNHG5	1.06212	0	0	0.774	0.535	Malignant cells	Responder vs. Non-responder
RPL23A	1.0473	0	0	0.956	0.92	Malignant cells	Responder vs. Non-responder
ZFAS1	1.01915	0	0	0.878	0.709	Malignant cells	Responder vs. Non-responder
RPS2	0.973088	0	0	0.967	0.937	Malignant cells	Responder vs. Non-responder
RPL3	0.972698	0	0	0.957	0.927	Malignant cells	Responder vs. Non-responder
RPS6	0.96998	0	0	0.975	0.924	Malignant cells	Responder vs. Non-responder
RPL21	0.939081	0	0	0.944	0.888	Malignant cells	Responder vs. Non-responder
RPL4	0.890236	0	0	0.92	0.839	Malignant cells	Responder vs. Non-responder
SNHG8	0.875973	0	0	0.765	0.537	Malignant cells	Responder vs. Non-responder
RPL7	0.875874	0	0	0.94	0.869	Malignant cells	Responder vs. Non-responder
EEF1G	0.860903	0	0	0.933	0.842	Malignant cells	Responder vs. Non-responder
RPL5	0.846653	0	0	0.937	0.867	Malignant cells	Responder vs. Non-responder
RPL23	0.838459	0	0	0.898	0.848	Malignant cells	Responder vs. Non-responder
RPL6	0.832235	0	0	0.952	0.902	Malignant cells	Responder vs. Non-responder
RPL19	0.800781	0	0	0.965	0.962	Malignant cells	Responder vs. Non-responder
RACK1	0.787891	0	0	0.938	0.877	Malignant cells	Responder vs. Non-responder
RPL7A	0.783136	0	0	0.957	0.921	Malignant cells	Responder vs. Non-responder
FGGY	0.782397	0	0	0.58	0.162	Malignant cells	Responder vs. Non-responder
RPL31	0.761135	0	0	0.917	0.869	Malignant cells	Responder vs. Non-responder
RPL10A	0.761069	0	0	0.951	0.897	Malignant cells	Responder vs. Non-responder
RPS18	0.759334	0	0	0.983	0.971	Malignant cells	Responder vs. Non-responder
RPS9	0.757958	0	0	0.951	0.914	Malignant cells	Responder vs. Non-responder
CEACAM6	0.757295	7.22539e-85	2.43597e-80	0.429	0.267	Malignant cells	Responder vs. Non-responder
SNHG7	0.75486	0	0	0.715	0.501	Malignant cells	Responder vs. Non-responder
RPS20	0.754561	0	0	0.908	0.805	Malignant cells	Responder vs. Non-responder
RAB3C	0.749261	0	0	0.474	0.018	Malignant cells	Responder vs. Non-responder
NACA	0.739502	0	0	0.939	0.887	Malignant cells	Responder vs. Non-responder
RPL14	0.735752	0	0	0.947	0.896	Malignant cells	Responder vs. Non-responder
RPSA	0.7291	0	0	0.938	0.851	Malignant cells	Responder vs. Non-responder
RPL13	0.725854	0	0	0.989	0.969	Malignant cells	Responder vs. Non-responder
RPLP2	0.723287	0	0	0.953	0.923	Malignant cells	Responder vs. Non-responder
RPS7	0.722751	0	0	0.972	0.942	Malignant cells	Responder vs. Non-responder
RPS14	0.715999	0	0	0.973	0.953	Malignant cells	Responder vs. Non-responder
RPL34	0.705922	0	0	0.958	0.934	Malignant cells	Responder vs. Non-responder
RPS3A	0.697906	0	0	0.966	0.933	Malignant cells	Responder vs. Non-responder
RPL15	0.686788	0	0	0.956	0.917	Malignant cells	Responder vs. Non-responder
TMEM176B	0.685957	0	0	0.504	0.028	Malignant cells	Responder vs. Non-responder
RPL29	0.678136	0	0	0.954	0.929	Malignant cells	Responder vs. Non-responder
CAMP	0.669819	0	0	0.361	0.004	Malignant cells	Responder vs. Non-responder
KIT	0.668999	0	0	0.498	0.017	Malignant cells	Responder vs. Non-responder
RPL18A	0.667789	0	0	0.956	0.944	Malignant cells	Responder vs. Non-responder
RPL24	0.661679	0	0	0.959	0.884	Malignant cells	Responder vs. Non-responder
EPB41L4A-AS1	0.657995	0	0	0.653	0.379	Malignant cells	Responder vs. Non-responder
EEF1B2	0.643615	0	0	0.897	0.797	Malignant cells	Responder vs. Non-responder
ID2	0.643231	0	0	0.529	0.169	Malignant cells	Responder vs. Non-responder
RPL27	0.633184	0	0	0.931	0.893	Malignant cells	Responder vs. Non-responder
RPL37A	0.627701	0	0	0.943	0.891	Malignant cells	Responder vs. Non-responder
RPS5	0.619636	0	0	0.957	0.914	Malignant cells	Responder vs. Non-responder
RPL11	0.618137	0	0	0.974	0.954	Malignant cells	Responder vs. Non-responder
RPL12	0.616685	4.31327e-288	1.45418e-283	0.96	0.947	Malignant cells	Responder vs. Non-responder
RPL32	0.610347	0	0	0.974	0.955	Malignant cells	Responder vs. Non-responder
HLA-DQB1	0.606823	0	0	0.559	0.128	Malignant cells	Responder vs. Non-responder
ADIRF	0.586356	0	0	0.571	0.172	Malignant cells	Responder vs. Non-responder
INSIG1	0.577555	0	0	0.604	0.282	Malignant cells	Responder vs. Non-responder
EMB	0.571627	0	0	0.548	0.132	Malignant cells	Responder vs. Non-responder
HLA-DRA	0.569251	0	0	0.741	0.31	Malignant cells	Responder vs. Non-responder
RPL38	0.56427	5.82295e-254	1.96315e-249	0.914	0.88	Malignant cells	Responder vs. Non-responder
RPS3	0.557266	0	0	0.975	0.944	Malignant cells	Responder vs. Non-responder
NPM1	0.550978	1.26291e-277	4.25776e-273	0.898	0.833	Malignant cells	Responder vs. Non-responder
BTF3	0.550103	0	0	0.9	0.824	Malignant cells	Responder vs. Non-responder
RPL9	0.549683	3.30234e-221	1.11335e-216	0.93	0.898	Malignant cells	Responder vs. Non-responder
RPL18	0.548053	0	0	0.959	0.919	Malignant cells	Responder vs. Non-responder
RPL36	0.547247	9.44637e-284	3.18475e-279	0.939	0.927	Malignant cells	Responder vs. Non-responder
CREG1	0.544783	5.91273e-301	1.99342e-296	0.652	0.426	Malignant cells	Responder vs. Non-responder
TMEM176A	0.538276	0	0	0.442	0.025	Malignant cells	Responder vs. Non-responder
PDK4	0.538187	0	0	0.476	0.116	Malignant cells	Responder vs. Non-responder
EEF2	0.532939	0	0	0.898	0.79	Malignant cells	Responder vs. Non-responder
NAP1L1	0.524811	0	0	0.807	0.61	Malignant cells	Responder vs. Non-responder
RPS25	0.522852	0	0	0.965	0.914	Malignant cells	Responder vs. Non-responder
EVI2B	0.522615	0	0	0.42	0.04	Malignant cells	Responder vs. Non-responder
RPS23	0.518599	0	0	0.967	0.943	Malignant cells	Responder vs. Non-responder
RAB11FIP1	0.517497	0	0	0.729	0.43	Malignant cells	Responder vs. Non-responder
PFDN5	0.502969	0	0	0.908	0.819	Malignant cells	Responder vs. Non-responder
APOC1	0.499016	5.72334e-21	1.92957e-16	0.285	0.236	Malignant cells	Responder vs. Non-responder
RPL22	0.490455	0	0	0.932	0.875	Malignant cells	Responder vs. Non-responder
RPS8	0.477786	0	0	0.975	0.952	Malignant cells	Responder vs. Non-responder
RPL41	0.473839	0	0	0.993	0.993	Malignant cells	Responder vs. Non-responder
UBXN1	0.473286	0	0	0.784	0.532	Malignant cells	Responder vs. Non-responder
LDLRAD4	0.47199	0	0	0.454	0.09	Malignant cells	Responder vs. Non-responder
CALML3	0.468422	4.46556e-143	1.50552e-138	0.414	0.179	Malignant cells	Responder vs. Non-responder
RPL26	0.468068	0	0	0.967	0.924	Malignant cells	Responder vs. Non-responder
NOP53	0.464836	0	0	0.808	0.616	Malignant cells	Responder vs. Non-responder
EIF3D	0.459611	0	0	0.797	0.565	Malignant cells	Responder vs. Non-responder
EIF3M	0.452485	0	0	0.745	0.545	Malignant cells	Responder vs. Non-responder
RPS15A	0.451864	0	0	0.968	0.945	Malignant cells	Responder vs. Non-responder
SNHG3	0.449924	0	0	0.554	0.246	Malignant cells	Responder vs. Non-responder
RPLP0	0.438822	0	0	0.974	0.947	Malignant cells	Responder vs. Non-responder
SNHG32	0.434133	3.08215e-283	1.03912e-278	0.771	0.53	Malignant cells	Responder vs. Non-responder
RPS19	0.432126	0	0	0.989	0.974	Malignant cells	Responder vs. Non-responder
RPS13	0.421411	0	0	0.945	0.929	Malignant cells	Responder vs. Non-responder
RPS27A	0.420063	0	0	0.976	0.963	Malignant cells	Responder vs. Non-responder
RPL35A	0.417081	0	0	0.954	0.943	Malignant cells	Responder vs. Non-responder
UBA52	0.41277	2.11922e-286	7.14473e-282	0.915	0.875	Malignant cells	Responder vs. Non-responder
CRYM	0.409156	0	0	0.457	0.118	Malignant cells	Responder vs. Non-responder
ERP29	0.404932	0	0	0.828	0.622	Malignant cells	Responder vs. Non-responder
MIB2	0.40475	0	0	0.552	0.226	Malignant cells	Responder vs. Non-responder
RHOBTB3	0.400694	1.41256e-124	4.7623e-120	0.426	0.256	Malignant cells	Responder vs. Non-responder
COX4I1	0.397644	0	0	0.895	0.798	Malignant cells	Responder vs. Non-responder
RAB27B	0.396574	6.19236e-152	2.08769e-147	0.39	0.206	Malignant cells	Responder vs. Non-responder
ATP5PO	0.39588	0	0	0.83	0.627	Malignant cells	Responder vs. Non-responder
RPS11	0.394343	0	0	0.923	0.842	Malignant cells	Responder vs. Non-responder
HLA-DRB5	0.392316	0	0	0.494	0.139	Malignant cells	Responder vs. Non-responder
RPS4X	0.389495	0	0	0.961	0.948	Malignant cells	Responder vs. Non-responder
PMAIP1	0.389418	6.40373e-201	2.15895e-196	0.606	0.397	Malignant cells	Responder vs. Non-responder
HLA-DRB1	0.383882	0	0	0.594	0.189	Malignant cells	Responder vs. Non-responder
CD74	0.383264	1.24594e-303	4.20057e-299	0.806	0.497	Malignant cells	Responder vs. Non-responder
SOX4	0.381866	2.12074e-09	7.14987e-05	0.637	0.582	Malignant cells	Responder vs. Non-responder
ATP5F1D	0.381693	0	0	0.827	0.652	Malignant cells	Responder vs. Non-responder
EIF3F	0.379924	2.87574e-282	9.69528e-278	0.803	0.623	Malignant cells	Responder vs. Non-responder
IGFBP6	0.379781	0	0	0.304	0.031	Malignant cells	Responder vs. Non-responder
IMPDH2	0.376291	1.42103e-287	4.79085e-283	0.709	0.474	Malignant cells	Responder vs. Non-responder
FAU	0.372173	0	0	0.948	0.896	Malignant cells	Responder vs. Non-responder
GCLC	0.371683	1.44238e-216	4.86285e-212	0.625	0.39	Malignant cells	Responder vs. Non-responder
CLEC2B	0.370182	0	0	0.483	0.175	Malignant cells	Responder vs. Non-responder
RPS15	0.369347	2.11362e-279	7.12585e-275	0.965	0.944	Malignant cells	Responder vs. Non-responder
EIF3G	0.366287	5.68108e-285	1.91532e-280	0.786	0.596	Malignant cells	Responder vs. Non-responder
LGALS9	0.364145	0	0	0.539	0.217	Malignant cells	Responder vs. Non-responder
RPL35	0.363923	3.47182e-220	1.17049e-215	0.948	0.922	Malignant cells	Responder vs. Non-responder
PEBP1	0.363546	6.80046e-224	2.29271e-219	0.85	0.673	Malignant cells	Responder vs. Non-responder
TPT1	0.361994	7.23607e-237	2.43957e-232	0.969	0.929	Malignant cells	Responder vs. Non-responder
MALAT1	0.352828	9.73568e-262	3.28229e-257	0.922	0.748	Malignant cells	Responder vs. Non-responder
GFI1B	0.350911	0	0	0.342	0.001	Malignant cells	Responder vs. Non-responder
NUPR1	0.349677	5.26867e-225	1.77628e-220	0.567	0.275	Malignant cells	Responder vs. Non-responder
ZNF581	0.346351	2.73936e-272	9.23546e-268	0.556	0.316	Malignant cells	Responder vs. Non-responder
CFD	0.343713	0	0	0.568	0.216	Malignant cells	Responder vs. Non-responder
HMGA1	0.341899	2.71443e-208	9.15143e-204	0.837	0.661	Malignant cells	Responder vs. Non-responder
HLA-DPB1	0.339717	0	0	0.532	0.183	Malignant cells	Responder vs. Non-responder
CXCL8	0.339176	5.74886e-171	1.93817e-166	0.424	0.198	Malignant cells	Responder vs. Non-responder
NFIA	0.336788	2.17606e-285	7.33638e-281	0.56	0.279	Malignant cells	Responder vs. Non-responder
CRYL1	0.332389	0	0	0.488	0.208	Malignant cells	Responder vs. Non-responder
CHPT1	0.331914	4.847e-264	1.63412e-259	0.533	0.273	Malignant cells	Responder vs. Non-responder
CIRBP	0.326272	1.27893e-232	4.31179e-228	0.81	0.615	Malignant cells	Responder vs. Non-responder
ZNF428	0.32262	6.24748e-241	2.10628e-236	0.653	0.417	Malignant cells	Responder vs. Non-responder
PRSS21	0.319586	0	0	0.386	0.065	Malignant cells	Responder vs. Non-responder
RPS12	0.315637	4.07397e-201	1.3735e-196	0.969	0.962	Malignant cells	Responder vs. Non-responder
ATP5MC2	0.314795	1.27025e-266	4.28253e-262	0.901	0.824	Malignant cells	Responder vs. Non-responder
EIF3E	0.314155	3.74402e-163	1.26226e-158	0.834	0.738	Malignant cells	Responder vs. Non-responder
PLA1A	0.313141	0	0	0.321	0.014	Malignant cells	Responder vs. Non-responder
LETMD1	0.31207	4.54715e-263	1.53303e-258	0.545	0.302	Malignant cells	Responder vs. Non-responder
FABP5	0.311657	3.51984e-46	1.18668e-41	0.381	0.264	Malignant cells	Responder vs. Non-responder
LINC01326	0.310762	0	0	0.314	0	Malignant cells	Responder vs. Non-responder
C12orf57	0.308369	2.11071e-240	7.11605e-236	0.803	0.583	Malignant cells	Responder vs. Non-responder
NOB1	0.30588	4.62483e-241	1.55921e-236	0.58	0.35	Malignant cells	Responder vs. Non-responder
BCAT1	0.30523	0	0	0.43	0.101	Malignant cells	Responder vs. Non-responder
RAMP2	0.303954	0	0	0.346	0.037	Malignant cells	Responder vs. Non-responder
RPS28	0.302336	8.51335e-188	2.87019e-183	0.947	0.936	Malignant cells	Responder vs. Non-responder
KRT18	0.302141	6.06265e-108	2.04396e-103	0.923	0.786	Malignant cells	Responder vs. Non-responder
RNASE6	0.299583	0	0	0.271	0.018	Malignant cells	Responder vs. Non-responder
ABRAXAS1	0.298684	2.3171e-277	7.81188e-273	0.411	0.155	Malignant cells	Responder vs. Non-responder
ATF4	0.298574	1.19916e-245	4.04286e-241	0.78	0.56	Malignant cells	Responder vs. Non-responder
RRAD	0.298465	1.15983e-222	3.91025e-218	0.355	0.112	Malignant cells	Responder vs. Non-responder
METTL7A	0.297985	5.83801e-297	1.96823e-292	0.455	0.157	Malignant cells	Responder vs. Non-responder
PLAGL1	0.295947	4.31532e-266	1.45487e-261	0.363	0.114	Malignant cells	Responder vs. Non-responder
RPLP1	0.294786	2.17219e-260	7.32333e-256	0.989	0.986	Malignant cells	Responder vs. Non-responder
SNHG6	0.286847	2.09468e-187	7.06201e-183	0.816	0.664	Malignant cells	Responder vs. Non-responder
DANCR	0.285535	9.55274e-199	3.22061e-194	0.642	0.431	Malignant cells	Responder vs. Non-responder
SEC11A	0.285307	2.34267e-211	7.89807e-207	0.802	0.616	Malignant cells	Responder vs. Non-responder
RPS21	0.284306	1.50606e-209	5.07752e-205	0.936	0.9	Malignant cells	Responder vs. Non-responder
DYRK4	0.28231	5.6876e-238	1.91752e-233	0.508	0.262	Malignant cells	Responder vs. Non-responder
PDLIM1	0.280319	3.23779e-218	1.09159e-213	0.757	0.507	Malignant cells	Responder vs. Non-responder
C19orf48	0.279337	4.46942e-213	1.50682e-208	0.597	0.377	Malignant cells	Responder vs. Non-responder
NBEAL1	0.277891	1.05296e-257	3.54996e-253	0.572	0.329	Malignant cells	Responder vs. Non-responder
FBL	0.277721	5.91119e-232	1.9929e-227	0.81	0.574	Malignant cells	Responder vs. Non-responder
CLTA	0.276306	3.36308e-187	1.13383e-182	0.845	0.688	Malignant cells	Responder vs. Non-responder
CAMK2B	0.275543	0	0	0.271	0.028	Malignant cells	Responder vs. Non-responder
PAX1	0.272801	0	0	0.274	0	Malignant cells	Responder vs. Non-responder
CYTIP	0.271592	0	0	0.379	0.061	Malignant cells	Responder vs. Non-responder
SLC34A2	0.268466	1.43814e-25	4.84854e-21	0.193	0.296	Malignant cells	Responder vs. Non-responder
C4orf48	0.265886	6.44115e-113	2.17157e-108	0.581	0.408	Malignant cells	Responder vs. Non-responder
LINC00662	0.265486	1.64729e-08	0.000555368	0.257	0.239	Malignant cells	Responder vs. Non-responder
RPS24	0.260599	6.13541e-169	2.06849e-164	0.962	0.938	Malignant cells	Responder vs. Non-responder
EEF1D	0.260327	2.35052e-163	7.92455e-159	0.894	0.825	Malignant cells	Responder vs. Non-responder
FCGRT	0.259657	6.70658e-199	2.26106e-194	0.671	0.42	Malignant cells	Responder vs. Non-responder
YBX1	0.25808	3.54909e-193	1.19654e-188	0.899	0.82	Malignant cells	Responder vs. Non-responder
GM2A	0.258072	2.14573e-181	7.23413e-177	0.397	0.191	Malignant cells	Responder vs. Non-responder
LRBA	0.257933	5.07382e-217	1.71059e-212	0.493	0.265	Malignant cells	Responder vs. Non-responder
CCND2	0.252671	1.01011e-281	3.40548e-277	0.395	0.116	Malignant cells	Responder vs. Non-responder
WDR11	0.252071	5.75174e-12	1.93914e-07	0.268	0.241	Malignant cells	Responder vs. Non-responder
SNHG14	0.252068	3.51076e-190	1.18362e-185	0.308	0.104	Malignant cells	Responder vs. Non-responder
EIF3L	0.250684	1.68466e-218	5.67966e-214	0.773	0.57	Malignant cells	Responder vs. Non-responder
PSMC3	-0.250212	5.62654e-24	1.89693e-19	0.393	0.469	Malignant cells	Responder vs. Non-responder
MAP1LC3B	-0.250284	8.16664e-12	2.7533e-07	0.477	0.504	Malignant cells	Responder vs. Non-responder
DDRGK1	-0.250469	8.29795e-50	2.79757e-45	0.442	0.519	Malignant cells	Responder vs. Non-responder
STK38L	-0.25066	2.11392e-37	7.12686e-33	0.188	0.269	Malignant cells	Responder vs. Non-responder
ELOVL5	-0.250803	4.21587e-119	1.42134e-114	0.247	0.419	Malignant cells	Responder vs. Non-responder
MTLN	-0.250934	1.68476e-44	5.68001e-40	0.359	0.464	Malignant cells	Responder vs. Non-responder
CSNK2B	-0.251217	1.75708e-22	5.92381e-18	0.698	0.656	Malignant cells	Responder vs. Non-responder
CXCL16	-0.251367	3.95479e-75	1.33332e-70	0.215	0.356	Malignant cells	Responder vs. Non-responder
PSMA5	-0.25139	6.08359e-16	2.05102e-11	0.591	0.58	Malignant cells	Responder vs. Non-responder
G3BP2	-0.25152	5.18856e-83	1.74927e-78	0.32	0.473	Malignant cells	Responder vs. Non-responder
YWHAG	-0.251627	5.46832e-44	1.84359e-39	0.383	0.473	Malignant cells	Responder vs. Non-responder
MTX1	-0.251699	8.50742e-103	2.86819e-98	0.307	0.465	Malignant cells	Responder vs. Non-responder
LGALS1	-0.252225	1.99018e-44	6.70969e-40	0.254	0.355	Malignant cells	Responder vs. Non-responder
CHCHD1	-0.252359	1.35434e-21	4.56604e-17	0.447	0.498	Malignant cells	Responder vs. Non-responder
VMA21	-0.252532	7.69832e-61	2.59541e-56	0.334	0.449	Malignant cells	Responder vs. Non-responder
ARFGAP3	-0.252913	1.19567e-124	4.0311e-120	0.213	0.396	Malignant cells	Responder vs. Non-responder
C11orf58	-0.252925	1.52712e-20	5.14854e-16	0.621	0.615	Malignant cells	Responder vs. Non-responder
PTS	-0.253006	1.65403e-52	5.5764e-48	0.338	0.447	Malignant cells	Responder vs. Non-responder
COPE	-0.253415	1.3448e-18	4.53384e-14	0.67	0.64	Malignant cells	Responder vs. Non-responder
MEA1	-0.254032	2.62288e-42	8.84278e-38	0.457	0.55	Malignant cells	Responder vs. Non-responder
CHMP4A	-0.254062	6.25765e-32	2.10971e-27	0.422	0.486	Malignant cells	Responder vs. Non-responder
ATXN10	-0.254188	1.22936e-31	4.14467e-27	0.376	0.446	Malignant cells	Responder vs. Non-responder
SENP6	-0.254217	6.92995e-86	2.33636e-81	0.269	0.414	Malignant cells	Responder vs. Non-responder
UFM1	-0.254952	4.78965e-60	1.61478e-55	0.363	0.481	Malignant cells	Responder vs. Non-responder
CLINT1	-0.25507	1.46574e-89	4.9416e-85	0.306	0.473	Malignant cells	Responder vs. Non-responder
SLC2A4RG	-0.255246	2.6108e-89	8.80204e-85	0.246	0.406	Malignant cells	Responder vs. Non-responder
TPD52L2	-0.255325	3.27401e-54	1.1038e-49	0.29	0.424	Malignant cells	Responder vs. Non-responder
CISD3	-0.255531	1.31052e-09	4.41828e-05	0.442	0.46	Malignant cells	Responder vs. Non-responder
DMKN	-0.256045	5.94281e-75	2.00356e-70	0.212	0.363	Malignant cells	Responder vs. Non-responder
NDUFB6	-0.256134	4.48823e-56	1.51316e-51	0.417	0.531	Malignant cells	Responder vs. Non-responder
RAB5C	-0.256193	1.09452e-21	3.69007e-17	0.59	0.592	Malignant cells	Responder vs. Non-responder
MRPS18C	-0.256934	3.90612e-17	1.31691e-12	0.495	0.526	Malignant cells	Responder vs. Non-responder
RALA	-0.257025	1.9749e-18	6.65819e-14	0.449	0.494	Malignant cells	Responder vs. Non-responder
NDUFS5	-0.257042	4.11356e-30	1.38684e-25	0.853	0.777	Malignant cells	Responder vs. Non-responder
HTATIP2	-0.257194	9.66735e-80	3.25925e-75	0.297	0.442	Malignant cells	Responder vs. Non-responder
NDUFB8	-0.257213	1.68119e-13	5.66795e-09	0.68	0.62	Malignant cells	Responder vs. Non-responder
UFC1	-0.257422	5.55833e-08	0.00187394	0.737	0.661	Malignant cells	Responder vs. Non-responder
CAP1	-0.257484	5.96359e-69	2.01056e-64	0.441	0.568	Malignant cells	Responder vs. Non-responder
WDR34	-0.257838	3.98752e-61	1.34435e-56	0.283	0.424	Malignant cells	Responder vs. Non-responder
HNRNPF	-0.257843	1.69642e-30	5.71932e-26	0.673	0.649	Malignant cells	Responder vs. Non-responder
YES1	-0.257937	2.18402e-95	7.36321e-91	0.183	0.334	Malignant cells	Responder vs. Non-responder
PDCD10	-0.258072	4.49037e-100	1.51388e-95	0.346	0.516	Malignant cells	Responder vs. Non-responder
TMEM238	-0.258654	6.98812e-144	2.35598e-139	0.164	0.379	Malignant cells	Responder vs. Non-responder
UQCC2	-0.258797	2.67677e-07	0.00902446	0.57	0.556	Malignant cells	Responder vs. Non-responder
LAMB3	-0.258815	1.37816e-132	4.64634e-128	0.176	0.376	Malignant cells	Responder vs. Non-responder
FOXQ1	-0.258871	3.22336e-209	1.08672e-204	0.065	0.262	Malignant cells	Responder vs. Non-responder
MYO1E	-0.259707	2.67177e-114	9.0076e-110	0.139	0.297	Malignant cells	Responder vs. Non-responder
EIF2S1	-0.259871	2.63697e-74	8.89028e-70	0.288	0.432	Malignant cells	Responder vs. Non-responder
VPS25	-0.260161	3.49488e-42	1.17826e-37	0.364	0.46	Malignant cells	Responder vs. Non-responder
SERTAD1	-0.261012	8.66267e-34	2.92053e-29	0.359	0.459	Malignant cells	Responder vs. Non-responder
SCOC	-0.261443	4.03163e-50	1.35922e-45	0.356	0.462	Malignant cells	Responder vs. Non-responder
SLC50A1	-0.261664	2.10881e-128	7.10963e-124	0.25	0.438	Malignant cells	Responder vs. Non-responder
TMBIM4	-0.261689	3.77739e-24	1.27351e-19	0.564	0.563	Malignant cells	Responder vs. Non-responder
CLTB	-0.262273	3.22422e-35	1.08701e-30	0.455	0.521	Malignant cells	Responder vs. Non-responder
DUSP5	-0.262421	2.80401e-14	9.45345e-10	0.236	0.284	Malignant cells	Responder vs. Non-responder
CYB5R3	-0.262448	7.90073e-50	2.66365e-45	0.387	0.496	Malignant cells	Responder vs. Non-responder
IDH3G	-0.262955	1.17443e-42	3.95947e-38	0.403	0.489	Malignant cells	Responder vs. Non-responder
RPL39L	-0.26297	4.27128e-84	1.44002e-79	0.244	0.397	Malignant cells	Responder vs. Non-responder
STK17A	-0.263634	4.0577e-94	1.36801e-89	0.246	0.409	Malignant cells	Responder vs. Non-responder
EAPP	-0.264077	2.63447e-66	8.88185e-62	0.327	0.467	Malignant cells	Responder vs. Non-responder
SYPL1	-0.264634	3.82201e-112	1.28855e-107	0.377	0.54	Malignant cells	Responder vs. Non-responder
ATP6V0B	-0.264636	1.61264e-16	5.43685e-12	0.661	0.607	Malignant cells	Responder vs. Non-responder
NDUFA13	-0.265082	1.48943e-43	5.02147e-39	0.801	0.729	Malignant cells	Responder vs. Non-responder
SDC1	-0.265461	1.25979e-62	4.24724e-58	0.396	0.507	Malignant cells	Responder vs. Non-responder
MYL9	-0.265607	1.02618e-80	3.45967e-76	0.167	0.313	Malignant cells	Responder vs. Non-responder
UBA2	-0.266148	1.22959e-25	4.14543e-21	0.467	0.521	Malignant cells	Responder vs. Non-responder
PMEPA1	-0.266163	3.4637e-180	1.16775e-175	0.1	0.309	Malignant cells	Responder vs. Non-responder
BET1	-0.26628	6.83604e-97	2.3047e-92	0.243	0.406	Malignant cells	Responder vs. Non-responder
GID8	-0.266771	4.26533e-58	1.43801e-53	0.344	0.46	Malignant cells	Responder vs. Non-responder
ABHD11	-0.267388	1.432e-31	4.82784e-27	0.313	0.396	Malignant cells	Responder vs. Non-responder
KLF10	-0.267731	1.30311e-77	4.39332e-73	0.264	0.41	Malignant cells	Responder vs. Non-responder
PAPOLA	-0.268026	6.26665e-36	2.11274e-31	0.549	0.57	Malignant cells	Responder vs. Non-responder
GTF2H5	-0.268219	5.1678e-34	1.74227e-29	0.438	0.51	Malignant cells	Responder vs. Non-responder
ANKRD12	-0.26826	2.19836e-82	7.41154e-78	0.321	0.465	Malignant cells	Responder vs. Non-responder
POLR2J	-0.268315	2.03826e-16	6.8718e-12	0.615	0.583	Malignant cells	Responder vs. Non-responder
DHRS3	-0.268376	3.22343e-156	1.08675e-151	0.124	0.313	Malignant cells	Responder vs. Non-responder
SMAP1	-0.268381	1.2585e-72	4.24291e-68	0.323	0.453	Malignant cells	Responder vs. Non-responder
PSMA2	-0.268534	1.2877e-20	4.34135e-16	0.733	0.669	Malignant cells	Responder vs. Non-responder
SAP18	-0.268808	5.68593e-36	1.91696e-31	0.742	0.693	Malignant cells	Responder vs. Non-responder
HMGN3	-0.269355	7.42157e-30	2.50211e-25	0.697	0.656	Malignant cells	Responder vs. Non-responder
FAM177A1	-0.270323	1.9072e-56	6.42995e-52	0.428	0.543	Malignant cells	Responder vs. Non-responder
NDUFC1	-0.270429	1.26262e-19	4.2568e-15	0.641	0.626	Malignant cells	Responder vs. Non-responder
LSM8	-0.270719	4.92091e-37	1.65903e-32	0.544	0.576	Malignant cells	Responder vs. Non-responder
MRPL27	-0.271112	1.31278e-26	4.42589e-22	0.523	0.546	Malignant cells	Responder vs. Non-responder
HNRNPAB	-0.271388	1.81861e-24	6.13126e-20	0.527	0.559	Malignant cells	Responder vs. Non-responder
RIOK3	-0.271955	1.44039e-103	4.85613e-99	0.243	0.422	Malignant cells	Responder vs. Non-responder
DNAJB6	-0.27196	5.11556e-34	1.72466e-29	0.595	0.601	Malignant cells	Responder vs. Non-responder
ADH5	-0.272193	6.97464e-97	2.35143e-92	0.361	0.518	Malignant cells	Responder vs. Non-responder
MPLKIP	-0.272665	3.26809e-65	1.1018e-60	0.419	0.522	Malignant cells	Responder vs. Non-responder
ATP6V1C1	-0.272676	4.31527e-74	1.45485e-69	0.252	0.391	Malignant cells	Responder vs. Non-responder
CTSL	-0.272754	1.21688e-100	4.10258e-96	0.179	0.336	Malignant cells	Responder vs. Non-responder
UQCR11	-0.273002	3.52996e-37	1.19009e-32	0.817	0.758	Malignant cells	Responder vs. Non-responder
RNASEH2C	-0.273306	4.68354e-21	1.57901e-16	0.405	0.449	Malignant cells	Responder vs. Non-responder
IGFBP4	-0.274457	9.79156e-190	3.30113e-185	0.15	0.39	Malignant cells	Responder vs. Non-responder
ITGA2	-0.274853	4.97425e-137	1.67702e-132	0.114	0.28	Malignant cells	Responder vs. Non-responder
NDUFA6	-0.274867	2.25719e-33	7.6099e-29	0.621	0.626	Malignant cells	Responder vs. Non-responder
DDX24	-0.274892	2.5525e-55	8.60551e-51	0.442	0.53	Malignant cells	Responder vs. Non-responder
HSPH1	-0.275202	8.46052e-37	2.85238e-32	0.399	0.481	Malignant cells	Responder vs. Non-responder
KATNBL1	-0.27593	1.43232e-31	4.82892e-27	0.266	0.355	Malignant cells	Responder vs. Non-responder
SSR3	-0.276028	5.17424e-51	1.74444e-46	0.628	0.629	Malignant cells	Responder vs. Non-responder
SYNGR2	-0.276871	3.4846e-13	1.1748e-08	0.643	0.607	Malignant cells	Responder vs. Non-responder
RTL8C	-0.277033	2.65634e-34	8.95559e-30	0.338	0.427	Malignant cells	Responder vs. Non-responder
TACC1	-0.277163	8.3078e-100	2.80089e-95	0.121	0.262	Malignant cells	Responder vs. Non-responder
ECHS1	-0.277163	2.11621e-19	7.1346e-15	0.556	0.557	Malignant cells	Responder vs. Non-responder
FAM50A	-0.277227	4.77205e-113	1.60885e-108	0.326	0.524	Malignant cells	Responder vs. Non-responder
IFITM2	-0.278351	1.57178e-08	0.00052991	0.288	0.325	Malignant cells	Responder vs. Non-responder
NCL	-0.279332	2.15153e-21	7.25365e-17	0.746	0.692	Malignant cells	Responder vs. Non-responder
SNX9	-0.27958	1.75354e-131	5.9119e-127	0.142	0.313	Malignant cells	Responder vs. Non-responder
CBR1	-0.279799	1.18372e-70	3.99078e-66	0.355	0.481	Malignant cells	Responder vs. Non-responder
JUND	-0.280001	5.24209e-42	1.76732e-37	0.609	0.63	Malignant cells	Responder vs. Non-responder
SERP1	-0.280041	3.56454e-22	1.20175e-17	0.853	0.756	Malignant cells	Responder vs. Non-responder
MTUS1	-0.280893	2.75872e-145	9.30074e-141	0.223	0.416	Malignant cells	Responder vs. Non-responder
TSPAN6	-0.281072	8.47551e-112	2.85743e-107	0.216	0.39	Malignant cells	Responder vs. Non-responder
MBD2	-0.281384	8.58382e-121	2.89395e-116	0.201	0.38	Malignant cells	Responder vs. Non-responder
GSR	-0.281558	1.72478e-129	5.81494e-125	0.139	0.307	Malignant cells	Responder vs. Non-responder
LRRC59	-0.281788	1.34219e-31	4.52505e-27	0.481	0.538	Malignant cells	Responder vs. Non-responder
DUT	-0.283154	8.63302e-14	2.91054e-09	0.556	0.558	Malignant cells	Responder vs. Non-responder
ANXA4	-0.283365	7.19884e-26	2.42702e-21	0.473	0.529	Malignant cells	Responder vs. Non-responder
COA6	-0.283768	5.3044e-98	1.78833e-93	0.346	0.498	Malignant cells	Responder vs. Non-responder
CLTC	-0.28394	1.5028e-27	5.06655e-23	0.492	0.536	Malignant cells	Responder vs. Non-responder
PLPP1	-0.284019	7.88021e-71	2.65673e-66	0.14	0.253	Malignant cells	Responder vs. Non-responder
ANXA7	-0.284708	4.67773e-59	1.57705e-54	0.382	0.505	Malignant cells	Responder vs. Non-responder
SNU13	-0.284767	9.27552e-36	3.12715e-31	0.789	0.706	Malignant cells	Responder vs. Non-responder
TWF1	-0.285033	2.14783e-42	7.24119e-38	0.397	0.48	Malignant cells	Responder vs. Non-responder
TUBA4A	-0.285594	7.72286e-45	2.60368e-40	0.243	0.347	Malignant cells	Responder vs. Non-responder
DNAJC19	-0.285756	4.23262e-47	1.42699e-42	0.528	0.579	Malignant cells	Responder vs. Non-responder
GADD45B	-0.28591	1.55757e-99	5.2512e-95	0.292	0.461	Malignant cells	Responder vs. Non-responder
RNF187	-0.286343	3.6579e-40	1.23322e-35	0.453	0.522	Malignant cells	Responder vs. Non-responder
TGIF1	-0.286403	9.63868e-59	3.24959e-54	0.337	0.45	Malignant cells	Responder vs. Non-responder
TMEM59	-0.286602	1.85534e-45	6.25509e-41	0.665	0.648	Malignant cells	Responder vs. Non-responder
ITGB1	-0.286905	1.74669e-17	5.8888e-13	0.556	0.553	Malignant cells	Responder vs. Non-responder
GPI	-0.287075	4.21188e-20	1.41999e-15	0.563	0.554	Malignant cells	Responder vs. Non-responder
CACYBP	-0.287758	1.80089e-41	6.07154e-37	0.575	0.603	Malignant cells	Responder vs. Non-responder
BCL3	-0.287994	3.16573e-85	1.06729e-80	0.201	0.347	Malignant cells	Responder vs. Non-responder
RNF7	-0.288193	7.48037e-46	2.52193e-41	0.655	0.653	Malignant cells	Responder vs. Non-responder
HSPB11	-0.288313	1.62695e-46	5.48511e-42	0.332	0.444	Malignant cells	Responder vs. Non-responder
DAZAP2	-0.28873	2.59839e-41	8.76022e-37	0.588	0.627	Malignant cells	Responder vs. Non-responder
GBP2	-0.289984	3.21104e-107	1.08257e-102	0.108	0.251	Malignant cells	Responder vs. Non-responder
C8orf33	-0.29104	1.19098e-77	4.01528e-73	0.25	0.388	Malignant cells	Responder vs. Non-responder
NIBAN2	-0.291507	8.49578e-137	2.86427e-132	0.196	0.411	Malignant cells	Responder vs. Non-responder
MCTS1	-0.291842	2.74204e-29	9.24451e-25	0.468	0.521	Malignant cells	Responder vs. Non-responder
MXRA7	-0.292006	2.34904e-94	7.91955e-90	0.204	0.349	Malignant cells	Responder vs. Non-responder
ARL6IP1	-0.292031	1.16735e-57	3.93559e-53	0.505	0.576	Malignant cells	Responder vs. Non-responder
NENF	-0.292559	7.95126e-29	2.68069e-24	0.597	0.596	Malignant cells	Responder vs. Non-responder
GHITM	-0.29258	1.65773e-15	5.58888e-11	0.613	0.59	Malignant cells	Responder vs. Non-responder
PSMB2	-0.293128	8.53761e-49	2.87837e-44	0.601	0.633	Malignant cells	Responder vs. Non-responder
LSM5	-0.293251	6.96613e-16	2.34856e-11	0.659	0.61	Malignant cells	Responder vs. Non-responder
EIF6	-0.293826	1.2121e-48	4.08647e-44	0.587	0.629	Malignant cells	Responder vs. Non-responder
UBALD2	-0.294117	1.48582e-53	5.00929e-49	0.407	0.506	Malignant cells	Responder vs. Non-responder
EIF5	-0.295419	5.79428e-48	1.95348e-43	0.591	0.612	Malignant cells	Responder vs. Non-responder
PSMD12	-0.295649	1.11398e-74	3.75566e-70	0.354	0.483	Malignant cells	Responder vs. Non-responder
CD164	-0.296119	1.61254e-63	5.43652e-59	0.471	0.557	Malignant cells	Responder vs. Non-responder
RIT1	-0.297296	8.54468e-217	2.88075e-212	0.126	0.352	Malignant cells	Responder vs. Non-responder
IRF6	-0.29771	4.43963e-43	1.49678e-38	0.24	0.331	Malignant cells	Responder vs. Non-responder
BHLHE40	-0.298211	5.20712e-180	1.75553e-175	0.216	0.462	Malignant cells	Responder vs. Non-responder
ARF4	-0.298311	8.85407e-85	2.98506e-80	0.503	0.617	Malignant cells	Responder vs. Non-responder
RHOV	-0.298317	4.97804e-30	1.6783e-25	0.251	0.324	Malignant cells	Responder vs. Non-responder
SresponderP	-0.298924	4.82236e-96	1.62581e-91	0.357	0.519	Malignant cells	Responder vs. Non-responder
F11R	-0.299113	1.26359e-55	4.26008e-51	0.469	0.541	Malignant cells	Responder vs. Non-responder
IFI35	-0.299366	5.34665e-94	1.80257e-89	0.206	0.361	Malignant cells	Responder vs. Non-responder
URI1	-0.299476	1.91765e-53	6.46516e-49	0.395	0.495	Malignant cells	Responder vs. Non-responder
ATP5F1C	-0.299794	6.66983e-14	2.24867e-09	0.704	0.65	Malignant cells	Responder vs. Non-responder
RBCK1	-0.29987	2.28482e-33	7.70303e-29	0.568	0.571	Malignant cells	Responder vs. Non-responder
SSR2	-0.299966	3.43546e-12	1.15823e-07	0.797	0.677	Malignant cells	Responder vs. Non-responder
NSFL1C	-0.300086	2.89444e-111	9.75831e-107	0.325	0.499	Malignant cells	Responder vs. Non-responder
HIST1H2BD	-0.30015	7.83153e-32	2.64032e-27	0.253	0.328	Malignant cells	Responder vs. Non-responder
GNB2	-0.300312	6.24296e-57	2.10475e-52	0.618	0.646	Malignant cells	Responder vs. Non-responder
ATOX1	-0.300377	6.5687e-14	2.21457e-09	0.583	0.579	Malignant cells	Responder vs. Non-responder
EIF2S2	-0.300652	5.54423e-36	1.86918e-31	0.688	0.66	Malignant cells	Responder vs. Non-responder
C6orf62	-0.30091	6.33847e-29	2.13695e-24	0.36	0.415	Malignant cells	Responder vs. Non-responder
SCD	-0.301265	1.33972e-31	4.51673e-27	0.283	0.355	Malignant cells	Responder vs. Non-responder
PFDN6	-0.301326	1.96349e-40	6.61972e-36	0.399	0.484	Malignant cells	Responder vs. Non-responder
FDX1	-0.301654	2.85334e-93	9.61975e-89	0.317	0.476	Malignant cells	Responder vs. Non-responder
PHB	-0.301734	1.87535e-15	6.32257e-11	0.681	0.622	Malignant cells	Responder vs. Non-responder
ENSA	-0.301979	3.31094e-23	1.11625e-18	0.704	0.647	Malignant cells	Responder vs. Non-responder
MORF4L2	-0.302225	9.52978e-61	3.21287e-56	0.526	0.604	Malignant cells	Responder vs. Non-responder
PFDN2	-0.302625	2.6526e-40	8.94297e-36	0.652	0.644	Malignant cells	Responder vs. Non-responder
BRI3	-0.302713	6.44439e-27	2.17266e-22	0.72	0.664	Malignant cells	Responder vs. Non-responder
CALCOCO2	-0.303069	5.9119e-150	1.99314e-145	0.257	0.46	Malignant cells	Responder vs. Non-responder
ACTN4	-0.30351	4.96823e-86	1.67499e-81	0.489	0.63	Malignant cells	Responder vs. Non-responder
JTB	-0.303761	2.0887e-44	7.04186e-40	0.775	0.7	Malignant cells	Responder vs. Non-responder
CALU	-0.303827	9.19127e-91	3.09874e-86	0.337	0.495	Malignant cells	Responder vs. Non-responder
C1orf21	-0.304087	9.37383e-242	3.16029e-237	0.073	0.293	Malignant cells	Responder vs. Non-responder
OST4	-0.304291	3.03886e-52	1.02452e-47	0.874	0.798	Malignant cells	Responder vs. Non-responder
SNRPC	-0.304451	4.53418e-35	1.52865e-30	0.591	0.609	Malignant cells	Responder vs. Non-responder
TSPAN1	-0.30461	2.45429e-16	8.2744e-12	0.208	0.275	Malignant cells	Responder vs. Non-responder
MYO6	-0.305066	1.64671e-92	5.55172e-88	0.306	0.463	Malignant cells	Responder vs. Non-responder
MRPL50	-0.30512	3.13786e-78	1.0579e-73	0.27	0.411	Malignant cells	Responder vs. Non-responder
TMED10	-0.305197	1.49797e-53	5.05024e-49	0.607	0.603	Malignant cells	Responder vs. Non-responder
ARPC3	-0.305556	8.87651e-59	2.99263e-54	0.864	0.798	Malignant cells	Responder vs. Non-responder
OSTF1	-0.30565	6.0395e-166	2.03616e-161	0.2	0.413	Malignant cells	Responder vs. Non-responder
CFL1	-0.306039	2.91583e-102	9.83043e-98	0.918	0.857	Malignant cells	Responder vs. Non-responder
EMC2	-0.30666	1.4233e-106	4.79852e-102	0.272	0.447	Malignant cells	Responder vs. Non-responder
H1F0	-0.306694	2.23808e-18	7.54548e-14	0.519	0.556	Malignant cells	Responder vs. Non-responder
IFI16	-0.30677	5.80403e-90	1.95677e-85	0.22	0.372	Malignant cells	Responder vs. Non-responder
SCP2	-0.306808	8.78567e-51	2.962e-46	0.511	0.587	Malignant cells	Responder vs. Non-responder
TMEM98	-0.307965	3.1889e-164	1.07511e-159	0.108	0.293	Malignant cells	Responder vs. Non-responder
TAX1BP1	-0.308044	1.84578e-63	6.22286e-59	0.582	0.648	Malignant cells	Responder vs. Non-responder
TMSB4X	-0.308556	2.63216e-100	8.87406e-96	0.969	0.88	Malignant cells	Responder vs. Non-responder
ELOC	-0.308582	2.05187e-15	6.91769e-11	0.697	0.655	Malignant cells	Responder vs. Non-responder
SRXN1	-0.308807	1.06867e-159	3.60291e-155	0.111	0.289	Malignant cells	Responder vs. Non-responder
COX7B	-0.309688	4.75572e-29	1.60334e-24	0.814	0.731	Malignant cells	Responder vs. Non-responder
EPHX1	-0.309967	1.38185e-156	4.65876e-152	0.19	0.399	Malignant cells	Responder vs. Non-responder
CCND3	-0.310153	1.89202e-27	6.37875e-23	0.329	0.389	Malignant cells	Responder vs. Non-responder
HAX1	-0.310455	2.68965e-43	9.06787e-39	0.547	0.565	Malignant cells	Responder vs. Non-responder
COTL1	-0.310671	4.95659e-60	1.67107e-55	0.147	0.263	Malignant cells	Responder vs. Non-responder
CTSC	-0.310699	1.85729e-104	6.26168e-100	0.353	0.51	Malignant cells	Responder vs. Non-responder
NME1	-0.311092	1.80811e-10	6.09587e-06	0.718	0.649	Malignant cells	Responder vs. Non-responder
ANAPC11	-0.311599	6.69202e-50	2.25615e-45	0.788	0.727	Malignant cells	Responder vs. Non-responder
C19orf33	-0.311725	6.31014e-155	2.1274e-150	0.355	0.658	Malignant cells	Responder vs. Non-responder
NDUFAB1	-0.312141	8.82742e-37	2.97608e-32	0.704	0.659	Malignant cells	Responder vs. Non-responder
MT-ND6	-0.312625	1.42266e-31	4.79636e-27	0.36	0.443	Malignant cells	Responder vs. Non-responder
SUPT16H	-0.312685	7.64769e-130	2.57834e-125	0.29	0.478	Malignant cells	Responder vs. Non-responder
FAM83A	-0.312712	3.97256e-121	1.33931e-116	0.114	0.275	Malignant cells	Responder vs. Non-responder
NET1	-0.312789	1.46529e-38	4.94008e-34	0.363	0.458	Malignant cells	Responder vs. Non-responder
UBE2M	-0.313547	1.13905e-82	3.8402e-78	0.36	0.479	Malignant cells	Responder vs. Non-responder
GCLM	-0.313742	5.87675e-134	1.98129e-129	0.167	0.354	Malignant cells	Responder vs. Non-responder
PRKAR1A	-0.313803	3.63227e-56	1.22458e-51	0.41	0.514	Malignant cells	Responder vs. Non-responder
SYAP1	-0.314044	1.02928e-84	3.47012e-80	0.334	0.469	Malignant cells	Responder vs. Non-responder
ATP5PD	-0.314914	1.14127e-41	3.84768e-37	0.765	0.713	Malignant cells	Responder vs. Non-responder
PLIN3	-0.315129	5.42045e-136	1.82745e-131	0.215	0.412	Malignant cells	Responder vs. Non-responder
GSTA4	-0.315327	1.99843e-102	6.7375e-98	0.134	0.276	Malignant cells	Responder vs. Non-responder
TSC22D3	-0.315569	2.71343e-52	9.14806e-48	0.333	0.442	Malignant cells	Responder vs. Non-responder
PSMB1	-0.315781	1.76458e-37	5.94911e-33	0.74	0.685	Malignant cells	Responder vs. Non-responder
UBE2S	-0.316211	5.82159e-23	1.96269e-18	0.454	0.493	Malignant cells	Responder vs. Non-responder
IMPA2	-0.316675	3.42091e-210	1.15332e-205	0.155	0.386	Malignant cells	Responder vs. Non-responder
PALLD	-0.3168	1.33822e-112	4.51168e-108	0.13	0.278	Malignant cells	Responder vs. Non-responder
NDUFB5	-0.316834	3.8019e-23	1.28177e-18	0.722	0.656	Malignant cells	Responder vs. Non-responder
ATP1A1	-0.317014	3.10465e-86	1.0467e-81	0.471	0.575	Malignant cells	Responder vs. Non-responder
PSMD11	-0.317362	5.18604e-65	1.74842e-60	0.421	0.527	Malignant cells	Responder vs. Non-responder
PSMA4	-0.317383	6.29353e-60	2.1218e-55	0.547	0.615	Malignant cells	Responder vs. Non-responder
UBE2A	-0.317386	1.0615e-112	3.57874e-108	0.34	0.513	Malignant cells	Responder vs. Non-responder
SDHC	-0.317755	7.70771e-63	2.59858e-58	0.55	0.607	Malignant cells	Responder vs. Non-responder
COPA	-0.317891	2.5882e-142	8.72586e-138	0.311	0.508	Malignant cells	Responder vs. Non-responder
SLC39A1	-0.319419	3.3076e-99	1.11512e-94	0.362	0.489	Malignant cells	Responder vs. Non-responder
RPA3	-0.319558	5.31971e-49	1.79349e-44	0.469	0.556	Malignant cells	Responder vs. Non-responder
VAPA	-0.319797	1.18356e-59	3.99027e-55	0.619	0.641	Malignant cells	Responder vs. Non-responder
POLR2H	-0.319866	2.90769e-72	9.80299e-68	0.517	0.597	Malignant cells	Responder vs. Non-responder
CXCL17	-0.320001	3.00401e-60	1.01277e-55	0.174	0.298	Malignant cells	Responder vs. Non-responder
AZIN1	-0.320706	3.08843e-74	1.04123e-69	0.35	0.476	Malignant cells	Responder vs. Non-responder
CMBL	-0.32085	1.17235e-29	3.95247e-25	0.272	0.337	Malignant cells	Responder vs. Non-responder
GALNT2	-0.321238	3.116e-263	1.05053e-258	0.143	0.397	Malignant cells	Responder vs. Non-responder
HPRT1	-0.321707	2.29022e-76	7.72125e-72	0.306	0.437	Malignant cells	Responder vs. Non-responder
DNAJC15	-0.322001	4.73846e-261	1.59752e-256	0.22	0.529	Malignant cells	Responder vs. Non-responder
ACTL6A	-0.322254	3.1071e-110	1.04753e-105	0.293	0.474	Malignant cells	Responder vs. Non-responder
MPC2	-0.322513	2.32969e-44	7.85432e-40	0.601	0.619	Malignant cells	Responder vs. Non-responder
ERRFI1	-0.3227	3.62515e-105	1.22218e-100	0.263	0.444	Malignant cells	Responder vs. Non-responder
TFRC	-0.322738	6.93462e-126	2.33794e-121	0.226	0.397	Malignant cells	Responder vs. Non-responder
CHMP1B	-0.322771	1.67778e-66	5.65647e-62	0.356	0.471	Malignant cells	Responder vs. Non-responder
ZFP36L1	-0.323189	2.71186e-123	9.14276e-119	0.519	0.66	Malignant cells	Responder vs. Non-responder
HNRNPU	-0.323622	9.37885e-58	3.16199e-53	0.727	0.695	Malignant cells	Responder vs. Non-responder
CBX3	-0.32372	4.4698e-68	1.50695e-63	0.57	0.623	Malignant cells	Responder vs. Non-responder
WARS	-0.324101	4.60894e-53	1.55386e-48	0.24	0.361	Malignant cells	Responder vs. Non-responder
PRKDC	-0.324379	3.67158e-88	1.23784e-83	0.347	0.492	Malignant cells	Responder vs. Non-responder
DNPH1	-0.324502	8.20606e-22	2.76659e-17	0.619	0.59	Malignant cells	Responder vs. Non-responder
ITPKC	-0.324864	6.88539e-53	2.32134e-48	0.216	0.332	Malignant cells	Responder vs. Non-responder
EID1	-0.325627	4.85067e-48	1.63536e-43	0.589	0.615	Malignant cells	Responder vs. Non-responder
NSD3	-0.32628	1.11405e-42	3.75589e-38	0.417	0.502	Malignant cells	Responder vs. Non-responder
PRDX3	-0.326437	3.94673e-75	1.3306e-70	0.474	0.564	Malignant cells	Responder vs. Non-responder
GOLM1	-0.328334	1.82782e-157	6.16233e-153	0.273	0.499	Malignant cells	Responder vs. Non-responder
LPIN2	-0.328819	2.33872e-76	7.88475e-72	0.22	0.373	Malignant cells	Responder vs. Non-responder
SRP9	-0.328853	7.52128e-86	2.53572e-81	0.636	0.676	Malignant cells	Responder vs. Non-responder
RAB18	-0.329401	2.36162e-90	7.96196e-86	0.351	0.504	Malignant cells	Responder vs. Non-responder
USP14	-0.32993	2.51048e-75	8.46384e-71	0.288	0.424	Malignant cells	Responder vs. Non-responder
TUSC3	-0.330236	5.46688e-254	1.8431e-249	0.114	0.371	Malignant cells	Responder vs. Non-responder
UBA1	-0.33077	2.62582e-73	8.8527e-69	0.289	0.442	Malignant cells	Responder vs. Non-responder
CKS1B	-0.331442	1.11535e-41	3.76028e-37	0.445	0.527	Malignant cells	Responder vs. Non-responder
SPCS2	-0.33251	1.24103e-87	4.184e-83	0.522	0.608	Malignant cells	Responder vs. Non-responder
SKIL	-0.332535	5.69079e-121	1.91859e-116	0.184	0.36	Malignant cells	Responder vs. Non-responder
RPS27	-0.332912	2.78427e-68	9.3869e-64	0.967	0.975	Malignant cells	Responder vs. Non-responder
YWHAB	-0.333	4.80182e-96	1.61888e-91	0.671	0.699	Malignant cells	Responder vs. Non-responder
MX1	-0.333328	4.58746e-104	1.54662e-99	0.19	0.358	Malignant cells	Responder vs. Non-responder
EGFR	-0.335142	1.36996e-190	4.61868e-186	0.146	0.366	Malignant cells	Responder vs. Non-responder
PCBP1	-0.335354	1.99699e-72	6.73267e-68	0.693	0.705	Malignant cells	Responder vs. Non-responder
DDX5	-0.335966	5.68755e-66	1.9175e-61	0.831	0.749	Malignant cells	Responder vs. Non-responder
ANXA11	-0.337656	5.19014e-131	1.7498e-126	0.444	0.621	Malignant cells	Responder vs. Non-responder
GSTP1	-0.337882	5.26149e-97	1.77386e-92	0.951	0.919	Malignant cells	Responder vs. Non-responder
ADAM9	-0.338089	3.88264e-112	1.30899e-107	0.194	0.364	Malignant cells	Responder vs. Non-responder
CCT3	-0.338378	4.40253e-25	1.48427e-20	0.743	0.689	Malignant cells	Responder vs. Non-responder
TOB1	-0.339597	7.22351e-21	2.43533e-16	0.471	0.495	Malignant cells	Responder vs. Non-responder
NAA20	-0.34012	3.8333e-65	1.29236e-60	0.502	0.57	Malignant cells	Responder vs. Non-responder
PUF60	-0.340219	1.34792e-101	4.54439e-97	0.437	0.576	Malignant cells	Responder vs. Non-responder
KRT7	-0.34086	7.20567e-119	2.42932e-114	0.319	0.542	Malignant cells	Responder vs. Non-responder
MZT2B	-0.341589	1.21078e-58	4.08203e-54	0.776	0.723	Malignant cells	Responder vs. Non-responder
PSMC1	-0.341626	2.48239e-84	8.36912e-80	0.395	0.522	Malignant cells	Responder vs. Non-responder
GLO1	-0.341657	1.94492e-59	6.55709e-55	0.453	0.546	Malignant cells	Responder vs. Non-responder
NDUFA5	-0.341805	3.01714e-63	1.0172e-58	0.491	0.567	Malignant cells	Responder vs. Non-responder
HLA-C	-0.342367	2.99085e-105	1.00834e-100	0.781	0.774	Malignant cells	Responder vs. Non-responder
SMIM26	-0.342584	1.37938e-52	4.65043e-48	0.655	0.633	Malignant cells	Responder vs. Non-responder
WDR66	-0.343091	3.93625e-257	1.32707e-252	0.08	0.313	Malignant cells	Responder vs. Non-responder
RHOF	-0.344162	5.09595e-106	1.71805e-101	0.141	0.291	Malignant cells	Responder vs. Non-responder
UBE2V2	-0.344708	1.51282e-108	5.10032e-104	0.36	0.514	Malignant cells	Responder vs. Non-responder
DYNLRB1	-0.344905	2.16399e-34	7.29566e-30	0.531	0.542	Malignant cells	Responder vs. Non-responder
HSPB1	-0.345758	1.17682e-34	3.96754e-30	0.872	0.806	Malignant cells	Responder vs. Non-responder
IER3IP1	-0.34579	1.51408e-79	5.10455e-75	0.448	0.543	Malignant cells	Responder vs. Non-responder
PAK2	-0.347049	1.44755e-120	4.88027e-116	0.358	0.537	Malignant cells	Responder vs. Non-responder
DNAJB1	-0.347609	1.51038e-89	5.09209e-85	0.497	0.631	Malignant cells	Responder vs. Non-responder
B2M	-0.3486	5.55042e-17	1.87127e-12	0.964	0.919	Malignant cells	Responder vs. Non-responder
DPM3	-0.349183	2.50909e-105	8.45913e-101	0.328	0.483	Malignant cells	Responder vs. Non-responder
NANS	-0.349532	7.93712e-34	2.67592e-29	0.407	0.476	Malignant cells	Responder vs. Non-responder
UPP1	-0.350852	3.94793e-158	1.33101e-153	0.18	0.382	Malignant cells	Responder vs. Non-responder
SNX6	-0.351269	8.59275e-134	2.89696e-129	0.363	0.555	Malignant cells	Responder vs. Non-responder
TOMM6	-0.352974	5.77341e-37	1.94645e-32	0.835	0.75	Malignant cells	Responder vs. Non-responder
NDUFB9	-0.353515	1.51915e-15	5.12167e-11	0.783	0.682	Malignant cells	Responder vs. Non-responder
EIF4G1	-0.353535	5.65805e-74	1.90755e-69	0.434	0.546	Malignant cells	Responder vs. Non-responder
LSR	-0.354171	1.66229e-16	5.60423e-12	0.504	0.549	Malignant cells	Responder vs. Non-responder
TPM4	-0.354467	1.61818e-53	5.45552e-49	0.436	0.531	Malignant cells	Responder vs. Non-responder
FKBP3	-0.355396	3.45008e-60	1.16316e-55	0.389	0.497	Malignant cells	Responder vs. Non-responder
ABHD17C	-0.355607	5.47179e-160	1.84476e-155	0.144	0.334	Malignant cells	Responder vs. Non-responder
CERS2	-0.357327	3.8822e-181	1.30884e-176	0.274	0.485	Malignant cells	Responder vs. Non-responder
TMEM14B	-0.357334	1.90388e-40	6.41873e-36	0.618	0.613	Malignant cells	Responder vs. Non-responder
UBL5	-0.35755	3.18542e-81	1.07393e-76	0.824	0.765	Malignant cells	Responder vs. Non-responder
CST3	-0.358471	3.78567e-37	1.2763e-32	0.79	0.679	Malignant cells	Responder vs. Non-responder
HSP90AB1	-0.359615	5.64669e-172	1.90373e-167	0.946	0.898	Malignant cells	Responder vs. Non-responder
ISG20	-0.359897	6.42589e-15	2.16642e-10	0.358	0.396	Malignant cells	Responder vs. Non-responder
ZFP36L2	-0.360349	2.89053e-44	9.74515e-40	0.46	0.528	Malignant cells	Responder vs. Non-responder
MRPL52	-0.360647	1.34319e-71	4.52843e-67	0.601	0.626	Malignant cells	Responder vs. Non-responder
CNIH4	-0.360849	9.27437e-53	3.12676e-48	0.555	0.589	Malignant cells	Responder vs. Non-responder
TSPO	-0.361145	5.94382e-80	2.0039e-75	0.714	0.706	Malignant cells	Responder vs. Non-responder
IER5L	-0.361998	2.87951e-200	9.70797e-196	0.125	0.336	Malignant cells	Responder vs. Non-responder
PABPC1	-0.362008	4.2607e-68	1.43645e-63	0.918	0.871	Malignant cells	Responder vs. Non-responder
MAPK1IP1L	-0.362209	4.82204e-127	1.6257e-122	0.332	0.503	Malignant cells	Responder vs. Non-responder
MRPS21	-0.362861	1.6051e-61	5.41144e-57	0.753	0.699	Malignant cells	Responder vs. Non-responder
CHMP4B	-0.36339	1.8518e-83	6.24317e-79	0.466	0.582	Malignant cells	Responder vs. Non-responder
PMF1	-0.364379	1.32991e-115	4.48365e-111	0.316	0.483	Malignant cells	Responder vs. Non-responder
KRT10	-0.364491	1.43131e-34	4.82551e-30	0.713	0.672	Malignant cells	Responder vs. Non-responder
PTP4A2	-0.366332	2.7962e-72	9.4271e-68	0.54	0.605	Malignant cells	Responder vs. Non-responder
SLC6A8	-0.366363	1.38854e-37	4.68133e-33	0.252	0.34	Malignant cells	Responder vs. Non-responder
SERF2	-0.367253	4.52504e-275	1.52557e-270	0.934	0.921	Malignant cells	Responder vs. Non-responder
ZFP36	-0.367996	5.27137e-22	1.77719e-17	0.735	0.69	Malignant cells	Responder vs. Non-responder
FASN	-0.369051	3.98391e-08	0.00134314	0.334	0.357	Malignant cells	Responder vs. Non-responder
AP2M1	-0.369261	1.4897e-69	5.02237e-65	0.611	0.652	Malignant cells	Responder vs. Non-responder
CYTOR	-0.369461	1.31602e-151	4.43684e-147	0.218	0.419	Malignant cells	Responder vs. Non-responder
WDR45B	-0.369708	1.56084e-89	5.2622e-85	0.396	0.524	Malignant cells	Responder vs. Non-responder
NDUFA3	-0.36973	4.77442e-59	1.60965e-54	0.559	0.6	Malignant cells	Responder vs. Non-responder
DCXR	-0.370311	3.79919e-28	1.28086e-23	0.555	0.566	Malignant cells	Responder vs. Non-responder
NDUFB1	-0.3716	1.61665e-27	5.45039e-23	0.595	0.584	Malignant cells	Responder vs. Non-responder
XRCC6	-0.371689	4.78565e-83	1.61343e-78	0.569	0.634	Malignant cells	Responder vs. Non-responder
CMPK1	-0.372556	3.83728e-101	1.2937e-96	0.394	0.537	Malignant cells	Responder vs. Non-responder
MRPL47	-0.373332	1.43322e-117	4.83195e-113	0.387	0.551	Malignant cells	Responder vs. Non-responder
SQSTM1	-0.37368	1.95042e-46	6.57564e-42	0.722	0.703	Malignant cells	Responder vs. Non-responder
SF3B4	-0.373823	2.9149e-230	9.82728e-226	0.282	0.54	Malignant cells	Responder vs. Non-responder
IDS	-0.374294	9.5583e-99	3.22248e-94	0.343	0.51	Malignant cells	Responder vs. Non-responder
NME4	-0.374504	1.20679e-64	4.06858e-60	0.421	0.519	Malignant cells	Responder vs. Non-responder
SMIM14	-0.375303	1.1537e-141	3.88959e-137	0.273	0.474	Malignant cells	Responder vs. Non-responder
SEC62	-0.375341	1.15185e-94	3.88336e-90	0.558	0.628	Malignant cells	Responder vs. Non-responder
FAM49B	-0.376113	1.39401e-122	4.69978e-118	0.334	0.504	Malignant cells	Responder vs. Non-responder
MT1X	-0.376376	1.04414e-79	3.52023e-75	0.231	0.378	Malignant cells	Responder vs. Non-responder
HDGF	-0.378462	9.84182e-147	3.31807e-142	0.434	0.598	Malignant cells	Responder vs. Non-responder
ALDH2	-0.378494	5.79098e-111	1.95237e-106	0.306	0.471	Malignant cells	Responder vs. Non-responder
LACTB2	-0.378916	2.04883e-99	6.90744e-95	0.228	0.391	Malignant cells	Responder vs. Non-responder
RND3	-0.378952	7.50035e-54	2.52867e-49	0.299	0.417	Malignant cells	Responder vs. Non-responder
SEPTIN7	-0.379166	2.06563e-117	6.96406e-113	0.439	0.594	Malignant cells	Responder vs. Non-responder
CD81	-0.38001	4.81165e-152	1.6222e-147	0.403	0.581	Malignant cells	Responder vs. Non-responder
SFTA3	-0.380228	1.21749e-21	4.10464e-17	0.217	0.269	Malignant cells	Responder vs. Non-responder
ADAR	-0.380262	4.1809e-119	1.40955e-114	0.407	0.557	Malignant cells	Responder vs. Non-responder
LAGE3	-0.380694	1.75787e-57	5.92648e-53	0.488	0.557	Malignant cells	Responder vs. Non-responder
HNRNPL	-0.380724	3.69971e-106	1.24732e-101	0.327	0.497	Malignant cells	Responder vs. Non-responder
CAPZA2	-0.381734	6.51882e-158	2.19775e-153	0.379	0.57	Malignant cells	Responder vs. Non-responder
SPRR2A	-0.382751	2.51655e-234	8.48429e-230	0.257	0.042	Malignant cells	Responder vs. Non-responder
DDT	-0.382848	7.39119e-58	2.49187e-53	0.747	0.679	Malignant cells	Responder vs. Non-responder
MAL2	-0.383326	9.02036e-147	3.04112e-142	0.375	0.566	Malignant cells	Responder vs. Non-responder
PRNP	-0.383447	1.60386e-78	5.40726e-74	0.214	0.347	Malignant cells	Responder vs. Non-responder
MT-CYB	-0.383937	3.97881e-13	1.34142e-08	0.876	0.783	Malignant cells	Responder vs. Non-responder
ARF1	-0.384958	2.30596e-142	7.77432e-138	0.713	0.745	Malignant cells	Responder vs. Non-responder
ARPC5L	-0.385069	3.0313e-104	1.02197e-99	0.455	0.578	Malignant cells	Responder vs. Non-responder
RAMP1	-0.386432	6.90209e-171	2.32697e-166	0.105	0.299	Malignant cells	Responder vs. Non-responder
PSMD4	-0.386726	3.86869e-107	1.30429e-102	0.589	0.652	Malignant cells	Responder vs. Non-responder
PGAM1	-0.386786	1.18602e-49	3.99854e-45	0.56	0.602	Malignant cells	Responder vs. Non-responder
POLR2L	-0.387416	1.06404e-87	3.58731e-83	0.756	0.728	Malignant cells	Responder vs. Non-responder
ASPH	-0.38759	3.5772e-269	1.20602e-264	0.146	0.442	Malignant cells	Responder vs. Non-responder
C14orf119	-0.388082	8.60414e-180	2.9008e-175	0.277	0.497	Malignant cells	Responder vs. Non-responder
CCT5	-0.388225	2.46786e-78	8.32016e-74	0.584	0.641	Malignant cells	Responder vs. Non-responder
SMS	-0.388922	1.07481e-79	3.62362e-75	0.458	0.566	Malignant cells	Responder vs. Non-responder
S100A14	-0.389188	5.88868e-179	1.98531e-174	0.283	0.527	Malignant cells	Responder vs. Non-responder
PSMA7	-0.390143	7.33799e-76	2.47393e-71	0.811	0.76	Malignant cells	Responder vs. Non-responder
CHURC1	-0.390288	4.12632e-105	1.39115e-100	0.519	0.592	Malignant cells	Responder vs. Non-responder
ASS1	-0.390299	6.96046e-93	2.34665e-88	0.177	0.32	Malignant cells	Responder vs. Non-responder
HILPDA	-0.39046	2.07221e-38	6.98625e-34	0.196	0.294	Malignant cells	Responder vs. Non-responder
TMEM141	-0.390486	4.54434e-31	1.53208e-26	0.519	0.532	Malignant cells	Responder vs. Non-responder
EIF5A	-0.391761	2.00454e-169	6.75811e-165	0.458	0.637	Malignant cells	Responder vs. Non-responder
JUNB	-0.392975	5.84069e-57	1.96913e-52	0.771	0.715	Malignant cells	Responder vs. Non-responder
MRPL13	-0.393056	8.69753e-95	2.93228e-90	0.375	0.519	Malignant cells	Responder vs. Non-responder
PFN1	-0.396293	1.40034e-129	4.72112e-125	0.9	0.841	Malignant cells	Responder vs. Non-responder
UBE2H	-0.396314	1.11011e-180	3.74261e-176	0.291	0.517	Malignant cells	Responder vs. Non-responder
LMNA	-0.396602	3.27093e-107	1.10276e-102	0.688	0.721	Malignant cells	Responder vs. Non-responder
HIST1H4H	-0.396843	1.66425e-148	5.61084e-144	0.119	0.297	Malignant cells	Responder vs. Non-responder
FXR1	-0.398349	5.96302e-27	2.01037e-22	0.571	0.575	Malignant cells	Responder vs. Non-responder
RBX1	-0.398928	1.64033e-101	5.5302e-97	0.643	0.681	Malignant cells	Responder vs. Non-responder
ILF2	-0.398993	7.99506e-120	2.69545e-115	0.552	0.643	Malignant cells	Responder vs. Non-responder
H2AFV	-0.39905	4.00072e-119	1.3488e-114	0.53	0.652	Malignant cells	Responder vs. Non-responder
NDUFB11	-0.399559	4.42488e-21	1.4918e-16	0.799	0.727	Malignant cells	Responder vs. Non-responder
CEBPD	-0.399798	4.04929e-117	1.36518e-112	0.565	0.664	Malignant cells	Responder vs. Non-responder
BZW1	-0.401141	5.02888e-110	1.69544e-105	0.419	0.569	Malignant cells	Responder vs. Non-responder
KRT15	-0.401693	2.0439e-110	6.8908e-106	0.185	0.356	Malignant cells	Responder vs. Non-responder
SUMO2	-0.402275	4.95093e-130	1.66916e-125	0.885	0.836	Malignant cells	Responder vs. Non-responder
CARHSP1	-0.403172	1.99052e-120	6.71084e-116	0.313	0.493	Malignant cells	Responder vs. Non-responder
CDC42	-0.403999	1.30321e-156	4.39365e-152	0.593	0.702	Malignant cells	Responder vs. Non-responder
ARPC5	-0.406541	2.79323e-130	9.41711e-126	0.493	0.639	Malignant cells	Responder vs. Non-responder
TDP2	-0.407795	4.19076e-142	1.41287e-137	0.172	0.352	Malignant cells	Responder vs. Non-responder
MRPL14	-0.408215	7.46551e-26	2.51692e-21	0.687	0.647	Malignant cells	Responder vs. Non-responder
UBE2L3	-0.408915	4.50309e-104	1.51817e-99	0.565	0.634	Malignant cells	Responder vs. Non-responder
CCT6A	-0.410545	1.48353e-52	5.00157e-48	0.657	0.645	Malignant cells	Responder vs. Non-responder
C12orf75	-0.410868	6.86192e-204	2.31343e-199	0.083	0.291	Malignant cells	Responder vs. Non-responder
TNFRSF12A	-0.411229	4.85975e-54	1.63842e-49	0.391	0.47	Malignant cells	Responder vs. Non-responder
TUBB4B	-0.411256	1.37316e-48	4.62946e-44	0.662	0.679	Malignant cells	Responder vs. Non-responder
NDUFV2	-0.412274	1.1753e-78	3.9624e-74	0.642	0.645	Malignant cells	Responder vs. Non-responder
UQCR10	-0.412378	3.24067e-140	1.09256e-135	0.84	0.802	Malignant cells	Responder vs. Non-responder
RNASET2	-0.416128	9.1157e-13	3.07327e-08	0.578	0.457	Malignant cells	Responder vs. Non-responder
PSMA6	-0.416398	7.31375e-91	2.46576e-86	0.681	0.71	Malignant cells	Responder vs. Non-responder
LY6E	-0.418629	8.10247e-36	2.73167e-31	0.863	0.755	Malignant cells	Responder vs. Non-responder
THOC3	-0.420719	5.56792e-150	1.87717e-145	0.211	0.4	Malignant cells	Responder vs. Non-responder
SNRPG	-0.420728	5.22801e-117	1.76257e-112	0.721	0.73	Malignant cells	Responder vs. Non-responder
COX16	-0.421581	7.3825e-91	2.48894e-86	0.521	0.587	Malignant cells	Responder vs. Non-responder
TMBIM6	-0.421666	4.80655e-113	1.62048e-108	0.802	0.73	Malignant cells	Responder vs. Non-responder
ATP5MF	-0.422574	2.57324e-154	8.67542e-150	0.759	0.76	Malignant cells	Responder vs. Non-responder
PSME1	-0.422979	8.62385e-47	2.90744e-42	0.706	0.677	Malignant cells	Responder vs. Non-responder
FDPS	-0.424189	2.28635e-89	7.7082e-85	0.458	0.559	Malignant cells	Responder vs. Non-responder
CAPNS1	-0.424537	1.03846e-48	3.50105e-44	0.509	0.579	Malignant cells	Responder vs. Non-responder
MCM3	-0.424688	4.25474e-143	1.43444e-138	0.192	0.379	Malignant cells	Responder vs. Non-responder
SLC39A4	-0.424718	2.43825e-131	8.22033e-127	0.343	0.504	Malignant cells	Responder vs. Non-responder
TSC22D1	-0.425804	6.04116e-133	2.03672e-128	0.372	0.535	Malignant cells	Responder vs. Non-responder
COA3	-0.426002	5.3686e-73	1.80997e-68	0.523	0.593	Malignant cells	Responder vs. Non-responder
DUSP1	-0.426443	1.29318e-38	4.35984e-34	0.645	0.628	Malignant cells	Responder vs. Non-responder
POMP	-0.426587	3.6008e-68	1.21397e-63	0.731	0.691	Malignant cells	Responder vs. Non-responder
HMGB1	-0.426857	1.11768e-115	3.76816e-111	0.843	0.805	Malignant cells	Responder vs. Non-responder
SSBP1	-0.427161	2.03617e-77	6.86474e-73	0.679	0.674	Malignant cells	Responder vs. Non-responder
APH1A	-0.42791	4.46932e-104	1.50679e-99	0.489	0.581	Malignant cells	Responder vs. Non-responder
KLF5	-0.428404	1.76916e-191	5.96455e-187	0.283	0.54	Malignant cells	Responder vs. Non-responder
ATP5F1E	-0.429075	1.38943e-90	4.68431e-86	0.912	0.885	Malignant cells	Responder vs. Non-responder
GUK1	-0.429111	7.70435e-89	2.59744e-84	0.821	0.759	Malignant cells	Responder vs. Non-responder
PSMB9	-0.429607	8.3308e-49	2.80865e-44	0.4	0.486	Malignant cells	Responder vs. Non-responder
MT-CO1	-0.430107	2.34802e-28	7.91612e-24	0.906	0.851	Malignant cells	Responder vs. Non-responder
PCNA	-0.432503	2.29667e-146	7.743e-142	0.229	0.433	Malignant cells	Responder vs. Non-responder
SQOR	-0.432546	4.66463e-143	1.57263e-138	0.196	0.383	Malignant cells	Responder vs. Non-responder
SELENBP1	-0.435521	5.48363e-110	1.84875e-105	0.136	0.283	Malignant cells	Responder vs. Non-responder
MT-ATP8	-0.43618	1.75934e-257	5.93144e-253	0.15	0.418	Malignant cells	Responder vs. Non-responder
ANP32E	-0.437204	7.04133e-181	2.37391e-176	0.25	0.464	Malignant cells	Responder vs. Non-responder
TXN	-0.437626	2.18676e-93	7.37245e-89	0.892	0.847	Malignant cells	Responder vs. Non-responder
GGCT	-0.438796	1.8941e-49	6.38577e-45	0.532	0.563	Malignant cells	Responder vs. Non-responder
TMEM230	-0.441133	3.47764e-167	1.17245e-162	0.484	0.615	Malignant cells	Responder vs. Non-responder
NDUFA1	-0.441139	2.46507e-133	8.31072e-129	0.744	0.73	Malignant cells	Responder vs. Non-responder
RHEB	-0.444038	8.62128e-102	2.90658e-97	0.623	0.663	Malignant cells	Responder vs. Non-responder
ANXA3	-0.44421	1.29665e-104	4.37153e-100	0.159	0.313	Malignant cells	Responder vs. Non-responder
ENO1	-0.445325	1.21053e-122	4.08118e-118	0.85	0.826	Malignant cells	Responder vs. Non-responder
FIS1	-0.445328	1.33998e-131	4.51762e-127	0.585	0.648	Malignant cells	Responder vs. Non-responder
TMEM14A	-0.445697	5.0745e-79	1.71082e-74	0.401	0.506	Malignant cells	Responder vs. Non-responder
EZR	-0.445957	3.9375e-130	1.32749e-125	0.536	0.675	Malignant cells	Responder vs. Non-responder
LRP10	-0.446744	1.63086e-223	5.49829e-219	0.309	0.542	Malignant cells	Responder vs. Non-responder
HNRNPA2B1	-0.447138	1.34366e-144	4.53003e-140	0.825	0.796	Malignant cells	Responder vs. Non-responder
STMP1	-0.447274	1.8792e-159	6.33553e-155	0.443	0.597	Malignant cells	Responder vs. Non-responder
TPM1	-0.447707	7.60624e-148	2.56437e-143	0.32	0.535	Malignant cells	Responder vs. Non-responder
FAM107B	-0.4482	1.8854e-184	6.35643e-180	0.232	0.445	Malignant cells	Responder vs. Non-responder
ACTR3	-0.448212	1.29944e-142	4.38094e-138	0.433	0.598	Malignant cells	Responder vs. Non-responder
DST	-0.44861	1.14091e-19	3.84647e-15	0.466	0.359	Malignant cells	Responder vs. Non-responder
YWHAH	-0.448761	3.54434e-175	1.19494e-170	0.393	0.592	Malignant cells	Responder vs. Non-responder
GPR160	-0.448925	1.37877e-145	4.64837e-141	0.145	0.316	Malignant cells	Responder vs. Non-responder
TMCO1	-0.449623	2.59951e-122	8.764e-118	0.477	0.576	Malignant cells	Responder vs. Non-responder
SIVA1	-0.450563	5.40653e-89	1.82276e-84	0.58	0.622	Malignant cells	Responder vs. Non-responder
MAP3K13	-0.451737	2.32131e-118	7.82607e-114	0.47	0.6	Malignant cells	Responder vs. Non-responder
MT-ND3	-0.452609	5.60368e-23	1.88923e-18	0.837	0.723	Malignant cells	Responder vs. Non-responder
PPIA	-0.454045	1.05574e-151	3.55932e-147	0.937	0.891	Malignant cells	Responder vs. Non-responder
RDH10	-0.455201	2.81838e-205	9.5019e-201	0.09	0.293	Malignant cells	Responder vs. Non-responder
SNRPB	-0.455739	1.3356e-105	4.50284e-101	0.708	0.71	Malignant cells	Responder vs. Non-responder
PSMD2	-0.456167	5.04605e-166	1.70123e-161	0.395	0.595	Malignant cells	Responder vs. Non-responder
FAM3C	-0.457622	9.70077e-187	3.27052e-182	0.299	0.524	Malignant cells	Responder vs. Non-responder
VIM	-0.46101	2.07887e-39	7.0087e-35	0.175	0.265	Malignant cells	Responder vs. Non-responder
NDUFB2	-0.464843	5.83356e-145	1.96673e-140	0.763	0.751	Malignant cells	Responder vs. Non-responder
HLA-B	-0.465329	1.77063e-34	5.9695e-30	0.828	0.759	Malignant cells	Responder vs. Non-responder
FTH1	-0.465789	2.71365e-83	9.1488e-79	0.984	0.977	Malignant cells	Responder vs. Non-responder
SNRPB2	-0.466549	5.24134e-157	1.76707e-152	0.444	0.587	Malignant cells	Responder vs. Non-responder
CLDN3	-0.466785	8.45082e-53	2.84911e-48	0.344	0.456	Malignant cells	Responder vs. Non-responder
CETN2	-0.466964	1.22977e-68	4.14605e-64	0.33	0.466	Malignant cells	Responder vs. Non-responder
EIF4A3	-0.473183	4.25728e-146	1.4353e-141	0.366	0.527	Malignant cells	Responder vs. Non-responder
CLU	-0.473522	5.89859e-143	1.98865e-138	0.09	0.254	Malignant cells	Responder vs. Non-responder
CLIC1	-0.473625	1.14013e-179	3.84382e-175	0.81	0.803	Malignant cells	Responder vs. Non-responder
MCL1	-0.474876	7.42268e-79	2.50248e-74	0.617	0.639	Malignant cells	Responder vs. Non-responder
CALM1	-0.476312	8.58939e-145	2.89583e-140	0.704	0.754	Malignant cells	Responder vs. Non-responder
FKBP1A	-0.476315	2.13359e-70	7.19319e-66	0.764	0.721	Malignant cells	Responder vs. Non-responder
UBC	-0.476657	8.35299e-237	2.81613e-232	0.925	0.9	Malignant cells	Responder vs. Non-responder
BCAP31	-0.479687	4.61848e-137	1.55707e-132	0.619	0.643	Malignant cells	Responder vs. Non-responder
ARF5	-0.479928	1.37565e-218	4.63788e-214	0.354	0.613	Malignant cells	Responder vs. Non-responder
TPM3	-0.480365	3.69907e-200	1.24711e-195	0.592	0.723	Malignant cells	Responder vs. Non-responder
PSMB5	-0.480831	2.22495e-121	7.50121e-117	0.68	0.68	Malignant cells	Responder vs. Non-responder
GABARAPL1	-0.481561	4.6841e-116	1.5792e-111	0.234	0.382	Malignant cells	Responder vs. Non-responder
ALYREF	-0.484018	1.04499e-176	3.52308e-172	0.222	0.429	Malignant cells	Responder vs. Non-responder
ANXA5	-0.485292	5.46095e-174	1.8411e-169	0.317	0.55	Malignant cells	Responder vs. Non-responder
NEDD8	-0.486128	6.34822e-95	2.14024e-90	0.758	0.718	Malignant cells	Responder vs. Non-responder
TIMM17B	-0.486771	1.46275e-10	4.93152e-06	0.474	0.511	Malignant cells	Responder vs. Non-responder
HSPA1B	-0.487021	1.22638e-250	4.13462e-246	0.293	0.578	Malignant cells	Responder vs. Non-responder
PKM	-0.487784	5.14344e-108	1.73406e-103	0.777	0.75	Malignant cells	Responder vs. Non-responder
HES1	-0.487907	7.00062e-47	2.36019e-42	0.45	0.509	Malignant cells	Responder vs. Non-responder
CITED4	-0.488591	1.8375e-113	6.19493e-109	0.172	0.328	Malignant cells	Responder vs. Non-responder
PPDPF	-0.489678	9.01415e-29	3.03903e-24	0.88	0.797	Malignant cells	Responder vs. Non-responder
NUCKS1	-0.490803	1.22515e-136	4.13047e-132	0.651	0.7	Malignant cells	Responder vs. Non-responder
MGST3	-0.492836	5.31715e-103	1.79262e-98	0.513	0.614	Malignant cells	Responder vs. Non-responder
ARPC1B	-0.492883	1.82226e-126	6.14356e-122	0.655	0.709	Malignant cells	Responder vs. Non-responder
HNRNPK	-0.493209	1.49298e-202	5.03343e-198	0.7	0.75	Malignant cells	Responder vs. Non-responder
PSMA3	-0.49338	1.27177e-88	4.28766e-84	0.555	0.609	Malignant cells	Responder vs. Non-responder
ENY2	-0.494649	2.20318e-115	7.42779e-111	0.594	0.653	Malignant cells	Responder vs. Non-responder
DYNLT1	-0.496335	2.8385e-194	9.56973e-190	0.467	0.652	Malignant cells	Responder vs. Non-responder
MT-CO2	-0.496906	1.6785e-32	5.6589e-28	0.905	0.846	Malignant cells	Responder vs. Non-responder
RBM8A	-0.497008	1.01728e-170	3.42967e-166	0.654	0.694	Malignant cells	Responder vs. Non-responder
BLVRB	-0.497805	3.94834e-128	1.33114e-123	0.492	0.619	Malignant cells	Responder vs. Non-responder
PGRMC1	-0.50254	3.48485e-221	1.17488e-216	0.344	0.553	Malignant cells	Responder vs. Non-responder
RPL22L1	-0.50444	8.45905e-34	2.85188e-29	0.656	0.626	Malignant cells	Responder vs. Non-responder
DEK	-0.509829	7.60952e-107	2.56547e-102	0.546	0.645	Malignant cells	Responder vs. Non-responder
HEBP2	-0.512139	2.03165e-138	6.8495e-134	0.458	0.596	Malignant cells	Responder vs. Non-responder
PFKP	-0.514516	1.73581e-111	5.8521e-107	0.286	0.429	Malignant cells	Responder vs. Non-responder
MYL6	-0.516217	1.22352e-303	4.12496e-299	0.922	0.908	Malignant cells	Responder vs. Non-responder
BEX3	-0.516863	3.2062e-16	1.08094e-11	0.634	0.557	Malignant cells	Responder vs. Non-responder
SCPEP1	-0.51973	8.99526e-134	3.03266e-129	0.22	0.392	Malignant cells	Responder vs. Non-responder
TRAM1	-0.524627	7.70513e-112	2.59771e-107	0.387	0.546	Malignant cells	Responder vs. Non-responder
GPNMB	-0.527741	3.3107e-109	1.11617e-104	0.135	0.291	Malignant cells	Responder vs. Non-responder
TYMP	-0.527755	5.09525e-51	1.71781e-46	0.493	0.558	Malignant cells	Responder vs. Non-responder
PFN2	-0.528543	7.01146e-204	2.36384e-199	0.29	0.501	Malignant cells	Responder vs. Non-responder
JUP	-0.528758	7.26414e-55	2.44903e-50	0.489	0.555	Malignant cells	Responder vs. Non-responder
SMCHD1	-0.532425	4.31277e-131	1.45401e-126	0.24	0.41	Malignant cells	Responder vs. Non-responder
SSR4	-0.532696	2.59515e-170	8.7493e-166	0.823	0.764	Malignant cells	Responder vs. Non-responder
TMEM30A	-0.535476	4.94736e-135	1.66795e-130	0.28	0.458	Malignant cells	Responder vs. Non-responder
CIB1	-0.538059	7.11124e-141	2.39748e-136	0.54	0.656	Malignant cells	Responder vs. Non-responder
SMIM22	-0.544894	4.92291e-72	1.65971e-67	0.493	0.525	Malignant cells	Responder vs. Non-responder
MARCKS	-0.546655	3.63082e-49	1.22409e-44	0.358	0.428	Malignant cells	Responder vs. Non-responder
SGK1	-0.547026	1.35615e-171	4.57214e-167	0.156	0.348	Malignant cells	Responder vs. Non-responder
ERH	-0.547742	4.30229e-153	1.45048e-148	0.71	0.726	Malignant cells	Responder vs. Non-responder
LAMTOR2	-0.547838	1.81626e-204	6.12335e-200	0.472	0.624	Malignant cells	Responder vs. Non-responder
ACTB	-0.548186	0	0	0.981	0.968	Malignant cells	Responder vs. Non-responder
PRDX1	-0.550438	1.67158e-261	5.63557e-257	0.755	0.85	Malignant cells	Responder vs. Non-responder
GPX2	-0.553714	2.93004e-168	9.87834e-164	0.081	0.26	Malignant cells	Responder vs. Non-responder
RAB5IF	-0.553951	3.05937e-112	1.03144e-107	0.609	0.651	Malignant cells	Responder vs. Non-responder
IL32	-0.554024	3.53823e-131	1.19288e-126	0.179	0.371	Malignant cells	Responder vs. Non-responder
LAPTM4B	-0.554517	2.55637e-231	8.61853e-227	0.241	0.49	Malignant cells	Responder vs. Non-responder
ROMO1	-0.561077	2.68709e-187	9.05924e-183	0.626	0.708	Malignant cells	Responder vs. Non-responder
MIF	-0.561623	0	0	0.945	0.928	Malignant cells	Responder vs. Non-responder
HIST1H4C	-0.562646	5.61666e-99	1.8936e-94	0.418	0.542	Malignant cells	Responder vs. Non-responder
CEBPB	-0.565071	3.29836e-164	1.11201e-159	0.379	0.563	Malignant cells	Responder vs. Non-responder
ERO1A	-0.566783	9.50106e-127	3.20319e-122	0.263	0.458	Malignant cells	Responder vs. Non-responder
PTGR1	-0.573974	6.10026e-124	2.05664e-119	0.209	0.374	Malignant cells	Responder vs. Non-responder
CHCHD2	-0.574573	0	0	0.876	0.865	Malignant cells	Responder vs. Non-responder
UGDH	-0.576017	3.69351e-207	1.24523e-202	0.258	0.471	Malignant cells	Responder vs. Non-responder
HSP90AA1	-0.576317	3.76185e-211	1.26827e-206	0.907	0.874	Malignant cells	Responder vs. Non-responder
EGLN3	-0.577494	0	0	0.038	0.286	Malignant cells	Responder vs. Non-responder
POLR2K	-0.580027	1.17711e-182	3.96851e-178	0.543	0.66	Malignant cells	Responder vs. Non-responder
PLSCR1	-0.583912	8.64433e-269	2.91435e-264	0.227	0.509	Malignant cells	Responder vs. Non-responder
TNFSF10	-0.585409	1.33691e-190	4.50726e-186	0.165	0.384	Malignant cells	Responder vs. Non-responder
ALDOA	-0.591667	6.32786e-182	2.13337e-177	0.311	0.539	Malignant cells	Responder vs. Non-responder
SRI	-0.594683	7.87692e-282	2.65562e-277	0.445	0.675	Malignant cells	Responder vs. Non-responder
KRTCAP2	-0.603099	2.6668e-200	8.99086e-196	0.711	0.726	Malignant cells	Responder vs. Non-responder
FOS	-0.604892	3.59591e-82	1.21233e-77	0.774	0.722	Malignant cells	Responder vs. Non-responder
SEC61B	-0.605031	2.96933e-178	1.00108e-173	0.756	0.746	Malignant cells	Responder vs. Non-responder
GNAS	-0.605722	8.95766e-274	3.01999e-269	0.707	0.791	Malignant cells	Responder vs. Non-responder
BTG1	-0.612572	2.1842e-100	7.3638e-96	0.737	0.705	Malignant cells	Responder vs. Non-responder
RIMKLB	-0.614008	2.85294e-76	9.6184e-72	0.145	0.257	Malignant cells	Responder vs. Non-responder
PSME2	-0.616692	4.95006e-125	1.66886e-120	0.575	0.666	Malignant cells	Responder vs. Non-responder
ZNF706	-0.617349	6.02353e-105	2.03077e-100	0.586	0.647	Malignant cells	Responder vs. Non-responder
DAD1	-0.618652	2.00872e-233	6.77221e-229	0.626	0.705	Malignant cells	Responder vs. Non-responder
YWHAZ	-0.620094	3.5205e-251	1.1869e-246	0.768	0.791	Malignant cells	Responder vs. Non-responder
EFNA1	-0.623286	2.59084e-203	8.73475e-199	0.282	0.495	Malignant cells	Responder vs. Non-responder
SEM1	-0.623702	0	0	0.778	0.796	Malignant cells	Responder vs. Non-responder
AL138963.4	-0.623852	3.67648e-143	1.23949e-138	0.103	0.268	Malignant cells	Responder vs. Non-responder
PSMB3	-0.631552	2.31846e-106	7.81647e-102	0.694	0.709	Malignant cells	Responder vs. Non-responder
SPTSSA	-0.631647	7.67213e-188	2.58658e-183	0.379	0.587	Malignant cells	Responder vs. Non-responder
SOX2	-0.632883	8.55452e-271	2.88407e-266	0.103	0.354	Malignant cells	Responder vs. Non-responder
PHPT1	-0.634773	9.04254e-216	3.0486e-211	0.516	0.652	Malignant cells	Responder vs. Non-responder
DBI	-0.641902	2.0944e-194	7.06107e-190	0.656	0.724	Malignant cells	Responder vs. Non-responder
S100A10	-0.645717	0	0	0.404	0.906	Malignant cells	Responder vs. Non-responder
KRT19	-0.6464	5.75295e-148	1.93955e-143	0.765	0.775	Malignant cells	Responder vs. Non-responder
COX7A2	-0.651276	3.23452e-177	1.09049e-172	0.836	0.82	Malignant cells	Responder vs. Non-responder
PERP	-0.653749	3.00884e-64	1.0144e-59	0.765	0.696	Malignant cells	Responder vs. Non-responder
DAPL1	-0.657508	8.14693e-208	2.74666e-203	0.097	0.302	Malignant cells	Responder vs. Non-responder
COX6C	-0.657517	0	0	0.871	0.847	Malignant cells	Responder vs. Non-responder
APOL1	-0.660186	8.78151e-188	2.9606e-183	0.108	0.301	Malignant cells	Responder vs. Non-responder
MT-ND5	-0.660603	1.31446e-74	4.43156e-70	0.814	0.682	Malignant cells	Responder vs. Non-responder
ACTG1	-0.672371	0	0	0.935	0.931	Malignant cells	Responder vs. Non-responder
CTSB	-0.673203	8.16692e-188	2.75339e-183	0.318	0.549	Malignant cells	Responder vs. Non-responder
LDHA	-0.675201	1.50601e-163	5.07736e-159	0.751	0.77	Malignant cells	Responder vs. Non-responder
BST2	-0.676162	0	0	0.173	0.523	Malignant cells	Responder vs. Non-responder
LGALS3	-0.683107	1.65242e-160	5.57097e-156	0.77	0.796	Malignant cells	Responder vs. Non-responder
SFTA2	-0.683483	8.6433e-174	2.914e-169	0.169	0.388	Malignant cells	Responder vs. Non-responder
SAT1	-0.684046	2.61651e-253	8.82129e-249	0.681	0.795	Malignant cells	Responder vs. Non-responder
IER3	-0.69043	5.41508e-72	1.82564e-67	0.507	0.551	Malignant cells	Responder vs. Non-responder
IGFBP3	-0.693001	9.15447e-166	3.08634e-161	0.079	0.256	Malignant cells	Responder vs. Non-responder
GLRX	-0.706215	2.92179e-36	9.85052e-32	0.255	0.318	Malignant cells	Responder vs. Non-responder
TCIM	-0.7145	3.98911e-256	1.34489e-251	0.091	0.331	Malignant cells	Responder vs. Non-responder
DSTN	-0.715905	0	0	0.732	0.807	Malignant cells	Responder vs. Non-responder
S100A13	-0.719192	9.09424e-200	3.06603e-195	0.559	0.65	Malignant cells	Responder vs. Non-responder
ELF3	-0.72252	4.26793e-229	1.43889e-224	0.5	0.691	Malignant cells	Responder vs. Non-responder
ATP1B1	-0.731242	1.48107e-113	4.99329e-109	0.494	0.584	Malignant cells	Responder vs. Non-responder
TXNRD1	-0.736092	1.06884e-11	3.60348e-07	0.374	0.394	Malignant cells	Responder vs. Non-responder
OAS1	-0.750584	1.01448e-181	3.42023e-177	0.236	0.429	Malignant cells	Responder vs. Non-responder
MT-ATP6	-0.750609	8.66839e-72	2.92246e-67	0.876	0.8	Malignant cells	Responder vs. Non-responder
CRIP1	-0.758792	2.73196e-36	9.21052e-32	0.486	0.546	Malignant cells	Responder vs. Non-responder
ISG15	-0.772122	1.53945e-127	5.19009e-123	0.414	0.577	Malignant cells	Responder vs. Non-responder
CYBA	-0.772754	5.64129e-37	1.9019e-32	0.718	0.65	Malignant cells	Responder vs. Non-responder
MYL12B	-0.805879	1.55957e-229	5.25792e-225	0.853	0.825	Malignant cells	Responder vs. Non-responder
FTL	-0.828181	1.3719e-245	4.62522e-241	0.978	0.96	Malignant cells	Responder vs. Non-responder
NQO1	-0.848671	0	0	0.181	0.494	Malignant cells	Responder vs. Non-responder
AKR1C3	-0.852719	1.17343e-141	3.9561e-137	0.099	0.258	Malignant cells	Responder vs. Non-responder
S100A16	-0.861441	0	0	0.333	0.635	Malignant cells	Responder vs. Non-responder
CP	-0.87777	0	0	0.022	0.302	Malignant cells	Responder vs. Non-responder
IFITM1	-0.879428	3.41904e-193	1.15269e-188	0.155	0.381	Malignant cells	Responder vs. Non-responder
MALL	-0.892202	3.55866e-269	1.19977e-264	0.11	0.347	Malignant cells	Responder vs. Non-responder
SRGN	-0.915636	3.56481e-261	1.20184e-256	0.057	0.276	Malignant cells	Responder vs. Non-responder
TAGLN2	-0.921932	0	0	0.734	0.877	Malignant cells	Responder vs. Non-responder
MYL12A	-0.922109	0	0	0.723	0.796	Malignant cells	Responder vs. Non-responder
MT-ND4L	-0.925772	9.23306e-238	3.11283e-233	0.44	0.625	Malignant cells	Responder vs. Non-responder
PGK1	-0.937986	9.98689e-268	3.36698e-263	0.668	0.741	Malignant cells	Responder vs. Non-responder
NDRG1	-0.940732	0	0	0.175	0.488	Malignant cells	Responder vs. Non-responder
S100A6	-0.963886	0	0	0.934	0.964	Malignant cells	Responder vs. Non-responder
SLPI	-0.985241	4.53464e-23	1.52881e-18	0.481	0.464	Malignant cells	Responder vs. Non-responder
TM4SF1	-1.00541	0	0	0.206	0.636	Malignant cells	Responder vs. Non-responder
SOD2	-1.00613	5.80834e-158	1.95822e-153	0.364	0.535	Malignant cells	Responder vs. Non-responder
MUC1	-1.03321	0	0	0.194	0.52	Malignant cells	Responder vs. Non-responder
S100A4	-1.07018	1.0675e-235	3.59898e-231	0.24	0.498	Malignant cells	Responder vs. Non-responder
KRT6A	-1.09371	4.16671e-132	1.40476e-127	0.093	0.251	Malignant cells	Responder vs. Non-responder
IFITM3	-1.09598	0	0	0.62	0.78	Malignant cells	Responder vs. Non-responder
LCN2	-1.1261	8.30135e-188	2.79872e-183	0.116	0.329	Malignant cells	Responder vs. Non-responder
CRABP2	-1.16355	4.84006e-237	1.63178e-232	0.114	0.339	Malignant cells	Responder vs. Non-responder
S100A11	-1.22674	0	0	0.465	0.943	Malignant cells	Responder vs. Non-responder
IFI27	-1.24346	0	0	0.303	0.666	Malignant cells	Responder vs. Non-responder
S100P	-1.42179	0	0	0.175	0.482	Malignant cells	Responder vs. Non-responder
HSPA1A	-1.42722	0	0	0.219	0.515	Malignant cells	Responder vs. Non-responder
MTRNR2L12	-1.45243	8.70169e-258	2.93369e-253	0.258	0.537	Malignant cells	Responder vs. Non-responder
SEC61G	-1.53176	0	0	0.724	0.784	Malignant cells	Responder vs. Non-responder
KRT17	-1.68701	9.61657e-87	3.24213e-82	0.226	0.333	Malignant cells	Responder vs. Non-responder
S100A9	-3.25164	4.04948e-239	1.36524e-234	0.099	0.319	Malignant cells	Responder vs. Non-responder

## Sheet: PR vs. PD
Table S3. List of DEGs in comparison between ICI response groups.
gene	avg_logFC	p_val	p_val_adj	pct.1	pct.2	celltype	group
LYZ	1.94	0	0	0.548	0.082	Malignant cells	PR vs. PD
SNHG29	1.4113	0	0	0.877	0.746	Malignant cells	PR vs. PD
CALML3	1.2951	0	0	0.414	0.008	Malignant cells	PR vs. PD
SLC25A6	1.20566	0	0	0.853	0.736	Malignant cells	PR vs. PD
RPL17	1.1427	4.90114e-295	1.65237e-290	0.945	0.916	Malignant cells	PR vs. PD
RPS4Y1	1.12274	0	0	0.787	0.315	Malignant cells	PR vs. PD
EEF2	1.12109	0	0	0.898	0.748	Malignant cells	PR vs. PD
GAS5	1.09615	0	0	0.85	0.721	Malignant cells	PR vs. PD
MT3	1.06618	0	0	0.461	0.009	Malignant cells	PR vs. PD
MIR205HG	0.991794	0	0	0.598	0.091	Malignant cells	PR vs. PD
RPL23A	0.989311	0	0	0.956	0.931	Malignant cells	PR vs. PD
ZFAS1	0.987489	0	0	0.878	0.706	Malignant cells	PR vs. PD
NUPR1	0.951815	0	0	0.567	0.139	Malignant cells	PR vs. PD
SNHG8	0.946115	0	0	0.765	0.524	Malignant cells	PR vs. PD
RPL4	0.94545	0	0	0.92	0.835	Malignant cells	PR vs. PD
RPS6	0.933755	0	0	0.975	0.922	Malignant cells	PR vs. PD
RPL3	0.901209	3.72375e-288	1.25543e-283	0.957	0.935	Malignant cells	PR vs. PD
RPS17	0.899236	0	0	0.907	0.883	Malignant cells	PR vs. PD
RPL7A	0.898136	0	0	0.957	0.92	Malignant cells	PR vs. PD
RPL13A	0.888913	3.69249e-283	1.24489e-278	0.963	0.914	Malignant cells	PR vs. PD
RPL6	0.870473	0	0	0.952	0.899	Malignant cells	PR vs. PD
SNHG7	0.865892	0	0	0.715	0.478	Malignant cells	PR vs. PD
IGFBP2	0.857139	0	0	0.629	0.173	Malignant cells	PR vs. PD
RPL18A	0.845401	0	0	0.956	0.942	Malignant cells	PR vs. PD
FGGY	0.83822	0	0	0.58	0.126	Malignant cells	PR vs. PD
SNHG5	0.823549	3.66083e-306	1.23421e-301	0.774	0.625	Malignant cells	PR vs. PD
RPS7	0.819102	0	0	0.972	0.944	Malignant cells	PR vs. PD
RPL36	0.815849	0	0	0.939	0.914	Malignant cells	PR vs. PD
RPL5	0.815607	0	0	0.937	0.864	Malignant cells	PR vs. PD
RPLP0	0.793595	0	0	0.974	0.938	Malignant cells	PR vs. PD
RPL27A	0.782379	3.82936e-261	1.29103e-256	0.932	0.892	Malignant cells	PR vs. PD
FBL	0.773223	0	0	0.81	0.51	Malignant cells	PR vs. PD
NACA	0.771283	0	0	0.939	0.88	Malignant cells	PR vs. PD
RPL19	0.769998	6.80044e-264	2.2927e-259	0.965	0.961	Malignant cells	PR vs. PD
RPS2	0.74879	1.92509e-163	6.49024e-159	0.967	0.963	Malignant cells	PR vs. PD
RAB3C	0.742707	0	0	0.474	0.028	Malignant cells	PR vs. PD
WFDC2	0.713288	0	0	0.77	0.343	Malignant cells	PR vs. PD
CD74	0.710892	0	0	0.806	0.445	Malignant cells	PR vs. PD
RPS28	0.69738	0	0	0.947	0.917	Malignant cells	PR vs. PD
RPL41	0.69702	0	0	0.993	0.992	Malignant cells	PR vs. PD
TMEM176B	0.694124	0	0	0.504	0.028	Malignant cells	PR vs. PD
RPL12	0.688579	4.41895e-251	1.4898e-246	0.96	0.945	Malignant cells	PR vs. PD
RPL7	0.681265	0	0	0.94	0.891	Malignant cells	PR vs. PD
KIT	0.673253	0	0	0.498	0.024	Malignant cells	PR vs. PD
RPL21	0.671009	2.20125e-238	7.42129e-234	0.944	0.918	Malignant cells	PR vs. PD
CAMP	0.668152	0	0	0.361	0.006	Malignant cells	PR vs. PD
RPL23	0.666364	4.62797e-182	1.56027e-177	0.898	0.874	Malignant cells	PR vs. PD
EPB41L4A-AS1	0.663613	0	0	0.653	0.392	Malignant cells	PR vs. PD
RACK1	0.651118	4.95404e-304	1.6702e-299	0.938	0.896	Malignant cells	PR vs. PD
RAB11FIP1	0.648842	0	0	0.729	0.408	Malignant cells	PR vs. PD
ID2	0.64751	0	0	0.529	0.169	Malignant cells	PR vs. PD
EEF1G	0.646131	0	0	0.933	0.877	Malignant cells	PR vs. PD
HLA-DRA	0.638183	0	0	0.741	0.364	Malignant cells	PR vs. PD
CD9	0.630628	3.25705e-106	1.09808e-101	0.745	0.521	Malignant cells	PR vs. PD
RPL31	0.630582	2.10981e-210	7.113e-206	0.917	0.885	Malignant cells	PR vs. PD
RPL34	0.629919	3.99556e-288	1.34706e-283	0.958	0.94	Malignant cells	PR vs. PD
RPS9	0.62375	1.70719e-292	5.75562e-288	0.951	0.93	Malignant cells	PR vs. PD
RPL14	0.618899	0	0	0.947	0.906	Malignant cells	PR vs. PD
RPL29	0.61709	1.55904e-289	5.25615e-285	0.954	0.931	Malignant cells	PR vs. PD
FXYD3	0.61029	1.16344e-124	3.92243e-120	0.8	0.517	Malignant cells	PR vs. PD
SPRR2A	0.607014	1.42667e-259	4.80987e-255	0.257	0.001	Malignant cells	PR vs. PD
PTMS	0.602957	0	0	0.782	0.377	Malignant cells	PR vs. PD
SPINT2	0.601483	2.57938e-51	8.69611e-47	0.879	0.674	Malignant cells	PR vs. PD
HLA-DRB1	0.595847	0	0	0.594	0.183	Malignant cells	PR vs. PD
HLA-DRB5	0.59462	0	0	0.494	0.123	Malignant cells	PR vs. PD
RPL10A	0.593151	0	0	0.951	0.916	Malignant cells	PR vs. PD
RPSA	0.59261	0	0	0.938	0.873	Malignant cells	PR vs. PD
RPS3A	0.583398	2.82629e-299	9.52855e-295	0.966	0.945	Malignant cells	PR vs. PD
RPL13	0.583126	0	0	0.989	0.975	Malignant cells	PR vs. PD
EIF3D	0.579588	0	0	0.797	0.53	Malignant cells	PR vs. PD
EMB	0.574261	0	0	0.548	0.149	Malignant cells	PR vs. PD
LDLRAD4	0.571559	0	0	0.454	0.037	Malignant cells	PR vs. PD
ADIRF	0.570384	0	0	0.571	0.16	Malignant cells	PR vs. PD
BTF3	0.565058	0	0	0.9	0.819	Malignant cells	PR vs. PD
RPLP2	0.562113	2.31149e-260	7.79295e-256	0.953	0.939	Malignant cells	PR vs. PD
NAP1L1	0.56039	0	0	0.807	0.601	Malignant cells	PR vs. PD
HLA-DQB1	0.559756	0	0	0.559	0.154	Malignant cells	PR vs. PD
CEACAM6	0.557048	1.64801e-09	5.55611e-05	0.429	0.379	Malignant cells	PR vs. PD
RPL27	0.552928	3.75521e-210	1.26603e-205	0.931	0.916	Malignant cells	PR vs. PD
TMEM176A	0.550778	0	0	0.442	0.02	Malignant cells	PR vs. PD
RPS15	0.550756	0	0	0.965	0.94	Malignant cells	PR vs. PD
EEF1B2	0.550484	4.51718e-305	1.52292e-300	0.897	0.812	Malignant cells	PR vs. PD
CREG1	0.549751	7.72156e-228	2.60325e-223	0.652	0.436	Malignant cells	PR vs. PD
RPS14	0.539682	2.33802e-301	7.88242e-297	0.973	0.969	Malignant cells	PR vs. PD
RPL38	0.537989	5.17037e-175	1.74314e-170	0.914	0.891	Malignant cells	PR vs. PD
YBX3	0.534687	0	0	0.796	0.495	Malignant cells	PR vs. PD
RPS5	0.53269	0	0	0.957	0.926	Malignant cells	PR vs. PD
KLF4	0.532332	2.1815e-286	7.35469e-282	0.623	0.31	Malignant cells	PR vs. PD
RPL32	0.530352	0	0	0.974	0.96	Malignant cells	PR vs. PD
EVI2B	0.527722	0	0	0.42	0.045	Malignant cells	PR vs. PD
RPS8	0.527441	0	0	0.975	0.953	Malignant cells	PR vs. PD
PFDN5	0.525898	0	0	0.908	0.815	Malignant cells	PR vs. PD
LGALS9	0.523949	0	0	0.539	0.126	Malignant cells	PR vs. PD
NPM1	0.518812	3.38378e-199	1.14081e-194	0.898	0.844	Malignant cells	PR vs. PD
PDK4	0.517619	1.62359e-301	5.47377e-297	0.476	0.144	Malignant cells	PR vs. PD
RPL15	0.514049	0	0	0.956	0.928	Malignant cells	PR vs. PD
CXCL8	0.51059	1.44102e-164	4.85826e-160	0.424	0.177	Malignant cells	PR vs. PD
RPL11	0.504648	0	0	0.974	0.961	Malignant cells	PR vs. PD
INSIG1	0.503507	2.50901e-232	8.45886e-228	0.604	0.329	Malignant cells	PR vs. PD
C12orf57	0.502012	0	0	0.803	0.534	Malignant cells	PR vs. PD
RPS19	0.499644	0	0	0.989	0.975	Malignant cells	PR vs. PD
RPS18	0.487755	1.78059e-213	6.00308e-209	0.983	0.982	Malignant cells	PR vs. PD
ATP5F1D	0.483159	0	0	0.827	0.634	Malignant cells	PR vs. PD
HNRNPA1	0.476012	2.3192e-299	7.81896e-295	0.911	0.796	Malignant cells	PR vs. PD
PMAIP1	0.474337	1.86797e-199	6.29769e-195	0.606	0.365	Malignant cells	PR vs. PD
BCAT1	0.47083	0	0	0.43	0.022	Malignant cells	PR vs. PD
RPL35A	0.467832	0	0	0.954	0.945	Malignant cells	PR vs. PD
RRAD	0.46295	8.36927e-163	2.82161e-158	0.355	0.119	Malignant cells	PR vs. PD
RPL37A	0.459762	3.92222e-254	1.32234e-249	0.943	0.908	Malignant cells	PR vs. PD
RPS27A	0.457245	0	0	0.976	0.964	Malignant cells	PR vs. PD
FABP5	0.45545	8.88257e-55	2.99467e-50	0.381	0.249	Malignant cells	PR vs. PD
FXYD5	0.454839	2.17409e-183	7.32972e-179	0.616	0.311	Malignant cells	PR vs. PD
CDC42EP3	0.451905	1.71553e-14	5.78373e-10	0.287	0.248	Malignant cells	PR vs. PD
UBA52	0.451514	6.04432e-252	2.03778e-247	0.915	0.874	Malignant cells	PR vs. PD
RPL24	0.449766	0	0	0.959	0.903	Malignant cells	PR vs. PD
EIF3M	0.44965	2.43184e-246	8.19871e-242	0.745	0.546	Malignant cells	PR vs. PD
METTL7A	0.446798	0	0	0.455	0.07	Malignant cells	PR vs. PD
RPS20	0.441938	1.1163e-221	3.76348e-217	0.908	0.862	Malignant cells	PR vs. PD
EIF4EBP1	0.441012	1.66625e-34	5.61761e-30	0.481	0.388	Malignant cells	PR vs. PD
EEF1A1	0.440101	3.58266e-262	1.20786e-257	0.988	0.971	Malignant cells	PR vs. PD
DST	0.437946	3.15946e-143	1.06518e-138	0.466	0.258	Malignant cells	PR vs. PD
CLEC2B	0.436428	1.38268e-303	4.66157e-299	0.483	0.128	Malignant cells	PR vs. PD
RPLP1	0.43459	0	0	0.989	0.986	Malignant cells	PR vs. PD
PHB2	0.434401	0	0	0.779	0.506	Malignant cells	PR vs. PD
EIF3L	0.431941	7.97426e-296	2.68844e-291	0.773	0.534	Malignant cells	PR vs. PD
CHPT1	0.42952	2.94133e-286	9.91639e-282	0.533	0.227	Malignant cells	PR vs. PD
PNRC1	0.427844	4.76686e-212	1.6071e-207	0.737	0.525	Malignant cells	PR vs. PD
DYRK4	0.425832	0	0	0.508	0.187	Malignant cells	PR vs. PD
RPS3	0.424419	0	0	0.975	0.958	Malignant cells	PR vs. PD
DANCR	0.420817	5.99822e-246	2.02224e-241	0.642	0.39	Malignant cells	PR vs. PD
RPS12	0.418799	6.88561e-229	2.32141e-224	0.969	0.957	Malignant cells	PR vs. PD
PDLIM1	0.418513	2.06408e-277	6.95885e-273	0.757	0.444	Malignant cells	PR vs. PD
SNHG3	0.418433	6.33613e-220	2.13616e-215	0.554	0.293	Malignant cells	PR vs. PD
PDCD5	0.418412	2.44991e-83	8.25962e-79	0.774	0.61	Malignant cells	PR vs. PD
RPL18	0.414902	1.32754e-225	4.47568e-221	0.959	0.927	Malignant cells	PR vs. PD
RAB27B	0.4108	6.56895e-111	2.21466e-106	0.39	0.211	Malignant cells	PR vs. PD
UBXN1	0.409467	5.32238e-281	1.79439e-276	0.784	0.561	Malignant cells	PR vs. PD
RPL22	0.408218	0	0	0.932	0.889	Malignant cells	PR vs. PD
SERPINF1	0.407544	0	0	0.417	0.031	Malignant cells	PR vs. PD
NAPSA	0.407296	1.77891e-71	5.99741e-67	0.209	0.414	Malignant cells	PR vs. PD
CD24	0.40667	5.83112e-230	1.9659e-225	0.71	0.37	Malignant cells	PR vs. PD
ERP29	0.406074	1.20294e-258	4.05559e-254	0.828	0.63	Malignant cells	PR vs. PD
EIF3G	0.405797	1.35638e-261	4.57289e-257	0.786	0.584	Malignant cells	PR vs. PD
GPI	0.404135	2.42326e-33	8.16976e-29	0.563	0.439	Malignant cells	PR vs. PD
MIB2	0.401622	8.30363e-291	2.79949e-286	0.552	0.254	Malignant cells	PR vs. PD
ATP5MC2	0.393595	2.70751e-279	9.1281e-275	0.901	0.817	Malignant cells	PR vs. PD
CIRBP	0.390583	1.28857e-219	4.34428e-215	0.81	0.601	Malignant cells	PR vs. PD
ANXA1	0.390541	5.17046e-209	1.74317e-204	0.88	0.697	Malignant cells	PR vs. PD
IGFBP6	0.389047	3.54601e-265	1.1955e-260	0.304	0.026	Malignant cells	PR vs. PD
RPS13	0.386003	2.74992e-212	9.27107e-208	0.945	0.938	Malignant cells	PR vs. PD
EIF3F	0.38459	9.99116e-230	3.36842e-225	0.803	0.62	Malignant cells	PR vs. PD
RPS23	0.383966	1.26078e-217	4.25059e-213	0.967	0.953	Malignant cells	PR vs. PD
LPCAT1	0.383753	2.16451e-51	7.29743e-47	0.28	0.468	Malignant cells	PR vs. PD
CLTA	0.383178	2.93733e-220	9.90291e-216	0.845	0.668	Malignant cells	PR vs. PD
SELENOP	0.382502	2.48911e-32	8.39177e-28	0.339	0.257	Malignant cells	PR vs. PD
CCND2	0.379705	0	0	0.395	0.031	Malignant cells	PR vs. PD
EIF3K	0.377551	4.39194e-189	1.4807e-184	0.879	0.723	Malignant cells	PR vs. PD
IMPDH2	0.376621	3.51161e-233	1.18391e-228	0.709	0.479	Malignant cells	PR vs. PD
ADD3	0.376593	5.38664e-145	1.81605e-140	0.453	0.247	Malignant cells	PR vs. PD
PLAC8	0.375349	3.3701e-192	1.1362e-187	0.523	0.238	Malignant cells	PR vs. PD
RPS4X	0.36977	6.11805e-243	2.06264e-238	0.961	0.956	Malignant cells	PR vs. PD
ATF4	0.369422	2.91617e-228	9.83158e-224	0.78	0.551	Malignant cells	PR vs. PD
PRSS21	0.367656	0	0	0.386	0.005	Malignant cells	PR vs. PD
RHOBTB3	0.364497	8.46735e-76	2.85468e-71	0.426	0.273	Malignant cells	PR vs. PD
COX4I1	0.363372	1.81072e-263	6.10467e-259	0.895	0.805	Malignant cells	PR vs. PD
NFIA	0.361882	4.01143e-230	1.35241e-225	0.56	0.271	Malignant cells	PR vs. PD
IGF2BP2	0.354049	2.25479e-52	7.60178e-48	0.394	0.291	Malignant cells	PR vs. PD
NOB1	0.351526	5.84114e-219	1.96928e-214	0.58	0.34	Malignant cells	PR vs. PD
GFI1B	0.351009	0	0	0.342	0.001	Malignant cells	PR vs. PD
GCLC	0.350093	1.52455e-175	5.13986e-171	0.625	0.363	Malignant cells	PR vs. PD
ZNF581	0.350068	4.44023e-201	1.49698e-196	0.556	0.326	Malignant cells	PR vs. PD
SYTL1	0.349514	2.17329e-189	7.32702e-185	0.446	0.199	Malignant cells	PR vs. PD
RPL26	0.348934	2.50561e-230	8.44741e-226	0.967	0.926	Malignant cells	PR vs. PD
RPS25	0.345071	2.48812e-246	8.38844e-242	0.965	0.934	Malignant cells	PR vs. PD
S100A2	0.344058	1.08826e-19	3.66896e-15	0.355	0.287	Malignant cells	PR vs. PD
PLD3	0.343956	1.32088e-97	4.45321e-93	0.641	0.471	Malignant cells	PR vs. PD
TCF4	0.3435	0	0	0.384	0.031	Malignant cells	PR vs. PD
HLA-DPB1	0.340744	9.21002e-234	3.10507e-229	0.532	0.208	Malignant cells	PR vs. PD
RPL35	0.340023	5.46658e-151	1.843e-146	0.948	0.942	Malignant cells	PR vs. PD
RPS15A	0.339936	6.69423e-205	2.25689e-200	0.968	0.953	Malignant cells	PR vs. PD
CRYM	0.33894	4.85443e-221	1.63662e-216	0.457	0.17	Malignant cells	PR vs. PD
RPL9	0.337225	3.39137e-75	1.14337e-70	0.93	0.912	Malignant cells	PR vs. PD
CD99	0.336647	1.68239e-204	5.67201e-200	0.655	0.365	Malignant cells	PR vs. PD
ZNF428	0.335042	2.24779e-189	7.57822e-185	0.653	0.424	Malignant cells	PR vs. PD
LETMD1	0.327254	2.83466e-211	9.55678e-207	0.545	0.299	Malignant cells	PR vs. PD
ABRAXAS1	0.325833	1.08607e-242	3.66158e-238	0.411	0.13	Malignant cells	PR vs. PD
SLC25A3	0.323516	5.79626e-206	1.95415e-201	0.864	0.706	Malignant cells	PR vs. PD
RAMP2	0.321764	0	0	0.346	0.019	Malignant cells	PR vs. PD
SNHG1	0.321114	3.81232e-203	1.28529e-198	0.498	0.245	Malignant cells	PR vs. PD
RASSF6	0.319646	2.93164e-270	9.88374e-266	0.393	0.093	Malignant cells	PR vs. PD
PLA1A	0.317444	0	0	0.321	0.011	Malignant cells	PR vs. PD
SLC34A2	0.31732	6.53808e-40	2.20425e-35	0.193	0.339	Malignant cells	PR vs. PD
PITX1	0.315078	1.36146e-50	4.59002e-46	0.278	0.16	Malignant cells	PR vs. PD
LINC01326	0.310762	0	0	0.314	0	Malignant cells	PR vs. PD
CRYL1	0.309249	2.13435e-222	7.19574e-218	0.488	0.225	Malignant cells	PR vs. PD
CYTIP	0.307929	2.07253e-273	6.98732e-269	0.379	0.065	Malignant cells	PR vs. PD
PLAT	0.306284	2.61065e-179	8.80154e-175	0.303	0.075	Malignant cells	PR vs. PD
PLAGL1	0.306061	2.87729e-196	9.70051e-192	0.363	0.115	Malignant cells	PR vs. PD
HLA-DPA1	0.305716	2.28139e-141	7.69147e-137	0.427	0.182	Malignant cells	PR vs. PD
ATP5PO	0.305304	5.62472e-212	1.89632e-207	0.83	0.655	Malignant cells	PR vs. PD
SHMT2	0.302986	2.42275e-179	8.16805e-175	0.567	0.342	Malignant cells	PR vs. PD
RNASE6	0.301917	2.07576e-234	6.99823e-230	0.271	0.022	Malignant cells	PR vs. PD
UQCRFS1	0.29972	4.46972e-98	1.50692e-93	0.787	0.604	Malignant cells	PR vs. PD
GM2A	0.295766	4.26898e-164	1.43924e-159	0.397	0.171	Malignant cells	PR vs. PD
C12orf10	0.294382	3.87584e-250	1.3067e-245	0.586	0.318	Malignant cells	PR vs. PD
PRKCSH	0.293788	3.74237e-175	1.2617e-170	0.602	0.397	Malignant cells	PR vs. PD
PHGDH	0.292995	1.17145e-114	3.94942e-110	0.28	0.099	Malignant cells	PR vs. PD
ATP5IF1	0.291171	4.31019e-142	1.45314e-137	0.796	0.628	Malignant cells	PR vs. PD
GGA1	0.287771	2.55264e-79	8.60596e-75	0.417	0.289	Malignant cells	PR vs. PD
C15orf48	0.286063	4.96163e-73	1.67276e-68	0.452	0.278	Malignant cells	PR vs. PD
H3F3B	0.286037	1.4766e-182	4.9782e-178	0.947	0.868	Malignant cells	PR vs. PD
EML4	0.285222	5.46463e-140	1.84235e-135	0.614	0.424	Malignant cells	PR vs. PD
HSP90B1	0.280601	1.15109e-93	3.88077e-89	0.83	0.629	Malignant cells	PR vs. PD
NOP53	0.277972	4.65748e-127	1.57022e-122	0.808	0.666	Malignant cells	PR vs. PD
WDR11	0.275193	2.44572e-12	8.24549e-08	0.268	0.235	Malignant cells	PR vs. PD
DHRS9	0.274474	1.81941e-238	6.13394e-234	0.291	0.025	Malignant cells	PR vs. PD
PEBP1	0.273082	1.82989e-118	6.1693e-114	0.85	0.701	Malignant cells	PR vs. PD
PAX1	0.27288	1.1697e-281	3.94354e-277	0.274	0	Malignant cells	PR vs. PD
AHNAK	0.272838	1.20843e-20	4.0741e-16	0.444	0.388	Malignant cells	PR vs. PD
YIF1B	0.271759	6.4171e-24	2.16346e-19	0.323	0.277	Malignant cells	PR vs. PD
LINC00662	0.269276	6.93113e-08	0.00233676	0.257	0.236	Malignant cells	PR vs. PD
LSR	0.266826	7.03132e-15	2.37054e-10	0.504	0.477	Malignant cells	PR vs. PD
CAMK2B	0.266292	1.04946e-195	3.53814e-191	0.271	0.043	Malignant cells	PR vs. PD
ATP5F1B	0.265587	3.24623e-160	1.09443e-155	0.853	0.679	Malignant cells	PR vs. PD
ID1	0.26556	8.43189e-12	2.84273e-07	0.274	0.364	Malignant cells	PR vs. PD
TPT1	0.26476	1.40248e-131	4.72832e-127	0.969	0.919	Malignant cells	PR vs. PD
SPHK1	0.264543	8.69528e-239	2.93153e-234	0.37	0.09	Malignant cells	PR vs. PD
EIF4B	0.263521	5.44081e-159	1.83431e-154	0.779	0.596	Malignant cells	PR vs. PD
SNHG6	0.262395	1.94265e-128	6.54943e-124	0.816	0.674	Malignant cells	PR vs. PD
PLAU	0.259887	5.05509e-244	1.70427e-239	0.44	0.124	Malignant cells	PR vs. PD
LRBA	0.258151	3.52691e-148	1.18906e-143	0.493	0.287	Malignant cells	PR vs. PD
HAP1	0.25792	1.04867e-236	3.5355e-232	0.288	0.032	Malignant cells	PR vs. PD
PTRHD1	0.252359	2.27498e-157	7.66987e-153	0.692	0.495	Malignant cells	PR vs. PD
ATP5F1A	0.250885	2.87641e-167	9.69752e-163	0.754	0.574	Malignant cells	PR vs. PD
C19orf48	0.250253	1.95714e-143	6.5983e-139	0.597	0.402	Malignant cells	PR vs. PD
ESPN	0.250207	1.08383e-246	3.65403e-242	0.404	0.106	Malignant cells	PR vs. PD
ARFGAP3	-0.250172	1.94197e-94	6.54715e-90	0.213	0.391	Malignant cells	PR vs. PD
SSU72	-0.250481	7.32106e-22	2.46822e-17	0.719	0.666	Malignant cells	PR vs. PD
GOLPH3L	-0.250508	5.89945e-140	1.98894e-135	0.146	0.349	Malignant cells	PR vs. PD
CYSTM1	-0.250673	2.18404e-48	7.36328e-44	0.487	0.579	Malignant cells	PR vs. PD
MAFK	-0.25126	6.66937e-106	2.24851e-101	0.161	0.342	Malignant cells	PR vs. PD
NDUFA13	-0.251298	3.19174e-24	1.07606e-19	0.801	0.725	Malignant cells	PR vs. PD
SBDS	-0.251436	5.69224e-14	1.91908e-09	0.52	0.559	Malignant cells	PR vs. PD
PABPC1	-0.251462	7.94419e-15	2.6783e-10	0.918	0.858	Malignant cells	PR vs. PD
CDC5L	-0.251629	5.6557e-93	1.90676e-88	0.3	0.492	Malignant cells	PR vs. PD
RAB2A	-0.251718	2.08678e-55	7.03537e-51	0.492	0.631	Malignant cells	PR vs. PD
MTLN	-0.252101	5.58915e-41	1.88433e-36	0.359	0.485	Malignant cells	PR vs. PD
CAPZA1	-0.252703	2.35466e-41	7.9385e-37	0.43	0.545	Malignant cells	PR vs. PD
LSM2	-0.253506	2.41101e-15	8.12846e-11	0.593	0.594	Malignant cells	PR vs. PD
FKBP11	-0.253707	7.80287e-56	2.63066e-51	0.203	0.332	Malignant cells	PR vs. PD
BANF1	-0.25371	4.64719e-27	1.56675e-22	0.673	0.674	Malignant cells	PR vs. PD
TMEM125	-0.25382	5.16551e-57	1.7415e-52	0.233	0.364	Malignant cells	PR vs. PD
CWC15	-0.254289	5.36153e-21	1.80759e-16	0.518	0.562	Malignant cells	PR vs. PD
PET100	-0.254535	3.54734e-39	1.19595e-34	0.45	0.56	Malignant cells	PR vs. PD
COTL1	-0.254655	5.57408e-44	1.87924e-39	0.147	0.258	Malignant cells	PR vs. PD
PARK7	-0.255307	1.09472e-16	3.69073e-12	0.82	0.74	Malignant cells	PR vs. PD
SDCBP	-0.255371	9.43358e-53	3.18044e-48	0.357	0.505	Malignant cells	PR vs. PD
UBL5	-0.255475	1.5464e-24	5.21353e-20	0.824	0.75	Malignant cells	PR vs. PD
DCAF13	-0.255601	4.40908e-45	1.48648e-40	0.275	0.41	Malignant cells	PR vs. PD
GPATCH4	-0.255656	1.23266e-51	4.15578e-47	0.295	0.419	Malignant cells	PR vs. PD
NDUFB3	-0.256241	7.60424e-25	2.56369e-20	0.633	0.632	Malignant cells	PR vs. PD
HNRNPH2	-0.256284	1.70952e-64	5.76347e-60	0.272	0.429	Malignant cells	PR vs. PD
SNX9	-0.257283	5.51352e-92	1.85883e-87	0.142	0.296	Malignant cells	PR vs. PD
ATP5MG	-0.2574	3.87748e-57	1.30725e-52	0.896	0.84	Malignant cells	PR vs. PD
CAT	-0.257768	4.11823e-91	1.38842e-86	0.162	0.329	Malignant cells	PR vs. PD
TAF11	-0.258031	2.57873e-109	8.69392e-105	0.253	0.457	Malignant cells	PR vs. PD
COX20	-0.258287	1.16232e-41	3.91865e-37	0.427	0.532	Malignant cells	PR vs. PD
SNF8	-0.258532	2.42942e-17	8.19055e-13	0.593	0.59	Malignant cells	PR vs. PD
TAPBP	-0.25858	1.3569e-58	4.57466e-54	0.463	0.566	Malignant cells	PR vs. PD
SUPT16H	-0.258678	1.45736e-75	4.91334e-71	0.29	0.464	Malignant cells	PR vs. PD
OSTC	-0.258739	2.45827e-41	8.28781e-37	0.567	0.611	Malignant cells	PR vs. PD
LGMN	-0.258908	2.92882e-175	9.87423e-171	0.154	0.388	Malignant cells	PR vs. PD
MRPL24	-0.259857	1.78395e-34	6.0144e-30	0.395	0.49	Malignant cells	PR vs. PD
AK2	-0.26121	7.13183e-28	2.40442e-23	0.523	0.572	Malignant cells	PR vs. PD
SDF2L1	-0.261448	3.30788e-11	1.11522e-06	0.542	0.549	Malignant cells	PR vs. PD
BOLA1	-0.261526	2.27446e-179	7.66813e-175	0.123	0.346	Malignant cells	PR vs. PD
SLC16A3	-0.262518	1.64254e-72	5.53764e-68	0.184	0.326	Malignant cells	PR vs. PD
ELOB	-0.263244	1.21553e-26	4.09803e-22	0.869	0.817	Malignant cells	PR vs. PD
CHCHD7	-0.264028	9.61583e-78	3.24188e-73	0.293	0.467	Malignant cells	PR vs. PD
HCFC1R1	-0.264502	9.04499e-43	3.04943e-38	0.334	0.463	Malignant cells	PR vs. PD
PDIA4	-0.264917	2.1772e-29	7.3402e-25	0.476	0.545	Malignant cells	PR vs. PD
ECI2	-0.265182	8.71888e-39	2.93948e-34	0.217	0.319	Malignant cells	PR vs. PD
EEF1E1	-0.265242	6.86047e-47	2.31294e-42	0.329	0.45	Malignant cells	PR vs. PD
HMGN1	-0.265512	1.33016e-22	4.4845e-18	0.849	0.77	Malignant cells	PR vs. PD
ZFP36L1	-0.265539	1.21939e-47	4.11105e-43	0.519	0.609	Malignant cells	PR vs. PD
RWDD1	-0.266055	1.55026e-12	5.22653e-08	0.559	0.559	Malignant cells	PR vs. PD
SOD1	-0.266256	6.09762e-14	2.05575e-09	0.798	0.733	Malignant cells	PR vs. PD
PSMG4	-0.266389	5.5423e-68	1.86853e-63	0.304	0.452	Malignant cells	PR vs. PD
MT1E	-0.266507	1.2725e-91	4.29012e-87	0.172	0.353	Malignant cells	PR vs. PD
NEK6	-0.266739	1.67732e-116	5.65492e-112	0.183	0.377	Malignant cells	PR vs. PD
GTF2H5	-0.267117	3.74083e-25	1.26118e-20	0.438	0.514	Malignant cells	PR vs. PD
CHMP1B	-0.267561	2.93674e-44	9.90091e-40	0.356	0.469	Malignant cells	PR vs. PD
SNU13	-0.268803	1.74186e-20	5.87251e-16	0.789	0.704	Malignant cells	PR vs. PD
JUNB	-0.269337	1.34874e-15	4.54715e-11	0.771	0.675	Malignant cells	PR vs. PD
MTCH1	-0.270029	2.17087e-23	7.31886e-19	0.625	0.632	Malignant cells	PR vs. PD
UBE2M	-0.270104	8.71498e-47	2.93817e-42	0.36	0.467	Malignant cells	PR vs. PD
CLDN7	-0.270211	6.84204e-23	2.30672e-18	0.509	0.557	Malignant cells	PR vs. PD
BNIP3L	-0.270479	4.71269e-37	1.58884e-32	0.322	0.445	Malignant cells	PR vs. PD
RPL39L	-0.270524	1.49747e-67	5.04857e-63	0.244	0.399	Malignant cells	PR vs. PD
ACTR3	-0.270678	1.10315e-35	3.71917e-31	0.433	0.547	Malignant cells	PR vs. PD
KLHDC2	-0.270997	2.09856e-63	7.07509e-59	0.324	0.476	Malignant cells	PR vs. PD
PDZD11	-0.271138	1.11456e-22	3.75764e-18	0.358	0.451	Malignant cells	PR vs. PD
UFM1	-0.272125	4.43644e-59	1.4957e-54	0.363	0.501	Malignant cells	PR vs. PD
EIF5	-0.272223	2.07037e-24	6.98005e-20	0.591	0.604	Malignant cells	PR vs. PD
FUNDC2	-0.27231	5.66048e-63	1.90837e-58	0.364	0.513	Malignant cells	PR vs. PD
COA6	-0.272507	1.35209e-83	4.55845e-79	0.346	0.512	Malignant cells	PR vs. PD
UBE2K	-0.272735	8.96069e-53	3.02101e-48	0.338	0.464	Malignant cells	PR vs. PD
RAB18	-0.272915	2.29724e-53	7.74492e-49	0.351	0.497	Malignant cells	PR vs. PD
FOLR1	-0.273223	1.9144e-92	6.45422e-88	0.122	0.276	Malignant cells	PR vs. PD
HMGN3	-0.273699	6.56457e-25	2.21318e-20	0.697	0.664	Malignant cells	PR vs. PD
XRCC6	-0.273825	9.54223e-28	3.21707e-23	0.569	0.613	Malignant cells	PR vs. PD
POLD4	-0.27396	1.7352e-31	5.85005e-27	0.559	0.586	Malignant cells	PR vs. PD
NKX2-1	-0.274223	1.89757e-62	6.39746e-58	0.244	0.394	Malignant cells	PR vs. PD
AP2S1	-0.275308	4.56947e-28	1.54055e-23	0.645	0.647	Malignant cells	PR vs. PD
VMP1	-0.275888	7.15376e-09	0.000241182	0.582	0.561	Malignant cells	PR vs. PD
GSR	-0.275944	3.79651e-89	1.27995e-84	0.139	0.289	Malignant cells	PR vs. PD
TPMT	-0.276012	1.28248e-126	4.32375e-122	0.194	0.402	Malignant cells	PR vs. PD
ISCA2	-0.276232	4.55512e-93	1.53571e-88	0.259	0.445	Malignant cells	PR vs. PD
TFPI	-0.276425	5.96033e-92	2.00946e-87	0.13	0.283	Malignant cells	PR vs. PD
MRPS18B	-0.276453	1.3022e-39	4.39022e-35	0.504	0.569	Malignant cells	PR vs. PD
PGP	-0.276524	1.11394e-42	3.75553e-38	0.375	0.476	Malignant cells	PR vs. PD
AP1S1	-0.276751	6.12116e-14	2.06369e-09	0.492	0.527	Malignant cells	PR vs. PD
KLF5	-0.278536	1.46848e-90	4.95083e-86	0.283	0.493	Malignant cells	PR vs. PD
UBE2C	-0.278572	6.83977e-51	2.30596e-46	0.141	0.26	Malignant cells	PR vs. PD
PUF60	-0.278695	6.18556e-49	2.0854e-44	0.437	0.563	Malignant cells	PR vs. PD
UBE2V1	-0.279355	8.33243e-12	2.80919e-07	0.622	0.604	Malignant cells	PR vs. PD
CYCS	-0.280738	3.18224e-10	1.07286e-05	0.75	0.688	Malignant cells	PR vs. PD
CBR1	-0.280786	1.67419e-51	5.64438e-47	0.355	0.484	Malignant cells	PR vs. PD
ZSCAN16-AS1	-0.281299	2.70129e-134	9.10715e-130	0.154	0.352	Malignant cells	PR vs. PD
TK1	-0.282127	1.29044e-51	4.35058e-47	0.15	0.273	Malignant cells	PR vs. PD
HMGN2	-0.282358	6.96479e-12	2.34811e-07	0.818	0.741	Malignant cells	PR vs. PD
EIF2S2	-0.28435	1.07026e-19	3.60829e-15	0.688	0.655	Malignant cells	PR vs. PD
CCDC167	-0.284815	7.03519e-106	2.37184e-101	0.289	0.49	Malignant cells	PR vs. PD
RTRAF	-0.285166	4.07956e-10	1.37538e-05	0.766	0.696	Malignant cells	PR vs. PD
BST2	-0.286011	5.75496e-285	1.94023e-280	0.173	0.545	Malignant cells	PR vs. PD
SAP18	-0.286317	1.16216e-30	3.9181e-26	0.742	0.698	Malignant cells	PR vs. PD
TPD52	-0.286411	3.29882e-08	0.00111216	0.381	0.42	Malignant cells	PR vs. PD
WDR66	-0.286428	4.91073e-166	1.6556e-161	0.08	0.274	Malignant cells	PR vs. PD
ARPC3	-0.286625	7.45461e-25	2.51325e-20	0.864	0.79	Malignant cells	PR vs. PD
DAP	-0.287194	8.52842e-80	2.87527e-75	0.34	0.516	Malignant cells	PR vs. PD
MYLIP	-0.287598	3.59435e-80	1.2118e-75	0.258	0.43	Malignant cells	PR vs. PD
FHL2	-0.287616	2.06566e-129	6.96415e-125	0.081	0.252	Malignant cells	PR vs. PD
COPS6	-0.287647	6.39581e-22	2.15628e-17	0.531	0.584	Malignant cells	PR vs. PD
PSMB10	-0.287806	1.32691e-20	4.47355e-16	0.389	0.448	Malignant cells	PR vs. PD
PLSCR1	-0.287885	1.1027e-121	3.71764e-117	0.227	0.45	Malignant cells	PR vs. PD
AGTRAP	-0.288223	6.62971e-51	2.23514e-46	0.375	0.474	Malignant cells	PR vs. PD
TMEM120B	-0.288375	2.74487e-86	9.25405e-82	0.15	0.299	Malignant cells	PR vs. PD
CISD3	-0.288454	2.06926e-07	0.0069763	0.442	0.466	Malignant cells	PR vs. PD
MRPS17	-0.288511	2.91055e-43	9.81263e-39	0.361	0.475	Malignant cells	PR vs. PD
CNN3	-0.288563	4.56273e-123	1.53828e-118	0.19	0.411	Malignant cells	PR vs. PD
MTX1	-0.288877	5.22007e-111	1.75989e-106	0.307	0.495	Malignant cells	PR vs. PD
MZT2B	-0.288992	2.51962e-27	8.49465e-23	0.776	0.716	Malignant cells	PR vs. PD
CBX1	-0.289035	6.2793e-81	2.117e-76	0.287	0.455	Malignant cells	PR vs. PD
MRPL33	-0.289069	1.57068e-52	5.2954e-48	0.587	0.643	Malignant cells	PR vs. PD
LSM8	-0.28912	1.50695e-29	5.08053e-25	0.544	0.592	Malignant cells	PR vs. PD
MAGED2	-0.289273	4.63416e-83	1.56236e-78	0.295	0.482	Malignant cells	PR vs. PD
ARF5	-0.289275	3.64544e-79	1.22902e-74	0.354	0.559	Malignant cells	PR vs. PD
LMAN2	-0.289444	6.27301e-27	2.11488e-22	0.591	0.604	Malignant cells	PR vs. PD
MPC1	-0.28981	1.65623e-39	5.58383e-35	0.335	0.441	Malignant cells	PR vs. PD
MALSU1	-0.291818	4.44008e-73	1.49693e-68	0.367	0.53	Malignant cells	PR vs. PD
HSPE1	-0.291936	3.48015e-38	1.1733e-33	0.867	0.806	Malignant cells	PR vs. PD
C4orf3	-0.292474	3.68365e-27	1.24191e-22	0.68	0.671	Malignant cells	PR vs. PD
NDUFC1	-0.292617	1.51991e-14	5.12422e-10	0.641	0.631	Malignant cells	PR vs. PD
MRPS14	-0.292625	9.95344e-71	3.3557e-66	0.318	0.471	Malignant cells	PR vs. PD
HTATIP2	-0.292818	5.23504e-84	1.76494e-79	0.297	0.47	Malignant cells	PR vs. PD
APOL2	-0.293064	6.08884e-116	2.05279e-111	0.109	0.276	Malignant cells	PR vs. PD
TFRC	-0.293222	1.57737e-85	5.31793e-81	0.226	0.387	Malignant cells	PR vs. PD
NDUFS8	-0.293367	1.27215e-19	4.28892e-15	0.716	0.676	Malignant cells	PR vs. PD
PRPF6	-0.293446	1.5715e-18	5.29815e-14	0.435	0.509	Malignant cells	PR vs. PD
SLIRP	-0.293574	2.75018e-09	9.27195e-05	0.705	0.642	Malignant cells	PR vs. PD
SUB1	-0.293712	7.79547e-26	2.62816e-21	0.837	0.76	Malignant cells	PR vs. PD
PRKAR1A	-0.293841	8.76795e-38	2.95603e-33	0.41	0.512	Malignant cells	PR vs. PD
PTS	-0.29443	3.18158e-56	1.07264e-51	0.338	0.47	Malignant cells	PR vs. PD
RPL7L1	-0.294806	8.82795e-54	2.97626e-49	0.47	0.569	Malignant cells	PR vs. PD
PSMC6	-0.295285	7.15204e-48	2.41124e-43	0.404	0.539	Malignant cells	PR vs. PD
ABCF1	-0.295733	2.67979e-109	9.03464e-105	0.332	0.529	Malignant cells	PR vs. PD
SRP54	-0.296056	6.89754e-118	2.32544e-113	0.251	0.473	Malignant cells	PR vs. PD
ATP5MC1	-0.296355	7.58131e-16	2.55596e-11	0.743	0.694	Malignant cells	PR vs. PD
C18orf32	-0.296463	1.46902e-35	4.95266e-31	0.557	0.596	Malignant cells	PR vs. PD
LDOC1	-0.296786	6.52364e-87	2.19938e-82	0.134	0.285	Malignant cells	PR vs. PD
KRT10	-0.297424	2.32584e-07	0.00784133	0.713	0.654	Malignant cells	PR vs. PD
DRAP1	-0.297707	2.12247e-48	7.1557e-44	0.49	0.597	Malignant cells	PR vs. PD
ASRGL1	-0.297836	2.77724e-100	9.36319e-96	0.167	0.339	Malignant cells	PR vs. PD
JPT1	-0.298397	6.94075e-12	2.34001e-07	0.767	0.702	Malignant cells	PR vs. PD
MRPL28	-0.29863	8.37827e-45	2.82465e-40	0.366	0.488	Malignant cells	PR vs. PD
SERPINH1	-0.299259	4.33927e-48	1.46294e-43	0.294	0.427	Malignant cells	PR vs. PD
LAMTOR5	-0.299708	9.30273e-44	3.13632e-39	0.701	0.681	Malignant cells	PR vs. PD
MPLKIP	-0.300665	1.10795e-64	3.73535e-60	0.419	0.545	Malignant cells	PR vs. PD
HSPB11	-0.301711	4.86378e-51	1.63977e-46	0.332	0.47	Malignant cells	PR vs. PD
STK17A	-0.302507	7.19893e-110	2.42705e-105	0.246	0.446	Malignant cells	PR vs. PD
PSMA2	-0.303279	9.16184e-18	3.08882e-13	0.733	0.684	Malignant cells	PR vs. PD
SSR1	-0.303562	1.08384e-64	3.65406e-60	0.423	0.54	Malignant cells	PR vs. PD
ABHD17C	-0.303624	1.49673e-97	5.04606e-93	0.144	0.304	Malignant cells	PR vs. PD
HEBP2	-0.303728	8.32478e-44	2.80662e-39	0.458	0.545	Malignant cells	PR vs. PD
ACTR10	-0.303981	4.1096e-89	1.38551e-84	0.271	0.457	Malignant cells	PR vs. PD
GID8	-0.304071	1.08924e-49	3.67226e-45	0.344	0.468	Malignant cells	PR vs. PD
MFSD12	-0.304319	1.69897e-48	5.72791e-44	0.181	0.286	Malignant cells	PR vs. PD
NAXE	-0.304441	5.5809e-24	1.88155e-19	0.608	0.599	Malignant cells	PR vs. PD
MRPL9	-0.304729	6.71848e-42	2.26507e-37	0.461	0.539	Malignant cells	PR vs. PD
HLA-A	-0.304737	4.84202e-20	1.63244e-15	0.823	0.762	Malignant cells	PR vs. PD
PITPNC1	-0.30517	4.295e-176	1.44802e-171	0.065	0.252	Malignant cells	PR vs. PD
AZIN1	-0.305399	3.73925e-50	1.26065e-45	0.35	0.472	Malignant cells	PR vs. PD
TMED9	-0.305938	1.01147e-56	3.41008e-52	0.54	0.616	Malignant cells	PR vs. PD
DUXAP8	-0.30627	1.26348e-210	4.25971e-206	0.101	0.342	Malignant cells	PR vs. PD
HLA-C	-0.306571	9.404e-72	3.17046e-67	0.781	0.773	Malignant cells	PR vs. PD
KRT19	-0.306643	7.45085e-10	2.51198e-05	0.765	0.694	Malignant cells	PR vs. PD
GALNT2	-0.307361	1.34177e-240	4.52366e-236	0.143	0.415	Malignant cells	PR vs. PD
RBX1	-0.307389	2.83175e-48	9.54695e-44	0.643	0.672	Malignant cells	PR vs. PD
MRPL52	-0.308044	7.91081e-41	2.66705e-36	0.601	0.626	Malignant cells	PR vs. PD
SMIM26	-0.308176	3.36316e-30	1.13386e-25	0.655	0.631	Malignant cells	PR vs. PD
PAPOLA	-0.308339	1.55444e-46	5.24066e-42	0.549	0.594	Malignant cells	PR vs. PD
PLIN3	-0.30964	1.59023e-110	5.3613e-106	0.215	0.415	Malignant cells	PR vs. PD
UQCRQ	-0.309743	2.62354e-46	8.84502e-42	0.827	0.769	Malignant cells	PR vs. PD
TMEM208	-0.309913	6.14232e-40	2.07082e-35	0.471	0.54	Malignant cells	PR vs. PD
CAP1	-0.310001	4.2079e-81	1.41865e-76	0.441	0.597	Malignant cells	PR vs. PD
PSMA5	-0.310241	4.73626e-23	1.59678e-18	0.591	0.603	Malignant cells	PR vs. PD
NDUFB6	-0.310525	1.44402e-52	4.86838e-48	0.417	0.552	Malignant cells	PR vs. PD
AK1	-0.310709	4.16506e-57	1.40421e-52	0.349	0.469	Malignant cells	PR vs. PD
ATP1A1	-0.31073	1.73823e-53	5.86026e-49	0.471	0.57	Malignant cells	PR vs. PD
IFI35	-0.311216	1.27225e-78	4.28925e-74	0.206	0.369	Malignant cells	PR vs. PD
UBA1	-0.31134	1.83477e-21	6.18573e-17	0.289	0.393	Malignant cells	PR vs. PD
SCOC	-0.311788	5.52741e-59	1.86351e-54	0.356	0.489	Malignant cells	PR vs. PD
IL13RA1	-0.311801	1.2957e-174	4.36832e-170	0.185	0.432	Malignant cells	PR vs. PD
PLAAT3	-0.312062	2.64143e-138	8.90531e-134	0.312	0.594	Malignant cells	PR vs. PD
PMVK	-0.312084	3.83948e-42	1.29444e-37	0.477	0.544	Malignant cells	PR vs. PD
SDHC	-0.312312	3.55449e-39	1.19836e-34	0.55	0.61	Malignant cells	PR vs. PD
PSMB4	-0.312574	5.75466e-24	1.94013e-19	0.594	0.606	Malignant cells	PR vs. PD
C11orf58	-0.31285	3.80615e-29	1.28321e-24	0.621	0.637	Malignant cells	PR vs. PD
UBE2A	-0.312856	2.23383e-80	7.53114e-76	0.34	0.514	Malignant cells	PR vs. PD
NAA20	-0.313001	4.16815e-34	1.40525e-29	0.502	0.569	Malignant cells	PR vs. PD
ANAPC16	-0.313115	1.12772e-32	3.802e-28	0.668	0.644	Malignant cells	PR vs. PD
SRPK1	-0.313383	2.63435e-63	8.88144e-59	0.378	0.509	Malignant cells	PR vs. PD
G6PD	-0.31368	8.52395e-95	2.87377e-90	0.21	0.385	Malignant cells	PR vs. PD
VMA21	-0.31375	3.63052e-83	1.22399e-78	0.334	0.489	Malignant cells	PR vs. PD
RDX	-0.313922	4.79421e-127	1.61632e-122	0.291	0.53	Malignant cells	PR vs. PD
CD55	-0.314288	2.1057e-85	7.09914e-81	0.436	0.605	Malignant cells	PR vs. PD
SERP1	-0.314675	7.4798e-15	2.52174e-10	0.853	0.753	Malignant cells	PR vs. PD
CALCOCO2	-0.314739	2.70457e-138	9.1182e-134	0.257	0.48	Malignant cells	PR vs. PD
EGFR	-0.315038	5.59068e-119	1.88484e-114	0.146	0.336	Malignant cells	PR vs. PD
RHOB	-0.316525	2.2498e-18	7.58497e-14	0.495	0.523	Malignant cells	PR vs. PD
PSMC3	-0.316702	1.53251e-31	5.16671e-27	0.393	0.496	Malignant cells	PR vs. PD
RAC3	-0.316703	1.18116e-43	3.98216e-39	0.176	0.271	Malignant cells	PR vs. PD
HPRT1	-0.316968	1.9597e-46	6.60694e-42	0.306	0.428	Malignant cells	PR vs. PD
C11orf54	-0.316972	9.06195e-109	3.05514e-104	0.146	0.321	Malignant cells	PR vs. PD
C1orf43	-0.31727	1.04579e-33	3.52578e-29	0.744	0.673	Malignant cells	PR vs. PD
SSR3	-0.317626	8.13333e-56	2.74207e-51	0.628	0.643	Malignant cells	PR vs. PD
PSMB1	-0.317651	7.84398e-25	2.64452e-20	0.74	0.688	Malignant cells	PR vs. PD
NEU1	-0.317656	6.43193e-75	2.16846e-70	0.329	0.481	Malignant cells	PR vs. PD
MT1X	-0.317662	2.56806e-32	8.65794e-28	0.231	0.338	Malignant cells	PR vs. PD
ACTG1	-0.317982	1.34737e-130	4.54252e-126	0.935	0.91	Malignant cells	PR vs. PD
SRP9	-0.318904	5.1048e-54	1.72103e-49	0.636	0.672	Malignant cells	PR vs. PD
MARCKSL1	-0.319701	2.13306e-27	7.19139e-23	0.546	0.602	Malignant cells	PR vs. PD
ANXA7	-0.320279	7.20383e-61	2.4287e-56	0.382	0.528	Malignant cells	PR vs. PD
BCL7C	-0.320546	6.8184e-77	2.29876e-72	0.341	0.509	Malignant cells	PR vs. PD
PPP1CA	-0.320607	9.47399e-66	3.19406e-61	0.574	0.654	Malignant cells	PR vs. PD
PFN1	-0.320836	9.23583e-51	3.11377e-46	0.9	0.823	Malignant cells	PR vs. PD
MORF4L2	-0.321234	3.64335e-39	1.22832e-34	0.526	0.601	Malignant cells	PR vs. PD
SUMO1	-0.322485	1.33588e-53	4.50378e-49	0.641	0.667	Malignant cells	PR vs. PD
EIF2S1	-0.322507	1.76595e-94	5.95373e-90	0.288	0.474	Malignant cells	PR vs. PD
ZDHHC9	-0.322544	1.34154e-121	4.52287e-117	0.176	0.371	Malignant cells	PR vs. PD
VBP1	-0.322605	1.80017e-56	6.0691e-52	0.37	0.51	Malignant cells	PR vs. PD
DPY30	-0.323095	2.37533e-74	8.0082e-70	0.526	0.642	Malignant cells	PR vs. PD
AGPAT2	-0.32403	4.31326e-88	1.45417e-83	0.318	0.496	Malignant cells	PR vs. PD
EIF5A	-0.324265	5.15865e-97	1.73919e-92	0.458	0.62	Malignant cells	PR vs. PD
LGALS1	-0.325001	3.37413e-58	1.13755e-53	0.254	0.388	Malignant cells	PR vs. PD
RNF181	-0.325788	3.13396e-26	1.05658e-21	0.583	0.621	Malignant cells	PR vs. PD
MBIP	-0.3262	4.40895e-108	1.48643e-103	0.237	0.448	Malignant cells	PR vs. PD
PRSS8	-0.326271	7.5288e-61	2.53826e-56	0.313	0.444	Malignant cells	PR vs. PD
WDR34	-0.326379	3.06001e-86	1.03165e-81	0.283	0.473	Malignant cells	PR vs. PD
TMEM238	-0.326422	1.68426e-107	5.67831e-103	0.164	0.36	Malignant cells	PR vs. PD
CXCL17	-0.327729	6.74705e-37	2.2747e-32	0.174	0.276	Malignant cells	PR vs. PD
PYCR1	-0.327872	1.53036e-30	5.15946e-26	0.39	0.477	Malignant cells	PR vs. PD
UBE2V2	-0.329616	5.24274e-61	1.76754e-56	0.36	0.5	Malignant cells	PR vs. PD
RIT1	-0.330521	5.92989e-218	1.9992e-213	0.126	0.377	Malignant cells	PR vs. PD
ATP6V1C1	-0.330597	6.04046e-78	2.03648e-73	0.252	0.414	Malignant cells	PR vs. PD
SLC2A4RG	-0.330641	4.38362e-117	1.47789e-112	0.246	0.45	Malignant cells	PR vs. PD
RTF2	-0.330784	8.35908e-60	2.81818e-55	0.398	0.538	Malignant cells	PR vs. PD
MT-ND2	-0.330941	1.57098e-15	5.29642e-11	0.869	0.817	Malignant cells	PR vs. PD
RBM3	-0.33096	2.65904e-88	8.96469e-84	0.793	0.66	Malignant cells	PR vs. PD
TAX1BP1	-0.331032	3.41601e-63	1.15167e-58	0.582	0.666	Malignant cells	PR vs. PD
GLRX3	-0.331074	2.96452e-40	9.99458e-36	0.453	0.543	Malignant cells	PR vs. PD
CLTB	-0.331267	3.36708e-49	1.13518e-44	0.455	0.55	Malignant cells	PR vs. PD
PRELID3B	-0.331699	1.22745e-46	4.13823e-42	0.396	0.51	Malignant cells	PR vs. PD
ASS1	-0.331834	5.14833e-69	1.73571e-64	0.177	0.316	Malignant cells	PR vs. PD
MRPS10	-0.332023	8.94341e-125	3.01518e-120	0.305	0.515	Malignant cells	PR vs. PD
RBCK1	-0.332971	6.22348e-39	2.09818e-34	0.568	0.59	Malignant cells	PR vs. PD
MRPS18A	-0.333127	1.72982e-62	5.83192e-58	0.376	0.502	Malignant cells	PR vs. PD
CKS2	-0.333529	6.55094e-09	0.000220858	0.505	0.518	Malignant cells	PR vs. PD
PLP2	-0.333539	8.76928e-24	2.95647e-19	0.699	0.529	Malignant cells	PR vs. PD
UBE2H	-0.333602	3.70565e-112	1.24932e-107	0.291	0.498	Malignant cells	PR vs. PD
ABHD11	-0.33382	1.53566e-41	5.17733e-37	0.313	0.427	Malignant cells	PR vs. PD
PGAM1	-0.334769	6.57802e-19	2.21772e-14	0.56	0.594	Malignant cells	PR vs. PD
SAT1	-0.334834	4.19514e-81	1.41435e-76	0.681	0.728	Malignant cells	PR vs. PD
GMNN	-0.335128	4.54597e-92	1.53263e-87	0.209	0.385	Malignant cells	PR vs. PD
ATP5MD	-0.335534	3.16277e-50	1.0663e-45	0.812	0.758	Malignant cells	PR vs. PD
LRRC59	-0.335561	2.77535e-40	9.35681e-36	0.481	0.566	Malignant cells	PR vs. PD
PQBP1	-0.335866	4.64721e-16	1.56676e-11	0.538	0.456	Malignant cells	PR vs. PD
TMEM160	-0.335876	2.54572e-68	8.58265e-64	0.439	0.556	Malignant cells	PR vs. PD
TOB1	-0.33591	1.03178e-19	3.47853e-15	0.471	0.502	Malignant cells	PR vs. PD
FMO5	-0.336067	1.16434e-207	3.92547e-203	0.052	0.253	Malignant cells	PR vs. PD
WDR45B	-0.336157	7.35097e-55	2.47831e-50	0.396	0.517	Malignant cells	PR vs. PD
ACP1	-0.336555	5.47038e-46	1.84429e-41	0.605	0.647	Malignant cells	PR vs. PD
RHOV	-0.339028	6.82686e-18	2.30161e-13	0.251	0.31	Malignant cells	PR vs. PD
UQCRB	-0.339631	2.23741e-36	7.54319e-32	0.862	0.833	Malignant cells	PR vs. PD
PPIA	-0.340189	2.5386e-46	8.55864e-42	0.937	0.889	Malignant cells	PR vs. PD
NDUFV2	-0.340244	2.17834e-28	7.34406e-24	0.642	0.63	Malignant cells	PR vs. PD
MT-ND4	-0.34061	1.76679e-18	5.95656e-14	0.861	0.818	Malignant cells	PR vs. PD
IDS	-0.341405	1.69039e-51	5.69898e-47	0.343	0.485	Malignant cells	PR vs. PD
PSMB2	-0.341604	5.96561e-46	2.01125e-41	0.601	0.65	Malignant cells	PR vs. PD
EMC2	-0.341744	3.72732e-97	1.25663e-92	0.272	0.464	Malignant cells	PR vs. PD
MRPL27	-0.341975	2.5308e-45	8.53233e-41	0.523	0.579	Malignant cells	PR vs. PD
NOL7	-0.342067	2.17485e-58	7.3323e-54	0.606	0.635	Malignant cells	PR vs. PD
YIF1A	-0.342519	3.43848e-63	1.15925e-58	0.498	0.582	Malignant cells	PR vs. PD
DNAJC15	-0.343388	5.92557e-232	1.99775e-227	0.22	0.543	Malignant cells	PR vs. PD
CTSL	-0.343601	5.61211e-111	1.89207e-106	0.179	0.364	Malignant cells	PR vs. PD
MGLL	-0.345023	0	0	0.121	0.47	Malignant cells	PR vs. PD
SLC50A1	-0.345027	7.35761e-174	2.48054e-169	0.25	0.498	Malignant cells	PR vs. PD
ADAR	-0.347747	3.92059e-84	1.32179e-79	0.407	0.553	Malignant cells	PR vs. PD
PCLAF	-0.348147	2.33846e-34	7.88389e-30	0.188	0.284	Malignant cells	PR vs. PD
DUT	-0.348405	7.89147e-17	2.66053e-12	0.556	0.572	Malignant cells	PR vs. PD
CDK2AP2	-0.348621	1.73449e-86	5.84766e-82	0.412	0.558	Malignant cells	PR vs. PD
COX7B	-0.348999	1.99836e-20	6.73728e-16	0.814	0.737	Malignant cells	PR vs. PD
IER5L	-0.350072	1.08057e-156	3.64305e-152	0.125	0.327	Malignant cells	PR vs. PD
SRXN1	-0.350074	2.17534e-138	7.33393e-134	0.111	0.291	Malignant cells	PR vs. PD
BET1	-0.351221	1.1138e-122	3.75507e-118	0.243	0.45	Malignant cells	PR vs. PD
ERGIC1	-0.351318	4.08104e-93	1.37588e-88	0.296	0.461	Malignant cells	PR vs. PD
HDGF	-0.351603	6.44012e-97	2.17122e-92	0.434	0.583	Malignant cells	PR vs. PD
RPL36AL	-0.351743	8.92688e-68	3.00961e-63	0.86	0.829	Malignant cells	PR vs. PD
EID1	-0.351874	3.74074e-42	1.26115e-37	0.589	0.627	Malignant cells	PR vs. PD
SF3B4	-0.352345	1.28454e-165	4.33069e-161	0.282	0.535	Malignant cells	PR vs. PD
MRPL55	-0.352395	5.16961e-36	1.74288e-31	0.537	0.586	Malignant cells	PR vs. PD
ZNHIT1	-0.352705	1.3689e-44	4.61511e-40	0.632	0.653	Malignant cells	PR vs. PD
TMEM59	-0.353037	2.27361e-67	7.66524e-63	0.665	0.68	Malignant cells	PR vs. PD
ELOC	-0.353444	2.19081e-09	7.38609e-05	0.697	0.659	Malignant cells	PR vs. PD
CD2AP	-0.353876	9.30166e-150	3.13596e-145	0.305	0.536	Malignant cells	PR vs. PD
NELFE	-0.354112	2.45215e-90	8.26719e-86	0.464	0.6	Malignant cells	PR vs. PD
EPHX1	-0.3548	5.3384e-139	1.79979e-134	0.19	0.407	Malignant cells	PR vs. PD
ST6GALNAC1	-0.354836	8.83025e-115	2.97703e-110	0.176	0.359	Malignant cells	PR vs. PD
NDUFS6	-0.355997	1.88889e-52	6.3682e-48	0.74	0.718	Malignant cells	PR vs. PD
C14orf119	-0.35622	1.30187e-131	4.38912e-127	0.277	0.5	Malignant cells	PR vs. PD
TMED10	-0.356464	8.97783e-59	3.02679e-54	0.607	0.619	Malignant cells	PR vs. PD
SNX6	-0.356485	8.56617e-93	2.888e-88	0.363	0.55	Malignant cells	PR vs. PD
COPA	-0.356849	1.37909e-131	4.64945e-127	0.311	0.522	Malignant cells	PR vs. PD
ECHS1	-0.357585	1.66852e-39	5.62524e-35	0.556	0.597	Malignant cells	PR vs. PD
MT-ND4L	-0.358248	1.43032e-94	4.82217e-90	0.44	0.58	Malignant cells	PR vs. PD
TPD52L2	-0.358261	4.8042e-85	1.61969e-80	0.29	0.476	Malignant cells	PR vs. PD
OST4	-0.359651	1.35573e-49	4.5707e-45	0.874	0.805	Malignant cells	PR vs. PD
NME1	-0.359763	7.64958e-11	2.57898e-06	0.718	0.671	Malignant cells	PR vs. PD
POLE4	-0.359869	1.34591e-25	4.53761e-21	0.474	0.523	Malignant cells	PR vs. PD
ETFB	-0.360844	1.03051e-64	3.47425e-60	0.509	0.611	Malignant cells	PR vs. PD
SCP2	-0.361027	2.63084e-59	8.86961e-55	0.511	0.614	Malignant cells	PR vs. PD
SLC39A1	-0.361637	7.27413e-107	2.4524e-102	0.362	0.52	Malignant cells	PR vs. PD
CALM3	-0.361736	1.58293e-67	5.3367e-63	0.527	0.616	Malignant cells	PR vs. PD
YWHAH	-0.361931	8.64652e-87	2.91509e-82	0.393	0.559	Malignant cells	PR vs. PD
TOP1	-0.361933	2.87801e-90	9.70293e-86	0.477	0.608	Malignant cells	PR vs. PD
CALM1	-0.362129	8.19341e-84	2.76233e-79	0.704	0.734	Malignant cells	PR vs. PD
CBX3	-0.362429	4.48636e-69	1.51253e-64	0.57	0.639	Malignant cells	PR vs. PD
MAP3K13	-0.362494	1.08203e-67	3.64795e-63	0.47	0.592	Malignant cells	PR vs. PD
TSC22D3	-0.363242	2.74799e-70	9.26459e-66	0.333	0.473	Malignant cells	PR vs. PD
IFITM2	-0.363437	2.58898e-48	8.72848e-44	0.288	0.42	Malignant cells	PR vs. PD
SYAP1	-0.36368	3.25185e-88	1.09633e-83	0.334	0.489	Malignant cells	PR vs. PD
IDH3G	-0.365142	2.51069e-74	8.46455e-70	0.403	0.539	Malignant cells	PR vs. PD
CHCHD1	-0.366081	1.09911e-64	3.70553e-60	0.447	0.567	Malignant cells	PR vs. PD
EZR	-0.366747	8.54964e-91	2.88243e-86	0.536	0.666	Malignant cells	PR vs. PD
METTL26	-0.36677	2.25333e-36	7.59688e-32	0.652	0.649	Malignant cells	PR vs. PD
HNRNPA2B1	-0.366773	2.08991e-66	7.04592e-62	0.825	0.79	Malignant cells	PR vs. PD
ID4	-0.366946	1.37362e-158	4.63102e-154	0.115	0.334	Malignant cells	PR vs. PD
ATOX1	-0.368011	4.5485e-18	1.53348e-13	0.583	0.602	Malignant cells	PR vs. PD
HMGB3	-0.368701	5.57656e-38	1.88008e-33	0.422	0.507	Malignant cells	PR vs. PD
IER3IP1	-0.370156	1.5555e-68	5.24421e-64	0.448	0.558	Malignant cells	PR vs. PD
FAM3C	-0.370288	1.0437e-113	3.51873e-109	0.299	0.508	Malignant cells	PR vs. PD
TMSB4X	-0.370318	5.74593e-67	1.93718e-62	0.969	0.843	Malignant cells	PR vs. PD
ALDOA	-0.370744	3.75285e-29	1.26524e-24	0.311	0.431	Malignant cells	PR vs. PD
PFN2	-0.371153	1.61104e-80	5.43145e-76	0.29	0.446	Malignant cells	PR vs. PD
EAPP	-0.371609	3.87955e-109	1.30795e-104	0.327	0.526	Malignant cells	PR vs. PD
NDUFA3	-0.372001	2.42551e-64	8.17735e-60	0.559	0.635	Malignant cells	PR vs. PD
SUMO2	-0.372147	1.50697e-57	5.08059e-53	0.885	0.831	Malignant cells	PR vs. PD
PRDX3	-0.372668	2.29792e-74	7.74722e-70	0.474	0.586	Malignant cells	PR vs. PD
MRPL50	-0.37285	2.00162e-80	6.74825e-76	0.27	0.432	Malignant cells	PR vs. PD
DDAH2	-0.373067	4.03542e-154	1.3605e-149	0.255	0.526	Malignant cells	PR vs. PD
ARF1	-0.373526	3.51313e-94	1.18442e-89	0.713	0.739	Malignant cells	PR vs. PD
HILPDA	-0.374105	1.44295e-59	4.86477e-55	0.196	0.339	Malignant cells	PR vs. PD
GBP2	-0.374365	3.17505e-111	1.07044e-106	0.108	0.269	Malignant cells	PR vs. PD
NDUFC2	-0.374851	3.74953e-57	1.26412e-52	0.757	0.716	Malignant cells	PR vs. PD
PGD	-0.375104	2.00763e-29	6.76851e-25	0.426	0.499	Malignant cells	PR vs. PD
HSPA1B	-0.375556	7.14973e-131	2.41046e-126	0.293	0.531	Malignant cells	PR vs. PD
NR4A2	-0.375575	1.27414e-07	0.00429563	0.332	0.347	Malignant cells	PR vs. PD
CDC42	-0.376413	2.75307e-98	9.2817e-94	0.593	0.69	Malignant cells	PR vs. PD
CALU	-0.37649	6.83956e-95	2.30589e-90	0.337	0.524	Malignant cells	PR vs. PD
NR4A1	-0.376616	1.99155e-07	0.00671432	0.451	0.439	Malignant cells	PR vs. PD
MEA1	-0.376752	1.35278e-82	4.56076e-78	0.457	0.598	Malignant cells	PR vs. PD
PTP4A2	-0.377024	1.9006e-68	6.40768e-64	0.54	0.615	Malignant cells	PR vs. PD
ARPC5L	-0.377266	8.34748e-72	2.81427e-67	0.455	0.576	Malignant cells	PR vs. PD
MAP1LC3B	-0.377582	4.87325e-46	1.64297e-41	0.477	0.563	Malignant cells	PR vs. PD
ANAPC11	-0.377804	6.57088e-51	2.21531e-46	0.788	0.745	Malignant cells	PR vs. PD
CCT6A	-0.377814	1.36434e-19	4.59974e-15	0.657	0.637	Malignant cells	PR vs. PD
RPP21	-0.377918	1.87354e-82	6.31647e-78	0.506	0.613	Malignant cells	PR vs. PD
LRP10	-0.378554	3.1059e-168	1.04712e-163	0.309	0.544	Malignant cells	PR vs. PD
TMBIM4	-0.379038	7.13762e-61	2.40638e-56	0.564	0.611	Malignant cells	PR vs. PD
GHITM	-0.379307	7.26468e-34	2.44921e-29	0.613	0.621	Malignant cells	PR vs. PD
FBP1	-0.380492	5.33294e-15	1.79795e-10	0.345	0.381	Malignant cells	PR vs. PD
SNRPG	-0.381193	2.51309e-63	8.47265e-59	0.721	0.725	Malignant cells	PR vs. PD
MB	-0.381805	2.88125e-144	9.71383e-140	0.084	0.257	Malignant cells	PR vs. PD
C8orf33	-0.381926	7.07562e-107	2.38547e-102	0.25	0.433	Malignant cells	PR vs. PD
GPSM3	-0.382126	1.42366e-255	4.79974e-251	0.064	0.303	Malignant cells	PR vs. PD
MCM3	-0.382178	2.32092e-84	7.82475e-80	0.192	0.352	Malignant cells	PR vs. PD
FAM50A	-0.382905	1.41377e-141	4.76638e-137	0.326	0.568	Malignant cells	PR vs. PD
POLR2J	-0.382986	5.95538e-49	2.0078e-44	0.615	0.629	Malignant cells	PR vs. PD
PSMA4	-0.385193	2.52466e-56	8.51163e-52	0.547	0.63	Malignant cells	PR vs. PD
GOLM1	-0.386848	6.53399e-175	2.20287e-170	0.273	0.538	Malignant cells	PR vs. PD
BRI3	-0.387098	5.63718e-29	1.90052e-24	0.72	0.666	Malignant cells	PR vs. PD
GABARAPL1	-0.388373	1.67174e-31	5.63611e-27	0.234	0.309	Malignant cells	PR vs. PD
YWHAB	-0.388458	1.97956e-98	6.67388e-94	0.671	0.71	Malignant cells	PR vs. PD
CENPX	-0.389821	1.42977e-19	4.82034e-15	0.569	0.585	Malignant cells	PR vs. PD
TUBA4A	-0.389914	4.36246e-81	1.47076e-76	0.243	0.406	Malignant cells	PR vs. PD
PSMC1	-0.39025	3.26324e-84	1.10017e-79	0.395	0.545	Malignant cells	PR vs. PD
SEPTIN7	-0.391881	3.4993e-80	1.17976e-75	0.439	0.597	Malignant cells	PR vs. PD
FLOT1	-0.392251	4.20196e-119	1.41665e-114	0.452	0.618	Malignant cells	PR vs. PD
CHMP4A	-0.394025	2.07174e-98	6.98465e-94	0.422	0.566	Malignant cells	PR vs. PD
CNIH4	-0.394327	1.94821e-37	6.56821e-33	0.555	0.597	Malignant cells	PR vs. PD
METTL9	-0.394715	1.50794e-12	5.08388e-08	0.63	0.602	Malignant cells	PR vs. PD
ATP5PD	-0.395143	1.60708e-55	5.41813e-51	0.765	0.734	Malignant cells	PR vs. PD
PHLDA2	-0.397097	4.97898e-30	1.67861e-25	0.533	0.575	Malignant cells	PR vs. PD
ARPC5	-0.397525	3.1806e-94	1.07231e-89	0.493	0.646	Malignant cells	PR vs. PD
TMEM14C	-0.400196	1.74645e-54	5.88797e-50	0.707	0.666	Malignant cells	PR vs. PD
METRN	-0.400861	8.89278e-276	2.99811e-271	0.158	0.487	Malignant cells	PR vs. PD
QPRT	-0.402117	1.55574e-64	5.24504e-60	0.218	0.342	Malignant cells	PR vs. PD
UPP1	-0.402553	1.62793e-182	5.48841e-178	0.18	0.422	Malignant cells	PR vs. PD
GCLM	-0.402564	2.67887e-148	9.03156e-144	0.167	0.385	Malignant cells	PR vs. PD
MT-CO3	-0.40326	2.82431e-27	9.52187e-23	0.881	0.862	Malignant cells	PR vs. PD
APLP2	-0.403272	2.69305e-94	9.07936e-90	0.461	0.629	Malignant cells	PR vs. PD
ERRFI1	-0.404101	4.59685e-133	1.54978e-128	0.263	0.492	Malignant cells	PR vs. PD
SERPINB1	-0.40445	8.03885e-11	2.71022e-06	0.627	0.607	Malignant cells	PR vs. PD
ACOT13	-0.405067	3.53397e-81	1.19144e-76	0.39	0.525	Malignant cells	PR vs. PD
GGCT	-0.406231	8.67699e-20	2.92536e-15	0.532	0.551	Malignant cells	PR vs. PD
PSMB8	-0.406291	1.16403e-24	3.92441e-20	0.577	0.58	Malignant cells	PR vs. PD
FAM83A	-0.406385	1.12097e-199	3.77924e-195	0.114	0.357	Malignant cells	PR vs. PD
FAM177A1	-0.406906	2.3042e-102	7.76837e-98	0.428	0.595	Malignant cells	PR vs. PD
MCTS1	-0.407225	3.28174e-56	1.1064e-51	0.468	0.568	Malignant cells	PR vs. PD
PHB	-0.407549	6.11312e-44	2.06098e-39	0.681	0.666	Malignant cells	PR vs. PD
CYTOR	-0.408035	1.25703e-191	4.23795e-187	0.218	0.477	Malignant cells	PR vs. PD
HIST1H1C	-0.408693	3.95698e-99	1.33406e-94	0.527	0.66	Malignant cells	PR vs. PD
ANXA11	-0.409726	3.17145e-144	1.06922e-139	0.444	0.645	Malignant cells	PR vs. PD
CFL1	-0.40984	1.96065e-121	6.61015e-117	0.918	0.865	Malignant cells	PR vs. PD
ARF4	-0.410588	2.72639e-108	9.19174e-104	0.503	0.646	Malignant cells	PR vs. PD
HSP90AB1	-0.412614	1.93816e-163	6.53431e-159	0.946	0.908	Malignant cells	PR vs. PD
ILF2	-0.413437	6.55402e-92	2.20962e-87	0.552	0.648	Malignant cells	PR vs. PD
CSNK2B	-0.414101	3.14347e-79	1.05979e-74	0.698	0.704	Malignant cells	PR vs. PD
CCT3	-0.414193	5.18358e-31	1.74759e-26	0.743	0.712	Malignant cells	PR vs. PD
NDUFB8	-0.414498	1.7137e-79	5.77757e-75	0.68	0.683	Malignant cells	PR vs. PD
WARS	-0.414634	5.29904e-50	1.78652e-45	0.24	0.37	Malignant cells	PR vs. PD
SQSTM1	-0.414886	1.76703e-31	5.95738e-27	0.722	0.702	Malignant cells	PR vs. PD
HAX1	-0.415581	1.00799e-87	3.39833e-83	0.547	0.611	Malignant cells	PR vs. PD
SNRPB	-0.417994	6.57259e-54	2.21588e-49	0.708	0.707	Malignant cells	PR vs. PD
ATP6V0B	-0.419205	1.19534e-72	4.02996e-68	0.661	0.665	Malignant cells	PR vs. PD
CERS2	-0.419791	1.39692e-188	4.70958e-184	0.274	0.517	Malignant cells	PR vs. PD
UQCC2	-0.419898	4.06201e-46	1.36947e-41	0.57	0.615	Malignant cells	PR vs. PD
NDUFA5	-0.420199	7.15152e-85	2.41106e-80	0.491	0.602	Malignant cells	PR vs. PD
NDUFAB1	-0.422099	2.63425e-83	8.88111e-79	0.704	0.7	Malignant cells	PR vs. PD
ISG20	-0.422349	4.34747e-28	1.46571e-23	0.358	0.432	Malignant cells	PR vs. PD
RPA3	-0.423599	1.35428e-77	4.56583e-73	0.469	0.602	Malignant cells	PR vs. PD
PFDN2	-0.424291	4.66235e-82	1.57187e-77	0.652	0.679	Malignant cells	PR vs. PD
UBE2L3	-0.425617	9.10876e-78	3.07093e-73	0.565	0.638	Malignant cells	PR vs. PD
RNF5	-0.426389	1.19427e-69	4.02636e-65	0.408	0.545	Malignant cells	PR vs. PD
LSM5	-0.427137	1.95365e-51	6.58655e-47	0.659	0.656	Malignant cells	PR vs. PD
SSR2	-0.428572	1.92801e-31	6.50008e-27	0.797	0.699	Malignant cells	PR vs. PD
PSMD4	-0.429913	6.75738e-99	2.27818e-94	0.589	0.669	Malignant cells	PR vs. PD
C12orf75	-0.430423	3.59164e-147	1.21089e-142	0.083	0.268	Malignant cells	PR vs. PD
ABCC3	-0.431386	0	0	0.093	0.454	Malignant cells	PR vs. PD
SERF2	-0.432092	4.46528e-259	1.50542e-254	0.934	0.926	Malignant cells	PR vs. PD
ENSA	-0.432344	4.31399e-77	1.45442e-72	0.704	0.689	Malignant cells	PR vs. PD
ARL6IP1	-0.43335	7.71163e-92	2.5999e-87	0.505	0.622	Malignant cells	PR vs. PD
MRPL13	-0.433683	1.31968e-68	4.44918e-64	0.375	0.52	Malignant cells	PR vs. PD
FAM107B	-0.433755	1.04555e-191	3.52498e-187	0.232	0.478	Malignant cells	PR vs. PD
JTB	-0.434312	1.0837e-114	3.65359e-110	0.775	0.736	Malignant cells	PR vs. PD
GSTP1	-0.43488	2.75705e-141	9.29513e-137	0.951	0.928	Malignant cells	PR vs. PD
MPC2	-0.435034	1.97459e-80	6.65714e-76	0.601	0.656	Malignant cells	PR vs. PD
MAPK1IP1L	-0.435358	1.36152e-150	4.59023e-146	0.332	0.54	Malignant cells	PR vs. PD
FDX1	-0.435462	3.1218e-156	1.05248e-151	0.317	0.542	Malignant cells	PR vs. PD
ACTB	-0.437013	4.37607e-189	1.47535e-184	0.981	0.958	Malignant cells	PR vs. PD
ALDH2	-0.438438	2.10736e-114	7.10477e-110	0.306	0.497	Malignant cells	PR vs. PD
C19orf33	-0.439918	6.8812e-190	2.31993e-185	0.355	0.71	Malignant cells	PR vs. PD
TSC22D1	-0.441099	7.94942e-103	2.68007e-98	0.372	0.536	Malignant cells	PR vs. PD
SEC62	-0.442237	5.42012e-90	1.82734e-85	0.558	0.646	Malignant cells	PR vs. PD
NDUFS5	-0.443638	2.53732e-126	8.55433e-122	0.853	0.82	Malignant cells	PR vs. PD
CAPZA2	-0.443896	5.44262e-157	1.83493e-152	0.379	0.598	Malignant cells	PR vs. PD
SMIM14	-0.445087	4.08399e-151	1.37688e-146	0.273	0.504	Malignant cells	PR vs. PD
DNPH1	-0.445865	1.06993e-64	3.60717e-60	0.619	0.636	Malignant cells	PR vs. PD
DUSP4	-0.445869	1.44475e-166	4.87082e-162	0.118	0.322	Malignant cells	PR vs. PD
PCNA	-0.446588	1.53946e-103	5.19012e-99	0.229	0.424	Malignant cells	PR vs. PD
CMPK1	-0.447077	2.22903e-128	7.51496e-124	0.394	0.579	Malignant cells	PR vs. PD
RNASEH2C	-0.447087	6.69964e-104	2.25872e-99	0.405	0.554	Malignant cells	PR vs. PD
BTG1	-0.44717	2.2532e-19	7.59645e-15	0.737	0.659	Malignant cells	PR vs. PD
CCT5	-0.448685	9.46848e-60	3.1922e-55	0.584	0.65	Malignant cells	PR vs. PD
TMEM230	-0.452321	4.66755e-128	1.57362e-123	0.484	0.615	Malignant cells	PR vs. PD
FAM49B	-0.452481	6.55228e-132	2.20904e-127	0.334	0.535	Malignant cells	PR vs. PD
EIF4A3	-0.452665	7.97317e-78	2.68808e-73	0.366	0.504	Malignant cells	PR vs. PD
HNRNPK	-0.452706	2.7876e-119	9.3981e-115	0.7	0.741	Malignant cells	PR vs. PD
UBC	-0.453037	8.78071e-138	2.96033e-133	0.925	0.892	Malignant cells	PR vs. PD
MRPS21	-0.454344	8.39107e-99	2.82897e-94	0.753	0.724	Malignant cells	PR vs. PD
VIM	-0.455157	1.98849e-52	6.70401e-48	0.175	0.299	Malignant cells	PR vs. PD
BZW1	-0.455375	7.74937e-108	2.61262e-103	0.419	0.587	Malignant cells	PR vs. PD
NDUFA1	-0.455696	1.78487e-101	6.0175e-97	0.744	0.735	Malignant cells	PR vs. PD
MCL1	-0.456955	1.21649e-46	4.10126e-42	0.617	0.624	Malignant cells	PR vs. PD
DPM3	-0.458264	2.86161e-145	9.64765e-141	0.328	0.532	Malignant cells	PR vs. PD
TMBIM6	-0.45874	1.8897e-99	6.37093e-95	0.802	0.742	Malignant cells	PR vs. PD
BNIP3	-0.459446	1.8872e-30	6.36252e-26	0.6	0.595	Malignant cells	PR vs. PD
H2AFV	-0.46196	1.41917e-98	4.78459e-94	0.53	0.658	Malignant cells	PR vs. PD
SCD	-0.462423	1.70632e-77	5.75268e-73	0.283	0.424	Malignant cells	PR vs. PD
MT-CO1	-0.466118	1.36109e-40	4.58879e-36	0.906	0.876	Malignant cells	PR vs. PD
MTRNR2L12	-0.467995	5.8277e-35	1.96475e-30	0.258	0.397	Malignant cells	PR vs. PD
CKS1B	-0.469198	1.65335e-80	5.57411e-76	0.445	0.588	Malignant cells	PR vs. PD
POLR2L	-0.470217	6.20885e-94	2.09325e-89	0.756	0.744	Malignant cells	PR vs. PD
UQCR10	-0.471563	2.22304e-128	7.49475e-124	0.84	0.808	Malignant cells	PR vs. PD
COA3	-0.472389	1.30344e-62	4.39443e-58	0.523	0.61	Malignant cells	PR vs. PD
GLO1	-0.473841	2.33836e-103	7.88356e-99	0.453	0.6	Malignant cells	PR vs. PD
SPCS2	-0.476193	7.93331e-155	2.67464e-150	0.522	0.661	Malignant cells	PR vs. PD
DYNLT1	-0.476511	2.30152e-159	7.75935e-155	0.467	0.656	Malignant cells	PR vs. PD
CCND3	-0.476704	3.50558e-108	1.18187e-103	0.329	0.494	Malignant cells	PR vs. PD
CMBL	-0.478066	2.47891e-76	8.3574e-72	0.272	0.401	Malignant cells	PR vs. PD
ROMO1	-0.479062	3.28718e-94	1.10824e-89	0.626	0.693	Malignant cells	PR vs. PD
NANS	-0.479631	1.03849e-68	3.50116e-64	0.407	0.53	Malignant cells	PR vs. PD
BLVRB	-0.480191	9.15959e-98	3.08806e-93	0.492	0.63	Malignant cells	PR vs. PD
APH1A	-0.480445	1.02626e-102	3.45995e-98	0.489	0.6	Malignant cells	PR vs. PD
TPM3	-0.480731	6.55106e-147	2.20862e-142	0.592	0.721	Malignant cells	PR vs. PD
CHURC1	-0.480885	2.49375e-142	8.40743e-138	0.519	0.63	Malignant cells	PR vs. PD
PFDN6	-0.482503	4.28269e-133	1.44387e-128	0.399	0.584	Malignant cells	PR vs. PD
PRR15L	-0.482601	2.80341e-184	9.4514e-180	0.12	0.337	Malignant cells	PR vs. PD
MAL2	-0.483697	1.35361e-149	4.56355e-145	0.375	0.583	Malignant cells	PR vs. PD
STMP1	-0.485328	2.39353e-130	8.06954e-126	0.443	0.605	Malignant cells	PR vs. PD
C6orf62	-0.485638	4.10414e-136	1.38367e-131	0.36	0.538	Malignant cells	PR vs. PD
LY6K	-0.486454	1.256e-245	4.23448e-241	0.06	0.287	Malignant cells	PR vs. PD
DBI	-0.487093	1.99452e-101	6.72431e-97	0.656	0.71	Malignant cells	PR vs. PD
HMGB2	-0.489405	1.06846e-09	3.60221e-05	0.456	0.485	Malignant cells	PR vs. PD
SLC39A4	-0.492626	8.87667e-147	2.99268e-142	0.343	0.54	Malignant cells	PR vs. PD
MT-CYB	-0.494803	1.59885e-37	5.39037e-33	0.876	0.805	Malignant cells	PR vs. PD
LAGE3	-0.494973	2.02105e-94	6.81378e-90	0.488	0.605	Malignant cells	PR vs. PD
SNRPC	-0.495884	1.7754e-119	5.98558e-115	0.591	0.685	Malignant cells	PR vs. PD
MYL12A	-0.496955	8.02323e-114	2.70495e-109	0.723	0.752	Malignant cells	PR vs. PD
DDT	-0.497339	6.03629e-100	2.03508e-95	0.747	0.708	Malignant cells	PR vs. PD
RHOF	-0.497362	4.8041e-194	1.61965e-189	0.141	0.378	Malignant cells	PR vs. PD
RPS27	-0.49871	3.72751e-199	1.25669e-194	0.967	0.981	Malignant cells	PR vs. PD
NUCKS1	-0.500148	1.45448e-106	4.90363e-102	0.651	0.706	Malignant cells	PR vs. PD
ANP32E	-0.501213	1.7183e-172	5.79306e-168	0.25	0.484	Malignant cells	PR vs. PD
EGLN3	-0.503384	0	0	0.038	0.287	Malignant cells	PR vs. PD
PSMB5	-0.50401	1.34427e-98	4.53206e-94	0.68	0.691	Malignant cells	PR vs. PD
LACTB2	-0.505674	2.76397e-111	9.31846e-107	0.228	0.419	Malignant cells	PR vs. PD
HIST1H2BD	-0.506886	4.40621e-137	1.48551e-132	0.253	0.457	Malignant cells	PR vs. PD
BCAP31	-0.507007	3.07766e-118	1.0376e-113	0.619	0.658	Malignant cells	PR vs. PD
DYNLRB1	-0.509824	2.45214e-114	8.26715e-110	0.531	0.617	Malignant cells	PR vs. PD
DCXR	-0.511571	1.45417e-67	4.9026e-63	0.555	0.619	Malignant cells	PR vs. PD
LAPTM4B	-0.514026	1.47377e-155	4.96867e-151	0.241	0.476	Malignant cells	PR vs. PD
YWHAZ	-0.514557	3.77865e-85	1.27393e-80	0.768	0.746	Malignant cells	PR vs. PD
NDUFB11	-0.516554	2.556e-16	8.61731e-12	0.799	0.743	Malignant cells	PR vs. PD
CARHSP1	-0.519709	1.57854e-176	5.32189e-172	0.313	0.559	Malignant cells	PR vs. PD
SRI	-0.519883	2.75791e-197	9.29801e-193	0.445	0.671	Malignant cells	PR vs. PD
ATP5MF	-0.520545	3.02057e-175	1.01835e-170	0.759	0.785	Malignant cells	PR vs. PD
PMF1	-0.521343	2.62708e-199	8.85692e-195	0.316	0.561	Malignant cells	PR vs. PD
PKM	-0.522654	2.65771e-64	8.9602e-60	0.777	0.742	Malignant cells	PR vs. PD
ASPH	-0.524128	1.02335e-282	3.45011e-278	0.146	0.476	Malignant cells	PR vs. PD
FASN	-0.524152	7.43925e-29	2.50807e-24	0.334	0.406	Malignant cells	PR vs. PD
TXN	-0.524538	5.74209e-82	1.93589e-77	0.892	0.851	Malignant cells	PR vs. PD
RAMP1	-0.524641	6.04635e-195	2.03847e-190	0.105	0.334	Malignant cells	PR vs. PD
RBM8A	-0.525369	2.38168e-140	8.02959e-136	0.654	0.701	Malignant cells	PR vs. PD
FKBP3	-0.525649	2.22258e-137	7.49319e-133	0.389	0.582	Malignant cells	PR vs. PD
FIS1	-0.532296	7.34445e-161	2.47611e-156	0.585	0.679	Malignant cells	PR vs. PD
NDUFB1	-0.532963	3.60496e-101	1.21537e-96	0.595	0.649	Malignant cells	PR vs. PD
FBXO2	-0.533881	2.82816e-243	9.53485e-239	0.085	0.33	Malignant cells	PR vs. PD
KRT7	-0.535326	8.78661e-185	2.96232e-180	0.319	0.628	Malignant cells	PR vs. PD
HIST1H4H	-0.5357	1.22299e-206	4.12319e-202	0.119	0.358	Malignant cells	PR vs. PD
COX16	-0.537326	9.4581e-131	3.1887e-126	0.521	0.632	Malignant cells	PR vs. PD
PGRMC1	-0.537708	3.7029e-185	1.2484e-180	0.344	0.569	Malignant cells	PR vs. PD
PSME1	-0.540242	1.11514e-74	3.75957e-70	0.706	0.703	Malignant cells	PR vs. PD
SNRPB2	-0.541019	1.45334e-154	4.8998e-150	0.444	0.611	Malignant cells	PR vs. PD
MT-ND3	-0.541101	7.74781e-51	2.6121e-46	0.837	0.749	Malignant cells	PR vs. PD
IFITM3	-0.542539	4.06523e-146	1.37055e-141	0.62	0.737	Malignant cells	PR vs. PD
TPM1	-0.543206	3.77253e-163	1.27187e-158	0.32	0.574	Malignant cells	PR vs. PD
TMCO1	-0.543295	1.59029e-141	5.36151e-137	0.477	0.612	Malignant cells	PR vs. PD
HES1	-0.548853	3.48601e-43	1.17527e-38	0.45	0.512	Malignant cells	PR vs. PD
MIF	-0.548897	3.02772e-289	1.02077e-284	0.945	0.941	Malignant cells	PR vs. PD
S100A14	-0.549119	9.80939e-203	3.30714e-198	0.283	0.569	Malignant cells	PR vs. PD
POMP	-0.549197	5.47941e-100	1.84733e-95	0.731	0.717	Malignant cells	PR vs. PD
HLA-B	-0.549673	7.80203e-24	2.63038e-19	0.828	0.756	Malignant cells	PR vs. PD
TDP2	-0.549997	2.32483e-210	7.83792e-206	0.172	0.421	Malignant cells	PR vs. PD
FDPS	-0.552473	1.15981e-129	3.91018e-125	0.458	0.606	Malignant cells	PR vs. PD
MGST3	-0.552945	3.3009e-91	1.11287e-86	0.513	0.632	Malignant cells	PR vs. PD
SSBP1	-0.55344	2.33639e-110	7.8769e-106	0.679	0.707	Malignant cells	PR vs. PD
MYL6	-0.555036	2.04811e-285	6.905e-281	0.922	0.917	Malignant cells	PR vs. PD
HMGB1	-0.558499	2.25112e-131	7.58941e-127	0.843	0.823	Malignant cells	PR vs. PD
DUSP1	-0.558996	9.35799e-81	3.15495e-76	0.645	0.666	Malignant cells	PR vs. PD
SQOR	-0.559269	1.37287e-156	4.6285e-152	0.196	0.409	Malignant cells	PR vs. PD
TMEM14B	-0.560325	1.82886e-152	6.16581e-148	0.618	0.691	Malignant cells	PR vs. PD
VAMP5	-0.561138	3.37871e-121	1.1391e-116	0.157	0.333	Malignant cells	PR vs. PD
CST3	-0.561655	3.02e-139	1.01816e-134	0.79	0.721	Malignant cells	PR vs. PD
RHEB	-0.563059	2.33092e-127	7.85847e-123	0.623	0.695	Malignant cells	PR vs. PD
NME4	-0.563216	2.54849e-151	8.59196e-147	0.421	0.602	Malignant cells	PR vs. PD
TKT	-0.564104	9.12778e-73	3.07734e-68	0.765	0.745	Malignant cells	PR vs. PD
CIB1	-0.566485	6.51436e-136	2.19625e-131	0.54	0.673	Malignant cells	PR vs. PD
PSMB9	-0.569896	2.07e-58	6.97878e-54	0.4	0.501	Malignant cells	PR vs. PD
PSMA7	-0.571996	1.36573e-182	4.60441e-178	0.811	0.804	Malignant cells	PR vs. PD
NDUFB2	-0.573401	1.72543e-173	5.8171e-169	0.763	0.778	Malignant cells	PR vs. PD
LMNA	-0.577712	1.91838e-170	6.46762e-166	0.688	0.752	Malignant cells	PR vs. PD
HIST1H4C	-0.57922	4.59732e-67	1.54994e-62	0.418	0.531	Malignant cells	PR vs. PD
SEM1	-0.58151	4.7435e-205	1.59922e-200	0.778	0.793	Malignant cells	PR vs. PD
TMEM141	-0.581878	5.61576e-113	1.8933e-108	0.519	0.605	Malignant cells	PR vs. PD
MT-CO2	-0.58361	1.50793e-67	5.08383e-63	0.905	0.883	Malignant cells	PR vs. PD
TNFRSF12A	-0.583987	3.06764e-125	1.03423e-120	0.391	0.555	Malignant cells	PR vs. PD
FOS	-0.590503	8.47477e-58	2.85718e-53	0.774	0.713	Malignant cells	PR vs. PD
LCN2	-0.593961	2.93281e-74	9.88766e-70	0.116	0.256	Malignant cells	PR vs. PD
TESC	-0.596175	4.32249e-166	1.45729e-161	0.11	0.312	Malignant cells	PR vs. PD
CETN2	-0.596471	2.92239e-127	9.85253e-123	0.33	0.54	Malignant cells	PR vs. PD
TRAM1	-0.596931	5.50814e-79	1.85701e-74	0.387	0.547	Malignant cells	PR vs. PD
SIVA1	-0.599165	1.52319e-158	5.13527e-154	0.58	0.672	Malignant cells	PR vs. PD
TOMM6	-0.601048	2.07598e-223	6.99896e-219	0.835	0.808	Malignant cells	PR vs. PD
GUK1	-0.604531	1.97386e-202	6.65468e-198	0.821	0.795	Malignant cells	PR vs. PD
ERO1A	-0.60544	3.07948e-121	1.03822e-116	0.263	0.475	Malignant cells	PR vs. PD
SELENBP1	-0.608305	1.53026e-225	5.15911e-221	0.136	0.391	Malignant cells	PR vs. PD
IL32	-0.613792	6.76333e-98	2.28019e-93	0.179	0.359	Malignant cells	PR vs. PD
DAD1	-0.614034	7.73823e-201	2.60887e-196	0.626	0.721	Malignant cells	PR vs. PD
PFKP	-0.616352	3.08164e-76	1.03894e-71	0.286	0.404	Malignant cells	PR vs. PD
PSMA6	-0.616796	6.85214e-148	2.31013e-143	0.681	0.755	Malignant cells	PR vs. PD
GPR160	-0.617181	4.05472e-246	1.36701e-241	0.145	0.404	Malignant cells	PR vs. PD
HSP90AA1	-0.622765	4.24068e-190	1.4297e-185	0.907	0.878	Malignant cells	PR vs. PD
ANXA5	-0.624429	1.07699e-196	3.63097e-192	0.317	0.588	Malignant cells	PR vs. PD
COX7A2	-0.626942	1.71155e-106	5.77031e-102	0.836	0.818	Malignant cells	PR vs. PD
TIMM17B	-0.629583	1.26067e-08	0.000425024	0.474	0.525	Malignant cells	PR vs. PD
PSMA3	-0.633833	1.83288e-124	6.17937e-120	0.555	0.648	Malignant cells	PR vs. PD
LAMTOR2	-0.636653	3.37824e-236	1.13894e-231	0.472	0.668	Malignant cells	PR vs. PD
MDK	-0.640855	2.45446e-16	8.27496e-12	0.738	0.603	Malignant cells	PR vs. PD
MRPL14	-0.642873	3.38245e-118	1.14036e-113	0.687	0.71	Malignant cells	PR vs. PD
ATP5F1E	-0.64548	6.86741e-269	2.31528e-264	0.912	0.915	Malignant cells	PR vs. PD
FTH1	-0.647858	2.86694e-176	9.6656e-172	0.984	0.978	Malignant cells	PR vs. PD
ENY2	-0.650932	4.1175e-172	1.38817e-167	0.594	0.699	Malignant cells	PR vs. PD
ARPC1B	-0.653349	1.87259e-185	6.31323e-181	0.655	0.749	Malignant cells	PR vs. PD
UGDH	-0.66081	1.39109e-163	4.68993e-159	0.258	0.465	Malignant cells	PR vs. PD
POLR2K	-0.665908	6.41578e-194	2.16301e-189	0.543	0.687	Malignant cells	PR vs. PD
ENO1	-0.66628	7.37512e-256	2.48645e-251	0.85	0.884	Malignant cells	PR vs. PD
PRDX1	-0.667318	1.79589e-257	6.05466e-253	0.755	0.869	Malignant cells	PR vs. PD
MT-ND5	-0.668307	5.20106e-81	1.75349e-76	0.814	0.691	Malignant cells	PR vs. PD
GPX2	-0.668775	2.21383e-139	7.46372e-135	0.081	0.254	Malignant cells	PR vs. PD
SMIM22	-0.668937	4.72657e-161	1.59352e-156	0.493	0.616	Malignant cells	PR vs. PD
SFTA3	-0.672644	1.90378e-134	6.41839e-130	0.217	0.412	Malignant cells	PR vs. PD
ERH	-0.677501	6.43802e-190	2.17051e-185	0.71	0.763	Malignant cells	PR vs. PD
ADGRF5	-0.677747	5.12574e-151	1.72809e-146	0.109	0.297	Malignant cells	PR vs. PD
GNAS	-0.679219	3.3135e-229	1.11711e-224	0.707	0.788	Malignant cells	PR vs. PD
CLIC1	-0.681094	0	0	0.81	0.85	Malignant cells	PR vs. PD
NEDD8	-0.684287	3.55794e-232	1.19952e-227	0.758	0.772	Malignant cells	PR vs. PD
CHCHD2	-0.684739	0	0	0.876	0.888	Malignant cells	PR vs. PD
CLDN3	-0.695867	8.85618e-137	2.98577e-132	0.344	0.561	Malignant cells	PR vs. PD
SSR4	-0.707488	3.98656e-276	1.34403e-271	0.823	0.797	Malignant cells	PR vs. PD
APOL1	-0.717748	2.06942e-176	6.97683e-172	0.108	0.313	Malignant cells	PR vs. PD
PSMB3	-0.731814	3.67428e-71	1.23875e-66	0.694	0.717	Malignant cells	PR vs. PD
DEK	-0.733336	2.46588e-204	8.31345e-200	0.546	0.71	Malignant cells	PR vs. PD
CEBPB	-0.736425	7.7772e-234	2.62201e-229	0.379	0.62	Malignant cells	PR vs. PD
OAS1	-0.739961	1.2491e-111	4.21123e-107	0.236	0.397	Malignant cells	PR vs. PD
ZNF706	-0.744969	4.54978e-95	1.53391e-90	0.586	0.661	Malignant cells	PR vs. PD
RAB5IF	-0.745735	9.81835e-211	3.31016e-206	0.609	0.709	Malignant cells	PR vs. PD
KRTCAP2	-0.749908	1.63467e-264	5.51111e-260	0.711	0.76	Malignant cells	PR vs. PD
EFNA1	-0.750429	1.98695e-222	6.69881e-218	0.282	0.529	Malignant cells	PR vs. PD
SEC61B	-0.750952	2.88112e-215	9.71341e-211	0.756	0.772	Malignant cells	PR vs. PD
PPDPF	-0.752278	1.77436e-126	5.98209e-122	0.88	0.837	Malignant cells	PR vs. PD
COX6C	-0.75499	2.06475e-303	6.96108e-299	0.871	0.863	Malignant cells	PR vs. PD
CYB5A	-0.76959	4.14034e-71	1.39587e-66	0.763	0.714	Malignant cells	PR vs. PD
PTGR1	-0.787249	7.49935e-218	2.52833e-213	0.209	0.462	Malignant cells	PR vs. PD
LDHA	-0.80239	6.42282e-171	2.16539e-166	0.751	0.794	Malignant cells	PR vs. PD
S100A10	-0.805049	0	0	0.404	0.918	Malignant cells	PR vs. PD
ELF3	-0.81718	4.03057e-198	1.35887e-193	0.5	0.681	Malignant cells	PR vs. PD
AQP5	-0.817674	7.50557e-278	2.53043e-273	0.037	0.266	Malignant cells	PR vs. PD
PSME2	-0.819786	5.72876e-192	1.93139e-187	0.575	0.719	Malignant cells	PR vs. PD
PHPT1	-0.822546	0	0	0.516	0.713	Malignant cells	PR vs. PD
DSTN	-0.823473	0	0	0.732	0.815	Malignant cells	PR vs. PD
LGALS3	-0.837034	1.84566e-190	6.22247e-186	0.77	0.808	Malignant cells	PR vs. PD
SPTSSA	-0.853129	2.26927e-258	7.65063e-254	0.379	0.647	Malignant cells	PR vs. PD
S100A13	-0.860704	3.36262e-244	1.13367e-239	0.559	0.69	Malignant cells	PR vs. PD
ATP1B1	-0.871649	7.19148e-103	2.42454e-98	0.494	0.594	Malignant cells	PR vs. PD
CP	-0.881556	0	0	0.022	0.291	Malignant cells	PR vs. PD
IFI27	-0.89417	7.97658e-151	2.68922e-146	0.303	0.543	Malignant cells	PR vs. PD
ISG15	-0.8953	4.89007e-137	1.64864e-132	0.414	0.615	Malignant cells	PR vs. PD
S100A11	-0.897016	0	0	0.465	0.928	Malignant cells	PR vs. PD
IER3	-0.911507	1.61023e-157	5.42874e-153	0.507	0.616	Malignant cells	PR vs. PD
NQO1	-0.91789	0	0	0.181	0.565	Malignant cells	PR vs. PD
TAGLN2	-0.921282	0	0	0.734	0.878	Malignant cells	PR vs. PD
MT-ATP6	-0.930568	2.65662e-147	8.95653e-143	0.876	0.838	Malignant cells	PR vs. PD
CRIP1	-0.951254	6.99655e-119	2.35882e-114	0.486	0.659	Malignant cells	PR vs. PD
GLRX	-0.967318	5.52267e-138	1.86191e-133	0.255	0.434	Malignant cells	PR vs. PD
SLPI	-0.981451	2.737e-69	9.22751e-65	0.481	0.536	Malignant cells	PR vs. PD
CYBA	-1.00742	6.93664e-101	2.33862e-96	0.718	0.7	Malignant cells	PR vs. PD
NDRG1	-1.01036	1.73864e-281	5.86165e-277	0.175	0.489	Malignant cells	PR vs. PD
TXNRD1	-1.01419	2.17497e-50	7.33269e-46	0.374	0.456	Malignant cells	PR vs. PD
SFTA2	-1.03762	0	0	0.169	0.576	Malignant cells	PR vs. PD
PGK1	-1.05792	2.66663e-209	8.99028e-205	0.668	0.75	Malignant cells	PR vs. PD
SRGN	-1.08071	0	0	0.057	0.352	Malignant cells	PR vs. PD
S100A16	-1.08998	0	0	0.333	0.676	Malignant cells	PR vs. PD
S100A6	-1.11443	0	0	0.934	0.969	Malignant cells	PR vs. PD
AKR1C3	-1.12167	4.92071e-224	1.65897e-219	0.099	0.332	Malignant cells	PR vs. PD
MALL	-1.13825	0	0	0.11	0.433	Malignant cells	PR vs. PD
FTL	-1.15368	0	0	0.978	0.981	Malignant cells	PR vs. PD
TM4SF1	-1.22101	0	0	0.206	0.7	Malignant cells	PR vs. PD
SOD2	-1.23338	2.2252e-166	7.50203e-162	0.364	0.562	Malignant cells	PR vs. PD
NPC2	-1.2349	5.31178e-10	1.79081e-05	0.766	0.659	Malignant cells	PR vs. PD
S100A4	-1.30633	4.66143e-240	1.57155e-235	0.24	0.523	Malignant cells	PR vs. PD
MUC1	-1.32914	0	0	0.194	0.646	Malignant cells	PR vs. PD
CRABP2	-1.36138	2.57822e-186	8.6922e-182	0.114	0.322	Malignant cells	PR vs. PD
NNMT	-1.54001	5.65673e-302	1.90711e-297	0.027	0.256	Malignant cells	PR vs. PD
PCSK1N	-1.66834	0	0	0.043	0.316	Malignant cells	PR vs. PD
SPP1	-1.67855	0	0	0.017	0.283	Malignant cells	PR vs. PD
S100P	-1.74538	0	0	0.175	0.679	Malignant cells	PR vs. PD
HSPA1A	-1.78449	0	0	0.219	0.691	Malignant cells	PR vs. PD
SEC61G	-1.82636	0	0	0.724	0.808	Malignant cells	PR vs. PD
SCGB3A1	-3.29552	0	0	0.035	0.287	Malignant cells	PR vs. PD
S100A9	-3.60519	0	0	0.099	0.406	Malignant cells	PR vs. PD

## Sheet: PR vs. SD
Table S3. List of DEGs in comparison between ICI response groups.
gene	avg_logFC	p_val	p_val_adj	pct.1	pct.2	celltype	group
RPL13A	2.3819	0	0	0.963	0.844	Malignant cells	PR vs. SD
RPL27A	2.13791	0	0	0.932	0.789	Malignant cells	PR vs. SD
RPS10	1.9105	0	0	0.828	0.44	Malignant cells	PR vs. SD
RPS17	1.89206	0	0	0.907	0.761	Malignant cells	PR vs. SD
LYZ	1.85869	0	0	0.548	0.058	Malignant cells	PR vs. SD
RPS20	1.80703	0	0	0.908	0.704	Malignant cells	PR vs. SD
MALAT1	1.73506	0	0	0.922	0.714	Malignant cells	PR vs. SD
RPL21	1.72715	0	0	0.944	0.836	Malignant cells	PR vs. SD
SNHG5	1.71194	0	0	0.774	0.374	Malignant cells	PR vs. SD
RPS4Y1	1.60885	0	0	0.787	0.145	Malignant cells	PR vs. SD
RPS18	1.56549	0	0	0.983	0.953	Malignant cells	PR vs. SD
RPS2	1.56361	0	0	0.967	0.893	Malignant cells	PR vs. SD
GAS5	1.50928	0	0	0.85	0.666	Malignant cells	PR vs. SD
RPS11	1.50588	0	0	0.923	0.775	Malignant cells	PR vs. SD
EEF1G	1.41415	0	0	0.933	0.779	Malignant cells	PR vs. SD
RPL7	1.35558	0	0	0.94	0.83	Malignant cells	PR vs. SD
SNHG29	1.32431	0	0	0.877	0.733	Malignant cells	PR vs. SD
CEACAM6	1.25688	6.74279e-199	2.27327e-194	0.429	0.069	Malignant cells	PR vs. SD
RPL23	1.24353	0	0	0.898	0.803	Malignant cells	PR vs. SD
RPL24	1.20407	0	0	0.959	0.849	Malignant cells	PR vs. SD
SLC25A6	1.20152	3.99151e-257	1.3457e-252	0.853	0.74	Malignant cells	PR vs. SD
SNHG32	1.17832	0	0	0.771	0.371	Malignant cells	PR vs. SD
RPL23A	1.15922	0	0	0.956	0.899	Malignant cells	PR vs. SD
RPL10A	1.15306	0	0	0.951	0.864	Malignant cells	PR vs. SD
RPS14	1.13452	0	0	0.973	0.924	Malignant cells	PR vs. SD
RPL3	1.11361	1.73927e-303	5.86378e-299	0.957	0.913	Malignant cells	PR vs. SD
RPLP2	1.09462	0	0	0.953	0.895	Malignant cells	PR vs. SD
RPL9	1.09413	3.15497e-294	1.06367e-289	0.93	0.873	Malignant cells	PR vs. SD
RPL15	1.09389	0	0	0.956	0.898	Malignant cells	PR vs. SD
RACK1	1.08893	0	0	0.938	0.842	Malignant cells	PR vs. SD
LPCAT1	1.08554	6.19563e-75	2.08879e-70	0.28	0.107	Malignant cells	PR vs. SD
ZFAS1	1.07791	0	0	0.878	0.714	Malignant cells	PR vs. SD
RPL17	1.07305	5.85144e-283	1.97275e-278	0.945	0.873	Malignant cells	PR vs. SD
MT3	1.05721	0	0	0.461	0.011	Malignant cells	PR vs. SD
RPS9	1.05199	0	0	0.951	0.885	Malignant cells	PR vs. SD
RPL31	1.04528	2.29133e-304	7.72498e-300	0.917	0.842	Malignant cells	PR vs. SD
RPL13	1.04344	0	0	0.989	0.957	Malignant cells	PR vs. SD
RPS29	1.0405	0	0	0.914	0.787	Malignant cells	PR vs. SD
RPS6	1.03765	0	0	0.975	0.928	Malignant cells	PR vs. SD
RPSA	1.02937	0	0	0.938	0.811	Malignant cells	PR vs. SD
RPL37A	1.01975	0	0	0.943	0.861	Malignant cells	PR vs. SD
RPL14	0.984017	0	0	0.947	0.878	Malignant cells	PR vs. SD
RPS25	0.946093	0	0	0.965	0.88	Malignant cells	PR vs. SD
RPS3A	0.940204	0	0	0.966	0.91	Malignant cells	PR vs. SD
NOP53	0.918041	0	0	0.808	0.527	Malignant cells	PR vs. SD
RPL5	0.904205	0	0	0.937	0.871	Malignant cells	PR vs. SD
RPL11	0.857858	0	0	0.974	0.942	Malignant cells	PR vs. SD
RPL19	0.857824	7.18237e-185	2.42146e-180	0.965	0.962	Malignant cells	PR vs. SD
RPL34	0.856807	0	0	0.958	0.923	Malignant cells	PR vs. SD
RPS3	0.847601	0	0	0.975	0.919	Malignant cells	PR vs. SD
RPL18	0.83921	0	0	0.959	0.904	Malignant cells	PR vs. SD
EEF1B2	0.833703	0	0	0.897	0.77	Malignant cells	PR vs. SD
RPS23	0.813783	0	0	0.967	0.925	Malignant cells	PR vs. SD
RPL4	0.799232	2.19691e-271	7.40667e-267	0.92	0.846	Malignant cells	PR vs. SD
RPL29	0.796519	9.25158e-279	3.11908e-274	0.954	0.926	Malignant cells	PR vs. SD
RPS5	0.795312	0	0	0.957	0.893	Malignant cells	PR vs. SD
RPL27	0.793599	2.66424e-268	8.98222e-264	0.931	0.852	Malignant cells	PR vs. SD
HIST1H1C	0.78369	2.21538e-36	7.46892e-32	0.527	0.399	Malignant cells	PR vs. SD
RPL32	0.770173	0	0	0.974	0.947	Malignant cells	PR vs. SD
RPL6	0.767817	1.24686e-289	4.20365e-285	0.952	0.907	Malignant cells	PR vs. SD
SNHG8	0.762518	3.48593e-207	1.17525e-202	0.765	0.561	Malignant cells	PR vs. SD
RAB3C	0.760992	0	0	0.474	0	Malignant cells	PR vs. SD
DUSP6	0.759788	8.15293e-292	2.74868e-287	0.574	0.145	Malignant cells	PR vs. SD
PLAAT3	0.727094	1.09749e-21	3.70008e-17	0.312	0.243	Malignant cells	PR vs. SD
INSIG1	0.724104	9.89794e-267	3.33699e-262	0.604	0.199	Malignant cells	PR vs. SD
RPL26	0.722186	0	0	0.967	0.92	Malignant cells	PR vs. SD
HLA-DQB1	0.696174	4.25499e-296	1.43453e-291	0.559	0.082	Malignant cells	PR vs. SD
FGGY	0.690462	1.53174e-243	5.16411e-239	0.58	0.227	Malignant cells	PR vs. SD
RPS15A	0.687652	0	0	0.968	0.93	Malignant cells	PR vs. SD
NACA	0.685505	2.19794e-305	7.41014e-301	0.939	0.9	Malignant cells	PR vs. SD
FAU	0.682448	0	0	0.948	0.88	Malignant cells	PR vs. SD
CAMP	0.672781	4.86589e-231	1.64049e-226	0.361	0.002	Malignant cells	PR vs. SD
TMEM176B	0.671633	0	0	0.504	0.029	Malignant cells	PR vs. SD
APOC1	0.66659	1.11324e-60	3.75318e-56	0.285	0.128	Malignant cells	PR vs. SD
KIT	0.6615	0	0	0.498	0.006	Malignant cells	PR vs. SD
RPL22	0.655357	0	0	0.932	0.85	Malignant cells	PR vs. SD
EPB41L4A-AS1	0.648107	8.87652e-215	2.99263e-210	0.653	0.356	Malignant cells	PR vs. SD
EIF3E	0.644373	6.71516e-203	2.26395e-198	0.834	0.691	Malignant cells	PR vs. SD
LSM3	0.643192	4.14349e-302	1.39694e-297	0.76	0.395	Malignant cells	PR vs. SD
HOPX	0.638864	5.93545e-26	2.00108e-21	0.276	0.191	Malignant cells	PR vs. SD
ID2	0.635686	7.20069e-198	2.42764e-193	0.529	0.169	Malignant cells	PR vs. SD
ADIRF	0.615326	2.64406e-237	8.91418e-233	0.571	0.192	Malignant cells	PR vs. SD
RPL38	0.612653	1.60733e-159	5.41894e-155	0.914	0.861	Malignant cells	PR vs. SD
CUTA	0.611764	0	0	0.799	0.444	Malignant cells	PR vs. SD
NPM1	0.610704	1.8266e-163	6.1582e-159	0.898	0.815	Malignant cells	PR vs. SD
RPL7A	0.606937	3.87562e-203	1.30663e-198	0.957	0.923	Malignant cells	PR vs. SD
EPCAM	0.60338	7.95015e-91	2.68031e-86	0.739	0.479	Malignant cells	PR vs. SD
UBXN1	0.59758	1.69754e-293	5.7231e-289	0.784	0.482	Malignant cells	PR vs. SD
KRT18	0.59149	9.42239e-196	3.17667e-191	0.923	0.736	Malignant cells	PR vs. SD
MT-ND4	0.589373	1.69929e-177	5.72898e-173	0.861	0.679	Malignant cells	PR vs. SD
SNHG7	0.583945	6.63018e-134	2.2353e-129	0.715	0.542	Malignant cells	PR vs. SD
ATP5PO	0.57998	4.57934e-267	1.54388e-262	0.83	0.579	Malignant cells	PR vs. SD
CFD	0.579374	0	0	0.568	0.097	Malignant cells	PR vs. SD
PDK4	0.575739	1.92049e-260	6.47474e-256	0.476	0.064	Malignant cells	PR vs. SD
RPS7	0.571822	3.1835e-296	1.07329e-291	0.972	0.939	Malignant cells	PR vs. SD
DUSP23	0.567048	2.82898e-199	9.53763e-195	0.657	0.358	Malignant cells	PR vs. SD
EMB	0.566971	8.02938e-291	2.70702e-286	0.548	0.101	Malignant cells	PR vs. SD
HMGA1	0.566345	3.62379e-184	1.22173e-179	0.837	0.608	Malignant cells	PR vs. SD
RPS21	0.565332	6.56354e-249	2.21283e-244	0.936	0.87	Malignant cells	PR vs. SD
TPT1	0.561808	7.6247e-199	2.57059e-194	0.969	0.947	Malignant cells	PR vs. SD
CDKN2A	0.557792	2.31346e-82	7.79959e-78	0.278	0.073	Malignant cells	PR vs. SD
PEBP1	0.547382	3.60176e-197	1.2143e-192	0.85	0.622	Malignant cells	PR vs. SD
CRYM	0.547283	4.44971e-284	1.50018e-279	0.457	0.024	Malignant cells	PR vs. SD
MT-CO3	0.546528	1.409e-130	4.75029e-126	0.881	0.738	Malignant cells	PR vs. SD
SOX4	0.546051	8.25593e-09	0.00027834	0.637	0.579	Malignant cells	PR vs. SD
CREG1	0.53603	7.4856e-153	2.52369e-148	0.652	0.407	Malignant cells	PR vs. SD
FCGRT	0.534966	4.39672e-277	1.48231e-272	0.671	0.267	Malignant cells	PR vs. SD
BTF3	0.524118	5.01992e-185	1.69241e-180	0.9	0.833	Malignant cells	PR vs. SD
ETFB	0.517735	2.01834e-253	6.80462e-249	0.509	0.078	Malignant cells	PR vs. SD
TMEM176A	0.51648	1.84721e-257	6.22768e-253	0.442	0.033	Malignant cells	PR vs. SD
NEAT1	0.514331	3.4175e-212	1.15217e-207	0.821	0.557	Malignant cells	PR vs. SD
EVI2B	0.513623	9.37794e-239	3.16168e-234	0.42	0.032	Malignant cells	PR vs. SD
SNHG3	0.508339	2.78338e-241	9.38388e-237	0.554	0.161	Malignant cells	PR vs. SD
EEF1D	0.508303	4.01969e-197	1.3552e-192	0.894	0.789	Malignant cells	PR vs. SD
RPL12	0.500649	7.18142e-119	2.42114e-114	0.96	0.952	Malignant cells	PR vs. SD
UQCRB	0.487893	1.38499e-214	4.66937e-210	0.862	0.733	Malignant cells	PR vs. SD
RPS13	0.48747	5.71334e-201	1.9262e-196	0.945	0.914	Malignant cells	PR vs. SD
RPL10	0.478272	5.71971e-298	1.92834e-293	0.99	0.972	Malignant cells	PR vs. SD
SEC11A	0.470942	6.79973e-199	2.29246e-194	0.802	0.554	Malignant cells	PR vs. SD
RHOBTB3	0.468305	9.64288e-85	3.251e-80	0.426	0.225	Malignant cells	PR vs. SD
NAP1L1	0.464663	3.21125e-157	1.08264e-152	0.807	0.626	Malignant cells	PR vs. SD
PFDN5	0.463551	2.16773e-225	7.30829e-221	0.908	0.826	Malignant cells	PR vs. SD
COX4I1	0.461478	9.98515e-232	3.36639e-227	0.895	0.786	Malignant cells	PR vs. SD
HLA-DRA	0.457586	5.31367e-254	1.79145e-249	0.741	0.216	Malignant cells	PR vs. SD
EIF3M	0.457534	2.07484e-149	6.99511e-145	0.745	0.544	Malignant cells	PR vs. SD
MT-ND1	0.443894	7.41418e-132	2.49962e-127	0.865	0.697	Malignant cells	PR vs. SD
RPS24	0.440177	8.35977e-182	2.81841e-177	0.962	0.916	Malignant cells	PR vs. SD
RPS4X	0.425467	1.6069e-184	5.41749e-180	0.961	0.933	Malignant cells	PR vs. SD
TOMM7	0.424218	4.43426e-175	1.49497e-170	0.876	0.751	Malignant cells	PR vs. SD
CD63	0.416943	4.55411e-82	1.53537e-77	0.89	0.66	Malignant cells	PR vs. SD
RBM3	0.415662	4.38373e-136	1.47793e-131	0.793	0.609	Malignant cells	PR vs. SD
RPL18A	0.414214	2.25695e-101	7.60909e-97	0.956	0.948	Malignant cells	PR vs. SD
MARCKSL1	0.413713	6.16723e-51	2.07922e-46	0.546	0.403	Malignant cells	PR vs. SD
GCLC	0.411162	6.62124e-97	2.23228e-92	0.625	0.437	Malignant cells	PR vs. SD
MIB2	0.410321	2.20675e-230	7.43983e-226	0.552	0.176	Malignant cells	PR vs. SD
RPL35	0.407771	1.37877e-139	4.64839e-135	0.948	0.885	Malignant cells	PR vs. SD
ANTKMT	0.406962	5.42091e-217	1.8276e-212	0.571	0.22	Malignant cells	PR vs. SD
ERP29	0.402909	2.5694e-159	8.66246e-155	0.828	0.608	Malignant cells	PR vs. SD
BNIP3	0.399597	4.98906e-188	1.68201e-183	0.6	0.229	Malignant cells	PR vs. SD
RPS8	0.39536	3.15882e-186	1.06497e-181	0.975	0.952	Malignant cells	PR vs. SD
TIMM13	0.385658	1.39947e-160	4.71816e-156	0.735	0.482	Malignant cells	PR vs. SD
AURKAIP1	0.383642	6.88833e-178	2.32233e-173	0.799	0.568	Malignant cells	PR vs. SD
IMPDH2	0.375707	1.19418e-130	4.02607e-126	0.709	0.465	Malignant cells	PR vs. SD
CRYL1	0.374797	1.47652e-173	4.97793e-169	0.488	0.178	Malignant cells	PR vs. SD
APRT	0.372555	2.26421e-174	7.63357e-170	0.792	0.553	Malignant cells	PR vs. SD
RAB27B	0.37183	2.79973e-75	9.439e-71	0.39	0.196	Malignant cells	PR vs. SD
CYB5A	0.371717	5.94928e-147	2.00574e-142	0.763	0.477	Malignant cells	PR vs. SD
EIF3F	0.371702	2.19646e-131	7.40515e-127	0.803	0.63	Malignant cells	PR vs. SD
HIST1H2AC	0.369131	2.6166e-09	8.82161e-05	0.398	0.342	Malignant cells	PR vs. SD
ATP5ME	0.367848	4.15474e-157	1.40073e-152	0.799	0.577	Malignant cells	PR vs. SD
PAFAH1B3	0.366123	1.11758e-75	3.76779e-71	0.565	0.378	Malignant cells	PR vs. SD
IGFBP6	0.363555	3.80511e-144	1.28285e-139	0.304	0.039	Malignant cells	PR vs. SD
C7orf50	0.361928	7.88298e-39	2.65767e-34	0.492	0.371	Malignant cells	PR vs. SD
TPM2	0.360099	8.95677e-83	3.01968e-78	0.367	0.163	Malignant cells	PR vs. SD
RPS27A	0.357335	8.57247e-183	2.89012e-178	0.976	0.961	Malignant cells	PR vs. SD
C4orf48	0.35282	2.40256e-62	8.10001e-58	0.581	0.395	Malignant cells	PR vs. SD
CCDC85B	0.352731	4.30591e-174	1.45169e-169	0.631	0.333	Malignant cells	PR vs. SD
GFI1B	0.350738	3.05518e-216	1.03002e-211	0.342	0.001	Malignant cells	PR vs. SD
YBX1	0.349066	2.4149e-130	8.14158e-126	0.899	0.797	Malignant cells	PR vs. SD
KRTCAP3	0.348146	6.39709e-117	2.15672e-112	0.507	0.258	Malignant cells	PR vs. SD
EIF3H	0.347629	8.43323e-143	2.84318e-138	0.841	0.689	Malignant cells	PR vs. SD
XBP1	0.347619	6.96564e-28	2.3484e-23	0.607	0.47	Malignant cells	PR vs. SD
UBA52	0.347543	8.28656e-116	2.79373e-111	0.915	0.875	Malignant cells	PR vs. SD
ARL6IP4	0.342347	6.82689e-154	2.30162e-149	0.808	0.592	Malignant cells	PR vs. SD
UQCRH	0.340471	6.11503e-129	2.06162e-124	0.881	0.765	Malignant cells	PR vs. SD
ZNF581	0.339791	3.11847e-138	1.05136e-133	0.556	0.296	Malignant cells	PR vs. SD
DDAH2	0.339744	1.00005e-07	0.00337156	0.255	0.23	Malignant cells	PR vs. SD
TOMM6	0.338912	8.82479e-99	2.97519e-94	0.835	0.647	Malignant cells	PR vs. SD
HLA-DPB1	0.337899	1.69376e-177	5.71035e-173	0.532	0.137	Malignant cells	PR vs. SD
PPA1	0.334891	2.26182e-124	7.6255e-120	0.779	0.566	Malignant cells	PR vs. SD
GSTM3	0.334488	7.41277e-46	2.49914e-41	0.296	0.16	Malignant cells	PR vs. SD
SDC4	0.333719	7.94417e-24	2.6783e-19	0.466	0.374	Malignant cells	PR vs. SD
COX7C	0.333252	1.29915e-164	4.37994e-160	0.893	0.805	Malignant cells	PR vs. SD
C19orf48	0.333097	2.35549e-129	7.9413e-125	0.597	0.333	Malignant cells	PR vs. SD
RPL35A	0.332954	1.40033e-145	4.72107e-141	0.954	0.94	Malignant cells	PR vs. SD
NBEAL1	0.332793	1.13499e-171	3.8265e-167	0.572	0.263	Malignant cells	PR vs. SD
SNHG6	0.331743	7.41341e-118	2.49936e-113	0.816	0.645	Malignant cells	PR vs. SD
MDK	0.331141	1.00674e-62	3.39414e-58	0.738	0.503	Malignant cells	PR vs. SD
NME2	0.326396	4.11462e-87	1.3872e-82	0.892	0.851	Malignant cells	PR vs. SD
VASP	0.325173	3.84765e-42	1.2972e-37	0.394	0.267	Malignant cells	PR vs. SD
SNRPN	0.324956	5.61172e-208	1.89193e-203	0.444	0.077	Malignant cells	PR vs. SD
NDUFB10	0.322717	2.72546e-146	9.18861e-142	0.777	0.554	Malignant cells	PR vs. SD
RPS19	0.322557	2.4812e-164	8.3651e-160	0.989	0.972	Malignant cells	PR vs. SD
MT-ND2	0.322235	1.60652e-110	5.41621e-106	0.869	0.681	Malignant cells	PR vs. SD
RAB11FIP1	0.320038	6.90953e-100	2.32948e-95	0.729	0.469	Malignant cells	PR vs. SD
FTL	0.318635	1.34744e-25	4.54276e-21	0.978	0.922	Malignant cells	PR vs. SD
LDLRAD4	0.31662	1.60755e-131	5.41968e-127	0.454	0.183	Malignant cells	PR vs. SD
NSA2	0.315403	8.67698e-136	2.92536e-131	0.697	0.454	Malignant cells	PR vs. SD
OCIAD2	0.313115	6.68748e-73	2.25462e-68	0.7	0.498	Malignant cells	PR vs. SD
LYRM4	0.311005	2.31369e-153	7.80038e-149	0.52	0.228	Malignant cells	PR vs. SD
PNN	0.310834	9.81394e-74	3.30867e-69	0.565	0.381	Malignant cells	PR vs. SD
LINC01326	0.310762	2.28086e-195	7.68969e-191	0.314	0	Malignant cells	PR vs. SD
COX17	0.310292	2.30306e-127	7.76452e-123	0.731	0.481	Malignant cells	PR vs. SD
OLA1	0.30856	2.1771e-133	7.33986e-129	0.683	0.423	Malignant cells	PR vs. SD
CKB	0.307759	5.44806e-156	1.83676e-151	0.703	0.385	Malignant cells	PR vs. SD
RPS16	0.307031	6.7053e-112	2.26062e-107	0.97	0.941	Malignant cells	PR vs. SD
NBDY	0.306844	9.60525e-154	3.23831e-149	0.556	0.254	Malignant cells	PR vs. SD
UQCRC2	0.306842	6.2164e-151	2.0958e-146	0.647	0.359	Malignant cells	PR vs. SD
VKORC1	0.306585	6.57092e-142	2.21532e-137	0.631	0.367	Malignant cells	PR vs. SD
PLA1A	0.305555	6.54622e-180	2.20699e-175	0.321	0.019	Malignant cells	PR vs. SD
NDUFAF8	0.304442	1.15732e-102	3.9018e-98	0.735	0.523	Malignant cells	PR vs. SD
MRPL11	0.303903	5.18291e-142	1.74737e-137	0.649	0.382	Malignant cells	PR vs. SD
PCBD1	0.301785	1.97924e-113	6.67283e-109	0.736	0.49	Malignant cells	PR vs. SD
ZNF428	0.300963	2.64871e-114	8.92985e-110	0.653	0.405	Malignant cells	PR vs. SD
EIF3G	0.299837	9.44189e-103	3.18324e-98	0.786	0.618	Malignant cells	PR vs. SD
RPL36AL	0.295772	5.47406e-132	1.84552e-127	0.86	0.74	Malignant cells	PR vs. SD
RNASE6	0.295456	2.88438e-147	9.7244e-143	0.271	0.012	Malignant cells	PR vs. SD
NFIA	0.293774	7.25682e-121	2.44656e-116	0.56	0.294	Malignant cells	PR vs. SD
CAMK2B	0.292164	1.29913e-162	4.37988e-158	0.271	0	Malignant cells	PR vs. SD
FNIP2	0.291213	3.82642e-133	1.29004e-128	0.335	0.075	Malignant cells	PR vs. SD
PPIG	0.2907	7.06444e-51	2.3817e-46	0.578	0.419	Malignant cells	PR vs. SD
SNRPD3	0.289574	6.0897e-47	2.05308e-42	0.458	0.311	Malignant cells	PR vs. SD
MRPL21	0.289418	1.45317e-124	4.89923e-120	0.636	0.384	Malignant cells	PR vs. SD
EIF3I	0.287859	3.92633e-105	1.32372e-100	0.74	0.516	Malignant cells	PR vs. SD
MANF	0.28738	1.35575e-113	4.57077e-109	0.573	0.315	Malignant cells	PR vs. SD
ATP5MG	0.286166	1.89904e-123	6.40241e-119	0.896	0.763	Malignant cells	PR vs. SD
LETMD1	0.285694	3.27425e-114	1.10388e-109	0.545	0.308	Malignant cells	PR vs. SD
SNHG14	0.285617	2.12848e-131	7.17597e-127	0.308	0.052	Malignant cells	PR vs. SD
RPL36A	0.284279	1.28042e-91	4.31682e-87	0.935	0.887	Malignant cells	PR vs. SD
CHCHD10	0.284261	7.27019e-96	2.45107e-91	0.802	0.641	Malignant cells	PR vs. SD
MCRIP2	0.283709	3.28622e-153	1.10792e-148	0.536	0.251	Malignant cells	PR vs. SD
ATP5MPL	0.282672	1.14782e-107	3.86975e-103	0.81	0.654	Malignant cells	PR vs. SD
CRIP2	0.282315	3.50428e-125	1.18143e-120	0.439	0.141	Malignant cells	PR vs. SD
CXXC5	0.281857	3.19971e-133	1.07875e-128	0.441	0.153	Malignant cells	PR vs. SD
GTF3A	0.280113	6.23895e-122	2.1034e-117	0.645	0.399	Malignant cells	PR vs. SD
NPDC1	0.27877	6.1394e-214	2.06984e-209	0.41	0.04	Malignant cells	PR vs. SD
PLAGL1	0.278255	4.73053e-114	1.59485e-109	0.363	0.113	Malignant cells	PR vs. SD
RAB32	0.277216	1.27481e-141	4.2979e-137	0.38	0.097	Malignant cells	PR vs. SD
EIF3D	0.276853	1.51327e-103	5.10183e-99	0.797	0.629	Malignant cells	PR vs. SD
TRAPPC2L	0.275786	2.31499e-129	7.80474e-125	0.557	0.295	Malignant cells	PR vs. SD
PRELID1	0.274147	6.18255e-111	2.08438e-106	0.755	0.531	Malignant cells	PR vs. SD
RAMP2	0.273126	7.90331e-152	2.66452e-147	0.346	0.069	Malignant cells	PR vs. SD
PAX1	0.272659	1.03727e-164	3.49705e-160	0.274	0.001	Malignant cells	PR vs. SD
PPDPF	0.270947	2.89705e-36	9.7671e-32	0.88	0.727	Malignant cells	PR vs. SD
SH3BGRL	0.270209	2.79784e-203	9.43265e-199	0.485	0.097	Malignant cells	PR vs. SD
ATP5MC1	0.269217	1.92385e-83	6.48606e-79	0.743	0.522	Malignant cells	PR vs. SD
NAA10	0.26909	4.91688e-151	1.65768e-146	0.588	0.303	Malignant cells	PR vs. SD
SNRPD2	0.267736	2.12903e-76	7.1778e-72	0.881	0.737	Malignant cells	PR vs. SD
HMGN1	0.267056	2.27199e-75	7.6598e-71	0.849	0.664	Malignant cells	PR vs. SD
HPCAL1	0.262554	4.9903e-134	1.68243e-129	0.409	0.134	Malignant cells	PR vs. SD
CLEC2B	0.262505	2.36587e-86	7.9763e-82	0.483	0.258	Malignant cells	PR vs. SD
EDF1	0.262131	9.62079e-106	3.24355e-101	0.869	0.737	Malignant cells	PR vs. SD
FIBP	0.259262	1.44356e-114	4.86682e-110	0.578	0.341	Malignant cells	PR vs. SD
LRBA	0.257546	2.38673e-122	8.04664e-118	0.493	0.226	Malignant cells	PR vs. SD
GDF15	0.256879	9.25805e-53	3.12126e-48	0.347	0.167	Malignant cells	PR vs. SD
TKT	0.254942	1.36915e-60	4.61597e-56	0.765	0.596	Malignant cells	PR vs. SD
PMAIP1	0.254541	1.29459e-57	4.36457e-53	0.606	0.454	Malignant cells	PR vs. SD
PNISR	0.254503	2.86467e-70	9.65794e-66	0.6	0.398	Malignant cells	PR vs. SD
CCND1	0.253505	2.97822e-28	1.00408e-23	0.557	0.412	Malignant cells	PR vs. SD
PARK7	0.252854	8.32664e-96	2.80724e-91	0.82	0.622	Malignant cells	PR vs. SD
ABRAXAS1	0.252273	1.5049e-90	5.07361e-86	0.411	0.199	Malignant cells	PR vs. SD
EIF1AY	0.251639	7.31571e-212	2.46642e-207	0.416	0.047	Malignant cells	PR vs. SD
NPC2	0.25125	3.68231e-25	1.24145e-20	0.766	0.571	Malignant cells	PR vs. SD
NPM3	0.251042	2.31363e-128	7.80017e-124	0.521	0.245	Malignant cells	PR vs. SD
DCAF7	-0.250037	3.86878e-18	1.30432e-13	0.423	0.469	Malignant cells	PR vs. SD
ISCA1	-0.250055	8.22903e-22	2.77433e-17	0.357	0.432	Malignant cells	PR vs. SD
CREM	-0.250364	7.79732e-54	2.62879e-49	0.156	0.296	Malignant cells	PR vs. SD
NDUFB9	-0.250371	2.04865e-18	6.90682e-14	0.783	0.687	Malignant cells	PR vs. SD
NGDN	-0.250393	2.94128e-50	9.91623e-46	0.257	0.398	Malignant cells	PR vs. SD
AKT1	-0.250436	4.1718e-77	1.40648e-72	0.208	0.394	Malignant cells	PR vs. SD
WNK1	-0.250501	5.54433e-31	1.86922e-26	0.418	0.5	Malignant cells	PR vs. SD
NR2F2	-0.250788	1.60294e-31	5.40415e-27	0.296	0.41	Malignant cells	PR vs. SD
MRPL51	-0.250903	1.83526e-18	6.18739e-14	0.815	0.709	Malignant cells	PR vs. SD
PPP2CA	-0.250936	1.54388e-25	5.20505e-21	0.424	0.503	Malignant cells	PR vs. SD
CBX3	-0.251148	1.32647e-20	4.47205e-16	0.57	0.595	Malignant cells	PR vs. SD
PDE4DIP	-0.251161	3.55104e-135	1.1972e-130	0.118	0.339	Malignant cells	PR vs. SD
PRR13	-0.251251	2.09e-18	7.04622e-14	0.661	0.648	Malignant cells	PR vs. SD
MAPRE1	-0.251325	9.72337e-42	3.27814e-37	0.333	0.46	Malignant cells	PR vs. SD
RAB11B	-0.251329	1.78001e-41	6.00112e-37	0.427	0.554	Malignant cells	PR vs. SD
SDK1	-0.251348	0	0	0.013	0.254	Malignant cells	PR vs. SD
DENND2C	-0.251448	7.72297e-182	2.60372e-177	0.049	0.257	Malignant cells	PR vs. SD
IGF1R	-0.251485	8.8377e-20	2.97954e-15	0.302	0.375	Malignant cells	PR vs. SD
NEDD9	-0.251613	1.54208e-103	5.19896e-99	0.125	0.325	Malignant cells	PR vs. SD
SMARCA5	-0.251889	4.00437e-34	1.35003e-29	0.321	0.431	Malignant cells	PR vs. SD
UPP1	-0.252016	1.10647e-39	3.73035e-35	0.18	0.31	Malignant cells	PR vs. SD
TPM1	-0.252023	2.46815e-38	8.32112e-34	0.32	0.467	Malignant cells	PR vs. SD
SF3A2	-0.252104	2.49135e-48	8.39933e-44	0.299	0.441	Malignant cells	PR vs. SD
CAMSAP2	-0.252269	6.57718e-90	2.21743e-85	0.11	0.277	Malignant cells	PR vs. SD
BNIP2	-0.252384	1.43393e-59	4.83436e-55	0.261	0.426	Malignant cells	PR vs. SD
RANGAP1	-0.25239	2.62874e-61	8.86254e-57	0.193	0.35	Malignant cells	PR vs. SD
DARS	-0.25241	3.82053e-13	1.28805e-08	0.508	0.519	Malignant cells	PR vs. SD
PSMD14	-0.252557	1.16182e-36	3.91695e-32	0.397	0.494	Malignant cells	PR vs. SD
RNF141	-0.252609	3.93551e-74	1.32682e-69	0.199	0.381	Malignant cells	PR vs. SD
SPEN	-0.252643	6.50759e-46	2.19397e-41	0.26	0.396	Malignant cells	PR vs. SD
LMO4	-0.252788	6.04759e-97	2.03888e-92	0.208	0.437	Malignant cells	PR vs. SD
SPIRE1	-0.252842	8.86409e-121	2.98844e-116	0.1	0.298	Malignant cells	PR vs. SD
UBAP2L	-0.252898	8.1067e-58	2.73309e-53	0.239	0.399	Malignant cells	PR vs. SD
TPBG	-0.253017	1.45815e-113	4.916e-109	0.12	0.317	Malignant cells	PR vs. SD
NOTCH3	-0.253179	4.69959e-73	1.58442e-68	0.11	0.258	Malignant cells	PR vs. SD
TMEM165	-0.253187	1.7337e-26	5.84499e-22	0.474	0.536	Malignant cells	PR vs. SD
CACUL1	-0.253195	1.82051e-29	6.13767e-25	0.3	0.408	Malignant cells	PR vs. SD
S100A16	-0.253739	1.30629e-98	4.40404e-94	0.333	0.562	Malignant cells	PR vs. SD
LAMC1	-0.253929	6.38064e-95	2.15117e-90	0.167	0.358	Malignant cells	PR vs. SD
MRPL34	-0.253948	3.61902e-15	1.22012e-10	0.458	0.486	Malignant cells	PR vs. SD
SMG7	-0.254285	3.10116e-61	1.04552e-56	0.236	0.399	Malignant cells	PR vs. SD
SLC44A2	-0.25437	1.77453e-99	5.98264e-95	0.212	0.423	Malignant cells	PR vs. SD
GSS	-0.254435	9.81492e-40	3.309e-35	0.285	0.411	Malignant cells	PR vs. SD
RSU1	-0.254568	2.8433e-61	9.5859e-57	0.21	0.367	Malignant cells	PR vs. SD
ZBTB38	-0.254674	9.13831e-71	3.08089e-66	0.24	0.427	Malignant cells	PR vs. SD
NOP2	-0.254821	2.51361e-84	8.47439e-80	0.18	0.362	Malignant cells	PR vs. SD
FRK	-0.254822	5.96722e-168	2.01179e-163	0.069	0.283	Malignant cells	PR vs. SD
MDH1	-0.254869	5.82284e-35	1.96311e-30	0.589	0.604	Malignant cells	PR vs. SD
CCDC124	-0.254897	6.17884e-28	2.08314e-23	0.401	0.485	Malignant cells	PR vs. SD
TTLL12	-0.255069	7.71975e-69	2.60264e-64	0.184	0.347	Malignant cells	PR vs. SD
FRMD6	-0.255775	1.42307e-212	4.79775e-208	0.055	0.291	Malignant cells	PR vs. SD
PAF1	-0.255796	1.47068e-89	4.95824e-85	0.247	0.45	Malignant cells	PR vs. SD
RC3H1	-0.256002	1.77979e-84	6.00038e-80	0.191	0.378	Malignant cells	PR vs. SD
NEK7	-0.256021	3.24462e-77	1.09389e-72	0.166	0.34	Malignant cells	PR vs. SD
SAMD4B	-0.256256	1.27995e-58	4.31523e-54	0.304	0.478	Malignant cells	PR vs. SD
RASAL2	-0.256397	6.53512e-91	2.20325e-86	0.146	0.328	Malignant cells	PR vs. SD
CNOT6L	-0.256421	2.32817e-61	7.84918e-57	0.171	0.322	Malignant cells	PR vs. SD
DNM2	-0.256549	9.41206e-62	3.17318e-57	0.237	0.407	Malignant cells	PR vs. SD
PLD1	-0.256792	2.86547e-216	9.66064e-212	0.064	0.313	Malignant cells	PR vs. SD
SRSF2	-0.257071	8.64546e-15	2.91473e-10	0.714	0.65	Malignant cells	PR vs. SD
YPEL5	-0.257078	6.49532e-17	2.18983e-12	0.455	0.523	Malignant cells	PR vs. SD
C8orf76	-0.257248	1.59287e-102	5.37021e-98	0.155	0.357	Malignant cells	PR vs. SD
SCCPDH	-0.257297	5.99044e-35	2.01962e-30	0.305	0.416	Malignant cells	PR vs. SD
ILF3	-0.257405	3.0013e-17	1.01186e-12	0.515	0.54	Malignant cells	PR vs. SD
NBN	-0.257519	8.51822e-73	2.87183e-68	0.206	0.385	Malignant cells	PR vs. SD
RNF13	-0.257583	1.58445e-24	5.34181e-20	0.398	0.467	Malignant cells	PR vs. SD
SEC14L1	-0.257633	5.81525e-53	1.96055e-48	0.184	0.331	Malignant cells	PR vs. SD
ARFGAP3	-0.257755	3.11424e-81	1.04994e-76	0.213	0.406	Malignant cells	PR vs. SD
RAB4B	-0.257993	5.67586e-89	1.91356e-84	0.236	0.449	Malignant cells	PR vs. SD
HSP90AB1	-0.258096	7.43659e-59	2.50717e-54	0.946	0.881	Malignant cells	PR vs. SD
TMCO1	-0.258259	1.21115e-24	4.08329e-20	0.477	0.512	Malignant cells	PR vs. SD
HIST1H2BK	-0.258637	9.46767e-117	3.19193e-112	0.12	0.329	Malignant cells	PR vs. SD
ZBTB7A	-0.258936	1.09867e-20	3.70407e-16	0.404	0.468	Malignant cells	PR vs. SD
ABCG1	-0.259237	4.81964e-243	1.62489e-238	0.03	0.258	Malignant cells	PR vs. SD
CDKN1A	-0.25943	1.1399e-13	3.84305e-09	0.427	0.484	Malignant cells	PR vs. SD
KYNU	-0.259532	5.01244e-216	1.68989e-211	0.035	0.251	Malignant cells	PR vs. SD
LINC00511	-0.259547	6.98903e-40	2.35628e-35	0.275	0.401	Malignant cells	PR vs. SD
FAM91A1	-0.259598	8.22396e-83	2.77262e-78	0.166	0.347	Malignant cells	PR vs. SD
ATRN	-0.260259	1.05675e-163	3.56272e-159	0.103	0.335	Malignant cells	PR vs. SD
KDM1A	-0.26033	1.30505e-65	4.39984e-61	0.228	0.397	Malignant cells	PR vs. SD
SAMD12	-0.260756	2.56846e-96	8.65932e-92	0.117	0.3	Malignant cells	PR vs. SD
ARL6IP6	-0.260878	2.96027e-58	9.98025e-54	0.252	0.409	Malignant cells	PR vs. SD
WSB2	-0.260885	5.60245e-33	1.88881e-28	0.278	0.387	Malignant cells	PR vs. SD
CAPZA2	-0.260978	6.61874e-53	2.23144e-48	0.379	0.521	Malignant cells	PR vs. SD
RAB10	-0.260999	3.5691e-41	1.20329e-36	0.504	0.6	Malignant cells	PR vs. SD
VPS4B	-0.261207	7.53884e-78	2.54164e-73	0.251	0.442	Malignant cells	PR vs. SD
VPS28	-0.26128	1.75318e-28	5.91065e-24	0.629	0.64	Malignant cells	PR vs. SD
MALT1	-0.26131	1.98231e-141	6.68316e-137	0.087	0.295	Malignant cells	PR vs. SD
KCTD1	-0.261429	2.58884e-32	8.728e-28	0.215	0.321	Malignant cells	PR vs. SD
HMGN3	-0.261604	2.1683e-14	7.31022e-10	0.697	0.643	Malignant cells	PR vs. SD
KRCC1	-0.261676	3.6122e-59	1.21782e-54	0.251	0.405	Malignant cells	PR vs. SD
CPNE1	-0.261786	7.07568e-38	2.38549e-33	0.355	0.461	Malignant cells	PR vs. SD
HDAC1	-0.261976	1.03766e-51	3.49837e-47	0.342	0.485	Malignant cells	PR vs. SD
TXN	-0.262027	9.41887e-39	3.17548e-34	0.892	0.839	Malignant cells	PR vs. SD
LINC01980	-0.262096	4.05856e-277	1.3683e-272	0.034	0.291	Malignant cells	PR vs. SD
SLC44A1	-0.262244	5.84855e-95	1.97178e-90	0.194	0.393	Malignant cells	PR vs. SD
STAT1	-0.262304	4.09438e-55	1.38038e-50	0.307	0.482	Malignant cells	PR vs. SD
ALDH2	-0.262446	6.63436e-35	2.23671e-30	0.306	0.426	Malignant cells	PR vs. SD
TMTC3	-0.262656	3.09809e-90	1.04449e-85	0.186	0.371	Malignant cells	PR vs. SD
NUCB2	-0.26367	6.11563e-12	2.06182e-07	0.421	0.324	Malignant cells	PR vs. SD
SMIM19	-0.263749	7.99523e-49	2.69551e-44	0.375	0.507	Malignant cells	PR vs. SD
BPTF	-0.263872	4.0013e-18	1.349e-13	0.468	0.502	Malignant cells	PR vs. SD
RAB40B	-0.264018	3.43455e-43	1.15792e-38	0.228	0.357	Malignant cells	PR vs. SD
FAM32A	-0.264049	9.43476e-42	3.18083e-37	0.324	0.449	Malignant cells	PR vs. SD
HSPB11	-0.2641	2.89498e-12	9.76015e-08	0.332	0.399	Malignant cells	PR vs. SD
CNOT11	-0.264101	1.94603e-98	6.56084e-94	0.182	0.381	Malignant cells	PR vs. SD
MED15	-0.264377	1.298e-68	4.37609e-64	0.257	0.435	Malignant cells	PR vs. SD
HACD3	-0.264462	1.39372e-19	4.6988e-15	0.439	0.472	Malignant cells	PR vs. SD
CORO2A	-0.264528	2.51546e-153	8.48062e-149	0.113	0.346	Malignant cells	PR vs. SD
CUX1	-0.264624	1.59964e-75	5.39302e-71	0.304	0.493	Malignant cells	PR vs. SD
PPIC	-0.264923	6.42037e-30	2.16456e-25	0.373	0.461	Malignant cells	PR vs. SD
CTSS	-0.264948	6.60408e-25	2.2265e-20	0.263	0.358	Malignant cells	PR vs. SD
DUSP14	-0.265065	2.73646e-28	9.2257e-24	0.29	0.392	Malignant cells	PR vs. SD
GTF2I	-0.265218	1.35012e-32	4.55178e-28	0.54	0.596	Malignant cells	PR vs. SD
PRKX	-0.265495	1.37055e-97	4.62067e-93	0.14	0.33	Malignant cells	PR vs. SD
ERH	-0.265724	7.92917e-23	2.67324e-18	0.71	0.661	Malignant cells	PR vs. SD
PARVB	-0.265917	5.20753e-89	1.75567e-84	0.148	0.327	Malignant cells	PR vs. SD
TAX1BP1	-0.265924	2.93227e-20	9.88585e-16	0.582	0.615	Malignant cells	PR vs. SD
TOR1AIP1	-0.266629	8.64019e-102	2.91295e-97	0.151	0.35	Malignant cells	PR vs. SD
GALNT3	-0.266857	7.16644e-112	2.41609e-107	0.165	0.388	Malignant cells	PR vs. SD
PTPRA	-0.267309	6.96829e-58	2.34929e-53	0.259	0.415	Malignant cells	PR vs. SD
ACIN1	-0.26738	1.43454e-48	4.83642e-44	0.327	0.468	Malignant cells	PR vs. SD
TBC1D20	-0.267574	2.9708e-107	1.00158e-102	0.164	0.371	Malignant cells	PR vs. SD
MORF4L2	-0.267593	5.80796e-44	1.9581e-39	0.526	0.61	Malignant cells	PR vs. SD
DPYSL3	-0.267728	8.5706e-211	2.88949e-206	0.051	0.284	Malignant cells	PR vs. SD
POLDIP2	-0.268113	8.16441e-13	2.75255e-08	0.494	0.503	Malignant cells	PR vs. SD
IQCG	-0.268153	7.72179e-60	2.60332e-55	0.114	0.251	Malignant cells	PR vs. SD
TRIP10	-0.268675	2.21713e-55	7.47485e-51	0.15	0.296	Malignant cells	PR vs. SD
XRN1	-0.268699	7.1363e-106	2.40593e-101	0.167	0.377	Malignant cells	PR vs. SD
KIF3B	-0.268726	1.90163e-56	6.41117e-52	0.195	0.347	Malignant cells	PR vs. SD
LSG1	-0.269314	1.57371e-97	5.30561e-93	0.177	0.376	Malignant cells	PR vs. SD
EP300	-0.269353	2.61451e-86	8.81454e-82	0.202	0.393	Malignant cells	PR vs. SD
ADAM10	-0.269424	2.7306e-58	9.20595e-54	0.28	0.435	Malignant cells	PR vs. SD
KMT2E	-0.269505	7.84322e-30	2.64426e-25	0.402	0.499	Malignant cells	PR vs. SD
MICALL1	-0.2696	8.58576e-171	2.8946e-166	0.099	0.336	Malignant cells	PR vs. SD
FIS1	-0.269603	3.25987e-21	1.09903e-16	0.585	0.594	Malignant cells	PR vs. SD
BACE2	-0.269606	4.03441e-116	1.36016e-111	0.109	0.313	Malignant cells	PR vs. SD
EMILIN2	-0.269676	4.95337e-93	1.66998e-88	0.15	0.334	Malignant cells	PR vs. SD
COL4A5	-0.269708	2.8091e-273	9.47061e-269	0.024	0.259	Malignant cells	PR vs. SD
DAP3	-0.269831	4.53298e-24	1.52825e-19	0.516	0.547	Malignant cells	PR vs. SD
SUMF2	-0.270044	1.83452e-46	6.1849e-42	0.333	0.456	Malignant cells	PR vs. SD
GTF2H5	-0.270171	1.02313e-20	3.44939e-16	0.438	0.503	Malignant cells	PR vs. SD
MPZL1	-0.270287	6.7611e-62	2.27944e-57	0.269	0.419	Malignant cells	PR vs. SD
WIPI1	-0.270532	3.90036e-84	1.31497e-79	0.15	0.328	Malignant cells	PR vs. SD
KPNA2	-0.270616	3.32864e-35	1.12222e-30	0.26	0.38	Malignant cells	PR vs. SD
MID1IP1	-0.270718	2.74926e-72	9.26887e-68	0.234	0.413	Malignant cells	PR vs. SD
KHDRBS1	-0.270824	3.41614e-21	1.15172e-16	0.672	0.636	Malignant cells	PR vs. SD
ARL4C	-0.270859	9.7599e-62	3.29045e-57	0.194	0.362	Malignant cells	PR vs. SD
JAK1	-0.270885	9.18023e-40	3.09502e-35	0.356	0.482	Malignant cells	PR vs. SD
DHX40	-0.271034	7.84661e-88	2.64541e-83	0.162	0.342	Malignant cells	PR vs. SD
HDAC2	-0.271046	4.47691e-27	1.50935e-22	0.492	0.549	Malignant cells	PR vs. SD
CCT5	-0.271083	4.22779e-43	1.42536e-38	0.584	0.626	Malignant cells	PR vs. SD
CARM1	-0.271404	4.99906e-107	1.68538e-102	0.148	0.347	Malignant cells	PR vs. SD
DDX3X	-0.27169	2.58239e-18	8.70625e-14	0.481	0.527	Malignant cells	PR vs. SD
CYP2S1	-0.271795	2.93759e-105	9.90379e-101	0.189	0.428	Malignant cells	PR vs. SD
PHYH	-0.271833	1.06186e-51	3.57994e-47	0.219	0.363	Malignant cells	PR vs. SD
KIAA1217	-0.271971	1.78707e-59	6.02494e-55	0.215	0.365	Malignant cells	PR vs. SD
PTOV1	-0.271996	5.08549e-21	1.71452e-16	0.472	0.524	Malignant cells	PR vs. SD
FOXK2	-0.27223	5.73617e-90	1.93389e-85	0.194	0.383	Malignant cells	PR vs. SD
SOWAHC	-0.27224	1.89395e-108	6.38527e-104	0.115	0.31	Malignant cells	PR vs. SD
SCAND1	-0.272649	1.87375e-11	6.31716e-07	0.705	0.642	Malignant cells	PR vs. SD
EIF4G2	-0.272797	3.88593e-34	1.3101e-29	0.785	0.754	Malignant cells	PR vs. SD
TST	-0.272893	7.7779e-67	2.62224e-62	0.197	0.362	Malignant cells	PR vs. SD
MCCC1	-0.272991	1.67855e-134	5.65907e-130	0.12	0.338	Malignant cells	PR vs. SD
HIBADH	-0.273345	2.29862e-72	7.74955e-68	0.231	0.407	Malignant cells	PR vs. SD
BST1	-0.273453	0	0	0.011	0.255	Malignant cells	PR vs. SD
RGCC	-0.273519	1.58145e-16	5.3317e-12	0.234	0.315	Malignant cells	PR vs. SD
CXADR	-0.27365	5.29057e-26	1.78366e-21	0.353	0.431	Malignant cells	PR vs. SD
PRDX4	-0.27379	4.16545e-13	1.40434e-08	0.55	0.516	Malignant cells	PR vs. SD
GSPT1	-0.273868	5.17954e-34	1.74623e-29	0.41	0.502	Malignant cells	PR vs. SD
MEF2A	-0.27392	7.97314e-80	2.68807e-75	0.186	0.366	Malignant cells	PR vs. SD
KRTCAP2	-0.273947	2.64184e-22	8.90671e-18	0.711	0.666	Malignant cells	PR vs. SD
EFHD2	-0.274067	2.73119e-42	9.20792e-38	0.35	0.495	Malignant cells	PR vs. SD
TMX4	-0.274091	2.07234e-78	6.98669e-74	0.185	0.366	Malignant cells	PR vs. SD
ZYX	-0.274177	7.42808e-131	2.5043e-126	0.172	0.417	Malignant cells	PR vs. SD
CAST	-0.274373	1.83389e-74	6.18279e-70	0.408	0.61	Malignant cells	PR vs. SD
SOCS3	-0.274456	2.4908e-38	8.39747e-34	0.25	0.379	Malignant cells	PR vs. SD
AP2A1	-0.274576	4.03857e-67	1.36156e-62	0.2	0.367	Malignant cells	PR vs. SD
RBMS1	-0.274745	8.04031e-59	2.71071e-54	0.331	0.497	Malignant cells	PR vs. SD
CASK	-0.275013	9.37489e-153	3.16065e-148	0.128	0.366	Malignant cells	PR vs. SD
BAG3	-0.275243	1.68336e-120	5.67529e-116	0.219	0.472	Malignant cells	PR vs. SD
SLC7A8	-0.275651	1.84804e-148	6.23048e-144	0.068	0.269	Malignant cells	PR vs. SD
SET	-0.276294	6.70906e-24	2.26189e-19	0.779	0.722	Malignant cells	PR vs. SD
PPP6C	-0.276587	3.32653e-49	1.12151e-44	0.282	0.418	Malignant cells	PR vs. SD
RABGAP1L	-0.276646	1.92053e-76	6.47488e-72	0.259	0.458	Malignant cells	PR vs. SD
H2AFV	-0.2767	5.6256e-57	1.89661e-52	0.53	0.64	Malignant cells	PR vs. SD
GPRC5A	-0.276746	6.00868e-27	2.02577e-22	0.268	0.402	Malignant cells	PR vs. SD
PPP1CB	-0.277014	5.23646e-24	1.76542e-19	0.49	0.567	Malignant cells	PR vs. SD
EID1	-0.277311	1.3894e-20	4.68422e-16	0.589	0.594	Malignant cells	PR vs. SD
GNGT1	-0.277748	5.31101e-303	1.79056e-298	0.035	0.309	Malignant cells	PR vs. SD
CYTH1	-0.277783	1.84663e-77	6.22573e-73	0.172	0.352	Malignant cells	PR vs. SD
NECTIN2	-0.277969	5.55e-55	1.87113e-50	0.307	0.471	Malignant cells	PR vs. SD
IFI35	-0.277997	5.10372e-51	1.72067e-46	0.206	0.347	Malignant cells	PR vs. SD
CBR1	-0.278046	2.0639e-44	6.95822e-40	0.355	0.476	Malignant cells	PR vs. SD
BICD2	-0.278231	8.7606e-112	2.95355e-107	0.124	0.319	Malignant cells	PR vs. SD
SEC61B	-0.278409	2.19729e-29	7.40793e-25	0.756	0.7	Malignant cells	PR vs. SD
MCM4	-0.279055	3.65e-58	1.23056e-53	0.13	0.268	Malignant cells	PR vs. SD
HTATSF1	-0.279262	1.49695e-58	5.04682e-54	0.269	0.433	Malignant cells	PR vs. SD
COPS2	-0.279428	5.0667e-34	1.70819e-29	0.382	0.471	Malignant cells	PR vs. SD
MAFF	-0.279432	3.41437e-25	1.15112e-20	0.241	0.343	Malignant cells	PR vs. SD
CIAO2A	-0.279435	1.44579e-38	4.87434e-34	0.398	0.49	Malignant cells	PR vs. SD
IFNGR1	-0.279482	2.02394e-99	6.82352e-95	0.212	0.411	Malignant cells	PR vs. SD
S100A10	-0.27993	2.54933e-156	8.59482e-152	0.404	0.885	Malignant cells	PR vs. SD
USO1	-0.279933	1.19403e-57	4.02556e-53	0.287	0.445	Malignant cells	PR vs. SD
IFRD1	-0.280581	5.01297e-26	1.69007e-21	0.324	0.418	Malignant cells	PR vs. SD
SLK	-0.280613	1.18623e-57	3.99925e-53	0.226	0.398	Malignant cells	PR vs. SD
PRRC2B	-0.280656	3.34396e-37	1.12738e-32	0.373	0.481	Malignant cells	PR vs. SD
SLC20A2	-0.280875	1.83994e-101	6.20316e-97	0.176	0.382	Malignant cells	PR vs. SD
FGFR1OP2	-0.280881	1.24993e-70	4.21402e-66	0.274	0.438	Malignant cells	PR vs. SD
FBXO27	-0.281103	1.73247e-142	5.84084e-138	0.086	0.298	Malignant cells	PR vs. SD
ANKRD17	-0.281441	1.45424e-42	4.90282e-38	0.342	0.455	Malignant cells	PR vs. SD
CRYBG1	-0.281527	4.17566e-142	1.40778e-137	0.097	0.312	Malignant cells	PR vs. SD
PHLDA3	-0.281576	2.53291e-45	8.53947e-41	0.344	0.479	Malignant cells	PR vs. SD
CALCOCO2	-0.282031	5.16967e-65	1.7429e-60	0.257	0.423	Malignant cells	PR vs. SD
DNAJC15	-0.282907	8.01827e-133	2.70328e-128	0.22	0.503	Malignant cells	PR vs. SD
NDUFA11	-0.283115	1.00933e-33	3.40285e-29	0.789	0.725	Malignant cells	PR vs. SD
NGRN	-0.283413	1.32198e-14	4.45691e-10	0.598	0.592	Malignant cells	PR vs. SD
SAFB	-0.283648	1.40996e-71	4.75352e-67	0.254	0.428	Malignant cells	PR vs. SD
PIK3R1	-0.28497	5.64293e-70	1.90246e-65	0.142	0.3	Malignant cells	PR vs. SD
RALA	-0.285056	1.79702e-20	6.05847e-16	0.449	0.503	Malignant cells	PR vs. SD
KAZN	-0.28509	5.15654e-141	1.73848e-136	0.09	0.302	Malignant cells	PR vs. SD
TMEM19	-0.285163	3.0352e-135	1.02329e-130	0.111	0.323	Malignant cells	PR vs. SD
ABHD17A	-0.285224	1.9424e-43	6.5486e-39	0.321	0.448	Malignant cells	PR vs. SD
TBL1XR1	-0.285281	5.37881e-45	1.81341e-40	0.39	0.509	Malignant cells	PR vs. SD
TCP1	-0.28567	2.46079e-07	0.00829632	0.612	0.568	Malignant cells	PR vs. SD
NXT1	-0.285682	1.2594e-42	4.24595e-38	0.298	0.426	Malignant cells	PR vs. SD
TMEM50A	-0.2858	3.32678e-41	1.12159e-36	0.45	0.551	Malignant cells	PR vs. SD
TPST1	-0.28629	2.79081e-193	9.40892e-189	0.079	0.321	Malignant cells	PR vs. SD
LURAP1L	-0.286306	9.79024e-101	3.30068e-96	0.086	0.253	Malignant cells	PR vs. SD
COPS4	-0.286346	1.10995e-90	3.74209e-86	0.24	0.431	Malignant cells	PR vs. SD
CRIP1	-0.286523	1.6841e-20	5.67778e-16	0.486	0.345	Malignant cells	PR vs. SD
ADIPOR2	-0.286638	1.89688e-74	6.39515e-70	0.212	0.384	Malignant cells	PR vs. SD
SUZ12	-0.286668	2.43759e-42	8.21811e-38	0.312	0.432	Malignant cells	PR vs. SD
OTUD1	-0.28686	6.00321e-139	2.02392e-134	0.077	0.274	Malignant cells	PR vs. SD
GNAQ	-0.287852	2.21047e-36	7.45236e-32	0.301	0.422	Malignant cells	PR vs. SD
TIPARP	-0.287961	1.80737e-34	6.09338e-30	0.307	0.423	Malignant cells	PR vs. SD
MIEN1	-0.288063	1.14468e-09	3.85917e-05	0.621	0.572	Malignant cells	PR vs. SD
PIGS	-0.288182	1.82047e-81	6.13752e-77	0.255	0.43	Malignant cells	PR vs. SD
ZNF664	-0.288246	1.29348e-40	4.36085e-36	0.321	0.446	Malignant cells	PR vs. SD
MKRN1	-0.28858	3.6723e-44	1.23808e-39	0.388	0.507	Malignant cells	PR vs. SD
LAPTM4A	-0.288937	1.77674e-23	5.9901e-19	0.675	0.629	Malignant cells	PR vs. SD
WWP1	-0.289046	8.38562e-113	2.82713e-108	0.158	0.373	Malignant cells	PR vs. SD
NDUFA13	-0.289072	1.20076e-37	4.04825e-33	0.801	0.735	Malignant cells	PR vs. SD
PSMD10	-0.289319	3.07716e-84	1.03743e-79	0.223	0.408	Malignant cells	PR vs. SD
ZDHHC12	-0.28949	9.17369e-32	3.09282e-27	0.352	0.451	Malignant cells	PR vs. SD
CDKN2AIP	-0.289548	1.42216e-126	4.79466e-122	0.132	0.346	Malignant cells	PR vs. SD
SEMA3F	-0.290006	4.33916e-150	1.46291e-145	0.075	0.281	Malignant cells	PR vs. SD
RHPN2	-0.29031	3.15417e-82	1.0634e-77	0.144	0.317	Malignant cells	PR vs. SD
AGFG1	-0.290553	7.39744e-84	2.49397e-79	0.181	0.366	Malignant cells	PR vs. SD
CAV2	-0.290635	1.26908e-105	4.27857e-101	0.207	0.447	Malignant cells	PR vs. SD
EID2	-0.290848	1.63893e-145	5.52547e-141	0.134	0.364	Malignant cells	PR vs. SD
TMPO	-0.291193	1.69995e-57	5.7312e-53	0.277	0.437	Malignant cells	PR vs. SD
UBA6	-0.291315	1.33063e-76	4.48609e-72	0.205	0.385	Malignant cells	PR vs. SD
RANBP2	-0.29135	7.60316e-49	2.56333e-44	0.269	0.405	Malignant cells	PR vs. SD
HACD4	-0.291422	9.98317e-38	3.36572e-33	0.247	0.366	Malignant cells	PR vs. SD
GSR	-0.291439	2.49047e-105	8.39636e-101	0.139	0.338	Malignant cells	PR vs. SD
SLC39A4	-0.291614	1.40578e-31	4.73944e-27	0.343	0.441	Malignant cells	PR vs. SD
NCAPD2	-0.292083	4.10249e-94	1.38311e-89	0.131	0.315	Malignant cells	PR vs. SD
TMEM150C	-0.292429	1.69579e-288	5.7172e-284	0.021	0.258	Malignant cells	PR vs. SD
CRTAP	-0.292513	2.51987e-83	8.49548e-79	0.254	0.431	Malignant cells	PR vs. SD
ELP5	-0.292694	8.01472e-113	2.70208e-108	0.181	0.4	Malignant cells	PR vs. SD
LAMP2	-0.292801	1.03494e-49	3.4892e-45	0.339	0.456	Malignant cells	PR vs. SD
TANK	-0.293153	2.7782e-90	9.36643e-86	0.219	0.41	Malignant cells	PR vs. SD
C1D	-0.293365	1.79497e-63	6.05157e-59	0.326	0.483	Malignant cells	PR vs. SD
MAOA	-0.293451	6.19979e-134	2.0902e-129	0.131	0.362	Malignant cells	PR vs. SD
HAUS4	-0.293627	3.4777e-47	1.17247e-42	0.302	0.423	Malignant cells	PR vs. SD
UHMK1	-0.294011	2.75418e-61	9.28543e-57	0.32	0.472	Malignant cells	PR vs. SD
LRP1	-0.294389	2.64036e-80	8.90172e-76	0.156	0.324	Malignant cells	PR vs. SD
TCTEX1D2	-0.294459	1.18204e-09	3.98511e-05	0.251	0.319	Malignant cells	PR vs. SD
PPP3R1	-0.294595	2.17115e-137	7.31983e-133	0.128	0.355	Malignant cells	PR vs. SD
SCD5	-0.294637	7.4943e-239	2.52663e-234	0.051	0.303	Malignant cells	PR vs. SD
PLPP2	-0.294987	4.60775e-12	1.55346e-07	0.47	0.467	Malignant cells	PR vs. SD
RNF213	-0.295276	2.60352e-74	8.77752e-70	0.306	0.488	Malignant cells	PR vs. SD
MBNL1	-0.295297	4.26204e-70	1.4369e-65	0.358	0.537	Malignant cells	PR vs. SD
TMEM40	-0.295389	1.99421e-40	6.72328e-36	0.157	0.277	Malignant cells	PR vs. SD
P4HB	-0.295402	3.29614e-29	1.11126e-24	0.821	0.722	Malignant cells	PR vs. SD
ZC2HC1A	-0.295475	8.71261e-178	2.93737e-173	0.102	0.352	Malignant cells	PR vs. SD
RAB21	-0.295497	7.66296e-46	2.58349e-41	0.301	0.428	Malignant cells	PR vs. SD
HLA-B	-0.29563	1.30422e-22	4.39705e-18	0.828	0.765	Malignant cells	PR vs. SD
KEAP1	-0.295868	9.56355e-60	3.22426e-55	0.284	0.437	Malignant cells	PR vs. SD
SQSTM1	-0.29614	5.85129e-31	1.9727e-26	0.722	0.706	Malignant cells	PR vs. SD
LSM12	-0.29646	4.13376e-37	1.39366e-32	0.362	0.463	Malignant cells	PR vs. SD
BZW1	-0.297061	1.38096e-37	4.65578e-33	0.419	0.538	Malignant cells	PR vs. SD
CYTOR	-0.297157	4.84663e-25	1.63399e-20	0.218	0.316	Malignant cells	PR vs. SD
CTHRC1	-0.297393	1.65914e-151	5.59363e-147	0.077	0.284	Malignant cells	PR vs. SD
HCAR2	-0.2974	1.15599e-222	3.89732e-218	0.054	0.298	Malignant cells	PR vs. SD
WASHC1	-0.297469	1.6147e-118	5.44379e-114	0.264	0.509	Malignant cells	PR vs. SD
MMP24OS	-0.297542	1.58874e-08	0.000535626	0.552	0.543	Malignant cells	PR vs. SD
TPR	-0.297864	4.49657e-45	1.51597e-40	0.452	0.545	Malignant cells	PR vs. SD
UQCR10	-0.29793	1.73896e-52	5.86273e-48	0.84	0.791	Malignant cells	PR vs. SD
IDH2	-0.298383	3.35028e-31	1.12951e-26	0.483	0.554	Malignant cells	PR vs. SD
CNIH4	-0.298568	5.63357e-33	1.8993e-28	0.555	0.575	Malignant cells	PR vs. SD
ADGRG1	-0.298773	8.59988e-69	2.89936e-64	0.225	0.39	Malignant cells	PR vs. SD
ATG5	-0.299247	2.13197e-71	7.18772e-67	0.238	0.413	Malignant cells	PR vs. SD
RORA	-0.299362	9.96893e-160	3.36093e-155	0.072	0.285	Malignant cells	PR vs. SD
TRIM28	-0.29938	2.09427e-48	7.06064e-44	0.44	0.557	Malignant cells	PR vs. SD
POLR2B	-0.299488	1.42897e-79	4.81762e-75	0.262	0.445	Malignant cells	PR vs. SD
RAB5C	-0.299548	1.45179e-31	4.89456e-27	0.59	0.606	Malignant cells	PR vs. SD
NFE2L2	-0.299696	1.13019e-23	3.81034e-19	0.61	0.625	Malignant cells	PR vs. SD
SIPA1L3	-0.29999	3.09517e-122	1.04351e-117	0.175	0.404	Malignant cells	PR vs. SD
UGCG	-0.30015	1.40153e-73	4.72512e-69	0.214	0.396	Malignant cells	PR vs. SD
CSNK1G2	-0.300172	3.25823e-90	1.09848e-85	0.243	0.438	Malignant cells	PR vs. SD
PLEC	-0.300172	6.09834e-95	2.05599e-90	0.246	0.469	Malignant cells	PR vs. SD
QKI	-0.300465	2.51308e-127	8.47261e-123	0.191	0.426	Malignant cells	PR vs. SD
ATP2A2	-0.300771	3.5513e-23	1.19728e-18	0.519	0.538	Malignant cells	PR vs. SD
GSK3A	-0.300904	2.17782e-90	7.34231e-86	0.244	0.449	Malignant cells	PR vs. SD
IER3IP1	-0.301056	1.03493e-35	3.48917e-31	0.448	0.517	Malignant cells	PR vs. SD
ICK	-0.301417	5.84287e-116	1.96987e-111	0.161	0.374	Malignant cells	PR vs. SD
CNDP2	-0.301419	1.96669e-56	6.6305e-52	0.312	0.472	Malignant cells	PR vs. SD
UBE2Z	-0.301597	1.63648e-46	5.51724e-42	0.374	0.491	Malignant cells	PR vs. SD
USP6NL	-0.302062	2.54247e-84	8.57169e-80	0.18	0.366	Malignant cells	PR vs. SD
POP4	-0.30208	5.11872e-76	1.72573e-71	0.299	0.482	Malignant cells	PR vs. SD
PRDX1	-0.302105	8.13852e-82	2.74382e-77	0.755	0.817	Malignant cells	PR vs. SD
MTAP	-0.302163	6.50753e-105	2.19395e-100	0.177	0.38	Malignant cells	PR vs. SD
DDX60	-0.302761	2.64009e-96	8.9008e-92	0.087	0.252	Malignant cells	PR vs. SD
IFT172	-0.302894	1.47538e-113	4.97411e-109	0.095	0.282	Malignant cells	PR vs. SD
IFT27	-0.302933	2.65579e-62	8.95373e-58	0.194	0.363	Malignant cells	PR vs. SD
ACADVL	-0.302972	8.89947e-58	3.00037e-53	0.37	0.523	Malignant cells	PR vs. SD
TMEM183A	-0.303086	2.36536e-58	7.97458e-54	0.351	0.498	Malignant cells	PR vs. SD
COA6	-0.303435	8.09583e-47	2.72943e-42	0.346	0.472	Malignant cells	PR vs. SD
PFKP	-0.30363	2.29031e-79	7.72156e-75	0.286	0.472	Malignant cells	PR vs. SD
EVL	-0.303938	4.65479e-57	1.56932e-52	0.121	0.259	Malignant cells	PR vs. SD
PAIP1	-0.304219	4.46893e-55	1.50666e-50	0.45	0.588	Malignant cells	PR vs. SD
WTAP	-0.30452	6.37893e-47	2.15059e-42	0.343	0.471	Malignant cells	PR vs. SD
COPE	-0.304878	1.87449e-25	6.31964e-21	0.67	0.651	Malignant cells	PR vs. SD
GNB1	-0.304927	1.69626e-27	5.71878e-23	0.469	0.545	Malignant cells	PR vs. SD
CCNY	-0.304966	1.03289e-83	3.48229e-79	0.224	0.41	Malignant cells	PR vs. SD
PNRC1	-0.305174	3.15812e-12	1.06473e-07	0.737	0.709	Malignant cells	PR vs. SD
PSMD4	-0.305217	3.70922e-40	1.25053e-35	0.589	0.622	Malignant cells	PR vs. SD
RALB	-0.305617	1.27125e-89	4.2859e-85	0.172	0.364	Malignant cells	PR vs. SD
H3F3A	-0.305772	7.43971e-137	2.50822e-132	0.938	0.927	Malignant cells	PR vs. SD
TTC9	-0.305779	1.05547e-110	3.55841e-106	0.102	0.289	Malignant cells	PR vs. SD
ASH2L	-0.305941	2.09784e-141	7.07265e-137	0.145	0.384	Malignant cells	PR vs. SD
LINC01503	-0.306031	1.64618e-112	5.54992e-108	0.121	0.319	Malignant cells	PR vs. SD
GNA13	-0.306116	1.73179e-98	5.83855e-94	0.156	0.35	Malignant cells	PR vs. SD
CXCL17	-0.306144	2.87627e-53	9.69704e-49	0.174	0.337	Malignant cells	PR vs. SD
SPINT2	-0.306167	7.50366e-66	2.52979e-61	0.879	0.801	Malignant cells	PR vs. SD
RBPMS	-0.306186	1.40712e-142	4.74397e-138	0.157	0.413	Malignant cells	PR vs. SD
HNRNPM	-0.306323	3.06955e-38	1.03487e-33	0.569	0.61	Malignant cells	PR vs. SD
STXBP2	-0.306543	6.17677e-82	2.08243e-77	0.265	0.467	Malignant cells	PR vs. SD
FDFT1	-0.306828	2.30634e-20	7.77559e-16	0.445	0.509	Malignant cells	PR vs. SD
PGM2L1	-0.306917	1.41172e-121	4.75946e-117	0.127	0.338	Malignant cells	PR vs. SD
PTK2	-0.306995	3.31547e-96	1.11778e-91	0.282	0.484	Malignant cells	PR vs. SD
NCK1	-0.307482	5.7061e-54	1.92376e-49	0.303	0.444	Malignant cells	PR vs. SD
GAA	-0.307511	2.76791e-40	9.33173e-36	0.284	0.393	Malignant cells	PR vs. SD
FAM110A	-0.307546	4.6257e-130	1.55951e-125	0.143	0.361	Malignant cells	PR vs. SD
DUS1L	-0.307602	1.60901e-35	5.42461e-31	0.413	0.496	Malignant cells	PR vs. SD
KDM5A	-0.308115	4.8317e-45	1.62896e-40	0.363	0.471	Malignant cells	PR vs. SD
LUC7L2	-0.308158	5.85426e-60	1.9737e-55	0.351	0.502	Malignant cells	PR vs. SD
FSCN1	-0.308396	8.63745e-109	2.91203e-104	0.141	0.352	Malignant cells	PR vs. SD
DYNLL1	-0.308538	1.31657e-24	4.43869e-20	0.875	0.807	Malignant cells	PR vs. SD
OAS3	-0.308674	1.44725e-98	4.87927e-94	0.142	0.335	Malignant cells	PR vs. SD
SLC7A5	-0.309101	6.08867e-55	2.05273e-50	0.156	0.298	Malignant cells	PR vs. SD
TJP2	-0.309121	1.82565e-47	6.155e-43	0.205	0.343	Malignant cells	PR vs. SD
DEGS1	-0.309149	1.45691e-73	4.91183e-69	0.235	0.403	Malignant cells	PR vs. SD
NPEPPS	-0.309179	7.78044e-31	2.6231e-26	0.438	0.518	Malignant cells	PR vs. SD
TRA2B	-0.309269	1.60938e-48	5.42585e-44	0.559	0.615	Malignant cells	PR vs. SD
RBIS	-0.309629	9.84381e-39	3.31874e-34	0.584	0.613	Malignant cells	PR vs. SD
GPX2	-0.310012	1.42006e-118	4.78757e-114	0.081	0.271	Malignant cells	PR vs. SD
FZD6	-0.310071	1.85152e-120	6.24222e-116	0.181	0.394	Malignant cells	PR vs. SD
ANKRD13A	-0.310636	3.19607e-65	1.07752e-60	0.178	0.339	Malignant cells	PR vs. SD
APMAP	-0.310774	1.88316e-62	6.34889e-58	0.333	0.478	Malignant cells	PR vs. SD
TMBIM1	-0.311003	2.90911e-62	9.80778e-58	0.305	0.477	Malignant cells	PR vs. SD
SEPTIN11	-0.311004	7.32572e-86	2.46979e-81	0.262	0.447	Malignant cells	PR vs. SD
CD44	-0.311333	1.13268e-25	3.8187e-21	0.471	0.526	Malignant cells	PR vs. SD
CMAS	-0.31143	2.03367e-49	6.85631e-45	0.354	0.483	Malignant cells	PR vs. SD
MAPK6	-0.312197	1.28534e-61	4.33338e-57	0.212	0.372	Malignant cells	PR vs. SD
ADM	-0.312329	2.31185e-10	7.79418e-06	0.312	0.371	Malignant cells	PR vs. SD
PSMB1	-0.312454	5.51426e-26	1.85908e-21	0.74	0.678	Malignant cells	PR vs. SD
SNU13	-0.312469	4.76729e-30	1.60724e-25	0.789	0.709	Malignant cells	PR vs. SD
ANP32E	-0.312503	2.05813e-73	6.93879e-69	0.25	0.428	Malignant cells	PR vs. SD
PCBP2	-0.313196	5.94347e-36	2.00378e-31	0.812	0.759	Malignant cells	PR vs. SD
HCLS1	-0.313292	1.63562e-12	5.51435e-08	0.291	0.339	Malignant cells	PR vs. SD
XPOT	-0.313409	1.29944e-84	4.38093e-80	0.214	0.403	Malignant cells	PR vs. SD
MAZ	-0.313476	6.81247e-48	2.29676e-43	0.361	0.48	Malignant cells	PR vs. SD
SMARCD2	-0.313877	2.06262e-37	6.95391e-33	0.355	0.458	Malignant cells	PR vs. SD
SDHD	-0.314342	2.52284e-38	8.5055e-34	0.448	0.524	Malignant cells	PR vs. SD
SH3BP1	-0.314404	5.0512e-146	1.70296e-141	0.102	0.319	Malignant cells	PR vs. SD
HSBP1	-0.314796	1.62687e-15	5.48482e-11	0.766	0.7	Malignant cells	PR vs. SD
TNFAIP1	-0.316196	1.36863e-96	4.61419e-92	0.171	0.364	Malignant cells	PR vs. SD
LMBRD1	-0.316266	2.17068e-115	7.31822e-111	0.195	0.408	Malignant cells	PR vs. SD
MRPL13	-0.316673	7.57798e-60	2.55484e-55	0.375	0.516	Malignant cells	PR vs. SD
GCC2	-0.316721	3.19198e-54	1.07615e-49	0.297	0.451	Malignant cells	PR vs. SD
ZNF146	-0.317278	1.46771e-62	4.94825e-58	0.321	0.477	Malignant cells	PR vs. SD
PLEKHA2	-0.317333	1.54841e-84	5.22032e-80	0.168	0.347	Malignant cells	PR vs. SD
SNX9	-0.317943	2.57574e-104	8.68383e-100	0.142	0.343	Malignant cells	PR vs. SD
HOMEZ	-0.318111	2.52283e-174	8.50546e-170	0.104	0.347	Malignant cells	PR vs. SD
TRIR	-0.318461	1.58427e-31	5.3412e-27	0.784	0.73	Malignant cells	PR vs. SD
MEIS2	-0.318612	2.64647e-204	8.92232e-200	0.078	0.328	Malignant cells	PR vs. SD
SNRPB2	-0.319064	5.69508e-52	1.92004e-47	0.444	0.544	Malignant cells	PR vs. SD
ATP2B4	-0.319367	5.80962e-139	1.95866e-134	0.159	0.395	Malignant cells	PR vs. SD
R3HDM4	-0.319581	1.20543e-104	4.06398e-100	0.215	0.427	Malignant cells	PR vs. SD
ESF1	-0.319612	6.15041e-54	2.07355e-49	0.304	0.442	Malignant cells	PR vs. SD
RNPEP	-0.319725	1.60161e-75	5.39968e-71	0.297	0.48	Malignant cells	PR vs. SD
PDLIM5	-0.319746	1.26529e-91	4.26579e-87	0.249	0.462	Malignant cells	PR vs. SD
FLOT2	-0.319891	6.79138e-58	2.28964e-53	0.331	0.467	Malignant cells	PR vs. SD
NDUFS2	-0.319928	1.37371e-54	4.63134e-50	0.437	0.543	Malignant cells	PR vs. SD
CASTOR2	-0.320529	2.25626e-152	7.60675e-148	0.12	0.355	Malignant cells	PR vs. SD
TDRD12	-0.32064	5.5695e-190	1.8777e-185	0.09	0.342	Malignant cells	PR vs. SD
CPNE3	-0.320695	4.14148e-77	1.39626e-72	0.375	0.542	Malignant cells	PR vs. SD
LMAN1	-0.32071	8.7373e-41	2.94569e-36	0.501	0.553	Malignant cells	PR vs. SD
RBFOX2	-0.320711	8.15829e-56	2.75049e-51	0.309	0.457	Malignant cells	PR vs. SD
SAMHD1	-0.32158	1.4441e-78	4.86865e-74	0.143	0.316	Malignant cells	PR vs. SD
DDIT4	-0.321584	2.25339e-08	0.000759708	0.381	0.43	Malignant cells	PR vs. SD
PIAS3	-0.3216	5.05217e-167	1.70329e-162	0.123	0.371	Malignant cells	PR vs. SD
SPPL3	-0.321802	7.36242e-49	2.48217e-44	0.344	0.469	Malignant cells	PR vs. SD
MMADHC	-0.322611	2.42968e-39	8.19142e-35	0.494	0.558	Malignant cells	PR vs. SD
PEA15	-0.322708	2.58101e-134	8.7016e-130	0.146	0.379	Malignant cells	PR vs. SD
SPIDR	-0.322745	2.69933e-122	9.10051e-118	0.184	0.413	Malignant cells	PR vs. SD
WNT7B	-0.322824	4.15038e-143	1.39926e-138	0.123	0.354	Malignant cells	PR vs. SD
LINC01578	-0.32283	8.03946e-60	2.71042e-55	0.496	0.624	Malignant cells	PR vs. SD
ARHGAP23	-0.323151	1.87685e-237	6.32763e-233	0.063	0.322	Malignant cells	PR vs. SD
IARS2	-0.323474	1.58839e-68	5.35508e-64	0.318	0.469	Malignant cells	PR vs. SD
EIF2AK2	-0.323569	3.78953e-52	1.2776e-47	0.34	0.486	Malignant cells	PR vs. SD
SERTAD3	-0.323781	7.34984e-72	2.47792e-67	0.232	0.427	Malignant cells	PR vs. SD
GRSF1	-0.324137	7.56454e-39	2.55031e-34	0.484	0.547	Malignant cells	PR vs. SD
RSRP1	-0.324191	2.64548e-37	8.91896e-33	0.362	0.466	Malignant cells	PR vs. SD
NUFIP2	-0.324527	2.30416e-48	7.76823e-44	0.377	0.494	Malignant cells	PR vs. SD
PTGES	-0.324705	1.46527e-188	4.94001e-184	0.064	0.291	Malignant cells	PR vs. SD
PLIN3	-0.324791	5.72622e-79	1.93054e-74	0.215	0.408	Malignant cells	PR vs. SD
IGF2BP2	-0.324989	6.36207e-63	2.14491e-58	0.394	0.533	Malignant cells	PR vs. SD
UBE2A	-0.32537	2.78008e-74	9.37276e-70	0.34	0.512	Malignant cells	PR vs. SD
SEPTIN9	-0.325563	1.43319e-33	4.83186e-29	0.48	0.551	Malignant cells	PR vs. SD
DDX24	-0.326161	5.91405e-35	1.99386e-30	0.442	0.524	Malignant cells	PR vs. SD
CD82	-0.326869	4.01779e-130	1.35456e-125	0.188	0.433	Malignant cells	PR vs. SD
AL445524.1	-0.327025	2.1697e-42	7.31492e-38	0.227	0.344	Malignant cells	PR vs. SD
TNFAIP8	-0.327323	1.76869e-138	5.96295e-134	0.131	0.358	Malignant cells	PR vs. SD
SDHC	-0.327338	2.94195e-47	9.9185e-43	0.55	0.602	Malignant cells	PR vs. SD
APH1A	-0.327351	8.18138e-34	2.75827e-29	0.489	0.547	Malignant cells	PR vs. SD
LRATD1	-0.327367	2.61647e-144	8.82115e-140	0.122	0.355	Malignant cells	PR vs. SD
SLC25A5	-0.327696	2.07366e-27	6.99114e-23	0.847	0.788	Malignant cells	PR vs. SD
DAZAP1	-0.327723	1.08037e-75	3.64234e-71	0.38	0.534	Malignant cells	PR vs. SD
HERC2	-0.327788	1.6728e-66	5.63969e-62	0.285	0.441	Malignant cells	PR vs. SD
ATP1A1	-0.328063	5.63254e-66	1.89895e-61	0.471	0.585	Malignant cells	PR vs. SD
MRPS30	-0.328154	7.67983e-56	2.58918e-51	0.34	0.465	Malignant cells	PR vs. SD
PRKCI	-0.328302	3.41677e-117	1.15193e-112	0.21	0.44	Malignant cells	PR vs. SD
OGFRL1	-0.328855	1.36979e-85	4.61812e-81	0.168	0.345	Malignant cells	PR vs. SD
EIF2S2	-0.328928	5.89691e-32	1.98808e-27	0.688	0.669	Malignant cells	PR vs. SD
RYR1	-0.329085	1.38844e-214	4.68099e-210	0.072	0.331	Malignant cells	PR vs. SD
RAB14	-0.329182	2.61316e-89	8.81e-85	0.328	0.52	Malignant cells	PR vs. SD
LARP4B	-0.329744	8.52362e-78	2.87365e-73	0.275	0.461	Malignant cells	PR vs. SD
GARS	-0.329786	6.87913e-57	2.31923e-52	0.297	0.446	Malignant cells	PR vs. SD
PSMD8	-0.329889	3.16811e-78	1.0681e-73	0.729	0.747	Malignant cells	PR vs. SD
NUDT5	-0.330014	2.38982e-44	8.05704e-40	0.461	0.531	Malignant cells	PR vs. SD
PPP1R2	-0.330052	5.56336e-68	1.87563e-63	0.338	0.509	Malignant cells	PR vs. SD
HPRT1	-0.330057	3.80327e-63	1.28223e-58	0.306	0.454	Malignant cells	PR vs. SD
MKNK2	-0.330621	1.31331e-20	4.42771e-16	0.45	0.515	Malignant cells	PR vs. SD
EPAS1	-0.331104	5.00311e-81	1.68675e-76	0.171	0.355	Malignant cells	PR vs. SD
SMC5	-0.331277	3.27331e-96	1.10356e-91	0.219	0.415	Malignant cells	PR vs. SD
CSNK2A1	-0.33128	6.65432e-55	2.24344e-50	0.39	0.513	Malignant cells	PR vs. SD
USF2	-0.331579	4.40055e-45	1.4836e-40	0.354	0.478	Malignant cells	PR vs. SD
GTF2A2	-0.331759	2.13125e-30	7.18529e-26	0.541	0.584	Malignant cells	PR vs. SD
DNAJA1	-0.331776	2.04154e-24	6.88286e-20	0.646	0.636	Malignant cells	PR vs. SD
G3BP1	-0.331903	2.60694e-55	8.78903e-51	0.395	0.515	Malignant cells	PR vs. SD
STAT3	-0.331903	1.15693e-79	3.90046e-75	0.444	0.598	Malignant cells	PR vs. SD
LPCAT4	-0.332395	1.84288e-120	6.2131e-116	0.135	0.347	Malignant cells	PR vs. SD
NCOA4	-0.332853	1.96796e-64	6.63477e-60	0.336	0.477	Malignant cells	PR vs. SD
MID1	-0.332925	3.81951e-220	1.28771e-215	0.088	0.358	Malignant cells	PR vs. SD
HM13	-0.333006	9.55159e-52	3.22022e-47	0.429	0.542	Malignant cells	PR vs. SD
LGALS3	-0.333352	1.46447e-28	4.93731e-24	0.77	0.775	Malignant cells	PR vs. SD
LGALS3BP	-0.333592	6.46545e-13	2.17976e-08	0.627	0.571	Malignant cells	PR vs. SD
RAD23B	-0.333693	1.61195e-44	5.43452e-40	0.471	0.564	Malignant cells	PR vs. SD
SEMA4B	-0.334052	1.26117e-123	4.25191e-119	0.175	0.398	Malignant cells	PR vs. SD
NECTIN4	-0.334149	4.62724e-40	1.56003e-35	0.231	0.361	Malignant cells	PR vs. SD
TMOD3	-0.334429	1.79655e-96	6.05687e-92	0.312	0.54	Malignant cells	PR vs. SD
HS6ST1	-0.334734	7.52909e-121	2.53836e-116	0.119	0.318	Malignant cells	PR vs. SD
KCNK1	-0.334835	3.36566e-45	1.1347e-40	0.286	0.415	Malignant cells	PR vs. SD
EIF5	-0.33528	5.78421e-46	1.95009e-41	0.591	0.626	Malignant cells	PR vs. SD
IMP3	-0.335725	4.47002e-42	1.50702e-37	0.498	0.559	Malignant cells	PR vs. SD
ACTR2	-0.335878	1.055e-63	3.55684e-59	0.421	0.579	Malignant cells	PR vs. SD
UFD1	-0.336344	1.36478e-62	4.60122e-58	0.404	0.55	Malignant cells	PR vs. SD
ELOVL5	-0.336487	3.98602e-108	1.34385e-103	0.247	0.455	Malignant cells	PR vs. SD
YME1L1	-0.33771	4.55836e-57	1.5368e-52	0.346	0.486	Malignant cells	PR vs. SD
PTPN2	-0.337991	5.68836e-59	1.91777e-54	0.358	0.481	Malignant cells	PR vs. SD
COA3	-0.338033	1.36395e-32	4.59841e-28	0.523	0.563	Malignant cells	PR vs. SD
RASGEF1B	-0.338188	3.50822e-198	1.18276e-193	0.087	0.339	Malignant cells	PR vs. SD
RAP2B	-0.338241	1.94794e-14	6.56728e-10	0.411	0.466	Malignant cells	PR vs. SD
ARPC3	-0.338275	7.94421e-67	2.67831e-62	0.864	0.813	Malignant cells	PR vs. SD
ARL5B	-0.338806	1.16625e-30	3.9319e-26	0.277	0.376	Malignant cells	PR vs. SD
STARD7	-0.339498	1.07677e-58	3.63024e-54	0.352	0.484	Malignant cells	PR vs. SD
TWSG1	-0.339741	5.04675e-225	1.70146e-220	0.093	0.365	Malignant cells	PR vs. SD
COX5B	-0.340046	1.00828e-65	3.3993e-61	0.857	0.811	Malignant cells	PR vs. SD
RBM17	-0.34044	3.69368e-40	1.24529e-35	0.504	0.563	Malignant cells	PR vs. SD
PSMG2	-0.34048	9.12688e-37	3.07704e-32	0.517	0.56	Malignant cells	PR vs. SD
ZNF706	-0.341034	4.67421e-41	1.57586e-36	0.586	0.623	Malignant cells	PR vs. SD
ZNRF2	-0.341559	1.27628e-214	4.30284e-210	0.091	0.357	Malignant cells	PR vs. SD
DERA	-0.341886	6.93397e-90	2.33772e-85	0.28	0.488	Malignant cells	PR vs. SD
SNX6	-0.34195	1.82063e-91	6.13807e-87	0.363	0.563	Malignant cells	PR vs. SD
GPCPD1	-0.341988	2.2286e-109	7.51349e-105	0.159	0.373	Malignant cells	PR vs. SD
MRPS26	-0.342914	4.19051e-34	1.41279e-29	0.552	0.573	Malignant cells	PR vs. SD
DNAJB11	-0.342937	2.82527e-57	9.52513e-53	0.429	0.527	Malignant cells	PR vs. SD
CHCHD2	-0.343196	1.12232e-73	3.78377e-69	0.876	0.825	Malignant cells	PR vs. SD
REL	-0.343482	5.83738e-40	1.96802e-35	0.358	0.472	Malignant cells	PR vs. SD
EIF4A2	-0.343599	8.43999e-51	2.84546e-46	0.837	0.775	Malignant cells	PR vs. SD
RELB	-0.344671	1.54465e-142	5.20762e-138	0.156	0.399	Malignant cells	PR vs. SD
GALNT2	-0.345387	5.27531e-138	1.77852e-133	0.143	0.365	Malignant cells	PR vs. SD
EWSR1	-0.345413	2.30531e-63	7.77213e-59	0.513	0.621	Malignant cells	PR vs. SD
IK	-0.345438	1.3028e-09	4.39227e-05	0.369	0.432	Malignant cells	PR vs. SD
ETV6	-0.345872	3.39411e-102	1.14429e-97	0.221	0.434	Malignant cells	PR vs. SD
ECE1	-0.346056	8.79254e-97	2.96432e-92	0.176	0.369	Malignant cells	PR vs. SD
FBXO9	-0.346087	5.53281e-107	1.86533e-102	0.265	0.474	Malignant cells	PR vs. SD
TOB1	-0.346102	3.51675e-08	0.00118564	0.471	0.483	Malignant cells	PR vs. SD
TNFRSF1A	-0.346154	1.51597e-64	5.11094e-60	0.373	0.506	Malignant cells	PR vs. SD
STRAP	-0.3462	2.57721e-30	8.68881e-26	0.683	0.637	Malignant cells	PR vs. SD
SRP9	-0.346258	7.79461e-63	2.62788e-58	0.636	0.682	Malignant cells	PR vs. SD
HSPA5	-0.346315	1.18537e-16	3.99637e-12	0.659	0.616	Malignant cells	PR vs. SD
PTP4A2	-0.347084	5.02861e-26	1.69535e-21	0.54	0.586	Malignant cells	PR vs. SD
MIR4435-2HG	-0.347179	3.88045e-142	1.30826e-137	0.115	0.343	Malignant cells	PR vs. SD
AZIN1	-0.34729	2.13846e-52	7.20959e-48	0.35	0.483	Malignant cells	PR vs. SD
PPP1R15A	-0.34729	1.21847e-08	0.000410795	0.68	0.616	Malignant cells	PR vs. SD
POLR2I	-0.347337	2.2528e-50	7.59509e-46	0.65	0.671	Malignant cells	PR vs. SD
ACBD3	-0.347606	1.33898e-73	4.51425e-69	0.328	0.507	Malignant cells	PR vs. SD
EPSTI1	-0.347663	3.45822e-171	1.16591e-166	0.092	0.331	Malignant cells	PR vs. SD
ARL8A	-0.347773	3.61892e-89	1.22008e-84	0.223	0.414	Malignant cells	PR vs. SD
EFNA1	-0.348238	3.04442e-55	1.0264e-50	0.282	0.435	Malignant cells	PR vs. SD
PRKAR1A	-0.348258	2.92656e-39	9.86661e-35	0.41	0.517	Malignant cells	PR vs. SD
PITPNB	-0.348365	7.57431e-110	2.5536e-105	0.255	0.473	Malignant cells	PR vs. SD
TP53TG1	-0.348484	2.87168e-78	9.68157e-74	0.29	0.453	Malignant cells	PR vs. SD
KCMF1	-0.34859	3.68734e-69	1.24315e-64	0.279	0.449	Malignant cells	PR vs. SD
PSMD3	-0.348622	2.10723e-47	7.10431e-43	0.471	0.543	Malignant cells	PR vs. SD
SIAH2	-0.348849	8.57049e-77	2.88945e-72	0.313	0.493	Malignant cells	PR vs. SD
KREMEN1	-0.34936	8.15086e-165	2.74798e-160	0.119	0.365	Malignant cells	PR vs. SD
IRF9	-0.349413	1.58091e-99	5.32987e-95	0.254	0.493	Malignant cells	PR vs. SD
NCK2	-0.349485	3.58149e-139	1.20747e-134	0.142	0.373	Malignant cells	PR vs. SD
MTUS1	-0.349655	2.36019e-106	7.95716e-102	0.223	0.435	Malignant cells	PR vs. SD
PLAT	-0.349766	1.27434e-15	4.29631e-11	0.303	0.203	Malignant cells	PR vs. SD
MED21	-0.350001	1.74733e-75	5.89096e-71	0.291	0.456	Malignant cells	PR vs. SD
ANXA2	-0.350246	2.04091e-112	6.88073e-108	0.88	0.875	Malignant cells	PR vs. SD
PIR	-0.350579	3.8184e-183	1.28734e-178	0.133	0.398	Malignant cells	PR vs. SD
AFG3L2	-0.350806	1.13555e-83	3.82839e-79	0.288	0.46	Malignant cells	PR vs. SD
BCL6	-0.351384	1.09593e-157	3.69482e-153	0.149	0.403	Malignant cells	PR vs. SD
DNAJA4	-0.351572	2.20497e-90	7.43384e-86	0.174	0.373	Malignant cells	PR vs. SD
GOLPH3	-0.351664	1.69461e-89	5.71322e-85	0.311	0.52	Malignant cells	PR vs. SD
APP	-0.352008	2.31843e-61	7.81637e-57	0.445	0.549	Malignant cells	PR vs. SD
TMBIM6	-0.352327	3.18012e-46	1.07215e-41	0.802	0.707	Malignant cells	PR vs. SD
TXNIP	-0.352451	2.1733e-19	7.32707e-15	0.332	0.397	Malignant cells	PR vs. SD
TECR	-0.352599	2.03424e-62	6.85825e-58	0.511	0.606	Malignant cells	PR vs. SD
MTRNR2L8	-0.352606	1.10993e-182	3.74203e-178	0.081	0.319	Malignant cells	PR vs. SD
GNA15	-0.353369	1.71103e-151	5.76858e-147	0.148	0.394	Malignant cells	PR vs. SD
CACYBP	-0.353567	2.09257e-40	7.05489e-36	0.575	0.597	Malignant cells	PR vs. SD
TSPAN3	-0.353786	4.22002e-51	1.42274e-46	0.48	0.566	Malignant cells	PR vs. SD
BTBD2	-0.354074	1.13742e-137	3.83469e-133	0.177	0.408	Malignant cells	PR vs. SD
HMGCS1	-0.354114	6.57707e-63	2.21739e-58	0.261	0.426	Malignant cells	PR vs. SD
STK24	-0.354363	3.89703e-99	1.31385e-94	0.356	0.559	Malignant cells	PR vs. SD
ATP6AP2	-0.354739	3.7728e-73	1.27196e-68	0.386	0.52	Malignant cells	PR vs. SD
RRAGA	-0.355053	2.6112e-72	8.80339e-68	0.305	0.477	Malignant cells	PR vs. SD
HNRNPDL	-0.355099	1.60095e-41	5.39743e-37	0.714	0.699	Malignant cells	PR vs. SD
NRBP1	-0.35589	3.19275e-133	1.0764e-128	0.254	0.505	Malignant cells	PR vs. SD
SEPTIN7	-0.356208	1.57761e-79	5.31875e-75	0.439	0.589	Malignant cells	PR vs. SD
RRBP1	-0.357018	2.02239e-70	6.81828e-66	0.364	0.526	Malignant cells	PR vs. SD
IFI44L	-0.357392	9.95791e-134	3.35721e-129	0.114	0.339	Malignant cells	PR vs. SD
RNF187	-0.357564	7.94297e-49	2.67789e-44	0.453	0.541	Malignant cells	PR vs. SD
FOXQ1	-0.357974	4.33747e-220	1.46233e-215	0.065	0.321	Malignant cells	PR vs. SD
UPF1	-0.358732	4.23302e-121	1.42712e-116	0.161	0.377	Malignant cells	PR vs. SD
MRPS35	-0.359131	1.44146e-51	4.85975e-47	0.479	0.546	Malignant cells	PR vs. SD
PIM3	-0.359159	2.5193e-16	8.49356e-12	0.587	0.568	Malignant cells	PR vs. SD
EIF2B5	-0.360032	3.07321e-110	1.0361e-105	0.271	0.474	Malignant cells	PR vs. SD
MAPK1	-0.360318	3.90981e-97	1.31815e-92	0.283	0.48	Malignant cells	PR vs. SD
COPS7A	-0.361381	4.11506e-49	1.38735e-44	0.396	0.501	Malignant cells	PR vs. SD
IL1R1	-0.361547	6.72449e-255	2.2671e-250	0.05	0.309	Malignant cells	PR vs. SD
AHNAK2	-0.361648	6.69848e-149	2.25832e-144	0.086	0.297	Malignant cells	PR vs. SD
CDC123	-0.361922	1.9014e-61	6.41038e-57	0.395	0.521	Malignant cells	PR vs. SD
SINHCAF	-0.362527	1.40243e-49	4.72815e-45	0.444	0.538	Malignant cells	PR vs. SD
SUSD4	-0.362563	2.13579e-235	7.2006e-231	0.06	0.325	Malignant cells	PR vs. SD
UQCR11	-0.36301	1.02547e-65	3.45726e-61	0.817	0.775	Malignant cells	PR vs. SD
FKBP8	-0.363053	3.87972e-52	1.30801e-47	0.581	0.627	Malignant cells	PR vs. SD
NDFIP2	-0.363878	5.31525e-81	1.79198e-76	0.248	0.422	Malignant cells	PR vs. SD
VPS25	-0.363985	6.85137e-58	2.30987e-53	0.364	0.495	Malignant cells	PR vs. SD
MAPKAPK2	-0.364154	8.19573e-120	2.76311e-115	0.215	0.438	Malignant cells	PR vs. SD
KLF10	-0.364262	8.31164e-68	2.80218e-63	0.264	0.434	Malignant cells	PR vs. SD
UBA1	-0.36433	5.62835e-117	1.89754e-112	0.289	0.527	Malignant cells	PR vs. SD
CSRP2	-0.365178	4.22585e-259	1.4247e-254	0.043	0.298	Malignant cells	PR vs. SD
YTHDC1	-0.365342	2.38579e-40	8.04347e-36	0.396	0.504	Malignant cells	PR vs. SD
NDUFA3	-0.365689	1.20494e-14	4.06234e-10	0.559	0.538	Malignant cells	PR vs. SD
LRRC1	-0.36577	9.43655e-194	3.18144e-189	0.132	0.404	Malignant cells	PR vs. SD
MAGEF1	-0.366772	6.79356e-72	2.29038e-67	0.365	0.514	Malignant cells	PR vs. SD
TIMM23	-0.367722	2.63643e-102	8.88846e-98	0.232	0.436	Malignant cells	PR vs. SD
KMT2B	-0.367796	4.40172e-139	1.48399e-134	0.199	0.442	Malignant cells	PR vs. SD
LAMTOR2	-0.367838	2.12158e-41	7.15271e-37	0.472	0.547	Malignant cells	PR vs. SD
ADIPOR1	-0.368385	9.767e-40	3.29285e-35	0.489	0.559	Malignant cells	PR vs. SD
GRINA	-0.369291	6.32756e-83	2.13327e-78	0.415	0.564	Malignant cells	PR vs. SD
HES1	-0.369734	1.64731e-18	5.55372e-14	0.45	0.504	Malignant cells	PR vs. SD
EGFR	-0.369834	1.53455e-179	5.17358e-175	0.146	0.418	Malignant cells	PR vs. SD
UBE2V2	-0.370926	4.18426e-97	1.41068e-92	0.36	0.54	Malignant cells	PR vs. SD
MARK1	-0.37172	0	0	0.043	0.354	Malignant cells	PR vs. SD
FKBP4	-0.37174	1.6144e-19	5.4428e-15	0.643	0.601	Malignant cells	PR vs. SD
SDCBP	-0.371792	1.15365e-88	3.88942e-84	0.357	0.544	Malignant cells	PR vs. SD
LRP11	-0.371926	5.26464e-93	1.77492e-88	0.127	0.308	Malignant cells	PR vs. SD
PDIA3	-0.371973	1.68354e-47	5.6759e-43	0.668	0.644	Malignant cells	PR vs. SD
UBXN4	-0.371994	1.54251e-55	5.20041e-51	0.58	0.632	Malignant cells	PR vs. SD
PSAT1	-0.372053	4.03084e-84	1.35896e-79	0.164	0.345	Malignant cells	PR vs. SD
SKP1	-0.372128	1.09268e-63	3.68387e-59	0.834	0.789	Malignant cells	PR vs. SD
BAG4	-0.372432	2.86721e-176	9.6665e-172	0.159	0.427	Malignant cells	PR vs. SD
ILF2	-0.372851	3.1883e-65	1.07491e-60	0.552	0.634	Malignant cells	PR vs. SD
TFRC	-0.373037	5.47306e-95	1.84519e-90	0.226	0.416	Malignant cells	PR vs. SD
ANXA4	-0.373697	9.47247e-48	3.19355e-43	0.473	0.562	Malignant cells	PR vs. SD
EIF6	-0.373774	5.17027e-54	1.74311e-49	0.587	0.635	Malignant cells	PR vs. SD
TIMM50	-0.374113	1.36378e-76	4.59784e-72	0.407	0.545	Malignant cells	PR vs. SD
H3F3B	-0.374156	1.94593e-84	6.56052e-80	0.947	0.945	Malignant cells	PR vs. SD
PML	-0.374233	1.57519e-124	5.3106e-120	0.196	0.423	Malignant cells	PR vs. SD
C12orf75	-0.375216	2.30905e-180	7.78474e-176	0.083	0.332	Malignant cells	PR vs. SD
SLC1A5	-0.37566	3.15116e-99	1.06238e-94	0.245	0.446	Malignant cells	PR vs. SD
PSMF1	-0.375685	6.00365e-59	2.02407e-54	0.499	0.576	Malignant cells	PR vs. SD
ITGB8	-0.375742	5.37742e-233	1.81294e-228	0.108	0.423	Malignant cells	PR vs. SD
STMP1	-0.376	1.40677e-79	4.74278e-75	0.443	0.582	Malignant cells	PR vs. SD
DCUN1D1	-0.376108	7.31417e-123	2.4659e-118	0.218	0.446	Malignant cells	PR vs. SD
NUDT4	-0.376243	2.02274e-62	6.81947e-58	0.289	0.452	Malignant cells	PR vs. SD
MGST3	-0.376438	5.4616e-43	1.84132e-38	0.513	0.582	Malignant cells	PR vs. SD
DDRGK1	-0.37658	6.00217e-65	2.02357e-60	0.442	0.54	Malignant cells	PR vs. SD
M6PR	-0.377196	1.04415e-43	3.52023e-39	0.518	0.55	Malignant cells	PR vs. SD
CDH3	-0.377212	4.2809e-170	1.44326e-165	0.151	0.412	Malignant cells	PR vs. SD
NBL1	-0.378424	2.53611e-190	8.55023e-186	0.136	0.441	Malignant cells	PR vs. SD
UBE2L3	-0.378589	4.37182e-59	1.47392e-54	0.565	0.627	Malignant cells	PR vs. SD
MAP3K2	-0.379281	2.43615e-88	8.21322e-84	0.252	0.44	Malignant cells	PR vs. SD
ENOPH1	-0.379828	2.22475e-108	7.50053e-104	0.279	0.48	Malignant cells	PR vs. SD
RAC2	-0.3813	9.6021e-20	3.23725e-15	0.215	0.301	Malignant cells	PR vs. SD
ABCF3	-0.381498	3.90009e-191	1.31488e-186	0.15	0.424	Malignant cells	PR vs. SD
DDX39A	-0.381724	5.93347e-67	2.00041e-62	0.268	0.429	Malignant cells	PR vs. SD
RAB31	-0.381838	4.91976e-184	1.65865e-179	0.148	0.427	Malignant cells	PR vs. SD
TRAM1	-0.381924	3.2884e-73	1.10865e-68	0.387	0.544	Malignant cells	PR vs. SD
IER5L	-0.382807	2.72594e-142	9.19023e-138	0.125	0.352	Malignant cells	PR vs. SD
MFAP2	-0.383078	8.92155e-178	3.00781e-173	0.101	0.344	Malignant cells	PR vs. SD
WDR83OS	-0.383658	7.13991e-52	2.40715e-47	0.751	0.703	Malignant cells	PR vs. SD
PLEKHA5	-0.383775	4.5044e-155	1.51861e-150	0.216	0.481	Malignant cells	PR vs. SD
SCARB2	-0.383784	7.61464e-49	2.5672e-44	0.456	0.516	Malignant cells	PR vs. SD
SEMA3C	-0.383941	7.93734e-207	2.676e-202	0.094	0.357	Malignant cells	PR vs. SD
MRPS12	-0.384104	1.67517e-50	5.64768e-46	0.588	0.605	Malignant cells	PR vs. SD
STAP2	-0.384389	1.156e-91	3.89733e-87	0.28	0.468	Malignant cells	PR vs. SD
PTBP3	-0.384422	1.78306e-108	6.01142e-104	0.283	0.506	Malignant cells	PR vs. SD
PIK3IP1	-0.385119	4.11771e-122	1.38824e-117	0.17	0.387	Malignant cells	PR vs. SD
HNRNPF	-0.386096	3.84319e-52	1.29569e-47	0.673	0.672	Malignant cells	PR vs. SD
UBE2M	-0.38624	7.59254e-73	2.55975e-68	0.36	0.5	Malignant cells	PR vs. SD
NAA20	-0.38648	8.59959e-61	2.89927e-56	0.502	0.572	Malignant cells	PR vs. SD
PSENEN	-0.386978	1.30115e-40	4.38671e-36	0.45	0.568	Malignant cells	PR vs. SD
BLMH	-0.387001	8.91699e-152	3.00627e-147	0.144	0.383	Malignant cells	PR vs. SD
PTGES3	-0.387846	9.24575e-64	3.11711e-59	0.829	0.772	Malignant cells	PR vs. SD
GDI2	-0.388116	2.34515e-48	7.90645e-44	0.722	0.682	Malignant cells	PR vs. SD
AHNAK	-0.38814	1.21452e-56	4.09465e-52	0.444	0.569	Malignant cells	PR vs. SD
AC011632.1	-0.38902	0	0	0.042	0.347	Malignant cells	PR vs. SD
ECH1	-0.389072	4.82676e-94	1.6273e-89	0.509	0.686	Malignant cells	PR vs. SD
RMND5A	-0.389974	5.32411e-50	1.79497e-45	0.223	0.364	Malignant cells	PR vs. SD
TPST2	-0.39054	2.72614e-139	9.19091e-135	0.162	0.392	Malignant cells	PR vs. SD
KLHL5	-0.391109	1.42695e-257	4.81082e-253	0.091	0.387	Malignant cells	PR vs. SD
EFR3A	-0.391271	7.49536e-115	2.52699e-110	0.26	0.47	Malignant cells	PR vs. SD
CLTC	-0.391928	2.05339e-49	6.92279e-45	0.492	0.559	Malignant cells	PR vs. SD
PARD3	-0.391994	1.11117e-138	3.74621e-134	0.202	0.443	Malignant cells	PR vs. SD
SNAI2	-0.39226	0	0	0.02	0.297	Malignant cells	PR vs. SD
C15orf41	-0.392599	1.3759e-270	4.63871e-266	0.066	0.352	Malignant cells	PR vs. SD
GALNT1	-0.392695	1.45176e-100	4.89447e-96	0.244	0.446	Malignant cells	PR vs. SD
GTSF1	-0.393423	6.26593e-86	2.1125e-81	0.149	0.338	Malignant cells	PR vs. SD
CDC42SE1	-0.393649	4.89312e-73	1.64967e-68	0.357	0.511	Malignant cells	PR vs. SD
SHKBP1	-0.393785	1.57265e-124	5.30205e-120	0.276	0.519	Malignant cells	PR vs. SD
PLXNB2	-0.394089	8.46361e-83	2.85342e-78	0.35	0.522	Malignant cells	PR vs. SD
GADD45B	-0.394355	3.11402e-60	1.04986e-55	0.292	0.46	Malignant cells	PR vs. SD
OAS2	-0.394502	2.03367e-232	6.8563e-228	0.095	0.387	Malignant cells	PR vs. SD
DNM1L	-0.394956	1.30742e-109	4.40784e-105	0.263	0.464	Malignant cells	PR vs. SD
GNB4	-0.395071	0	0	0.039	0.376	Malignant cells	PR vs. SD
KRAS	-0.395289	3.22445e-75	1.08709e-70	0.454	0.581	Malignant cells	PR vs. SD
YWHAG	-0.39694	1.26205e-72	4.25486e-68	0.383	0.525	Malignant cells	PR vs. SD
ITM2B	-0.39786	4.27108e-87	1.43995e-82	0.842	0.781	Malignant cells	PR vs. SD
MSRB2	-0.397906	1.83384e-50	6.1826e-46	0.28	0.404	Malignant cells	PR vs. SD
TSC22D1	-0.398088	2.21172e-75	7.45658e-71	0.372	0.533	Malignant cells	PR vs. SD
FOSL2	-0.398184	9.83235e-116	3.31488e-111	0.201	0.436	Malignant cells	PR vs. SD
ARPC5L	-0.398761	4.31219e-69	1.45381e-64	0.455	0.582	Malignant cells	PR vs. SD
SDCCAG8	-0.399031	3.03351e-63	1.02272e-58	0.359	0.48	Malignant cells	PR vs. SD
RNMT	-0.399477	7.96835e-77	2.68645e-72	0.34	0.493	Malignant cells	PR vs. SD
LDHA	-0.400032	9.68612e-44	3.26558e-39	0.751	0.728	Malignant cells	PR vs. SD
MOB1A	-0.400361	5.12568e-78	1.72807e-73	0.433	0.574	Malignant cells	PR vs. SD
SMIM26	-0.400842	1.73468e-43	5.8483e-39	0.655	0.636	Malignant cells	PR vs. SD
CLINT1	-0.400992	1.26717e-88	4.27215e-84	0.306	0.507	Malignant cells	PR vs. SD
NPTN	-0.401379	1.47144e-151	4.96081e-147	0.239	0.513	Malignant cells	PR vs. SD
SUPT16H	-0.401837	8.79443e-116	2.96495e-111	0.29	0.503	Malignant cells	PR vs. SD
HLA-C	-0.402865	4.84764e-68	1.63433e-63	0.781	0.776	Malignant cells	PR vs. SD
COTL1	-0.402902	1.97147e-42	6.64663e-38	0.147	0.272	Malignant cells	PR vs. SD
CTSD	-0.402903	1.89874e-65	6.40141e-61	0.546	0.633	Malignant cells	PR vs. SD
PHF5A	-0.403133	8.54996e-81	2.88253e-76	0.372	0.523	Malignant cells	PR vs. SD
SMYD2	-0.403302	5.14302e-124	1.73392e-119	0.194	0.418	Malignant cells	PR vs. SD
AEBP2	-0.403495	4.36374e-139	1.47119e-134	0.225	0.463	Malignant cells	PR vs. SD
PSPH	-0.403593	2.07717e-202	7.00297e-198	0.187	0.485	Malignant cells	PR vs. SD
LIMK2	-0.403653	1.21911e-235	4.1101e-231	0.125	0.424	Malignant cells	PR vs. SD
SOD2	-0.403693	3.16302e-45	1.06638e-40	0.364	0.487	Malignant cells	PR vs. SD
CAPG	-0.403996	1.60975e-129	5.4271e-125	0.3	0.575	Malignant cells	PR vs. SD
ARF1	-0.404917	5.48586e-96	1.8495e-91	0.713	0.756	Malignant cells	PR vs. SD
S100A13	-0.405011	8.4909e-32	2.86262e-27	0.559	0.58	Malignant cells	PR vs. SD
TMEM97	-0.405287	1.24236e-48	4.18851e-44	0.329	0.436	Malignant cells	PR vs. SD
UGDH	-0.405288	1.78162e-122	6.00657e-118	0.258	0.481	Malignant cells	PR vs. SD
FAM83B	-0.405364	2.66039e-281	8.96925e-277	0.078	0.381	Malignant cells	PR vs. SD
RESF1	-0.405385	8.22469e-87	2.77287e-82	0.195	0.395	Malignant cells	PR vs. SD
PLIN2	-0.406393	3.2116e-135	1.08276e-130	0.165	0.412	Malignant cells	PR vs. SD
POLR2K	-0.406801	8.91865e-48	3.00683e-43	0.543	0.611	Malignant cells	PR vs. SD
PSME3	-0.406829	3.08799e-93	1.04108e-88	0.298	0.489	Malignant cells	PR vs. SD
PCNA	-0.407021	1.53437e-105	5.17297e-101	0.229	0.45	Malignant cells	PR vs. SD
DLG1	-0.407346	3.48291e-78	1.17423e-73	0.336	0.493	Malignant cells	PR vs. SD
ALG3	-0.407416	1.11687e-118	3.76541e-114	0.314	0.525	Malignant cells	PR vs. SD
C15orf48	-0.407599	8.47187e-15	2.85621e-10	0.452	0.332	Malignant cells	PR vs. SD
PRSS22	-0.408228	2.07788e-29	7.00536e-25	0.223	0.336	Malignant cells	PR vs. SD
PTPRK	-0.408365	9.43874e-270	3.18218e-265	0.101	0.415	Malignant cells	PR vs. SD
SEPTIN10	-0.409536	1.02198e-181	3.44551e-177	0.155	0.431	Malignant cells	PR vs. SD
MAP1LC3A	-0.410542	4.61994e-79	1.55757e-74	0.31	0.491	Malignant cells	PR vs. SD
ARNTL2	-0.410746	9.39473e-196	3.16734e-191	0.097	0.355	Malignant cells	PR vs. SD
SF3B4	-0.410819	5.57978e-158	1.88117e-153	0.282	0.549	Malignant cells	PR vs. SD
PRAME	-0.41256	7.13173e-180	2.40439e-175	0.118	0.38	Malignant cells	PR vs. SD
FBLN1	-0.412957	7.59244e-68	2.55971e-63	0.201	0.35	Malignant cells	PR vs. SD
RAP1B	-0.413341	1.3244e-66	4.46509e-62	0.544	0.621	Malignant cells	PR vs. SD
DNAJB6	-0.413585	1.68452e-53	5.6792e-49	0.595	0.627	Malignant cells	PR vs. SD
CHMP1B	-0.413771	9.21622e-48	3.10716e-43	0.356	0.474	Malignant cells	PR vs. SD
ATP11B	-0.414524	2.19912e-169	7.4141e-165	0.16	0.417	Malignant cells	PR vs. SD
NDUFA1	-0.414789	6.95641e-72	2.34528e-67	0.744	0.723	Malignant cells	PR vs. SD
SEC31A	-0.415397	2.09794e-102	7.07301e-98	0.354	0.556	Malignant cells	PR vs. SD
SLC38A2	-0.416073	1.41876e-36	4.78322e-32	0.372	0.459	Malignant cells	PR vs. SD
TBCB	-0.416325	9.31557e-78	3.14065e-73	0.57	0.66	Malignant cells	PR vs. SD
LCP1	-0.416663	1.93204e-115	6.51366e-111	0.113	0.314	Malignant cells	PR vs. SD
CXCL16	-0.417012	3.81876e-75	1.28746e-70	0.215	0.383	Malignant cells	PR vs. SD
KLF3	-0.417877	6.5226e-50	2.19903e-45	0.332	0.466	Malignant cells	PR vs. SD
ZFP36L1	-0.417915	1.04147e-152	3.51121e-148	0.519	0.751	Malignant cells	PR vs. SD
POF1B	-0.418107	3.25402e-289	1.09706e-284	0.056	0.343	Malignant cells	PR vs. SD
ECHDC3	-0.419007	0	0	0.066	0.386	Malignant cells	PR vs. SD
KATNBL1	-0.419365	4.88442e-53	1.64673e-48	0.266	0.413	Malignant cells	PR vs. SD
ATP1B1	-0.420144	4.49291e-45	1.51474e-40	0.494	0.566	Malignant cells	PR vs. SD
PDCD10	-0.420437	3.38923e-128	1.14265e-123	0.346	0.565	Malignant cells	PR vs. SD
TMEM230	-0.420975	1.94764e-92	6.56627e-88	0.484	0.615	Malignant cells	PR vs. SD
TAF10	-0.422201	6.12996e-88	2.06665e-83	0.507	0.617	Malignant cells	PR vs. SD
ARPC5	-0.422336	1.45365e-79	4.90083e-75	0.493	0.628	Malignant cells	PR vs. SD
RAB18	-0.42235	1.34476e-76	4.53373e-72	0.351	0.515	Malignant cells	PR vs. SD
PKM	-0.42278	5.08668e-84	1.71492e-79	0.777	0.763	Malignant cells	PR vs. SD
PSMC4	-0.424043	3.09228e-96	1.04253e-91	0.468	0.621	Malignant cells	PR vs. SD
BRD4	-0.424324	1.96997e-89	6.64154e-85	0.373	0.538	Malignant cells	PR vs. SD
HDGF	-0.424395	2.33426e-104	7.86974e-100	0.434	0.626	Malignant cells	PR vs. SD
PSMB3	-0.424472	8.52368e-71	2.87367e-66	0.694	0.693	Malignant cells	PR vs. SD
TSPAN6	-0.425083	1.43762e-132	4.84679e-128	0.216	0.454	Malignant cells	PR vs. SD
UBQLN1	-0.425278	1.03736e-97	3.49736e-93	0.336	0.517	Malignant cells	PR vs. SD
ACAP2	-0.425396	1.51503e-134	5.10778e-130	0.301	0.54	Malignant cells	PR vs. SD
NUP54	-0.425423	1.26154e-148	4.25316e-144	0.198	0.446	Malignant cells	PR vs. SD
COMT	-0.426445	4.14958e-71	1.39899e-66	0.654	0.664	Malignant cells	PR vs. SD
SFPQ	-0.426552	4.02458e-77	1.35685e-72	0.613	0.666	Malignant cells	PR vs. SD
WDR45B	-0.42658	5.38954e-71	1.81703e-66	0.396	0.536	Malignant cells	PR vs. SD
ITGA2	-0.426809	2.64163e-201	8.90597e-197	0.114	0.38	Malignant cells	PR vs. SD
IFI6	-0.428055	8.28918e-114	2.79461e-109	0.296	0.559	Malignant cells	PR vs. SD
MZT2B	-0.428569	9.24298e-61	3.11618e-56	0.776	0.737	Malignant cells	PR vs. SD
BCAP31	-0.429316	1.34063e-58	4.51979e-54	0.619	0.615	Malignant cells	PR vs. SD
SMAP1	-0.429912	6.39862e-90	2.15723e-85	0.323	0.498	Malignant cells	PR vs. SD
KPNA4	-0.430055	2.04338e-135	6.88906e-131	0.294	0.53	Malignant cells	PR vs. SD
IDS	-0.430092	5.85825e-97	1.97505e-92	0.343	0.553	Malignant cells	PR vs. SD
PLP2	-0.430099	7.95184e-45	2.68088e-40	0.699	0.658	Malignant cells	PR vs. SD
S100A4	-0.430705	1.23955e-83	4.17903e-79	0.24	0.455	Malignant cells	PR vs. SD
GLTP	-0.430942	2.89231e-89	9.75115e-85	0.382	0.559	Malignant cells	PR vs. SD
CD46	-0.431332	6.8762e-58	2.31824e-53	0.489	0.574	Malignant cells	PR vs. SD
CD99	-0.431593	1.2861e-34	4.33596e-30	0.655	0.631	Malignant cells	PR vs. SD
ARHGAP21	-0.431891	2.36496e-143	7.97324e-139	0.169	0.406	Malignant cells	PR vs. SD
UCHL1	-0.431936	5.64689e-247	1.90379e-242	0.032	0.259	Malignant cells	PR vs. SD
VCP	-0.433321	1.75781e-117	5.92626e-113	0.478	0.634	Malignant cells	PR vs. SD
HNRNPAB	-0.43366	8.23726e-54	2.77711e-49	0.527	0.606	Malignant cells	PR vs. SD
ZFAND5	-0.43427	7.70919e-17	2.59908e-12	0.685	0.632	Malignant cells	PR vs. SD
SLFN5	-0.434771	3.5588e-128	1.19981e-123	0.148	0.37	Malignant cells	PR vs. SD
MLF2	-0.434869	3.57454e-60	1.20512e-55	0.725	0.693	Malignant cells	PR vs. SD
WFDC2	-0.434939	6.10965e-196	2.05981e-191	0.77	0.339	Malignant cells	PR vs. SD
PSMD12	-0.43542	3.37e-104	1.13616e-99	0.354	0.527	Malignant cells	PR vs. SD
ADAR	-0.435452	3.16271e-77	1.06628e-72	0.407	0.564	Malignant cells	PR vs. SD
YEATS2	-0.436191	5.87436e-236	1.98048e-231	0.124	0.42	Malignant cells	PR vs. SD
WDR66	-0.436313	8.61552e-268	2.90464e-263	0.08	0.381	Malignant cells	PR vs. SD
RTL8C	-0.43636	4.43118e-76	1.49393e-71	0.338	0.489	Malignant cells	PR vs. SD
MMP14	-0.436428	5.62113e-106	1.89511e-101	0.199	0.394	Malignant cells	PR vs. SD
PGRMC1	-0.436951	1.37484e-110	4.63512e-106	0.344	0.525	Malignant cells	PR vs. SD
GNB2	-0.437893	1.73476e-95	5.84858e-91	0.618	0.69	Malignant cells	PR vs. SD
IL32	-0.438347	2.0922e-91	7.05364e-87	0.179	0.393	Malignant cells	PR vs. SD
PSMB5	-0.43835	2.45909e-58	8.29059e-54	0.68	0.659	Malignant cells	PR vs. SD
SMARCA2	-0.438868	4.44241e-176	1.49772e-171	0.184	0.456	Malignant cells	PR vs. SD
PLBD1	-0.439431	1.9779e-140	6.6683e-136	0.213	0.463	Malignant cells	PR vs. SD
FBXO32	-0.4397	7.91888e-177	2.66977e-172	0.135	0.412	Malignant cells	PR vs. SD
TNS4	-0.439765	3.5852e-303	1.20871e-298	0.058	0.361	Malignant cells	PR vs. SD
PMEPA1	-0.440067	3.82048e-137	1.28804e-132	0.1	0.316	Malignant cells	PR vs. SD
PUF60	-0.440815	5.17509e-105	1.74473e-100	0.437	0.598	Malignant cells	PR vs. SD
ENAH	-0.441334	1.53907e-83	5.18881e-79	0.334	0.495	Malignant cells	PR vs. SD
UBE2S	-0.441334	2.01037e-55	6.77776e-51	0.454	0.561	Malignant cells	PR vs. SD
ABHD17C	-0.441641	1.66356e-152	5.60851e-148	0.144	0.385	Malignant cells	PR vs. SD
C14orf119	-0.44221	5.21953e-119	1.75971e-114	0.277	0.491	Malignant cells	PR vs. SD
XRN2	-0.442907	1.46938e-67	4.95388e-63	0.489	0.575	Malignant cells	PR vs. SD
MYL6	-0.443429	9.96692e-106	3.36025e-101	0.922	0.891	Malignant cells	PR vs. SD
MAP2K2	-0.444012	3.02987e-88	1.02149e-83	0.452	0.576	Malignant cells	PR vs. SD
RBM8A	-0.444639	3.39206e-80	1.1436e-75	0.654	0.683	Malignant cells	PR vs. SD
NDRG2	-0.445109	4.6077e-96	1.55344e-91	0.123	0.302	Malignant cells	PR vs. SD
TGFB1	-0.445855	1.08926e-77	3.67235e-73	0.235	0.404	Malignant cells	PR vs. SD
MRPL52	-0.447637	1.28806e-59	4.34257e-55	0.601	0.624	Malignant cells	PR vs. SD
NSFL1C	-0.447936	3.48522e-140	1.17501e-135	0.325	0.558	Malignant cells	PR vs. SD
TM4SF1	-0.449001	2.92317e-153	9.85517e-149	0.206	0.522	Malignant cells	PR vs. SD
ABCA13	-0.450131	0	0	0.019	0.343	Malignant cells	PR vs. SD
PPFIBP1	-0.450231	6.73238e-125	2.26975e-120	0.209	0.418	Malignant cells	PR vs. SD
SDC1	-0.450708	2.47978e-93	8.36032e-89	0.396	0.578	Malignant cells	PR vs. SD
CDC42	-0.451129	3.95236e-115	1.3325e-110	0.593	0.723	Malignant cells	PR vs. SD
SVIL	-0.451595	1.12916e-100	3.80687e-96	0.226	0.451	Malignant cells	PR vs. SD
HIST1H1E	-0.452879	9.7352e-142	3.28213e-137	0.094	0.308	Malignant cells	PR vs. SD
SUMO2	-0.453574	1.49097e-139	5.02667e-135	0.885	0.843	Malignant cells	PR vs. SD
WDR72	-0.455366	0	0	0.04	0.391	Malignant cells	PR vs. SD
NDUFA6	-0.455436	3.97206e-83	1.33914e-78	0.621	0.668	Malignant cells	PR vs. SD
NTN4	-0.455586	8.57755e-259	2.89183e-254	0.069	0.348	Malignant cells	PR vs. SD
NPL	-0.455964	0	0	0.049	0.367	Malignant cells	PR vs. SD
MYO1E	-0.456686	8.04209e-183	2.71131e-178	0.139	0.408	Malignant cells	PR vs. SD
TGM2	-0.456998	9.41433e-125	3.17395e-120	0.093	0.288	Malignant cells	PR vs. SD
COX6C	-0.457133	1.18884e-119	4.00806e-115	0.871	0.817	Malignant cells	PR vs. SD
ADH5	-0.457315	1.7522e-121	5.90737e-117	0.361	0.563	Malignant cells	PR vs. SD
C1orf21	-0.457368	0	0	0.073	0.405	Malignant cells	PR vs. SD
FAM135A	-0.4587	1.23811e-267	4.17417e-263	0.097	0.403	Malignant cells	PR vs. SD
TRIM29	-0.458792	9.42507e-193	3.17757e-188	0.211	0.518	Malignant cells	PR vs. SD
GALNT8	-0.459483	0	0	0	0.318	Malignant cells	PR vs. SD
EGR1	-0.460023	1.85015e-41	6.23761e-37	0.52	0.613	Malignant cells	PR vs. SD
CHIC2	-0.460081	2.5868e-219	8.72114e-215	0.149	0.448	Malignant cells	PR vs. SD
GNAS	-0.460391	1.20859e-123	4.07462e-119	0.707	0.796	Malignant cells	PR vs. SD
TPI1	-0.461042	7.61248e-112	2.56647e-107	0.909	0.854	Malignant cells	PR vs. SD
C9orf16	-0.461064	2.26622e-51	7.64032e-47	0.713	0.691	Malignant cells	PR vs. SD
ANKRD12	-0.461258	7.71681e-96	2.60165e-91	0.321	0.508	Malignant cells	PR vs. SD
DUSP5	-0.462528	1.25944e-18	4.24607e-14	0.236	0.316	Malignant cells	PR vs. SD
CD164	-0.46367	8.83637e-86	2.97909e-81	0.471	0.593	Malignant cells	PR vs. SD
ZNF385A	-0.463827	1.55401e-154	5.23918e-150	0.197	0.448	Malignant cells	PR vs. SD
RAI14	-0.464074	1.33533e-118	4.50193e-114	0.186	0.413	Malignant cells	PR vs. SD
ABI1	-0.464341	2.1146e-127	7.12916e-123	0.263	0.48	Malignant cells	PR vs. SD
OPTN	-0.464343	6.32554e-112	2.13259e-107	0.304	0.506	Malignant cells	PR vs. SD
A4GALT	-0.464782	3.74117e-125	1.2613e-120	0.204	0.423	Malignant cells	PR vs. SD
FNTA	-0.464992	8.46354e-115	2.8534e-110	0.426	0.605	Malignant cells	PR vs. SD
CCT6A	-0.466085	9.80037e-67	3.3041e-62	0.657	0.661	Malignant cells	PR vs. SD
ITGB1	-0.466172	1.83657e-18	6.19181e-14	0.556	0.54	Malignant cells	PR vs. SD
NENF	-0.467688	2.37141e-64	7.99498e-60	0.597	0.633	Malignant cells	PR vs. SD
COL17A1	-0.468362	1.0636e-191	3.58583e-187	0.079	0.326	Malignant cells	PR vs. SD
EIF4EBP1	-0.468436	6.10861e-113	2.05946e-108	0.481	0.638	Malignant cells	PR vs. SD
SLC25A1	-0.46875	2.35035e-117	7.92396e-113	0.325	0.53	Malignant cells	PR vs. SD
MYL9	-0.469035	1.6717e-100	5.63599e-96	0.167	0.375	Malignant cells	PR vs. SD
G3BP2	-0.469668	4.09085e-124	1.37919e-119	0.32	0.536	Malignant cells	PR vs. SD
TNFAIP3	-0.469783	1.36004e-07	0.00458525	0.352	0.396	Malignant cells	PR vs. SD
MYH9	-0.470131	3.19894e-88	1.07849e-83	0.474	0.614	Malignant cells	PR vs. SD
AHCY	-0.470506	1.25946e-30	4.24613e-26	0.59	0.579	Malignant cells	PR vs. SD
TGIF1	-0.47096	2.31754e-70	7.81334e-66	0.337	0.49	Malignant cells	PR vs. SD
FGFR2	-0.47104	2.94033e-186	9.91304e-182	0.136	0.412	Malignant cells	PR vs. SD
AFDN	-0.472648	1.2076e-96	4.0713e-92	0.253	0.473	Malignant cells	PR vs. SD
MT1X	-0.472721	8.31192e-103	2.80228e-98	0.231	0.449	Malignant cells	PR vs. SD
PGAM1	-0.472871	1.29555e-62	4.36783e-58	0.56	0.617	Malignant cells	PR vs. SD
FAM107B	-0.473319	9.47804e-61	3.19543e-56	0.232	0.386	Malignant cells	PR vs. SD
LAMC2	-0.47336	4.92349e-180	1.65991e-175	0.144	0.41	Malignant cells	PR vs. SD
KRT10	-0.473388	4.0786e-64	1.37506e-59	0.713	0.704	Malignant cells	PR vs. SD
MRPS18C	-0.473606	1.31057e-61	4.41846e-57	0.495	0.572	Malignant cells	PR vs. SD
GATA3	-0.473699	0	0	0.036	0.359	Malignant cells	PR vs. SD
NUCKS1	-0.47401	4.18916e-71	1.41233e-66	0.651	0.69	Malignant cells	PR vs. SD
TMEM41A	-0.475209	7.38632e-83	2.49022e-78	0.318	0.478	Malignant cells	PR vs. SD
CNN2	-0.476585	9.01727e-95	3.04008e-90	0.437	0.592	Malignant cells	PR vs. SD
BMP2	-0.477263	8.10959e-298	2.73407e-293	0.019	0.257	Malignant cells	PR vs. SD
IMPA2	-0.477398	3.23048e-203	1.08912e-198	0.155	0.438	Malignant cells	PR vs. SD
POLR2H	-0.477666	1.04292e-91	3.51609e-87	0.517	0.624	Malignant cells	PR vs. SD
TAF15	-0.477879	3.21664e-139	1.08446e-134	0.356	0.579	Malignant cells	PR vs. SD
DNAJC19	-0.478063	5.61953e-74	1.89457e-69	0.528	0.603	Malignant cells	PR vs. SD
MFN1	-0.478239	4.22098e-247	1.42306e-242	0.146	0.458	Malignant cells	PR vs. SD
TLE5	-0.479485	1.42045e-97	4.78889e-93	0.562	0.676	Malignant cells	PR vs. SD
CNFN	-0.479499	7.34956e-40	2.47783e-35	0.163	0.285	Malignant cells	PR vs. SD
TPM3	-0.479715	1.39376e-116	4.69893e-112	0.592	0.727	Malignant cells	PR vs. SD
SERPINF1	-0.47981	9.66445e-11	3.25827e-06	0.417	0.416	Malignant cells	PR vs. SD
HNRNPU	-0.48013	4.6844e-91	1.5793e-86	0.727	0.73	Malignant cells	PR vs. SD
SYPL1	-0.480196	1.71635e-145	5.7865e-141	0.377	0.596	Malignant cells	PR vs. SD
ABCC5	-0.480637	4.10807e-145	1.385e-140	0.226	0.462	Malignant cells	PR vs. SD
DSP	-0.480655	2.92676e-143	9.86727e-139	0.331	0.611	Malignant cells	PR vs. SD
PABPN1	-0.482568	4.57606e-142	1.54277e-137	0.411	0.619	Malignant cells	PR vs. SD
ITGB4	-0.484473	3.23325e-176	1.09006e-171	0.189	0.464	Malignant cells	PR vs. SD
CIB1	-0.485566	5.454e-48	1.83876e-43	0.54	0.625	Malignant cells	PR vs. SD
PLD3	-0.485794	5.69266e-63	1.91922e-58	0.641	0.645	Malignant cells	PR vs. SD
ASS1	-0.486264	3.46845e-63	1.16935e-58	0.177	0.328	Malignant cells	PR vs. SD
SNRPG	-0.487219	3.22284e-102	1.08655e-97	0.721	0.739	Malignant cells	PR vs. SD
ST6GALNAC2	-0.488006	0	0	0.073	0.408	Malignant cells	PR vs. SD
CCNG2	-0.488181	1.06933e-123	3.60513e-119	0.191	0.413	Malignant cells	PR vs. SD
HSP90AA1	-0.488222	1.56447e-81	5.27444e-77	0.907	0.867	Malignant cells	PR vs. SD
CKAP4	-0.488856	6.44516e-101	2.17292e-96	0.316	0.486	Malignant cells	PR vs. SD
GIPC1	-0.490918	4.35773e-134	1.46917e-129	0.34	0.581	Malignant cells	PR vs. SD
DSTN	-0.49098	2.7523e-135	9.27911e-131	0.732	0.793	Malignant cells	PR vs. SD
H1FX	-0.493048	8.42949e-110	2.84192e-105	0.486	0.657	Malignant cells	PR vs. SD
DMKN	-0.493312	1.37835e-115	4.64696e-111	0.212	0.46	Malignant cells	PR vs. SD
ARL4D	-0.493652	1.07145e-282	3.61229e-278	0.081	0.386	Malignant cells	PR vs. SD
GGCT	-0.494066	9.60809e-60	3.23927e-55	0.532	0.583	Malignant cells	PR vs. SD
ERO1A	-0.494314	1.98891e-50	6.70543e-46	0.263	0.427	Malignant cells	PR vs. SD
UQCRFS1	-0.494806	5.16396e-102	1.74098e-97	0.787	0.755	Malignant cells	PR vs. SD
JAG1	-0.495536	5.07466e-82	1.71087e-77	0.277	0.437	Malignant cells	PR vs. SD
MCM3	-0.495908	3.19701e-134	1.07784e-129	0.192	0.427	Malignant cells	PR vs. SD
TUBA1C	-0.497601	7.01657e-87	2.36557e-82	0.638	0.694	Malignant cells	PR vs. SD
NCL	-0.497918	5.37912e-89	1.81352e-84	0.746	0.746	Malignant cells	PR vs. SD
SELENOM	-0.498098	4.10324e-124	1.38337e-119	0.285	0.549	Malignant cells	PR vs. SD
UBE2H	-0.498701	3.83778e-150	1.29387e-145	0.291	0.551	Malignant cells	PR vs. SD
PDLIM4	-0.499451	1.58303e-217	5.33702e-213	0.141	0.452	Malignant cells	PR vs. SD
BHLHE40	-0.499859	5.39777e-170	1.8198e-165	0.216	0.518	Malignant cells	PR vs. SD
PRRC2C	-0.50087	4.0325e-78	1.35952e-73	0.576	0.641	Malignant cells	PR vs. SD
EIF5A	-0.501297	2.71414e-144	9.15044e-140	0.458	0.667	Malignant cells	PR vs. SD
GAPDH	-0.502739	3.62913e-51	1.22353e-46	0.952	0.968	Malignant cells	PR vs. SD
PYCR2	-0.502836	3.97059e-132	1.33864e-127	0.314	0.531	Malignant cells	PR vs. SD
DVL3	-0.504344	9.21814e-207	3.1078e-202	0.214	0.508	Malignant cells	PR vs. SD
HSPH1	-0.50435	7.63425e-65	2.57381e-60	0.399	0.535	Malignant cells	PR vs. SD
HNRNPD	-0.505002	1.43859e-96	4.85006e-92	0.579	0.671	Malignant cells	PR vs. SD
PHF3	-0.505401	2.90219e-92	9.78445e-88	0.373	0.539	Malignant cells	PR vs. SD
MCL1	-0.505891	1.41067e-62	4.75593e-58	0.617	0.666	Malignant cells	PR vs. SD
SENP6	-0.506233	5.9055e-137	1.99098e-132	0.269	0.488	Malignant cells	PR vs. SD
ISG15	-0.507509	9.29439e-34	3.13351e-29	0.414	0.509	Malignant cells	PR vs. SD
EIF4A3	-0.508569	3.44158e-138	1.16029e-133	0.366	0.567	Malignant cells	PR vs. SD
ADSS	-0.510169	1.73636e-145	5.85397e-141	0.332	0.568	Malignant cells	PR vs. SD
PIK3CA	-0.510552	3.28935e-253	1.10897e-248	0.136	0.446	Malignant cells	PR vs. SD
AL135905.2	-0.51073	0	0	0.087	0.437	Malignant cells	PR vs. SD
DDX5	-0.514152	1.13455e-132	3.82502e-128	0.831	0.8	Malignant cells	PR vs. SD
TMPRSS4	-0.514346	9.75784e-261	3.28976e-256	0.124	0.466	Malignant cells	PR vs. SD
FERMT1	-0.515121	1.23501e-184	4.16373e-180	0.187	0.454	Malignant cells	PR vs. SD
NORAD	-0.515663	6.88457e-78	2.32107e-73	0.498	0.595	Malignant cells	PR vs. SD
UBL5	-0.516355	6.09601e-119	2.05521e-114	0.824	0.79	Malignant cells	PR vs. SD
UBC	-0.517224	6.71214e-188	2.26293e-183	0.925	0.913	Malignant cells	PR vs. SD
PLK2	-0.517513	6.69833e-154	2.25828e-149	0.123	0.356	Malignant cells	PR vs. SD
PFN1	-0.517543	5.48156e-155	1.84805e-150	0.9	0.872	Malignant cells	PR vs. SD
SNRPB	-0.51937	1.41667e-98	4.77616e-94	0.708	0.717	Malignant cells	PR vs. SD
SRSF9	-0.519484	1.09453e-117	3.6901e-113	0.747	0.751	Malignant cells	PR vs. SD
MORN2	-0.520313	2.5124e-17	8.47031e-13	0.268	0.368	Malignant cells	PR vs. SD
RIOK3	-0.523434	8.4359e-164	2.84408e-159	0.243	0.523	Malignant cells	PR vs. SD
XRCC6	-0.52471	1.83293e-114	6.17955e-110	0.569	0.671	Malignant cells	PR vs. SD
ZNF639	-0.524954	1.02671e-206	3.46144e-202	0.197	0.475	Malignant cells	PR vs. SD
ETS2	-0.527664	6.18283e-133	2.08448e-128	0.291	0.523	Malignant cells	PR vs. SD
PPP4R1	-0.527963	3.46218e-210	1.16724e-205	0.2	0.51	Malignant cells	PR vs. SD
BLVRB	-0.528301	2.34852e-71	7.91781e-67	0.492	0.601	Malignant cells	PR vs. SD
NDUFV2	-0.52851	1.68533e-101	5.68194e-97	0.642	0.672	Malignant cells	PR vs. SD
ELF3	-0.528823	1.76095e-101	5.93686e-97	0.5	0.709	Malignant cells	PR vs. SD
DYNLT1	-0.530558	3.83395e-96	1.29258e-91	0.467	0.645	Malignant cells	PR vs. SD
ATXN10	-0.53186	6.46745e-113	2.18043e-108	0.376	0.54	Malignant cells	PR vs. SD
PABPC1	-0.532271	5.76993e-122	1.94527e-117	0.918	0.896	Malignant cells	PR vs. SD
HIST1H4C	-0.532557	7.09015e-68	2.39037e-63	0.418	0.561	Malignant cells	PR vs. SD
MYO6	-0.532719	1.79473e-117	6.05075e-113	0.306	0.511	Malignant cells	PR vs. SD
RBP1	-0.534175	7.40944e-188	2.49802e-183	0.133	0.414	Malignant cells	PR vs. SD
RNF7	-0.538848	1.42977e-101	4.82034e-97	0.655	0.696	Malignant cells	PR vs. SD
OSTF1	-0.539904	4.6668e-245	1.57337e-240	0.2	0.524	Malignant cells	PR vs. SD
CTSC	-0.540164	1.10223e-123	3.71606e-119	0.353	0.558	Malignant cells	PR vs. SD
TM2D2	-0.540398	5.11088e-164	1.72308e-159	0.226	0.479	Malignant cells	PR vs. SD
BIK	-0.543062	3.84729e-73	1.29708e-68	0.267	0.422	Malignant cells	PR vs. SD
RBX1	-0.543155	1.5595e-102	5.2577e-98	0.643	0.698	Malignant cells	PR vs. SD
TUBA1A	-0.544957	1.17592e-46	3.96449e-42	0.516	0.3	Malignant cells	PR vs. SD
F11R	-0.545197	1.77864e-109	5.99652e-105	0.469	0.607	Malignant cells	PR vs. SD
GJB2	-0.545777	1.1222e-209	3.7834e-205	0.05	0.28	Malignant cells	PR vs. SD
PTPRZ1	-0.546561	0	0	0.042	0.383	Malignant cells	PR vs. SD
CTSH	-0.546685	4.52662e-47	1.5261e-42	0.339	0.447	Malignant cells	PR vs. SD
MUC20	-0.547064	2.05974e-89	6.94422e-85	0.179	0.376	Malignant cells	PR vs. SD
NIBAN2	-0.548602	3.28951e-98	1.10903e-93	0.196	0.421	Malignant cells	PR vs. SD
CDK2AP1	-0.549042	1.13921e-138	3.84073e-134	0.392	0.593	Malignant cells	PR vs. SD
APOL1	-0.549156	1.29627e-96	4.37025e-92	0.108	0.281	Malignant cells	PR vs. SD
VAPA	-0.549933	8.37011e-130	2.8219e-125	0.619	0.691	Malignant cells	PR vs. SD
AOPEP	-0.55141	2.65648e-205	8.95607e-201	0.193	0.484	Malignant cells	PR vs. SD
KLHL24	-0.554615	7.54717e-133	2.54445e-128	0.26	0.498	Malignant cells	PR vs. SD
PSMD11	-0.555245	1.2514e-147	4.21898e-143	0.421	0.612	Malignant cells	PR vs. SD
LRP10	-0.557311	4.6445e-139	1.56585e-134	0.309	0.539	Malignant cells	PR vs. SD
ITGA6	-0.557784	4.6733e-159	1.57555e-154	0.181	0.424	Malignant cells	PR vs. SD
TMEM98	-0.559517	1.11057e-285	3.74419e-281	0.108	0.438	Malignant cells	PR vs. SD
CHMP4B	-0.559635	4.03713e-117	1.36108e-112	0.466	0.642	Malignant cells	PR vs. SD
MUC16	-0.560783	2.46897e-48	8.3239e-44	0.22	0.35	Malignant cells	PR vs. SD
LSM1	-0.56114	3.18989e-111	1.07544e-106	0.467	0.61	Malignant cells	PR vs. SD
HNRNPK	-0.561243	2.77697e-159	9.36228e-155	0.7	0.765	Malignant cells	PR vs. SD
YES1	-0.562813	1.1473e-210	3.868e-206	0.183	0.469	Malignant cells	PR vs. SD
B3GNT5	-0.562899	2.10932e-200	7.11137e-196	0.225	0.512	Malignant cells	PR vs. SD
TACSTD2	-0.566012	1.34312e-34	4.52821e-30	0.739	0.696	Malignant cells	PR vs. SD
LSM14A	-0.56635	1.77176e-150	5.97331e-146	0.435	0.65	Malignant cells	PR vs. SD
SELENOP	-0.568754	3.2061e-82	1.08091e-77	0.339	0.523	Malignant cells	PR vs. SD
GJB6	-0.569374	1.39945e-227	4.7181e-223	0.042	0.272	Malignant cells	PR vs. SD
EZR	-0.57265	2.22398e-83	7.49791e-79	0.536	0.691	Malignant cells	PR vs. SD
ATP1B3	-0.572993	1.50429e-137	5.07156e-133	0.38	0.588	Malignant cells	PR vs. SD
HNRNPA2B1	-0.575496	1.51016e-149	5.09136e-145	0.825	0.806	Malignant cells	PR vs. SD
JUNB	-0.580508	1.36264e-89	4.59401e-85	0.771	0.787	Malignant cells	PR vs. SD
MBD2	-0.581874	1.36207e-248	4.59209e-244	0.201	0.526	Malignant cells	PR vs. SD
GPR87	-0.581942	0	0	0.091	0.434	Malignant cells	PR vs. SD
SLC6A8	-0.583372	6.22062e-51	2.09722e-46	0.252	0.392	Malignant cells	PR vs. SD
MIF	-0.583804	1.99263e-176	6.71795e-172	0.945	0.905	Malignant cells	PR vs. SD
RALBP1	-0.585135	8.02886e-145	2.70685e-140	0.403	0.596	Malignant cells	PR vs. SD
YWHAH	-0.586351	1.20713e-178	4.06972e-174	0.393	0.649	Malignant cells	PR vs. SD
UPK1B	-0.588672	0	0	0.003	0.305	Malignant cells	PR vs. SD
DSC3	-0.589863	0	0	0.035	0.363	Malignant cells	PR vs. SD
TSPO	-0.592216	3.21239e-106	1.08303e-101	0.714	0.738	Malignant cells	PR vs. SD
MAP3K13	-0.592738	2.83873e-100	9.57048e-96	0.47	0.615	Malignant cells	PR vs. SD
CALD1	-0.593363	3.7575e-98	1.2668e-93	0.289	0.454	Malignant cells	PR vs. SD
B2M	-0.595648	6.24981e-100	2.10706e-95	0.964	0.951	Malignant cells	PR vs. SD
FAM3C	-0.595927	3.84287e-158	1.29558e-153	0.299	0.552	Malignant cells	PR vs. SD
SEC61G	-0.596209	9.46294e-135	3.19033e-130	0.724	0.742	Malignant cells	PR vs. SD
MXRA5	-0.598236	0	0	0.012	0.269	Malignant cells	PR vs. SD
CYB5R3	-0.598264	4.23992e-171	1.42945e-166	0.387	0.606	Malignant cells	PR vs. SD
RBM42	-0.598905	7.5283e-191	2.53809e-186	0.355	0.64	Malignant cells	PR vs. SD
TUBB6	-0.600425	0	0	0.078	0.441	Malignant cells	PR vs. SD
MXRA7	-0.601124	1.34628e-249	4.53885e-245	0.204	0.525	Malignant cells	PR vs. SD
TP63	-0.601147	1.68093e-266	5.6671e-262	0.13	0.455	Malignant cells	PR vs. SD
DHRS3	-0.605354	2.91827e-295	9.83866e-291	0.124	0.469	Malignant cells	PR vs. SD
ATP5F1C	-0.606087	1.68926e-120	5.69518e-116	0.704	0.717	Malignant cells	PR vs. SD
ANXA8L1	-0.606343	0	0	0.04	0.322	Malignant cells	PR vs. SD
TUSC3	-0.607013	6.76197e-289	2.27973e-284	0.114	0.453	Malignant cells	PR vs. SD
SERPINB5	-0.607061	0	0	0.089	0.488	Malignant cells	PR vs. SD
SYNGR2	-0.608139	4.67038e-85	1.57457e-80	0.643	0.666	Malignant cells	PR vs. SD
DAZAP2	-0.609335	2.55331e-158	8.60823e-154	0.588	0.709	Malignant cells	PR vs. SD
DSG2	-0.609546	3.98003e-202	1.34183e-197	0.22	0.535	Malignant cells	PR vs. SD
CASC9	-0.613773	0	0	0.062	0.46	Malignant cells	PR vs. SD
MRPL47	-0.614782	1.26712e-179	4.27197e-175	0.387	0.62	Malignant cells	PR vs. SD
LAMB3	-0.614894	5.35272e-155	1.80462e-150	0.176	0.437	Malignant cells	PR vs. SD
STK38L	-0.616405	9.96867e-219	3.36084e-214	0.188	0.474	Malignant cells	PR vs. SD
LAPTM4B	-0.622531	3.0527e-180	1.02919e-175	0.241	0.514	Malignant cells	PR vs. SD
SMS	-0.622585	2.46551e-137	8.31224e-133	0.458	0.637	Malignant cells	PR vs. SD
AKR1C1	-0.623654	0	0	0.026	0.286	Malignant cells	PR vs. SD
S100A6	-0.623984	1.17339e-233	3.95596e-229	0.934	0.955	Malignant cells	PR vs. SD
SKIL	-0.624722	1.47079e-152	4.95863e-148	0.184	0.431	Malignant cells	PR vs. SD
IGFBP4	-0.625116	6.66196e-249	2.24601e-244	0.15	0.494	Malignant cells	PR vs. SD
DAD1	-0.62679	2.55548e-100	8.61554e-96	0.626	0.678	Malignant cells	PR vs. SD
CEBPG	-0.626916	2.31054e-172	7.78976e-168	0.353	0.604	Malignant cells	PR vs. SD
LBH	-0.627032	2.86555e-251	9.66091e-247	0.126	0.448	Malignant cells	PR vs. SD
GABARAPL1	-0.628092	4.50499e-193	1.51881e-188	0.234	0.51	Malignant cells	PR vs. SD
PPIA	-0.628724	1.3694e-218	4.61679e-214	0.937	0.893	Malignant cells	PR vs. SD
NDUFB5	-0.629875	1.02895e-129	3.46899e-125	0.722	0.716	Malignant cells	PR vs. SD
FOS	-0.629914	8.54234e-51	2.87997e-46	0.774	0.739	Malignant cells	PR vs. SD
PRKDC	-0.631264	1.50413e-158	5.07103e-154	0.347	0.575	Malignant cells	PR vs. SD
PDCD5	-0.632561	1.74821e-136	5.89391e-132	0.774	0.765	Malignant cells	PR vs. SD
PAK2	-0.632909	5.0883e-207	1.71547e-202	0.358	0.633	Malignant cells	PR vs. SD
PCBP1	-0.638461	3.00191e-180	1.01206e-175	0.693	0.784	Malignant cells	PR vs. SD
DAB2	-0.641289	0	0	0.024	0.309	Malignant cells	PR vs. SD
JUND	-0.642049	2.8683e-144	9.67019e-140	0.609	0.751	Malignant cells	PR vs. SD
NTRK2	-0.643189	0	0	0.022	0.291	Malignant cells	PR vs. SD
BCL3	-0.64355	1.87565e-223	6.32356e-219	0.201	0.515	Malignant cells	PR vs. SD
UBALD2	-0.643654	2.42151e-152	8.16387e-148	0.407	0.621	Malignant cells	PR vs. SD
GSN	-0.646479	3.68404e-130	1.24204e-125	0.465	0.65	Malignant cells	PR vs. SD
MT-ND5	-0.646793	3.43625e-18	1.1585e-13	0.814	0.666	Malignant cells	PR vs. SD
KLF5	-0.649023	1.62628e-216	5.48285e-212	0.283	0.623	Malignant cells	PR vs. SD
H2AFJ	-0.650027	4.17111e-101	1.40625e-96	0.529	0.668	Malignant cells	PR vs. SD
A2ML1	-0.650487	0	0	0.022	0.332	Malignant cells	PR vs. SD
KRT23	-0.651162	0	0	0.013	0.265	Malignant cells	PR vs. SD
CALM1	-0.651426	8.60723e-117	2.90184e-112	0.704	0.79	Malignant cells	PR vs. SD
AP2M1	-0.651475	2.89597e-161	9.76347e-157	0.611	0.714	Malignant cells	PR vs. SD
CD109	-0.654157	8.53949e-300	2.879e-295	0.071	0.377	Malignant cells	PR vs. SD
USP14	-0.654595	2.26476e-163	7.63541e-159	0.288	0.519	Malignant cells	PR vs. SD
HSPA1B	-0.658515	9.49695e-257	3.2018e-252	0.293	0.66	Malignant cells	PR vs. SD
LY6E	-0.659948	1.43376e-89	4.83377e-85	0.863	0.81	Malignant cells	PR vs. SD
ACTL6A	-0.661262	1.09207e-210	3.68179e-206	0.293	0.584	Malignant cells	PR vs. SD
HSPB1	-0.662273	1.09244e-149	3.68306e-145	0.872	0.862	Malignant cells	PR vs. SD
GSTA4	-0.662887	0	0	0.134	0.484	Malignant cells	PR vs. SD
FXYD5	-0.66331	2.43013e-75	8.19295e-71	0.616	0.654	Malignant cells	PR vs. SD
PLPP1	-0.664563	2.37368e-259	8.00262e-255	0.14	0.448	Malignant cells	PR vs. SD
PALLD	-0.665102	0	0	0.13	0.484	Malignant cells	PR vs. SD
NLRP2	-0.665488	0	0	0.039	0.348	Malignant cells	PR vs. SD
GJA1	-0.666332	0	0	0.034	0.399	Malignant cells	PR vs. SD
TWF1	-0.667841	2.38939e-209	8.0556e-205	0.397	0.633	Malignant cells	PR vs. SD
ZFP36L2	-0.668119	2.74458e-96	9.25307e-92	0.46	0.612	Malignant cells	PR vs. SD
TACC1	-0.6704	0	0	0.121	0.499	Malignant cells	PR vs. SD
TPM4	-0.670856	3.846e-139	1.29664e-134	0.436	0.632	Malignant cells	PR vs. SD
CRABP2	-0.672531	3.50898e-173	1.18302e-168	0.114	0.369	Malignant cells	PR vs. SD
ITGB6	-0.676898	2.2629e-153	7.62916e-149	0.116	0.339	Malignant cells	PR vs. SD
LTBR	-0.6782	3.20765e-141	1.08143e-136	0.516	0.634	Malignant cells	PR vs. SD
H1F0	-0.678932	8.5514e-92	2.88302e-87	0.519	0.646	Malignant cells	PR vs. SD
ALDH1A1	-0.679178	0	0	0.085	0.455	Malignant cells	PR vs. SD
COX6B1	-0.679403	1.27961e-273	4.31407e-269	0.901	0.892	Malignant cells	PR vs. SD
ODF3B	-0.680176	2.61819e-129	8.82696e-125	0.256	0.48	Malignant cells	PR vs. SD
LPIN2	-0.680467	5.08238e-96	1.71347e-91	0.22	0.431	Malignant cells	PR vs. SD
PGK1	-0.681801	1.15224e-137	3.88466e-133	0.668	0.726	Malignant cells	PR vs. SD
MMP7	-0.684006	9.24561e-115	3.11707e-110	0.102	0.294	Malignant cells	PR vs. SD
YBX3	-0.686934	1.23106e-219	4.1504e-215	0.796	0.809	Malignant cells	PR vs. SD
UBA2	-0.68873	3.21426e-164	1.08366e-159	0.467	0.646	Malignant cells	PR vs. SD
ROMO1	-0.691804	5.97099e-178	2.01306e-173	0.626	0.734	Malignant cells	PR vs. SD
COX7A2	-0.693029	2.38023e-135	8.02471e-131	0.836	0.823	Malignant cells	PR vs. SD
CCNI	-0.693853	1.83136e-241	6.17426e-237	0.838	0.836	Malignant cells	PR vs. SD
SEM1	-0.694418	8.88454e-216	2.99533e-211	0.778	0.801	Malignant cells	PR vs. SD
EIF4G1	-0.695781	1.41618e-176	4.7745e-172	0.434	0.634	Malignant cells	PR vs. SD
SERTAD1	-0.696706	8.38717e-116	2.82765e-111	0.359	0.574	Malignant cells	PR vs. SD
EGLN3	-0.696778	1.25226e-263	4.22188e-259	0.038	0.286	Malignant cells	PR vs. SD
IFI16	-0.698969	2.8508e-280	9.6112e-276	0.22	0.587	Malignant cells	PR vs. SD
MX1	-0.700272	9.30027e-216	3.13549e-211	0.19	0.508	Malignant cells	PR vs. SD
ACTR3	-0.701697	2.63326e-240	8.87776e-236	0.433	0.689	Malignant cells	PR vs. SD
MT-ATP8	-0.710936	3.71279e-287	1.25173e-282	0.15	0.511	Malignant cells	PR vs. SD
IGFBP7	-0.711378	1.69549e-184	5.71617e-180	0.092	0.348	Malignant cells	PR vs. SD
NQO1	-0.71272	1.05034e-81	3.54112e-77	0.181	0.368	Malignant cells	PR vs. SD
PKP1	-0.713344	0	0	0.057	0.489	Malignant cells	PR vs. SD
SRI	-0.714975	1.88117e-184	6.34218e-180	0.445	0.681	Malignant cells	PR vs. SD
ANXA8	-0.716572	0	0	0.041	0.321	Malignant cells	PR vs. SD
ACTB	-0.719288	0	0	0.981	0.985	Malignant cells	PR vs. SD
CD81	-0.721483	4.18409e-211	1.41062e-206	0.403	0.657	Malignant cells	PR vs. SD
DNAJB1	-0.724073	2.06164e-205	6.95061e-201	0.497	0.753	Malignant cells	PR vs. SD
URI1	-0.7246	8.21684e-210	2.77023e-205	0.395	0.634	Malignant cells	PR vs. SD
IGFBP2	-0.729883	2.16364e-100	7.2945e-96	0.629	0.707	Malignant cells	PR vs. SD
CD24	-0.740745	5.92593e-19	1.99787e-14	0.71	0.661	Malignant cells	PR vs. SD
MT-ND6	-0.740834	1.5575e-112	5.25096e-108	0.36	0.548	Malignant cells	PR vs. SD
ADAM9	-0.744403	1.53676e-233	5.18104e-229	0.194	0.495	Malignant cells	PR vs. SD
ACTN4	-0.746844	6.95025e-203	2.34321e-198	0.489	0.727	Malignant cells	PR vs. SD
ARF5	-0.748323	8.02272e-299	2.70478e-294	0.354	0.71	Malignant cells	PR vs. SD
CFB	-0.748682	8.07839e-149	2.72355e-144	0.079	0.283	Malignant cells	PR vs. SD
IRF6	-0.750756	4.39457e-270	1.48158e-265	0.24	0.564	Malignant cells	PR vs. SD
THOC3	-0.750818	0	0	0.211	0.569	Malignant cells	PR vs. SD
GLUL	-0.753879	4.23652e-139	1.4283e-134	0.696	0.752	Malignant cells	PR vs. SD
EMP1	-0.757133	1.34673e-224	4.54036e-220	0.16	0.488	Malignant cells	PR vs. SD
PFN2	-0.758295	2.87511e-264	9.69314e-260	0.29	0.599	Malignant cells	PR vs. SD
TSPAN1	-0.761543	9.16555e-29	3.09007e-24	0.208	0.313	Malignant cells	PR vs. SD
NET1	-0.763089	1.78236e-166	6.00906e-162	0.363	0.593	Malignant cells	PR vs. SD
MIR205HG	-0.766338	7.78566e-29	2.62486e-24	0.598	0.595	Malignant cells	PR vs. SD
ITPKC	-0.766855	2.11423e-178	7.12792e-174	0.216	0.495	Malignant cells	PR vs. SD
TUBB4B	-0.767304	2.17635e-63	7.33734e-59	0.662	0.718	Malignant cells	PR vs. SD
OAS1	-0.769152	1.44855e-156	4.88365e-152	0.236	0.485	Malignant cells	PR vs. SD
RPL22L1	-0.782054	3.92911e-130	1.32466e-125	0.656	0.697	Malignant cells	PR vs. SD
YWHAZ	-0.783608	0	0	0.768	0.872	Malignant cells	PR vs. SD
NRARP	-0.788758	7.74314e-219	2.61052e-214	0.154	0.444	Malignant cells	PR vs. SD
HEBP2	-0.800068	5.3941e-200	1.81857e-195	0.458	0.686	Malignant cells	PR vs. SD
NDRG1	-0.803883	2.12373e-200	7.15994e-196	0.175	0.487	Malignant cells	PR vs. SD
CLU	-0.80596	2.01957e-230	6.80879e-226	0.09	0.365	Malignant cells	PR vs. SD
KLHDC7B	-0.809858	0	0	0.01	0.342	Malignant cells	PR vs. SD
PSMD2	-0.810064	8.49427e-267	2.86376e-262	0.395	0.681	Malignant cells	PR vs. SD
RND3	-0.810796	9.58126e-173	3.23022e-168	0.299	0.574	Malignant cells	PR vs. SD
ZFP36	-0.822558	7.07754e-172	2.38612e-167	0.735	0.828	Malignant cells	PR vs. SD
SERPINB13	-0.822925	0	0	0.008	0.349	Malignant cells	PR vs. SD
FXR1	-0.825081	2.16471e-213	7.29811e-209	0.571	0.697	Malignant cells	PR vs. SD
ATF3	-0.825102	1.52096e-21	5.12777e-17	0.595	0.561	Malignant cells	PR vs. SD
FKBP1A	-0.845491	2.68465e-206	9.05103e-202	0.764	0.779	Malignant cells	PR vs. SD
BTG1	-0.85189	1.95199e-188	6.58094e-184	0.737	0.786	Malignant cells	PR vs. SD
DBI	-0.868539	6.10447e-177	2.05806e-172	0.656	0.747	Malignant cells	PR vs. SD
DSG3	-0.869011	0	0	0.02	0.435	Malignant cells	PR vs. SD
TMEM14A	-0.869042	2.08786e-180	7.03901e-176	0.401	0.611	Malignant cells	PR vs. SD
CP	-0.871021	0	0	0.022	0.32	Malignant cells	PR vs. SD
NSD3	-0.87134	9.57809e-271	3.22916e-266	0.417	0.685	Malignant cells	PR vs. SD
ANXA3	-0.882463	5.46065e-223	1.841e-218	0.159	0.456	Malignant cells	PR vs. SD
RDH10	-0.883134	0	0	0.09	0.432	Malignant cells	PR vs. SD
ALDOA	-0.892933	0	0	0.311	0.732	Malignant cells	PR vs. SD
CCL20	-0.895237	3.32811e-146	1.12204e-141	0.096	0.31	Malignant cells	PR vs. SD
CEBPD	-0.895723	2.09263e-268	7.0551e-264	0.565	0.795	Malignant cells	PR vs. SD
PRNP	-0.896153	2.56728e-305	8.65531e-301	0.214	0.559	Malignant cells	PR vs. SD
HNRNPL	-0.897182	0	0	0.327	0.719	Malignant cells	PR vs. SD
GPI	-0.921048	1.06141e-268	3.57843e-264	0.563	0.758	Malignant cells	PR vs. SD
AC245041.2	-0.922463	0	0	0.052	0.359	Malignant cells	PR vs. SD
TAGLN2	-0.923082	0	0	0.734	0.877	Malignant cells	PR vs. SD
BEX3	-0.925539	4.97841e-132	1.67842e-127	0.634	0.687	Malignant cells	PR vs. SD
CLDN1	-0.929525	0	0	0.207	0.618	Malignant cells	PR vs. SD
RARRES1	-0.933755	6.83798e-232	2.30536e-227	0.039	0.27	Malignant cells	PR vs. SD
ALYREF	-0.942848	0	0	0.222	0.648	Malignant cells	PR vs. SD
LSR	-0.953258	3.0134e-165	1.01594e-160	0.504	0.675	Malignant cells	PR vs. SD
PLSCR1	-0.958544	0	0	0.227	0.613	Malignant cells	PR vs. SD
CAPS	-0.971594	2.63155e-86	8.87201e-82	0.157	0.349	Malignant cells	PR vs. SD
TMEM30A	-0.986369	5.16888e-225	1.74264e-220	0.28	0.552	Malignant cells	PR vs. SD
SLPI	-0.991928	4.27066e-10	1.43981e-05	0.481	0.337	Malignant cells	PR vs. SD
RHCG	-1.00495	0	0	0.01	0.27	Malignant cells	PR vs. SD
CAPNS1	-1.00578	0	0	0.509	0.767	Malignant cells	PR vs. SD
TYMP	-1.0111	3.70688e-194	1.24974e-189	0.493	0.682	Malignant cells	PR vs. SD
CITED4	-1.01424	0	0	0.172	0.535	Malignant cells	PR vs. SD
SCPEP1	-1.01612	0	0	0.22	0.578	Malignant cells	PR vs. SD
ACKR3	-1.02102	0	0	0.029	0.431	Malignant cells	PR vs. SD
CSTA	-1.0213	0	0	0.132	0.617	Malignant cells	PR vs. SD
SMCHD1	-1.03409	0	0	0.24	0.625	Malignant cells	PR vs. SD
PTHLH	-1.04782	0	0	0.025	0.414	Malignant cells	PR vs. SD
KRT19	-1.05911	0	0	0.765	0.919	Malignant cells	PR vs. SD
SGK1	-1.05968	0	0	0.156	0.612	Malignant cells	PR vs. SD
ACTG1	-1.09714	0	0	0.935	0.968	Malignant cells	PR vs. SD
JUP	-1.099	3.63687e-302	1.22614e-297	0.489	0.738	Malignant cells	PR vs. SD
SAT1	-1.10459	0	0	0.681	0.913	Malignant cells	PR vs. SD
BST2	-1.12912	2.66746e-229	8.99307e-225	0.173	0.484	Malignant cells	PR vs. SD
TNFSF10	-1.12989	0	0	0.165	0.566	Malignant cells	PR vs. SD
SPRR2A	-1.13153	2.74003e-34	9.23774e-30	0.257	0.115	Malignant cells	PR vs. SD
MARCKS	-1.13203	0	0	0.358	0.688	Malignant cells	PR vs. SD
FXYD3	-1.14147	0	0	0.8	0.88	Malignant cells	PR vs. SD
DST	-1.16291	2.16931e-69	7.31361e-65	0.466	0.538	Malignant cells	PR vs. SD
SOX2	-1.16945	0	0	0.103	0.589	Malignant cells	PR vs. SD
CXCL1	-1.19798	2.67405e-91	9.01529e-87	0.162	0.337	Malignant cells	PR vs. SD
IGFBP3	-1.21785	1.08402e-222	3.65467e-218	0.079	0.345	Malignant cells	PR vs. SD
KRT15	-1.21806	0	0	0.185	0.634	Malignant cells	PR vs. SD
TCIM	-1.22932	0	0	0.091	0.491	Malignant cells	PR vs. SD
GPNMB	-1.22976	0	0	0.135	0.565	Malignant cells	PR vs. SD
AL138963.4	-1.23131	0	0	0.103	0.595	Malignant cells	PR vs. SD
DAPL1	-1.27298	0	0	0.097	0.538	Malignant cells	PR vs. SD
GABRP	-1.29913	0	0	0.003	0.381	Malignant cells	PR vs. SD
PERP	-1.31946	0	0	0.765	0.836	Malignant cells	PR vs. SD
CTSB	-1.3251	0	0	0.318	0.702	Malignant cells	PR vs. SD
MYL12B	-1.37642	0	0	0.853	0.912	Malignant cells	PR vs. SD
MYL12A	-1.40098	0	0	0.723	0.873	Malignant cells	PR vs. SD
CD9	-1.40991	0	0	0.745	0.847	Malignant cells	PR vs. SD
MT-ND4L	-1.49568	3.91189e-291	1.31885e-286	0.44	0.705	Malignant cells	PR vs. SD
KRT13	-1.58442	0	0	0.067	0.617	Malignant cells	PR vs. SD
KRT5	-1.63026	0	0	0.076	0.646	Malignant cells	PR vs. SD
S100A11	-1.63098	0	0	0.465	0.97	Malignant cells	PR vs. SD
IFITM3	-1.65779	0	0	0.62	0.857	Malignant cells	PR vs. SD
IFI27	-1.66406	0	0	0.303	0.885	Malignant cells	PR vs. SD
LCN2	-1.67531	2.60513e-276	8.78295e-272	0.116	0.457	Malignant cells	PR vs. SD
IFITM1	-1.68334	0	0	0.155	0.737	Malignant cells	PR vs. SD
KRT6A	-2.00696	0	0	0.093	0.664	Malignant cells	PR vs. SD
LY6D	-2.18061	0	0	0.044	0.469	Malignant cells	PR vs. SD
MTRNR2L12	-2.19954	0	0	0.258	0.786	Malignant cells	PR vs. SD
KRT17	-2.62538	0	0	0.226	0.776	Malignant cells	PR vs. SD
