# Supplementary material for: Unveiling the influence of tumor and immune signatures on immune checkpoint therapy in advanced lung cancer
Source: eLife. 2024 Nov 8;13:RP98366. doi: 10.7554/eLife.98366 (PMC11548875; doi:10.7554/eLife.98366)
Supplement: Supplementary file 4. [file elife-98366-supp4.xlsx]

## Sheet: PC signature
Table S4. Details of GO terms significantly enriched in comparisons for ICI response groups and PCs.
GO term	pval	padj	ES	NES	leadingEdge	group
CILIUM MOVEMENT	0.0001	0.0136871	-0.892055	-1.37553	CFAP43 DNAH9 ROPN1L DNAAF1 DNAI2 HYDIN CFAP73 TEKT1 CFAP53 RSPH4A DRC1 DNAI1 CCDC39 NME5 RSPH9 DNAH5 DNAH3 SPAG17 CFAP206 CCDC114 ARMC4 CFAP100 ZBBX CCDC65 CFAP221 CFAP46 WDR63 WDR78 TEKT2 PIH1D3 DNAH7 MAATS1 SPA17 DNAAF4 RFX3 CFAP61 DNAH11 TEKT4 LRRC6 CFAP54	PC1.neg
MICROTUBULE BASED MOVEMENT	9.999e-05	0.0136871	-0.871649	-1.35656	DNAH12 CFAP43 DNAH9 ROPN1L DNAAF1 DYNLRB2 DNAI2 HYDIN CFAP73 TEKT1 CFAP53 RSPH4A DRC1 DNAI1 CCDC39 NME5 MAP1A RSPH9 DNAH10 DNAH5 DNAH3 SPAG17 CFAP206 CCDC114 ARMC4 CFAP100 ZBBX CCDC65 CFAP221 CFAP46 WDR63 WDR78 TEKT2 PIH1D3 DNAH6 DYNC2H1 DNAH7 DNAH2 KIF19 MAATS1 SPA17 DNAAF4 RFX3 CFAP61 DNAH11 TEKT4 LRRC6 CFAP54 TCTEX1D2 IFT172 TRAF3IP1	PC1.neg
CILIUM ORGANIZATION	9.999e-05	0.0136871	-0.868474	-1.35406	RSPH1 CFAP157 CFAP43 DNAAF1 DYNLRB2 ZMYND10 DNAI2 HYDIN CFAP73 TEKT1 CFAP53 RSPH4A RP1 DRC1 TMEM231 DNAI1 CCDC39 NME5 CCDC113 RSPH9 DNAH5 SPAG17 DNAAF3 CFAP206 CFAP126 CCDC114 ARMC4 CFAP100 CCDC65 CFAP221 DZIP1L CFAP46 CEP126 WDR63 TEKT2 PIH1D3 MNS1 UBXN10 MAPK15 DYNC2H1 DNAH7 KIF19 BBOF1 IQCG CFAP44 DNAJB13 TUBA1A DNAAF4 CATIP RFX3 CFAP61 IQUB TEKT4 LRRC6 CFAP54 TCTEX1D2 IFT172 FOXJ1 B9D1 TRAF3I…	PC1.neg
AXONEME ASSEMBLY	0.00010003	0.0136871	-0.881546	-1.35371	RSPH1 CFAP157 CFAP43 DNAAF1 ZMYND10 DNAI2 HYDIN CFAP73 RSPH4A RP1 DRC1 DNAI1 CCDC39 RSPH9 DNAH5 SPAG17 DNAAF3 CFAP206 CCDC114 ARMC4 CFAP100 CCDC65 CFAP46 WDR63 TEKT2 PIH1D3 DNAH7 IQCG CFAP44 DNAJB13 DNAAF4 LRRC6 CFAP74	PC1.neg
MICROTUBULE BASED PROCESS	9.999e-05	0.0136871	-0.859598	-1.34992	DNAH12 RSPH1 CFAP157 CCDC78 CFAP43 DNAH9 ROPN1L DNAAF1 SAXO2 DYNLRB2 ZMYND10 DNAI2 HYDIN CFAP73 TEKT1 CFAP53 TPPP3 RSPH4A RP1 DRC1 DNAI1 CCDC39 NME5 MAP6 TUBA4B MAP1A RSPH9 DNAH10 DNAH5 DNAH3 SPAG17 DNAAF3 STMND1 CFAP206 CCDC114 ARMC4 CFAP100 ZBBX CCDC65 CFAP221 CFAP46 CEP126 WDR63 WDR78 TEKT2 PIH1D3 DNAH6 MAPK15 DYNC2H1 DNAH7 SPEF1 DNAH2 KIF19 CCDC187 MAATS1 SPA17 IQCG CFAP44 DNAJB13 TUBA1A DNAA…	PC1.neg
RESPONSE TO TYPE I INTERFERON	0.000101051	0.00526654	-0.733695	-1.71112	IFI27 IFITM1 BST2 IFI6 IFITM3 MX1 ISG15 XAF1 OAS1 IFIT3 RSAD2 OASL IFIT1 GBP2 ISG20 IRF1 IFIT2 IFITM2 HLA-G	PC2.neg
DEFENSE RESPONSE TO VIRUS	0.00010008	0.00526654	-0.679913	-1.67884	IFI27 IFITM1 BST2 IFI6 IFITM3 FLNA MX1 ISG15 IFI44L BIRC3 OAS1 DDIT4 IFIT3 RSAD2 AIM2 OASL GBP3 IFIT1 GBP1 APOBEC3A ISG20 IRF1 SPON2 IFIT2 IFITM2 PTPRC	PC2.neg
INTRACELLULAR STEROID HORMONE RECEPTOR SIGNALING PATHWAY	0.0013941	0.0263889	-0.79357	-1.65464	PMEPA1 LBH PLPP1 LMO3 FHL2 TP63 DAB2	PC2.neg
EPIDERMAL GROWTH FACTOR RECEPTOR SIGNALING PATHWAY	0.00156364	0.0280797	-0.74578	-1.62597	IFI6 AREG CEACAM1 PLAUR EREG FAM83A HBEGF EGFR	PC2.neg
KERATINOCYTE PROLIFERATION	0.0021891	0.0330373	-0.734307	-1.60096	ZFP36L1 SFN AREG CD109 EFNB2 EREG TP63	PC2.neg
SKIN DEVELOPMENT	9.999e-05	0.00526654	-0.62031	-1.60035	DSG2 ZFP36L1 MET KRT19 SFN CLDN1 KRT7 SPRR1B PLAAT4 CD109 EREG CLDN4 SCEL PDGFA PERP PALLD SPRR3 KRT17 DSC2 KRT6A KRT15 ITGA2 KRT80 EGFR IVL DSG3 KRT13 ITGA6 FOXQ1 PKP1 TP63 COL1A1 TXNIP CTSL KRT5 AQP3 GJB3 SPRR2D SPRR1A CSTA SERPINB13 DSC3 KRT16 SPINK5	PC2.neg
ENTRY INTO HOST	0.0001002	0.00526654	-0.649518	-1.58446	IFITM1 MET CTSB IFITM3 CLDN1 HSPA1B EFNB2 ICAM1 ITGB6 CD55 KRT6A ITGA2 GSN EGFR TMPRSS2 LGALS1	PC2.neg
EPIDERMIS DEVELOPMENT	9.999e-05	0.00526654	-0.60902	-1.57614	LAMB3 EMP1 DSG2 ZFP36L1 KRT19 SFN COL17A1 KRT7 LAMC2 SPRR1B PLAAT4 CD109 EREG SCEL PDGFA PERP PALLD SPRR3 KRT17 CST6 DSC2 KRT6A KRT15 SULT2B1 KRT80 EGFR IVL DSG3 KRT13 FOXQ1 PKP1 TP63 PTHLH TXNIP CTSL KRT5 AQP3 SPRR2D SPRR1A CSTA SERPINB13 CRABP2 DSC3 KRT16 SPINK5 COL7A1	PC2.neg
POSITIVE REGULATION OF ENDOTHELIAL CELL MIGRATION	0.00100604	0.0212226	-0.660114	-1.56574	MET SRPX2 PTGS2 ANXA3 RHOB PLK2 HMOX1 ETS1 GPI GATA3 NRP2 VEGFA EDN1 FGFBP1 THBS1 TMSB4X	PC2.neg
POSITIVE REGULATION OF I KAPPAB KINASE NF KAPPAB SIGNALING	0.0001002	0.00526654	-0.641072	-1.56386	BST2 TNFSF10 FLNA TGM2 CX3CL1 BIRC3 GJA1 PELI1 PLK2 HMOX1 LGALS1 SECTM1 ECM1 SLC20A1 RIPK2 IL1RN IL37 WLS S100A4 FYN	PC2.neg
VIRAL LIFE CYCLE	0.00010002	0.00526654	-0.612859	-1.54113	IFI27 IFITM1 CTSB BST2 IFITM3 MX1 CLDN1 HSPA1B EFNB2 ISG15 ICAM1 ITGB6 CD55 RESF1 OAS1 ITGA2 GSN EGFR RSAD2 TMPRSS2 LGALS1 OASL IFIT1 APOBEC3A ISG20 CCL5 GAS6 CCL2 IFITM2 TOP2A KPNA2 ITGA5 HSPA1A TRIM31	PC2.neg
CELLULAR RESPONSE TO EXTERNAL STIMULUS	0.00020004	0.00766459	-0.606451	-1.51611	BAG3 LCN2 MMP7 ICAM1 PTGS2 CDKN1A GJA1 DSC2 UPP1 MDM2 ITGA2 TRPM4 HMOX1 FOSL1 EGFR ITGA6 COL1A1 GABARAPL1 TMEM150C AQP3 IRF1 TNC DAPL1 TLR5 GAS6 FYN PTPRC SNAI2 CYBA FOLR1 VCAM1 CTSV INHBB NR4A2 ITGA4 P2RY1	PC2.neg
REGULATION OF PEPTIDASE ACTIVITY	9.999e-05	0.00526654	-0.57406	-1.48534	BST2 SFN IFI6 TNFSF10 CD109 PRNP PLAUR ASPH CSTB PTGS2 CLDN4 SERPINA1 BIRC3 TIMP2 PERP FN1 CST6 CCN1 MDM2 GSN TFPI2 F3 A2ML1 ANXA8 SERPINB5 TP63 PSMB9 AIM2 ANXA8L1 SPINK1 BBC3 NLRP2 VEGFA TIMP1 ECM1 EGLN3 RIPK2 XDH CSTA SERPINB13 C3 SOX2 SPINK5 COL7A1 TFPI NLRP7 THBS1 GAS6 FYN SERPINE1 SERPINB2 SERPINB9	PC2.neg
REGULATION OF CELLULAR PROTEIN LOCALIZATION	0.0005001	0.0136335	-0.592423	-1.47968	IFI27 SFN FLNA BAG3 EFNB2 PRNP PTGS2 MDM2 ABHD17C GSN TMEM98 EGFR LGALS3 TP63 BBC3 DAB2 LIF GBP1 LCP1 AGR2 RAC2 TP53INP2 GAS6 FYN APOD	PC2.neg
CELL JUNCTION ASSEMBLY	0.0008004	0.0179533	-0.597549	-1.47791	LAMB3 PLEC CD9 FLNA COL17A1 CLDN1 LAMC2 DST GJA1 FN1 ITGA2 FSCN1 ITGA6 PKP1 RHOD VEGFA KRT5 POF1B THBS1 CLDN5 APOD PHLDB2 SNAI2 EFNA5 GJB2 ITGA5 ACE	PC2.neg
REPRODUCTIVE SYSTEM DEVELOPMENT	0.0002	0.00766459	-0.569754	-1.44942	ZFP36L1 CTSB KRT19 TNFSF10 ITGB8 FLNA MGST1 ICAM1 EREG RDH10 PTGS2 GJA1 CCN1 FOSL1 EGFR PRDM1 SERPINB5 TP63 GATA3 CCND1 VEGFA LFNG LIF GJB3 CDKN1C TNC SULF1 CSF2	PC2.neg
ACTIN FILAMENT BASED PROCESS	0.00029997	0.00970232	-0.558391	-1.43386	DSG2 MET BST2 KRT19 FLNA CAPG ICAM1 ALDOA PLS3 CX3CL1 CDC42EP3 PDGFA PALLD RHOB GJA1 DSC2 GSN TRPM4 MYH14 MYADM FSCN1 RHOD PDLIM4 RHOF COTL1 CXCL1 EDN1 CDC42EP5 LCP1 POF1B VIM RAC2 TMSB4X ARHGAP26 CACNA2D1 CORO1A ID1 PDE4D PHLDB2 EFNA5 RGCC CSRP2 RHOV	PC2.neg
EXTRACELLULAR STRUCTURE ORGANIZATION	0.00029997	0.00970232	-0.553419	-1.43042	LAMB3 ITGB8 COL17A1 ERO1A LAMC2 BCL3 MMP7 ICAM1 ITGB6 TIMP2 PDGFA COL6A2 FN1 CCN1 COL6A1 ITGA2 MMP13 ETS1 SERPINB5 FSCN1 ITGA6 COL1A1 TIMP1 PLOD2 CTSL LCP1 FBLN2 MFAP2 TNC SULF1 SPINK5 COL7A1 COL4A2 CCDC80 THBS1 COL4A6 GAS6 SERPINE1 PXDN MMP10 FOXC1 TGFBI PHLDB2 MMP2 HPN MMP28 RGCC COL4A1 IL6 TNFRSF1B ITGA5	PC2.neg
ANATOMICAL STRUCTURE FORMATION INVOLVED IN MORPHOGENESIS	9.999e-05	0.00526654	-0.542099	-1.42818	LAMB3 KRT19 CD9 ITGB8 TM4SF1 GPNMB BCL3 CD109 EFNB2 SRPX2 CEACAM1 NIBAN2 EREG RDH10 PTGS2 TGM2 CXCL17 CX3CL1 ACKR3 PDGFA PERP HOPX ANXA3 RHOB GJA1 FN1 CCN1 PLK2 COL6A1 ITGA2 HMOX1 F3 BMP2 ETS1 FHL2 ITGA6 RAMP1 TP63 GATA3 NRP2 COL1A1 VEGFA LFNG ECM1 EDN1 DYSF ALDH1A3 C3 SOX2 SOX4 KLF2 SULF1 SPINK5 COL7A1 COL4A2 FGFBP1 WLS THBS1 CLDN5 SERPINE1 CTHRC1 ANGPTL4 CITED2 APOD CCL2 NRARP CXCL13 FOXC1 TGFB…	PC2.neg
CYTOKINE MEDIATED SIGNALING PATHWAY	9.999e-05	0.00526654	-0.539542	-1.42447	IFI27 IFITM1 BST2 IFI6 CEBPD IFITM3 MX1 HSPA1B IL32 LCN2 CEACAM1 ISG15 ICAM1 XAF1 EREG TXNDC17 PTGS2 CX3CL1 ACKR3 BIRC3 CDKN1A OAS1 FN1 PELI1 CXCL2 MUC1 TNFSF9 IL20RB HMOX1 F3 PTPRZ1 IFIT3 FSCN1 GATA3 RSAD2 PSMB9 AIM2 CLCF1 CCND1 CCL20 OASL VEGFA LIF TIMP1 IFIT1 GBP2 CXCL1 ECM1 GBP1 EDN1 LCP1 ISG20 IRF1 NFKBIA RIPK2 VIM IL1RN IL37 SOX2 CSF2 TNFRSF6B IL2RG IFIT2 CCL5 CXCL6 GAS6 FYN CXCL3 TMSB4X PX…	PC2.neg
CELL SUBSTRATE ADHESION	0.0009	0.0196889	-0.553164	-1.4084	LAMB3 FLNA COL17A1 ITGB6 CEACAM6 CX3CL1 FN1 CCN1 MSLN ITGA2 MUC4 MYADM BCAM ITGA6 RHOD COL1A1 LGALS1 VEGFA LYPD3 GBP1 FBLN2 AGR2 RAC2 CCDC80 THBS1 GAS6 SERPINE1 APOD CD3E CORO1A ID1 PHLDB2 EFNA5 MYO1G ITGA5 VCAM1 JAG1 ITGA4 CD96 MDK KDR FERMT3 SPOCK2	PC2.neg
REGULATION OF ANATOMICAL STRUCTURE MORPHOGENESIS	9.999e-05	0.00526654	-0.533204	-1.4035	ITGB8 FLNA GPNMB EFNB2 SRPX2 CEACAM1 ICAM1 NIBAN2 ALDOA PTGS2 CLDN4 CX3CL1 CDC42EP3 PDGFA ANXA3 RHOB GJA1 FN1 PLK2 HMOX1 F3 BMP2 MYH14 ETS1 MYADM GATA3 RHOD PSMB9 SEMA3B METRN VEGFA LFNG RHOF DAB2 LIF ECM1 GBP1 EDN1 CDC42EP5 SYT1 XDH RAC2 IL1RN CRABP2 C3 KLF2 SULF1 SPINK5 COL4A2 FGFBP1 THBS1 CLDN5 FYN SEMA6D SERPINE1 CTHRC1 ANGPTL4 CITED2 CCL2 SEMA3D NRARP CXCL13 FOXC1 CORO1A ID1 PHLDB2 SNAI2 EFN…	PC2.neg
EPITHELIUM DEVELOPMENT	9.999e-05	0.00526654	-0.525746	-1.39508	DSG2 ZFP36L1 MET CTSB KRT19 SFN FLNA CLDN1 AREG KRT7 SPRR1B PLAAT4 CD109 EFNB2 PRNP CEACAM1 ICAM1 EREG RDH10 TGM2 SCEL PDGFA PERP PALLD CDKN1A SPRR3 KRT17 RHOB GJA1 DSC2 KRT6A LBH CCN1 KRT15 SULT2B1 ITGA2 KRT80 HBEGF BMP2 EGFR PRDM1 IVL DSG3 SERPINB5 KRT13 MYADM LGALS3 FOXQ1 PKP1 TP63 GATA3 PSMB9 CCND1 TXNIP VEGFA LFNG DAB2 LIF CTSL EDN1 KRT5 AQP3 ALDH1A3 POF1B SPRR2D SPRR1A AGR2 VIM XDH CSTA SER…	PC2.neg
POSITIVE REGULATION OF LOCOMOTION	0.00019998	0.00766459	-0.526041	-1.37377	MET FLNA CLDN1 GPNMB LAMC2 SRPX2 ICAM1 PTGS2 CLDN4 CXCL14 CEACAM6 CXCL17 CX3CL1 S100A14 ACKR3 PDGFA ANXA3 RHOB FN1 CCN1 MDM2 PLK2 ITGA2 HMOX1 HBEGF F3 BMP2 EGFR ETS1 MYADM GPI LGALS3 ITGA6 GATA3 RHOD NRP2 SEMA3B COL1A1 CCL20 VEGFA DAB2 EDN1 DYSF RAC2 FGFBP1 THBS1 CCL5 GAS6 SEMA6D SERPINE1 TMSB4X SEMA3D MYLK PTPRC CXCL13 CORO1A SOD2	PC2.neg
REGULATION OF CELL DEATH	9.999e-05	0.00526654	-0.514501	-1.37154	MTRNR2L12 ZFP36L1 MET CTSB SFN IFI6 TNFSF10 FLNA TCIM GPNMB HSPA1B CTSC BAG3 BCL3 EFNB2 PRNP ICAM1 PLAUR NIBAN2 CEACAM5 GADD45B PTGS2 CEACAM6 TGM2 CX3CL1 ACKR3 BIRC3 HPGD SGK1 IGFBP3 PERP CDKN1A RHOB GJA1 PELI1 PHLDA1 CCN1 MDM2 MUC1 TNFSF9 PLK2 GSN HMOX1 FOSL1 F3 BMP2 EGFR DDIT4 PTPRZ1 IFIT3 FHL2 LGALS3 ITGA6 FOXQ1 TP63 GATA3 CLCF1 BBC3 LGALS1 TXNIP NLRP2 VEGFA DAB2 TIMP1 VSTM2L EDN1 ALDH1A3 IER3…	PC2.neg
TISSUE MORPHOGENESIS	0.00079992	0.0179533	-0.526303	-1.3608	MET FLNA AREG EFNB2 CEACAM1 RDH10 TGM2 PDGFA COL6A2 KRT17 RHOB GJA1 KRT6A CCN1 MDM2 COL6A1 ITGA2 HBEGF BMP2 EGFR SERPINB5 FOXQ1 TP63 GATA3 PSMB9 NRP2 VEGFA DAB2 LIF EDN1 ALDH1A3 GCNT3 TNC KRT16 SOX4 SULF1 COL7A1 WLS CTHRC1 MYLK NRARP FOXC1 PHLDB2 SNAI2 COL4A1 ITGA5 WNT7A FOLR1	PC2.neg
REGULATION OF BODY FLUID LEVELS	0.00209979	0.0326682	-0.522573	-1.34746	MET SFN CD9 FLNA CLDN1 CEACAM1 PLAUR CLDN4 SERPINA1 KCNN4 PDGFA GJA1 ITGA2 TFPI2 F3 ANXA8 GPI SYTL2 TP63 GATA3 CCND1 COL1A1 VEGFA EDN1 AQP3 CFTR IRF1 AGR2 XDH KRT16 TFPI THBS1 GAS6 FYN SERPINE1 SERPINB2	PC2.neg
REGULATION OF INTRACELLULAR SIGNAL TRANSDUCTION	9.999e-05	0.00526654	-0.499683	-1.32966	MET BST2 IGFBP4 TNFSF10 FLNA TCIM GPNMB HSPA1B AREG MUC20 BCL3 PRNP CEACAM1 ICAM1 PLAUR EREG GADD45B EPS8L1 PTGS2 CAMK2N1 DUSP5 TGM2 CXCL17 CX3CL1 ACKR3 BIRC3 TIMP2 PDGFA IGFBP3 RHOB GJA1 FN1 PELI1 LBH CCN1 MDM2 MUC1 PLK2 LMO3 HMOX1 HBEGF F3 BMP2 EGFR DDIT4 MYADM FHL2 TP63 GATA3 RHOD SPINK1 CCL20 BBC3 LGALS1 VEGFA RHOF LIF SECTM1 CLIC2 ECM1 GBP1 EDN1 IER3 NFKBIA SLC20A1 RIPK2 XDH RAC2 IL1RN IL37 …	PC2.neg
NEGATIVE REGULATION OF RESPONSE TO STIMULUS	9.999e-05	0.00526654	-0.498861	-1.32852	MET BST2 PMEPA1 CD9 IFI6 IGFBP4 TNFSF10 TCIM HSPA1B AREG BCL3 CD109 PRNP CEACAM1 ICAM1 PLAUR NIBAN2 SMCHD1 EREG CD55 PTGS2 CAMK2N1 DUSP5 CXCL17 CX3CL1 ACKR3 TIMP2 PDGFA IGFBP3 CDKN1A GJA1 LBH MDM2 MUC1 IL20RB PLK2 LMO3 HMOX1 HBEGF BMP2 EGFR ETS1 DDIT4 MYADM FHL2 LGALS3 ITGA6 TP63 GATA3 PSMB9 SEMA3B SPINK1 VASN LFNG DAB2 LIF CLIC2 ECM1 GBP1 EDN1 NFKBIA XDH IL1RN SOX2 SULF1 CSF2 SPINK5 TFPI ARHGAP4…	PC2.neg
REGULATION OF RESPONSE TO EXTERNAL STIMULUS	9.999e-05	0.00526654	-0.496973	-1.31585	MET CTSB CD9 HSPA1B CTSC MUC20 MUC16 CD109 EFNB2 CEACAM1 PLAUR MUC21 EREG CD55 PTGS2 CXCL14 TGM2 CXCL17 CX3CL1 S100A14 BIRC3 PDGFA CDKN1A GJA1 PELI1 MUC1 IL20RB ITGA2 F3 MUC4 EGFR ETS1 GATA3 RSAD2 PSMB9 AIM2 SEMA3B VEGFA SFTPA2 IFIT1 CTSL EDN1 DYSF IRF1 NFKBIA RIPK2 RAC2 C3 SPINK5 TLR5 TFPI NLRP7 THBS1 CCL5 CXCL6 GAS6 FYN SEMA6D SERPINE1 TMSB4X IDO1 SERPINB2 APOD CCL2 SEMA3D SERPINB9 PTPRC CXCL13…	PC2.neg
RESPONSE TO ENDOGENOUS STIMULUS	9.999e-05	0.00526654	-0.495133	-1.31408	DSG2 ZFP36L1 CTSB PMEPA1 CD9 TNFSF10 FLNA CLDN1 FBXO32 AREG CD109 PRNP CEACAM1 ICAM1 EREG LPIN2 PTGS2 CLDN4 TIMP2 HPGD MXRA5 CDKN1A ANXA3 GJA1 LBH CCN1 MDM2 PLPP1 COL6A1 ITGA2 LMO3 TRPM4 ACAP2 FOSL1 BMP2 EGFR ETS1 DDIT4 FHL2 RAMP1 TP63 GATA3 CCND1 COL1A1 VASN TXNIP ASS1 DAB2 TIMP1 CTSL EDN1 CFTR RIPK2 VIM IL1RN CDKN1C TNC KLF2 SULF1 EIF4EBP1 COL4A2 TFPI FGFBP1 THBS1 CLDN5 CCL5 FYN TYMS SLURP2 CIT…	PC2.neg
GROWTH	0.0009999	0.0212226	-0.500421	-1.30634	ZFP36L1 BST2 SFN CD9 IGFBP4 HSPA1B AREG TMPRSS4 CEACAM1 EREG RDH10 SGK1 IGFBP3 COL6A2 CDKN1A KRT17 GJA1 FN1 COL6A1 GSN HBEGF MMP13 EGFR GATA3 MT1X NRP2 SEMA3B VEGFA CDA ECM1 EDN1 DYSF SYT1 AGR2 CRABP2 CDKN1C TNC SOX2 KLF2 COL7A1 MT1E GAS6 SEMA6D TYMS APOD DCBLD2 SEMA3D IGFBP7 FOXC1 PDE4D EFNA5 HPN CYBA MT2A GDF15 HSPA1A WNT7A ANXA6 ASPM GNG4	PC2.neg
BIOLOGICAL ADHESION	9.999e-05	0.00526654	-0.485775	-1.29793	LAMB3 DSG2 ZFP36L1 CD9 ITGB8 FLNA COL17A1 CLDN1 GPNMB IL32 LAMC2 MUC16 EFNB2 PRNP SRPX2 CEACAM1 ICAM1 ITGB6 MUC21 CEACAM5 LMO7 CD55 LY6D CLDN4 DST FXYD5 CEACAM6 TGM2 CX3CL1 ACKR3 PERP PALLD COL6A2 RHOB FN1 PELI1 DSC2 CCN1 MUC1 TNFSF9 IL20RB MSLN COL6A1 ITGA2 GSN BMP2 MUC4 EGFR ETS1 DSG3 MYADM BCAM LGALS3 ITGA6 PKP1 GATA3 RHOD NRP2 COL1A1 LGALS1 VEGFA ASS1 VSTM2L LYPD3 GBP1 DYSF FBLN2 IRF1 AGR2 RI…	PC2.neg
ORGANONITROGEN COMPOUND BIOSYNTHETIC PROCESS	0.00089991	0.0196889	-0.495435	-1.29781	ZFP36L1 MUC20 MUC16 BCL3 MGST1 MUC21 EREG LPIN2 ALDOA PTGS2 GALNT5 LPCAT1 GLS KRT17 FUT3 PHLDA1 CCN1 UPP1 ABHD17C BACE2 MUC1 PLPP1 ITGA2 HBEGF MUC4 EGFR RAMP1 ACSL5 GATA3 CMPK2 LFNG ASS1 CDA PLOD2 GCNT3 VIM GALNT8 MKNK2 SOX4 FUT6 EIF4EBP1 THBS1 CCL5 ST6GALNAC2 TMSB4X TYMS IDO1 CD3E PTPRC GSTA4 RIMKLB MUC3A NT5E IL6 SMOX CERS3 SCD UGDH PSAT1 ITM2A CHAC1 KYNU INHBB NR4A2 GALNT4 GLCE GCLM EEF1A2 LAG3	PC2.neg
DEFENSE RESPONSE	9.999e-05	0.00526654	-0.478561	-1.28447	IFI27 IFITM1 CTSB BST2 IFI6 IGFBP4 IFITM3 FLNA MX1 CLDN1 HSPA1B IL32 CTSC MUC20 MUC16 BCL3 LCN2 CEACAM1 ISG15 ICAM1 ITGB6 XAF1 IFI44L MUC21 EREG CD55 PTGS2 SERPINA1 TGM2 CXCL17 CX3CL1 KCNN4 S100A14 BIRC3 APOL1 TAP1 OAS1 ANXA3 GJA1 FN1 PELI1 CXCL2 KRT6A BACE2 MUC1 IL20RB ITGA2 PTGES GSN HMOX1 FOSL1 F3 BMP2 MUC4 EGFR ETS1 DDIT4 PRDM1 IFIT3 LGALS3 CFB GATA3 RSAD2 PSMB9 AIM2 CCL20 NLRP2 OASL ASS1 C1R…	PC2.neg
REGULATION OF CELL POPULATION PROLIFERATION	9.999e-05	0.00526654	-0.477017	-1.27589	IFITM1 ZFP36L1 BST2 SFN CD9 FLNA CLDN1 GPNMB HSPA1B AREG LAMC2 PLAAT4 CD109 EFNB2 PRNP CEACAM1 NIBAN2 S100A6 ASPH EREG CD55 PTGS2 CAMK2N1 CEACAM6 TGM2 CX3CL1 TIMP2 HPGD PDGFA SGK1 IGFBP3 CDKN1A GJA1 FN1 PELI1 KRT6A LBH CCN1 MDM2 TNFSF9 IL20RB PLPP1 SULT2B1 ITGA2 PTGES TRPM4 HMOX1 HBEGF FOSL1 F3 BMP2 EGFR ETS1 PTPRZ1 PRDM1 SERPINB5 IFIT3 LGALS3 TP63 GATA3 NRP2 CLCF1 PTHLH CCND1 TXNIP VEGFA LIF TIM…	PC2.neg
RESPONSE TO OXYGEN CONTAINING COMPOUND	0.00039996	0.0116313	-0.474861	-1.26587	DSG2 ZFP36L1 MET CD9 TNFSF10 FLNA CLDN1 FBXO32 AREG LCN2 PRNP CEACAM1 MGST1 ICAM1 EREG LPIN2 CD55 PTGS2 CLDN4 CX3CL1 S100A14 HPGD COL6A2 CDKN1A RHOB GJA1 PELI1 CXCL2 MDM2 COL6A1 ITGA2 PTGES GSN TRPM4 HMOX1 MMP13 FOSL1 EGFR ETS1 DDIT4 GATA3 SOD3 CCND1 COL1A1 LGALS1 TXNIP CMPK2 ASS1 TIMP1 CXCL1 EDN1 AQP3 CFTR GJB3 NFKBIA ANO1 RIPK2 VIM IL1RN IL37 TNC SOX4 KLF2 EIF4EBP1 CSF2 TFPI NLRP7 SPON2 THBS1 C…	PC2.neg
IMMUNE EFFECTOR PROCESS	0.00059994	0.0154072	-0.469258	-1.25093	IFI27 IFITM1 CTSB BST2 IFI6 IFITM3 FLNA MX1 TCIM HSPA1B CTSC BCL3 LCN2 CEACAM1 MGST1 ISG15 ICAM1 PLAUR IFI44L CSTB ALDOA CD55 CEACAM6 SERPINA1 BIRC3 TIMP2 LPCAT1 OAS1 ANXA3 IL20RB GSN TMEM98 TRPM4 HMOX1 DDIT4 IFIT3 GPI LGALS3 CFB PKP1 GATA3 RSAD2 AIM2 CLCF1 LGALS1 OASL LFNG RHOF C1R GBP3 COTL1 CDA IFIT1 CXCL1 GBP1 DYSF LCP1 C1S APOBEC3A ISG20 GCNT3 IRF1 RIPK2 SUSD4 RAC2 C3 SPINK5 SPON2 A1BG HSPA6…	PC2.neg
INNER DYNEIN ARM ASSEMBLY	0.0014771	0.0273993	0.737851	2.36292	DNAAF1 CCDC39 WDR63 CFAP73 ZMYND10 CFAP100 TEKT2 DNAH7 DNAAF4	PC2.pos
CILIUM MOVEMENT INVOLVED IN CELL MOTILITY	0.00295421	0.0422166	0.68917	2.20702	RSPH9 TEKT1 TEKT4 CFAP43 RSPH4A WDR63 TEKT2	PC2.pos
REGULATION OF IMMUNE RESPONSE	0.00043535	0.0453789	-0.407358	-1.7326	MUC1 MUC21 EREG HSPA1A KCNN4 ICAM1 SFTPA1 SFTPA2 LGALS3 CD55 CADM1 TREM1 CLCF1 COL1A1 SPON2 HHLA2 HLA-DQB1 C4BPA HMGB2 BIRC3 CYBA CD3D NFKBIA HLA-DRB1 IL20RB CD3E FOXJ1 AGER MYO1G HLA-DRB5 PTPRC SFTPD C2 SPNS2 LCK CD3G FCGR2A HLA-G CEACAM1 TRBC2 LIME1 IL6 HCST LAT IRF1 TNFRSF1B MUC4 MUC3A HLA-DPA1 PGC HLA-DMB LCP2 MUC5B CD48 MUC12 TRAC CD8A IGLC2 ICAM4 CD247 IGKC TRBC1 ZAP70 IGHG4 C1QA C1QB ITGA4…	PC3.neg
CORNIFICATION	0.000166472	0.0293533	0.722365	2.20219	KRT5 KRT6A KRT17 CSTA KRT13 PKP1 KRT15 DSG3 DSC3 PERP KRT6B CERS3 KRT19 KRT16 KRT23 DSG2 CASP14 KRT14 KRT6C	PC3.pos
CELL CELL JUNCTION ASSEMBLY	0.000182216	0.0293533	0.813028	2.13117	PKP1 CLDN1 GJA1 CD9 SNAI2 GJB6 CLDN5 GJB2 POF1B	PC3.pos
EPIDERMIS DEVELOPMENT	0.000149276	0.0293533	0.610725	2.11537	KRT5 KRT6A KRT17 CSTA KRT13 PKP1 KRT15 DSG3 PTHLH TP63 DSC3 PERP SERPINB13 CD109 JAG1 KRT6B CERS3 PALLD GAL FOXE1 COL7A1 KRT19 SOSTDC1 LAMC2 FABP5 KRT16 COL17A1 KRT23 EMP1 DSG2 CASP14 KRT14 IFT172 KRT6C CNFN LAMB3 SFN SPRR2A IGFBP5 FOXQ1 SPRR1A EGFR	PC3.pos
CELL JUNCTION ASSEMBLY	0.000167757	0.0293533	0.647691	1.95884	KRT5 PKP1 CLDN1 GJA1 CD9 SNAI2 DST GJB6 ITGA6 CLDN5 GJB2 POF1B APOD LAMC2 COL17A1 ITGA2 ITGA5 KRT14 FSCN1 LAMB3 PHLDB2	PC3.pos
EPITHELIUM DEVELOPMENT	0.000131648	0.0293533	0.482439	1.82198	KRT5 KRT6A KRT17 CSTA KRT13 PKP1 KRT15 CLDN1 DSG3 GJA1 TP63 DSC3 PERP PRNP SERPINB5 SERPINB13 SNAI2 CD109 JAG1 NRARP DAB2 SULF1 KRT6B GATA3 CLDN5 POF1B CERS3 PALLD CTSB GAL CALB1 SERPINE1 FOXE1 BMP2 KRT19 RHCG SOSTDC1 BMP7 RDH10 UPK1B KRT16 HEY1 COL4A1 KRT23 ITGA2 DSG2 LBH CASP14 NRG1 ADM ITGA5 KRT14 GSTA1 IFT172 KRT6C AKR1C1 CNFN CTHRC1 DACT2 CXCL10 SFN SPRR2A IGFBP5 PHLDB2 FOXQ1 SPRR1A EGFR	PC3.pos
T CELL RECEPTOR SIGNALING PATHWAY	0.000124719	0.0100456	-0.720041	-1.93299	CD3E PTPRC CD3D CD3G LCK LCP2 LAT TRAC PSMB9 PDE4D CD247 ZAP70 CTLA4 FYN WAS TRBC1 FYB1 GBP1 LIME1 THEMIS TESPA1 TRAT1 HLA-DQA2 CD28 HLA-DPA1 CCR7 HLA-DQA1 HLA-DRB1	PC4.neg
FC RECEPTOR SIGNALING PATHWAY	0.000254647	0.0173552	-0.705828	-1.86131	PTPRC CD3G LCP2 LAT PSMB9 CD247 FYN WAS NR4A3 CLEC4E MYO1G	PC4.neg
ADAPTIVE IMMUNE RESPONSE	0.000103381	0.00984609	-0.584258	-1.82736	CD3E PTPRC FGL1 CD3D CD3G TRBC2 TNFRSF1B FGA CD8A CD7 FGB LAT TRAC PRF1 SIT1 CD27 SAMSN1 CD48 CD247 SPN ZAP70 CD8B LAG3 CTLA4 FYN CD6 ARG2 TAP1 WAS SH2D1A SASH3 KLRK1 TRBC1 TNFAIP3 C1S IFNG IRF1 LIME1 PDCD1 THEMIS CAMK4 TRAT1 HLA-DQA2 IRF4 MYO1G CD28 C3 PRDM1 HLA-DMB CTSL CD84 C2 ZNF683 LEF1 GPR183 C1R HLA-DPA1 CD70 CXCL13 GZMM HLA-DQA1 HLA-DRB1 LTA IL7R IL18BP	PC4.neg
ALPHA AMINO ACID METABOLIC PROCESS	0.00067714	0.0327124	-0.720064	-1.77176	CPS1 KYNU NOS1 SLC7A11 ARG2 NR1H4 HGD HAL GCLM CTH ODC1 ASS1 SDS ACMSD	PC4.neg
SECONDARY METABOLIC PROCESS	0.000581058	0.0302834	-0.798835	-1.7691	AKR1C2 AKR1C3 AKR1B10 SQOR SLC7A11 AKR1C1 ABCC2 CTH	PC4.neg
LYMPHOCYTE ACTIVATION	0.000104932	0.00984609	-0.571573	-1.76798	CD3E PTPRC CD2 FGL1 CD3D CD3G TRBC2 TNFRSF1B LCK ITM2A CD8A CD7 LAT TBC1D10C LCP1 RHOH CCL5 CORO1A PRF1 RASAL3 SIT1 RAC2 CD27 SAMSN1 IKZF1 SPN ZAP70 TIGIT CD8B LAG3 ITGA4 CTLA4 SIRPG FYN CD6 ARG2 WAS SASH3 VNN1 KLRK1 TRBC1 TNFAIP3 ICOS IFNG IRF1 CD5 PDCD1 THEMIS IL21R CAMK4 CLEC4E CD38 TESPA1 IRF4 CD28 SFRP1 PRDM1 RIPOR2 HLA-DMB ZNF683 LEF1 GPR183 HLA-DPA1 CCR7 CD70	PC4.neg
T CELL ACTIVATION	0.000109027	0.00984609	-0.570888	-1.71737	CD3E PTPRC CD2 FGL1 CD3D CD3G TNFRSF1B LCK CD8A CD7 LAT LCP1 RHOH CCL5 CORO1A RASAL3 SIT1 RAC2 CD27 SPN ZAP70 TIGIT CD8B LAG3 CTLA4 SIRPG FYN CD6 ARG2 WAS SASH3 VNN1 KLRK1 ICOS IFNG IRF1 CD5 PDCD1 THEMIS CAMK4 CLEC4E TESPA1 IRF4 CD28 PRDM1 RIPOR2 HLA-DMB ZNF683 LEF1 GPR183 HLA-DPA1 CCR7 CD70 VCAM1 IL7R TNFRSF4 TNFRSF18 NRARP TNFSF13B TMIGD2 BTLA TNFSF8 FOXP3 IL2RA IDO1	PC4.neg
LEUKOCYTE CELL CELL ADHESION	0.000111235	0.00984609	-0.573675	-1.70183	CD3E PTPRC S100A9 FGL1 LCK RHOH CCL5 CORO1A RASAL3 RAC2 CD27 SPN ZAP70 TIGIT LAG3 ITGA4 CTLA4 SIRPG FYN CD6 ARG2 SASH3 VNN1 KLRK1 ICOS IFNG IRF1 SELPLG FERMT3 CD5 PDCD1 NR4A3 ETS1 TESPA1 PECAM1 CD28 RIPOR2 SELL S100A8 HLA-DMB ASS1 HLA-DPA1 CCR7 CD70 VCAM1 IL7R TNF NRARP TNFSF13B TMIGD2 BTLA FOXP3 IL2RA IDO1	PC4.neg
REGULATION OF IMMUNE SYSTEM PROCESS	0.000100806	0.00984609	-0.519593	-1.65928	CD3E PTPRC CYBA CD2 S100A9 FGL1 CD3D CD3G TRBC2 TNFRSF1B FGA LCK LCP2 HCST SLC7A2 CD8A FGB MUC5B LAT SLC7A11 TBC1D10C TRAC RHOH CCL5 CST7 PSMB9 PDE4D CORO1A CD96 RASAL3 SIT1 RAC2 CD27 SAMSN1 CD48 CD247 SPN ZAP70 TIGIT CD8B LAG3 ITGA4 CTLA4 SIRPG FYN FOXC1 CD6 ARG2 WAS SH2D1A NR1H4 SASH3 VNN1 KLRK1 TRBC1 TNFAIP3 C1S ICOS IFNG IRF1 MUC13 FYB1 GBP1 CXCR3 SERPINB9 LIME1 CD5 PDCD1 CCL4 NR4A3 KLRD1 THE…	PC4.neg
DEFENSE RESPONSE	0.000100796	0.00984609	-0.479394	-1.5315	PTPRC CYBA KYNU S100A9 GBP2 TRBC2 TNFRSF1B LSP1 FGA SPP1 SLC7A2 CXCR4 OAS1 FGB MUC5B LAT GZMB CCL5 CST7 DEFB1 APOL1 PSMB9 CORO1A PRF1 CD96 CD48 SPN LAG3 FYN CD6 GBP4 ARG2 TAP1 WAS SH2D1A NR1H4 VNN1 KLRK1 TRBC1 TNFAIP3 C1S IFNG IRF1 MUC13 GBP1 CXCR3 VIM SERPINB9 GNLY COTL1 APOL2 CCL4 KLRD1 ETS1 ISG20 LRRK2 CAMK4 GBP5 CLEC4E TRAT1 HLA-DQA2 IRF4 MUC5AC CD28 C3 CXCR6 TNIP3 PRDM1 IL32 XAF1 S100A8 SLPI…	PC4.neg
RESPONSE TO CYTOKINE	0.000204186	0.0150757	-0.474347	-1.49881	AKAP12 PTPRC CYBA KYNU IL2RG SOD2 GBP2 TNFRSF1B CXCR4 OAS1 FGB LCP1 CCL5 PSMB9 CORO1A LAPTM5 CD27 PTPN7 IL2RB ITGA4 FYN FOXC1 GBP4 WAS NR1H4 ABCC2 TNFAIP3 IFNG IRF1 KLF2 GBP1 SPOCK2 CXCR3 VIM SELPLG IL16 CCL4 ETS1 IL21R GCLM ISG20 GBP5 CD38 HLA-DQA2 IRF4 CTH LTB PCK1 SFRP1 CXCR6 RIPOR2 IL32 XAF1 TFPI TRIM31 GBP3 ASS1 LEF1 CCL3L1 OASL HLA-DPA1 CCR7 TNFRSF9 CD70 CCL3 CXCL13 S1PR1 GBP7 HLA-DQA1 HLA-…	PC4.neg
SMALL MOLECULE METABOLIC PROCESS	0.000517224	0.0288622	-0.473856	-1.48102	CPS1 AKR1C2 GLRX RIMKLB AKR1C3 KYNU NNMT TXNRD1 NOS1 AKR1B10 CEMIP PDE10A OAS1 SLC7A11 APOL1 PSMB9 PDE4D PTGR1 GLCE AKR1C1 NPY1R ARG2 ALOX5AP NR1H4 VNN1 ABCC2 HGD HAL UGDH IFNG SPOCK2 GIMAP7 SLC6A8 CYP4F3 APOL2 NR4A3 GCLM CYP3A5 LRRK2 ECI2 MT-ATP6 GDA RBP4 CTH OLAH PCK1 C3 AFP PCSK9 ODC1 CYP24A1 CYP2C9 ASS1 NQO1 AMN ADH6 MT-CO2 RDH12 UPP1	PC4.neg
LYMPHOCYTE ACTIVATION	0.000215054	0.00710901	-0.744951	-2.34578	CD3E PTPRC CD3D CD2 CORO1A RAC2 CD3G LCP1 TRBC2 LCK CD7 LAT ITM2A CCL5 CD8A TBC1D10C FYN IKZF1 RHOH CD8B SIT1 CD27 PRF1 RASAL3 ZAP70 SPN CD74 ITGA4 WAS SAMSN1 LAG3 TIGIT CD6 SIRPG SASH3 CTLA4 TRBC1 KLRK1 HLA-DPA1 TNFAIP3 ICOS CD5 IFNG THEMIS PDCD1 IL21R CAMK4 TESPA1 TNFRSF1B IRF4 CD28 GPR183 CD38 ZNF683 CCR7 GATA3 LEF1 LGALS1 ID2 IL7R CD70 TNFRSF18 IGFBP2 TNFRSF4 PRDM1 RIPOR2 VCAM1 CD79B TYROBP L…	PC5.neg
T CELL ACTIVATION	0.000212044	0.00710901	-0.747339	-2.24878	CD3E PTPRC CD3D CD2 CORO1A RAC2 CD3G LCP1 LCK CD7 LAT CCL5 CD8A FYN RHOH CD8B SIT1 CD27 RASAL3 ZAP70 SPN CD74 WAS LAG3 TIGIT CD6 SIRPG SASH3 CTLA4 KLRK1 HLA-DPA1 ICOS CD5 IFNG THEMIS PDCD1 CAMK4 TESPA1 TNFRSF1B IRF4 CD28 GPR183 ZNF683 CCR7 GATA3 LEF1 LGALS1 IL7R CD70 TNFRSF18 IGFBP2 TNFRSF4 PRDM1 RIPOR2 VCAM1 FCER1G TNFSF8 IL1B ZFP36L1 TMIGD2 LFNG PELI1 TNFSF9 FOXP3 IL2RA BTLA XCL1 CD83	PC5.neg
T CELL RECEPTOR SIGNALING PATHWAY	0.000205255	0.00710901	-0.840059	-2.18241	CD3E PTPRC CD3D CD3G LCK LCP2 LAT FYB1 FYN TRAC CD247 ZAP70 WAS CTLA4 HLA-DRB1 TRBC1 LIME1 HLA-DPA1 HLA-DRB5 HLA-DQB1 THEMIS TESPA1 TRAT1 HLA-DQA1 CD28 HLA-DQA2 CCR7 GATA3	PC5.neg
POSITIVE REGULATION OF LEUKOCYTE CELL CELL ADHESION	0.000207641	0.00710901	-0.787234	-2.16768	CD3E PTPRC CORO1A LCK CCL5 FYN RHOH CD27 RASAL3 ZAP70 CD74 ITGA4 CD6 SIRPG SASH3 CTLA4 ETS1 KLRK1 HLA-DPA1 ICOS CD5 IFNG PDCD1 TESPA1 CD28 CCR7 GATA3 TNF LGALS1 IL7R CD70 IGFBP2 VCAM1 IL1B TMIGD2 TNFSF9 FOXP3 IL2RA BTLA XCL1 CD83	PC5.neg
ANTIGEN RECEPTOR MEDIATED SIGNALING PATHWAY	0.000207555	0.00710901	-0.75992	-2.1401	CD3E PTPRC CD3D CD3G TRBC2 LCK LCP2 LAT FYB1 FYN TRAC CD247 ZAP70 WAS CTLA4 HLA-DRB1 TRBC1 LIME1 HLA-DPA1 HLA-DRB5 HLA-DQB1 THEMIS TESPA1 TRAT1 HLA-DQA1 CD28 HLA-DQA2 CD38 CCR7 GATA3	PC5.neg
ADAPTIVE IMMUNE RESPONSE	0.000218531	0.00710901	-0.627994	-2.01319	CD3E PTPRC CD3D CD3G TRBC2 CD7 LAT CD8A FYN TRAC CD48 CD8B SIT1 CD247 CD27 PRF1 ZAP70 SPN CD74 WAS SAMSN1 LAG3 CD6 SASH3 CTLA4 SH2D1A HLA-DRB1 TRBC1 KLRK1 LIME1 HLA-DPA1 TNFAIP3 HLA-DRB5 IFNG HLA-DQB1 MYO1G THEMIS PDCD1 CAMK4 TNFRSF1B TRAT1 HLA-DQA1 IRF4 CD28 HLA-DQA2 GZMM GPR183 CXCL13 CD84 ZNF683 GATA3 TNF LEF1 IL7R CD70 LTA PRDM1 CD79B LAT2 FCER1G TRBV9 CTSC AZGP1 IL1B FOXP3 CD79A C1QC BTLA HL…	PC5.neg
LYMPHOCYTE MIGRATION	0.000206526	0.00710901	-0.783139	-1.99888	CCL5 ZAP70 SPN ITGA4 CXCR3 KLRK1 CCL4 MYO1G CCL3 GPR183 CCL3L1 CXCL13 CCR7 GATA3 S1PR1 XCL2 RIPOR2	PC5.neg
REGULATION OF IMMUNE SYSTEM PROCESS	0.000228676	0.00710901	-0.586902	-1.9732	CD3E PTPRC CD3D CD2 CORO1A RAC2 CD3G TRBC2 HCST LCK LCP2 LAT CCL5 CST7 CD8A TBC1D10C FYB1 FYN TRAC RHOH CD48 CD8B SIT1 CD247 CD27 RASAL3 ZAP70 CD96 SPN CD74 ITGA4 WAS SAMSN1 LAG3 TIGIT CD6 SIRPG SASH3 CTLA4 SH2D1A ETS1 HLA-DRB1 CXCR3 TRBC1 KLRK1 LIME1 HLA-DPA1 TNFAIP3 CCL4 ICOS HLA-DRB5 CD5 IFNG HLA-DQB1 MYO1G THEMIS PDCD1 CAMK4 SELL KLRD1 TESPA1 TNFRSF1B TRAT1 IFITM1 HLA-DQA1 IRF4 CD28 CCL3 HLA-…	PC5.neg
LEUKOCYTE MIGRATION	0.0002145	0.00710901	-0.581121	-1.80851	CD2 CORO1A RAC2 LCK CXCR4 CCL5 FYN CD48 ZAP70 SPN CD74 ITGA4 GYPC SIRPG DOK2 CXCR3 KLRK1 SELPLG CCL4 IL16 MYO1G SELL CCL3 GPR183 CCL3L1 CXCL13 CD84 CCR7 GATA3 TNF TNFRSF18 S1PR1 XCL2 RIPOR2 VCAM1 CXCL8 PECAM1 FCER1G IL1B XCL1 IL1RN FUT7 IGKC CCR6 VPREB3 FN1 CEACAM1 CXCL1 JCHAIN IGKV4-1 IGHM APOD	PC5.neg
CYTOKINE MEDIATED SIGNALING PATHWAY	0.000217628	0.00710901	-0.539834	-1.71307	PTPRC IL2RG LCP1 CXCR4 CCL5 FYN CD27 CD74 IL2RB TMSB4X HLA-DRB1 CXCR3 HLA-DPA1 TNFAIP3 CCL4 IL16 HLA-DRB5 IFNG HLA-DQB1 VIM LTB IL21R TNFRSF1B IFITM1 HLA-DQA1 IRF4 CCL3 HLA-DQA2 CXCR6 IFITM2 CCL3L1 CXCL13 CCR7 IL32 GATA3 TNF OASL IL7R CD70 TNFRSF9 TNFRSF18 S1PR1 LTA TNFRSF4 XCL2 VCAM1 LMNB1 CXCL8 FCER1G TNFSF8 IL1B PELI1 TNFSF9 IL2RA XCL1 SPI1 NFKBIA MX1 IRF8 IGHG4 IL1RN CCR6 CD40LG RSAD2 FN1 CCR…	PC5.neg
OXIDATION REDUCTION PROCESS	0.000189934	0.00710901	0.680137	1.99988	AKR1C3 AKR1C2 PTGR1 TXNRD1 NOS1 AKR1B10 SOD2 HSD17B2 UGDH GLRX CP SRXN1 HGD AKR1C1 FTL SQOR NQO1 ASPH CYBA CYP4F3 MGST1 ECI2 CYP24A1 CYP1B1 GPX2 CYP3A5 SMOX CYP2C9 ADH6 RDH12 TXNDC17 PLOD2 MT-ND3 BMP2 EGLN3 CDK1 PAH NR1D1 GPX3 FASN ERO1A IDO1 TP53I3 ADGRF5 ALDH1A1 PRODH2	PC5.pos
SMALL MOLECULE METABOLIC PROCESS	0.000184945	0.00710901	0.629376	1.98297	CPS1 AKR1C3 NNMT RIMKLB AKR1C2 PTGR1 TXNRD1 NOS1 AKR1B10 KYNU PDE10A SLC7A11 GLCE CEMIP APOL1 UGDH GLRX HGD AKR1C1 NPY1R GCLM ABCC2 ARG2 OAS1 VNN1 NR1H4 NQO1 HAL CYP4F3 VCAN PCSK9 LRRK2 ECI2 CTH CYP24A1 APOL2 RBP4 GDA C3 ASS1 AMN CYP1B1 PCK1 SLC6A8 OLAH AFP PDE4D CYP3A5 UPP1 CYP2C9 TCN2 ODC1 ADH6 RDH12 SDS FGF19 MT-ATP6 ACMSD PLOD2 NT5E PSMB9	PC5.pos
CELLULAR HORMONE METABOLIC PROCESS	0.000192197	0.00710901	0.800582	1.91777	AKR1C3 AKR1C2 AKR1B10 HSD17B2 SPP1 AKR1C1 RBP4 CYP1B1 AFP CYP3A5 CYP2C9 ADH6 RDH12	PC5.pos
SECONDARY METABOLIC PROCESS	0.000195465	0.00710901	0.903113	1.87028	AKR1C3 AKR1C2 AKR1B10 SLC7A11 AKR1C1 SQOR ABCC2 CTH CYP1B1	PC5.pos
SULFUR COMPOUND BIOSYNTHETIC PROCESS	0.000193986	0.00710901	0.833879	1.85634	SLC7A11 GLCE UGDH GCLM VCAN MGST1 CTH	PC5.pos
ALPHA AMINO ACID METABOLIC PROCESS	0.000191718	0.00710901	0.796886	1.84508	CPS1 NOS1 KYNU SLC7A11 HGD GCLM ARG2 NR1H4 HAL CTH ASS1 ODC1 SDS ACMSD PLOD2	PC5.pos
POST TRANSLATIONAL PROTEIN MODIFICATION	0.000387072	0.010594	0.699573	1.80653	FGA IGFBP1 SPP1 APOL1 CP FBXO2 MSLN VCAN PCSK9 C3 AFP LMO7 KNG1 PSMB9 FBN1 SDC2 IL6 FGG STC2 IGFBP3 CCN1 UBD	PC5.pos
ORGANIC HYDROXY COMPOUND TRANSPORT	0.00058072	0.0140964	0.702422	1.75401	NOS1 SPP1 AKR1C1 ABCC2 NR1H4 SLC51B PCSK9 RBP4	PC5.pos
REGULATION OF AXONOGENESIS	0.00173578	0.0289411	0.753624	1.71279	SPP1 SEMA6A EFNA5 METRN NEFL VEGFA	PC5.pos
VASCULAR PROCESS IN CIRCULATORY SYSTEM	0.00174757	0.0289411	0.663332	1.70482	CPS1 AKAP12 NOS1 SOD2 FGA FGB FOXC1 GCLM FOXC2 KNG1 VEGFA EDNRB C2CD4A	PC5.pos
CELLULAR RESPONSE TO HORMONE STIMULUS	0.000765257	0.0164005	0.580063	1.65029	CPS1 AKR1C3 AKR1C2 IGFBP1 SPP1 FGB AKR1C1 GCLM ABCC2 NR1H4 TFPI CYBA EFNA5 PCSK9 CTSL ASS1 SFRP1 PCK1 NR4A1 FOXC2 MDM2 STC1 FBN1 ITGA2 MT-ND3 NR4A2 TRIB3 FHL2 CDC6 GJB2 NR1D1 CA2 EGFR DNAAF4	PC5.pos
ANION TRANSPORT	0.00193199	0.0308423	0.586934	1.6273	SLC7A2 SLC7A11 APOL1 AKR1C1 ABCC2 NR1H4 SLC51B SLCO4A1 HBA2 PITPNC1 SPX SLC6A8 ANO3 SLC20A1 HBB STC1 CA12	PC5.pos
CARBOHYDRATE DERIVATIVE METABOLIC PROCESS	0.0013346	0.0243806	0.548911	1.59321	AKR1C3 AKR1C2 AKR1B10 KYNU PDE10A GLCE CEMIP UGDH MUC1 FOXC1 AKR1C1 FBXO2 MUC5B MUC13 GALNT4 VCAN SLC51B LRRK2 BACE2 PDE4D MUC5AC UPP1 HBEGF GCNT3 MT-ATP6 NT5E SDC2 TK1 NCCRP1 BMP2	PC5.pos

## Sheet: single-cell DEG_up
Table S4. Details of GO terms significantly enriched in comparisons for ICI response groups and PCs.
GO term	pval	padj	ES	NES	leadingEdge	group
NUCLEAR TRANSCRIBED MRNA CATABOLIC PROCESS NONSENSE MEDIATED DECAY	0.00110865	0.0211089	0.864892	3.72555	RPS4Y1 RPL13A RPS17 RPL17 RPL27A RPL23A RPS2 RPL3 RPS6 RPL21 RPL4 RPL7 RPL5 RPL23 RPL6 RPL19 RPL7A RPL31 RPL10A RPS18 RPS9 RPS20 RPL14 RPSA RPL13 RPLP2 RPS7 RPS14 RPL34 RPS3A RPL15 RPL29 RPL18A RPL24 RPL27 RPL37A RPS5 RPL11 RPL12 RPL32 RPL38 RPS3 RPL9 RPL18 RPL36 RPS25 RPS23 RPL22 RPS8 RPL41 RPL26 RPS15A RPLP0 RPS19 RPS13 RPS27A RPL35A UBA52 RPS11 RPS4X RPS15 RPL35 RPS12 EIF3E RPS28 RPLP1 RPS21 R…	Responder vs. Non-responder
COTRANSLATIONAL PROTEIN TARGETING TO MEMBRANE	0.000986193	0.0199856	0.867588	3.71779	RPS4Y1 RPL13A RPS17 RPL17 RPL27A RPL23A RPS2 RPL3 RPS6 RPL21 RPL4 RPL7 RPL5 RPL23 RPL6 RPL19 RPL7A RPL31 RPL10A RPS18 RPS9 RPS20 RPL14 RPSA RPL13 RPLP2 RPS7 RPS14 RPL34 RPS3A RPL15 RPL29 RPL18A RPL24 RPL27 RPL37A RPS5 RPL11 RPL12 RPL32 RPL38 RPS3 RPL9 RPL18 RPL36 RPS25 RPS23 RPL22 RPS8 RPL41 RPL26 RPS15A RPLP0 RPS19 RPS13 RPS27A RPL35A UBA52 RPS11 RPS4X RPS15 RPL35 RPS12 RPS28 RPLP1 RPS21 RPS24 R…	Responder vs. Non-responder
TRANSLATIONAL INITIATION	0.00175131	0.0285545	0.806726	3.67967	RPS4Y1 RPL13A RPS17 RPL17 RPL27A RPL23A RPS2 RPL3 RPS6 RPL21 RPL4 RPL7 RPL5 RPL23 RPL6 RPL19 RPL7A RPL31 RPL10A RPS18 RPS9 RPS20 RPL14 RPSA RPL13 RPLP2 RPS7 RPS14 RPL34 RPS3A RPL15 RPL29 RPL18A RPL24 RPL27 RPL37A RPS5 RPL11 RPL12 RPL32 RPL38 RPS3 NPM1 RPL9 RPL18 RPL36 RPS25 RPS23 RPL22 RPS8 RPL41 RPL26 EIF3D EIF3M RPS15A RPLP0 RPS19 RPS13 RPS27A RPL35A UBA52 RPS11 RPS4X EIF3F RPS15 EIF3G RPL35 RP…	Responder vs. Non-responder
ESTABLISHMENT OF PROTEIN LOCALIZATION TO ENDOPLASMIC RETICULUM	0.00109051	0.0211089	0.82171	3.56212	RPS4Y1 RPL13A RPS17 RPL17 RPL27A RPL23A RPS2 RPL3 RPS6 RPL21 RPL4 RPL7 RPL5 RPL23 RPL6 RPL19 RPL7A RPL31 RPL10A RPS18 RPS9 RPS20 RPL14 RPSA RPL13 RPLP2 RPS7 RPS14 RPL34 RPS3A RPL15 RPL29 RPL18A RPL24 RPL27 RPL37A RPS5 RPL11 RPL12 RPL32 RPL38 RPS3 RPL9 RPL18 RPL36 RPS25 RPS23 RPL22 RPS8 RPL41 RPL26 RPS15A RPLP0 RPS19 RPS13 RPS27A RPL35A UBA52 RPS11 RPS4X RPS15 RPL35 RPS12 RPS28 RPLP1 RPS21 RPS24 R…	Responder vs. Non-responder
VIRAL GENE EXPRESSION	0.00162338	0.0272516	0.778236	3.53802	RPS4Y1 RPL13A RPS17 RPL17 RPL27A RPL23A RPS2 RPL3 RPS6 RPL21 RPL4 RPL7 RPL5 RPL23 RPL6 RPL19 RPL7A RPL31 RPL10A RPS18 RPS9 RPS20 RPL14 RPSA RPL13 RPLP2 RPS7 RPS14 RPL34 RPS3A RPL15 RPL29 RPL18A RPL24 RPL27 RPL37A RPS5 RPL11 RPL12 RPL32 RPL38 RPS3 RPL9 RPL18 RPL36 RPS25 RPS23 RPL22 RPS8 RPL41 RPL26 EIF3D RPS15A RPLP0 RPS19 RPS13 RPS27A RPL35A UBA52 RPS11 RPS4X EIF3F RPS15 EIF3G RPL35 RPS12 RPS28 R…	Responder vs. Non-responder
PROTEIN TARGETING TO MEMBRANE	0.00144718	0.0255282	0.783937	3.51245	RPS4Y1 RPL13A RPS17 RPL17 RPL27A RPL23A RPS2 RPL3 RPS6 RPL21 RPL4 RPL7 RPL5 RPL23 RPL6 RPL19 RPL7A RPL31 RPL10A RPS18 RPS9 RPS20 RPL14 RPSA RPL13 RPLP2 RPS7 RPS14 RPL34 RPS3A RPL15 RPL29 RPL18A RPL24 RPL27 RPL37A RPS5 RPL11 RPL12 RPL32 RPL38 RPS3 RPL9 RPL18 RPL36 RPS25 RPS23 RPL22 RPS8 RPL41 RPL26 RPS15A RPLP0 RPS19 RPS13 RPS27A RPL35A UBA52 RPS11 RPS4X RPS15 RPL35 RPS12 RPS28 RPLP1 RPS21 RPS24 R…	Responder vs. Non-responder
ANION HOMEOSTASIS	0.00198334	0.0308089	0.744874	1.94688	APOE SLC34A2 XBP1 GOT1 GLS	Responder vs. Non-responder
NUCLEAR TRANSCRIBED MRNA CATABOLIC PROCESS NONSENSE MEDIATED DECAY	0.00100402	0.0392263	0.853531	3.47574	RPL17 RPS4Y1 RPL23A RPL4 RPS6 RPL3 RPS17 RPL7A RPL13A RPL6 RPL18A RPS7 RPL36 RPL5 RPLP0 RPL27A RPL19 RPS2 RPS28 RPL41 RPL12 RPL7 RPL21 RPL23 RPL31 RPL34 RPS9 RPL14 RPL29 RPL10A RPSA RPS3A RPL13 RPLP2 RPL27 RPS15 RPS14 RPL38 RPS5 RPL32 RPS8 RPL15 RPL11 RPS19 RPS18 RPL35A RPL37A RPS27A UBA52 RPL24 RPS20 RPLP1 RPS3 RPS12 RPL18 RPL22 RPS13 RPS23 RPS4X RPL26 RPS25 RPL35 RPS15A RPL9	PR vs. PD
TRANSLATIONAL INITIATION	0.00149254	0.04591	0.790428	3.40424	RPL17 RPS4Y1 RPL23A RPL4 RPS6 RPL3 RPS17 RPL7A RPL13A RPL6 RPL18A RPS7 RPL36 RPL5 RPLP0 RPL27A RPL19 RPS2 RPS28 RPL41 RPL12 RPL7 RPL21 RPL23 RPL31 RPL34 RPS9 RPL14 RPL29 RPL10A RPSA RPS3A RPL13 EIF3D RPLP2 RPL27 RPS15 RPS14 RPL38 RPS5 RPL32 RPS8 NPM1 RPL15 RPL11 RPS19 RPS18 RPL35A RPL37A RPS27A UBA52 RPL24 EIF3M RPS20 EIF4EBP1 RPLP1 EIF3L RPS3 RPS12 RPL18 RPL22 EIF3G RPS13 EIF3F RPS23 EIF3K RPS4X…	PR vs. PD
COTRANSLATIONAL PROTEIN TARGETING TO MEMBRANE	0.000904159	0.0375047	0.827788	3.32599	RPL17 RPS4Y1 RPL23A RPL4 RPS6 RPL3 RPS17 RPL7A RPL13A RPL6 RPL18A RPS7 RPL36 RPL5 RPLP0 RPL27A RPL19 RPS2 RPS28 RPL41 RPL12 RPL7 RPL21 RPL23 RPL31 RPL34 RPS9 RPL14 RPL29 RPL10A RPSA RPS3A RPL13 RPLP2 RPL27 RPS15 RPS14 RPL38 RPS5 RPL32 RPS8 RPL15 RPL11 RPS19 RPS18 RPL35A RPL37A RPS27A UBA52 RPL24 RPS20 RPLP1 RPS3 RPS12 RPL18 RPL22 RPS13 RPS23 RPS4X RPL26 RPS25 RPL35 RPS15A RPL9	PR vs. PD
VIRAL GENE EXPRESSION	0.00139082	0.0434709	0.765581	3.26833	RPL17 RPS4Y1 RPL23A RPL4 RPS6 RPL3 RPS17 RPL7A RPL13A RPL6 RPL18A RPS7 RPL36 RPL5 RPLP0 RPL27A RPL19 RPS2 RPS28 RPL41 RPL12 RPL7 RPL21 RPL23 RPL31 RPL34 RPS9 RPL14 RPL29 RPL10A RPSA RPS3A RPL13 EIF3D RPLP2 RPL27 RPS15 RPS14 RPL38 RPS5 RPL32 RPS8 RPL15 RPL11 RPS19 RPS18 RPL35A RPL37A RPS27A UBA52 RPL24 RPS20 RPLP1 EIF3L RPS3 RPS12 RPL18 RPL22 EIF3G RPS13 EIF3F RPS23 RPS4X RPL26 RPS25 RPL35 RPS15A …	PR vs. PD
ESTABLISHMENT OF PROTEIN LOCALIZATION TO ENDOPLASMIC RETICULUM	0.000994036	0.0392263	0.78159	3.18778	RPL17 RPS4Y1 RPL23A RPL4 RPS6 RPL3 RPS17 RPL7A RPL13A RPL6 RPL18A RPS7 RPL36 RPL5 RPLP0 RPL27A RPL19 RPS2 RPS28 RPL41 RPL12 RPL7 RPL21 RPL23 RPL31 RPL34 RPS9 RPL14 RPL29 RPL10A RPSA RPS3A RPL13 RPLP2 RPL27 RPS15 RPS14 RPL38 RPS5 RPL32 RPS8 RPL15 RPL11 RPS19 RPS18 RPL35A RPL37A RPS27A UBA52 RPL24 RPS20 RPLP1 RPS3 RPS12 RPL18 RPL22 RPS13 RPS23 RPS4X RPL26 RPS25 RPL35 RPS15A RPL9	PR vs. PD
RIBOSOME ASSEMBLY	0.000534474	0.0293105	0.746183	2.58959	RPL23A RPL3 RPL6 RPL5 RPLP0 RPS28 RPL12 RPSA RPS15 RPS14 RPL38 RPS5 NPM1 RPL11 RPS19 RPL24 NOP53	PR vs. PD
REGULATION OF NEURONAL SYNAPTIC PLASTICITY	0.000757289	0.0336033	0.762162	2.04041	APOE KIT CAMK2B NEURL1 APP NF1 HRAS RAB11A DBN1 NPTN	PR vs. PD
COTRANSLATIONAL PROTEIN TARGETING TO MEMBRANE	0.00114548	0.0212381	0.914043	4.01537	RPL13A RPL27A RPS10 RPS17 RPS20 RPL21 RPS4Y1 RPS18 RPS2 RPS11 RPL7 RPL23 RPL24 RPL23A RPL10A RPS14 RPL3 RPLP2 RPL9 RPL15 RPL17 RPS9 RPL31 RPL13 RPS29 RPS6 RPSA RPL37A RPL14 RPS25 RPS3A RPL5 RPL11 RPL19 RPL34 RPS3 RPL18 RPS23 RPL4 RPL29 RPS5 RPL27 RPL32 RPL6 RPL26 RPS15A RPL22 RPL38 RPL7A RPS7 RPS21 RPL12 RPS13 RPL10 RPS24 RPS4X RPL18A RPL35 RPS8 RPS27A UBA52 RPL35A RPS19 RPS16 RPL36A	PR vs. SD
ESTABLISHMENT OF PROTEIN LOCALIZATION TO ENDOPLASMIC RETICULUM	0.0013369	0.0237135	0.878502	3.92783	RPL13A RPL27A RPS10 RPS17 RPS20 RPL21 RPS4Y1 RPS18 RPS2 RPS11 RPL7 RPL23 RPL24 RPL23A RPL10A RPS14 RPL3 RPLP2 RPL9 RPL15 RPL17 RPS9 RPL31 RPL13 RPS29 RPS6 RPSA RPL37A RPL14 RPS25 RPS3A RPL5 RPL11 RPL19 RPL34 RPS3 RPL18 RPS23 RPL4 RPL29 RPS5 RPL27 RPL32 RPL6 RPL26 RPS15A RPL22 RPL38 RPL7A RPS7 RPS21 RPL12 RPS13 RPL10 RPS24 RPS4X RPL18A RPL35 RPS8 RPS27A UBA52 RPL35A RPS19 RPS16 RPL36A	PR vs. SD
NUCLEAR TRANSCRIBED MRNA CATABOLIC PROCESS NONSENSE MEDIATED DECAY	0.001321	0.0236019	0.866466	3.87416	RPL13A RPL27A RPS10 RPS17 RPS20 RPL21 RPS4Y1 RPS18 RPS2 RPS11 RPL7 RPL23 RPL24 RPL23A RPL10A RPS14 RPL3 RPLP2 RPL9 RPL15 RPL17 RPS9 RPL31 RPL13 RPS29 RPS6 RPSA RPL37A RPL14 RPS25 RPS3A RPL5 RPL11 RPL19 RPL34 RPS3 RPL18 RPS23 RPL4 RPL29 RPS5 RPL27 RPL32 RPL6 RPL26 RPS15A RPL22 EIF3E RPL38 RPL7A RPS7 RPS21 RPL12 RPS13 RPL10 RPS24 RPS4X RPL18A RPL35 RPS8 RPS27A UBA52 RPL35A RPS19 RPS16 RPL36A	PR vs. SD
TRANSLATIONAL INITIATION	0.00215983	0.033336	0.785947	3.69439	RPL13A RPL27A RPS10 RPS17 RPS20 RPL21 RPS4Y1 RPS18 RPS2 RPS11 RPL7 RPL23 RPL24 RPL23A RPL10A RPS14 RPL3 RPLP2 RPL9 RPL15 RPL17 RPS9 RPL31 RPL13 RPS29 RPS6 RPSA RPL37A RPL14 RPS25 RPS3A RPL5 RPL11 RPL19 RPL34 RPS3 RPL18 RPS23 RPL4 RPL29 RPS5 RPL27 RPL32 RPL6 RPL26 RPS15A RPL22 EIF3E RPL38 NPM1 RPL7A RPS7 RPS21 RPL12 RPS13 RPL10 EIF3M RPS24 RPS4X RPL18A RPL35 RPS8 EIF3F RPS27A EIF3H UBA52 RPL35A RP…	PR vs. SD
VIRAL GENE EXPRESSION	0.00209644	0.0329472	0.767344	3.60267	RPL13A RPL27A RPS10 RPS17 RPS20 RPL21 RPS4Y1 RPS18 RPS2 RPS11 RPL7 RPL23 RPL24 RPL23A RPL10A RPS14 RPL3 RPLP2 RPL9 RPL15 RPL17 RPS9 RPL31 RPL13 RPS29 RPS6 RPSA RPL37A RPL14 RPS25 RPS3A RPL5 RPL11 RPL19 RPL34 RPS3 RPL18 RPS23 RPL4 RPL29 RPS5 RPL27 RPL32 RPL6 RPL26 RPS15A RPL22 RPL38 RPL7A RPS7 RPS21 RPL12 RPS13 RPL10 RPS24 RPS4X RPL18A RPL35 RPS8 EIF3F RPS27A UBA52 RPL35A RPS19 RPS16 EIF3G RPL36A …	PR vs. SD
RIBOSOMAL LARGE SUBUNIT ASSEMBLY	0.000497265	0.0132027	0.863828	2.76381	RPL24 RPL23A RPL3 NOP53 RPL5 RPL11 RPL6 RPL38 RPL12 RPL10 MRPL11	PR vs. SD

## Sheet: single-cell DEG_down
Table S4. Details of GO terms significantly enriched in comparisons for ICI response groups and PCs.
GO term	pval	padj	ES	NES	leadingEdge	group
POSITIVE REGULATION OF CATALYTIC ACTIVITY	0.00200904	0.0308089	-0.362218	-1.34826	S100A9 HSPA1A CYBA ATP1B1 TCIM PERP S100A10 EFNA1 PSME2 GNAS TNFSF10 PLSCR1 EGLN3 HSP90AA1 MIF LAMTOR2 CIB1 PFN2 BEX3 BCAP31 UBC CALM1 CLU CLDN3 MAP3K13 TPM1 HNRNPA2B1 FIS1 TXN PCNA APH1A SSBP1 HMGB1 PSME1 UBE2L3 CDC42 PFN1 ASPH ARF1 PRNP CD81 XRCC6 HSP90AB1 DNAJB1 PAK2 ADAM9 EGFR YWHAB CKS1B NR4A2 CLDN4 HNRNPU ERRFI1 DNAJC15 AZIN1 CXCL17 HMGB2 UBE2S SYAP1 PRKAR1A GCLM NET1 CCND3 TMSB4X IFI16 JTB…	Responder vs. Non-responder
REGULATION OF CELL DEATH	0.000500801	0.0135928	-0.368194	-1.38038	S100A9 MTRNR2L12 HSPA1A MUC1 SOD2 NDRG1 AKR1C3 NQO1 TCIM IGFBP3 IER3 LGALS3 LDHA CTSB PERP SOX2 EFNA1 YWHAZ DAD1 BTG1 FOS TNFSF10 EGLN3 CEBPB MIF SGK1 CIB1 GPNMB BEX3 HEBP2 MT-CO2 DYNLT1 HNRNPK HSPA1B ANXA5 BCAP31 UBC MCL1 CLU YWHAH TMEM14A FIS1 ENO1 ATF3 TXN APH1A HMGB1 DUSP1 TMBIM6 TNFRSF12A CDC42 LMNA MDK PRNP ADAR SEPTIN7 SQSTM1 ZFP36 CHMP4B TSPO HSP90AB1 EIF4G1 SNX6 PAK2 IER3IP1 HSPB1 UBE2V2…	Responder vs. Non-responder
CELLULAR HOMEOSTASIS	0.00184332	0.0293792	-0.400357	-1.44983	S100A9 LCN2 CP NQO1 FTL CYBA TXNRD1 ATP1B1 GLRX PHPT1 SRI ALDOA ERO1A PRDX1 ENY2 NUCKS1 NEDD8 ANXA5 BCAP31 FKBP1A CALM1 MCL1 FTH1 TMCO1 FIS1 TXN HMGB1 SLC39A4 TMBIM6 ARF1 PRNP MT1X PRDX3 TFRC MPC2 ATP1A1 UBE2S GCLM NME1 ATOX1 ANXA7 GSR ATP6V1C1 HMGN3 ATP6V0B LGALS1 MTLN SKP1 GLRX3 PDIA4 SNAPIN CALM3 UBE2K ANXA2 SOD1 BNIP3 GNB1 CHP1 PRDX4 ATP6AP1 GRINA PRDX5 PIK3CA ATP6V1G1 ATP1B3 CALM2 TRA2B BAD …	Responder vs. Non-responder
CELL MOTILITY	0.000302328	0.00969599	-0.398575	-1.47733	S100A9 S100P SOD2 IFITM1 ATP1B1 IGFBP3 LGALS3 BST2 PHPT1 EFNA1 BTG1 CD9 MIF ACTB SGK1 SMIM22 CIB1 JUP PFN2 GPNMB HES1 ANXA5 CLDN3 PPIA DST ACTR3 TPM1 ANXA3 HMGB1 DUSP1 TNFRSF12A ARPC5 CDC42 LMNA PFN1 S100A14 MDK ARPC5L DDT CD81 SEPTIN7 RND3 TSPO CERS2 NR4A1 TACSTD2 HSPB1 RHOF WDR66 TIMP1 ADAM9 GSTP1 EGFR NR4A2 CLDN4 CXCL17 HMGB2 PALLD NET1 TMSB4X CFL1 ARPC3 TSPAN1 ACTN4 F11R SDCBP ARF4 GPI ITGB1 …	Responder vs. Non-responder
RESPONSE TO ABIOTIC STIMULUS	0.000301811	0.00969599	-0.403217	-1.49895	HSPA1A NDRG1 PGK1 NQO1 CYBA CRIP1 MT-ATP6 ATP1B1 S100A13 TCIM LDHA MT-ND5 PSMB3 PSME2 FOS CD9 EGLN3 HSP90AA1 CHCHD2 ERO1A JUP MT-CO2 PSMA3 NUCKS1 PKM HSPA1B PSMB5 UBC CALM1 CLDN3 PSMD2 MT-ND3 FIS1 ENO1 TXN PCNA MT-CO1 PSMB9 DUSP1 PSME1 TMBIM6 PSMA6 RBX1 LMNA JUNB HILPDA PSMA7 MDK PSMD4 MT-CYB XRCC6 TSPO HSP90AB1 DNAJB1 DYNLRB1 PSMC1 EGFR NR4A2 PRKDC ZFP36L1 ERRFI1 RPA3 UBE2A PSMA4 PSMD11 ATP1A1 P…	Responder vs. Non-responder
CELL ACTIVATION	0.000200823	0.00839008	-0.406224	-1.51334	S100A9 HSPA1A S100P S100A11 LCN2 SLPI NDRG1 MYL12A NPC2 FTL CYBA S100A13 TCIM LGALS3 BST2 CTSB ACTG1 YWHAZ GNAS CD9 ALDOA PLSCR1 HSP90AA1 CEBPB MIF PRDX1 ACTB LAMTOR2 TMEM30A JUP GPNMB HEBP2 PGRMC1 DYNLT1 HES1 PKM HSPA1B FKBP1A CLIC1 CLU FTH1 PSMD2 PPIA ANXA3 KLF5 HMGB1 RNASET2 TUBB4B ARPC5 CDC42 ILF2 MDK PGAM1 PRNP CD81 FAM49B XRCC6 ZFP36L2 HSP90AB1 CST3 B2M PAK2 HSPB1 RHOF TIMP1 ADAM9 GSTP1 EGF…	Responder vs. Non-responder
RESPONSE TO ORGANIC CYCLIC COMPOUND	0.000305717	0.00969599	-0.418513	-1.52717	AKR1C3 NQO1 CYBA LDHA GNAS FOS CEBPB ACTB JUP ARPC1B NEDD8 CLU EIF4A3 MT-ND3 YWHAH EZR FIS1 ANXA3 PCNA KLF5 DUSP1 UBE2L3 JUNB ASS1 MDK MT-CYB ZFP36 TSPO ZFP36L2 HSP90AB1 NR4A1 PAK2 ADAM9 GSTP1 DDX5 EGFR NR4A2 CLDN4 CBX3 HNRNPU ZFP36L1 ERRFI1 HMGB2 ATP1A1 GCLM MT-ND6 NME1 EPHX1 PHB FDX1 URI1 PSMB2 ANXA7 PLPP1 MBD2 JUND ITGA2 RIOK3 PMEPA1 SDC1 UFM1 LGALS1 CSNK2B DDRGK1 PEA15 GSN CALM3 TIPARP ITGA6 …	Responder vs. Non-responder
SUPRAMOLECULAR FIBER ORGANIZATION	0.000829101	0.0180935	-0.427328	-1.52962	KRT17 HSPA1A DSTN ACTG1 KRT19 S100A10 ALDOA MARCKS CIB1 PFN2 ARPC1B HSPA1B TPM3 FKBP1A CLU VIM DST ACTR3 TPM1 EZR ARPC5 CDC42 PFN1 ARPC5L ARF1 CAPZA2 RND3 HSP90AB1 CST3 TPM4 B2M TACSTD2 RHOF PRKAR1A COTL1 HAX1 TMSB4X CFL1 ARPC3 ACTN4 RHOV ITGB1 TWF1 SNX9 DNAJB6 CAP1 CD2AP GSN MSRB2 ANXA2 CHP1 ENAH WASHC1 CAPZA1 DBNL SERPINH1 ABI1 ACTR2 KLHL24 AGFG1 PLOD2	Responder vs. Non-responder
EXOCYTOSIS	0.00030303	0.00969599	-0.419473	-1.54673	S100A9 HSPA1A S100P S100A11 LCN2 SLPI TAGLN2 SRGN NPC2 FTL CYBA S100A13 LGALS3 BST2 CTSB CD9 ALDOA HSP90AA1 MIF LAMTOR2 TMEM30A JUP PFN2 HEBP2 PGRMC1 DYNLT1 PKM HSPA1B ANXA5 CALM1 CLU FTH1 FAM3C PSMD2 PPIA ANXA3 HMGB1 RNASET2 TUBB4B ARPC5 ILF2 PGAM1 ARF1 FAM49B XRCC6 HSP90AB1 CST3 B2M RHOF TIMP1 GSTP1 RAB18 VAPA PSMD11 PSMB1 CTSC COTL1 TMSB4X OSTF1 TMED10 ACTN4 BRI3 SDCBP PSMD12 GPI TUBA4A SYNGR2…	Responder vs. Non-responder
ACTIN FILAMENT BASED PROCESS	0.00030947	0.00969599	-0.4327	-1.55661	DSTN BST2 ACTG1 KRT19 S100A10 PHPT1 SRI ALDOA ACTB MARCKS SMIM22 JUP PFN2 MYL6 ARPC1B TPM3 CLDN3 VIM ACTR3 TPM1 EZR ARPC5 CDC42 PFN1 MDK ARPC5L ARF1 CAPZA2 RND3 TPM4 TACSTD2 RHOF ATP1A1 PALLD PRKAR1A COTL1 HAX1 TMSB4X CFL1 ARPC3 MYO6 ACTN4 F11R SDCBP RHOV ITGB1 TWF1 SNX9 DNAJB6 MYO1E CAP1 RALA CD2AP CNN3 GSN MSRB2 ARHGDIB PDLIM5 ENAH SUMO1 WASHC1 CAPZA1 DBNL ABI1 ACTR2 CNN2	Responder vs. Non-responder
MITOCHONDRION ORGANIZATION	0.000203625	0.00839008	-0.42956	-1.56939	HSPA1A SOD2 MT-ATP6 MT-ND5 COX7A2 YWHAZ TNFSF10 HSP90AA1 CHCHD2 ROMO1 TYMP HEBP2 DYNLT1 TIMM17B GABARAPL1 CLU NDUFB2 MT-ND3 YWHAH TMEM14A FIS1 NDUFA1 GGCT MT-ATP8 ATP5F1E SSBP1 COA3 ATP5MF COX16 UQCR10 NDUFV2 UBE2L3 NDUFB11 LMNA SQSTM1 NDUFB1 NDUFA3 WDR45B TSPO UBL5 NDUFB9 NDUFA5 MX1 YWHAB PRDX3 DNAJC15 NDUFB5 ATP5PD GCLM MT-ND6 NDUFAB1 HAX1 JTB PHB ATP5F1C DNAJC19 NDUFA6 NDUFC1 NDUFA13 UQCC2 NDU…	Responder vs. Non-responder
APOPTOTIC SIGNALING PATHWAY	0.000204855	0.00839008	-0.435174	-1.5788	S100A9 HSPA1A IFI27 LCN2 MUC1 SOD2 SRGN CRIP1 LGALS3 DAPL1 PERP YWHAZ TNFSF10 ERO1A CEBPB MIF CIB1 BEX3 HNRNPK HSPA1B BCAP31 MCL1 CLU SIVA1 YWHAH TMEM14A FIS1 ENO1 GGCT ATF3 TMBIM6 TNFRSF12A LMNA PAK2 HSPB1 GSTP1 DDX5 YWHAB SKIL NR4A2 PRKDC HMGB2 GCLM CTSC IFI16 RBCK1 URI1 BCL3 NDUFA13 PDCD10 YWHAG SLC25A5 PEA15 BNIP3L PPP1CA GSN CTSH UBE2K ITGA6 SOD1 DAP BNIP3 DNAJA1 GRINA BIK NMT1 AKT1 UBQLN1 L…	Responder vs. Non-responder
OXIDATION REDUCTION PROCESS	0.000201776	0.00839008	-0.430491	-1.59225	SOD2 PGK1 MT-ND4L CP AKR1C3 NQO1 FTL CYBA TXNRD1 GLRX LDHA MT-ND5 COX6C COX7A2 GNAS ALDOA EGLN3 UGDH PTGR1 ERO1A GPX2 PRDX1 PFKP BLVRB MT-CO2 MGST3 CYB5A PKM CALM1 FTH1 NDUFB2 RDH10 MT-ND3 ENO1 NDUFA1 TXN SELENBP1 SQOR MT-CO1 UQCR10 NDUFV2 NDUFB11 ASPH PGAM1 MT-CYB ALDH2 NDUFB1 DCXR NDUFA3 FASN NDUFB9 NDUFA5 TKT PRDX3 DNAJC15 SDHC NDUFB5 MT-ND6 NDUFAB1 COX7B SRXN1 SCP2 FDX1 SCD GPI PHLDA2 COA6 GS…	Responder vs. Non-responder
REGULATION OF CYTOSKELETON ORGANIZATION	0.00020938	0.00839008	-0.454983	-1.61195	S100A9 HSPA1A DSTN BST2 S100A10 PHPT1 SMIM22 CIB1 PFN2 DYNLT1 ARPC1B HSPA1B ACTR3 TPM1 ARPC5 CDC42 PFN1 MDK ARPC5L ARF1 CAPZA2 RND3 CHMP4B TACSTD2 RHOF HNRNPU CHMP1B COTL1 HAX1 TMSB4X CFL1 ARPC3 PFDN2 NSFL1C F11R RHOV TWF1 CLTC SNX9 KATNBL1	Responder vs. Non-responder
INNATE IMMUNE RESPONSE	0.000203397	0.00839008	-0.44238	-1.61908	S100A9 HSPA1A IFI27 LCN2 IFITM3 MUC1 SLPI IFITM1 CYBA ISG15 OAS1 LGALS3 BST2 CTSB ACTG1 APOL1 PSMB3 PSME2 PLSCR1 MIF PRDX1 PSMA3 HSPA1B PSMB5 UBC CLU VIM PSMD2 ACTR3 PSMB9 HMGB1 PSME1 PSMA6 TUBB4B CDC42 ASS1 PSMA7 S100A14 PSMD4 CAPZA2 ADAR XRCC6 ISG20 HSP90AB1 B2M PAK2 PSMC1 MX1 USP14 PRKDC HMGB2 PSMA4 PSMD11 PSMB1 IFI16 CALCOCO2 IFI35 IRF6 PSMD12 PSMB2 GBP2 TSPAN6 IFITM2 CTSL RIOK3 PSMA2 PSMB8 G…	Responder vs. Non-responder
MAINTENANCE OF LOCATION	0.000990644	0.0199856	-0.484777	-1.62709	S100A9 LCN2 SRGN FTL CYBA SRI ERO1A SMIM22 JUP ANXA5 FKBP1A CALM1 FTH1 EZR TXN HILPDA TSPO YWHAB HNRNPU TMSB4X BCL3 TWF1 G3BP2 MTLN SKP1 GSN CALM3 GOLPH3 SQLE AKT1 GPAA1 CALM2 PLIN2	Responder vs. Non-responder
EPITHELIUM DEVELOPMENT	0.000202368	0.00839008	-0.449098	-1.65244	KRT17 KRT6A PGK1 TAGLN2 AKR1C3 ELF3 LGALS3 CTSB PERP KRT19 PSMB3 PSME2 BTG1 CEBPB JUP PSMA3 HES1 PSMB5 CLDN3 VIM PSMD2 RDH10 EZR RHEB PCNA PSMB9 KLF5 CAPNS1 PSME1 PSMA6 CDC42 KRT15 PFN1 PSMA7 MDK PSMD4 PRNP SPRR2A AP2M1 FASN ZFP36 KRT10 TACSTD2 PSMC1 KRT7 ADAM9 EGFR SKIL DNPH1 PRKDC ZFP36L1 ERRFI1 PSMA4 PSMD11 PALLD PSMB1 CFL1 F11R IRF6 PSMD12 PSMB2 ANXA7 CLTC ANXA4 CBR1 ITGA2 CTSL PSMA2 SDC1 MYO…	Responder vs. Non-responder
TRANSMEMBRANE TRANSPORT	0.000100898	0.00781437	-0.456726	-1.68873	SEC61G S100A6 CYBA MT-ATP6 ATP1B1 GLRX APOL1 COX6C COX7A2 PSMB3 PSME2 SEC61B SRI ERO1A ROMO1 ACTB SGK1 TMEM30A TRAM1 MT-CO2 PSMA3 CYB5A TIMM17B ANXA5 PSMB5 UBC FKBP1A CALM1 MCL1 CLIC1 CLU PSMD2 TMCO1 YWHAH MT-ATP8 MT-CO1 PSMB9 ATP5F1E SLC39A4 PSME1 ATP5MF PSMA6 PSMA7 FXYD3 ASPH PSMD4 ARF1 MT-CYB PRNP SEC62 PLP2 SLC6A8 PSMC1 TUSC3 CLDN4 MPC2 DNAJC15 AZIN1 SLC39A1 PSMA4 PSMD11 ATP1A1 PSMB1 TSC22D3 …	Responder vs. Non-responder
ACTIVATION OF IMMUNE RESPONSE	0.000103423	0.00781437	-0.475928	-1.70808	S100A9 HSPA1A MUC1 CYBA LGALS3 CTSB ACTG1 PHPT1 PSMB3 PSME2 PLSCR1 HSP90AA1 ACTB PSMA3 ARPC1B HSPA1B PSMB5 UBC CLU PSMD2 ACTR3 EZR PSMB9 HMGB1 PSME1 PSMA6 ARPC5 CDC42 PSMA7 S100A14 PSMD4 PRNP CD81 XRCC6 HSP90AB1 PAK2 PSMC1 PRKDC PSMA4 PSMD11 PSMB1 IFI16 ARPC3 PHB RBCK1 PSMD12 PSMB2 TSPAN6 CTSL RIOK3 PSMA2 PSMB8 YES1 PSMA5 PSMC3 SKP1 PSMC4 PSMB4 CD59 PSMD3 FLOT1 MAPKAPK2 PSMB10 TANK PSMC6 CD46 PQB…	Responder vs. Non-responder
CYTOKINE MEDIATED SIGNALING PATHWAY	0.000204457	0.00839008	-0.473814	-1.72341	HSPA1A IFI27 LCN2 IFITM3 MUC1 SOD2 IFITM1 ISG15 OAS1 BST2 SOX2 PSMB3 YWHAZ PSME2 FOS HSP90AA1 MIF IL32 CIB1 PSMA3 HSPA1B PSMB5 UBC MCL1 VIM PSMD2 PPIA HNRNPA2B1 PSMB9 PSME1 PSMA6 TNFRSF12A CDC42 CEBPD RBX1 JUNB PSMA7 PSMD4 ARF1 ADAR SQSTM1 PLP2 ISG20 HSP90AB1 B2M PAK2 TIMP1 PSMC1 GSTP1 MX1 PSMA4 PSMD11 PSMB1 TMSB4X TAX1BP1 CFL1 ACTN4 RBCK1 IFI35 IRF6 PSMD12 PSMB2 GBP2 ITGB1 IFITM2 PSMA2 SDC1 PSMB…	Responder vs. Non-responder
REGULATION OF DNA TEMPLATED TRANSCRIPTION IN RESPONSE TO STRESS	0.000224972	0.00862494	-0.527777	-1.72671	HSPA1A MUC1 TCIM PSMB3 PSME2 EGLN3 CEBPB PSMA3 PSMB5 UBC PSMD2 ATF3 PSMB9 PSME1 TMBIM6 PSMA6 RBX1 PSMA7 PSMD4 DNAJB1 PSMC1 PSMA4 PSMD11 PSMB1 ELOC PSMD12 PSMB2 PSMA2 PSMB8 PSMA5 PSMC3 PSMC4 PSMB4 PSMD3 PSMB10 PSMC6 EPAS1 PSMC5 PSMC2 PSME3 PSMD7 PSMD14	Responder vs. Non-responder
REGULATION OF MULTI ORGANISM PROCESS	0.000101564	0.00781437	-0.483692	-1.77335	S100A9 HSPA1A IFI27 IFITM3 KRT6A MUC1 SLPI IFITM1 CYBA ISG15 OAS1 BST2 CTSB PSMB3 PSME2 PLSCR1 POLR2K MIF CIB1 DYNLT1 PSMA3 NUCKS1 HSPA1B PSMB5 UBC PSMD2 PPIA PSMB9 HMGB1 PSME1 PSMA6 PSMA7 S100A14 POLR2L PSMD4 ADAR XRCC6 ZFP36 CHMP4B PABPC1 ISG20 HSP90AB1 PAK2 TIMP1 PSMC1 DDX5 MX1 PRKDC POLR2H VAPA HMGB2 PSMA4 PSMD11 PSMB1 IFI16 CFL1 PSMD12 PSMB2 TSPAN6 IFITM2 CTSL RIOK3 PSMA2 POLR2J PSMB8 LGALS1…	Responder vs. Non-responder
GLYCOLYTIC PROCESS THROUGH FRUCTOSE 6 PHOSPHATE	0.00339825	0.0466743	-0.728174	-1.78444	PGK1 ALDOA PFKP PKM ENO1 PGAM1 GPI TPI1	Responder vs. Non-responder
MACROPHAGE CHEMOTAXIS	0.000534545	0.0140219	-0.816489	-1.80065	LGALS3 MIF MDK DDT CXCL17 MTUS1	Responder vs. Non-responder
HOMOTYPIC CELL CELL ADHESION	0.00100238	0.0199856	-0.655569	-1.80644	MYL12A ACTG1 GNAS CD9 ACTB JUP CLIC1 HSPB1 F11R MYL9 LGALS1	Responder vs. Non-responder
POSITIVE REGULATION OF REACTIVE OXYGEN SPECIES METABOLIC PROCESS	0.00073828	0.016623	-0.638005	-1.81497	AKR1C3 CYBA HSP90AA1 ROMO1 MT-CO2 CLU ASS1 TSPO HSP90AB1 GSTP1 EGFR	Responder vs. Non-responder
ATP METABOLIC PROCESS	0.000105075	0.00781437	-0.516391	-1.8257	HSPA1A PGK1 MT-ND4L MT-ATP6 ATP1B1 LDHA MT-ND5 COX6C COX7A2 ALDOA PFKP MT-CO2 PKM HSPA1B NDUFB2 MT-ND3 ENO1 NDUFA1 MT-ATP8 MT-CO1 GUK1 ATP5F1E ATP5MF UQCR10 NDUFV2 NDUFB11 PGAM1 MT-CYB NDUFB1 NDUFA3 TSPO NDUFB9 NDUFA5 DNAJC15 SDHC NDUFB5 ATP5PD MT-ND6 NDUFAB1 COX7B TMSB4X ATP5F1C EIF6 GPI COA6 NDUFA6 UQCR11 NDUFC1 NDUFA13 UQCC2 NDUFB8 NDUFS5 NDUFB6 NDUFS6 NDUFS2 NDUFC2 TPI1 SDHD UQCRQ NIPSNAP2 CO…	Responder vs. Non-responder
CELLULAR TRANSITION METAL ION HOMEOSTASIS	0.000238351	0.00878183	-0.610873	-1.83798	S100A9 LCN2 CP FTL SRI NEDD8 FTH1 SLC39A4 ARF1 PRNP MT1X TFRC ATOX1 SKP1 GLRX3 SOD1 ATP6AP1 ATP6V1G1	Responder vs. Non-responder
RESPONSE TO CORTICOSTEROID	0.000118259	0.00781437	-0.606958	-1.85269	AKR1C3 CYBA FOS MT-ND3 ANXA3 PCNA DUSP1 UBE2L3 ASS1 MDK ZFP36 ZFP36L2 ADAM9 GSTP1 EGFR CBX3 HNRNPU ZFP36L1 ERRFI1	Responder vs. Non-responder
POSITIVE REGULATION OF CELL GROWTH	0.000116986	0.00781437	-0.601991	-1.87244	S100A9 KRT17 CRABP2 CYBA CIB1 MAP3K13 TNFRSF12A CDC42 EIF4G1 EGFR DNPH1 SDCBP	Responder vs. Non-responder
FC RECEPTOR SIGNALING PATHWAY	0.000111334	0.00781437	-0.565836	-1.87361	ACTG1 PSMB3 PSME2 FOS HSP90AA1 ACTB PSMA3 ARPC1B PSMB5 CALM1 PSMD2 ACTR3 PSMB9 PSME1 PSMA6 ARPC5 CDC42 PSMA7 PSMD4 HSP90AB1 PAK2 PSMC1 PSMA4 PSMD11 PSMB1 ARPC3 PSMD12 PSMB2 PSMA2 PSMB8 YES1 PSMA5 PSMC3 SKP1 PSMC4 PSMB4 PSMD3 PSMB10 PSMC6 PIK3CA PSMC5 ABI1 ACTR2 PSMC2 PSME3 PSMD7 PSMD14 SHC1 PSMF1 WASL	Responder vs. Non-responder
CHLORIDE TRANSPORT	0.000133636	0.00824187	-0.853272	-1.88177	APOL1 CLIC1 FXYD3 PRNP TSPO CLDN4	Responder vs. Non-responder
PROTEIN TRANSMEMBRANE TRANSPORT	0.000369004	0.0110196	-0.667696	-1.89	SEC61G SEC61B ROMO1 TRAM1 TIMM17B MCL1 CLU SEC62 DNAJC15 DNAJC19	Responder vs. Non-responder
REGULATION OF VIRAL GENOME REPLICATION	0.00011722	0.00781437	-0.629377	-1.95156	IFI27 IFITM3 SLPI IFITM1 ISG15 OAS1 BST2 PLSCR1 NUCKS1 PPIA ADAR PABPC1 ISG20 DDX5 MX1 VAPA IFI16 IFITM2	Responder vs. Non-responder
REGULATION OF CELLULAR AMINE METABOLIC PROCESS	0.000117786	0.00781437	-0.644504	-1.983	NQO1 PSMB3 PSME2 PSMA3 PSMB5 PSMD2 PSMB9 PSME1 PSMA6 PSMA7 PSMD4 PSMC1 NR4A2 HPRT1 AZIN1 PSMA4 PSMD11 PSMB1 PSMD12 PSMB2 PSMA2 PSMB8 PSMA5 PSMC3 PSMC4 PSMB4 PSMD3 PSMB10 PSMC6 ODC1 PSMC5 PSMC2 PSME3 PSMD7 PSMD14 PSMF1	Responder vs. Non-responder
ELECTRON TRANSPORT CHAIN	0.000108038	0.00781437	-0.589219	-2.01807	MT-ND4L NQO1 CYBA TXNRD1 GLRX MT-ND5 COX6C COX7A2 GPX2 MT-CO2 CYB5A NDUFB2 MT-ND3 NDUFA1 MT-CO1 UQCR10 NDUFV2 NDUFB11 ASPH MT-CYB ALDH2 NDUFB1 NDUFA3 NDUFB9 NDUFA5 DNAJC15 SDHC NDUFB5 MT-ND6 NDUFAB1 COX7B FDX1 COA6 GSR NDUFA6 UQCR11 ADH5 NDUFC1 DHRS3 NDUFA13 NDUFB8 NDUFS5 NDUFB6 GLRX3 NDUFS6 NDUFS2 NDUFC2 SDHD UQCRQ	Responder vs. Non-responder
CORNIFICATION	0.00012791	0.00806401	-0.77173	-2.02917	KRT17 KRT6A PERP KRT19 JUP CAPNS1 KRT15 SPRR2A KRT10 KRT7	Responder vs. Non-responder
SECRETION	0.00160514	0.0480346	-0.379828	-1.33823	S100A9 HSPA1A S100P SPP1 NPC2 FTL SRGN CYBA SLPI TAGLN2 S100A11 ISG15 S100A13 LGALS3 PHPT1 AQP5 GNAS ENY2 FTH1 MDK LAMTOR2 ANXA5 HSP90AA1 RNASET2 LCN2 MT-CO2 CST3 HMGB1 MIF PGRMC1 PKM SRI RHOF TIMP1 DYNLT1 TMBIM6 FAM49B MPC2 GSTP1 ENSA ABCC3 TUBB UQCC2 CSNK2B ILF2 HSP90AB1 SERPINB1 APLP2 ARPC5 TUBA4A BRI3 HSPA1B NDUFC2 ARF1 PFN2 ALDOA TMSB4X FAM3C EZR CALM1 CALM3 NME1 COPA TMED10 CD2AP PPIA PGAM1…	PR vs. PD
REGULATION OF ANATOMICAL STRUCTURE MORPHOGENESIS	0.00163016	0.0482698	-0.413433	-1.43233	SCGB3A1 SPP1 CRABP2 PGK1 S100A13 PSME2 S100A10 EFNA1 PSMB3 CLDN3 MDK PSMA3 PSMA6 TNFRSF12A PSMA7 PSMB9 CIB1 CST3 HES1 TPM1 PSME1 FIS1 PKM PSMB5 RHOF BNIP3 BTG1 PSMD4 CFL1 PSMB8 METRN FLOT1 SEPTIN7 PSMC1 PSMA4 CDC42 ALDOA EZR MAP3K13 YWHAH PSMB2 RHOV PQBP1 PFN1 ANXA7 PSMB1 RAC3 PSMC3 RHOB RDX PSMB4 PSMA5 PSMA2 PSMC6 HTATIP2 PSMB10	PR vs. PD
NUCLEOBASE CONTAINING SMALL MOLECULE METABOLIC PROCESS	0.00134576	0.042535	-0.435122	-1.48291	NNMT PGK1 TXNRD1 GLRX MT-ATP6 LDHA ERH ENO1 UGDH ATP5F1E PFKP GUK1 MT-CO2 NME4 FASN PKM ATP5MF DBI NANS SCD CMPK1 DNPH1 MPC2 ACOT13 UPP1 QPRT ATP5PD FBP1 ALDOA TMSB4X NME1 DUT NAMPT PGAM1 AGPAT2 HPRT1 PMVK AK1 NAXE ATP5MC1 MPC1 TK1 GSR AK2 ATP5MG PARK7 EIF6 PNP MT-ATP8 BAD ADK DTYMK PPCS REXO2 ATP5PF ELOVL5 ITPA GMPR2 RFK NAPRT APRT	PR vs. PD
CELLULAR HOMEOSTASIS	0.00113355	0.0410286	-0.437896	-1.49956	S100A9 FTL TXNRD1 CYBA GLRX NQO1 CP ATP1B1 PHPT1 NEDD8 PRDX1 ENY2 FTH1 ANXA5 ERO1A LCN2 HMGB1 TMCO1 FIS1 TXN SRI BCAP31 NUCKS1 SLC39A4 BNIP3 TMBIM6 MCL1 MPC2 ATP6V0B GCLM ARF1 PRDX3 ALDOA ATOX1 CALM1 CALM3 NME1 MT2A GLRX3 ATP6V1C1 LGALS1 ANXA7 MT1X CD55 ATP1A1 TFRC UBE2C GSR HMGN3 UBE2K MT1E SOD1 PDIA4 MTLN CHP1 MCUR1 UBE2S CALM2 BAD SNAPIN QSOX1 SELENOS NOL3 PRDX5 ATP6AP1 SLC39A7 ATP6V1G1 IRS2 T…	PR vs. PD
CYTOKINE MEDIATED SIGNALING PATHWAY	0.000308928	0.0228229	-0.442716	-1.51891	HSPA1A MUC1 SOD2 ISG15 IFI27 PSME2 OAS1 PSMB3 PSMA3 HSP90AA1 PSMA6 IL32 LCN2 FOS TNFRSF12A PSMA7 PSMB9 CIB1 MIF IFITM3 PSME1 YWHAZ PSMB5 TIMP1 MCL1 VIM UBC GSTP1 PSMD4 ISG20 SQSTM1 CSNK2B HSP90AB1 CFL1 PSMB8 PSMC1 PSMA4 CDC42 HSPA1B GBP2 ARF1 TMSB4X HNRNPA2B1 IFITM2 ADAR MT2A PSMB2 PPIA PLP2 RBCK1 TAX1BP1 NFKBIA AGPAT2 SUMO1 PSMB1 PSMC3 PSMB4 IL13RA1 IFI35 PSMA5 RBX1 PSMA2 PSMC6 PSMB10 BST2 UBE2V…	PR vs. PD
REGULATION OF CYTOSKELETON ORGANIZATION	0.00126276	0.0417899	-0.455751	-1.53098	S100A9 HSPA1A DSTN PHPT1 S100A10 SMIM22 ARPC1B MDK CIB1 TPM1 RHOF DYNLT1 CAPZA2 PFDN2 HAX1 CFL1 ARPC5 ARPC5L CDC42 HSPA1B ARF1 PFN2 TMSB4X CD2AP CDK2AP2 RHOV PFN1 RAC3 RHOB RDX ARPC3 BST2 ACTR3 CHMP1B SNX9 COTL1 CAPZA1 RANBP1 DBNL CHMP4B HNRNPU CHMP5 CLTC NSFL1C TRIM27 CTTN SKA2 TACSTD2 CHMP2B CD47 CHMP3	PR vs. PD
CELLULAR RESPONSE TO CHEMICAL STRESS	0.000752284	0.0336033	-0.472397	-1.55963	HSPA1A SOD2 AKR1C3 TXNRD1 CYBA NQO1 AQP5 GPX2 PRDX1 ERO1A LCN2 FOS TPM1 TXN ROMO1 BNIP3 MCL1 PCNA GSTP1 ERRFI1 NR4A2 HSPA1B PRDX3 SRXN1 PYCR1 MBIP EIF2S1 RHOB EGFR G6PD CYCS GSR XRCC6 SOD1 RWDD1 ZFP36L1 CAT PARK7 XRCC5 BAD MAPK13 SELENOS	PR vs. PD
TRANSMEMBRANE TRANSPORT	0.000100929	0.017142	-0.45059	-1.57435	SEC61G S100A6 CYBA GLRX MT-ATP6 ATP1B1 PSME2 AQP5 CYB5A COX6C SEC61B PSMB3 APOL1 CLIC1 ATP5F1E PSMA3 TIMM17B COX7A2 ANXA5 PSMA6 ERO1A TRAM1 TESC MT-CO2 PSMA7 PSMB9 TMCO1 PSME1 ASPH ATP5MF SRI PSMB5 MT-CYB SLC39A4 ROMO1 MT-CO1 MCL1 UBC SEC62 ACTB MPC2 ARL6IP1 ABCC3 PSMD4 RNF5 ATP6V0B PHB PSMB8 MT-CO3 ATP5PD PSMC1 PSMA4 ARF1 TMSB4X ATOX1 TSC22D3 CALM1 YWHAH CALM3 SLC39A1 COX7B SLC50A1 DNAJC15 PSMB2…	PR vs. PD
CELL GROWTH	0.000324535	0.0228229	-0.491617	-1.61311	S100A9 SCGB3A1 HSPA1A SPP1 CRABP2 CYBA ENO1 LAMTOR2 HSP90AA1 TNFRSF12A CIB1 BTG1 DNPH1 HSP90AB1 PHB FBP1 CDC42 HSPA1B MAP3K13	PR vs. PD
REGULATION OF MULTI ORGANISM PROCESS	0.000101833	0.017142	-0.467884	-1.62084	S100A9 HSPA1A MUC1 CYBA SLPI ISG15 IFI27 PSME2 OAS1 PSMB3 POLR2K PSMA3 PSMA6 PSMA7 PSMB9 CIB1 HMGB1 S100A14 MIF IFITM3 PSME1 PSMB5 NUCKS1 TIMP1 HMGB2 DYNLT1 POLR2L UBC PSMD4 ISG20 HSP90AB1 CFL1 PSMB8 FLOT1 PSMC1 PSMA4 POLR2J HSPA1B HMGB3 IFITM2 NELFE ADAR CTSL PSMB2 PPIA PQBP1 NFKBIA LGALS1 SUMO1 PSMB1 PSMC3 CD55 SRPK1 PSMB4 PSMA5 PSMA2 PSMC6 PLSCR1 PSMB10 BST2 UBE2V1 XRCC6 UBE2K LGMN SNF8 TAF11 …	PR vs. PD
RESPONSE TO OXYGEN LEVELS	0.000212472	0.0198382	-0.488693	-1.63014	PGK1 NDRG1 CYBA MT-ATP6 ATP1B1 PSME2 LDHA PSMB3 CLDN3 CHCHD2 MT-ND5 ENO1 PSMA3 PSMA6 ERO1A LMNA PSMA7 PSMB9 PSME1 FIS1 PKM PSMB5 EGLN3 MT-CYB BNIP3 TMBIM6 UBC PSMD4 PSMB8 PSMC1 PSMA4 MB NR4A2 HILPDA ELOC NAMPT PSMB2 MT-ND4 PSMB1 PSMC3 PSMB4 PSMA5 RBX1 PSMA2 PSMC6 AGTRAP PSMB10 BNIP3L ZFP36L1 ELOB CAT UBB BAD PSMB7 NOL3 PSMC2 IRAK1 PSMC5 PSMD12 ATP6AP1 ATP6V1G1 VEGFA PSMD7 SLC2A1 SCFD1 AKT1 PSMD2 …	PR vs. PD
OXIDATION REDUCTION PROCESS	0.00010098	0.017142	-0.469401	-1.63951	SOD2 FTL AKR1C3 PGK1 TXNRD1 CYBA GLRX NQO1 CP LDHA PTGR1 CYB5A COX6C GNAS ADGRF5 GPX2 MT-ND5 PRDX1 ENO1 UGDH FTH1 COX7A2 PFKP SELENBP1 ERO1A MT-CO2 NDUFB2 TKT SQOR MGST3 MT-ND3 NDUFB1 TXN FASN ASPH PKM NDUFB11 DCXR EGLN3 MT-CYB BLVRB UQCR10 MT-CO1 SCD BNIP3 NDUFA1 NDUFS5 ALDH2 FDX1 NDUFAB1 NDUFA5 NDUFB8 NDUFB9 MT-CO3 PHLDA2 PGD NDUFC2 PRDX3 NDUFA3 ALDOA IDH3G CALM1 SCP2 ETFB MT-ND4L ECHS1 NDUFS6 …	PR vs. PD
POSITIVE REGULATION OF ION TRANSMEMBRANE TRANSPORT	0.00152188	0.0460327	-0.649805	-1.76602	GLRX ATP1B1 TESC SRI ARL6IP1 ARF1 TMSB4X CALM1 CALM3 SUMO1 G6PD PARK7 CHP1 CALM2 NIPSNAP2	PR vs. PD
CELLULAR TRANSITION METAL ION HOMEOSTASIS	0.0008521	0.0368763	-0.629251	-1.79718	S100A9 FTL CP NEDD8 FTH1 LCN2 SRI SLC39A4 ARF1 ATOX1 MT2A GLRX3 MT1X TFRC MT1E SOD1	PR vs. PD
ACTIVATION OF INNATE IMMUNE RESPONSE	0.000108873	0.017142	-0.551867	-1.79811	S100A9 HSPA1A MUC1 CYBA PSME2 PSMB3 PSMA3 PSMA6 PSMA7 PSMB9 HMGB1 S100A14 PSME1 PSMB5 UBC PSMD4 PSMB8 FLOT1 PSMC1 PSMA4 HSPA1B CTSL PSMB2 PQBP1 NFKBIA PSMB1 PSMC3 PSMB4 PSMA5 PSMA2 PSMC6 PSMB10 UBE2V1 XRCC6 LGMN XRCC5 UBB PSMB7 RIPK2 CNPY3 PSMC2 IRAK1 PSMC5 PSMD12	PR vs. PD
PROTEIN TRANSMEMBRANE TRANSPORT	0.000764526	0.0336033	-0.668306	-1.80474	SEC61G SEC61B TIMM17B TRAM1 ROMO1 MCL1 SEC62 DNAJC15 SRP54	PR vs. PD
ATP METABOLIC PROCESS	0.000106146	0.017142	-0.549191	-1.83301	HSPA1A PGK1 MT-ATP6 ATP1B1 LDHA COX6C MT-ND5 ENO1 ATP5F1E COX7A2 PFKP GUK1 MT-CO2 NDUFB2 MT-ND3 NDUFB1 PKM ATP5MF NDUFB11 MT-CYB UQCR10 MT-CO1 NDUFA1 NDUFS5 NDUFAB1 NDUFA5 UQCC2 NDUFB8 NDUFB9 MT-CO3 ATP5PD FBP1 HSPA1B NDUFC2 NDUFA3 ALDOA TMSB4X MT-ND4L NDUFS6 COX7B DNAJC15 MT-ND4 NDUFV2 UQCRB PGAM1 MT-ND2 SDHC AK1 NDUFB6 UQCRQ ATP5MC1 NDUFS8 NDUFC1 CYCS COA6 AK2 ATP5MG NDUFB3 PARK7 NDUFA13 EIF6 M…	PR vs. PD
NEGATIVE REGULATION OF VIRAL GENOME REPLICATION	0.000906618	0.0375047	-0.707953	-1.83465	SLPI ISG15 OAS1 IFITM3 ISG20 IFITM2 SRPK1 PLSCR1 BST2 BANF1	PR vs. PD
PROTEASOMAL UBIQUITIN INDEPENDENT PROTEIN CATABOLIC PROCESS	0.000265534	0.0213413	-0.797684	-1.94715	PSMB3 PSMA3 PSMA6 PSMA7 PSMB9 PSMB5 PSMB8 PSMA4 PSMB2 PSMB1 PSMB4 PSMA5 PSMA2 PSMB10	PR vs. PD
REGULATION OF CELLULAR AMINE METABOLIC PROCESS	0.000120729	0.017142	-0.674871	-1.96328	NQO1 PSME2 PSMB3 PSMA3 PSMA6 PSMA7 PSMB9 PSME1 PSMB5 PSMD4 PSMB8 PSMC1 PSMA4 NR4A2 PSMB2 PSMB1 HPRT1 PSMC3 PSMB4 PSMA5 AZIN1 PSMA2 PSMC6 PSMB10 PARK7 PSMB7 PSMC2 PSMC5 PSMD12 PSMD7 PSMD2 PNKD PSMA1	PR vs. PD
ELECTRON TRANSPORT CHAIN	0.000109469	0.017142	-0.613275	-1.98285	TXNRD1 CYBA GLRX NQO1 CYB5A COX6C GPX2 MT-ND5 COX7A2 MT-CO2 NDUFB2 MT-ND3 NDUFB1 ASPH NDUFB11 MT-CYB UQCR10 MT-CO1 NDUFA1 NDUFS5 ALDH2 FDX1 NDUFAB1 NDUFA5 NDUFB8 NDUFB9 MT-CO3 NDUFC2 NDUFA3 ETFB MT-ND4L NDUFS6 COX7B DNAJC15 MT-ND4 NDUFV2 UQCRB GLRX3 MT-ND2 SDHC NDUFB6 UQCRQ NDUFS8 NDUFC1 CYCS GSR COA6 NDUFB3 PARK7 NDUFA13	PR vs. PD
SIGNAL TRANSDUCTION BY PROTEIN PHOSPHORYLATION	0.00232794	0.0344722	-0.375356	-1.39582	GPNMB IGFBP3 SOX2 ACKR3 CCL20 ATF3 ZFP36 PSMD2 ADAM9 CD24 CD81 LTBR ZFP36L2 CALM1 NTRK2 PAK2 LBH IGFBP4 MAP3K13 MIF EZR PSMD11 MUC20 CTSH RBX1 UBC DVL3 CIB1 PABPN1 BMP2 FGFR2 NENF DUSP5 CDC42 TGFB1 NDRG2 MAP2K2 PSMB5 PSMD12 UCHL1 PSMB3 PSMC4 PDCD10 ZFP36L1 RAP1B FBLN1 DLG1 PSME3 NPTN KRAS GADD45B MAP3K2 PSMF1 SKP1 SDCBP EGFR LAMTOR2 MAPKAPK2 MAPK1 ATP6AP2 STK24 APP PSMD3 EFNA1 PTPN2 MID1 DNAJA1 P…	PR vs. SD
POSITIVE REGULATION OF CELLULAR COMPONENT ORGANIZATION	0.000701614	0.0156694	-0.370427	-1.40029	LCN2 TNFSF10 TMEM30A CLDN1 NSD3 CLU YWHAZ TSPAN1 PFN2 ACTN4 ADAM9 ACTR3 EIF4G1 CRABP2 TWF1 HSPA1B GSN NTRK2 DAB2 PDCD5 SKIL TP63 B2M MAP3K13 YWHAH HNRNPA2B1 HNRNPK ITGA6 RBX1 BIK DYNLT1 PFN1 UBL5 HNRNPD DVL3 EIF5A DSTN HSP90AA1 CIB1 HNRNPU SERPINF1 GATA3 G3BP2 CCT6A OPTN CDC42 SDC1 NSFL1C TGFB1 MAP2K2 VCP ITGA2 SFPQ BRD4 PSMC4 ARPC5 KATNBL1 LCP1 RAP1B DLG1 RESF1 ARF1 NPTN ARPC5L YWHAG DNM1L PLXNB…	PR vs. SD
SECRETION	0.0002002	0.00855348	-0.374087	-1.41908	LCN2 S100A11 CD9 CTSB CXCL1 BST2 JUP SGK1 SLPI TMEM30A TAGLN2 GPI ALDOA ANXA3 PSMD2 CLU HEBP2 TUBB4B PFN2 GLUL ACTN4 ADAM9 SRI PKP1 ITGB6 GJA1 NLRP2 HSPA1B CD109 CALM1 GSN NTRK2 PPIA SYNGR2 CYB5R3 FAM3C B2M MIF EZR SELENOP PSMD11 VAPA NIBAN2 CTSH CTSC OSTF1 MYO6 DYNLT1 XRCC6 FERMT1 ISG15 GAPDH SELENOM ARL4D GIPC1 CKAP4 HSP90AA1 DSP CNN2 GATA3 PGAM1 MYH9 TNFAIP3 GNAS SDC1 ABCA13 TGFB1 PGRMC1 PSMD1…	PR vs. SD
RESPONSE TO ABIOTIC STIMULUS	0.000400761	0.0119233	-0.376145	-1.42241	CD9 TCIM JUP CLDN1 SERPINB13 PSMD2 NDRG1 NET1 ACTN4 CD24 IGFBP2 DNAJB1 NQO1 IGFBP7 IFI16 EGLN3 YBX3 MMP7 PGK1 LTBR GJA1 HSPA1B CALM1 MT-ND5 BCL3 JUND PRKDC FOS TSPO MBD2 JUNB GJB6 PSMD11 F11R RBX1 XRCC6 UBC HNRNPD HSPH1 BHLHE40 ERO1A HSP90AA1 SERPINF1 BMP2 CNN2 NUCKS1 GATA3 AHCY EIF4EBP1 ITGB1 FNTA EGR1 PSMB5 MMP14 PSMD12 VCP ITGA2 NUP54 UBQLN1 PSMB3 PSMC4 PKM ATP1B1 ZFP36L1 SLC38A2 DNAJB6 PTPRK …	PR vs. SD
CELLULAR COMPONENT MORPHOGENESIS	0.000806533	0.0165389	-0.383409	-1.43294	CD9 MYL12B ACTG1 SGK1 KRT19 ALDOA RND3 CLU ACTN4 ACTB CRABP2 GJA1 PALLD NTRK2 SKIL S100A6 LAMB3 MAP3K13 YWHAH EZR TACSTD2 NIBAN2 PTPRZ1 F11R CLDN4 DYNLT1 PIK3CA DVL3 HSP90AA1 CIB1 GATA3 LAMC2 FGFR2 MYH9 ITGB1 ABI1 ZNF385A NTN4 CDC42 MAP2K2 ENAH UCHL1 POF1B FBLN1 DLG1 S100A13 NPTN DNM1L PLXNB2 CDC42SE1 PARD3 SEMA3C RAC2 NBL1 CDH3 EGFR HES1 MAPK1 SEPTIN7 APP BCL6 AFG3L2 PRKAR1A EFNA1 ACTR2 TMOD3 SE…	PR vs. SD
REGULATION OF CELLULAR LOCALIZATION	0.000605388	0.0143895	-0.384698	-1.43648	IFI27 JUP TMEM30A PRNP FKBP1A ZFP36 YWHAZ GLUL CD81 ACTB SRI AP2M1 CALM1 GSN DAB2 PDCD5 TP63 YWHAH EZR TMEM98 UBL5 FERMT1 DVL3 HSP90AA1 CIB1 HNRNPU ITGB1 CCT6A TRIM29 CDC42 NSFL1C TGFB1 MAP2K2 ABHD17C MMP14 BCAP31 NUP54 PDCD10 ZFP36L1 LCP1 DLG1 ARF1 NPTN YWHAG PARD3 CLTC RAC2 UBE2L3 CDH3 DDRGK1 PML BAG4 EGFR MAPK1 PIM3 TMBIM6 ANXA2 LGALS3 DNAJA1 PRKCI SPIDR LMAN1 GCC2 HCLS1 TMBIM1 ANKRD13A NPEPPS…	PR vs. SD
CELL CELL SIGNALING	0.000501756	0.0132027	-0.38147	-1.43748	GABRP GPNMB SOX2 TNFSF10 JUP PTHLH PRNP CCL20 PSMD2 NRARP PFN2 GLUL CD24 IGFBP2 SRI NQO1 GJA1 USP14 AP2M1 CALM1 KLF5 NTRK2 DAB2 IGFBP4 TP63 YWHAH MBD2 PSMD11 NIBAN2 GJB2 RBX1 PFN1 PLK2 UBC FERMT1 EIF4A3 DVL3 PDLIM4 SELENOM GIPC1 SYPL1 TLE5 BMP2 GATA3 AFDN FGFR2 TNFAIP3 ITGB1 GNAS EGR1 CDC42 SDC1 NDRG2 PSMB5 PSMD12 VCP PSMB3 PSMC4 RAP1B DLG1 PSME3 ARF1 NPTN YWHAG KRAS DNM1L SNAI2 CLTC CDH3 PSMF1 S…	PR vs. SD
CELL PROJECTION ORGANIZATION	0.000300631	0.0101547	-0.380768	-1.43993	LCN2 SGK1 TMEM30A PRNP FXR1 TUBB4B PFN2 EMP1 ACTB ACTR3 CRABP2 TWF1 GJA1 PALLD FXYD5 KLF5 GSN NTRK2 PAK2 SKIL S100A6 MAP3K13 TSPO YWHAH EZR TACSTD2 ITGA6 VAPA NIBAN2 PTPRZ1 TUBA1A ATXN10 DYNLT1 PFN1 PLK2 PIK3CA DVL3 HSP90AA1 CIB1 SERPINF1 GATA3 LAMC2 FGFR2 MYH9 ITGB1 ABI1 NTN4 CDC42 MAP2K2 ENAH UCHL1 ITGA2 ARPC5 PTPRK ARF1 NPTN SDCCAG8 YWHAG DNM1L PLXNB2 PARD3 SEMA3C SCARB2 RAC2 NBL1 BAG4 SDCBP F…	PR vs. SD
REGULATION OF CELL DIFFERENTIATION	0.00020014	0.00855348	-0.382038	-1.45188	IFITM1 IGFBP3 SOX2 PTHLH TMEM30A CEBPD BTG1 SERPINB13 ZFP36 PSMD2 NRARP ACTN4 CD24 EIF4G1 CRABP2 ZFP36L2 TWF1 GJA1 HSPA1B CD109 KLF5 NTRK2 JUND DAB2 FOS LBH SKIL TP63 B2M MAP3K13 TSPO YWHAH JUNB TACSTD2 LSM1 TMEM98 ITGA6 PSMD11 NIBAN2 PTPRZ1 F11R DYNLT1 PLK2 DDX5 ISG15 DVL3 BHLHE40 JAG1 CIB1 HNRNPU SERPINF1 BMP2 GATA3 FGFR2 MYL9 ITGB1 ZNF385A GNAS CDC42 TGFB1 MAP2K2 PSMB5 MMP14 PSMD12 CD46 SMAP1 …	PR vs. SD
NEGATIVE REGULATION OF RESPONSE TO STIMULUS	0.0002002	0.00855348	-0.383774	-1.45616	CD9 TCIM IGFBP3 SOX2 TNFSF10 BST2 SMCHD1 ACKR3 PRNP TMEM14A ATF3 PSMD2 CLU NRARP IGFBP2 URI1 SRI IFI16 YBX3 GJA1 HSPB1 HSPA1B USP14 CD109 CALM1 BCL3 DAB2 PRKDC LBH IGFBP4 SKIL DHRS3 TP63 MIF EZR ITGA6 PSMD11 NIBAN2 RBX1 RIOK3 PLK2 UBC FERMT1 EIF4A3 MCL1 DVL3 JAG1 CIB1 SERPINF1 TLE5 BMP2 GATA3 TNFAIP3 NENF ITGB1 OPTN ZNF385A DUSP5 EGR1 CDC42 TGFB1 NDRG2 PMEPA1 PSMB5 MMP14 ADAR PSMD12 UCHL1 CD46 IF…	PR vs. SD
ENZYME LINKED RECEPTOR PROTEIN SIGNALING PATHWAY	0.000504032	0.0132027	-0.390898	-1.46116	IGFBP3 ACTG1 FKBP1A ADAM9 IGFBP2 ACTB ACTR3 HSPB1 CD109 AP2M1 NTRK2 DAB2 PAK2 FOS IGFBP4 SKIL YES1 NIBAN2 MUC20 F11R UBC FERMT1 DDX5 PIK3CA GIPC1 HSP90AA1 POLR2H BMP2 NUCKS1 GATA3 FGFR2 EIF4EBP1 FNTA ABI1 EGR1 MYO1E CDC42 TGFB1 PMEPA1 ZFAND5 IFI6 ARPC5 PTPRK POLR2K FAM83B NPTN SHKBP1 PARD3 PSENEN HNRNPF NBL1 CDH3 PML SDCBP EGFR HES1 ADIPOR1 MAPKAPK2 VPS25 FKBP8 MAPK1 TXNIP APP PLAT NCK2 EFNA1 POL…	PR vs. SD
REGULATION OF MRNA METABOLIC PROCESS	0.00226991	0.0344597	-0.402933	-1.46376	HNRNPL FXR1 ZFP36 PSMD2 YWHAZ PKP1 EIF4G1 YBX3 ZFP36L2 HSPB1 RBM42 HNRNPA2B1 HNRNPK PSMD11 PABPC1 SRSF9 UBC DDX5 HNRNPD NCL PABPN1 HNRNPU TAF15 RBM8A PSMB5 PSMD12 PSMB3 PSMC4 ZFP36L1 SF3B4 PSME3 PSMF1 YTHDC1 MAPKAPK2 UPF1 PSMD3 TOB1 RBM17 PSMD8 DAZAP1 IGF2BP2 RBFOX2 PSMB1 TRA2B HNRNPM PSMD4 WTAP PAIP1 MBNL1 PSMD10 SAFB SET KHDRBS1 XRN1 ZBTB7A SRSF2 CNOT6L SAMD4B RC3H1 PAF1 PSMD14 AKT1 PSMC1 REST …	PR vs. SD
POSITIVE REGULATION OF MULTICELLULAR ORGANISMAL PROCESS	0.00010014	0.00607786	-0.393779	-1.49192	KRT17 IFITM1 LCN2 JUP TMEM30A GPI CEBPD ANXA3 BTG1 CLU ADAM9 CD24 CD81 IFI16 EIF4G1 YBX3 CRABP2 TWF1 GJA1 NLRP2 HSPB1 HSPA1B BCL3 NTRK2 JUND DAB2 PRKDC FOS LBH CEBPG SKIL TP63 B2M MAP3K13 TSPO MIF EZR LSM14A ITGA6 NIBAN2 CTSH PTPRZ1 F11R DYNLT1 XRCC6 RIOK3 PFN1 PLK2 FERMT1 ISG15 DVL3 GAPDH JAG1 CIB1 SERPINF1 POLR2H BMP2 GATA3 FGFR2 TNFAIP3 ITGB1 GNAS EGR1 CDC42 TGFB1 MAP2K2 MMP14 CD46 SMAP1 ITGA2…	PR vs. SD
REGULATION OF ANATOMICAL STRUCTURE MORPHOGENESIS	0.000403755	0.0119233	-0.405681	-1.51431	MYL12B GPNMB JUP ALDOA ANXA3 BTG1 RND3 PSMD2 NRARP GLUL ACTN4 ADAM9 PGK1 CRABP2 GJA1 HSPB1 AP2M1 NTRK2 DAB2 SKIL MAP3K13 YWHAH EZR TACSTD2 PSMD11 NIBAN2 CTSH F11R CLDN4 PFN1 PLK2 DVL3 JAG1 CIB1 SERPINF1 BMP2 GATA3 FGFR2 MYH9 TNFAIP3 ITGB1 NTN4 CDC42 TGFB1 MAP2K2 PSMB5 PSMD12 PSMB3 PSMC4 PKM PDCD10 FBLN1 DLG1 PSME3 S100A13 DNM1L PLXNB2 CDC42SE1 SNAI2 CLTC SEMA3C RAC2 ITGB8 PSMF1 PML HES1 SEPTIN7 B…	PR vs. SD
GROWTH	0.000506073	0.0132027	-0.407414	-1.51503	KRT17 CD9 IGFBP3 SOX2 BST2 SGK1 RDH10 BTG1 NET1 IGFBP2 URI1 CD81 IGFBP7 EIF4G1 YBX3 CRABP2 GJA1 ACTL6A HSPA1B KLF5 GSN PAK2 PRKDC IGFBP4 MAP3K13 EZR SELENOP ZNF639 TMPRSS4 PIK3CA SELENOM HSP90AA1 CIB1 TLE5 GATA3 MT1X FGFR2 ITGB1 GNAS CDC42 TGFB1 SMARCA2 MMP14 PKM TAF10 ZFP36L1 CXCL16 PRAME TMEM97 SEMA3C PML SDCBP EGFR ADIPOR1 LAMTOR2 FKBP8 MAPK1 APP BCL6 AFG3L2 ANXA2 PRKAR1A SEMA4B STAT3 CSNK2A1 …	PR vs. SD
POSITIVE REGULATION OF PHOSPHORUS METABOLIC PROCESS	0.000403755	0.0119233	-0.409126	-1.52717	GPNMB TCIM IGFBP3 SOX2 ACKR3 PRNP CCL20 FXR1 CLU PFN2 ADAM9 CD24 CD81 EIF4G1 PGK1 LTBR CALM1 NTRK2 DAB2 PAK2 IGFBP4 DAZAP2 MAP3K13 MIF YES1 ITGA6 CDK2AP1 MUC20 XRCC6 UBC PIK3CA DVL3 HSP90AA1 CIB1 BMP2 FGFR2 NENF ABI1 DUSP5 EGR1 CDC42 TGFB1 MAP2K2 VCP ITGA2 PDCD10 RAP1B DLG1 NPTN KRAS GADD45B PTGES3 STAP2 MAP3K2 DDRGK1 BAG4 SDCBP EGFR HES1 LAMTOR2 MAPKAPK2 MAPK1 STK24 APP ANXA2 PRKAR1A EFNA1 PPP1R…	PR vs. SD
DEFENSE RESPONSE	0.00010013	0.00607786	-0.404867	-1.53457	KRT6A IFITM1 LCN2 IFI27 IFITM3 CTSB CXCL1 BST2 ACTG1 SLPI PLSCR1 CLDN1 CCL20 ANXA3 PSMD2 CLU OAS1 TUBB4B IRF6 CFB CD81 ACTR3 MX1 IFI16 EIF4G1 ROMO1 ITGB6 GJA1 NLRP2 HSPA1B USP14 GSN BCL3 PAK2 PRKDC FOS CEBPG IGFBP4 B2M MIF LSM14A MUC16 PSMD11 APOL1 MUC20 F11R CTSC ELF3 XRCC6 RIOK3 UBC ISG15 GAPDH ASS1 SERPINF1 BMP2 GATA3 AHCY TNFAIP3 G3BP2 ITGB1 OPTN EGR1 TRIM29 TGM2 CDC42 SDC1 TGFB1 PSMB5 IL32 A…	PR vs. SD
POSITIVE REGULATION OF MOLECULAR FUNCTION	0.00010005	0.00607786	-0.404075	-1.53639	PERP TCIM CXCL1 TNFSF10 JUP SGK1 PLSCR1 BEX3 HNRNPL PRNP CCL20 ANXA3 FKBP1A CLU NET1 PFN2 ACTN4 ADAM9 CD24 DNAJB1 CD81 IFI16 EGLN3 EIF4G1 UBA2 ALDH1A1 TACC1 NLRP2 HSPA1B CALM1 GSN NTRK2 PAK2 PDCD5 CEBPG DAZAP2 B2M MAP3K13 RALBP1 MIF MBD2 HNRNPA2B1 ATP1B3 ITGA6 NIBAN2 MUC20 CTSH F11R CLDN4 XRCC6 PFN1 PLK2 UBC PIK3CA HNRNPD DVL3 HSP90AA1 CIB1 PABPN1 HNRNPU DNAJC19 BMP2 GATA3 AFDN FGFR2 ITGB1 FNTA A…	PR vs. SD
REGULATION OF CELL POPULATION PROLIFERATION	0.00010013	0.00607786	-0.407651	-1.5453	KRT6A IFITM1 S100A11 CD9 GPNMB IGFBP3 CXCL1 SOX2 BST2 SAT1 JUP SGK1 PTHLH CAPNS1 RARRES1 CLDN1 PRNP BTG1 ATF3 ZFP36 CLU NDRG1 NRARP GLUL IRF6 CD24 IGFBP2 CD81 IGFBP7 EGLN3 SERTAD1 ROMO1 GJA1 PLPP1 HSPA1B CD109 KLF5 NTRK2 PDCD5 PRKDC LBH S100A6 SERPINB5 TP63 B2M TSPO MIF MBD2 GJB6 TACSTD2 YES1 NIBAN2 CTSH PTPRZ1 XRCC6 FERMT1 EIF5A JAG1 CIB1 HNRNPU SERPINF1 BMP2 GATA3 LAMC2 FGFR2 TNFAIP3 ITGB1 ABI1…	PR vs. SD
PROTEIN HOMOOLIGOMERIZATION	0.00227939	0.0344597	-0.455473	-1.55396	LCN2 MARCKS CLDN1 PRNP ALDOA CLU GLUL AKR1C1 TP63 B2M MIF CHMP4B ATXN10 RIOK3 G3BP2 TGM2 VCP NUP54 PKM TAF10 SOD2 DNM1L SHKBP1 SLC1A5 HPRT1 RYR1 SAMHD1 TNFAIP1 EVL PFKP RNF213	PR vs. SD
CYTOSKELETON ORGANIZATION	0.000100241	0.00607786	-0.414749	-1.56609	KRT17 KRT6A KRT5 KRT13 KRT15 CXCL1 DST MARCKS BST2 JUP ACTG1 KRT19 ALDOA RND3 TUBB4B PFN2 ACTN4 ACTB PKP1 ACTR3 TPM4 TACC1 TWF1 GJA1 PALLD HSPA1B GSN TUBB6 EZR TACSTD2 CHMP4B KLHL24 F11R TUBA1A DYNLT1 PFN1 PLK2 SENP6 GAPDH PDLIM4 TUBA1C DSTN CIB1 DSP HNRNPU TPM3 CNN2 MYH9 TNFAIP3 ITGB1 ABI1 SVIL CDC42 NSFL1C ENAH VCP ARPC5 KATNBL1 POF1B LCP1 CHMP1B DNAJB6 DLG1 ARF1 CAPG LIMK2 COTL1 SDCCAG8 ARPC5L…	PR vs. SD
RESPONSE TO ENDOGENOUS STIMULUS	0.00010008	0.00607786	-0.412661	-1.56781	CD9 CTSB TNFSF10 JUP CLDN1 PRNP ANXA3 BTG1 ZFP36 ADAM9 IGFBP2 URI1 CD81 ACTB NQO1 IGFBP7 LPIN2 ZFP36L2 GJA1 PLPP1 CD109 KLF5 NTRK2 JUND DAB2 PDCD5 PRKDC FOS LBH SKIL AKR1C1 DSG2 TP63 MXRA5 TSPO YWHAH MBD2 JUNB EZR YES1 CTSH GJB2 F11R CLDN4 UBC FERMT1 DDX5 PIK3CA EIF4A3 HNRNPD NCL GIPC1 ASS1 CIB1 HNRNPU SERPINF1 POLR2H BMP2 NUCKS1 GATA3 FGFR2 EIF4EBP1 ITGB1 FNTA GNAS EGR1 SDC1 TGFB1 PMEPA1 FBXO32 …	PR vs. SD
APOPTOTIC SIGNALING PATHWAY	0.000203273	0.00855348	-0.423994	-1.5693	LCN2 IFI27 PERP DAPL1 TNFSF10 ACKR3 BEX3 TMEM14A ATF3 CLU YWHAZ CD24 URI1 IFI16 YBX3 LTBR HSPB1 HSPA1B GSN BCL3 PAK2 PDCD5 PRKDC SKIL TP63 YWHAH MIF HNRNPK ITGA6 CTSH BIK CTSC DDX5 MCL1 ERO1A GGCT CIB1 TNFAIP3 ZNF385A TGFB1 BCAP31 IFI6 SFPQ UBQLN1 PDCD10 PSME3 SOD2 YWHAG DNM1L SNAI2 PML TIMM50 PDIA3 GRINA STK24 TMBIM6 NCK2 SIAH2 PPP1R15A TNFRSF1A PTPN2 LGALS3 DNAJA1 CSNK2A1 MKNK2 SLC25A5 PEA15 DD…	PR vs. SD
IMPORT INTO CELL	0.000309661	0.0101547	-0.433137	-1.57102	CD9 ACTG1 ACKR3 PRNP CLU TSPAN1 GLUL ACTN4 CD81 ACTB MX1 AP2M1 GSN DAB2 B2M RALBP1 ATP1B3 EZR HNRNPK LRP10 APOL1 MYO6 TMPRSS4 HSPH1 HSP90AA1 MYH9 ITGB1 MYO1E CDC42 SMAP1 ITGA2 ATP1B1 CXCL16 DLG1 ARF1 CLINT1 DNM1L CLTC SCARB2 RAB31 RAC2 M6PR SLC1A5 TFRC SDCBP MAPKAPK2 MAPK1 APP ANXA2 LGALS3BP LGALS3 ATP1A1 ATP2B4 SNX9 SH3BP1 ADM ANKRD13A RAB21 LRP1 SLC39A4 CAV2	PR vs. SD
IMMUNE EFFECTOR PROCESS	0.00010016	0.00607786	-0.416512	-1.57641	IFITM1 LCN2 IFI27 IFITM3 S100A11 CTSB TCIM CXCL1 BST2 JUP ACTG1 SLPI TMEM30A PLSCR1 GPI ALDOA ANXA3 PSMD2 CLU HEBP2 OAS1 TUBB4B CFB CD81 ACTB PKP1 ACTR3 MX1 IFI16 HSPA1B GSN BCL3 PRKDC PPIA CEBPG CYB5R3 B2M MIF LSM14A YES1 TMEM98 PSMD11 VAPA CTSH CTSC OSTF1 DYNLT1 XRCC6 RIOK3 PIK3CA ISG15 JAG1 CKAP4 HSP90AA1 DSP CNN2 GATA3 PGAM1 TNFAIP3 ABI1 CDC42 ABCA13 TGFB1 PGRMC1 ADAR PSMD12 VCP CD46 IFI6 TSP…	PR vs. SD
GLAND DEVELOPMENT	0.000736067	0.0159553	-0.446058	-1.57734	SOX2 LSR CLDN1 IRF6 PRKDC LBH CEBPG SERPINB5 TP63 TSPO ELF3 PIK3CA HNRNPD ASS1 SERPINF1 BMP2 GATA3 FGFR2 TNFAIP3 TGM2 NTN4 CDC42 TGFB1 MAP2K2 ITGA2 PKM TAF10 PCNA KRAS OAS2 SNAI2 SEMA3C PML FKBP4 EGFR HES1 MAPK1 HMGCS1 TWSG1 USF2 WNT7B MT-CO2	PR vs. SD
CELLULAR RESPONSE TO EXTERNAL STIMULUS	0.00116934	0.0215451	-0.45537	-1.58743	LCN2 DAPL1 HNRNPL ATF3 GLUL IFI16 EIF4G1 MMP7 LTBR GJA1 FOS GABARAPL1 ITGA6 F11R TLE5 CNN2 ITGA2 WDR45B COMT SLC38A2 MAP1LC3A DNM1L SNAI2 MAP3K2 EGFR KLF10 MAPK1 RRAGA STK24 HSPA5 TNFRSF1A USF2 ATP1A1 EIF2AK2 CASTOR2 RALB GADD45A NFE2L2 ATG5 LAMP2 TMEM150C SLC39A4 DNAJC15 BAG3 WIPI1	PR vs. SD
REGULATION OF HYDROLASE ACTIVITY	0.000100371	0.00607786	-0.421606	-1.58902	PERP IGFBP3 SOX2 TNFSF10 BST2 CSTA SLPI PLSCR1 RARRES1 BEX3 PRNP CCL20 FKBP1A SERPINB13 OAS1 NET1 PFN2 URI1 DNAJB1 ANXA8 IFI16 EGLN3 ALDH1A1 NLRP2 USP14 CD109 CALM1 A2ML1 GSN NTRK2 PAK2 PDCD5 SERPINB5 ANXA8L1 TP63 RALBP1 ATP1B3 ITGA6 CTSH F11R CLDN4 DYNLT1 PPP4R1 PFN1 DVL3 GAPDH HNRNPU SERPINF1 DNAJC19 BMP2 AFDN FGFR2 ITGB1 FNTA WFDC2 VCP ARHGAP21 SMAP1 BCAP31 IFI6 ITGA2 ACAP2 ATP1B1 DNAJB6 FBLN1…	PR vs. SD
REPRODUCTION	0.000100533	0.00607786	-0.42492	-1.59606	CD9 CTSB TNFSF10 KRT19 PTHLH ALDOA RDH10 BTG1 IGFBP2 IGFBP7 ACTR3 CCNI YBX3 MMP7 GJA1 PLPP1 PRKDC FOS SKIL DSG2 SERPINB5 TP63 MBD2 JUNB SELENOP GJB2 BIK CLDN4 MORN2 CIB1 SERPINF1 DNAJC19 GATA3 FGFR2 MYH9 ITGB1 RAI14 EGR1 SDC1 XRN2 SMARCA2 MMP14 WDR66 WFDC2 CD46 BCAP31 ITGA2 COMT ZFP36L1 SLC38A2 DNAJB6 FBLN1 DLG1 PCNA LIMK2 KRAS GTSF1 ITGB8 FKBP4 EGFR HES1 KMT2B MAPK1 EIF2B5 SEPTIN7 HMGCS1 APP BCL…	PR vs. SD
RESPONSE TO CYTOKINE	0.00010022	0.00607786	-0.424454	-1.60449	IFITM1 LCN2 IFI27 IFITM3 CXCL1 SOX2 BST2 ACTG1 ACKR3 PLSCR1 CLDN1 CEBPD CCL20 ZFP36 PSMD2 YWHAZ OAS1 IRF6 ACTN4 ADAM9 CD24 ACTR3 MX1 IFI16 YBX3 LTBR ZFP36L2 HSPA1B KLF5 GSN JUND PAK2 FOS PPIA SKIL B2M MIF JUNB HNRNPA2B1 LSM14A PSMD11 PTPRZ1 RBX1 UBC PIK3CA ISG15 MCL1 GAPDH NCL GIPC1 HSP90AA1 ASS1 CIB1 HNRNPU TLE5 CNN2 GATA3 MT1X TNFAIP3 ITGB1 EGR1 CDC42 SDC1 TGFB1 PSMB5 IL32 ADAR PSMD12 PLP2 IFI6…	PR vs. SD
CELL ACTIVATION	0.00010016	0.00607786	-0.429533	-1.62642	LY6D LCN2 S100A11 CD9 MYL12A CTSB GPNMB TCIM CXCL1 BST2 JUP ACTG1 SLPI TMEM30A PLSCR1 GPI PRNP ALDOA ANXA3 FKBP1A PSMD2 CLU NDRG1 HEBP2 NRARP YWHAZ TUBB4B ADAM9 CD24 IGFBP2 CD81 ACTB PKP1 LTBR ZFP36L2 HSPB1 HSPA1B KLF5 GSN BCL3 PAK2 PRKDC PPIA CEBPG CYB5R3 B2M MIF YES1 TMEM98 PSMD11 VAPA CTSH F11R CTSC OSTF1 DYNLT1 XRCC6 PIK3CA HSPH1 CKAP4 HSP90AA1 DSP CNN2 GATA3 PGAM1 MYH9 TNFAIP3 MYL9 ITGB1 GNA…	PR vs. SD
ACTIN FILAMENT BASED PROCESS	0.000101937	0.00607786	-0.446427	-1.64419	CXCL1 MARCKS BST2 JUP ACTG1 KRT19 ALDOA RND3 PFN2 ACTN4 ACTB SRI ACTR3 TPM4 TWF1 GJA1 PALLD GSN DSG2 EZR TACSTD2 F11R MYO6 PFN1 PDLIM4 DSTN DSP TPM3 CNN2 MYH9 ITGB1 ABI1 MYO1E CDC42 MYL6 ENAH ARPC5 POF1B LCP1 DNAJB6 DLG1 ARF1 CAPG LIMK2 COTL1 ARPC5L MSRB2 KRAS RAC2 BAG4 SDCBP CSRP2 BCL6 NCK2 PRKAR1A ARPC3 ACTR2 TMOD3 PRKCI ATP1A1 PDLIM5 SNX9 ARHGDIB TNFAIP1 SH3BP1 HCLS1 FSCN1 NCK1 EVL ATP2A2 WASH…	PR vs. SD
FEMALE PREGNANCY	0.00262587	0.0367453	-0.518398	-1.65308	CTSB PTHLH IGFBP2 IGFBP7 MMP7 GJA1 FOS DSG2 JUNB GJB2 CLDN4 ITGA2 COMT SLC38A2 FBLN1 KRAS FKBP4 MAPK1 DAZAP1 UBE2A ARHGDIB ADM TRIM28 ADIPOR2	PR vs. SD
RESPONSE TO MOLECULE OF BACTERIAL ORIGIN	0.000764777	0.0161077	-0.489443	-1.65583	LCN2 CXCL1 SLPI CLDN1 ZFP36 ADAM9 CD24 GJA1 JUND FOS TSPO MIF JUNB GJB6 GJB2 ASS1 PABPN1 FGFR2 TNFAIP3 ADH5 TGFB1 COMT MAPKAPK2 MAPK1 UPF1 PTGES ADM ATP2A2 HDAC2 MALT1 PAF1 AKT1 INAVA PELI1 SBNO2 PRDX3 CASP3 GNG12 TAB2 HSF1	PR vs. SD
REGULATION OF SIGNALING RECEPTOR ACTIVITY	0.00253776	0.0359679	-0.579036	-1.66917	MTRNR2L12 LY6E KLHL24 ITGB1 FNTA DLG1 VPS25 MTRNR2L8 APP NCK2 SNX6	PR vs. SD
RESPONSE TO ORGANIC CYCLIC COMPOUND	0.000101071	0.00607786	-0.450097	-1.67832	LY6D JUP CLDN1 ANXA3 ZFP36 CLU ADAM9 MT-ND6 IGFBP2 URI1 ACTB NQO1 IGFBP7 ZFP36L2 GJA1 PLPP1 KLF5 GSN JUND DAB2 PAK2 FOS LBH DSG2 TP63 TSPO YWHAH MBD2 JUNB EZR ITGA6 GJB2 CLDN4 RIOK3 DDX5 EIF4A3 HNRNPD ASS1 HNRNPU SERPINF1 BMP2 EIF4EBP1 GNAS EGR1 SDC1 TGFB1 PMEPA1 FBXO32 MMP14 ITGA2 COMT ZFP36L1 RAP1B MAP1LC3A PCNA PLIN2 PSPH LDHA KRAS DNM1L SNAI2 UBE2L3 DDRGK1 FKBP4 EGFR MAPK1 HMGCS1 GNA15 TXNIP …	PR vs. SD
OSSIFICATION	0.000214707	0.00855348	-0.489729	-1.69044	IFITM1 GPNMB IGFBP3 SOX2 PTHLH ALYREF CEBPD TPM4 JUND DHRS3 TP63 JUNB OSTF1 DDX5 ISG15 JAG1 HNRNPU BMP2 FGFR2 GNAS TGFB1 MMP14 ADAR SNAI2 CLTC EGFR KLF10 MAPK1 RRBP1 KREMEN1 TOB1 TWSG1 RYR1 WNT7B	PR vs. SD
GLUCOSE CATABOLIC PROCESS	0.00242347	0.035194	-0.663569	-1.71565	GPI ALDOA PGK1 GAPDH PGAM1 TPI1 PKM PGM2L1 PFKP FOXK2	PR vs. SD
REGULATION OF TRANSPORTER ACTIVITY	0.000908988	0.0178646	-0.540842	-1.73724	FXYD3 SGK1 PRNP FKBP1A ACTN4 ACTB SRI GJA1 FXYD5 CALM1 YWHAH ATP1B3 KLHL24 UBQLN1 ATP1B1 DLG1 AHNAK NDFIP2 APP	PR vs. SD
BIOLOGICAL ADHESION	0.000100583	0.00607786	-0.463458	-1.73927	LY6D S100A11 CD9 MYL12A PERP GPNMB SOX2 DST JUP ACTG1 CSTA ACKR3 CLDN1 PRNP DSG3 RND3 NRARP ACTN4 ADAM9 CD24 IGFBP2 CD81 ACTB PKP1 IGFBP7 ITGB6 PALLD FXYD5 HSPB1 GSN PAK2 LAMB3 DSG2 DSC3 EZR TACSTD2 YES1 MUC16 ITGA6 F11R CLDN4 FERMT1 PIK3CA HSPH1 JAG1 ASS1 CIB1 ITGB4 DSP BMP2 GATA3 LAMC2 AFDN MYH9 MYL9 COL17A1 ITGB1 CD164 GNAS TRIM29 TGM2 NTN4 CDC42 PPFIBP1 TGFB1 IL32 MMP14 CD99 CD46 ITGA2 ATP1B1…	PR vs. SD
CELL MOTILITY	0.000100231	0.00607786	-0.460771	-1.74073	IFITM1 CD9 GPNMB IGFBP3 CXCL1 DST BST2 JUP SGK1 ACKR3 CLDN1 GPI CCL20 ANXA3 BTG1 RND3 NET1 TSPAN1 PFN2 GLUL ACTN4 ADAM9 CD24 CD81 ACTB ACTR3 ITGB6 GJA1 PALLD PLPP1 HSPB1 NTRK2 DAB2 PPIA LAMB3 TSPO MIF ATP1B3 TACSTD2 YES1 ITGA6 CTSH F11R CLDN4 PFN1 PLK2 FERMT1 PIK3CA JAG1 GIPC1 CIB1 ITGB4 SERPINF1 BMP2 GATA3 LAMC2 AFDN MYH9 TNFAIP3 ITGB1 NTN4 CDC42 SDC1 TGFB1 MAP2K2 ENAH MMP14 WDR66 ZFAND5 CD99 IT…	PR vs. SD
MUSCLE STRUCTURE DEVELOPMENT	0.000103638	0.00607786	-0.489069	-1.76131	CD9 IGFBP3 ACTG1 KRT19 BTG1 FKBP1A ATF3 FXR1 CD81 SRI YBX3 GJA1 KLF5 FOS NIBAN2 DDX5 PDLIM4 JAG1 ASS1 DSP HNRNPU BMP2 FGFR2 MYH9 ITGB1 CD164 EGR1 SVIL CDC42 SDC1 TGFB1 MYL6 MMP14 UCHL1 ZFP36L1 SOD2 KRAS HES1 MAPK1 CACYBP AFG3L2 PRKAR1A GPCPD1 TMOD3 EPAS1 RYR1 FLOT2 PDLIM5 ADM GSK3A ATP2A2 QKI RORA ATG5 MBNL1 EID2 CAV2 ANKRD17 IFRD1 MAFF COPS2 MEF2A CXADR EP300 MORF4L2 KDM1A BNIP2 TPM1 NR2F2 AKT1 …	PR vs. SD
RESPONSE TO CORTICOSTEROID	0.000813481	0.0165389	-0.568124	-1.76648	CLDN1 ANXA3 ZFP36 ADAM9 IGFBP2 IGFBP7 ZFP36L2 FOS GJB2 ASS1 HNRNPU SERPINF1 EIF4EBP1 SDC1 FBXO32 ZFP36L1 PCNA KRAS UBE2L3 EGFR WNT7B DDIT4 ADM MT-ND3 CDKN1A FOSB CBX3 REST CASP3 ATP2B1 BCL2L11	PR vs. SD
VIRAL LIFE CYCLE	0.000104058	0.00607786	-0.493092	-1.77013	IFITM1 IFI27 IFITM3 CTSB BST2 SLPI PLSCR1 CLDN1 OAS1 CD81 MX1 IFI16 ITGB6 HSPA1B GSN PCBP1 PPIA CHMP4B VAPA F11R PABPC1 DYNLT1 ZNF639 UBC DDX5 ISG15 NUCKS1 ITGB1 CDC42 ADAR VCP CD46 ITGA2 NUP54 CHMP1B RESF1 OAS2 SCARB2 SLC1A5 PML TFRC EGFR NECTIN4 EIF2AK2 PCBP2 OAS3 USP6NL TRIM28 ATG5 TPR P4HB RANBP2 CAV2 WWP1 SLC20A2 HTATSF1 NECTIN2 CXADR DDX3X KPNA2 TBC1D20 HACD3 VPS28 VPS4B HSP90AB1 ILF3	PR vs. SD
DIGESTION	0.000770416	0.0161077	-0.714769	-1.78472	SGK1 TYMP AKR1C1 EZR F11R PIR STRAP TJP2 UGCG COPA INAVA	PR vs. SD
CELL CELL ADHESION	0.000102638	0.00607786	-0.488969	-1.78832	S100A11 CD9 MYL12A PERP GPNMB SOX2 JUP ACTG1 CSTA CLDN1 PRNP DSG3 NRARP ADAM9 CD24 IGFBP2 CD81 ACTB PKP1 PALLD FXYD5 HSPB1 PAK2 DSG2 DSC3 EZR YES1 ITGA6 F11R CLDN4 PIK3CA HSPH1 JAG1 ASS1 DSP BMP2 GATA3 AFDN MYH9 MYL9 ITGB1 CD164 GNAS TRIM29 CDC42 TGFB1 CD99 CD46 ZFP36L1 DNAJB6 DLG1 NPTN PLXNB2 SNAI2 RAC2 CDH3 TFRC EGFR HES1 LRRC1 GOLPH3 BCL6 ANXA2 NCK2 PRKAR1A TWSG1 RAP2B PTPN2 TMOD3 NECTIN4 LGAL…	PR vs. SD
CARDIAC CONDUCTION	0.000368143	0.0115456	-0.641133	-1.80376	FXYD3 JUP SRI GJA1 CALM1 DSG2 ATP1B3 DSP ATP1B1 KCNK1 RYR1 ATP1A1 ATP2B4 ATP2A2 MEF2A CXADR	PR vs. SD
REGULATION OF CYTOSOLIC CALCIUM ION CONCENTRATION	0.000461574	0.0130838	-0.578159	-1.81167	ACKR3 PRNP FKBP1A CD24 SRI GJA1 CALM1 ERO1A TGM2 BCAP31 NPTN PML GNA15 TMBIM6 ANXA2 RYR1 SPPL3 ATP2B4 ADM GNA13 GNB1 ATG5 LRP1 FIS1 GTF2I	PR vs. SD
ANATOMICAL STRUCTURE FORMATION INVOLVED IN MORPHOGENESIS	0.000101112	0.00607786	-0.487933	-1.81374	CD9 PERP GPNMB SOX2 SAT1 JUP ACTG1 KRT19 ACKR3 TYMP RDH10 ANXA3 BTG1 FKBP1A NRARP GLUL ADAM9 CD81 PGK1 GJA1 HSPB1 ACTL6A CD109 KLF5 BCL3 PRKDC SKIL LAMB3 TP63 JUNB ITGA6 NIBAN2 CTSH ETS2 PFN1 PLK2 PIK3CA DVL3 NCL JAG1 CIB1 ITGB4 SERPINF1 BMP2 GATA3 FGFR2 MYH9 TNFAIP3 ITGB1 ABI1 ZNF385A TGM2 WDR72 CDC42 TM4SF1 TGFB1 MAP2K2 MMP14 ITGA2 PKM PDCD10 SDCCAG8 PLXNB2 SNAI2 SEMA3C ITGB8 PML HES1 MAPK1 BCL…	PR vs. SD
RESPONSE TO WOUNDING	0.000103455	0.00607786	-0.50415	-1.82227	KRT6A CD9 MYL12A SOX2 DST ACTG1 PLSCR1 CLDN1 ZFP36 YWHAZ CD81 ACTB ANXA8 ZFP36L2 GJA1 HSPB1 CD109 KLF5 GSN TSPO F11R CLDN4 TMPRSS4 PIK3CA ITGB4 DSP GATA3 FGFR2 MYH9 TNFAIP3 MYL9 GNAS CDC42 SDC1 TGFB1 MAP2K2 ITGA2 PKM PDCD10 ZFP36L1 FBLN1 CDH3 EGFR MAPK1 STK24 GNA15 ANXA2 PLAT KREMEN1 PRKAR1A RAP2B LMAN1 ADM CD44 FZD6 GNA13 GNB1 PLEC NFE2L2 LRP1 GNAQ ADIPOR2 PIK3R1 FGFR1OP2 IFRD1 MAFF CASK HDAC2 D…	PR vs. SD
MUSCLE CONTRACTION	0.00011241	0.00607786	-0.559615	-1.82283	MYL12A MYL12B JUP ALDOA SRI TPM4 GJA1 CALM1 DSG2 CALD1 SLC6A8 PIK3CA PABPN1 DSP TPM3 MYL9 MYL6 ITGA2 ATP1B1 DLG1 TMOD3 RYR1 ATP1A1 ATP2B4 HSBP1 GAA ATP2A2	PR vs. SD
HEMIDESMOSOME ASSEMBLY	0.00078637	0.0163255	-0.792846	-1.82593	KRT5 DST LAMB3 ITGA6 ITGB4 LAMC2 COL17A1	PR vs. SD
EPITHELIUM DEVELOPMENT	0.000100452	0.00607786	-0.491131	-1.84771	KRT17 KRT6A KRT5 KRT13 CTSB PERP KRT15 SPRR2A JUP KRT19 CSTA CAPNS1 RHCG CLDN1 TAGLN2 PRNP RDH10 DSG3 BTG1 SERPINB13 ZFP36 PSMD2 NRARP IRF6 ADAM9 CD24 PKP1 PGK1 GJA1 PALLD CD109 AP2M1 KRT23 KLF5 DAB2 PRKDC LBH SKIL AKR1C1 DSG2 SERPINB5 TP63 DSC3 UPK1B EZR TACSTD2 PSMD11 CTSH F11R ELF3 PFN1 FERMT1 DVL3 JAG1 DSP CNFN BMP2 GATA3 KRT10 AFDN FGFR2 ABI1 TGM2 MYO1E NTN4 CDC42 SDC1 TGFB1 MAP2K2 PSMB5 MMP…	PR vs. SD
CELL JUNCTION ORGANIZATION	0.00010686	0.00607786	-0.534214	-1.85383	KRT5 CD9 PERP DST JUP ACTG1 LSR CLDN1 ACTN4 ACTB PKP1 GJA1 LAMB3 DSG2 GJB6 ITGA6 GJB2 F11R ITGB4 DSP LAMC2 AFDN COL17A1 CDC42 TGFB1 MMP14 ITGA2 POF1B RAP1B PTPRK DLG1 SNAI2 PARD3 CDH3 NECTIN4 PRKCI SH3BP1 FSCN1 PTK2 PLEC LRP1 SLK S100A10 NECTIN2 CXADR	PR vs. SD
RESPONSE TO INTERFERON BETA	0.000256805	0.00946328	-0.748688	-1.86941	IFITM1 IFITM3 BST2 PLSCR1 IFI16	PR vs. SD
EXTRACELLULAR STRUCTURE ORGANIZATION	0.000110889	0.00607786	-0.566455	-1.87953	CAPNS1 MMP7 ITGB6 BCL3 LAMB3 SERPINB5 ITGA6 F11R ELF3 FERMT1 ERO1A ITGB4 LAMC2 COL17A1 ITGB1 MYO1E NTN4 TGFB1 MMP14 ITGA2 LCP1 DNAJB6 FBLN1 MFAP2 ITGB8 APP ANXA2 TNFRSF1A CD44 FSCN1 PTK2 SPINT2 WASHC1 LRP1 CAV2 PRDX4 RGCC COL4A5 ADAM10 CTSS	PR vs. SD
NEGATIVE REGULATION OF MULTI ORGANISM PROCESS	0.000109553	0.00607786	-0.56119	-1.89222	KRT6A IFITM1 IFITM3 BST2 SLPI PLSCR1 ZFP36 OAS1 MX1 IFI16 GJA1 GSN VAPA ZNF639 RIOK3 ISG15 NUCKS1 TNFAIP3 ADAR TSPAN6 RESF1 OAS2 PML ANXA2 PTPN2 UFD1 EIF2AK2 SAMHD1 ARHGDIB PCBP2 OAS3 TRIM28 PRDX4 STAT1 HDAC1 SEC14L1 ILF3 TTLL12	PR vs. SD
INTERACTION WITH HOST	0.000108026	0.00607786	-0.55779	-1.91276	KRT6A IFITM1 IFITM3 CTSB ALYREF CLDN1 THOC3 CD81 ITGB6 HSPA1B GSN PPIA CHMP4B VAPA F11R DYNLT1 ZNF639 GAPDH PABPN1 ITGB1 TGFB1 CD46 KPNA4 ITGA2 SCARB2 SLC1A5 PML TFRC EGFR RRAGA NECTIN4 EIF2AK2 TRIM28 ATG5 P4HB CAV2 WWP1 TCP1 SLC20A2 NECTIN2 CXADR KPNA2	PR vs. SD
CELLULAR HORMONE METABOLIC PROCESS	0.000121418	0.00607786	-0.673793	-1.929	SCPEP1 RDH10 ALDH1A1 CRABP2 AKR1C1 DHRS3 TSPO RBP1 BMP2 EGR1 COMT ECE1 ADM TIPARP CYP2S1	PR vs. SD
CHLORIDE TRANSPORT	0.000129988	0.00628206	-0.813867	-1.94403	GABRP FXYD3 PRNP TSPO APOL1 CLDN4	PR vs. SD
EPITHELIAL CELL DIFFERENTIATION	0.000102722	0.00607786	-0.533986	-1.95177	KRT17 KRT6A KRT5 KRT13 CTSB PERP KRT15 SPRR2A JUP KRT19 CSTA CAPNS1 RHCG CLDN1 TAGLN2 PRNP DSG3 BTG1 SERPINB13 ZFP36 IRF6 ADAM9 CD24 PKP1 PGK1 PALLD CD109 KRT23 KLF5 DAB2 LBH SKIL AKR1C1 DSG2 TP63 DSC3 UPK1B EZR F11R ELF3 JAG1 DSP CNFN BMP2 GATA3 KRT10 AFDN FGFR2 MYO1E CDC42 SDC1 ITGA2 TAF10 POF1B ZFP36L1 RAP1B PCNA FOSL2 CDH3 ANXA4 HES1 TXNIP ANXA2 TNFRSF1A LGALS3 WNT7B SH3BP1 TJP2 SPINT2 ACADVL…	PR vs. SD
HOMOTYPIC CELL CELL ADHESION	0.000120846	0.00607786	-0.691322	-1.99285	CD9 MYL12A JUP ACTG1 ACTB HSPB1 DSG2 F11R DSP MYH9 MYL9 GNAS CD99	PR vs. SD
REGULATION OF VIRAL GENOME REPLICATION	0.000114771	0.00607786	-0.636629	-2.0114	IFITM1 IFI27 IFITM3 BST2 SLPI PLSCR1 OAS1 MX1 IFI16 PPIA VAPA PABPC1 DDX5 ISG15 NUCKS1 ADAR RESF1 OAS2	PR vs. SD
EPIDERMIS DEVELOPMENT	0.000106191	0.00607786	-0.610661	-2.13047	KRT17 KRT6A KRT5 KRT13 PERP KRT15 SPRR2A JUP KRT19 PTHLH CSTA CAPNS1 DSG3 SERPINB13 ZFP36 EMP1 IRF6 ADAM9 PKP1 CRABP2 PALLD CD109 KRT23 LAMB3 DSG2 TP63 DSC3 ELF3 FERMT1 JAG1 DSP CNFN KRT10 LAMC2 FGFR2 COL17A1 ZFP36L1 FOSL2 CDH3 EGFR HES1 FOXQ1 TXNIP	PR vs. SD
SKIN DEVELOPMENT	0.000108026	0.00607786	-0.664868	-2.27995	KRT17 KRT6A KRT5 KRT13 PERP KRT15 SPRR2A JUP KRT19 CSTA CAPNS1 LSR CLDN1 DSG3 SERPINB13 ZFP36 IRF6 ADAM9 PKP1 PALLD CD109 KRT23 DSG2 TP63 DSC3 ITGA6 CLDN4 FERMT1 JAG1 ITGB4 DSP CNFN KRT10 FGFR2 GNAS ITGA2 ZFP36L1 FOSL2 CDH3 EGFR FOXQ1 TXNIP	PR vs. SD
KERATINOCYTE DIFFERENTIATION	0.000111982	0.00607786	-0.709036	-2.32099	KRT17 KRT6A KRT5 KRT13 PERP KRT15 SPRR2A JUP KRT19 CSTA CAPNS1 DSG3 SERPINB13 ZFP36 IRF6 ADAM9 PKP1 PALLD CD109 KRT23 DSG2 TP63 DSC3 JAG1 DSP CNFN KRT10	PR vs. SD
CORNIFICATION	0.00012164	0.00607786	-0.838453	-2.38911	KRT17 KRT6A KRT5 KRT13 PERP KRT15 SPRR2A JUP KRT19 CSTA CAPNS1 DSG3 PKP1 KRT23 DSG2 DSC3 DSP KRT10	PR vs. SD
