# Supplementary material for: Unveiling the influence of tumor and immune signatures on immune checkpoint therapy in advanced lung cancer
Source: eLife. 2024 Nov 8;13:RP98366. doi: 10.7554/eLife.98366 (PMC11548875; doi:10.7554/eLife.98366)
Supplement: Supplementary file 5. [file elife-98366-supp5.xlsx]

## Sheet: Tumor signatures
Table S5. Gene list of tumor signatures.
INT.up	UNION.up	INT.down	UNION.down	NMF.p1	NMF.p2	NMF.p3	NMF.p4	scINSIGHT.PR.m	scINSIGHT.SD.m	scINSIGHT.PD.m	PC1.pos	PC1.neg	PC2.pos	PC2.neg	PC3.pos	PC3.neg	PC4.pos	PC4.neg	PC5.pos	PC5.neg	PC6.pos	PC6.neg	PC7.pos	PC7.neg	PC8.pos	PC8.neg	PC9.pos	PC9.neg	PC10.pos	PC10.neg
LYZ	LYZ	ARFGAP3	PSMC3	RPL10	RPS18	RPL41	S100A9	SCGB3A2	CXCL1	SCGB3A2	LYZ	C20orf85	LYZ	LAMB3	KRT5	NAPSA	MDK	SRGN	CPS1	CD3E	TAC3	HLA-A	SPRR3	MMP13	DST	AL365226.2	C15orf48	SCGB3A1	NTS	SPRR3
SNHG29	SNHG29	NDUFA13	MAP1LC3B	TMSB10	RPS2	S100A11	S100A8	H19	KRT17	SLPI	RNASET2	ERICH3	WFDC2	EMP1	KRT6A	SFTA2	TMSB4X	CPS1	AKR1C3	PTPRC	MS4A15	CD74	SPRR1B	MXRA5	EREG	CRABP2	AGR3	AQP5	GAS6	TMPRSS11D
RPS4Y1	RPS4Y1	GTF2H5	DDRGK1	RPL41	RPL13A	EEF1A1	EEF1A1	RPS4Y1	CCL20	SFTPA1	HOXB9	DNAH12	AZGP1	MTRNR2L12	KRT17	CEACAM6	SFTA3	DUSP4	AKAP12	CD3D	EFEMP1	C4orf48	SPRR1A	BST2	LYZ	WFDC3	GTSF1	ADGRF5	GAGE12H	LCN2
GAS5	GAS5	HMGN3	STK38L	RPL28	RPL41	KRT19	S100A11	MSLN	KRT13	MSLN	PLAU	SNTN	CALML4	PLEC	ACKR3	LPCAT1	NPC2	CD3E	NNMT	CD2	SLC7A10	HLA-DQB1	TMPRSS11E	AC245041.2	EFNB2	LY6K	FSTL1	CDKN2A	CALML3	MXD1
RPL13A	RPL13A	SNX9	ELOVL5	RPL30	RPL19	CD9	SPP1	CEACAM6	MMP7	AQP5	S100A16	C9orf24	ID2	IFI27	IGFBP2	MSLN	NAPSA	AKR1C2	RIMKLB	IL2RG	MDFI	LYZ	PITX1	ITGB6	CCND1	AC103702.2	MUC16	MALL	KRT5	RHCG
SLC25A6	SLC25A6	CBR1	MTLN	EEF1A1	RPL13	IFI27	RPS18	UPK2	IGFBP7	CRIP1	AZGP1	LRRC46	HOXB9	DSG2	CSTA	HOPX	SFTA2	AKAP12	AKR1C2	CORO1A	UPK2	TIMP1	TMPRSS11D	IFITM3	SFTPB	TNNC2	MDFI	SDC2	KRT15	TMPRSS11E
RPS17	RPS17	GSR	CSNK2B	RPS8	EEF1A1	B2M	RPL13A	CRIP1	LY6D	SCGB3A1	CALML3	RSPH1	SPRR2F	IFITM1	FXYD3	SFTA3	CLDN4	GLRX	S100A16	RAC2	APOE	C15orf48	KRT16	AC103702.2	SFTPA1	PPP1R14D	TAC3	SUSD2	CXCL14	IL1RN
RPL17	RPL17	COA6	CXCL16	CXCL14	RPL3	RPL39	RPS16	AGR2	NUPR1	AGR2	ADM	FAM92B	ECRG4	ZFP36L1	KRT13	MUC1	HOPX	RIMKLB	PTGR1	CD3G	SLC2A3	PLAAT4	SPRR2D	CP	PDGFA	KRT20	PLAU	AC008268.1	GPI	RNF39
RPL27A	RPL27A	SNU13	PSMA5	RPL11	RPL17	IFITM3	RPS12	STMN1	AGR2	MALL	NRN1	MS4A8	CCDC78	MET	PKP1	SLC22A31	BCAM	PTPRC	TXNRD1	LSP1	THSD7A	PLAU	RHCG	GABRP	SCGB3A1	TREM1	ID2	PGC	AC090204.1	A2ML1
MT3	MT3	HSPB11	G3BP2	RPL12	RPS6	ACTG1	TPT1	APOE	CCL2	STMN1	CXCL8	CCDC170	NRN1	CTSB	GPNMB	CRIP1	SOX4	FXYD2	FGL1	CD52	HIST1H2AE	PITX1	IL1RN	CCL2	CDC42EP3	PPP1R1B	GABRP	CA2	MMP28	SPRR2A
SNHG5	SNHG5	EIF5	YWHAG	RPL8	RPL27A	FXYD3	LDHB	WFDC2	MMP13	SFTA2	NDRG1	CFAP157	CKB	BST2	KRT15	MUC21	ADGRF5	AKR1C3	S100P	GZMA	CLDN6	SPRR1B	ECM1	ANXA8	SOD3	HOXB2	TUBB3	C16orf89	SFN	NDRG2
RPL23A	RPL23A	SDCBP	MTX1	RPS23	RPL23A	RPLP1	MT-ND2	AGR3	ISG15	SFTPB	SPRR2A	LDLRAD1	C20orf85	KRT19	CLDN1	SLC34A2	RNASE1	CYBA	NOS1	LCP1	HIST1H1C	HLA-DRB1	MXD1	FMO3	PTGS2	NDRG1	DST	CRLF1	CTSE	FUT3
ZFAS1	ZFAS1	IFI35	LGALS1	RPS7	RPLP1	RPL28	RPS27	S100P	IFI6	SERPINH1	CA12	CCDC78	TUBA1A	SFN	CALML3	RNASE1	KRT19	KYNU	AKR1B10	NKG7	H19	RAB27B	CSTA	CCL20	MT-ND3	IGKC	RHOBTB3	FASN	LMO3	KRT23
RPS2	RPS2	EIF2S2	CHCHD1	RPL32	RPS14	MTRNR2L12	NNMT	GDF15	IGFBP2	S100A4	TMSB4X	CDHR3	CA12	PMEPA1	DAPL1	LMO7	AGR2	CD2	S100A9	TRBC2	C5orf38	MUC21	SPRR2A	LY6D	FN1	PAEP	SNCG	SHISA2	GAGE2A	SDCBP2
RPL3	RPL3	MORF4L2	VMA21	RPS15A	RPL21	H3F3B	MT-ND1	CAV1	KRT6A	GDF15	PLAT	CAPSL	FAM216B	CD9	DSG3	CST6	LPCAT1	S100A9	SLC7A2	HCST	COL2A1	HOXB9	PRDM1	TMEM150C	RAB27B	XIST	NLRP2	AQP1	ODC1	SPRR1A
RPS6	RPS6	CALCOCO2	ARFGAP3	RPS3	RPL18A	RPL10	RPL9	TUBA1B	IFITM3	CAV1	NDUFA4L2	FAM183A	TMEM190	IFI6	PTHLH	SFTPB	CEACAM6	IL2RG	SOD2	GMFG	AXL	HLA-DRB5	FUT3	MMP10	CXCL14	CSTB	TGM2	NPC2	CASC19	PSCA
RPL21	RPL21	ARPC3	C11orf58	RPL13	RPL12	RPS19	MT-CO3	HOPX	MIR205HG	HOPX	SPRR2F	CFAP43	C11orf88	CEBPD	GJA1	CXCL14	EFEMP1	NNMT	KYNU	LCK	ID1	RRAD	TMPRSS11A	DAB2	NR4A1	VAMP5	TINAGL1	HSPA1A	FBXO27	RDH10
RPL4	RPL4	TAX1BP1	PTS	RPS24	RPL10	ACTB	RPS11	ID1	KRT15	HSPA1A	RHOV	C11orf88	FAM92B	IGFBP4	SOX2	FTL	MALL	FGL1	FXYD2	RGS1	CCK	IFI27	KRT13	APOD	SERPINA1	GPR171	CST6	C11orf96	LGALS7B	DHRS9
SNHG8	SNHG8	COTL1	COPE	RPL29	RPL32	TMSB10	RPL13	SLC2A3	ANXA1	RNASE1	FBLN1	TSPAN19	OMG	TNFSF10	TP63	METRN	GDF15	CD3D	HSD17B2	CD69	FSTL1	CXCL14	H19	MMP7	HPGD	IGLC2	AC245041.2	MFSD2A	FN1	SPRR2D
RPL7	RPL7	SUPT16H	MEA1	RPL26	RPL7A	IFITM1	RPS2	ANXA1	SOX2	NAPSA	NFKBIA	DNAH9	TSPAN19	ITGB8	GPI	EREG	SLC34A2	TXNRD1	FGA	LCP2	PPP1R14A	CXCL8	GJB6	TCIM	NRP2	SEC61G	PRSS22	GGTLC1	SERPINA1	ECM1
EEF1G	EEF1G	UBE2M	CHMP4A	RPS14	RPS12	SPINT2	RPL28	TUBB	BST2	CKS2	CALD1	ROPN1L	DNAH9	IFITM3	DSC3	FOLR1	FOLR1	CD3G	PDE10A	LAPTM5	GTSF1	PDZK1IP1	PRSS27	HMCN1	HLA-DQB1	HILPDA	MS4A15	CADM1	ATF5	TP53INP2
RPL5	RPL5	PRKAR1A	ATXN10	RPLP1	RPS3A	EIF1	RPS23	CLDN6	CP	AQP3	CHI3L1	CES1	ERICH3	FLNA	PERP	GDF15	CST6	SOD2	SLC7A11	CXCR4	AGR3	NDUFA4L2	TAC3	S100A6	AQP1	DPYD-AS1	BASP1	LINC00665	NRG1	SERPINB11
RPL23	RPL23	PLIN3	SENP6	FAU	RPLP2	RPS28	SOD2	APOC1	MYL9	ANXA1	S100A14	CAPS	VMO1	TMEM238	PTPRZ1	LMO3	MAL2	NOS1	BARX1	CD7	SOX4	DHRS9	SPNS2	COL4A6	CLPTM1L	PDLIM3	THSD7A	GPR160	TP63	SERPINB2
RPL6	RPL6	PSMB1	UFM1	CD74	RPL7	TMSB4X	FTL	CKB	SELENOP	IER3	FXYD5	CCDC17	SPATA18	MX1	PRNP	CEACAM5	SFTPB	RNASET2	GLCE	LAT	ALPG	S100A14	DSC2	TFPI2	PLAT	KRT19	ERP27	SFTA3	FSCN1	ATP12A
RPL19	RPL19	ATP1A1	CLINT1	RPL7A	RPL29	LY6D	RPL29	PRSS23	CD24	TUBB	MDK	TMEM190	IGFBP2	COL17A1	CD9	PLAAT4	ICAM1	GBP2	IGFBP1	ITM2A	CSAG1	CALML3	SCEL	NLRP2	MDM2	RAMP1	CXCL8	SCD	MAP4K1	ALDH1A3
RACK1	RACK1	UBE2A	SLC2A4RG	JUN	RPS3	RPL30	CYBA	MYL9	CLDN4	CDKN2A	IER3	CDHR4	AL357093.2	TACC1	ANXA8	HPGD	SLC9A3R2	TRBC2	PAQR5	CCL5	HIST1H2BG	NFKBIA	RNF39	NLRP7	CADM1	IGHG4	SRPX2	MB	EIF4EBP1	FAM3D
RPL7A	RPL7A	SDHC	TPD52L2	RPS4X	RPS19	SAT1	RPL21	SELENOP	EMP1	CKB	AL445524.1	DNAAF1	LDLRAD1	HLA-A	GABRP	CAMK2N1	TMEM265	AKR1B10	CLDN10	DUSP2	NUPR2	CXCL17	IVL	IFITM1	NPC2	S100A4	ANXA3	AP000527.1	CYP2S1	PRSS22
FGGY	FGGY	CXCL17	CISD3	RACK1	RPL34	KRT17	RPL18	SOX4	HSPB1	SOX4	FAM43A	SAXO2	C9orf24	CLDN1	NPL	HSPA1A	SCGB3A1	GZMA	SPP1	CST7	ICAM4	SPRR2A	S100A8	CXCL1	KCNN4	C12orf75	TIMP1	NRGN	PLTP	SLPI
RPL31	RPL31	AZIN1	DMKN	RPL34	RPS17	RPL19	MT-ND3	CKS1B	PMEPA1	CKS1B	SLC6A8	DYNLRB2	RSPH9	TCIM	ANXA8L1	KRT7	FTH1	GPRIN3	TDP2	CD8A	BCAM	CTSE	CLCA2	MMP2	ADGRF5	S100P	KRT7	AL589182.1	LPCAT1	PRDM1
RPL10A	RPL10A	GALNT2	NDUFB6	RPS12	RPL6	HSPB1	MIF	TUBB3	H1F0	KRT18	DST	ZMYND10	AC013264.1	TM4SF1	GSTA4	FN1	APOE	TNFRSF1B	FGB	TBC1D10C	BASP1	KRT16	KRT6B	TMEM98	TNC	IGHA1	UPK2	SFRP5	EREG	MALL
RPS18	RPS18	HPRT1	RAB5C	RPS27A	RPS9	H3F3A	RPL37A	CD24	TACSTD2	CLDN4
RPS9	RPS9	DNAJC15	MRPS18C	RPL19	TPT1	LY6E	RPL6	KRT18	TNFSF10	ARL6IP1
CEACAM6	CEACAM6	TFRC	RALA	NAPSA	RPL11	COX6B1	RPL26	CLDN4	RND3	HSPB1
SNHG7	SNHG7	CHMP1B	NDUFS5	RPS3A	RPS7	COX7A2	RPS3A	BASP1	DST	DUSP6
RPS20	RPS20	ZFP36L1	HTATIP2	RPS5	RPL15	RPS27	S100A10	KRT7	IFI16	TACSTD2
RAB3C	RAB3C	CBX3	NDUFB8	CEBPD	RPS23	KRT6A	S100A16	TPM2	TCIM	BTG2
NACA	NACA	EID1	UFC1	RPL39	RPL9	RPLP0	SERPINB1	H1F0	COL17A1	MUC1
RPL14	RPL14	SRP9	CAP1	RPL24	RPS8	MYL6	RPL37	TACSTD2	CLDN1	CLDN3
RPSA	RPSA	RAB18	WDR34	RPLP0	RPL10A	PTMA	RPL3	ID2	DSG2	MARCKSL1
RPL13	RPL13	UBA1	HNRNPF	RPL14	RPS15A	RPS5	RPS14	YPEL3	KRT19	SCD
RPLP2	RPLP2	EGFR	YES1	RPL18	RPL14	S100A6	RPSA	CLDN3	IFITM1	HIST1H4H
RPS7	RPS7	TOB1	PDCD10	SFTPB	RPS5	CTSB	HBA2	MARCKSL1	KLHDC7B	HMGN2
RPS14	RPS14	NAA20	TMEM238	RPS13	RPL8	GAPDH	LDHA	ID3	DNAJB1	ADGRF5
RPL34	RPL34	PUF60	UQCC2	RPS18	RPL18	CCL2	COX7A2	HMGN2	TMEM98	PPP1R14B
RPS3A	RPS3A	MZT2B	LAMB3	RPS6	RPS27A	RPL12	RPS10	H1FX	LBH	SELENBP1
RPL15	RPL15	HLA-C	FOXQ1	RPS26	RPLP0	MIF	MT2A	DMKN	C19orf33	TSC22D1
TMEM176B	TMEM176B	SMIM26	MYO1E	RPS25	RACK1	TACSTD2	RPS24	KRT19	IGFBP4	CENPX
RPL29	RPL29	WDR66	EIF2S1	RPL35A	RPS4X	MYL12B	RPS19	FSTL1	CTSB	C19orf33
CAMP	CAMP	UBE2V2	VPS25	RPL5	RPL26	RPL36	GLRX	GSTM3	S100A10	S100A10
KIT	KIT	IER3IP1	SERTAD1	RPL6	RPL36	BST2	MT-ATP6	C19orf33	CEBPD	CEBPD
RPL18A	RPL18A	UPP1	SCOC	RPS19	CSTB	RPS16	SCGB3A1	S100A10	TM4SF1	TM4SF1
RPL24	RPL24	SNX6	SLC50A1	RPL15	KRT19	RPS12	BPIFB1	CEBPD	SAT1	SAT1
EPB41L4A-AS1	EPB41L4A-AS1	ABHD17C	TMBIM4	RPS16	RPS16	RPL8	NPC2	SAT1	NPC2	JUNB
EEF1B2	EEF1B2	UBL5	CLTB	RPL13A	RPL28	RPL7A	MT-CO2	GAS5	TIMP1	NPC2
ID2	ID2	HSP90AB1	DUSP5	RPS17	SPINT2	EEF2	MT-CO1	CSTB	SERPINF1	GAS5
RPL27	RPL27	MRPL52	CYB5R3	RPL7	HSPB1	RPL37	MALAT1	PHGDH	CALD1	S100A16
RPL37A	RPL37A	CNIH4	IDH3G	SERF2	RPL35A	RPS8	RPLP1	KCNQ1OT1	ATF3	TNFRSF12A
RPS5	RPS5	IER5L	RPL39L	RPL37	FXYD3	KRT5	MT-CYB	HIST1H2AC	LAPTM4B	CRIP2
RPL11	RPL11	PABPC1	STK17A	RPL10A	B2M	RPL18A	FTH1	HIST1H1C	IFI27	HIST1H2AC
RPL12	RPL12	KRT10	EAPP	RPL37A	RPS28	RPL35A	BPIFA1	IER2	MX1	HIST1H1C
RPL32	RPL32	PTP4A2	SYPL1	PTMA	S100A8	RPS4X	CST3	GPRC5A	GPRC5A	MZT2B
HLA-DQB1	HLA-DQB1	CYTOR	ATP6V0B	RPS27	S100A11	RPS27A	TMSB4X	MZT2B	ALYREF	IFT57
ADIRF	ADIRF	WDR45B	NDUFA13	RPL23A	RPS27	RPL3	RPL8	IFT57	MZT2B	ZFP36L1
INSIG1	INSIG1	NDUFA3	SDC1	S100A10	RPS21	RPS7	SFTPA1	KLF6	FXYD5	BCL7C
EMB	EMB	XRCC6	MYL9	EEF1G	RPS13	RPS15	CD63	EMP2	ZFP36L1	FOXJ1
HLA-DRA	HLA-DRA	SQSTM1	UBA2	RPL27A	HLA-B	RPL17	SERF2	NME4	MARCKS	EMP2
RPL38	RPL38	SF3B4	PMEPA1	RPS20	CD9	PABPC1	RPL12	MDFI	TUBA1C	NME4
RPS3	RPS3	IDS	BET1	RPS11	GAPDH	PERP	HSPB1	MDK	HSPA1B	MDK
NPM1	NPM1	MT1X	GID8	SOX4	CD74	PPIA	RPL30	SERPING1	DHRS3	HSPA1B
BTF3	BTF3	HDGF	ABHD11	H3F3A	KRT15	RPS3	SFTPC	EFEMP1	FXYD3	HIST1H2BD
RPL9	RPL9	ALDH2	KLF10	RPL21	ACTG1	RPL6	ATP1B1	STARD10	HSPA8	NEAT1
RPL18	RPL18	SEPTIN7	PAPOLA	RPS9	CALML3	KRT15	MT-ND4	ID4	CD9	ID4
CREG1	RPL36	ADAR	GTF2H5	APOE	HLA-C	RPS3A	MDK	H2AFV	OAS1	H2AFV
TMEM176A	CREG1	CAPZA2	ANKRD12	ID1	KRT13	RPL7	RPS9	SH3BGRL3	CALML3	FXYD3
PDK4	TMEM176A	ARF1	POLR2J	RPL4	COX6B1	RPL26	SSR4	FXYD3	CITED4	SLC9A3R2
NAP1L1	PDK4	ARPC5L	DHRS3	RPS2	RPL30	RPL35	RPS27A	CLDN7	PTMS	FTL
RPS25	EEF2	PSMD4	SMAP1	NACA	RPL37	RPL4	RPL7A	PTMS	FTL	KRT8
EVI2B	NAP1L1	PGAM1	PSMA2	S100A6	RPS26	RPL36A	RPLP2	CPM	BRI3	HMGB3
RPS23	RPS25	C14orf119	SAP18	HLA-A	HLA-A	HSP90AB1	RPL32	DSP	KRT8	LY6E
RAB11FIP1	EVI2B	CCT5	HMGN3	CEACAM6	GSTP1	RPL15	RPL15	FTL	ITGB6	S100A6
PFDN5	RPS23	ASS1	FAM177A1	FTH1		HNRNPA1	LY6E	CHPT1	LAMB3	CD55
RPL22	RAB11FIP1	EIF5A	NDUFC1	KRT19		RPL5	APLP2	KRT8	LY6E	MGST1
RPS8	PFDN5	JUNB	LSM8	KRT18		RPL10A	HSPA1A	RHOBTB3	S100A6	HMGA1
UBXN1	APOC1	MRPL13	MRPL27	KRT8		SPRR3	RPL11	LY6E	MGST1	SFTA3
LDLRAD4	RPL22	PFN1	HNRNPAB	ACTB		SPRR2A	RPL24	SLC40A1	HLA-A	FOS
RPL26	RPS8	UBE2H	RIOK3	PLAAT4		CSTB	NME2	CD55	ANXA3	MT-CO2
NOP53	RPL41	RBX1	DNAJB6	MGST1		SPRR2D	ATP5F1E	MGST1	ZFP36	XBP1
EIF3D	UBXN1	ILF2	ADH5	UBC		SPRR1B	RPS15	CRNDE	FOS	MAL2
EIF3M	LDLRAD4	H2AFV	MPLKIP	HLA-C		ANXA1	HLA-DRA	IDH2	LDHB	CD59
RPS15A	CALML3	BZW1	ATP6V1C1	FTL		RHCG	MUC1	HMGA1	LSR	ST6GALNAC1
SNHG3	RPL26	SUMO2	CTSL	RAC1		KRT16	S100P	BCAM	GAPDH	JUN
RPS19	NOP53	CDC42	UQCR11	SAT1		KRT13	RPL10	XBP1	TYMP	FASN
RPS13	EIF3D	ARPC5	RNASEH2C	HOPX		SPRR2E	RPL14	LDHB	GPNMB	CD47
RPS27A	EIF3M	UBE2L3	IGFBP4	CLDN4		HOPX	RPS8	LSR	SELENOM	CYBA
RPL35A	RPS15A	CCT6A	ITGA2	SPRR1B		TPT1	RPS3	UCP2	SERTAD1	PFN2
UBA52	SNHG3	C12orf75	NDUFA6	KRT7		CLDN4	RPS5	GAPDH	RPL22L1	CYSTM1
CRYM	RPLP0	NDUFV2	DDX24	LGALS3		LCN2	HLA-B	CD47	KRT5	SIVA1
ERP29	SNHG32	UQCR10	HSPH1	ANXA2		CNFN	RPS15A	CYBA	ACKR3	AGER
MIB2	RPS19	SNRPG	KATNBL1	SPINT2		CSTA	B2M	SELENOM	HLA-B	PRSS8
RHOBTB3	RPS13	TMBIM6	SSR3	PPDPF		CRCT1	TMSB10	SERTAD1	SVIL	S100A13
COX4I1	RPS27A	MCM3	SYNGR2	TPT1		SPRR1A	HLA-A	CXCL8	CCL5	PAEP
RAB27B	RPL35A	SLC39A4	RTL8C	PABPC1		C15orf48	RPS6	HLA-DRA	NKG7	VIM
ATP5PO	UBA52	TSC22D1	TACC1	CD9		EMP1	AKAP12	CD74	CCL4	IGFBP3
RPS4X	CRYM	COA3	ECHS1	ITM2B		S100A8		C15orf48	GNLY	CD74
PMAIP1	ERP29	APH1A	FAM50A	NFKBIA		UBC		MT2A	AREG	MT1X
EIF3F	MIB2	KLF5	IFITM2	SELENOW		UPP1		NUPR1	GZMA	CEACAM6
IGFBP6	RHOBTB3	PCNA	NCL	GSTP1		MYL12A		HLA-DPB1	CORO1A	C15orf48
IMPDH2	COX4I1	ANP32E	SNX9	TACSTD2		S100A9		ADIRF	CCN1	CEACAM5
GCLC	RAB27B	TXN	CBR1	AGR2		CD24		HLA-DRB1	CRIP1	WFDC2
CLEC2B	ATP5PO	GGCT	JUND	HLA-B		FXYD5		IGFBP2	CTSW	NDRG1
EIF3G	RPS11	TMEM230	SERP1	C19orf33		SLPI		TUBA1A	RGS1	LGALS1
RPL35	HLA-DRB5	NDUFA1	MTUS1	ANXA1		ZFP36		LYZ	SRGN	GPX2
PEBP1	RPS4X	FIS1	TSPAN6	LCN2		JUP		MIR205HG	GZMH	S100P
TPT1	PMAIP1	EZR	MBD2	MSLN		NCCRP1		PLAC8	TYROBP	IFITM3
GFI1B	HLA-DRB1	LRP10	GSR			ELF3		H2AFZ	CD69	TUBA1A
ZNF581	CD74	HNRNPA2B1	LRRC59			S100P		LDHA	HCST	FHL2
HLA-DPB1	SOX4	STMP1	DUT			JUNB		PLAU	PTPRC	EEF1A2
NFIA	ATP5F1D	TPM1	ANXA4					MYC	GZMB	CRABP2
CRYL1	EIF3F	FAM107B	COA6					CLEC2B	TRBC1	MUC3A
ZNF428	IGFBP6	ACTR3	CLTC					TMEM176B	LGALS1	TESC
PLA1A	IMPDH2	YWHAH	PLPP1					HSPB1	IL32	LDHA
LETMD1	FAU	TMCO1	ANXA7					DUSP6	S100A4	VAMP5
LINC01326	GCLC	MAP3K13	SNU13					BTG2	SPON2	PLAU
RAMP2	CLEC2B	PPIA	TWF1					NFKBIA	GMFG	TUBB3
RNASE6	RPS15	SNRPB	TUBA4A					HLA-DRB5	TUBA1A	CD24
ABRAXAS1	EIF3G	FAM3C	DNAJC19					NAMPT	ALOX5AP	KRT7
PLAGL1	LGALS9	HLA-B	GADD45B					CYTIP	HOPX	EGLN3
SNHG6	RPL35	SNRPB2	RNF187					CFD	TIMP3	RND3
C19orf48	PEBP1	EIF4A3	TGIF1					PPP1R14B	HSPA1A	TNNT1
CAMK2B	TPT1	MCL1	TMEM59					EMB	CD7	ERO1A
PAX1	MALAT1	CALM1	ITGB1					HLA-DQB1	IL2RG	KRT19
LRBA	GFI1B	UBC	GPI					TMEM176A	OASL	S100A14
	NUPR1	BCAP31	CACYBP					NPC2	DDIT4	LY6K
	ZNF581	ARF5	BCL3					NPDC1	LINC00342	IFITM2
	CFD	TPM3	RNF7					TIMP1	LSP1	PDLIM3
	HMGA1	PSMB5	HSPB11					SERPINF1	STEAP4	METRN
	HLA-DPB1	GABARAPL1	DAZAP2					SNHG7	SLC34A2	PPP1R1B
	CXCL8	HSPA1B	GBP2					PDK4	PRF1	TIMP1
	NFIA	PKM	C8orf33					METTL7A	CST7	CSTB
	CRYL1	HES1	NIBAN2					BNIP3	KLRB1	TRNP1
	CHPT1	NUCKS1	MCTS1					FXYD5	C12orf75	AL365226.2
	CIRBP	MGST3	MXRA7					KIT	RAC2	TREM1
	ZNF428	HNRNPK	ARL6IP1					NCOA7	FCGR3A	TIMP2
	PRSS21	DYNLT1	NENF					SDF2L1	RIPOR2	BNIP3
	RPS12	RBM8A	GHITM					INSIG1	LCP1	EFNA1
	ATP5MC2	BLVRB	PSMB2					NEAT1	ARL6IP1	PFKFB3
	EIF3E	PGRMC1	LSM5					KLF4	PHLDA1	SH3BGRL3
	PLA1A	HEBP2	EIF6					SERPINB1	SYNE1	EGFR
	LETMD1	PFKP	UBALD2					HSPA8	CCL3L1	HSPA8
	FABP5	MYL6	EIF5					CD9	HLA-DRB5	CD9
	LINC01326	TRAM1	PSMD12					JPT1	YPEL3	JPT1
	C12orf57	PFN2	CD164					PHLDA2	ARHGAP9	PHLDA2
	NOB1	CIB1	RIT1					LDLRAD4	IFITM2	CLDN7
	BCAT1	ERH	IRF6					CCND2	IL2RB	RHOB
	RAMP2	LAMTOR2	BHLHE40					CRYM	ABI3	SQSTM1
	RPS28	ACTB	ARF4					SQSTM1	CITED2	BRI3
	KRT18	PRDX1	RHOV					BRI3	TSC22D3	ENO2
	RNASE6	GPX2	SDCBP					PMAIP1	GZMM	HLA-A
	ABRAXAS1	IL32	F11R					CAMP	HNRNPH1	PCSK1N
	ATF4	LAPTM4B	IFI35					S100A6	CD247	PGK1
	RRAD	ROMO1	URI1					HLA-A	PTGDS	GAPDH
	METTL7A	MIF	ATP5F1C					ODC1	CD53	RGS10
	PLAGL1	HIST1H4C	RBCK1					MT-ND5	TAGAP	SELENOM
	RPLP1	ERO1A	SSR2					FOS	GPR65	TMEM265
	SNHG6	CHCHD2	NSFL1C					MT-CO2	KLF6	HLA-B
	DANCR	UGDH	HIST1H2BD					CD59	TIPARP
	SEC11A	HSP90AA1	GNB2					JUN	SH2D2A
	RPS21	EGLN3	ATOX1					RGS10	GADD45B
	DYRK4	POLR2K	EIF2S2					C19orf48	ADRB2
	PDLIM1	PLSCR1	C6orf62					RPL22L1	LIMD2
	C19orf48	ALDOA	SCD					SPRR2A	ANKRD36C
	NBEAL1	SRI	PFDN6					MT3	SH3BGRL3
	FBL	KRTCAP2	FDX1					HLA-B	CTSS
	CLTA	FOS	PHB						TNFAIP3
	CAMK2B	SEC61B	ENSA						ARL4C
	PAX1	GNAS	MORF4L2						PTPN22
	CYTIP	BTG1	PFDN2						FLNA
	SLC34A2	ZNF706	BRI3						ITGB2
	C4orf48	DAD1	CALCOCO2						MT-ND5
	LINC00662	YWHAZ	ACTN4						MT-CO2
	RPS24	EFNA1	JTB						DUSP1
	EEF1D	SEM1	CALU						EVL
	FCGRT	PSMB3	C1orf21						UCP2
	YBX1	DBI	OST4						CD47
	GM2A	S100A10	SNRPC						CYBA
	LRBA	KRT19	TSPAN1						ARHGDIB
	CCND2	COX7A2	MYO6
	WDR11	COX6C	MRPL50
	SNHG14	APOL1	TMED10
	EIF3L	MT-ND5	ARPC3
	RPS10	ACTG1	OSTF1
	LPCAT1	LDHA	CFL1
	RPS29	BST2	EMC2
	HIST1H1C	LGALS3	H1F0
	DUSP6	SAT1	IFI16
	PLAAT3	DSTN	SCP2
	LSM3	S100A13	TMEM98
	HOPX	ELF3	TAX1BP1
	CUTA	ATP1B1	TMSB4X
	EPCAM	OAS1	ELOC
	MT-ND4	CRIP1	SRXN1
	DUSP23	ISG15	COX7B
	CDKN2A	NQO1	EPHX1
	MT-CO3	S100A16	CCND3
	ETFB	CP	HAX1
	NEAT1	TAGLN2	COTL1
	UQCRB	MYL12A	CTSC
	RPL10	MT-ND4L	NME1
	MT-ND1	PGK1	ANAPC11
	TOMM7	NDRG1	C19orf33
	CD63	S100A6	NDUFAB1
	RBM3	SLPI	MT-ND6
	MARCKSL1	TM4SF1	SUPT16H
	ANTKMT	SOD2	FAM83A
	BNIP3	S100A4	NET1
	TIMM13	IFITM3	UBE2M
	AURKAIP1	LCN2	GCLM
	APRT	CRABP2	PRKAR1A
	CYB5A	S100A11	SYAP1
	HIST1H2AC	IFI27	ATP5PD
	ATP5ME	MTRNR2L12	PLIN3
	PAFAH1B3	SEC61G	GSTA4
	C7orf50		TSC22D3
	TPM2		PSMB1
	CCDC85B		UBE2S
	KRTCAP3		IMPA2
	EIF3H		PALLD
	XBP1		NDUFB5
	ARL6IP4		ATP1A1
	UQCRH		PSMD11
	DDAH2		PSMA4
	TOMM6		UBE2A
	PPA1		SDHC
	GSTM3		COPA
	SDC4		SLC39A1
	COX7C		RPA3
	MDK		VAPA
	NME2		POLR2H
	VASP		CXCL17
	SNRPN		AZIN1
	NDUFB10		CMBL
	MT-ND2		GALNT2
	FTL		HPRT1
	NSA2		DNAJC15
	OCIAD2		ACTL6A
	LYRM4		MPC2
	PNN		ERRFI1
	COX17		TFRC
	OLA1		CHMP1B
	CKB		ZFP36L1
	RPS16		HNRNPU
	NBDY		CBX3
	UQCRC2		WARS
	VKORC1		PRKDC
	NDUFAF8		DNPH1
	MRPL11		ITPKC
	PCBD1		EID1
	RPL36AL		NSD3
	FNIP2		PRDX3
	PPIG		GOLM1
	SNRPD3		LPIN2
	MRPL21		SRP9
	EIF3I		RAB18
	MANF		USP14
	ATP5MG		TUSC3
	RPL36A		UBA1
	CHCHD10		CKS1B
	MCRIP2		SPCS2
	ATP5MPL		SKIL
	CRIP2		RPS27
	CXXC5		YWHAB
	GTF3A		MX1
	NPDC1		EGFR
	RAB32		PCBP1
	TRAPPC2L		DDX5
	PRELID1		ANXA11
	PPDPF		GSTP1
	SH3BGRL		ADAM9
	ATP5MC1		CCT3
	NAA10		TOB1
	SNRPD2		NAA20
	HMGN1		PUF60
	HPCAL1		KRT7
	EDF1		MZT2B
	FIBP		PSMC1
	GDF15		GLO1
	TKT		NDUFA5
	PNISR		HLA-C
	CCND1		SMIM26
	PARK7		WDR66
	EIF1AY		RHOF
	NPC2		UBE2V2
	NPM3		DYNLRB1
	MIR205HG		HSPB1
	IGFBP2		IER3IP1
	WFDC2		PAK2
	CD9		DNAJB1
	FXYD3		B2M
	SPRR2A		DPM3
	PTMS		NANS
	SPINT2		UPP1
	YBX3		SNX6
	KLF4		TOMM6
	HNRNPA1		NDUFB9
	FXYD5		EIF4G1
	CDC42EP3		LSR
	EIF4EBP1		TPM4
	EEF1A1		FKBP3
	DST		ABHD17C
	PHB2		CERS2
	PNRC1		TMEM14B
	PDCD5		UBL5
	SERPINF1		CST3
	NAPSA		HSP90AB1
	CD24		ISG20
	GPI		ZFP36L2
	ANXA1		MRPL52
	SELENOP		CNIH4
	EIF3K		TSPO
	ADD3		IER5L
	PLAC8		PABPC1
	IGF2BP2		MAPK1IP1L
	SYTL1		MRPS21
	S100A2		CHMP4B
	PLD3		PMF1
	TCF4		KRT10
	CD99		PTP4A2
	SLC25A3		SLC6A8
	SNHG1		SERF2
	RASSF6		ZFP36
	PITX1		FASN
	PLAT		AP2M1
	HLA-DPA1		CYTOR
	SHMT2		WDR45B
	UQCRFS1		NDUFA3
	C12orf10		DCXR
	PRKCSH		NDUFB1
	PHGDH		XRCC6
	ATP5IF1		CMPK1
	GGA1		MRPL47
	C15orf48		SQSTM1
	H3F3B		SF3B4
	EML4		IDS
	HSP90B1		NME4
	DHRS9		SMIM14
	AHNAK		SEC62
	YIF1B		FAM49B
	LSR		MT1X
	ATP5F1B		HDGF
	ID1		ALDH2
	SPHK1		LACTB2
	EIF4B		RND3
	PLAU		SEPTIN7
	HAP1		CD81
	PTRHD1		SFTA3
	ATP5F1A		ADAR
	ESPN		LAGE3
			HNRNPL
			CAPZA2
			SPRR2A
			DDT
			MAL2
			PRNP
			MT-CYB
			ARF1
			ARPC5L
			RAMP1
			PSMD4
			PGAM1
			POLR2L
			ASPH
			C14orf119
			CCT5
			SMS
			S100A14
			PSMA7
			CHURC1
			ASS1
			HILPDA
			TMEM141
			EIF5A
			JUNB
			MRPL13
			PFN1
			UBE2H
			LMNA
			HIST1H4H
			FXR1
			RBX1
			ILF2
			H2AFV
			NDUFB11
			CEBPD
			BZW1
			KRT15
			SUMO2
			CARHSP1
			CDC42
			ARPC5
			TDP2
			MRPL14
			UBE2L3
			CCT6A
			C12orf75
			TNFRSF12A
			TUBB4B
			NDUFV2
			UQCR10
			RNASET2
			PSMA6
			LY6E
			THOC3
			SNRPG
			COX16
			TMBIM6
			ATP5MF
			PSME1
			FDPS
			CAPNS1
			MCM3
			SLC39A4
			TSC22D1
			COA3
			DUSP1
			POMP
			HMGB1
			SSBP1
			APH1A
			KLF5
			ATP5F1E
			GUK1
			PSMB9
			MT-CO1
			PCNA
			SQOR
			SELENBP1
			MT-ATP8
			ANP32E
			TXN
			GGCT
			TMEM230
			NDUFA1
			RHEB
			ANXA3
			ENO1
			FIS1
			TMEM14A
			EZR
			LRP10
			HNRNPA2B1
			STMP1
			TPM1
			FAM107B
			ACTR3
			DST
			YWHAH
			GPR160
			TMCO1
			SIVA1
			MAP3K13
			MT-ND3
			PPIA
			RDH10
			SNRPB
			PSMD2
			FAM3C
			VIM
			NDUFB2
			HLA-B
			FTH1
			SNRPB2
			CLDN3
			CETN2
			EIF4A3
			CLU
			CLIC1
			MCL1
			CALM1
			FKBP1A
			UBC
			BCAP31
			ARF5
			TPM3
			PSMB5
			GABARAPL1
			ALYREF
			ANXA5
			NEDD8
			TIMM17B
			HSPA1B
			PKM
			HES1
			CITED4
			PPDPF
			NUCKS1
			MGST3
			ARPC1B
			HNRNPK
			PSMA3
			ENY2
			DYNLT1
			MT-CO2
			RBM8A
			BLVRB
			PGRMC1
			RPL22L1
			DEK
			HEBP2
			PFKP
			MYL6
			BEX3
			SCPEP1
			TRAM1
			GPNMB
			TYMP
			PFN2
			JUP
			SMCHD1
			SSR4
			TMEM30A
			CIB1
			SMIM22
			MARCKS
			SGK1
			ERH
			LAMTOR2
			ACTB
			PRDX1
			GPX2
			RAB5IF
			IL32
			LAPTM4B
			ROMO1
			MIF
			HIST1H4C
			CEBPB
			ERO1A
			PTGR1
			CHCHD2
			UGDH
			HSP90AA1
			EGLN3
			POLR2K
			PLSCR1
			TNFSF10
			ALDOA
			SRI
			KRTCAP2
			FOS
			SEC61B
			GNAS
			BTG1
			RIMKLB
			PSME2
			ZNF706
			DAD1
			YWHAZ
			EFNA1
			SEM1
			AL138963.4
			PSMB3
			SPTSSA
			SOX2
			PHPT1
			DBI
			S100A10
			KRT19
			COX7A2
			PERP
			DAPL1
			COX6C
			APOL1
			MT-ND5
			ACTG1
			CTSB
			LDHA
			BST2
			LGALS3
			SFTA2
			SAT1
			IER3
			IGFBP3
			GLRX
			TCIM
			DSTN
			S100A13
			ELF3
			ATP1B1
			TXNRD1
			OAS1
			MT-ATP6
			CRIP1
			ISG15
			CYBA
			MYL12B
			FTL
			NQO1
			AKR1C3
			S100A16
			CP
			IFITM1
			MALL
			SRGN
			TAGLN2
			MYL12A
			MT-ND4L
			PGK1
			NDRG1
			S100A6
			SLPI
			TM4SF1
			SOD2
			MUC1
			S100A4
			KRT6A
			IFITM3
			LCN2
			CRABP2
			S100A11
			IFI27
			S100P
			HSPA1A
			MTRNR2L12
			SEC61G
			KRT17
			S100A9
			DCAF7
			ISCA1
			CREM
			NGDN
			AKT1
			WNK1
			NR2F2
			MRPL51
			PPP2CA
			PDE4DIP
			PRR13
			MAPRE1
			RAB11B
			SDK1
			DENND2C
			IGF1R
			NEDD9
			SMARCA5
			SF3A2
			CAMSAP2
			BNIP2
			RANGAP1
			DARS
			PSMD14
			RNF141
			SPEN
			LMO4
			SPIRE1
			UBAP2L
			TPBG
			NOTCH3
			TMEM165
			CACUL1
			LAMC1
			MRPL34
			SMG7
			SLC44A2
			GSS
			RSU1
			ZBTB38
			NOP2
			FRK
			MDH1
			CCDC124
			TTLL12
			FRMD6
			PAF1
			RC3H1
			NEK7
			SAMD4B
			RASAL2
			CNOT6L
			DNM2
			PLD1
			SRSF2
			YPEL5
			C8orf76
			SCCPDH
			ILF3
			NBN
			RNF13
			SEC14L1
			RAB4B
			HIST1H2BK
			ZBTB7A
			ABCG1
			CDKN1A
			KYNU
			LINC00511
			FAM91A1
			ATRN
			KDM1A
			SAMD12
			ARL6IP6
			WSB2
			RAB10
			VPS4B
			VPS28
			MALT1
			KCTD1
			KRCC1
			CPNE1
			HDAC1
			LINC01980
			SLC44A1
			STAT1
			TMTC3
			NUCB2
			SMIM19
			BPTF
			RAB40B
			FAM32A
			CNOT11
			MED15
			HACD3
			CORO2A
			CUX1
			PPIC
			CTSS
			DUSP14
			GTF2I
			PRKX
			PARVB
			TOR1AIP1
			GALNT3
			PTPRA
			ACIN1
			TBC1D20
			DPYSL3
			POLDIP2
			IQCG
			TRIP10
			XRN1
			KIF3B
			LSG1
			EP300
			ADAM10
			KMT2E
			MICALL1
			BACE2
			EMILIN2
			COL4A5
			DAP3
			SUMF2
			MPZL1
			WIPI1
			KPNA2
			MID1IP1
			KHDRBS1
			ARL4C
			JAK1
			DHX40
			HDAC2
			CARM1
			DDX3X
			CYP2S1
			PHYH
			KIAA1217
			PTOV1
			FOXK2
			SOWAHC
			SCAND1
			EIF4G2
			TST
			MCCC1
			HIBADH
			BST1
			RGCC
			CXADR
			PRDX4
			GSPT1
			MEF2A
			EFHD2
			TMX4
			ZYX
			CAST
			SOCS3
			AP2A1
			RBMS1
			CASK
			BAG3
			SLC7A8
			SET
			PPP6C
			RABGAP1L
			GPRC5A
			PPP1CB
			GNGT1
			CYTH1
			NECTIN2
			BICD2
			MCM4
			HTATSF1
			COPS2
			MAFF
			CIAO2A
			IFNGR1
			USO1
			IFRD1
			SLK
			PRRC2B
			SLC20A2
			FGFR1OP2
			FBXO27
			ANKRD17
			CRYBG1
			PHLDA3
			NDUFA11
			NGRN
			SAFB
			PIK3R1
			KAZN
			TMEM19
			ABHD17A
			TBL1XR1
			TCP1
			NXT1
			TMEM50A
			TPST1
			LURAP1L
			COPS4
			ADIPOR2
			SUZ12
			OTUD1
			GNAQ
			TIPARP
			MIEN1
			PIGS
			ZNF664
			MKRN1
			LAPTM4A
			WWP1
			PSMD10
			ZDHHC12
			CDKN2AIP
			SEMA3F
			RHPN2
			AGFG1
			CAV2
			EID2
			TMPO
			UBA6
			RANBP2
			HACD4
			NCAPD2
			TMEM150C
			CRTAP
			ELP5
			LAMP2
			TANK
			C1D
			MAOA
			HAUS4
			UHMK1
			LRP1
			TCTEX1D2
			PPP3R1
			SCD5
			PLPP2
			RNF213
			MBNL1
			TMEM40
			P4HB
			ZC2HC1A
			RAB21
			KEAP1
			LSM12
			CTHRC1
			HCAR2
			WASHC1
			MMP24OS
			TPR
			IDH2
			ADGRG1
			ATG5
			RORA
			TRIM28
			POLR2B
			NFE2L2
			SIPA1L3
			UGCG
			CSNK1G2
			PLEC
			QKI
			ATP2A2
			GSK3A
			ICK
			CNDP2
			UBE2Z
			USP6NL
			POP4
			MTAP
			DDX60
			IFT172
			IFT27
			ACADVL
			TMEM183A
			EVL
			PAIP1
			WTAP
			GNB1
			CCNY
			PNRC1
			RALB
			H3F3A
			TTC9
			ASH2L
			LINC01503
			GNA13
			SPINT2
			RBPMS
			HNRNPM
			STXBP2
			FDFT1
			PGM2L1
			PTK2
			NCK1
			GAA
			FAM110A
			DUS1L
			KDM5A
			LUC7L2
			FSCN1
			DYNLL1
			OAS3
			SLC7A5
			TJP2
			DEGS1
			NPEPPS
			TRA2B
			RBIS
			FZD6
			ANKRD13A
			APMAP
			TMBIM1
			SEPTIN11
			CD44
			CMAS
			MAPK6
			ADM
			PCBP2
			HCLS1
			XPOT
			MAZ
			SMARCD2
			SDHD
			SH3BP1
			HSBP1
			TNFAIP1
			LMBRD1
			GCC2
			ZNF146
			PLEKHA2
			HOMEZ
			TRIR
			MEIS2
			ATP2B4
			R3HDM4
			ESF1
			RNPEP
			PDLIM5
			FLOT2
			NDUFS2
			CASTOR2
			TDRD12
			CPNE3
			LMAN1
			RBFOX2
			SAMHD1
			DDIT4
			PIAS3
			SPPL3
			MMADHC
			PEA15
			SPIDR
			WNT7B
			LINC01578
			ARHGAP23
			IARS2
			EIF2AK2
			SERTAD3
			GRSF1
			RSRP1
			NUFIP2
			PTGES
			IGF2BP2
			SEPTIN9
			CD82
			AL445524.1
			TNFAIP8
			LRATD1
			SLC25A5
			DAZAP1
			HERC2
			MRPS30
			PRKCI
			OGFRL1
			RYR1
			RAB14
			LARP4B
			GARS
			PSMD8
			NUDT5
			PPP1R2
			MKNK2
			EPAS1
			SMC5
			CSNK2A1
			USF2
			GTF2A2
			DNAJA1
			G3BP1
			STAT3
			LPCAT4
			NCOA4
			MID1
			HM13
			LGALS3BP
			RAD23B
			SEMA4B
			NECTIN4
			TMOD3
			HS6ST1
			KCNK1
			IMP3
			ACTR2
			UFD1
			YME1L1
			PTPN2
			RASGEF1B
			RAP2B
			ARL5B
			STARD7
			TWSG1
			COX5B
			RBM17
			PSMG2
			ZNRF2
			DERA
			GPCPD1
			MRPS26
			DNAJB11
			REL
			EIF4A2
			RELB
			EWSR1
			IK
			ETV6
			ECE1
			FBXO9
			TNFRSF1A
			STRAP
			HSPA5
			MIR4435-2HG
			PPP1R15A
			POLR2I
			ACBD3
			EPSTI1
			ARL8A
			PITPNB
			TP53TG1
			KCMF1
			PSMD3
			SIAH2
			KREMEN1
			IRF9
			NCK2
			PLAT
			MED21
			ANXA2
			PIR
			AFG3L2
			BCL6
			DNAJA4
			GOLPH3
			APP
			TXNIP
			TECR
			MTRNR2L8
			GNA15
			TSPAN3
			BTBD2
			HMGCS1
			STK24
			ATP6AP2
			RRAGA
			HNRNPDL
			NRBP1
			RRBP1
			IFI44L
			UPF1
			MRPS35
			PIM3
			EIF2B5
			MAPK1
			COPS7A
			IL1R1
			AHNAK2
			CDC123
			SINHCAF
			SUSD4
			FKBP8
			NDFIP2
			MAPKAPK2
			CSRP2
			YTHDC1
			LRRC1
			MAGEF1
			TIMM23
			KMT2B
			ADIPOR1
			GRINA
			MARK1
			FKBP4
			LRP11
			PDIA3
			UBXN4
			PSAT1
			SKP1
			BAG4
			TIMM50
			H3F3B
			PML
			SLC1A5
			PSMF1
			ITGB8
			DCUN1D1
			NUDT4
			M6PR
			CDH3
			NBL1
			MAP3K2
			ENOPH1
			RAC2
			ABCF3
			DDX39A
			RAB31
			MFAP2
			WDR83OS
			PLEKHA5
			SCARB2
			SEMA3C
			MRPS12
			STAP2
			PTBP3
			PIK3IP1
			PSENEN
			BLMH
			PTGES3
			GDI2
			AHNAK
			AC011632.1
			ECH1
			RMND5A
			TPST2
			KLHL5
			EFR3A
			PARD3
			SNAI2
			C15orf41
			GALNT1
			GTSF1
			CDC42SE1
			SHKBP1
			PLXNB2
			OAS2
			DNM1L
			GNB4
			KRAS
			ITM2B
			MSRB2
			FOSL2
			SDCCAG8
			RNMT
			MOB1A
			NPTN
			CTSD
			PHF5A
			SMYD2
			AEBP2
			PSPH
			LIMK2
			CAPG
			TMEM97
			FAM83B
			RESF1
			PLIN2
			PSME3
			DLG1
			ALG3
			C15orf48
			PRSS22
			PTPRK
			SEPTIN10
			MAP1LC3A
			ARNTL2
			PRAME
			FBLN1
			RAP1B
			ATP11B
			SEC31A
			SLC38A2
			TBCB
			LCP1
			KLF3
			POF1B
			ECHDC3
			TAF10
			PSMC4
			BRD4
			UBQLN1
			ACAP2
			NUP54
			COMT
			SFPQ
			IFI6
			KPNA4
			PLP2
			GLTP
			CD46
			CD99
			ARHGAP21
			UCHL1
			VCP
			ZFAND5
			SLFN5
			MLF2
			WFDC2
			YEATS2
			MMP14
			SMARCA2
			PLBD1
			FBXO32
			TNS4
			ENAH
			XRN2
			MAP2K2
			NDRG2
			TGFB1
			ABCA13
			PPFIBP1
			SVIL
			HIST1H1E
			WDR72
			NTN4
			NPL
			TGM2
			FAM135A
			TRIM29
			GALNT8
			EGR1
			CHIC2
			TPI1
			C9orf16
			ZNF385A
			RAI14
			ABI1
			OPTN
			A4GALT
			FNTA
			COL17A1
			EIF4EBP1
			SLC25A1
			TNFAIP3
			MYH9
			AHCY
			FGFR2
			AFDN
			LAMC2
			GATA3
			TMEM41A
			CNN2
			BMP2
			TAF15
			MFN1
			TLE5
			CNFN
			SERPINF1
			ABCC5
			DSP
			PABPN1
			ITGB4
			PLD3
			ST6GALNAC2
			CCNG2
			CKAP4
			GIPC1
			H1FX
			ARL4D
			UQCRFS1
			JAG1
			TUBA1C
			SELENOM
			PDLIM4
			PRRC2C
			GAPDH
			PYCR2
			DVL3
			HNRNPD
			PHF3
			ADSS
			PIK3CA
			AL135905.2
			TMPRSS4
			FERMT1
			NORAD
			PLK2
			SRSF9
			MORN2
			ZNF639
			ETS2
			PPP4R1
			RBP1
			TM2D2
			BIK
			TUBA1A
			GJB2
			PTPRZ1
			CTSH
			MUC20
			CDK2AP1
			AOPEP
			KLHL24
			ITGA6
			MUC16
			LSM1
			B3GNT5
			TACSTD2
			LSM14A
			SELENOP
			GJB6
			ATP1B3
			GPR87
			RALBP1
			UPK1B
			DSC3
			CALD1
			MXRA5
			RBM42
			TUBB6
			TP63
			ANXA8L1
			SERPINB5
			DSG2
			CASC9
			AKR1C1
			CEBPG
			LBH
			PDCD5
			DAB2
			NTRK2
			GSN
			H2AFJ
			A2ML1
			KRT23
			CD109
			FXYD5
			NLRP2
			GJA1
			ITGB6
			LTBR
			ALDH1A1
			COX6B1
			ODF3B
			MMP7
			YBX3
			CCNI
			IGFBP7
			PKP1
			ANXA8
			IGFBP2
			CD24
			CFB
			GLUL
			EMP1
			MIR205HG
			NRARP
			KLHDC7B
			SERPINB13
			ATF3
			DSG3
			CCL20
			AC245041.2
			CLDN1
			RARRES1
			CAPS
			RHCG
			ACKR3
			CSTA
			PTHLH
			FXYD3
			CXCL1
			GABRP
			CD9
			KRT13
			KRT5
			LY6D
			SSU72
			GOLPH3L
			CYSTM1
			MAFK
			SBDS
			CDC5L
			RAB2A
			CAPZA1
			LSM2
			FKBP11
			BANF1
			TMEM125
			CWC15
			PET100
			PARK7
			DCAF13
			GPATCH4
			NDUFB3
			HNRNPH2
			ATP5MG
			CAT
			TAF11
			COX20
			SNF8
			TAPBP
			OSTC
			LGMN
			MRPL24
			AK2
			SDF2L1
			BOLA1
			SLC16A3
			ELOB
			CHCHD7
			HCFC1R1
			PDIA4
			ECI2
			EEF1E1
			HMGN1
			RWDD1
			SOD1
			PSMG4
			MT1E
			NEK6
			MTCH1
			CLDN7
			BNIP3L
			KLHDC2
			PDZD11
			FUNDC2
			UBE2K
			FOLR1
			POLD4
			NKX2-1
			AP2S1
			VMP1
			TPMT
			ISCA2
			TFPI
			MRPS18B
			PGP
			AP1S1
			UBE2C
			UBE2V1
			CYCS
			ZSCAN16-AS1
			TK1
			HMGN2
			CCDC167
			RTRAF
			TPD52
			DAP
			MYLIP
			FHL2
			COPS6
			PSMB10
			AGTRAP
			TMEM120B
			MRPS17
			CNN3
			CBX1
			MRPL33
			MAGED2
			LMAN2
			MPC1
			MALSU1
			HSPE1
			C4orf3
			MRPS14
			APOL2
			NDUFS8
			PRPF6
			SLIRP
			SUB1
			RPL7L1
			PSMC6
			ABCF1
			SRP54
			ATP5MC1
			C18orf32
			LDOC1
			DRAP1
			ASRGL1
			JPT1
			MRPL28
			SERPINH1
			LAMTOR5
			SSR1
			ACTR10
			MFSD12
			NAXE
			MRPL9
			HLA-A
			PITPNC1
			TMED9
			DUXAP8
			UQCRQ
			TMEM208
			AK1
			IL13RA1
			PLAAT3
			PMVK
			PSMB4
			ANAPC16
			SRPK1
			G6PD
			RDX
			CD55
			RHOB
			RAC3
			C11orf54
			C1orf43
			NEU1
			MARCKSL1
			BCL7C
			PPP1CA
			SUMO1
			ZDHHC9
			VBP1
			DPY30
			AGPAT2
			RNF181
			MBIP
			PRSS8
			PYCR1
			RTF2
			MT-ND2
			RBM3
			GLRX3
			PRELID3B
			MRPS10
			MRPS18A
			CKS2
			GMNN
			ATP5MD
			PQBP1
			TMEM160
			FMO5
			ACP1
			UQCRB
			MT-ND4
			NOL7
			YIF1A
			MGLL
			PCLAF
			CDK2AP2
			ERGIC1
			RPL36AL
			MRPL55
			ZNHIT1
			CD2AP
			NELFE
			ST6GALNAC1
			NDUFS6
			POLE4
			ETFB
			CALM3
			TOP1
			METTL26
			ID4
			HMGB3
			DDAH2
			NDUFC2
			PGD
			NR4A2
			NR4A1
			RPP21
			FBP1
			MB
			GPSM3
			CENPX
			FLOT1
			METTL9
			PHLDA2
			TMEM14C
			METRN
			QPRT
			MT-CO3
			APLP2
			SERPINB1
			ACOT13
			PSMB8
			HIST1H1C
			RNF5
			ABCC3
			DUSP4
			BNIP3
			PRR15L
			LY6K
			HMGB2
			FBXO2
			VAMP5
			TKT
			TESC
			MDK
			ADGRF5
			CYB5A
			AQP5
			NPC2
			NNMT
			PCSK1N
			SPP1
			SCGB3A1
